# Supplementary material for: De novo assembly of genomes from long sequence reads reveals uncharted territories of Propionibacterium freudenreichii
Source: PubMed Central journal article supplement (PMC5644110; doi:10.1186/s12864-017-4165-9), 2017-10-16
Supplement: 12864_2017_4165_MOESM24_ESM.pdf [file 12864_2017_4165_MOESM24_ESM.pdf]

The CRISPR spacers within CRISPR arrays identified in *P. freudenreichii*

| Spacer sequence                          | Spacer ID      | Immunity                       |
|------------------------------------------|----------------|--------------------------------|
| CTGGGTAGTAGTATAATCTTACTTGTGATGAAGGGG     | JS_Crispr_2_1  | -                              |
| CCGACGCTTGCGTGGAGCAGCTCGGCGACGTCCCTCTG   | JS_Crispr_2_2  | -                              |
| TGTTGGATGCCTGGCTGGTGGGGATCGTGCGCCACAGG   | JS_Crispr_2_3  | -                              |
| CCCCGAACTGGCGGTCCCGGCCCTCTTCTTCCGT       | JS_Crispr_2_4  | -                              |
| GCGAAGGGGATCAGTTTCCAGCCGGTCCGAGGTCCTGACG | JS_Crispr_2_5  | -                              |
| TGTAGCAACAGTGCTCCAGCATGTCAAGTGTGGGG      | JS_Crispr_2_6  | -                              |
| ACGCCCCGACGTGACATCCATCAGTTCTTCGACCCCC    | JS_Crispr_2_7  | -                              |
| CCTGTCAATCGCCATTGGGCCGCTTGAGAAGCTTGAT    | JS_Crispr_2_8  | E1                             |
| GCTCGGGGATGCTGCCCTGGCGATGCTGCCGACCGC     | JS_Crispr_2_9  | -                              |
| GACAGCGCGGTCCGCTCGATCATCGGCGACCAGCCCT    | JS_Crispr_2_10 | G4,PFR1,<br>PFR2               |
| GACGATAACAAGACTGACCTAACGAATAAGGAAACG     | JS_Crispr_2_11 | -                              |
| GCCTCCAGCGGTGAAAGAGCGGCAGCGCTACGGACG     | JS_Crispr_2_12 | -                              |
| CCGACCCCAAGATGATCAATGAGCGGAAGCACAC       | JS_Crispr_2_13 | PFR1, PFR2                     |
| TTGAAGCAGGCGCCCGCAGCGCCCCATCGCCCGG       | JS_Crispr_2_14 | -                              |
| GACCGGGTGAAGCGCGCCGGGGGCTGAGCATCAAAC     | JS_Crispr_2_15 | -                              |
| GGATCGTAGCGGGGCTGTTGGCAGCAAGTCTCGCTG     | JS_Crispr_2_16 | -                              |
| GACTACAGGTGTTTCGATCTGGTCTGTGGCCGTCGA     | JS_Crispr_2_17 | -                              |
| GTAGGTGGAGGGGCGCAGACATTAATAATCTACGCC     | JS_Crispr_2_18 | -                              |
| CAGAACAACGCTCGAGGAAAGGGTTCCAATCTCATG     | JS_Crispr_2_19 | -                              |
| GGTGTGAGTTACCGCCATATTCGGCCAGAGTCTTGAA    | JS_Crispr_2_20 | -                              |
| CCGTTTCGGCTGTCGCCACCAACTGCTCCGGGATGGGC   | JS_Crispr_2_21 | -                              |
| ACACCCGCGCGATCGAGGCCGACCTGAAACGCTG       | JS_Crispr_2_22 | -                              |
| GACGGCGGGCCAGTTGCACAACACGGCCACCCGCACCAA  | JS_Crispr_2_23 | -                              |
| TTCGCGGTGCGGTGCGCAATGCTGGACGCGTGCCCCGA   | JS_Crispr_2_24 | -                              |
| CTCACGCCCGGAACCCATGCCGGAAGATCAGTCGCC     | JS_Crispr_2_25 | -                              |
| GCGGCGCCTCAGATGGACCTGTCCAGCGGTGAGC       | JS_Crispr_2_26 | -                              |
| ACGGCCTCGCCGTCGCGGCTGATGCTCGCATGCATC     | JS_Crispr_2_27 | PFR1, PFR2                     |
| GCTCGGCGACGCCGCCCTGGCGATGCTGCCGACCG      | JS_Crispr_2_28 | -                              |
| GTGGTTTCGACGCCCTTGTGGGGCCGTGCCTGCC       | JS_Crispr_2_29 | -                              |
| GCCGGTGCTCCCGTCACGCCGGGGCCTTCTTCGG       | JS_Crispr_2_30 | -                              |
| ACCTGGGCGGCCTTCGGATTGTCCAGGTCAAAGAAG     | JS_Crispr_2_31 | -                              |
| GGCGAGTTGGCTCGGACCTCTGGACAATTTTTGGA      | JS_Crispr_2_32 | -                              |
| GCAGCTGCTGGTCGCTTTGGTGCAGGGCATCCTCTC     | JS_Crispr_2_33 | -                              |
| TATTCACAGGATGCATGGTTTCGCTCACATATGGACG    | JS_Crispr_2_34 | -                              |
| CCGAGATCACAGATGCCGAGCTCATCACCATTCA       | JS_Crispr_2_35 | -                              |
| AGACGTGTCAGGCGACAGCGGAACCAAGACAGCCG      | JS_Crispr_2_36 | -                              |
| TTCGCCGTGAAGACCCGCGAGGCGGAGGTCGCCCGT     | JS_Crispr_2_37 | -                              |
| GGCGGGTCCGCGAGATTCGTCGGCGTCGCACGGCGG     | JS_Crispr_2_38 | Anatole,<br>B22, B3, E1,<br>E6 |

|                                                     |                       |                                        |
|-----------------------------------------------------|-----------------------|----------------------------------------|
| GTGAGCTCGGGCTGAGCGTGAGCCAGACAGCGGCAAAG              | JS_Crispr_2_39        | -                                      |
| GCGAAAGAGCGATCATTCCGGGTATGGATCAAACC                 | JS_Crispr_2_40        | -                                      |
| GGGGTCTGCAACGGGGTCAGCCCAACAAGCTGACCCACTGGATCCACCACA | JS_PossibleCrispr_1_1 | -                                      |
| CTGGAGCTTGCCCTTGCGGCCACTGATCCGAAGA                  | JS_PossibleCrispr_3_1 | -                                      |
| ATCCCCGACATTCGCGCCCACCTGAATCAAGCG                   | JS2_Crispr_3_1        | -                                      |
| GCCCTGATGAGCTCCAGATCATCAAGGTGTTCCG                  | JS2_Crispr_3_2        | -                                      |
| ATCACGAGCGGCGTCACCATTGCCATCTGGATG                   | JS2_Crispr_3_3        | -                                      |
| TCGTGCCACAGGTAGGCGTCGCGGAGCTCGCCG                   | JS2_Crispr_3_4        | -                                      |
| CGCAGCACCGGCCACGACGCCTCAAGACCCACG                   | JS2_Crispr_3_5        | -                                      |
| GCCCTGATGAGCTCCAGATCATCAAGGTGTTCCG                  | JS2_Crispr_3_6        | -                                      |
| CAAAGTGTGGACTTGCCCGGACACTGACAG                      | JS2_Crispr_3_7        | -                                      |
| CCCTCGGCATTCTCGGAGGACTCGCGGGAGGCA                   | JS2_Crispr_3_8        | -                                      |
| AATCTCTATATTATTCGAATGAGTTTCATTATG                   | JS2_Crispr_3_9        | -                                      |
|                                                     |                       | B22,<br>Doucette,<br>E6, PFR1,<br>PFR2 |
| CCAGCACTGTGATCCAGGTCTGGAAGTCATTCA                   | JS2_Crispr_3_10       |                                        |
| CTGGCGCTGAGGGACACCGACGCCCAATTGTTT                   | JS2_Crispr_3_11       | -                                      |
| TCGTTGCCAGATGGACGGCCACCTCGATGCCG                    | JS2_Crispr_3_12       | -                                      |
| CTGATCGTCGCAGTCTCCGCACTGGTCGGATGG                   | JS2_Crispr_3_13       | -                                      |
| GACCATATAATGATTGATAATCTTATCATTAAAG                  | JS2_Crispr_3_14       | -                                      |
| TGCCCGTTGCATTTGCGGTGTGCGTGCGGGAAG                   | JS2_Crispr_3_15       | B3                                     |
| CGGCGGGTTCGGTGTGGTCCCCTCTTTTACGC                    | JS2_Crispr_3_16       | -                                      |
| GGTGGCTCGTGGAGCATCTCCGCCAGGGGAGG                    | JS2_Crispr_3_17       | -                                      |
| CCACTTCGGGGTGAATCCAGGCGACGCTCGAA                    | JS2_Crispr_3_18       | -                                      |
| GAACAAGCGTTTTCCGGGACGGAAGAGAATAGCC                  | JS2_Crispr_3_19       | -                                      |
| GGTGCTGCGTGATCCGCGCCGGGACTCACTCGA                   | JS2_Crispr_3_20       | -                                      |
| GGCCTCGGGGCTCAGCGAGGCGTCCAGATCGGA                   | JS2_Crispr_3_21       | -                                      |
| CATGGGAACCTCCGCGTCACCATGGGTTGAACG                   | JS2_Crispr_3_22       | -                                      |
| CTTGGGTTCCCGGTCTGCAGGTCGGTTGTTG                     | JS2_Crispr_3_23       | -                                      |
| TTTATCATTACCGTCAAGCCGCTTAATCTCAGC                   | JS2_Crispr_3_24       | -                                      |
| GGAATAATATGACACGCACATCGTTGTACAGCA                   | JS2_Crispr_3_25       | -                                      |
| TGAGCCGAAGAAGCCGCTGCAAGATTAGAGGCC                   | JS2_Crispr_3_26       | -                                      |
| ACCCCAAAAAGGTCCTGCGATTTGTACCCCTGA                   | JS2_Crispr_3_27       | -                                      |
| TCGTCCGGCGATGGCGTCGATGTGCAAGGCGGTG                  | JS2_Crispr_3_28       | -                                      |
| TCGTCCGGCGATGGCGTCGATGTGCAAGGCGGTG                  | JS2_Crispr_3_29       | -                                      |
| CCCTTCTGTGGGAGATGCCCGGCGCCGACCAGA                   | JS2_Crispr_3_30       | PFR1, PFR2                             |
| AAGTCACCCGGCGCCAGTTTGTGATTGCATCG                    | JS2_Crispr_3_31       | -                                      |
| TGATGAATGCCATCACTTCAGCGCTCGGCCCGG                   | JS2_Crispr_3_32       | -                                      |
| AGCGTCCCGGAGCCCCGTGAAGGGGCACATGC                    | JS2_Crispr_3_33       | -                                      |
| TGGCGCACATCCCTTCTGTGTCGGTGTGGTG                     | JS2_Crispr_3_34       | -                                      |
| CACAGGTCCCACTCCAGCGGCCGCGAGCCCGG                    | JS2_Crispr_3_35       | -                                      |
| TGGCGCTTCAATGTGCCGTATGCTGATTCCGGG                   | JS2_Crispr_3_36       | -                                      |

|                                    |                 |                                   |
|------------------------------------|-----------------|-----------------------------------|
| TTGGGCGGTCCGCTGGGGATCGGGCGGGCGGCG  | JS2_Crispr_3_37 | -                                 |
| GGCGTGGCCGTCTGGAAGCTCGGGGCGAAGATG  | JS2_Crispr_3_38 | -                                 |
| TCATTGCCAGGTGGACGGCCACCTCGACGCCG   | JS2_Crispr_3_39 | -                                 |
| CCAGAAAAGTTCCGCCGCGCTCAAGACTGGCAA  | JS2_Crispr_3_40 | -                                 |
| CCCTTCCGGGTCCACCGTGGCCGATTGTTGG    | JS2_Crispr_3_41 | -                                 |
| GCATCCGGGCAGACGCAGTTCAGTGTGGAGGTG  | JS2_Crispr_3_42 | -                                 |
| GAGCGCGTGGGCCTGCCAGATGTCTGCACGGAA  | JS2_Crispr_3_43 | -                                 |
| GGGCGCTGCTTATGTCGCTGTTCAGGACGCTGC  | JS2_Crispr_3_44 | -                                 |
| TATTGTCGTGGCATTGAAGAATAAGGACGGACTG | JS2_Crispr_3_45 | -                                 |
| CCAGACATGACCAGCGAAGAGATCGCCGCCGAG  | JS2_Crispr_3_46 | -                                 |
| TCTTCGGTGACGCGCCACCTGATCGAGGCCCGC  | JS2_Crispr_3_47 | Doucette<br>Anatole,<br>Doucette, |
| GCCTCAGCCATCGCATCCACCTGGGCGGCATCC  | JS2_Crispr_3_48 | E1, G4                            |
| CGGGGTGTGTGGCATGTGGCGCCGCCGGCGGCA  | JS2_Crispr_3_49 | PFR1, PFR2                        |
| CCGTGGCAGAAGGGGCGGTGCACGCCGAGGGGC  | JS2_Crispr_3_50 | -                                 |
| TTGCCGAGCTGATCTCTGCCGGCATTAGCTG    | JS2_Crispr_3_51 | -                                 |
| CCGTTCCGAAAAGTGTGGTGCATGCCCTACA    | JS2_Crispr_3_52 | -                                 |
| TGATGACGGCAGCATGATCGACGGCCAGCATCG  | JS2_Crispr_3_53 | PFR1, PFR2                        |
| CGGTGGGGCTTGATGTCATGCATGGGGGCCTCC  | JS2_Crispr_3_54 | -                                 |
| TCGCCGAGCCGCTAGAGCTGTATTTGGTGGACG  | JS2_Crispr_3_55 | -                                 |
| GGGGTGAGGATGTCGTCAGCTGGCCGTCGCG    | JS2_Crispr_3_56 | -                                 |
| CTACGGAAATGCAGGCCCGCGAATGTCTACAA   | JS2_Crispr_3_57 | -                                 |
| CGGCCGATGTGGGCCAGCGTGGTGGTCAGCGAC  | JS2_Crispr_3_58 | PFR1, PFR2                        |
| TTTCGGGCCTGACAAATTTAGCGTTCCGACCGG  | JS2_Crispr_3_59 | -                                 |
| GTGCGGATCTGGCTGCGGAATCCGACGGTGACC  | JS2_Crispr_3_60 | -                                 |
| TGGTCCAGATGAAGAACGAGATCGCCGCGGCC   | JS2_Crispr_3_61 | B3                                |
| TCCCATGTCGCCATCACAAAATCCTTTGATAGG  | JS2_Crispr_3_62 | -                                 |
| TTTCGACGCTGCCGATTTGGCGGCCGGCCTGTA  | JS2_Crispr_3_63 | -                                 |
| TTTCCGGCCACTTCGGCATCCACACGCGCAG    | JS2_Crispr_3_64 | -                                 |
| TTGATCCGGCGAAGAGGGCGGGCGATGTGGGA   | JS2_Crispr_3_65 | PFR1, PFR2                        |
| CTGGACGCCCCAGGGCAGTGGACGTAGCCAGCCG | JS2_Crispr_3_66 | -                                 |
| GGTCCTTTCAGGGTCTGGGCTCCATCGGGCTGC  | JS2_Crispr_3_67 | -                                 |
| ATGATCCCCTTTATACGGCGATGGGGATATTCA  | JS2_Crispr_3_68 | -                                 |
| TAATGTCTGCGCGCCTCCACCTACATGAGGAGA  | JS2_Crispr_3_69 | -                                 |
| TCGCCGAGGCATTGCGGGCGGTCCGGCGGCCA   | JS2_Crispr_3_70 | -                                 |
| TTCGTCAAGGAGCTCAAGGCGTCGGGCCGGTCG  | JS2_Crispr_3_71 | -                                 |
| CTCGGGCCCGCTTCGGGACGCCGCCGGGGCG    | JS2_Crispr_3_72 | -                                 |
| TTCGCCAGATTGGCGATCTTACCACGGGATCA   | JS2_Crispr_3_73 | PFR1, PFR2                        |
| CAGCGATGCCCGGTCGCTTCATAGTGATCCGGG  | JS2_Crispr_3_74 | -                                 |
| TGGTGCAGCTTGTTCCGGTTGTCGCGGGAATCC  | JS2_Crispr_3_75 | G4, E6                            |
| TGTTTTAGCGCTTCTACTCCTTCCACCTGAAA   | JS2_Crispr_3_76 | -                                 |
| AATCGCGAAGTCGGCTCTGCTGTGGCGGGGCC   | JS2_Crispr_3_77 | -                                 |

|                                           |                 |                                      |
|-------------------------------------------|-----------------|--------------------------------------|
| AGCTTCACGGCGGAGGATGCCATGGAGCAGGGG         | JS2_Crispr_3_78 | -                                    |
| CTCAACGCTCTGGTCGACGAGTCGGGGGCAATC         | JS2_Crispr_3_79 | -                                    |
| CTGGCCCGATCCTCGTCGGTGGCATCGGGATCG         | JS2_Crispr_3_80 | Doucette,<br>B22                     |
| AGGGCGGTGCCCTTCCCGAGGCGAGGGCGTCG          | JS2_Crispr_3_81 | -                                    |
| GCGGACCTGTTGCGCCAGGGGTGTGTCGGCCAA         | JS2_Crispr_3_82 | -                                    |
| GGATTGCCCACAGCACCAGCTGGTCGGTGTGAC         | JS2_Crispr_3_83 | -                                    |
| CAACATCATGCGCGGCATGTCGACGTTGAACC          | JS2_Crispr_3_84 | -                                    |
| TGCACCGCAGCATCCACAGTCTTGAGCACGATA         | JS2_Crispr_3_85 | PFR1, PFR2                           |
| TGGAGTGATGGCCTGGTCAAGGTTGACGACCAA         | JS2_Crispr_3_86 | E6                                   |
| TCCGGATTGGCGGGGGTGTTCACCACACCCGCA         | JS2_Crispr_3_87 | PFR1, PFR2                           |
| AACGCTGACGTGACCAAGCTGATGAACGTGCAC         | JS2_Crispr_3_88 | -                                    |
| CGGCACCCAATATCGCGACTATTACGGCACTGA         | JS2_Crispr_3_89 | -                                    |
| TTGGCATCGTGAACCTCGCTGATCCAGGGGATCG        | JS2_Crispr_3_90 | B3<br>Anatole,<br>B22, B3, E1,<br>G4 |
| CGAGCCGGTCGAGGGCGGTGCGGCATGAGCACC         | JS2_Crispr_3_91 | -                                    |
| GTGCTCGGGGGTGAATAGAAGCCGCTGCGGAA          | JS2_Crispr_3_92 | -                                    |
| CACCCGGTCAAGGCGGTCTGCAGCGCCACTGCG         | JS2_Crispr_3_93 | -                                    |
| GGACCCTTCAAATAGGGCGCGATGAAGATGAGC         | JS2_Crispr_3_94 | -                                    |
| CGTATCTGGCACGGCGCACAATTTTCGCGGAGTC        | JS2_Crispr_3_95 | -                                    |
| TGGTCGGCGCCGAGCCATTCGGAAGGCCGTCTCTG       | JS2_Crispr_4_1  | -                                    |
| CGCGGCCTGCAGCACTGTAACCTCCGTGTGGGCTTGCC    | JS2_Crispr_4_2  | -                                    |
| TCCAAGAGCTTCAGATACTTCTCGTTCGTGACGTTT      | JS2_Crispr_4_3  | -                                    |
| CGACATTCGTGCTATGGTGTGTCATTCGTGGGCGCGC     | JS2_Crispr_4_4  | PFR1, PFR2                           |
| GACTGAATGGCGTCGAAATCCTCGAACATCTCGT        | JS2_Crispr_4_5  | PFR1, PFR2                           |
| CACACCGTTAATCGTCAGAATACGTACAAGATGACG      | JS2_Crispr_4_6  | -                                    |
| GCCGAGCGCGTGGCAGCATATCAGCTGATCTCGGATGCCAA | JS2_Crispr_4_7  | -                                    |
| GCCTTTTTGGGACAGTTTGGTGTAGATTATGAAG        | JS2_Crispr_4_8  | -                                    |
| TGTCTTGAATCTCGAGCTCGGAGCCGATATCAAGCCCA    | JS2_Crispr_4_9  | -                                    |
| GCTCGGTGACGCCGCCCTGGCGATGCTGCCGACCG       | JS2_Crispr_4_10 | -                                    |
| GGGGCTGACGTTCTCCGTTGACGGCCAGCACAAA        | JS2_Crispr_4_11 | -                                    |
| GTGTTTGAACCGGTGACAGGGTCATCACCTTGAC        | JS2_Crispr_4_12 | -                                    |
| AAGAATGGCGCGACCGTACGCCGCAACGGGCTGGG       | JS2_Crispr_4_13 | -                                    |
| ATTTATGTTTTTCTCTGGTGATTTCTGCCGCCGCGA      | JS2_Crispr_4_14 | -                                    |
| GAGAGTGATTAGGACCCAGCTGTGTAGCGGGGCCGCTC    | JS2_Crispr_4_15 | -                                    |
| CGTTTTAAGTCTGAGACTTGACCCACGGTGTGGGTGCGA   | JS2_Crispr_4_16 | -                                    |
| CTGAAGGGGAGTACAGACATTGGTAAGCTCCTTATG      | JS2_Crispr_4_17 | -                                    |
| GCAGGAACAGACTCGCGCTTGGTATCCAATCGACCA      | JS2_Crispr_4_18 | -                                    |
| GCTTCCGTTGGTGAACACCATTTTGGTTTGATTCCACTC   | JS2_Crispr_4_19 | -                                    |
| TCGTCGTGGGCGCCGGGCACGTCCATCTATCTGGCAAA    | JS2_Crispr_4_20 | -                                    |
| TCGGCATGATGCCAGCGCCGATTATCGTGAGCGTATT     | JS2_Crispr_4_21 | -                                    |
| AAGATGAGCGGGCCGAGGGTTTCGACCCGGGACGCGG     | JS2_Crispr_4_22 | -                                    |

|                                                      |                        |            |
|------------------------------------------------------|------------------------|------------|
| GTGAGCTCGGGCTGAGCGTGAGCCAGACAGCGGCAAAG               | JS2_Crispr_4_23        | -          |
| GCATTTGCTTGCCATTGCTTCTCCAATCTGCGT                    | JS2_Crispr_4_24        | -          |
| CGCACCAAGGCCCGGCTCGGGGAGGGACGGTTGCCGT                | JS2_Crispr_4_25        | -          |
| CGCACCAACCGCAAGGCGACG                                | JS2_PossibleCrispr_1_1 | -          |
| AAGCCGGCAGCGAAGAAGCCAGCA                             | JS2_PossibleCrispr_1_2 | -          |
| GGGGTCTGCAACGGGGTCAAGCCAAACAAGCTGACCCACTGGATCCACCACA | JS2_PossibleCrispr_2_1 | -          |
| CTGGAGCTTGCCCTTGGCGGCCACTGATCCGAAGA                  | JS2_PossibleCrispr_5_1 | -          |
| GGTTTGATCCATACCCGGAATGATCGCTCTTTCCG                  | JS4_Crispr_1_1         | -          |
| AATACGCTCACGATAATCGGCGCTGGCATCATGCCGA                | JS4_Crispr_1_2         | -          |
| CACCCGAGAGGCAGCACCAGGCCGAAGCGCGCCGACAT               | JS4_Crispr_1_3         | -          |
| TTTTGCCAGATAGATGGACGTGCCGGCTCCACGACGA                | JS4_Crispr_1_4         | -          |
| GAGTGAATCAAACCAAAATGGTGTTCACCAACGGAAGC               | JS4_Crispr_1_5         | -          |
| CTGTCAAATGGCGTGAGGTGAGCGCGGTGCAGG                    | JS4_Crispr_1_6         | -          |
| TGGACCTGCTCGATAAATAAGCTCGATCAGGCCCTG                 | JS4_Crispr_1_7         | -          |
| CCGATCCTGTGGCCGAGGCCGGACCTGAAGCCT                    | JS4_Crispr_1_8         | -          |
| TGCGTAGGGTGGGTCTCTGCGATCTGATCGGGCT                   | JS4_Crispr_2_9         | -          |
| TCGTCGGTGATCAGGTGCAGCGAATCGGTGTCGCA                  | JS4_Crispr_2_10        | -          |
| ACCGAGAACGTTACGCAACGGCCAGCCGATGATGAC                 | JS4_Crispr_2_11        | -          |
| TGCCGTGTGGGGCGGTGGTGGTGTGCCTCCCAAT                   | JS4_Crispr_2_12        | -          |
| AACCACAGCTACGTCTTCCGGTGTCCGGCGCGGATA                 | JS4_Crispr_2_13        | -          |
| TCCATGTGCCAATGTCAATGTGAGCGACATCGCG                   | JS4_Crispr_2_14        | -          |
| CAGAACAACGCTGGAGGAAAGTGTCCCAATCTCATG                 | JS4_Crispr_2_15        | -          |
| GCGAATGTCAGGGATCGGGTCTTGAACGCCACCGAT                 | JS4_Crispr_3_1         | -          |
| CAGCCCCAACCCTCGACCTCACTCGACGCCAT                     | JS4_Crispr_3_2         | -          |
| ACGAGCCAGCGAATACCACTGGCCGCGATTGGGGTTGAT              | JS4_Crispr_3_3         | -          |
| GGCCTGCGCCTGGGGGTGCCCCCGCGCATGAAGTG                  | JS4_Crispr_3_4         | -          |
| ACCTGGACAGTGCGGGTGTCTTGCCACCCAGCTT                   | JS4_Crispr_3_5         | -          |
| ATGCGCGCATTGGCGCAGAACTTGAAATGCTTGGACGT               | JS4_Crispr_3_6         | PFR1, PFR2 |
| AGGCGCCTGTGGTGACACCGCGATCACGAGCCAGCGA                | JS4_Crispr_3_7         | -          |
| CGACCTCACTCGACGCCATGCACACACCCACAG                    | JS4_Crispr_3_8         | -          |
| AACGGCAAGGAGCAGATCCTCGCCAAGAAGCTTGGCGCA              | JS4_Crispr_3_9         | -          |
| TCGAACGCTTACTCCTGGTTTCCACGGGAACCTCGCG                | JS4_Crispr_3_10        | -          |
| TTTGCTTACTCAGGGCTTGTCTCTTTTGGTCGTTTTGC               | JS4_Crispr_3_11        | -          |
| TCCCCGACGATCGCCGGAATGGTCAACCGCTTCGGATGC              | JS4_Crispr_3_12        | PFR1, PFR2 |
| TTATGGCGCTGCTTGGGACGCCGCTCAGATCGCCGCT                | JS4_Crispr_3_13        | -          |
| CGTTCTCGTGCTGAGCTACGGCATAACGGGGTGTG                  | JS4_Crispr_3_14        | -          |
| AGTCGGGTGTAATCATTGACCTCCGCACCCGGCAAGCA               | JS4_Crispr_3_15        | -          |
| CGTCCATGTGTGAGCGAACCCACGCATCCTGACT                   | JS4_Crispr_3_16        | -          |
| ACTTCGAGGATGCCGGCGAGGAAGCCGGTAGGAGT                  | JS4_Crispr_3_17        | -          |
|                                                      |                        | Doucette,  |
| GCGATCTCGGCGCTGGTGGGGCGTTCTCGATTGC                   | JS4_Crispr_3_18        | G4         |
| CAGATGAGCGAACTGGATTTTACCAATTGCTAGATG                 | JS4_Crispr_3_19        | -          |

|                                          |                        |                                                           |
|------------------------------------------|------------------------|-----------------------------------------------------------|
| CGGAGCCAATCGACATCGCCCGGAAGGTTAGCGAGAAA   | JS4_Crispr_3_20        | Doucette,<br>E6                                           |
| CGGCATCATGTGATCACCCGACCCATGACCTGCTCCCACG | JS4_Crispr_3_21        | -                                                         |
| CGTACTCATTGTGTTTCTCCTAGAACTTTAACGT       | JS4_Crispr_3_22        | -                                                         |
| GGTGAGAATCCCGTCGCCCGTACCGGGCGGAGCGTGA    | JS4_Crispr_3_23        | PFR1, PFR2                                                |
| GGTCATAGGTCGGATTATATCCGCCCATGTGATTA      | JS4_Crispr_3_24        | -                                                         |
| CTTGATATTGGGTCTGAGCTTGAGATTCAAGATATCAA   | JS4_Crispr_3_25        | -                                                         |
| CTGTGCAGTCCGTCTCCACCGTGAAGCCGACAA        | JS4_Crispr_3_26        | -                                                         |
| AATCCGGACCAGTAATGTCAGGAATCTTGATCTT       | JS4_Crispr_3_27        | -                                                         |
| CACGCGCTCAGGGTGAGGGCCCGTGGGATGGCTGGGT    | JS4_Crispr_3_28        | -                                                         |
| CATTACTCATCGTGTCTCCCTAGAACTTTAGTGT       | JS4_Crispr_3_29        | -                                                         |
| CGGCTCGTTCACCGCATCCTTCGGGGGTGTCGGGGCAG   | JS4_Crispr_3_30        | -                                                         |
| GGCAGCCGCGATGGCTCTGGTTGTCTTGCGCATGCAA    | JS4_Crispr_3_31        | -                                                         |
| TTCAAGAATTTTGTGAACTTTTGTGATTTCTACA       | JS4_Crispr_3_32        | -                                                         |
| CCGAATCGACGTAGACAAGCCAGGTCTTCTTTCCGG     | JS4_Crispr_3_33        | -                                                         |
| ACGCCCCCAGACAAAGCCGAACCTAGCGGAACCTTGACC  | JS4_Crispr_3_34        | -                                                         |
| ATTGCCATTGCTGCATCCCGCCAAGGGTGTGCGTA      | JS4_Crispr_3_35        | E6                                                        |
| TGCCGGCTTGCCGTGGACGCCGT                  | JS4_PossibleCrispr_4_1 | -                                                         |
| TGCCGGCTTCTTGCCGCCGGCTT                  | JS4_PossibleCrispr_4_2 | -                                                         |
| CGTCGCCTTGCCGGTGGTGGC                    | JS4_PossibleCrispr_4_3 | -                                                         |
| TCAAGGAGCGCGTGGAGCCCCGCTTCCGCTCCAG       | JS4_PossibleCrispr_5_1 | -                                                         |
| ATCCCCGACATTCGCGCCACCTGAATCAAGCG         | JS7_1_Crispr_2_1       | -                                                         |
| GGGACGAGCGCGGTGCGCTGCGCAACCTTGGC         | JS7_1_Crispr_2_2       | -                                                         |
| ACCGACGAAAATAATTCGGAAGTTCCTATTATC        | JS7_1_Crispr_2_3       | -                                                         |
| TGGCTCGTCAAGGACCTGATCTCCGTCGAGGAC        | JS7_1_Crispr_2_4       | Anatole,<br>B22, B3, E1,<br>E6, G4                        |
| CCTACAAGCCGCGCGCCGGTACTGGGCTGTGC         | JS7_1_Crispr_2_5       | -                                                         |
| AGATTCAGCGAGTCAATCGCGTCGTGGGCGGCC        | JS7_1_Crispr_2_6       | Anatole,<br>B22, B3, E1<br>B22, G4,<br>PFR1,<br>PFR2;PJS7 |
| ATGCGGGGCTGCACCTGCTGGCGTTGCAGGCC         | JS7_1_Crispr_2_7       | -                                                         |
| TGCGATAGGGCTCCAGGCTGAGCGCCGCGGAG         | JS7_1_Crispr_2_8       | -                                                         |
| GCTGAATGGTGATTTCACTTTGCCTCCAAG           | JS7_1_Crispr_2_9       | -                                                         |
| TCGGCGTGCCGGGCTCCACGCTCACGGGCACGC        | JS7_1_Crispr_2_10      | E6                                                        |
| CGCGTAGACGTCGGGCGGCAGGGCCTCCTTGGCC       | JS7_1_Crispr_2_11      | -                                                         |
| CAGTCAACAGTAATTTAGTCCCCAGCGATCG          | JS7_1_Crispr_2_12      | -                                                         |
| CCACGATGAACACCGAGATCGCCGTCGAGATCG        | JS7_1_Crispr_2_13      | -                                                         |
| CCGGGTCGGGCGACCCTGCTGGGTGCGGCGGCG        | JS7_1_Crispr_2_14      | -                                                         |
| CCTGTCCGTCCTGCCACGTGTGTTGTGGCATTG        | JS7_1_Crispr_2_15      | -                                                         |
| CTATGAATATTAATCCAAGGATTTGCTACTCA         | JS7_1_Crispr_2_16      | -                                                         |
| TCGGAAGTCCGTTCCGGCGATTCGAGCCGCC          | JS7_1_Crispr_2_17      | -                                                         |
| TACTTGAAAGCCACGAACTGAACCCAGAATAA         | JS7_1_Crispr_2_18      | -                                                         |

|                                    |                   |                                 |
|------------------------------------|-------------------|---------------------------------|
| TCGGAGGAAGGCAACAGGCTAAATCCTGATCTT  | JS7_1_Crispr_2_19 | -                               |
| GGCGGATAGCCGTCGGCGTAATCGCTGGTCCA   | JS7_1_Crispr_2_20 | Anatole, B3,<br>Doucette,<br>E1 |
| CATGGCGGACGGTGTGGTGGATGCCGACTGGG   | JS7_1_Crispr_2_21 | Anatole, B3,<br>E1              |
| CGCCGGTCGGGATGGTTTCGAGGTCGCGGACTG  | JS7_1_Crispr_2_22 | -                               |
| TCTCGGTTCCGGTCTGCAGGTCGGTTTGTG     | JS7_1_Crispr_2_23 | -                               |
| GTCAACTTGTCGCCGCCGGTGATCAGTTTGACC  | JS7_1_Crispr_2_24 | -                               |
| GGCGGGGACCCAGCGTCGTCCTGGACGAATAC   | JS7_1_Crispr_2_25 | -                               |
| CACCCCCACCGTCGCGGAGCGCCACACGATCGA  | JS7_1_Crispr_2_26 | -                               |
| GCAAGGGCTGCTGGAGACGGTCGCCTTCGCGAA  | JS7_1_Crispr_2_27 | Anatole, B3,<br>E1              |
| CGAACATCGTCATCGGCTGGCCGTTGCTGAACG  | JS7_1_Crispr_2_28 | -                               |
| GGGCTCCATCGGGCTGCTCCCGGTGGGGCCTC   | JS7_1_Crispr_2_29 | -                               |
| ACCCAATCGCGGCCAGTGGTATTCGCTGGCTC   | JS7_1_Crispr_2_30 | -                               |
| GGTTTTTCATGGCTGGAATCCTCCGACCCGAC   | JS7_1_Crispr_2_31 | -                               |
| CCGGTCATGATGCCTCCGAATTGTAGACGTTG   | JS7_1_Crispr_2_32 | -                               |
| CATCCAGAAGCTGTTGCCCATCTTCGCGGACAC  | JS7_1_Crispr_2_33 | B22                             |
| CATCGGGCTGCTCCCGGTGGGGCCCTTCTTGC   | JS7_1_Crispr_2_34 | -                               |
| CACGCCGACCAGGGTCACGGCCAGCGCCGCCCA  | JS7_1_Crispr_2_35 | -                               |
| CCCTGATGTGATGGTGCCGCCACGCCGCTGG    | JS7_1_Crispr_2_36 | -                               |
| CACCCAGTTCGAAACCGAAACGCCGTACAGCAAG | JS7_1_Crispr_2_37 | -                               |
| CGACTCGTCTGCCAGGATCCGTGCACAGATCGA  | JS7_1_Crispr_2_38 | -                               |
| ACATCCCACAGTCGGTGTCTGAGGTCGGAACG   | JS7_1_Crispr_2_39 | -                               |
| CTCGACGGCGATCGAGCCGCTTGTCTCGGCGG   | JS7_1_Crispr_2_40 | -                               |
| TCGTAGGCCTGTCGCAGTTCCGAGGCTTGACC   | JS7_1_Crispr_2_41 | -                               |
| TGTGGTCAAGTTCGGCAGCGACGCGGTGAATTCC | JS7_1_Crispr_2_42 | -                               |
| ACAAGACCCTTGCCAGATCACCAGTGCGGTTG   | JS7_1_Crispr_2_43 | -                               |
| ACCGGACCCAGCCGCCAGATTGTGGGGGCGC    | JS7_1_Crispr_2_44 | -                               |
| CGACTGTCGAAACGTGATCGCCCTGGCGATCC   | JS7_1_Crispr_2_45 | -                               |
| CGACTTCCCGCAAAGGTCAGCCTGTCTCCGAGC  | JS7_1_Crispr_2_46 | -                               |
| TTAGAGTTTGTCTGACAGCTACGTGGACCCAG   | JS7_1_Crispr_2_47 | -                               |
| CCAAGCCCGAAGGCGGTGCCCTTACCGCCGCA   | JS7_1_Crispr_2_48 | -                               |
| TCGGGTCAGCGATCGCCGCTCCGTTTTCTGGGA  | JS7_1_Crispr_2_49 | -                               |
| TTTCCCGCCACTTCGGCATCCACACGCGCAG    | JS7_1_Crispr_2_50 | -                               |
| CATGGATCCCTGTGCGGAATTCAGGCTTGGTC   | JS7_1_Crispr_2_51 | -                               |
| CTGAATGCCCCAAGGGGACCTCGATCCCGTCC   | JS7_1_Crispr_2_52 | -                               |
| CCCTTGATCTCGGTGTCCACATCGTCGAGGGCC  | JS7_1_Crispr_2_53 | PFR1, PFR2;<br>PJS7             |
| CGCCGATGCCGGAATCACCAACGTCTCGACCCAG | JS7_1_Crispr_2_54 | -                               |
| AGATCGGCGCGATCTGGGCGCCCGTGCGGATC   | JS7_1_Crispr_2_55 | -                               |
| CAAGAAGAGCGGACCGGCTGGCGGCCATTCCG   | JS7_1_Crispr_2_56 | -                               |
| TGCTCCGCATTTGATCTTGTGAGGCTCCACAGA  | JS7_1_Crispr_2_57 | -                               |

|                                         |                          |                                                                |
|-----------------------------------------|--------------------------|----------------------------------------------------------------|
| CGGGTCTGCGTCTCACCTTCTGTAGGCCCAA         | JS7_1_Crispr_2_58        | -                                                              |
| TCACCGGGCTGCATCCACACCGGCGGCCACCCAG      | JS7_1_Crispr_2_59        | PFR1,PFR2                                                      |
| TTGTCCGGTTAGACCAGACGGGAATGTTCAATC       | JS7_1_Crispr_2_60        | ;PJS7                                                          |
| ATCGTCCCACACCGCCGATTTCTGGGGTCAAGG       | JS7_1_Crispr_2_61        | -                                                              |
| CCCCCGGTGGGCATCCAGAAGCTGGGACGAACG       | JS7_1_Crispr_2_62        | -                                                              |
| TTCCTCCTGCCCCGCTGGTGTGCTGTGGCTG         | JS7_1_Crispr_2_63        | -                                                              |
| CGTGTGCATGCAGACCAATGTGGCTGCACGTGCG      | JS7_1_Crispr_2_64        | -                                                              |
| TTGTCTTTCTCGTCTGACTGTTGTTGCAGTGTC       | JS7_1_Crispr_2_65        | -                                                              |
| CGCACCACCCGCAAGGCGACG                   | JS7_1_PossibleCrispr_1_1 | -                                                              |
| AAGCCGGCGGCCAAGAAGCCGGCA                | JS7_1_PossibleCrispr_1_2 | -                                                              |
| ACGGCGTCCACGGCCAAGCCGGCA                | JS7_1_PossibleCrispr_1_3 | -                                                              |
| CTGGCCAGAAACCTCTACCCCGAGCCCCTTGA        | JS7_1_PossibleCrispr_3_1 | -                                                              |
| CTGGCCAGAAACCTCTACCCCGAGCCCCTTGA        | JS7_1_PossibleCrispr_4_1 | -                                                              |
| CCGCGGACATAGACCGGCCATTCCGAAGCCACA       | JS8_Crispr_3_1           | -                                                              |
| ACAGAAACGGTCTTGGTGCATGTTGCTGTCTCTC      | JS8_Crispr_3_2           | -                                                              |
| CTAAAACGGGACTGCTTGGCTGGTATGATGAAT       | JS8_Crispr_3_3           | G4, PFR1,<br>PFR2                                              |
| ATGTCATCTGCCACCGCACCTGCTGGGCAATCGA      | JS8_Crispr_3_4           | -                                                              |
| AGTGTTACGTGTTGAAGGGTCCAGCCCTTCACGAA     | JS8_Crispr_3_5           | -                                                              |
| TTCTCAAAGGCCGCTTTTGAGCTGACTTTTCAGGGGGCG | JS8_Crispr_3_6           | -                                                              |
| CCGCCGCCCTTACACGGGTGGCCGGTGTGTGGTAAA    | JS8_Crispr_3_7           | -                                                              |
| TTCCACGTCCAGGCTCTGTGCCGCGAGCATTTCCAGCT  | JS8_Crispr_3_8           | phiB5                                                          |
| CGCTCGTGCGACCGCTGCGGGAAGCCCATTTTCGACG   | JS8_Crispr_3_9           | -                                                              |
| TCACCGCGCTCTGACAAGGCCCGATACTTTGCCCCG    | JS8_Crispr_3_10          | B22,<br>Doucette,<br>E6<br>Anatole, B3,<br>Doucette,<br>E1, E6 |
| GGCGTGCAGCAGTCACTGCGCAAGTGGGGCGTCGGGA   | JS8_Crispr_3_11          | -                                                              |
| CGCGAGCGAGCCAAGGCCGAGGCCGACCGCTTCACAAA  | JS8_Crispr_3_12          | -                                                              |
| TGTCGGTCATGATCCTGGTCCTTTTCAGGGTCTGGGCT  | JS8_Crispr_3_13          | -                                                              |
| CTTCTCCACCCGCGGCCAGGCCATCGCCTCCATCAC    | JS8_Crispr_3_14          | -                                                              |
| TTTGTGTGGCACCGTGTGCGACACCAGCGTCCGGCA    | JS8_Crispr_3_15          | -                                                              |
| CGAGCTCTCGTCCCTGCAGCTCGACGCGCTGGTCAA    | JS8_Crispr_3_16          | -                                                              |
| AGGTGCCACATCAGCCAGAAGCCCAGCAGCCGCTGCA   | JS8_Crispr_3_17          | -                                                              |
| TCGGCGCGGGCATTGGTACTGCACCTCCGGCCTCGAT   | JS8_Crispr_3_18          | -                                                              |
| TCCCATGTCATCAGAGGATCCTTTGGTAGGACAGGGT   | JS8_Crispr_3_19          | -                                                              |
| TTGCCGACCAGCCCAGGCGACCCAGGTATTACGA      | JS8_Crispr_3_20          | PFR1, PFR2                                                     |
| TTCACCTGAAGCCCAGGCGCTCCCGGATCCGGATC     | JS8_Crispr_3_21          | -                                                              |
| TCTGAACCGCCGATAAGCACGGCCAGCCACCCGGA     | JS8_Crispr_3_22          | -                                                              |
| GAGCTGATCGGCAAGGTCCCGACGCCCCACTTGCG     | JS8_Crispr_3_23          | Anatole, B3,<br>Doucette,<br>E1, E6                            |



|                                             |                        |              |
|---------------------------------------------|------------------------|--------------|
| GACGCCGCCGAAGACCGCGCAATCGACATCCTCCAC        | JS8_Crispr_3_24        | -            |
| ACTCCTTCTCGATAGTTCCTTGCCGGTCGGCCCTC         | JS8_Crispr_3_25        | -            |
| TTATCCGTTTTCGACTGTCGCCACCGACTGCACCGGGAT     | JS8_Crispr_3_26        | -            |
| CGCGTCCGGATGCCGGGGTCACCCGTCAAACCAA          | JS8_Crispr_3_27        | -            |
| TCCCACCACGCTGGCGATCCAGCCTTCGACCATGCA        | JS8_Crispr_3_28        | -            |
| TAATCTCCTCTGTAGGTGGAGGGACGCAGATCATA         | JS8_Crispr_3_29        | -            |
| CGGTGAGCTCCCTGACCCGCTAGATTTCTGTGAGC         | JS8_Crispr_3_30        | -            |
| GTGGGCGACGGGGTCGCGAAGAACCGTGGCTTCAAC        | JS8_Crispr_3_31        | -            |
| GCTGATCATCCAGCTGGTCGGCGGGATTGTCGGG          | JS8_Crispr_3_32        | -            |
| CAGGCGATCCGTCTGTGGAAGACTCGAACGGCCA          | JS8_Crispr_3_33        | -            |
| GGTGGTAATTCGATTGGTTTCCACCGTTTGATAA          | JS8_Crispr_3_34        | -            |
| GACATGGATGGCGTGATCCGTGACTATGTGGCAGC         | JS8_Crispr_3_35        | -            |
| AATTCTACGGAGAACAGCAAGAATAATGGGTCGCT         | JS8_Crispr_3_36        | -            |
| GGGAGGGCGAGGCTCGAAGCGATGACAGCACTCGCCT       | JS8_Crispr_3_37        | -            |
| CCTGTTTTCGGGGCGCTTGAGGGCACGACACTTTCGA       | JS8_Crispr_3_38        | -            |
| AGGCGGAAGCGCCACCATGCGACCCCGTCACCCCG         | JS8_Crispr_3_39        | -            |
| AGGTCGCAGCTGCCGGTGATCTTGCCGAGGGTCTTGG       | JS8_Crispr_3_40        | -            |
| GAGCGTTGCCAGGCGGTGAAGGCTTTGTTGTCGCCGT       | JS8_Crispr_3_41        | -            |
| GTCGAATCAGGGAAGTAGGCGTTCGTTGCCGTTTCA        | JS8_Crispr_3_42        | -            |
|                                             |                        | E1, Anatole, |
| GTGCCATGTGGACCCCTCACCCGACAAATTTCTC          | JS8_Crispr_3_43        | B3           |
| CGGGCTGCTGGGTGTCGGGGTCCGGGTCGTCGACGG        | JS8_Crispr_3_44        | -            |
| GCCAACCAGCCGGGATAGGCCCGAAAAACGACCCAGG       | JS8_Crispr_3_45        | -            |
| GCCAACCAGCCGGGATAGGCCCGAAAAACGACCCAGG       | JS8_Crispr_3_46        | -            |
| GACGACTCAAAAATTGCGCACCCACTGGATCACCT         | JS8_Crispr_3_47        | -            |
| GTCGGAGAGGTGTCCGGTGACCAGGTGACAACCGA         | JS8_Crispr_3_48        | -            |
| GCTTCCGTTGGTGAACACCATTTTGGTTTGATTCCACTC     | JS8_Crispr_3_49        | -            |
| TCGTCGTGGGCGCCGGGCACGTCCATCTATCTGGCAAA      | JS8_Crispr_3_50        | -            |
| AAGATGAGCGGGCCGAGGGTTGACCCGGGACGCGG         | JS8_Crispr_3_51        | -            |
| TGATGCCCCAGGCCGGCGCGCAACTGCTCACCGAGCTG      | JS8_Crispr_3_52        | -            |
| AGGCGCAAGGGAATGCGCTTCTACAACCGCGTCACGCTG     | JS8_Crispr_3_53        | -            |
| GTGAGCTCGGGCTGAGCGTGAGCCAGACAGCGGCAAAG      | JS8_Crispr_3_54        | -            |
| AACCTGTGGGGCTTCCCGTTGTCGTCACGACCGC          | JS8_Crispr_3_55        | -            |
| CGCACCAAGGCCCGGCTCGGCGAGGGACGGTTGCCGT       | JS8_Crispr_3_56        | -            |
| GTCATGGTGTGCGCACAGAAACCTAGAGTACGGGCGG       | JS8_Crispr_3_57        | -            |
| GCGAAAGAGCGATCATTCCGGGTATGGATCAAACC         | JS8_Crispr_3_58        | -            |
| CTGGGGGTAGCCGGGCTGGCCTTGGGGGTAGGTGCC        | JS8_PossibleCrispr_1_1 | -            |
| GGTGAGCTACCACGCCAGCCGCTGGCCTGGGCGCCG        | JS8_PossibleCrispr_2_1 | -            |
| CTGGCCAGAAACCTTACCCCGAGCCCTTGA              | JS8_PossibleCrispr_4_1 | -            |
| ACTGCACCGTCGGATCAGCCGATAACCATTACCCGGCCCCGAA | JS8_PossibleCrispr_5_1 | -            |
| TCCTCAAAGCGGAGATAAGCATCCTTGTCGAGC           | JS9_1_Crispr_2_1       | -            |
| CCACCCAGGGGAGGTTGGCAGCTGGGATGCAGC           | JS9_1_Crispr_2_2       | -            |
| TCCAAATCGGCGCGCTTCTCCACATCGCTCCAG           | JS9_1_Crispr_2_3       | -            |

|                                    |                   |                                    |
|------------------------------------|-------------------|------------------------------------|
| GCAGCGAGTGCCGAGCTGCACCAGCTCGCCGCA  | JS9_1_Crispr_2_4  | -                                  |
| GACATCTGCGAGGCGGGTGTTCAGTGCCGCCTG  | JS9_1_Crispr_2_5  | -                                  |
| AACCTGTCCGAGCAGCGTCTCAATCTCGCGGCC  | JS9_1_Crispr_2_6  | -                                  |
| GCAACGTCCTGATAGGCCTTGCTGGCGAGGTTG  | JS9_1_Crispr_2_7  | -                                  |
| CTTGCTGCTGCCTCGATAGCTTCCGCCGCGACC  | JS9_1_Crispr_2_8  | PFR1, PFR2                         |
| CGGCTCCGAGGATCCGCTTCGGCGTGTGGTGG   | JS9_1_Crispr_2_9  | -                                  |
| TTCTCACGATCTTCAGCGGCCTTCTGCTTAGCG  | JS9_1_Crispr_2_10 | -                                  |
| TAGACCTGCCATTGCCGGTGACCTTCGGCGTC   | JS9_1_Crispr_2_11 | -                                  |
| ACCATTTCCGCAAGTGCCTCAAGGGTGACGTCC  | JS9_1_Crispr_2_12 | -                                  |
| ATTGTAGCCGGCTGGCTGATTTTGTAGTTGACGA | JS9_1_Crispr_2_13 | -                                  |
| CTCGTATTGCGCATGACGTGGGTCCTTGAATCG  | JS9_1_Crispr_2_14 | -                                  |
| TTGAAGGCCAAGGCATTCCCTTGGAGCGACTTG  | JS9_1_Crispr_2_15 | -                                  |
| TTAGTGCATTGCGGGCAGATGTCGCGCTTGCCG  | JS9_1_Crispr_2_16 | -                                  |
| TTCCGAGGCGATTGCTGGCCGTGCTGCGTGAC   | JS9_1_Crispr_2_17 | PFR1, PFR2,<br>G4                  |
| TTCGAAAAAAGATGGCCCAACACTTGACATG    | JS9_1_Crispr_2_18 | -                                  |
| CGAGAACTCGAAGACCTTGAGCTTGCAGCTCG   | JS9_1_Crispr_2_19 | -                                  |
| CATGCGGGCATGACGGCCATCAAGCCGGTGAGC  | JS9_1_Crispr_2_20 | -                                  |
| GGCGAGCAGGCCACGAGAACTGTGCACGCGG    | JS9_1_Crispr_2_21 | B3                                 |
| AGGCGGCCAGTGGTTCGGTGAGGCAGATGTCG   | JS9_1_Crispr_2_22 | B22                                |
| GGACGCTGCTCTGGGCGCTGCTCGGGGCGCTGC  | JS9_1_Crispr_2_23 | -                                  |
| CATCCGGCTCAATCAGGTGAGCCTCCGACAAAC  | JS9_1_Crispr_2_24 | -                                  |
| TTGAGACGGCCAAGAACGAGATCAACACCTCTG  | JS9_1_Crispr_2_25 | -                                  |
| GCATCAAGAATATCCGAAACCGCCCTTTTCAG   | JS9_1_Crispr_2_26 | -                                  |
| CGTCGTTGATGCGGGCTATCGGGGTTTGACGA   | JS9_1_Crispr_2_27 | -                                  |
| TTTGGGGTGGATGGTCGCTGCCCTGGCTGCGG   | JS9_1_Crispr_2_28 | phiB5                              |
| GTTGTGGGTGCTCTGGTGGTCGTGGGTGTCGGG  | JS9_1_Crispr_2_29 | phiB5                              |
| GTTGAATAGAACTCAAAGAATGTTTGATCCTCA  | JS9_1_Crispr_2_30 | -                                  |
| TTGTCCGGCTCGACGAGACGGGAATGTTCAATC  | JS9_1_Crispr_2_31 | -                                  |
| GGGACTTCATGGTGATCTCCTCTCAGCCGTTG   | JS9_1_Crispr_2_32 | -                                  |
| CGTTGTGGGTGCTCTGGTGGTCGTGGGTGTCGGG | JS9_1_Crispr_2_33 | phiB5                              |
| CTGCCGAGCTGATCTCCGCCGGCATCCAGCTG   | JS9_1_Crispr_2_34 | B3                                 |
| TACCACATTTCTAGGCAGAGGCCGGGGGCGTCA  | JS9_1_Crispr_2_35 | -                                  |
| GAGGCTGGTCGTCCGGTGCTTTCAACGGTGCGG  | JS9_1_Crispr_2_36 | -                                  |
| TTCGGGGGTGTCCGTGGATGACATCACCGAGC   | JS9_1_Crispr_2_37 | -                                  |
| GAGTTGCGGAAGCTGACTGTCTTTGAGTTCTCG  | JS9_1_Crispr_2_38 | -                                  |
| ATTGAGCATGTCCATGATTCGTGTCCTCACTTG  | JS9_1_Crispr_2_39 | -                                  |
| CGCTTCAACGGAGTGGCGAGCGTCGCCGGTTCC  | JS9_1_Crispr_2_40 | -                                  |
| CTCTGGACACCGGTTGGACACCGTTTGGGACG   | JS9_1_Crispr_2_41 | -                                  |
| TGGCTCGTCAAGGACCTGATCTCCGTCGAGGAC  | JS9_1_Crispr_2_42 | Anatole,<br>B22, B3, E1,<br>E6, G4 |
| ACAGCCGAAACCGACAGGGAGGTGCGGGCATCG  | JS9_1_Crispr_2_43 | -                                  |

|                                   |                   |                             |
|-----------------------------------|-------------------|-----------------------------|
| GTCCCAGTCGGTCAACGGCGCTTCGGTGAATTA | JS9_1_Crispr_2_44 | -                           |
| CTCCCCGTGGACCGTCGACGCGCTATCCATATG | JS9_1_Crispr_2_45 | -                           |
| TCGTCGGCGTGCTCGATGCCGATCGAGGTCAGG | JS9_1_Crispr_2_46 | Anatole, B3,<br>E1          |
| TGCTCGATGCCCTCCACGTGGATCGGTCCGTCC | JS9_1_Crispr_2_47 | -                           |
| CCCGTAAACCAATCAATGACTGGTTGGATGATG | JS9_1_Crispr_2_48 | -                           |
|                                   |                   | B22,<br>Doucette,<br>E6, G4 |
| AGGCCACGGAGTTCGCCATGGCCGAGGTGATCG | JS9_1_Crispr_2_49 |                             |
| TCCCGGCGGAGACATCACCATCGCGTGCAGGAC | JS9_1_Crispr_2_50 | -                           |
| GCCCTCGGCGCGACGCTGATCGGCGTCCCACTG | JS9_1_Crispr_2_51 | -                           |
| CAGTCGGGCAGCTCGGTGGCGTCGAGCCATTCC | JS9_1_Crispr_2_52 | -                           |
| CGGCCGATGTGGGCCAGCGTGGTGGTCAGCGAC | JS9_1_Crispr_2_53 | PFR1, PFR2                  |
| CAGTGGCCACGGACCATGAATCGCACGGTGAGC | JS9_1_Crispr_2_54 | -                           |
| GTTTGGCAACCGCGCAAGCAACGTCGGGGCCGT | JS9_1_Crispr_2_55 | -                           |
| CATGAATCGCACGGTGAGCTTGTGCCCGGTGCC | JS9_1_Crispr_2_56 | -                           |
| TTAGTCAACAAGTACAACGACATTGCCGGGATG | JS9_1_Crispr_2_57 | -                           |
| GCTCGGTTCTTTGGCCCGCGTAGAAGACGGCA  | JS9_1_Crispr_2_58 | -                           |
| TGGGTCGCCGCCTTGATAGCTTCCCCCGCAGCC | JS9_1_Crispr_2_59 | -                           |
|                                   |                   | Anatole, B3,<br>E1          |
| TATGTCTTCGGTGTCGGCGTGCTATTACGCG   | JS9_1_Crispr_2_60 |                             |
| CGGCGATGGCTGAGCTCGAGGCCCGCGACCGTA | JS9_1_Crispr_2_61 | -                           |
| TCGGAGAAATAGACCGAGTCGGTCTCCGCGTAA | JS9_1_Crispr_2_62 | -                           |
| CGCACGAAGCACTCCCCAAGCGTGGCGTCATCC | JS9_1_Crispr_2_63 | -                           |
| CGCAAAGGCGCGGCACCGGGCAGGTGTCAGC   | JS9_1_Crispr_2_64 | -                           |
| TAGGGGTAGTGGCTGAGAAGCACACGACACCA  | JS9_1_Crispr_2_65 | -                           |
|                                   |                   | Anatole, B3,<br>E1          |
| CGTGTGCCTGCCGGTGCGAGCGATTCGTCGAGC | JS9_1_Crispr_2_66 |                             |
| ATCACCGAATTTGGCCTTGGCGTCGGCCGACG  | JS9_1_Crispr_2_67 | -                           |
| CGCCTCCGCGAGACCGTCGATCTTGCCCGATAG | JS9_1_Crispr_2_68 | -                           |
| TCAGCCACAAGAGTCCGCTGCAGCTGCTTGAC  | JS9_1_Crispr_2_69 | -                           |
| GAAGGTTGGCGGTGGTGGGGATTGCGATATCTG | JS9_1_Crispr_2_70 | -                           |
| GTCTTCCCAGATCGGATAGCGCCTTCCCAGAGG | JS9_1_Crispr_2_71 | -                           |
| TCTGGCCGAACATCCTCCGGAAGGTGATCGCC  | JS9_1_Crispr_2_72 | -                           |
| CCGGAAGTCAAGGAATGTACCGCCGTGCTCATA | JS9_1_Crispr_2_73 | -                           |
| GGCACCGCGATGACGATGCCCTCGATAATCGAC | JS9_1_Crispr_2_74 | -                           |
| TGAATCGCCCTAACGTGAATCTTCTCAAAGTCG | JS9_1_Crispr_2_75 | -                           |
| TGAGTGAGTCAATCGCGTCGTGTGCGGCCCGCA | JS9_1_Crispr_2_76 | -                           |
| ATAACCGTAAACATAAAGGGGCATAGAGTAACG | JS9_1_Crispr_2_77 | -                           |
| CCAAGTCTGGGCGGAAATGATGTCTTGACA    | JS9_1_Crispr_2_78 | -                           |
| AGAGCGGGCACATAGATCGGGGTGCCGTTGTCG | JS9_1_Crispr_2_79 | -                           |
| TACGCCACCGCAGCGGCACCCGCGCGGCGTAC  | JS9_1_Crispr_2_80 | -                           |
|                                   |                   | Anatole,<br>B22,            |
| TAGCGGTGCTCGATGACCTTGACGCCCTGAGAG | JS9_1_Crispr_2_81 |                             |

|                                     |                   |            |
|-------------------------------------|-------------------|------------|
| ACTGCCCGGCGACACAATGGGGCTGGACGCTCC   | JS9_1_Crispr_2_82 | Doucette,  |
| TTCGTCTTGGCCGACGTGGCTCGGATCCTCGAC   | JS9_1_Crispr_2_83 | E1, G4     |
| GTGTACTTGGCGGAGCCGACGTGGCGCCGATG    | JS9_1_Crispr_2_84 | -          |
| TAGTGTCAAGACACCTTGAAGGCGAGGCCCTTCA  | JS9_1_Crispr_2_85 | Doucette,  |
| CGTCGTAGATCGTCGGGTCGGGATCTTGGCGAC   | JS9_1_Crispr_2_86 | G4         |
| GCGGGCGACGCCCCGGACGCCGCCTGGATCGAA   | JS9_1_Crispr_2_87 | Doucette   |
| CTCGTGAAGTCGGGGCGTTGACCCAGCTGTCC    | JS9_1_Crispr_2_88 | -          |
| CACCGCCACGCCGGGGGAGGGCGGACGCCCCG    | JS9_1_Crispr_2_89 | B22,       |
| GAGCATCGGCTGGCCGTTGCTGAAGACCTTCGG   | JS9_1_Crispr_2_90 | Doucette,  |
| AGCTCCGGCAGCGCCTCCCATGCGCCCGCGGG    | JS9_1_Crispr_2_91 | E6, G4     |
| TTCATATCGCTCAGAGCGAACAGAACTCCTGGC   | JS9_1_Crispr_2_92 | -          |
| ATCACCAAACGCATCGCCATCATCCGCGCTCG    | JS9_1_Crispr_2_93 | -          |
| TCGCCTCTTTCGGGTCAGCGATCGCCGCTCCGTTT | JS9_1_Crispr_2_94 | -          |
| CAGATCGCCGTTCTTCTCGGCGGCCGCGATGAG   | JS9_1_Crispr_2_95 | B22,       |
| TATCCGTCCCATGTAATGAGAATAAGGTCCCCG   | JS9_1_Crispr_2_96 | Doucette,  |
| TTAACGATAGACGGTGAATAAGTGGCATATCC    | JS9_1_Crispr_3_1  | E6, G4     |
| TCTTTATCTTCTGTCTACGTGTGCGACCTTCA    | JS9_1_Crispr_3_2  | -          |
| GGATGAAGATTGCGATTAGCGGGTCTGACATG    | JS9_1_Crispr_3_3  | -          |
| GCGGGTGTGGCTTCGTGACACACATTGCTGGAC   | JS9_1_Crispr_3_4  | -          |
| TTTACTGGTCGCCATAATCGTAATTGCCGGTC    | JS9_1_Crispr_3_5  | -          |
| TGACTAGTAACGTGCCAGGTGCTCGGCGTGTGCG  | JS9_1_Crispr_3_6  | -          |
| GTCCACTTCTCCATCGACACCGACGAGGACACC   | JS9_1_Crispr_3_7  | -          |
| CTTCCGGAGGGCGCGGAATCCGGGGTAGGGCC    | JS9_1_Crispr_3_8  | -          |
| AATCAGGCTGGATTGTCAACACCTTACCAATA    | JS9_1_Crispr_3_9  | -          |
| TTGACGGCCGAGACGGTTTGAGCGATGGCCTT    | JS9_1_Crispr_4_1  | -          |
| CCCCACTTGGATCCGTCCCACGTCTGGGCAT     | JS9_1_Crispr_4_2  | -          |
| ATCTCGTCCAGGGCACTGCCGGCTGAGTCAGT    | JS9_1_Crispr_4_3  | -          |
| ATGGAATCCTCAGTGGACGCATCCCGCGCCGT    | JS9_1_Crispr_4_4  | -          |
| TTCCGCAAGAAGCACCTGTTGCCAAGACCGA     | JS9_1_Crispr_4_5  | PFR1, PFR2 |
| ATCGCTGACCAGACCGCCGACGCCACGGGAAA    | JS9_1_Crispr_4_6  | -          |
| GCCCTGCCGGCCTTTGGTGAGGCGGTGACGT     | JS9_1_Crispr_4_7  | -          |
| ACCAGCGTGTGGCGAAATGTCGTTACCTGCTG    | JS9_1_Crispr_4_8  | B3         |
| CGACGACCTGTACCGGCATTCGAGGTGGCTGGC   | JS9_1_Crispr_4_9  | -          |
| TTCAACACACCATCAGTGATTAGAAACGCTTG    | JS9_1_Crispr_4_10 | -          |
| GGAACCTGTACTAAACCTATCTCCGAATACT     | JS9_1_Crispr_4_11 | -          |
| CCGGTCAGCGGGATGCCGACTGACTTCAGGTC    | JS9_1_Crispr_4_12 | -          |
| GAGTTCATGGCCACGACGGCGCCGATCCTGC     | JS9_1_Crispr_4_13 | -          |

|                                    |                   |            |
|------------------------------------|-------------------|------------|
| CGGTGCCGCTTTCGCGGTGCACCTGTCTTTCGT  | JS9_1_Crispr_4_14 | Doucette   |
| CCTGCGATATTTCCGGCCGGCGATTATGACGAA  | JS9_1_Crispr_4_15 | PFR1, PFR2 |
| AAAGGTTCAAGCTGCGACATGCCGCGCATGAT   | JS9_1_Crispr_4_16 | PFR1, PFR2 |
| TGAGGAGGGCGATGATCTCGGTGGTGTGCATT   | JS9_1_Crispr_4_17 | -          |
| GTTGGATGTTTTCGGTCGGCCCTCGCCTGGTG   | JS9_1_Crispr_4_18 | -          |
| CCGTCAGGGCGAACTGCCTTAAAACAGGTGCC   | JS9_1_Crispr_4_19 | -          |
| GGGATGCCGCTTGGGATGCCGCTTGGGGTGCC   | JS9_1_Crispr_4_20 | -          |
| GTGGTGGCCCGTCCGTCGATCACCGTCGGGGC   | JS9_1_Crispr_4_21 | -          |
| GATTTTGAGAGTCTCGCGCAGACGCTGCCCGG   | JS9_1_Crispr_4_22 | PFR1, PFR2 |
| GCCACCCCTACACAGAATGCTCGGGCCTATGC   | JS9_1_Crispr_4_23 | -          |
| GGCACCGGCCCCACGCGTTCGCTGGTCGGGT    | JS9_1_Crispr_4_24 | -          |
| GTCGTCGTGGCGCGCTGGATTCGATGGGCTG    | JS9_1_Crispr_4_25 | -          |
| GCATCAAGAATATCCGGAAACCGCCTGTTCA    | JS9_1_Crispr_4_26 | -          |
| TATGACCAGCTCACCGCGACGCTGGGGAGAA    | JS9_1_Crispr_4_27 | PFR1, PFR2 |
| CCACGGAGCCAGCAAACTTCGGCGGCGTCCG    | JS9_1_Crispr_4_28 | -          |
| TGGAGCAGGTCAAGATGTTCAATTACTIONCGG  | JS9_1_Crispr_4_29 | -          |
| CCATGGAGTCAGCAAAATTTAGCGACACCGG    | JS9_1_Crispr_4_30 | -          |
| GGCAGCATCGCCAGGGCTTCGTCGCCGAGCAT   | JS9_1_Crispr_4_31 | -          |
| TCCGCCAACTTCGTCCACGCCTTCACTGGTT    | JS9_1_Crispr_4_32 | PFR1, PFR2 |
| TTCGCGCCGATACGCCCCACCGAGGCAACCAG   | JS9_1_Crispr_4_33 | -          |
| CTCGCCATGTCGGCGCCCAACCCCGGGTGGT    | JS9_1_Crispr_4_34 | -          |
| GTCGCGGCATGAACCGCACCTATTTAGGGCT    | JS9_1_Crispr_4_35 | -          |
| TTGATGGTGTGTGCATCAGTTCCTTGAAC      | JS9_1_Crispr_4_36 | -          |
| CACGAGACAGAACAAGATCATAGCCCCGCTTT   | JS9_1_Crispr_4_37 | -          |
| TTATCTATGATGAACCTCGTCATAGATGATTAGC | JS9_1_Crispr_4_38 | -          |
| TTAATGATCCGCATTACTIONTCTGATGGGCGC  | JS9_1_Crispr_4_39 | -          |
| AATTCTGTCCGGAGCTTCTGCATCCGCCTCGA   | JS9_1_Crispr_4_40 | B3         |
| ACAGCGGAGGTCTGCGCACCAAGCCGGAGACG   | JS9_1_Crispr_4_41 | -          |
| GGTTGAGCCGGCTGGCCCGTGGCTCTCCAGG    | JS9_1_Crispr_4_42 | -          |
| ATCGACGAGGAGGACTCATGAGCACCCCCACA   | JS9_1_Crispr_4_43 | -          |
| GATCGAGGCCCTCTTGTGGGGTAGCGCCTCAG   | JS9_1_Crispr_4_44 | -          |
| GTTGTGGTTGCTATCCGCACAAAGACGGGCTT   | JS9_1_Crispr_4_45 | -          |
| CTGACGGTTCCGTGTGCGGGTATGTCGAGTTT   | JS9_1_Crispr_4_46 | PFR1, PFR2 |
| ACTTCCGCACCGAGGTGCTGTGTCATGGGTG    | JS9_1_Crispr_4_47 | -          |
| GGCCTGATGGCCGAGCCTCCGACCACGGTGGT   | JS9_1_Crispr_4_48 | PFR1, PFR2 |
| TGACGATGCCCTAAGGAATGTTATTGACCAC    | JS9_1_Crispr_4_49 | -          |
| CATTCAGGTGCGTCAGGCAATTGGGTCGACAC   | JS9_1_Crispr_4_50 | -          |
| AAATGACAAATTGTTGTCCTGAATACATTAG    | JS9_1_Crispr_4_51 | -          |
| TGATAAACGTTGCGGTTGCAGAATCACCTTA    | JS9_1_Crispr_4_52 | -          |
| TGTGAGGCCGCCAGATGCCCGTTTCTGGGC     | JS9_1_Crispr_4_53 | G4         |
| GGTTTGGGTGAGCAGCTTCGCCAGTCCTTGT    | JS9_1_Crispr_4_54 | PFR1, PFR2 |
| AAGCTGGGCGGGGGTGTGAGTCGGTTCCATTG   | JS9_1_Crispr_4_55 | -          |
| CCCGTCCGCCCAACACATGCGTCGTGGAATT    | JS9_1_Crispr_4_56 | -          |

|                                        |                          |              |
|----------------------------------------|--------------------------|--------------|
| CAACGGGCGTGGCCGGCACCTTACATCAGGG        | JS9_1_Crispr_4_57        | -            |
| GAGACAGAAAAGCCCCGGCGAGAAGCCACTC        | JS9_1_Crispr_4_58        | Doucette,    |
| GCGCAAAGTTACGCGGAGTCGTATCGGATGGC       | JS9_1_Crispr_4_59        | B22          |
| TCGCCACGGCGGGCGCGCTCGACGCCTTTCGA       | JS9_1_Crispr_4_60        | -            |
| TTGAAAGCCAAGGCATTACCCTGCAGGGACTT       | JS9_1_Crispr_4_61        | -            |
| GTTGCATTATCGTTGAATGTAATCGGCGTCGT       | JS9_1_Crispr_4_62        | -            |
| GCCGGCATTACAGTGCATCATGGTCGTTCCAAA      | JS9_1_Crispr_4_63        | -            |
| TCGGGCGAAGACCCTGCCAGGTATAACGATGC       | JS9_1_Crispr_5_1         | -            |
| TTAGGAAGAGTATTTGTCCTTACTTTGAGTGG       | JS9_1_Crispr_5_2         | -            |
| GGACGCGTTCTTGGCGACTTGGCCGGGGGCGG       | JS9_1_Crispr_5_3         | -            |
| CGATGACTGACCTGCTGCCCCGACATCGCAGCGA     | JS9_1_Crispr_5_4         | PFR1, PFR2   |
| CGCCCCGTAGTTGGTGCGTAGGTCGGCATCGA       | JS9_1_Crispr_5_5         | -            |
| CAACTGTGGGAAGTCGACGGCGACCCGGTGCG       | JS9_1_Crispr_5_6         | PFR1, PFR2   |
| CCTGGATCGCGTTCCGGTCCGCCCGACTCG         | JS9_1_Crispr_5_7         | -            |
| CGCTTGCCTGCCATGGATTGGCGGACCCGCAAG      | JS9_1_Crispr_5_8         | PFR1, PFR2   |
| ATCGCGGCGGCGACCCGCTCCCTGTGTCGGG        | JS9_1_Crispr_5_9         | -            |
| CCCGAGCCATCAAGGCCGCCCTGGACAGTGGA       | JS9_1_Crispr_5_10        | -            |
| TCCCGTCGCCTCGTCGATGGTGAACATCGACA       | JS9_1_Crispr_5_11        | -            |
| TCAGCCAGGTGGTGGGGTGTGGATAAAGCGT        | JS9_1_Crispr_5_12        | PFR1, PFR2   |
| GCCCCGAAATTGCTCCGCAGGTCGGCGTCGA        | JS9_1_Crispr_5_13        | -            |
| CTAACGAGGAGAGAACCTTTCGGGAGAGTTG        | JS9_1_Crispr_5_14        | -            |
| TCGCTCGAACAGACCGTCGGCACACTGTGCGG       | JS9_1_Crispr_5_15        | -            |
| ATGGTGCGCCGATCCCTGCCGAAGTTGGGTC        | JS9_1_Crispr_5_16        | -            |
| ATGGCGCAGCTGCTACCCGACATCGCCGAAAA       | JS9_1_Crispr_5_17        | -            |
| TTAAAGCCGTGGTGGACTGGTTCAAGAACTCG       | JS9_1_Crispr_5_18        | -            |
| CGCACCACCCGCAAGGCGACG                  | JS9_1_PossibleCrispr_1_1 | -            |
| AAGCCGGCGGCCAAGAAGCCGGCA               | JS9_1_PossibleCrispr_1_2 | -            |
| ACGGCGTCCACGGCCAAGCCGGCA               | JS9_1_PossibleCrispr_1_3 | -            |
| TGCCACCTGGCCAGAAACCTCTACCCCGAGCCCCTGA  | JS9_1_PossibleCrispr_6_1 | -            |
| ATCAGCCGGATAACCATTACCCGGCCCCGAA        | JS9_1_PossibleCrispr_7_1 | -            |
| CTGGGTAGTAGTATAATCTTACTTGTGATGAAGGG    | JS10_Crispr_2_1          | -            |
| CCGACGCTTGCCTGGAGCAGCTCGGCGACGTCCTTCTG | JS10_Crispr_2_2          | -            |
| TGTTGGATGCCTGGCTGGTGGGGATCGTGCGCCACAGG | JS10_Crispr_2_3          | -            |
| CCCCGAACTGGCGTCCCGGCCCTCTTCTCCGT       | JS10_Crispr_2_4          | -            |
| CCTGTCATTGCCCATTTGGCCGCTTGAAGCTTGAT    | JS10_Crispr_2_5          | Anatole, B3, |
| GCTCGGGGATGCTGCCCTGGCGATGCTGCCGACCGC   | JS10_Crispr_2_6          | E1           |
| GACAGCGCGTCCGCTCGATCATCGGCGACCAGCCCT   | JS10_Crispr_2_7          | -            |
| GACGATACAAGACTGACCTAACGAATAAGGAAACG    | JS10_Crispr_2_8          | PFR1, PFR2,  |
| GCCTCCAGCGGTGAAAGAGCGGCAGCGCTACGGACG   | JS10_Crispr_2_9          | G4           |
| CCGACCGCCAAGATGATCAATGAGCGGAAGCACAC    | JS10_Crispr_2_10         | -            |
|                                        |                          | PFR1, PFR2   |

|                                                     |                         |              |
|-----------------------------------------------------|-------------------------|--------------|
| TTGAAGCAGGCGCCCGCAGCGCCCATCGCCCGG                   | JS10_Crispr_2_11        | -            |
| GACCGGGTGAAGCGCGCCGGGGGCCTGAGCATCAAAC               | JS10_Crispr_2_12        | -            |
| GGATCGTAGCGGGGCTGTTGGCAGCAAGTCTCGCTG                | JS10_Crispr_2_13        | -            |
| GACTACAGGTGTTGATCTGGTCTGTGGCCGTCGA                  | JS10_Crispr_2_14        | -            |
| GTAGGTGGAGGGGCGCAGACATTAATAATCTACGCC                | JS10_Crispr_2_15        | -            |
| CAGAACAACGCTCGAGGAAAGGGTTCCAATCTCATG                | JS10_Crispr_2_16        | -            |
| GGTGTGAGTTACCGCCATATTCGCCAGAGTCTTGAA                | JS10_Crispr_2_17        | -            |
| CCGTTTCGGCTGTCGCCACCAACTGCTCCGGGATGGGC              | JS10_Crispr_2_18        | -            |
| ACACCCGCGCGATCGAGGCCGACCTGAAACGCTG                  | JS10_Crispr_2_19        | -            |
| GACGGCGGGCCAGTTGCACAACACGGCCACCCGCACCAA             | JS10_Crispr_2_20        | -            |
| TTCGCGGTGCGGTGCGCAATGCTGGACGCGTGCCCGA               | JS10_Crispr_2_21        | -            |
| CTCACGCCCGGAACCCATGCCGGAAGATCAGTCGCC                | JS10_Crispr_2_22        | -            |
| GCGGCGCCTCAGATGGACCTGTCCAGCGGTGAGC                  | JS10_Crispr_2_23        | -            |
| ACGGCCTCGCCGTCGCGGCTGATGCTCGCATGCATC                | JS10_Crispr_2_24        | PFR1, PFR2   |
| GCTCGGCGACGCCGCCCTGGCGATGCTGCCGACCG                 | JS10_Crispr_2_25        | -            |
| GTGGTTTCGACGCCCTTGTCGGGGCCGTGCCTGCC                 | JS10_Crispr_2_26        | -            |
| GCCGGTGTCCCGTCACGCCGGGGCGTTCTTCGG                   | JS10_Crispr_2_27        | -            |
| ACCTGGGCGGCCCTTCGGATTGTCCAGGTCAAAGAAG               | JS10_Crispr_2_28        | -            |
| GGCGAGTTGGCTCGGACCTCTGGACAATTTTTGGA                 | JS10_Crispr_2_29        | -            |
| GCAGCTGCTGGTCGCTTTGGTGCAGGGCATCCTCTC                | JS10_Crispr_2_30        | -            |
| TATTCACAGGATGCATGGGTTGCTCACATATGGACG                | JS10_Crispr_2_31        | -            |
| CCGAGATCACAGATGCCGAGCTCATCACCATTCA                  | JS10_Crispr_2_32        | -            |
| AGACGTGTCAGGCGACAGCGGAACCAAGACAGCCG                 | JS10_Crispr_2_33        | -            |
| TTCGCCGTGAAGACCCGCGAGGCGGAGGTCGCCCGT                | JS10_Crispr_2_34        | -            |
|                                                     |                         | Anatole,     |
|                                                     |                         | B22, B3, E1, |
|                                                     |                         | E6           |
| GGCGGGTCCGCGAGATTCGTCGGCGTCGCACGGCGG                | JS10_Crispr_2_35        | -            |
| GTGAGCTCGGGCTGAGCGTGAGCCAGACAGCGGCAAAG              | JS10_Crispr_2_36        | -            |
| GCGAAAGAGCGATCATTCCGGGTATGGATCAAACC                 | JS10_Crispr_2_37        | -            |
| GGGGTCTGCAACGGGGTCAGCCCAACAAGCTGACCCACTGGATCCACCACA | JS10_PossibleCrispr_1_1 | -            |
| CTGGAGCTTGCCCTTGCGGCCACTGATCCGAAGA                  | JS10_PossibleCrispr_3_1 | -            |
| CTGGCCAGAAACCTCTACCCCGAGCCCCTTGA                    | JS11_PossibleCrispr_1_1 | -            |
| TCAAGGAGCGGCGTGGAGCCCCGCTTCCGCTCCAG                 | JS11_PossibleCrispr_2_1 | -            |
| CCTCGTAAAATCGCAGCCCTGCTCCACATGCCCCC                 | JS12_1_Crispr_1_1       | -            |
|                                                     |                         | B22,         |
|                                                     |                         | Doucette,    |
|                                                     |                         | E6, G4       |
| GGCGAGGTGCGGCTGCAGTACGGGAACCAGCGCAAGC               | JS12_1_Crispr_1_2       | -            |
| AGGTCACAGGCGAACCTGCGCACGGTGATTGACTTCCAG             | JS12_1_Crispr_1_3       | -            |
| ATCTCGACGTGGTCGAAAGTCGGATTGTGGCCTGACC               | JS12_1_Crispr_1_4       | -            |
| TGTTTCCAGCGGGATTGCAGTGTGCAATTCATGACCC               | JS12_1_Crispr_1_5       | -            |
| GAAGCTGGGCGGCACGCTGTCTGGCTGGGGCAGCTCGA              | JS12_1_Crispr_1_6       | B3           |
| AGCCGTCGACATTGCAACCAACGTTCTACGAGGCG                 | JS12_1_Crispr_1_7       | -            |
| ACACGATCCCCGGGGCGATGACTCCCATGCCCGTACG               | JS12_1_Crispr_1_8       | -            |

|                                           |                    |                             |
|-------------------------------------------|--------------------|-----------------------------|
| GGCGGCCCGTTCAACATTCCGGGGATTGCCTCGCTG      | JS12_1_Crispr_1_9  | E6                          |
| GCGGGTCGCGACAACGTGGCCGACGATGACCCCAG       | JS12_1_Crispr_1_10 | -                           |
| TGTTCTTACAGAAGTTGGATACACGCTAAAGTTCTAGG    | JS12_1_Crispr_1_11 | -                           |
| TCGAAGTTGGACGAGGACAATCATCGGGCAATTCTGGAA   | JS12_1_Crispr_1_12 | -                           |
| TTGCACACCTAACATGGTTGTGATGGCGGACAATCAGCCT  | JS12_1_Crispr_1_13 | -                           |
| TCACCCCCGGTTCGCCTTAAGCAGCCGCCACCGCT       | JS12_1_Crispr_1_14 | phiB5                       |
| ACCATGACTTTCTCGGATGCCTGAAGTGGCGCACCTTCGG  | JS12_1_Crispr_1_15 | -                           |
| TGCCGCTGGTCCACCATCACGTCGTGGCCGAGCAT       | JS12_1_Crispr_1_16 | -                           |
| TGGTAATACATTAGGACTGTGGCCTGTAGTTTTACAG     | JS12_1_Crispr_1_17 | -                           |
| AGCACAAGTGCCCGGCCTGCCATTACGACACGCCGG      | JS12_1_Crispr_1_18 | -                           |
| GATCCGATTCCCGCAGCGCCGCTGATCGGTGTCGCCA     | JS12_1_Crispr_1_19 | -                           |
| TTCATTGACAGAGTTCTCCATTGCATCAACATCCTT      | JS12_1_Crispr_1_20 | -                           |
| AGTCAGGATGCATGGGTGCGTAGCCACATGGATGAAA     | JS12_1_Crispr_1_21 | -                           |
| AATTTGTGGGGTTCCCGGTGATTGTGACTACCGC        | JS12_1_Crispr_1_22 | -                           |
| GAACGGATCGATCGACTTCAACCCGAAATTCCTCAA      | JS12_1_Crispr_1_23 | -                           |
| CACAACCCGCCCTACTGGCGCACCCGGCAGTCAGCT      | JS12_1_Crispr_1_24 | -                           |
| CCTACCAGCCCAATGTATACGGACCGATCGGATGGTCATC  | JS12_1_Crispr_1_25 | -                           |
| TCGTGCGGCGGCATGGTGC GCGGCGACCGCACCCAAA    | JS12_1_Crispr_1_26 | PFR1, PFR2                  |
| ATTAGTAAGGCGCTACGACCGTGGATGTTCCGT         | JS12_1_Crispr_1_27 | -                           |
| CCCGAGGCGAGTCCCTCACGTTACTGAGCGTGG         | JS12_1_Crispr_1_28 | -                           |
| TCATGAGAGTTGAGCTCTAGCGGTACCCGTAACCTCAGAAG | JS12_1_Crispr_1_29 | -                           |
| CCGGCAGCGGTGGTGTGTCGTCCACATTGGCGGT        | JS12_1_Crispr_1_30 | -                           |
|                                           |                    | B22,<br>Doucette,<br>E6, G4 |
| GTCGAAGGAATCGAGCAGCGCTCGGCATCCGACG        | JS12_1_Crispr_1_31 |                             |
| AAAAAAGCTGCATCCCAGCTGCCAACCTCCCCTGGG      | JS12_1_Crispr_1_32 | -                           |
| ATTCCACATACCCGTCAGGCAGCTTGAGATGCG         | JS12_1_Crispr_1_33 | -                           |
| ACCCGCGTCACCCTGCTCGAAGACCCGACGAACCGGACC   | JS12_1_Crispr_1_34 | -                           |
| CTGTGACCTCGACGGTGGAAACCGACTGCACAGG        | JS12_1_Crispr_1_35 | -                           |
| CAGGGCGTGGTGAAGCTGTTCTGGCAGAATCCTGCC      | JS12_1_Crispr_1_36 | -                           |
| TTCGGGAAGCTCACAGAATCATGGCGCACGGTGGAA      | JS12_1_Crispr_1_37 | -                           |
| GTCGAATCAACATTTCTGCCAAGCTCCAGGGTG         | JS12_1_Crispr_1_38 | -                           |
| TTACCGGTCTTACCCTCTAGCGCCGTGGACGACCATAACC  | JS12_1_Crispr_1_39 | -                           |
| ACCCACTCGTTGTAATAATCCACCGACCTCGGCGGAG     | JS12_1_Crispr_1_40 | -                           |
| GGCGCCGCTCGGGACGCTGCTCGGG                 | JS12_1_Crispr_1_41 | -                           |
| ACTCCTTGTTGTTGGCAGTTCGTTTGGTTGGCCCTCGC    | JS12_1_Crispr_1_42 | -                           |
| AAGTGGCCGCGGGCAGGGTCCAGGCGGGCAGGTCCA      | JS12_1_Crispr_1_43 | -                           |
| GGCGGCCGTTCCGATTGTTTCCGCCGTTTCGATAAG      | JS12_1_Crispr_1_44 | -                           |
| CCAAAAGGGCAACATACAGTACATCCGCAACGAGGC      | JS12_1_Crispr_1_45 | -                           |
| TCCGTCAGGTGCTTGAAGGTATGGGGCTGACGTTCT      | JS12_1_Crispr_1_46 | -                           |
| GTGCGCATCAGATCACACGCCAGCAGTGCCGAGGGC      | JS12_1_Crispr_1_47 | -                           |
| TTCGCGTCGGCGACCAGCGATCTGGCTGGTCCGG        | JS12_1_Crispr_1_48 | -                           |
| GGATTACCGAGGTGGCCTTGCAGTCGCGGGGTGCCCCGG   | JS12_1_Crispr_1_49 | -                           |



|                                         |                           |                                    |
|-----------------------------------------|---------------------------|------------------------------------|
| CACGATGCGCCGTGGGCGACACGACGCCTTTGGGG     | JS12_1_Crispr_1_50        | -                                  |
| CAGGGCGTGGTGAAGCTGTTCTGGCAGAATCCTGCC    | JS12_1_Crispr_1_51        | -                                  |
| CGCACCAAGGCCCGGCTCGGGCAGGGACGGTTGCCGT   | JS12_1_Crispr_1_52        | -                                  |
| GTCATGGTGTGCGCACAGAAACCTAGAGTTCGGGCGG   | JS12_1_Crispr_1_53        | -                                  |
| GCGAAAGAGCGATCATTCCGGGTATGGATCAAACC     | JS12_1_Crispr_1_54        | -                                  |
| CTGGCCAGAAACCTCTACCCCGAGCCCTTGA         | JS12_1_PossibleCrispr_2_1 | -                                  |
| TCAAGGAGCGGCGTGGAGCCCGCCTTCGCTCCAG      | JS12_1_PossibleCrispr_3_1 | -                                  |
| CTGGCCAGAAACCTCTACCCCGAGCCCTTGA         | JS13_1_PossibleCrispr_1_1 | -                                  |
| TCAAGGAGCGGCGTGGAGCCCGCCTTCGCTCCAG      | JS13_1_PossibleCrispr_2_1 | -                                  |
| GTTGAAGCAGGCCGACACTGCTGGGCAGGTCCGTG     | JS14_PossibleCrispr_1_1   | E1, Anatole                        |
| CTGGCCAGAAACCTCTACCCCGAGCCCTTGA         | JS14_PossibleCrispr_2_1   | -                                  |
| TCAAGGAGCGGCGTGGAGCCCGCCTTCGCTCCAG      | JS14_PossibleCrispr_3_1   | -                                  |
| ACGGCAACCGTCCCTCGCCGAGCCGGGGCCTTGGTGCG  | JS15_1_Crispr_1_1         | -                                  |
| ACGCAGATTGGAGGAAGCAAATGGGCAAGCAAATGC    | JS15_1_Crispr_1_2         | -                                  |
| CTTTGCCGCTGTCTGGCTCACGCTCAGCCCGAGCTCAC  | JS15_1_Crispr_1_3         | -                                  |
| GGTCCGGCTCCTGCGCCGCTGGGAAGCCCTCGCCGCCAC | JS15_1_Crispr_1_4         | -                                  |
| TCGACAACCGTGGTGTTCATGGGCATGCTCCTTTGA    | JS15_1_Crispr_1_5         | -                                  |
| TCAAGACCGAACCGGATCACATGCGCACTGTGCGC     | JS15_1_Crispr_1_6         | -                                  |
| CTGTCGAGCAAATTCAGCTCACACAGGAGGAAGCCCA   | JS15_1_Crispr_1_7         | -                                  |
| CCTACTATTGATGCCACAACGGCATTTCAGGAGAA     | JS15_1_Crispr_1_8         | -                                  |
|                                         |                           | Anatole,<br>B22, B3, E1,<br>E6, G4 |
| CGCGTGC GCGGCCCGCTTGC GAGGAAATTTGTCGGG  | JS15_1_Crispr_1_9         | -                                  |
| CGGCCCCGTCTGGTCGGACAGCCTTGAAGAGCCGG     | JS15_1_Crispr_1_10        | -                                  |
| TTAGCGAGTTCTGCCAGTCGTCTCCACACCTGCCC     | JS15_1_Crispr_1_11        | -                                  |
| GGGATGGTTGGCGATGGTCCGCCGATCACATCGAC     | JS15_1_Crispr_1_12        | -                                  |
| TGTCAGCTCAAATCAGCCAGTCGGCTACAATACAT     | JS15_1_Crispr_1_13        | -                                  |
| TCAAAGAAATGGGGCTTGTGCGCAGCTCGGTTG       | JS15_1_Crispr_1_14        | -                                  |
| CGGTGCAGGGTGCCCGATCCCGCTGTTACCGGACCC    | JS15_1_Crispr_1_15        | -                                  |
| CGCTGAAGTGATGGCATTATCAGAGGAGCGAGCTTCGG  | JS15_1_Crispr_1_16        | -                                  |
| AATGTTGTGGTCATACCCGCGCCGGGTGCGGAACGT    | JS15_1_Crispr_1_17        | -                                  |
| TGCTAGAGAGTTCTGGGGAATATGGATCGTCGT       | JS15_1_Crispr_1_18        | -                                  |
| CTTGGGGGCCGGTCCCTGGAGTGGGTGAGTCTTCGT    | JS15_1_Crispr_1_19        | -                                  |
| CTTATCGAACGGCGGAAACCAATCGGAACGGCCACC    | JS15_1_Crispr_1_20        | -                                  |
| ACCGTTGGTCCTCAAGCCCAATGTATTCAGGATG      | JS15_1_Crispr_1_21        | -                                  |
| CTGTGAGGCTCGTGCCGTCTGTTGTGTAGGGGTGGG    | JS15_1_Crispr_1_22        | -                                  |
| CGGGCCCGCGTCGTCTTGAACAGCCCGACCTTCGC     | JS15_1_Crispr_1_23        | -                                  |
| CTGAAGGTGTTGACGTTCTACGAAGAAGGCTGTATA    | JS15_1_Crispr_1_24        | -                                  |
| CGTCTCGTGGCATGTACATTCTGCCACCTGCTCAAC    | JS15_1_Crispr_1_25        | -                                  |
| GTGGGTGTTCTGGTGGTCGTGGGTGTCGGGTTCCGGGC  | JS15_1_Crispr_1_26        | -                                  |
| CTCAGCGGCAGATGCTGGTCAGTGAGGTCCTCACGAG   | JS15_1_Crispr_1_27        | phiB5                              |
| GATCTTGTGGTCCAGGACCGTGCCTGTGGTCTCTGTC   | JS15_1_Crispr_1_28        | -                                  |
| ACACCGATCAGCGGACTGTCGGTGGGAATCGGATC     | JS15_1_Crispr_1_29        | -                                  |

|                                           |                           |                                |
|-------------------------------------------|---------------------------|--------------------------------|
| CTGTGGCGCACGATCCCCACCAGCCAGGCATCCAACA     | JS15_1_Crispr_1_30        | -                              |
| CATTAATAGGCTATATCTTTTTAATTCCTAAAAATAAAG   | JS15_1_Crispr_1_31        | -                              |
| AATATGCGGCGCACCATGCCTCCATGTCCGGAGGC       | JS15_1_Crispr_1_32        | -                              |
| AAGCGGAGCGACAAGAGCGAACAGGGAGATTTTTTG      | JS15_1_Crispr_1_33        | -                              |
| GCCCCGGGACGACAAGCGCCCTGCTGTGTTGCTTACGGCGA | JS15_1_PossibleCrispr_2_1 | -                              |
| TGCCGGCTTGCCGTGGACGCCGT                   | JS15_1_PossibleCrispr_3_1 | -                              |
| TGCCGGCTTCTGGCCGCCGGCTT                   | JS15_1_PossibleCrispr_3_2 | -                              |
| CGTCGCCTTGCGGGTGGTGCG                     | JS15_1_PossibleCrispr_3_3 | -                              |
| GGTTTGATCCATACCCGGAATGATCGCTCTTTCGC       | JS16_Crispr_1_1           | -                              |
| CCGCCCCAACTCTAGGTTTCTGTGCGCACACCATGAC     | JS16_Crispr_1_2           | -                              |
| ACGGCAACCGTCCCTCGCCGAGCCGGGGCCTTGGTGCC    | JS16_Crispr_1_3           | -                              |
| TGGGCAAGACGACTCTGTCCACGATTGAGGGTGACG      | JS16_Crispr_1_4           | -                              |
| TTGCGATCATCTGGTCCACGTGAGCCCCGGTGCC        | JS16_Crispr_1_5           | -                              |
| AGAACGTCAGCCCCATACCCTCAAGCACCTGACGGA      | JS16_Crispr_1_6           | -                              |
| ATCGTCTGCTTGGCAGTCTCCGGGATACCCCCAAAGAT    | JS16_Crispr_1_7           | -                              |
| CCTACGGTTTGACGATGAGCAAGGGTGAGATCGA        | JS16_Crispr_1_8           | -                              |
| GTGGGGCCCTTCTTGATTTGTCTTGTGGTACACAGT      | JS16_Crispr_1_9           | -                              |
| CTTATCGAACGGCGGAAACCAATCGAACGGCCGCC       | JS16_Crispr_1_10          | -                              |
| TGGACCTGCCCGCCTGGACCCTGCCCGCCGGCCACTT     | JS16_Crispr_1_11          | -                              |
| GCGAGGGCCAACCAAACGAACTGCCAACAACAAGGAGT    | JS16_Crispr_1_12          | -                              |
| TTGAGTCGCGAAAAGCCTTTAACGAGAGCCACCCTGCG    | JS16_Crispr_1_13          | -                              |
| CCCGAGCAGCGTCCCGAGCGCGTTCAGAGCGGCGCC      | JS16_Crispr_1_14          | -                              |
| CTCCGCCGAGGTCGGTGGATTTACAACGAGTGGGT       | JS16_Crispr_1_15          | -                              |
| GGTATGGTCGTCCACGGCGCTAGAGGGTAAGACCGGTAA   | JS16_Crispr_1_16          | -                              |
| CCGGACCAGCCAGATCGTGGTCGCCGACGCGAA         | JS16_Crispr_1_17          | -                              |
| GCCCTCGGCACTGCTGGCGTGTGATCTGATGCGCAC      | JS16_Crispr_1_18          | -                              |
| CACCTTGTAATCAAGTCTGTCAAGTGAGCTGGTAGG      | JS16_Crispr_1_19          | -                              |
| ATCACCCCTTCAGCAGGAAGCCAGTGACCTTACCG       | JS16_Crispr_1_20          | -                              |
| CCTGTGCAGTCGGTTTCCACCGTCGATGTGACAG        | JS16_Crispr_1_21          | -                              |
| GGTCCGGTTCGTGCGGGTCTTCGAGCAGGGTGACGCGGGT  | JS16_Crispr_1_22          | -                              |
| GCCACGAAGGGTGAGTCGGTGACGGCGGAGAATAG       | JS16_Crispr_1_23          | -                              |
| ATTCGCCAGGTGAGCGGGAAGGGTGCAAATAGCTA       | JS16_Crispr_1_24          | -                              |
| TGTGCGACGCCAGCCGGCGCCAACGATATTGTGGTC      | JS16_Crispr_1_25          | -                              |
| TTCAACGACCGGCCGACGCCTTGAGCTCCTTGACGAA     | JS16_Crispr_1_26          | -                              |
| GGTGAGCTCTGACTGGATTGTGTTGATGTGGAGACC      | JS16_Crispr_1_27          | -                              |
| AGGAGGCGTCCGCCATCCCTTTCCAGCCAGGCATCGG     | JS16_Crispr_1_28          | -                              |
| CTGGAGGCGCTGCGAGGTGCCGCCAGACAAGA          | JS16_Crispr_1_29          | -                              |
|                                           |                           | Anatole,<br>B22, B3, E1,<br>E6 |
| TGCTTGCTCAGAGCTTGTCTCTTTTGGTCGTTTTGC      | JS16_Crispr_1_30          |                                |
|                                           |                           | Anatole,<br>B22, B3, E1,<br>E6 |
| TGCTTGCTCAGAGCTTGTCTCTTTTGGTCGTTTTGC      | JS16_Crispr_1_31          |                                |

|                                         |                           |              |
|-----------------------------------------|---------------------------|--------------|
| TTGCTGTGCAATGGCAGTCACTCCCGGTGGTCTTGCCT  | JS16_Crispr_1_32          | -            |
| TCTCCGCCACCAAGGCCAAGGAGACCCTGCCGCCGACGT | JS16_Crispr_1_33          | -            |
| TTGTTTCTCCCTAAAACCTTTAGTGTATATCCGACTTCT | JS16_Crispr_1_34          | -            |
| CAGAACTCTGTGCCGTCCGGGCGAACAGACTTAAA     | JS16_Crispr_1_35          | -            |
| AATAGGTGCGGTTTCATGCCGCGACC              | JS16_Crispr_1_36          | -            |
| GATCGATCCGTCTGTCGAAGGACTCGAACGGCCA      | JS16_Crispr_1_37          | -            |
| GGGTTTACGCGAGGGTGAGCATCAATGCCTACCC      | JS16_Crispr_1_38          | -            |
| GGGATGGTTGAGATGGTCCGCCGATCACATCGAC      | JS16_Crispr_1_39          | -            |
| GATTACGGCTTTTCCGTTCCAGGAATTAGCGGACGGT   | JS16_Crispr_1_40          | -            |
| CTCCTGCTCGTGGAGCCTGTAGGTGCCATGTGGACCCC  | JS16_Crispr_1_41          | -            |
| TGGTTTCTGTGAGCGTGTTGTAGGCGCTCTGATAGCC   | JS16_Crispr_2_1           | -            |
| ACCGAACATGCCCTCAGCGCCATAACCGGACTTCGC    | JS16_Crispr_2_2           | -            |
| TCTGGCTGTGGCACCTATGCGAAGGATGCCTTGG      | JS16_Crispr_2_3           | -            |
| ATTTTGTCTACCCCTTTCATCAAAAACTGAAT        | JS16_Crispr_2_4           | -            |
| AATCCTTTCTCCCTTTCACGCAGTTCGATGAATG      | JS16_Crispr_2_5           | -            |
| TGGTGGAGCTTCCCCTTGACATCGCGAATACTATGGCC  | JS16_Crispr_2_6           | B22          |
| TCCGAAGCTATCCAGGCGAACGCCACCATGACGTCCCG  | JS16_Crispr_2_7           | G4           |
| ATGAGGACCTTCTCGAAGCTCGGGTTGATCAGCAA     | JS16_Crispr_2_8           | -            |
| TTGACCTCGTCGGCACCGAACTTCGTCGCCACCCAGTT  | JS16_Crispr_2_9           | E6, B22      |
| GATGGAACGAACAATGCTCGAGCGAGACCTGGAGTT    | JS16_Crispr_2_10          | -            |
| GAACCGTGTGGCGACACATCGAGGAGCACGGTGACGG   | JS16_Crispr_2_11          | -            |
| CGGCCGCGAGGGCTTCGAGTATCAGGCGAGCTTCGGTGA | JS16_Crispr_2_12          | -            |
| TCTAGCCAGACGATCACGATCTGTGGCGGCATCGTC    | JS16_Crispr_2_13          | -            |
| CCCATCACCTCCGACACGTAGGCCGTCATGACTT      | JS16_Crispr_2_14          | -            |
| GTCTCAGGGGCGCAGATGATGACTCGTCGCTTCATT    | JS16_Crispr_2_15          | -            |
| TGTGGGCCAGCGTGGTGGTCAGCGACTTGACCGACGC   | JS16_Crispr_2_16          | PFR1, PFR2   |
| AATCTGAAGCCATAGAGAGTCGCATGCCGCCCTCAGA   | JS16_Crispr_2_17          | -            |
| GATCCACATGGTAGACCGGCCACTCATGATGCCCATCC  | JS16_Crispr_2_18          | -            |
| CGGGGTGTCGCCTGGGATGCCGCTCGATGTTCCG      | JS16_Crispr_2_19          | -            |
| CCGCATCTATGACACCCAGTTCCGCACGGAATACAT    | JS16_Crispr_2_20          | -            |
| CAGTTGATCATTACATCGAAGGTCTTATCGAAAA      | JS16_Crispr_2_21          | -            |
| GGTTGCGTTACTCGTGCCTGGCACTTGGCATTG       | JS16_Crispr_2_22          | -            |
| TTGAGGACCAGAGGCGTTCCATACTAGTCGTAGCTTCA  | JS16_Crispr_2_23          | -            |
| GAGGACTTCGGGAGTCAGTTGGGGTGCCGCCGGGGC    | JS16_PossibleCrispr_3_1   | -            |
| CGGCCATGCACGGGGCGGCCTCGCGCTC            | JS16_PossibleCrispr_4_1   | -            |
| CGCACCACCCGCAAGGCGACG                   | JS17_1_PossibleCrispr_1_1 | -            |
| AAGCCGGCGGCCAAGAAGCCGGCA                | JS17_1_PossibleCrispr_1_2 | -            |
| ACGGCGTCCACGGCCAAGCCGGCA                | JS17_1_PossibleCrispr_1_3 | -            |
| TGGCGTCCGTGTCCACACCATTGCCGCCCTGCACCTG   | JS17_1_Crispr_2_1         | -            |
|                                         |                           | Anatole, B3, |
| GTGTTGCTCGGATGCATCATCTCGACCACCCGACCGG   | JS17_1_Crispr_2_2         | E1           |
| TTGAAGAGCTTTGCGACGAGCGTCTGTCCGGGGT      | JS17_1_Crispr_2_3         | -            |
| GACCGTGACAATGGTGCCAGACCGTTACAACGAATC    | JS17_1_Crispr_2_4         | -            |

|                                         |                    |                  |
|-----------------------------------------|--------------------|------------------|
| GCACCACACGTCGGCGGTGCGCAGCATCGCGAGCGC    | JS17_1_Crispr_2_5  | -                |
| GAGAAGGATGGGGCGGGTGGCATCTGGTCGGTGCTAAGG | JS17_1_Crispr_2_6  | -                |
| ATCGCTTGGGAGGGTCGTATGGCCATCATTGCGGT     | JS17_1_Crispr_2_7  | -                |
| GTCGATTCGGACGGTCAAGTAAATGTGGGAACCGATC   | JS17_1_Crispr_2_8  | -                |
| TGATAGCTGTAATGTTGTATGCCTCTTCGAGCGCCGT   | JS17_1_Crispr_2_9  | -                |
| GAGTACTGCGCCCCGCGACAAGAACTTCCAGGCCGAAC  | JS17_1_Crispr_2_10 | B22              |
| CAGCAGAATAGAGAACTTGACCTTCGGCGTTCTTCTT   | JS17_1_Crispr_2_11 | -                |
| CGAAGTCGTTAGAGGGTACGCTAGAGGGCCGGCAG     | JS17_1_Crispr_2_12 | -                |
| CGACAGCCAGCCTCAGTCCTTCTGGAGGAAGTCCGG    | JS17_1_Crispr_2_13 | -                |
| AGCGGGTGAATACCTGTGCACCCTGCTGGAATGCGCCCA | JS17_1_Crispr_2_14 | -                |
| AGTGGGTGTCACAAGGACAAAGCAAGAGGCCCCACC    | JS17_1_Crispr_2_15 | PFR1, PFR2       |
| TATCAGTAGTCATATCTGTAAGAACATAGCCTATT     | JS17_1_Crispr_2_16 | -                |
| AATTTGCGGGCCATGCCCTATGGTGGGAACGATGGGCT  | JS17_1_Crispr_2_17 | -                |
| CGCAACCAGAACTCGCCCAATGCCTTTCGAGCCGAA    | JS17_1_Crispr_2_18 | -                |
| CAACCATGGAAGGATCGGGCGGGGTGACTGGTT       | JS17_1_Crispr_2_19 | -                |
| GATAAACACAATCATCTCAACGAAATGAAACATACGC   | JS17_1_Crispr_2_20 | -                |
| GCGTCTCGCGTCTACAAGGCTCGACCATTACACGG     | JS17_1_Crispr_2_21 | -                |
| GACCTGTGCTGCGTGAGGAGCTGGCGTTGCTGTC      | JS17_1_Crispr_2_22 | -                |
| GGGGCAACCACTTGCCTACCATCGTCCCAGGACAAC    | JS17_1_Crispr_2_23 | -                |
| GAGTCTGGTGTGCGGATGCAGGAGAGCGCCCATGTC    | JS17_1_Crispr_2_24 | -                |
| CAGCGCGATTCGGGCTCATCGAATCACTGGGACCACG   | JS17_1_Crispr_2_25 | -                |
| TGTTTGGGCTTGGGTTGCGTTGCCCTTCTGCCGCCT    | JS17_1_Crispr_2_26 | -                |
| CGAGATGGCCGGATGTGGAATTGATTACCGTGG       | JS17_1_Crispr_2_27 | -                |
| GACATCGACGCCATCGCCGACGAGCTGGTCACGCTC    | JS17_1_Crispr_2_28 | -                |
| CGGCAAGGTCCACTGGCTTCTGCTGAAGGGGTGAT     | JS17_1_Crispr_2_29 | -                |
| GGCCAGACGTGTGCACCGACGGCCACCGGGTAGACC    | JS17_1_Crispr_2_30 | -                |
| GCTCGTAATTTTGAACCATCCCAGGAAAAGCGGACGC   | JS17_1_Crispr_2_31 | -                |
| CAGAATCGACAATTCGATTAGATACCGGAGCAGCAA    | JS17_1_Crispr_2_32 | -                |
| AGAGCGGCTGAAAAGCTTCGGCACAATACCGGGCAG    | JS17_1_Crispr_2_33 | -                |
| AAGCGGATGCCGTGGCTTCTTCGGTGCCGATTCC      | JS17_1_Crispr_2_34 | -                |
| GTGGGCGGTGCCGCATGATGCCGGCCACGCCGTTGGT   | JS17_1_Crispr_2_35 | -                |
| TCCTTTCCTGCCGGCCGGGCACTCAAGACAACCGGGG   | JS17_1_Crispr_2_36 | Doucette,<br>B22 |
| AGGTCACACGAGCCGGTGATCTTGCCGAGGGTCTT     | JS17_1_Crispr_2_37 | -                |
| AGCCTTCTTCGTGGGAACGTCAACATCATTGGCGGCG   | JS17_1_Crispr_2_38 | -                |
| CACCTTGGATCAGCAACATCCATCGACGAGGCAGT     | JS17_1_Crispr_2_39 | -                |
| TTAATCCCTTCGATAATAGAATTGGGGTTCCAATA     | JS17_1_Crispr_2_40 | -                |
| TAACCGTTGAAAACCGGGCGTTCTCGTTGATAA       | JS17_1_Crispr_2_41 | -                |
| GATAGAACACGAAGGGATTACGAGGACTTTTGTTA     | JS17_1_Crispr_2_42 | -                |
| AGGTCTGGGTTTTGCGAATCCTCATGATTTCCGGCCCC  | JS17_1_Crispr_2_43 | -                |
| AAGAAGCAATCACACACGCCTCACCCAACGGGGC      | JS17_1_Crispr_2_44 | -                |
| CCAGGGGGTTCTTCGCCTCGTCGCCGCCAACGGTGTAT  | JS17_1_Crispr_2_45 | -                |
| CTGAAGGGCCCGGAGAGATTCCCATGTGACCTTCT     | JS17_1_Crispr_2_46 | -                |

|                                         |                         |                             |
|-----------------------------------------|-------------------------|-----------------------------|
| TTGGGGCGAGGTCGGTGGCCAGATCCTTGCCGGGATCGG | JS17_1_Crispr_2_47      | -                           |
| GAGAAGGTCGGGCTGTTCAAGGACGACGGCGGCCCG    | JS17_1_Crispr_2_48      | -                           |
| TTCGGCACCGATTTGGCGTTGGTGTCCGACCGGAT     | JS17_1_Crispr_2_49      | -                           |
| TAATAGTATCAGGAATAGTGCGGGACTTGAGTTTAA    | JS17_1_Crispr_2_50      | -                           |
| GCCACCGAAGCGCCGTTGACCGACTGGGATGCCACCACA | JS17_1_Crispr_2_51      | -                           |
| CAACCGAGGAGGGCGGATGCGGCGATAATGGCGGC     | JS17_1_Crispr_2_52      | -                           |
| TTGAAGGGCCCGGCGGGCGCGCCGCTCCAGGCAG      | JS17_1_Crispr_2_53      | -                           |
| GTCGGGAAGCTCACAGAATCCTGGCGCACGGTGGAC    | JS17_1_Crispr_2_54      | -                           |
| GGCGCCGCTCTGAACGCCGCTCGGGACGCTGCTTGGC   | JS17_1_Crispr_2_55      | -                           |
| ATCGTGGATCCGGGGAATGGCACGCGTACGGAGAT     | JS17_1_Crispr_2_56      | -                           |
| ACAGACACGTCAATGCCACGATCCATGTGCTTCCTT    | JS17_1_Crispr_2_57      | -                           |
| CAACGCCCTGCGACCTCGAAACGGCGCTGCGCAGG     | JS17_1_Crispr_2_58      | -                           |
| GGCCAATACTTCACGTTCTGTCGCCACCCACCATCTG   | JS17_1_Crispr_2_59      | -                           |
| GTGAGCTCGGGCTGAGCGTGAGCCAGACAGCGGCAAAG  | JS17_1_Crispr_2_60      | -                           |
| GCATTTGCTCGCCATTTGCTTCCTCCAATCTGCGT     | JS17_1_Crispr_2_61      | -                           |
| CGCACCAAGGCCCGGCTCGGCGAGGGACGGTTGCCGT   | JS17_1_Crispr_2_62      | -                           |
| GTCATGGTGTGCGCACAGAAACCTAGAGTTCGGGCGG   | JS17_1_Crispr_2_63      | -                           |
| GCGAAAGAGCGATCATTCCGGGTATGGATCAAACC     | JS17_1_Crispr_2_64      | -                           |
| CGCACCCCGCAAGGCGACG                     | JS18_PossibleCrispr_1_1 | -                           |
| CCGGCAGCGAAGAAGCCAGCA                   | JS18_PossibleCrispr_1_2 | -                           |
| CTGGAGCTTGCCCTTGCGGGCCACTGATCCGAAGA     | JS18_PossibleCrispr_2_1 | -                           |
| CTGGCCAGAAACCTCTACCCCGAGCCCTTGA         | JS18_PossibleCrispr_3_1 | -                           |
| ACTGCACCGTCGGATCAGCCGGATAACCATTC        | JS18_PossibleCrispr_4_1 | -                           |
| AGGCAACCGAGGCGCCGTTGACCGACTGAGATGCCA    | JS20_1_Crispr_3_1       | -                           |
| CAGAGACGTAATCAGGCCATCGTGTGATTAGACCAA    | JS20_1_Crispr_3_2       | -                           |
| CTCGTCAAACGTCAAGCTACAGGGTGCTAATGACGCCC  | JS20_1_Crispr_3_3       | -                           |
| CGGCCACGTCGTCGGTGAGGACCCTTGACACGGG      | JS20_1_Crispr_3_4       | -                           |
| GAGGGTCCGTTGACACTAAGTGTACATGGGGAAA      | JS20_1_Crispr_3_5       | -                           |
|                                         |                         | B22,<br>Doucette,<br>E6, G4 |
| GCCGAATCGGTCGATGCGGTGGGGTCGAGCTTCGAC    | JS20_1_Crispr_3_6       | -                           |
| TTACAACATGGATGTTGATGACAACGCAAGTACAT     | JS20_1_Crispr_3_7       | -                           |
| ACCAGCATATAGACCAGCATACTGACCATATCGT      | JS20_1_Crispr_3_8       | -                           |
| CACCACACAGCTCGGAGAAGCAGACCGGTGGGGCCGT   | JS20_1_Crispr_3_9       | G4                          |
| ACCCAGCCATCCACGGGCCCTCACCCCTGAGCGCGTG   | JS20_1_Crispr_3_10      | -                           |
| AAGATCAAGATTCTGACATTACTGGTCCGGATT       | JS20_1_Crispr_3_11      | -                           |
| CATCTAGCAATTGGTAAAAATCCAGTTCGCTCATCTG   | JS20_1_Crispr_3_12      | -                           |
| TTGATATCTGAATCTCAAGCTCAGACCCAATATCAAG   | JS20_1_Crispr_3_13      | -                           |
| TTAATCACATGGGGCGGATATAATCCGACCTATGACC   | JS20_1_Crispr_3_14      | -                           |
| TCACGCTCGCGCCCGGTACGGGCGACGGGATTCTCACC  | JS20_1_Crispr_3_15      | PFR1, PFR2                  |
| ACGTTAAAGTTCTAGGAGAAACACAATGAGTAACG     | JS20_1_Crispr_3_16      | -                           |
| ACTCCTACCGGCTTCTCGCCGGCATCCTCGAAGT      | JS20_1_Crispr_3_17      | -                           |
| AGTCAGGATGCGTGGGTTGCTCACACATGGACC       | JS20_1_Crispr_3_18      | -                           |

|                                                     |                           |            |
|-----------------------------------------------------|---------------------------|------------|
| TGCTTGCCGGGTGCGGAGGTCAATGATTACACCCGACT              | JS20_1_Crispr_3_19        | -          |
| GACACCCCGTATGCCGTAGCTCAGCACGAGAACG                  | JS20_1_Crispr_3_20        | -          |
| AGCGGCGATCTGAGCGGCGTCCCAAGCAGCGCCATAA               | JS20_1_Crispr_3_21        | -          |
| GCATCCGAAGCGGTGACCATTCCGGCGATCGTGCGGGGA             | JS20_1_Crispr_3_22        | PFR1, PFR2 |
| GCAAAACGACCAAAAGAGACAAGCCCTGAGTAAGCAAA              | JS20_1_Crispr_3_23        | -          |
| CGCGAGGTTCCCGTGAAACCAGGAGTAAGCGTTTCA                | JS20_1_Crispr_3_24        | -          |
| TGCGCCAAGTTCTTGCGGAGGATCTGCTCCTTGCCGTT              | JS20_1_Crispr_3_25        | -          |
| GCGACCGGGGAAGAGAATTCGAGCGTACTCCAGCATG               | JS20_1_Crispr_3_26        | -          |
| CTGTGGGGTGTGTGCATGGCGTCGAGTGAGGTGCG                 | JS20_1_Crispr_3_27        | -          |
| CGCGAGGTTCCCGTGCTCGGGTGAAGTTGTGGTGGCACC             | JS20_1_Crispr_3_28        | -          |
| TCGCTGGCTCGTGATCGCGGTGTCACCACAGGCGCCT               | JS20_1_Crispr_3_29        | -          |
| ACGTCCAAGCATTTCAAGTTCTGCGCCAATGCGCGCAT              | JS20_1_Crispr_3_30        | PFR1, PFR2 |
| AAGCTGGGTGGCAAGATCACCCGCACTGTCCAGGT                 | JS20_1_Crispr_3_31        | -          |
| GCATAGAGGCTGTAGATGCCATCGTCGGGGACGGT                 | JS20_1_Crispr_3_32        | -          |
| CCATCCTGGAAGAACTCGATGTCGTCATCCTTGTCCGGAC            | JS20_1_Crispr_3_33        | -          |
| AGCCGGTCCACGCCGTCGGCGGCCATGCCGGTGGT                 | JS20_1_Crispr_3_34        | -          |
| ATCAACCCCAATCGCGGCCAGTGGTATTCGCTGGCTCGT             | JS20_1_Crispr_3_35        | -          |
| ATGGCGTCGAGTGAGGTCGAGCGGTTGCGGGCTG                  | JS20_1_Crispr_3_36        | -          |
| ATCGGTGGCGTTCAAGACCCGATCCCTGACATTGCG                | JS20_1_Crispr_3_37        | -          |
| CATGAGATTGGGACACTTTCCTCCAGCGTTGTTCTG                | JS20_1_Crispr_4_1         | -          |
| CGCGATGTCGCTCACATTGACATTGGCACATGGA                  | JS20_1_Crispr_4_2         | -          |
| GTCATCATCGGCTGGCCGTTGCTGAACGTTCTCGGT                | JS20_1_Crispr_4_3         | -          |
| TGCGACACCGATTGCTGCACCTGATCACCGACGA                  | JS20_1_Crispr_4_4         | -          |
| AGCCCGATCAGATCGCAGAGGACCGCACCCCTACGCA               | JS20_1_Crispr_4_5         | -          |
| AGGCTTCAGGTCCGGCCTCGGCCACAGGATCGG                   | JS20_1_Crispr_5_1         | -          |
| CAGGGCCTGATCGAGCTATTTATCGAGCAGGTGCC                 | JS20_1_Crispr_5_2         | -          |
| GCTTCCGTTGGTGAACACCATTTTGGTTTGATTCCACTC             | JS20_1_Crispr_5_3         | -          |
| CTCGGCATGATGCCAGCGCCGATTATCGTGAGCGTATT              | JS20_1_Crispr_5_4         | -          |
| AAGATGAGCGGGCCGAGGGTTCGACCCGGGACGCGG                | JS20_1_Crispr_5_5         | -          |
| TGATGCCCCAGGCCGGCGCGCAACTGCTCACCGAGCTG              | JS20_1_Crispr_5_6         | -          |
| GTGAGCTCGGGCTGAGCGTGAGCCAGACAGCGGCAAAG              | JS20_1_Crispr_5_7         | -          |
| AACCTGTGGGGCTTCCCGGTTGTCGTCACGACCGC                 | JS20_1_Crispr_5_8         | -          |
| GCGAAAGAGCGATCATTCCGGGTATGGATCAAAC                  | JS20_1_Crispr_5_9         | -          |
| CACGGACTTGCCAGCAGTGTCGGCCTGCTTCAAC                  | JS20_1_PossibleCrispr_1_1 | -          |
| GGGGTCTGCAACGGGGTCAGCCCAACAAGCTGACCCACTGGATCCACCACA | JS20_1_PossibleCrispr_2_1 | -          |
| TGCCGGCTTGCCGTTGGACGCCGT                            | JS20_1_PossibleCrispr_6_1 | -          |
| TGCCAGCTTCTTGCCGCCCGGCTT                            | JS20_1_PossibleCrispr_6_2 | -          |
| CGTCGCCTTGCGGGTGGTGGC                               | JS20_1_PossibleCrispr_6_3 | -          |
| TGCCACCTGGCCAGAAACCTCTACCCCGAGCCCCTTGA              | JS21_1_PossibleCrispr_7_1 | -          |
| GGTTTGATCCATACCCGGAATGATCGCTCTTTGCG                 | JS21_1_Crispr_3_1         | -          |
| AATACGCTCACGATAATCGGCGCTGGCATCATGCCGA               | JS21_1_Crispr_3_2         | -          |
| CACCCGAGAGGCAGCACCAGGCCGAAGCGCGCCGACAT              | JS21_1_Crispr_3_3         | -          |
| TTTTGCCAGATAGATGGACGTGCCCGCGTCCACGACGA              | JS21_1_Crispr_3_4         | -          |

|                                         |                    |                 |
|-----------------------------------------|--------------------|-----------------|
| GAGTGGAATCAAACCAAATGGTGTTCACCAACGGAAGC  | JS21_1_Crispr_3_5  | -               |
| CTGTCAAATGGCGTGAGGTGAGCGGCGGTGCAGG      | JS21_1_Crispr_3_6  | -               |
| TGGCACCTGCTCGATAAATAAGCTCGATCAGGCCCTG   | JS21_1_Crispr_3_7  | -               |
| CCGATCCTGTGGGCCGAGGCCGACCTGAAGCCT       | JS21_1_Crispr_3_8  | -               |
| TGCGTAGGGTGCGGTCCTCTGCGATCTGATCGGGCT    | JS21_1_Crispr_4_1  | -               |
| TCGTCGGTGATCAGGTGCAGCGAATCGGTGTCGCA     | JS21_1_Crispr_4_2  | -               |
| ACCGAGAACGTTACGCAACGGCCAGCCGATGATGAC    | JS21_1_Crispr_4_3  | -               |
| TGCCGTGTGGGGCGGTGGTGGTGCTGCCTCCCAAT     | JS21_1_Crispr_4_4  | -               |
| AACCACAGCTACGTCTTCCGGTGTGCGCGCGGATA     | JS21_1_Crispr_4_5  | -               |
| TCCATGTGCCAATGTCAATGTGAGCGACATCGCG      | JS21_1_Crispr_4_6  | -               |
| CAGAACAACGCTGGAGGAAAGTGTCCCAATCTCATG    | JS21_1_Crispr_4_7  | -               |
| GCGAATGTCAGGGATCGGGTCTTGAACGCCACCGAT    | JS21_1_Crispr_5_1  | -               |
| CAGCCCCAACCCTCGACCTCACTCGACGCCAT        | JS21_1_Crispr_5_2  | -               |
| ACGAGCCAGCGAATACCACTGGCCGCGATTGGGGTTGAT | JS21_1_Crispr_5_3  | -               |
| GGCCTGCGCCTGGGGTTCGCCCCGCGCATGAAGTG     | JS21_1_Crispr_5_4  | -               |
| ACCACCGGCATGGCCGCCGACGGCGTGACCGGCT      | JS21_1_Crispr_5_5  | -               |
| GTCCGACAAGGATGACGACATCGAGTTCTTCCAGGATGG | JS21_1_Crispr_5_6  | -               |
| ACCGTCCCCGACGATGGCATCTACAGCCTCTATGC     | JS21_1_Crispr_5_7  | -               |
| ACCTGGACAGTGCGGGTGTCTTGCCACCCAGCTT      | JS21_1_Crispr_5_8  | -               |
| ATGCGCGCATTGGCGCAGAACTTGAAATGCTTGACGT   | JS21_1_Crispr_5_9  | PFR1, PFR2      |
| AGGCGCCTGTGGTGACACCGCGATCACGAGCCAGCGA   | JS21_1_Crispr_5_10 | -               |
| CGACCTCACTCGACGCCATGCACACACCCACAG       | JS21_1_Crispr_5_11 | -               |
| CATGCTGGAGTACGCTCGAATTCTTCCCCGGTCCG     | JS21_1_Crispr_5_12 | -               |
| AACGGCAAGGAGCAGATCCTCGCCAAGAAGTTGGCGCA  | JS21_1_Crispr_5_13 | -               |
| TCGAACGCTTACTCCTGGTTTCCACGGGAACCTCGCG   | JS21_1_Crispr_5_14 | -               |
| TTTGCTTACTCAGGGCTTGTCTCTTTGGTGGTTTTGC   | JS21_1_Crispr_5_15 | -               |
| TCCCCGCACGATCGCCGGAATGGTCACCGCTTCGGATGC | JS21_1_Crispr_5_16 | PFR1, PFR2      |
| TTATGGCGCTGCTTGGGACGCCGCTCAGATCGCCGCT   | JS21_1_Crispr_5_17 | -               |
| CGTTCTCGTGCTGAGCTACGGCATAACGGGGTGTG     | JS21_1_Crispr_5_18 | -               |
| AGTCGGGTGTAATCATTGACCTCCGCACCCGGCAAGCA  | JS21_1_Crispr_5_19 | -               |
| CGTCCATGTGTGAGCGAACCCACGCATCCTGACT      | JS21_1_Crispr_5_20 | -               |
| ACTTCGAGGATGCCGGCGAGGAAGCCGGTAGGAGT     | JS21_1_Crispr_5_21 | -               |
| GCGATCTCGGCGCTGGTGGGGGCGTTCTCGATTGC     | JS21_1_Crispr_5_22 | Doucette,<br>G4 |
| CAGATGAGCGAACTGGATTTTACCAATTGCTAGATG    | JS21_1_Crispr_5_23 | -               |
| GCGAGCCAATCGACATCGCCGGAAGGTTAGCGAGAAA   | JS21_1_Crispr_5_24 | Doucette,<br>E6 |
| CGGCATCATGTGATCACCCGACCCATGACCTGCTCCACG | JS21_1_Crispr_5_25 | -               |
| CGTACTCATTGTGTTTCTCCTAGAACTTTAACGT      | JS21_1_Crispr_5_26 | -               |
| GGTGAGAAATCCCGTCGCCGTACCGGGCGGAGCGTGA   | JS21_1_Crispr_5_27 | PFR1, PFR2      |
| GGTCATAGGTCGGATTATATCCGCCCCATGTGATTA    | JS21_1_Crispr_5_28 | -               |
| CTTGATATTGGGTCTGAGCTTGAGATTCAAGATATCAA  | JS21_1_Crispr_5_29 | -               |
| CTGTGCAGTCCGTCTCCACCGTGAAGCCGACAA       | JS21_1_Crispr_5_30 | -               |

|                                                  |                           |       |
|--------------------------------------------------|---------------------------|-------|
| AATCCGGACCAGTAATGTCAGGAATCTTGATCTT               | JS21_1_Crispr_5_31        | -     |
| CACGCGCTCAGGGTGAGGGCCCGTGGGATGGCTGGGT            | JS21_1_Crispr_5_32        | -     |
| CATTACTCATCGTGTCTTCTCCCTAGAACTTTAGTGT            | JS21_1_Crispr_5_33        | -     |
| CGGCTCGTTCACCGCATCCTTCGGGGGTGTCGGGGCAG           | JS21_1_Crispr_5_34        | -     |
| GGCAGCCGCGATGGCTCTGGTTGTCTTGCGCATGCAA            | JS21_1_Crispr_5_35        | -     |
| TCAAGAATTTTGTGAACTTTTGTGCGATTTCTACA              | JS21_1_Crispr_5_36        | -     |
| CCGAATCGACGTAGACAAGCCAGGTCTTCTTTCCGG             | JS21_1_Crispr_5_37        | -     |
| ACGCCCCCAGACAAAGCCGAACCTAGCGGAACCTGACC           | JS21_1_Crispr_5_38        | -     |
| ATTGCCATTTCGCTGCATCCCGCCAAGGGTGTCCGTA            | JS21_1_Crispr_5_39        | E6    |
| CTGGAGCGAAGGCGGGCTCCACGCCGCTCCTTGA               | JS21_1_PossibleCrispr_1_1 | -     |
| CGCACCACCCGCAAGGCGACG                            | JS21_1_PossibleCrispr_2_1 | -     |
| AAGCCGGCGGCCAAGAAGCCGGCA                         | JS21_1_PossibleCrispr_2_2 | -     |
| ACGGCGTCCACGGCCAAGCCGGCA                         | JS21_1_PossibleCrispr_2_3 | -     |
| AGCGCATGGGAGAAGGCCCGGCAGGACGCCGTGGAC             | JS22_Crispr_2_1           | -     |
| GGCACCGGGCTCGACGTGGACCAGATGATCGCAA               | JS22_Crispr_2_2           | -     |
| CGTACCCTCAATCGTGGACAGAGTCGTCTTGCCCA              | JS22_Crispr_2_3           | -     |
| GCATTTGCTTGCCATTGCTTCCTCCAATCTGCGT               | JS22_Crispr_2_4           | -     |
| CGCACCAAGGCCCGGCTCGGCGAGGGACGGTTGCCGT            | JS22_Crispr_2_5           | -     |
| GTCATGGTGTGCGCACAGAAACCTAGAGTTCGGGCGG            | JS22_Crispr_2_6           | -     |
| GCGAAAGAGCGATCATTCCGGGTATGGATCAAACC              | JS22_Crispr_2_7           | -     |
| CGCACCACCCGCAAGGCGACG                            | JS22_PossibleCrispr_1_1   | -     |
| AAGCCGGCGGCCAAGAAGCCGGCA                         | JS22_PossibleCrispr_1_2   | -     |
| ACGGCGTCCACGGCCAAGCCGGCA                         | JS22_PossibleCrispr_1_3   | -     |
| GCCGCACAACCTGCCACCTGGCCAGAACTCTACCCCGAGCCCCCTTGA | JS22_PossibleCrispr_3_1   | -     |
| TCAGAAACAGGCATACCAGATGTTAATGCAAGGGCTG            | JS23_Crispr_2_1           | -     |
| GACAGGACCACAGGCACGGTCTTGACCACAAGATC              | JS23_Crispr_2_2           | -     |
| CTCGTGAGGACCTCACTGACCAGCATCTGCCGCTGAG            | JS23_Crispr_2_3           | phiB5 |
| GCCCCGAACCCGACACCCAGCACCACCAAGACCCAC             | JS23_Crispr_2_4           | -     |
| GTTGAGCAGGTGGCAGAATGTACATGCCACGAGACG             | JS23_Crispr_2_5           | -     |
| TATACAGCCTTCTTCGTAGGAACGTCAACACCTCAG             | JS23_Crispr_2_6           | -     |
| GCGAAGGTGCGGCTGTTCAAGGACGACGGCGGCCCG             | JS23_Crispr_2_7           | -     |
| CCCACCCCTACACAACAGACGGCACGAGCCTCACAG             | JS23_Crispr_2_8           | -     |
| CATCCTGAATACATTCCGGGCTTGAGGACCAACGGT             | JS23_Crispr_2_9           | -     |
| GGTGCCGTTCCGATTGGTTCCGCCGTTTCGATAAG              | JS23_Crispr_2_10          | -     |
| ACGAAGACTGACCCACTCCAGGGACCGGCCCAAG               | JS23_Crispr_2_11          | -     |
| ACGACGATCCATAGTTCCCCAGAACCTCTCTAGCA              | JS23_Crispr_2_12          | -     |
| ACGTTCCGCACCCGGCGGGTATGACCACAACATT               | JS23_Crispr_2_13          | -     |
| CCGAAGCTCGCTCCTCTGATGAATGCCATCACTTCAGCG          | JS23_Crispr_2_14          | -     |
| GGGTCCGTAACAGCGGGATCGGGCACCCCTGCACCG             | JS23_Crispr_2_15          | -     |
| CGAACCGAGCTGCGCAACAAGCCCCATTCTTTGA               | JS23_Crispr_2_16          | -     |
| GGGCAGGTGTGGGAAGACGACTGGGCAGAACTCGCTAA           | JS23_Crispr_2_17          | -     |
| CCGGCTCTTCAAGGCTGTCCGACCAGACGGGGCCG              | JS23_Crispr_2_18          | -     |



|                                          |                         |                                              |
|------------------------------------------|-------------------------|----------------------------------------------|
| CCCGACAAATTTCTCGCAAGCGGGCCGCGCACGCG      | JS23_Crispr_2_19        | Anatole,<br>B22, B3, E1,<br>E6, G4;<br>PJS23 |
| TTCTCCTGAAATGCCGTTGTGGCATCAATAGTAGG      | JS23_Crispr_2_20        | -                                            |
| TGGGCTTCTCCTGTGTGAGCTGAATTTGCTCGACAG     | JS23_Crispr_2_21        | -                                            |
| GGCGACAGTGCGCATGTGATCCGGTTCGGTCTTGA      | JS23_Crispr_2_22        | -                                            |
| TCAAAGGAGCATGCCATGAACACCACGGTTGTCGA      | JS23_Crispr_2_23        | -                                            |
| GTGGCGGCGAGGGCTTCCCAGCGGCGCAGGAGCCGGACC  | JS23_Crispr_2_24        | -                                            |
| GTGAGCTCGGGCTGAGCGTGAGCCAGACAGCGGCAAAG   | JS23_Crispr_2_25        | -                                            |
| GCATTTGCTTGCCATTTGCTTCTCCAATCTGCGT       | JS23_Crispr_2_26        | -                                            |
| CGCACCAAGGCCCGGCTCGGCGAGGGACGGTTGCCGT    | JS23_Crispr_2_27        | -                                            |
| CGCACCCCGCAAGGCGACG                      | JS23_PossibleCrispr_1_1 | -                                            |
| ACGGCAGCTGCCAAGAAGCCGGCA                 | JS23_PossibleCrispr_1_2 | -                                            |
| GCTACGTCCTCGGCGTCC                       | JS23_PossibleCrispr_1_3 | -                                            |
| ACTGAAACCAACTCCGCAGTATAACGAGCTTCCAT      | JS25_Crispr_2_1         | -                                            |
| TACCGACACCCTTGGCGGGATGCAGCGAATGGCAAT     | JS25_Crispr_2_2         | E6                                           |
| GGTCAAGTTCGCTAGGTTGCGCTTTGTCTGGGGCGT     | JS25_Crispr_2_3         | -                                            |
| CCGAAAGAAGACCTGGCTTGTCTACGTCGATTCCG      | JS25_Crispr_2_4         | -                                            |
| TGTAGAAATCGACAAAAGTTTCAACAAAATTCTTGAA    | JS25_Crispr_2_5         | -                                            |
| TTGCATGCGCAAGACAACCAGAGCCATCGCGGCTGCC    | JS25_Crispr_2_6         | -                                            |
| CTGCCCCGACACCCCGAAGGATGCGGTGAACGAGCCG    | JS25_Crispr_2_7         | -                                            |
| ACACTAAAGTTCTAGGGAGAAACACGATGAGTAATG     | JS25_Crispr_2_8         | -                                            |
| ACCCAGCCATCCACGGGCCCTCACCTGAGCGCGTG      | JS25_Crispr_2_9         | -                                            |
| AAGATCAAGATTCTGACACTTGGTCCGGATT          | JS25_Crispr_2_10        | -                                            |
| TTGTCGGCTTCCACGGTGGAGACGGACTGCACAG       | JS25_Crispr_2_11        | -                                            |
| TTGATATCTGAATCTCAAGCTCAGACCCAATATCAAG    | JS25_Crispr_2_12        | -                                            |
| TTTAATCACATGGGGCGGATATAATCCGACCTATGACC   | JS25_Crispr_2_13        | -                                            |
| TCACGCTCGCGCCCGGTACGGGCGACGGGATTCTACC    | JS25_Crispr_2_14        | PFR1, PFR2                                   |
| ACGTAAAGTTCTAGGAGAAACACAATGAGTAACG       | JS25_Crispr_2_15        | -                                            |
| CGTGGGAGCAGGTCATGGGTGCGGTGATCACATGATGCCG | JS25_Crispr_2_16        | -                                            |
| TTTCTCGCTAACCTTCCGGGCGATGTCGATTGGCTCGC   | JS25_Crispr_2_17        | Doucette,<br>E6                              |
| CATCTAGCAATTGGTAAAAATCCAGTTCGCTCATCTG    | JS25_Crispr_2_18        | -                                            |
| GCAATCGAGAACGCCCCACCAGCGCCGAGATCGC       | JS25_Crispr_2_19        | PFR1, PFR2                                   |
| ACTCCTACCGGCTTCTCGCCGGCATCCTCGAAGT       | JS25_Crispr_2_20        | -                                            |
| AGTCAGGATGCGTGGGTTGCTCACACATGGACG        | JS25_Crispr_2_21        | -                                            |
| TGCTTGCCGGGTGCGGAGGTCAATGATTACACCCGACT   | JS25_Crispr_2_22        | -                                            |
| GACACCCGTATGCCGTAGCTCAGCACGAGAACG        | JS25_Crispr_2_23        | -                                            |
| AGCGGCGATCTGAGCGGCGTCCAAGCAGCGCCATAA     | JS25_Crispr_2_24        | -                                            |
| GCATCCGAAGCGGTGACCATTCCGGCGATCGTGCGGGGA  | JS25_Crispr_2_25        | PFR1, PFR2                                   |
| GCAAAACGACCAAAAGAGACAAGCCCTGAGTAAGCAAA   | JS25_Crispr_2_26        | -                                            |
| CGCGAGGTTCCCGTGAAACCAGGAGTAAGCGTTCCA     | JS25_Crispr_2_27        | -                                            |

|                                         |                         |            |
|-----------------------------------------|-------------------------|------------|
| TGCGCCAAGTTCTTGGCGAGGATCTGCTCCTTGCCGTT  | JS25_Crispr_2_28        | -          |
| GCGACCGGGGAAGAGAATTCGAGCGTACTCCAGCATG   | JS25_Crispr_2_29        | -          |
| CTGTGGGGTGTGTGCATGGCGTCGAGTGAGGTCG      | JS25_Crispr_2_30        | -          |
| TCGCTGGCTCGTGATCGCGGTGTCACACAGGCGCCT    | JS25_Crispr_2_31        | -          |
| ACGTCCAAGCATTTCAAGTTCTGCGCCAATGCGCGCAT  | JS25_Crispr_2_32        | PFR1, PFR2 |
| AAGCTGGGTGGCAAGATCACCCGCACTGTCCAGGT     | JS25_Crispr_2_33        | -          |
| GCATAGAGGCTGTAGATGCCATCGTCGGGGACGGT     | JS25_Crispr_2_34        | -          |
| CCATCCTGGAAGAACTCGATGTCGTCATCCTTGTCGGAC | JS25_Crispr_2_35        | -          |
| AGCCGGTCCACGCCGTCGGCGGCCATGCCGGTGGT     | JS25_Crispr_2_36        | -          |
| CAC TTCATGCGCGGGGGCGACCCCAAGCGCAGGCC    | JS25_Crispr_2_37        | -          |
| ATCAACCCCAATCGCGGCCAGTGGTATTCGCTGGCTCGT | JS25_Crispr_2_38        | -          |
| ATGGCGTCGAGTGAGGTCGAGCGGTTGCGGGCTG      | JS25_Crispr_2_39        | -          |
| ATCGGTGGCGTTCAAGACCCGATCCCTGACATTCGC    | JS25_Crispr_2_40        | -          |
| CATGAGATTGGGACACTTTCCTCCAGCGTTGTTCTG    | JS25_Crispr_3_1         | -          |
| CGCGATGTCGCTCACATTGACATTGGCACATGGA      | JS25_Crispr_3_2         | -          |
| TATCCGCGCCGACACCGGAAGACGTAGCTGTGGTT     | JS25_Crispr_3_3         | -          |
| ATTGGGGAGGCAGCACACCACCACCGCCCCACACGGCA  | JS25_Crispr_3_4         | -          |
| TGCGACACCGATTGCTGCACCTGATCACCGACGA      | JS25_Crispr_3_5         | -          |
| AGCCCGATCAGATCGCAGAGGACCGCACCCCTACGCA   | JS25_Crispr_3_6         | -          |
| AGGCTTCAGGTCCGGCCTCGGCCACAGGATCGG       | JS25_Crispr_4_1         | -          |
| CAGGGCCTGATCGAGCTTATTTATCGAGCAGGTGCC    | JS25_Crispr_4_2         | -          |
| CCCTGCACCGCCGCTCACCTCACGCCATTCGACAG     | JS25_Crispr_4_3         | -          |
| GCTTCCGTTGGTGAACACCATTTTGGTTTGATTCCACTC | JS25_Crispr_4_4         | -          |
| TCGTCGTGGACGCCGGGCACGTCCATCTATCTGGCAAA  | JS25_Crispr_4_5         | -          |
| CATGTGCGCGCGCTTCGGCCTGGTGTGCTGCTGCGGGTG | JS25_Crispr_4_6         | -          |
| TCGGCATGATGCCAGCGCCGATTATCGTGAGCGTATT   | JS25_Crispr_4_7         | -          |
| GCGAAAGAGCGATCATTCCGGGTATGGATCAAACC     | JS25_Crispr_4_8         | -          |
| CGCACCAACCGCAAGGCGACG                   | JS25_PossibleCrispr_1_1 | -          |
| AAGCCGGCGGCCAAGAAGCCGGCA                | JS25_PossibleCrispr_1_2 | -          |
| ACGGCGTCCACGGCCAAGCCGGCA                | JS25_PossibleCrispr_1_3 | -          |
| TCAAGGAGCGGCGTGGAGCCCGCCTTCGCTCCAG      | JS25_PossibleCrispr_5_1 | -          |
