# Supplementary material for: De novo assembly of genomes from long sequence reads reveals uncharted territories of Propionibacterium freudenreichii
Source: PubMed Central journal article supplement (PMC5644110; doi:10.1186/s12864-017-4165-9), 2017-10-16
Supplement: 12864_2017_4165_MOESM28_ESM.pdf [file 12864_2017_4165_MOESM28_ESM.pdf]

The B12 riboswitch located upstream two B12 operons and the B12-dependent Methylmalonyl Co-A mutase (*mutA*). The conserved sequence SAGYCMSAMRMBCYGCCD constituting the B12-box is framed.

```

B12el_cbiL1681393-1681540_JS2_rev      -CCGGATGATCGATGTGGAAGACTGAGCGCGGCAACGAGCGCG--AGGAATGCCCGGTGAC
B12el_cbiB_1203248-1203397_JS2_re     -----CGGCCAGC---GCGCGTCCGC-----AGCGAAGCCGGT---
B12el_mutA_1681647-1681844_JS2_fw      CTAGTAGTGTGGTTCGGCTGCC---CCACGGCAGTCGTTCGCAAGAGGGAATCCGGT---
                                         **      *      *  *  *      *  *  *  *  *  *  *  *  *  *  *  *  *
                                         *  *  *  *  *  *  *  *  *  *  *  *  *  *  *  *  *  *  *

B12el_cbiL1681393-1681540_JS2_rev      CGGGGGCCATGGCCGCCCGGGAGTCCGCGACGGTCCCGCCACTGTGAGCCGGTGAAGCC-
B12el_cbiB_1203248-1203397_JS2_re     -----GGGAATCCGGCACTGTCCCGCAACGGTATGGGGCCCGGCC
B12el_mutA_1681647-1681844_JS2_fw      -----GTAATTCGGAACGTCCCGCAGCGTCAATGGGAACGACAC
                                         *  *  *  *  *  *  *  *  *  *  *  *  *  *  *  *  *  *  *

B12el_cbiL1681393-1681540_JS2_rev      -----
B12el_cbiB_1203248-1203397_JS2_re     CGAGTCCGGT-----CGACTG-----TGGACGTGTCC
B12el_mutA_1681647-1681844_JS2_fw      AACGTAAGGCACCTGGGCGGCAACGCCTGGGAAGTAGTAGTGGAGGAAGTCGGGAGTGATC

B12el_cbiL1681393-1681540_JS2_rev      -----GGCGAGTCAGACACTCCGCCGGTGCCTGCGCTGAC
B12el_cbiB_1203248-1203397_JS2_re     CCACATTGCCCGGCGCAAGGTCCAGCCCACGAGCTGCCTCCGCGTGCACC
B12el_mutA_1681647-1681844_JS2_fw      TCGCAATGCC-----ATGAGTCCGAAGACCTGCCACGAGCGACAAC
                                         *  *  *  *  *  *  *  *  *  *  *  *  *  *  *  *  *  *  *

```

The BLASTn alignment table for all of the B12 elements identified from the newly sequenced *P. freudenreichii* strains and the *P. freudenreichii* DSM 20271 (JS16).

| qseqid     | sseqid | pident | length | mismatch | gapopen | qstart | qend | sstart  | send    | evalue   | bitscore |
|------------|--------|--------|--------|----------|---------|--------|------|---------|---------|----------|----------|
| B12el_CbiL | JS9    | 100    | 148    | 0        | 0       | 1      | 148  | 1841300 | 1841447 | 3.00E-73 | 274      |
| B12el_CbiL | JS8    | 100    | 148    | 0        | 0       | 1      | 148  | 1754668 | 1754815 | 3.00E-73 | 274      |
| B12el_CbiL | JS7    | 100    | 148    | 0        | 0       | 1      | 148  | 1763169 | 1763316 | 3.00E-73 | 274      |
| B12el_CbiL | JS4    | 100    | 148    | 0        | 0       | 1      | 148  | 1384368 | 1384515 | 3.00E-73 | 274      |
| B12el_CbiL | JS2    | 100    | 148    | 0        | 0       | 1      | 148  | 1681393 | 1681540 | 3.00E-73 | 274      |
| B12el_CbiL | JS25   | 100    | 148    | 0        | 0       | 1      | 148  | 1607956 | 1608103 | 3.00E-73 | 274      |
| B12el_CbiL | JS21   | 100    | 148    | 0        | 0       | 1      | 148  | 1746056 | 1746203 | 3.00E-73 | 274      |
| B12el_CbiL | JS20   | 100    | 148    | 0        | 0       | 1      | 148  | 971625  | 971478  | 3.00E-73 | 274      |
| B12el_CbiL | JS18   | 100    | 148    | 0        | 0       | 1      | 148  | 1296043 | 1295896 | 3.00E-73 | 274      |
| B12el_CbiL | JS16   | 100    | 148    | 0        | 0       | 1      | 148  | 852708  | 852561  | 3.00E-73 | 274      |
| B12el_CbiL | JS14   | 100    | 148    | 0        | 0       | 1      | 148  | 1666592 | 1666739 | 3.00E-73 | 274      |
| B12el_CbiL | JS13   | 100    | 148    | 0        | 0       | 1      | 148  | 1705557 | 1705704 | 3.00E-73 | 274      |
| B12el_CbiL | JS12   | 100    | 148    | 0        | 0       | 1      | 148  | 1751280 | 1751427 | 3.00E-73 | 274      |
| B12el_CbiL | JS11   | 100    | 148    | 0        | 0       | 1      | 148  | 1705587 | 1705734 | 3.00E-73 | 274      |
| B12el_CbiL | JS10   | 100    | 148    | 0        | 0       | 1      | 148  | 1602802 | 1602949 | 3.00E-73 | 274      |
| B12el_CbiL | JS23   | 99.3   | 143    | 0        | 1       | 1      | 142  | 1695548 | 1695690 | 3.00E-68 | 257      |
| B12el_CbiL | JS22   | 99.3   | 143    | 0        | 1       | 1      | 142  | 1728974 | 1729116 | 3.00E-68 | 257      |
| B12el_CbiL | JS17   | 99.3   | 143    | 0        | 1       | 1      | 142  | 1797087 | 1797229 | 3.00E-68 | 257      |
| B12el_CbiL | JS15   | 99.3   | 143    | 0        | 1       | 1      | 142  | 877850  | 877708  | 3.00E-68 | 257      |
| B12el_cbiB | JS8    | 100    | 150    | 0        | 0       | 1      | 150  | 1233114 | 1233263 | 2.00E-74 | 278      |

|            |      |       |     |   |   |   |     |         |         |           |     |
|------------|------|-------|-----|---|---|---|-----|---------|---------|-----------|-----|
| B12el_cbiB | JS7  | 100   | 150 | 0 | 0 | 1 | 150 | 1246455 | 1246604 | 2.00E-74  | 278 |
| B12el_cbiB | JS2  | 100   | 150 | 0 | 0 | 1 | 150 | 1203248 | 1203397 | 2.00E-74  | 278 |
| B12el_cbiB | JS25 | 100   | 150 | 0 | 0 | 1 | 150 | 1091201 | 1091350 | 2.00E-74  | 278 |
| B12el_cbiB | JS23 | 100   | 150 | 0 | 0 | 1 | 150 | 1160583 | 1160732 | 2.00E-74  | 278 |
| B12el_cbiB | JS22 | 100   | 150 | 0 | 0 | 1 | 150 | 1235175 | 1235324 | 2.00E-74  | 278 |
| B12el_cbiB | JS21 | 100   | 150 | 0 | 0 | 1 | 150 | 1237340 | 1237489 | 2.00E-74  | 278 |
| B12el_cbiB | JS18 | 100   | 150 | 0 | 0 | 1 | 150 | 1786790 | 1786641 | 2.00E-74  | 278 |
| B12el_cbiB | JS17 | 100   | 150 | 0 | 0 | 1 | 150 | 1280961 | 1281110 | 2.00E-74  | 278 |
| B12el_cbiB | JS16 | 100   | 150 | 0 | 0 | 1 | 150 | 1124460 | 1124609 | 2.00E-74  | 278 |
| B12el_cbiB | JS15 | 100   | 150 | 0 | 0 | 1 | 150 | 1371988 | 1371839 | 2.00E-74  | 278 |
| B12el_cbiB | JS14 | 100   | 150 | 0 | 0 | 1 | 150 | 1189715 | 1189864 | 2.00E-74  | 278 |
| B12el_cbiB | JS13 | 100   | 150 | 0 | 0 | 1 | 150 | 1195116 | 1195265 | 2.00E-74  | 278 |
| B12el_cbiB | JS12 | 100   | 150 | 0 | 0 | 1 | 150 | 1191080 | 1191229 | 2.00E-74  | 278 |
| B12el_cbiB | JS11 | 100   | 150 | 0 | 0 | 1 | 150 | 1195146 | 1195295 | 2.00E-74  | 278 |
| B12el_cbiB | JS10 | 100   | 150 | 0 | 0 | 1 | 150 | 1112048 | 1112197 | 2.00E-74  | 278 |
| B12el_cbiB | JS4  | 99.33 | 150 | 0 | 1 | 1 | 150 | 877469  | 877617  | 3.00E-72  | 270 |
| B12el_cbiB | JS9  | 98.67 | 150 | 2 | 0 | 1 | 150 | 1268797 | 1268946 | 4.00E-71  | 267 |
| B12el_cbiB | JS20 | 98.67 | 150 | 2 | 0 | 1 | 150 | 1510211 | 1510062 | 4.00E-71  | 267 |
| B12el_cbiB | JS20 | 98.67 | 150 | 2 | 0 | 1 | 150 | 1506091 | 1505942 | 4.00E-71  | 267 |
| B12el_MutA | JS9  | 100   | 198 | 0 | 0 | 1 | 198 | 1841554 | 1841751 | 6.00E-101 | 366 |
| B12el_MutA | JS8  | 100   | 198 | 0 | 0 | 1 | 198 | 1754922 | 1755119 | 6.00E-101 | 366 |
| B12el_MutA | JS7  | 100   | 198 | 0 | 0 | 1 | 198 | 1763423 | 1763620 | 6.00E-101 | 366 |
| B12el_MutA | JS4  | 100   | 198 | 0 | 0 | 1 | 198 | 1384622 | 1384819 | 6.00E-101 | 366 |
| B12el_MutA | JS2  | 100   | 198 | 0 | 0 | 1 | 198 | 1681647 | 1681844 | 6.00E-101 | 366 |
| B12el_MutA | JS25 | 100   | 198 | 0 | 0 | 1 | 198 | 1608210 | 1608407 | 6.00E-101 | 366 |
| B12el_MutA | JS23 | 100   | 198 | 0 | 0 | 1 | 198 | 1695799 | 1695996 | 6.00E-101 | 366 |
| B12el_MutA | JS22 | 100   | 198 | 0 | 0 | 1 | 198 | 1729225 | 1729422 | 6.00E-101 | 366 |
| B12el_MutA | JS21 | 100   | 198 | 0 | 0 | 1 | 198 | 1746310 | 1746507 | 6.00E-101 | 366 |
| B12el_MutA | JS20 | 100   | 198 | 0 | 0 | 1 | 198 | 971371  | 971174  | 6.00E-101 | 366 |
| B12el_MutA | JS18 | 100   | 198 | 0 | 0 | 1 | 198 | 1295789 | 1295592 | 6.00E-101 | 366 |
| B12el_MutA | JS17 | 100   | 198 | 0 | 0 | 1 | 198 | 1797338 | 1797535 | 6.00E-101 | 366 |
| B12el_MutA | JS16 | 100   | 198 | 0 | 0 | 1 | 198 | 852454  | 852257  | 6.00E-101 | 366 |
| B12el_MutA | JS15 | 100   | 198 | 0 | 0 | 1 | 198 | 877599  | 877402  | 6.00E-101 | 366 |
| B12el_MutA | JS14 | 100   | 198 | 0 | 0 | 1 | 198 | 1666846 | 1667043 | 6.00E-101 | 366 |
| B12el_MutA | JS13 | 100   | 198 | 0 | 0 | 1 | 198 | 1705811 | 1706008 | 6.00E-101 | 366 |

|            |      |       |     |   |   |   |     |         |         |           |     |
|------------|------|-------|-----|---|---|---|-----|---------|---------|-----------|-----|
| B12el_MutA | JS11 | 100   | 198 | 0 | 0 | 1 | 198 | 1705841 | 1706038 | 6.00E-101 | 366 |
| B12el_MutA | JS10 | 100   | 198 | 0 | 0 | 1 | 198 | 1603056 | 1603253 | 6.00E-101 | 366 |
| B12el_MutA | JS12 | 98.99 | 198 | 2 | 0 | 1 | 198 | 1751534 | 1751731 | 1.00E-97  | 355 |
