# Supplementary material for: De novo assembly of genomes from long sequence reads reveals uncharted territories of Propionibacterium freudenreichii
Source: BMC Genomics. 2017 Oct 16;18:790. doi: 10.1186/s12864-017-4165-9 (PMC5644110; doi:10.1186/s12864-017-4165-9)
Supplement: Supplementary file 11 — Annotation file of the strain JS13 with the cumulative results of bioinformatics analyses. (XLSX 307 kb) [file 12864_2017_4165_MOESM11_ESM.xlsx]

## Sheet: LT618779
No.	Prodigal ID	product name	gene start	gene stop	strand	PROKKA ID	product name	gene start	gene stop	strand	eC_number	gene_name	database similar protein	note	Core	Island Viewer Predicted by at least one method	IV SIGI	IV Island Path	IV Island Pick	Prophinder	Phaster	Rebase	CRISPR
1	PFR_JS13-1_1	Chromosomal replication initiator protein DnaA	1	1467	+	PROKKA_00001	Chromosomal replication initiator protein DnaA	61	1467	+		dnaA	similar to AA sequence:UniProtKB:Q9ZH75		1	0	0	0	0	0	0
2	PFR_JS13-1_2	Drug resistance transporter, EmrB/QacA subfamily	1442	2911	-	PROKKA_00002	Multidrug export protein EmrB	1442	2911	-		emrB_1	similar to AA sequence:UniProtKB:P0AEJ0	Putative antibiotic resistance	1	0	0	0	0	0	0
3	PFR_JS13-1_3	Transcriptional regulator, MerR family	3153	3770	+	PROKKA_00003	hypothetical protein	3153	3770	+					1	0	0	0	0	0	0
4	PFR_JS13-1_4	SqdX	3767	4948	-	PROKKA_00004	GDP-mannose-dependent alpha-mannosyltransferase	3767	4948	-	2.4.1.-	mgtA_1	similar to AA sequence:UniProtKB:Q8NT41		1	0	0	0	0	0	0
5	PFR_JS13-1_5	Sulfolipid (UDP-sulfoquinovose) biosynthesis	4962	6209	-	PROKKA_00005	NAD dependent epimerase/dehydratase family protein	4962	6209	-			protein motif:Pfam:PF01370.15		1	0	0	0	0	0	0
6	PFR_JS13-1_6	ABC transport system ATP-binding protein	6680	7624	+	PROKKA_00006	ABC transporter ATP-binding protein YxdL	6680	7624	+		yxdL	similar to AA sequence:UniProtKB:P42423		0	0	0	0	0	0	0
7	PFR_JS13-1_7	ABC lipoprotein transporter, permease component	7626	10184	+	PROKKA_00007	ABC transporter permease YtrF precursor	7626	10184	+		ytrF_1	similar to AA sequence:UniProtKB:O35005		0	0	0	0	0	0	0
8	PFR_JS13-1_8	Hypothetical protein	11156	11932	-	PROKKA_00008	hypothetical protein	11156	11932	-					0	0	0	0	0	0	0
9	PFR_JS13-1_9	DNA polymerase III, beta subunit	12060	13220	+	PROKKA_00009	DNA polymerase III subunit beta	12060	13220	+	2.7.7.7	dnaN	similar to AA sequence:UniProtKB:Q50790		1	0	0	0	0	0	0
10	PFR_JS13-1_10	DNA replication and repair protein RecF	13294	14595	+	PROKKA_00010	DNA replication and repair protein RecF	13294	14595	+		recF	similar to AA sequence:UniProtKB:Q9RVE0		1	0	0	0	0	0	0
11	PFR_JS13-1_11	Hypothetical protein	14624	15370	+	PROKKA_00011	hypothetical protein	14624	15370	+			protein motif:CLUSTERS:PRK03195		1	0	0	0	0	0	0
12	PFR_JS13-1_12	Hypothetical protein	15623	17176	+	PROKKA_00012	hypothetical protein	15623	17176	+			protein motif:Pfam:PF00395.14	S-layer homology domain	0	0	0	0	0	0	0
13	PFR_JS13-1_13	Hypothetical protein	17571	18545	+	PROKKA_00013	hypothetical protein	17571	18545	+					0	0	0	0	0	0	0
14	PFR_JS13-1_14	DNA gyrase, B subunit	18966	21008	+	PROKKA_00014	DNA gyrase subunit B	18966	21008	+	5.99.1.3	gyrB	similar to AA sequence:UniProtKB:P0C5C5		1	0	0	0	0	0	0
15	PFR_JS13-1_15	DNA gyrase, A subunit	21055	23790	+	PROKKA_00015	DNA gyrase subunit A	21055	23790	+	5.99.1.3	gyrA_1	similar to AA sequence:UniProtKB:Q07702		1	0	0	0	0	0	0
16	PFR_JS13-1_16	Hypothetical protein	24114	24896	+	PROKKA_00016	hypothetical protein	24114	24896	+					1	0	0	0	0	0	0
17	PFR_JS13-1_17	PF07561 domain protein	25027	25302	-	PROKKA_00017	hypothetical protein	25027	25302	-					1	0	0	0	0	0	0
18	PFR_JS13-1_18	UPF0103 protein	25543	26340	+	PROKKA_00018	hypothetical protein	25543	26340	+			protein motif:CLUSTERS:PRK00782		1	0	0	0	0	0	0
19	PFR_JS13-1_19	AMMECR1 domain protein	26404	26976	+	PROKKA_00019	hypothetical protein	26404	26976	+			protein motif:CLUSTERS:PRK00801		1	0	0	0	0	0	0
20	PFR_JS13-1_20	Pyruvate formate lyase activating protein pflA	26973	28061	+	PROKKA_00020	4-hydroxyphenylacetate decarboxylase activating enzyme	26973	28061	+	1.97.1.-	csdA	similar to AA sequence:UniProtKB:Q38HX2		1	0	0	0	0	0	0
21	PFR_JS13-1_21	Integral membrane protein	28218	28736	+	PROKKA_00021	hypothetical protein	28218	28736	+					1	0	0	0	0	0	0
22						PROKKA_00022	tRNA-Ile(gat)	28810	28885	+			COORDINATES:profile:Aragorn:1.2		0					0	0
23	PFR_JS13-1_22	Hypothetical protein	28974	29420	+	PROKKA_00023	hypothetical protein	28974	29420	+					1	0	0	0	0	0	0
24	PFR_JS13-1_23	Hypothetical protein	29435	29893	+	PROKKA_00024	hypothetical protein	29435	29893	+					1	0	0	0	0	0	0
25	PFR_JS13-1_24	Hypothetical protein	29930	30340	-	PROKKA_00025	hypothetical protein	29930	30340	-					1	0	0	0	0	0	0
26	PFR_JS13-1_25	Transcriptional regulator	30613	31395	+	PROKKA_00026	Catabolite control protein A	30613	31395	+		ccpA	similar to AA sequence:UniProtKB:P46828		1	0	0	0	0	0	0
27	PFR_JS13-1_26	Hypothetical protein	31530	31688	+	PROKKA_00027	hypothetical protein	31530	31688	+					0	0	0	0	0	0	0
28	PFR_JS13-1_27	Oxidoreductase, NAD-binding domain protein	32066	33256	+	PROKKA_00028	1,5-anhydro-D-fructose reductase	32066	33256	+	1.1.1.292	afr_1	similar to AA sequence:UniProtKB:Q2I8V6		0	0	0	0	0	0	0
29	PFR_JS13-1_28	MFS transporter, sugar porter family protein	33273	34925	+	PROKKA_00029	Major myo-inositol transporter IolT	33273	34925	+		iolT_1	similar to AA sequence:UniProtKB:O34718		0	0	0	0	0	0	0
30	PFR_JS13-1_29	Two-component system response regulator	35161	35820	-	PROKKA_00030	Oxygen regulatory protein NreC	35161	35820	-		nreC_1	similar to AA sequence:UniProtKB:Q7WZY4		1	0	0	0	0	0	0
31	PFR_JS13-1_30	Two-component system sensor kinase	35817	37319	-	PROKKA_00031	Sensor histidine kinase DesK	35817	37319	-	2.7.13.3	desK_1	similar to AA sequence:UniProtKB:O34757		1	0	0	0	0	0	0
32	PFR_JS13-1_31	Alpha-ketoglutarate transporter, MFS super	37521	38855	-	PROKKA_00032	Alpha-ketoglutarate permease	37521	38855	-		kgtP_1	similar to AA sequence:UniProtKB:P0AEX3		1	0	0	0	0	0	0
33	PFR_JS13-1_32	Peptidase M20D, amidohydrolase	38874	40085	-	PROKKA_00033	putative hydrolase YxeP	38874	40085	-	3.-.-.-	yxeP_1	similar to AA sequence:UniProtKB:P54955		1	0	0	0	0	0	0
34	PFR_JS13-1_33	ABC transporter	40374	42266	+	PROKKA_00034	Putative multidrug export ATP-binding/permease protein	40374	42266	+	3.6.3.-		similar to AA sequence:UniProtKB:Q99T13	Putative antibiotic resistance	1	0	0	0	0	0	0
35	PFR_JS13-1_34	ABC transporter related protein	42266	44233	+	PROKKA_00035	Putative multidrug export ATP-binding/permease protein	42266	44233	+	3.6.3.-		similar to AA sequence:UniProtKB:Q99T13	Putative antibiotic resistance	0	0	0	0	0	0	0
36	PFR_JS13-1_35	Alanine dehydrogenase	44457	45572	+	PROKKA_00036	Alanine dehydrogenase	44457	45572	+	1.4.1.1	ald	similar to AA sequence:UniProtKB:Q8KY18		1	0	0	0	0	0	0
37	PFR_JS13-1_36	Amino acid permease	45941	47479	+	PROKKA_00037	D-serine/D-alanine/glycine transporter	45941	47479	+		cycA_1	similar to AA sequence:UniProtKB:P0AAE0		1	0	0	0	0	0	0
38	PFR_JS13-1_37	Putative conserved lipoprotein lppS	47709	48908	-	PROKKA_00038	Putative L,D-transpeptidase LppS precursor	47709	48908	-	2.-.-.-	lppS	similar to AA sequence:UniProtKB:Q8NMT9		1	0	0	0	0	0	0
39	PFR_JS13-1_38	Hypothetical protein	48923	49063	+	PROKKA_00039	hypothetical protein	48923	49063	+					0	0	0	0	0	0	0
40	PFR_JS13-1_39	Hypothetical protein	49296	49583	+	PROKKA_00040	Acylphosphatase	49296	49583	+	3.6.1.7	acyP	similar to AA sequence:UniProtKB:O35031		0	0	0	0	0	0	0
41	PFR_JS13-1_40	Cytotoxic translational repressor of	49604	49864	-	PROKKA_00041	Toxin RelG	49604	49864	-	3.1.-.-	relG	similar to AA sequence:UniProtKB:O33348		0	0	0	0	0	0	0
42	PFR_JS13-1_41	Hypothetical protein	49861	50166	-	PROKKA_00042	Phd_YefM	49861	50166	-			protein motif:Pfam:PF02604.13		0	0	0	0	0	0	0
43	PFR_JS13-1_42	IMPACT family member yvyE	50296	50955	-	PROKKA_00043	IMPACT family member YigZ	50296	50955	-		yigZ	similar to AA sequence:UniProtKB:P27862		0	0	0	0	0	0	0
44	PFR_JS13-1_43	Nitroreductase	51079	51588	+	PROKKA_00044	malonic semialdehyde reductase	51079	51588	+			protein motif:CLUSTERS:PRK05365		0	0	0	0	0	0	0
45	PFR_JS13-1_44	Putative membrane protein	51667	52926	+	PROKKA_00045	hypothetical protein	51667	52926	+					0	0	0	0	0	0	0
46	PFR_JS13-1_45	Glycosyltransferase, family 2	52944	53798	-	PROKKA_00046	Chondroitin synthase	52944	53798	-		kfoC	similar to AA sequence:UniProtKB:Q8L0V4		0	1	1	0	0	0	0
47	PFR_JS13-1_46	UDP N-acetyl glucosamine 4-epimerase, NAD	53803	54750	-	PROKKA_00047	dTDP-4-dehydro-6-deoxyglucose reductase	53803	54750	-	1.1.1.266	fcf1	similar to AA sequence:UniProtKB:Q6E7F2		0	1	1	0	0	0	0
48	PFR_JS13-1_47	Glycosyltransferase	54751	55833	-	PROKKA_00048	Undecaprenyl-phosphate 4-deoxy-4-formamido-L-arabinose transferase	54751	55833	-	2.4.2.53	arnC	similar to AA sequence:UniProtKB:Q93PD9		0	1	1	0	0	0	0
49	PFR_JS13-1_48	Integral membrane protein (Precursor)	55830	58268	-	PROKKA_00049	hypothetical protein	55830	58268	-					0	1	1	0	0	0	0
50	PFR_JS13-1_49	Conserved domain protein	58265	60385	-	PROKKA_00050	hypothetical protein	58265	60385	-					0	1	1	0	0	0	0
51	PFR_JS13-1_50	Glucose-1-phosphate thymidylyltransferase	60480	61349	-	PROKKA_00051	Glucose-1-phosphate thymidylyltransferase	60480	61349	-	2.7.7.24	rmlA	similar to AA sequence:UniProtKB:A0QPF9		0	0	0	0	0	0	0
52	PFR_JS13-1_51	Dolichyl-phosphate mannose synthase	61513	62259	+	PROKKA_00052	Undecaprenyl-phosphate mannosyltransferase	61513	62259	+	2.4.1.54		similar to AA sequence:UniProtKB:C5CBV8		0	0	0	0	0	0	0
53	PFR_JS13-1_52	Hypothetical protein	62256	62708	+	PROKKA_00053	hypothetical protein	62256	62708	+					0	0	0	0	0	0	0
54	PFR_JS13-1_53	Alpha-1,6-rhamnosyltransferase MigA	62769	63650	+	PROKKA_00054	GalNAc(5)-diNAcBac-PP-undecaprenol beta-1,3-glucosyltransferase	62769	63650	+	2.4.1.293	pglI	similar to AA sequence:UniProtKB:Q0P9C6		0	0	0	0	0	0	0
55	PFR_JS13-1_54	Rhamnosyltransferase , Glycosyl transferase	63661	65424	+	PROKKA_00055	Putative glycosyltransferase EpsE	63661	65424	+	2.4.-.-	epsE_1	similar to AA sequence:UniProtKB:P71054		0	1	1	0	0	0	0
56	PFR_JS13-1_55	Family 2 glycosyl transferase	65446	67368	+	PROKKA_00056	putative glycosyl transferase	65446	67368	+			protein motif:CLUSTERS:PRK10073		0	1	1	0	0	0	0
57	PFR_JS13-1_56	DTDP-rhamnosyl transferase RfbF	67451	68362	+	PROKKA_00057	Undecaprenyl-phosphate mannosyltransferase	67451	68362	+	2.4.1.54		similar to AA sequence:UniProtKB:C5CBV8		0	1	1	0	0	0	0
58	PFR_JS13-1_57	Polysaccharide biosynthesis protein	68448	69680	+	PROKKA_00058	hypothetical protein	68448	69680	+					0	1	1	0	0	0	0
59	PFR_JS13-1_58	Fused dTDP-4-keto-L-rhamnose reductase and	69748	71166	-	PROKKA_00059	putative dTDP-4-dehydrorhamnose 3,5-epimerase	69748	71166	-	5.1.3.13	rfbC	similar to AA sequence:UniProtKB:Q5XCG7		0	0	0	0	0	0	0
60	PFR_JS13-1_59	DTDP-glucose 4,6-dehydratase RmlB	71171	72169	-	PROKKA_00060	dTDP-glucose 4,6-dehydratase	71171	72169	-	4.2.1.46	rmlB	similar to AA sequence:UniProtKB:P95780		0	0	0	0	0	0	0
61	PFR_JS13-1_60	Large surface protein A	72300	76013	-	PROKKA_00061	Exo-glucosaminidase LytG precursor	72300	76013	-	3.2.1.-	lytG	similar to AA sequence:UniProtKB:O32083		0	0	0	0	0	0	0
62	PFR_JS13-1_61	UDP-galactopyranose mutase glf	76306	77493	+	PROKKA_00062	UDP-galactopyranose mutase	76306	77493	+	5.4.99.9	glf	similar to AA sequence:UniProtKB:O06934		1	0	0	0	0	0	0
63	PFR_JS13-1_62	Bifunctional UDP-galactofuranosyl transferase	77490	79526	+	PROKKA_00063	Galactofuranosyl transferase GlfT2	77490	79526	+	2.4.1.288	glfT2	similar to AA sequence:UniProtKB:O53585		0	0	0	0	0	0	0
64	PFR_JS13-1_63	Polysaccharide ABC superfamily ATP binding	79498	80415	+	PROKKA_00064	Teichoic acid translocation permease protein TagG	79498	80415	+		tagG	similar to AA sequence:UniProtKB:P42953		0	0	0	0	0	0	0
65	PFR_JS13-1_64	O-antigen export system ATP-binding protein RfbB	80415	81194	+	PROKKA_00065	Teichoic acids export ATP-binding protein TagH	80415	81194	+	3.6.3.40	tagH	similar to AA sequence:UniProtKB:P42954		1	0	0	0	0	0	0
66	PFR_JS13-1_65	Mobile element protein	81267	81971	-	PROKKA_00066	Transposase	81267	81971	-			protein motif:Pfam:PF01610.11		0	1	1	0	0	0	0
67	PFR_JS13-1_66	Transposase of ISAar43, IS3 family, IS407 group,	82067	82351	+	PROKKA_00067	Transposase	82067	82351	+			protein motif:Pfam:PF01527.14		0	1	1	0	0	0	0
68	PFR_JS13-1_67	Insertion sequence IS407 OrfB	82402	83217	+	PROKKA_00068	Integrase core domain protein	82402	83217	+			protein motif:Pfam:PF00665.20		0	1	1	0	0	0	0
69	PFR_JS13-1_68	ISL3 family transposase	83175	83825	-	PROKKA_00069	hypothetical protein	83175	83825	-					0	1	1	0	0	0	0
70	PFR_JS13-1_69	Conserved transmembrane protein	84064	85596	-	PROKKA_00070	hypothetical protein	84064	85596	-					0	1	1	0	0	0	0
71	PFR_JS13-1_70	Uma4 protein	86010	87317	-	PROKKA_00071	Transposase	86010	87317	-			protein motif:Pfam:PF01610.11		0	1	1	0	0	0	0
72	PFR_JS13-1_71	Hypothetical protein	87523	89838	-	PROKKA_00072	Putative glycosyltransferase EpsE	87523	89838	-	2.4.-.-	epsE_2	similar to AA sequence:UniProtKB:P71054		0	0	0	0	0	0	0
73	PFR_JS13-1_72	Amylovoran biosynthesis glycosyltransferase AmsE	89983	90840	-	PROKKA_00073	UDP-Gal:alpha-D-GlcNAc-diphosphoundecaprenol beta-1,3-galactosyltransferase	89983	90840	-	2.4.1.303	wbbD	similar to AA sequence:UniProtKB:Q03084		0	0	0	0	0	0	0
74	PFR_JS13-1_73	DTDP-rhamnosyl transferase RfbF	90837	91799	-	PROKKA_00074	Galactofuranosyl transferase GlfT1	90837	91799	-	2.4.1.287	glfT1	similar to AA sequence:UniProtKB:A0R5Z2		0	0	0	0	0	0	0
75	PFR_JS13-1_74	Thioredoxin	92023	92439	-	PROKKA_00075	Thioredoxin	92023	92439	-			protein motif:Pfam:PF00085.14		1	0	0	0	0	0	0
76	PFR_JS13-1_75	Integral membrane protein	92444	92953	-	PROKKA_00076	hypothetical protein	92444	92953	-					1	0	0	0	0	0	0
77	PFR_JS13-1_76	1-acyl-sn-glycerol-3-phosphate acyltransferase	94072	94869	-	PROKKA_00077	Bifunctional protein Aas	94072	94869	-		aas	similar to AA sequence:UniProtKB:P31119		1	0	0	0	0	0	0
78	PFR_JS13-1_77	Oxidoreductase, short chain	94869	95765	-	PROKKA_00078	3-oxoacyl-[acyl-carrier-protein] reductase FabG	94869	95765	-	1.1.1.100	fabG_1	similar to AA sequence:UniProtKB:Q9KQH7		1	0	0	0	0	0	0
79	PFR_JS13-1_78	Acetate kinase	95778	96968	-	PROKKA_00079	Acetate kinase	95778	96968	-	2.7.2.1	ackA	similar to AA sequence:UniProtKB:P77845		1	0	0	0	0	0	0
80	PFR_JS13-1_79	Phospho acetyltransferase	97140	98672	-	PROKKA_00080	Phosphate acetyltransferase	97140	98672	-	2.3.1.8	pta	similar to AA sequence:UniProtKB:Q8ZND6		1	0	0	0	0	0	0
81	PFR_JS13-1_80	DNA/RNA helicase, superfamily II, SNF2 family	98850	102248	-	PROKKA_00081	ATP-dependent helicase HepA	98850	102248	-			protein motif:CLUSTERS:PRK04914		1	0	0	0	0	0	0
82	PFR_JS13-1_81	Hypothetical protein	103009	104100	+	PROKKA_00082	hypothetical protein	103009	104100	+					0	0	0	0	0	0	0
83	PFR_JS13-1_82	Hypothetical protein	104051	104380	+	PROKKA_00083	Endo-1,4-beta-xylanase A precursor	104051	104380	+	3.2.1.8	xynA1	similar to AA sequence:UniProtKB:C6CRV0		0	0	0	0	0	0	0
84	PFR_JS13-1_83	Hypothetical protein	104483	105202	+	PROKKA_00084	hypothetical protein	104483	105202	+					1	0	0	0	0	0	0
85	PFR_JS13-1_84	Apurinic endonuclease	105434	106237	+	PROKKA_00085	putative endonuclease 4	105434	106237	+	3.1.21.2	end	similar to AA sequence:UniProtKB:P63535		1	0	0	0	0	0	0
86	PFR_JS13-1_85	AMP-dependent synthetase/ligase	106234	108192	+	PROKKA_00086	Long-chain-fatty-acid--CoA ligase FadD15	106234	108192	+	6.2.1.3		similar to AA sequence:UniProtKB:O53521		1	0	0	0	0	0	0
87	PFR_JS13-1_86	YdjK	108232	109848	-	PROKKA_00087	Major myo-inositol transporter IolT	108232	109848	-		iolT_2	similar to AA sequence:UniProtKB:O34718		1	0	0	0	0	0	0
88	PFR_JS13-1_87	Hydroxypyruvate isomerase	109973	110770	-	PROKKA_00088	Hydroxypyruvate isomerase	109973	110770	-	5.3.1.22	hyi	similar to AA sequence:UniProtKB:P30147		1	0	0	0	0	0	0
89	PFR_JS13-1_88	Transcriptional regulator, LacI family	111262	112284	+	PROKKA_00089	HTH-type transcriptional regulator AscG	111262	112284	+		ascG	similar to AA sequence:UniProtKB:P24242		1	0	0	0	0	0	0
90	PFR_JS13-1_89	Isochorismatase family protein yddQ	112475	113047	+	PROKKA_00090	Streptothricin hydrolase	112475	113047	+	3.5.2.19	sttH_1	similar to AA sequence:UniProtKB:Q1MW86	Putative antibiotic resistance	1	0	0	0	0	0	0
91	PFR_JS13-1_90	Serine/threonine-protein kinase PknD	113428	114288	+	PROKKA_00091	Cystine-binding periplasmic protein precursor	113428	114288	+		fliY	similar to AA sequence:UniProtKB:P0AEM9		1	0	0	0	0	0	0
92	PFR_JS13-1_91	ABC-type amino acid transport system, secreted	114582	115493	+	PROKKA_00092	Glutamine-binding periplasmic protein precursor	114582	115493	+		glnH_1	similar to AA sequence:UniProtKB:P0AEQ3		1	0	0	0	0	0	0
93	PFR_JS13-1_92	ABC-type amino acid transport system, secreted	115660	116571	+	PROKKA_00093	Glutamine-binding periplasmic protein precursor	115660	116571	+		glnH_2	similar to AA sequence:UniProtKB:P0AEQ3		1	0	0	0	0	0	0
94	PFR_JS13-1_93	Permease protein of ABC transporter system	116653	117633	+	PROKKA_00094	Inner membrane amino-acid ABC transporter permease protein YecS	116653	117633	+		yecS_1	similar to AA sequence:UniProtKB:P0AFT2		1	0	0	0	0	0	0
95	PFR_JS13-1_94	Amino acid ABC transporter ATP-binding protein,	117635	118462	+	PROKKA_00095	Glutamine transport ATP-binding protein GlnQ	117635	118462	+		glnQ_1	similar to AA sequence:UniProtKB:P27675		1	0	0	0	0	0	0
96	PFR_JS13-1_95	Hypothetical protein	119427	120308	+	PROKKA_00096	Transcriptional regulator YqjI	119427	120308	+		yqjI_1	similar to AA sequence:UniProtKB:P64588		0	0	0	0	0	0	0
97	PFR_JS13-1_96	Glutamine-dependent NAD( ) synthetase nadE	120566	122680	-	PROKKA_00097	Glutamine-dependent NAD(+) synthetase	120566	122680	-	6.3.5.1	nadE	similar to AA sequence:UniProtKB:P0A5L6		1	0	0	0	0	0	0
98	PFR_JS13-1_97	Bifunctional PLP-dependent enzyme with	122848	124053	+	PROKKA_00098	Cystathionine beta-lyase PatB	122848	124053	+	4.4.1.8	patB	similar to AA sequence:UniProtKB:Q08432		1	0	0	0	0	0	0
99	PFR_JS13-1_98	Ribose-5-phosphate isomerase B	124156	124602	+	PROKKA_00099	Ribose-5-phosphate isomerase B	124156	124602	+	5.3.1.6	rpiB_1	similar to AA sequence:UniProtKB:P37351		1	0	0	0	0	0	0
100	PFR_JS13-1_99	Deoxyribonucleoside regulator	124692	125717	-	PROKKA_00100	Deoxyribonucleoside regulator	124692	125717	-		deoR_1	similar to AA sequence:UniProtKB:P39140		0	0	0	0	0	0	0
101	PFR_JS13-1_100	Putative general substrate transporter	125899	127290	+	PROKKA_00101	D-galactonate transporter	125899	127290	+		dgoT	similar to AA sequence:UniProtKB:P0AA76		0	0	0	0	0	0	0
102	PFR_JS13-1_101	Type III effector Hrp-dependent outer protein	127330	128700	+	PROKKA_00102	hypothetical protein	127330	128700	+					0	0	0	0	0	0	0
103	PFR_JS13-1_102	4-hydroxythreonine-4-phosphate dehydrogenase	128693	129715	+	PROKKA_00103	4-hydroxythreonine-4-phosphate dehydrogenase 2	128693	129715	+	1.1.1.262	pdxA2	similar to AA sequence:UniProtKB:P58718		0	0	0	0	0	0	0
104	PFR_JS13-1_103	L-ribulose-5-phosphate 3-epimerase ulaE	129920	130837	+	PROKKA_00104	Xylose isomerase-like TIM barrel	129920	130837	+			protein motif:Pfam:PF01261.18		0	0	0	0	0	0	0
105	PFR_JS13-1_104	3-hydroxybutyryl-CoA dehydrogenase PaaC	130883	131851	+	PROKKA_00105	putative 3-hydroxybutyryl-CoA dehydrogenase	130883	131851	+	1.1.1.157	mmgB	similar to AA sequence:UniProtKB:P45856		0	0	0	0	0	0	0
106	PFR_JS13-1_105	Permease of the major facilitator	131901	133256	+	PROKKA_00106	Putative tartrate transporter	131901	133256	+		ttuB	similar to AA sequence:UniProtKB:Q44470		0	0	0	0	0	0	0
107	PFR_JS13-1_106	Putative insertion element ISCmi2 transposase	133237	133911	-	PROKKA_00107	IS2 transposase TnpB	133237	133911	-			protein motif:CLUSTERS:PRK09409		0	0	0	0	0	0	0
108	PFR_JS13-1_107	Transcriptional regulator, GntR family	134453	135202	-	PROKKA_00108	HTH-type transcriptional regulator LutR	134453	135202	-		lutR	similar to AA sequence:UniProtKB:O07007		0	0	0	0	0	0	0
109	PFR_JS13-1_108	Hypothetical protein	135382	135570	+	PROKKA_00109	hypothetical protein	135382	135570	+					0	0	0	0	0	0	0
110	PFR_JS13-1_109	DAK1 domain protein	135673	137391	+	PROKKA_00110	PTS-dependent dihydroxyacetone kinase, dihydroxyacetone-binding subunit DhaK	135673	137391	+	2.7.-.-	dhaK_1	similar to AA sequence:UniProtKB:Q9CIV8		0	0	0	0	0	0	0
111	PFR_JS13-1_110	Triosephosphate isomerase 2	137465	138217	+	PROKKA_00111	Triosephosphate isomerase	137465	138217	+	5.3.1.1	tpiA_1	similar to AA sequence:UniProtKB:Q5XD48		1	0	0	0	0	0	0
112	PFR_JS13-1_111	Transcriptional regulator	138379	139209	+	PROKKA_00112	Glycerol-3-phosphate regulon repressor	138379	139209	+		glpR	similar to AA sequence:UniProtKB:P0ACL0		1	0	0	0	0	0	0
113	PFR_JS13-1_112	Oxidoreductase, short chain	139363	140046	-	PROKKA_00113	putative oxidoreductase	139363	140046	-	1.-.-.-		similar to AA sequence:UniProtKB:Q99RF5		1	0	0	0	0	0	0
114	PFR_JS13-1_113	Putative ribose 5-phosphate isomerase	140888	141376	+	PROKKA_00114	Putative sugar phosphate isomerase YwlF	140888	141376	+	5.3.1.-	ywlF	similar to AA sequence:UniProtKB:P39156		1	0	0	0	0	0	0
115	PFR_JS13-1_114	Putative membrane protein	141855	142934	+	PROKKA_00115	hypothetical protein	141855	142934	+					1	0	0	0	0	0	0
116	PFR_JS13-1_115	HAD-superfamily hydrolase, subfamily IIA	142994	143866	+	PROKKA_00116	Arabinose operon protein AraL	142994	143866	+		araL	similar to AA sequence:UniProtKB:P94526		1	0	0	0	0	0	0
117	PFR_JS13-1_116	FGGY-family pentulose kinase	143898	145472	+	PROKKA_00117	Ribulokinase	143898	145472	+	2.7.1.16	araB_1	similar to AA sequence:UniProtKB:Q9KBQ3		1	0	0	0	0	0	0
118	PFR_JS13-1_117	Arabinose operon protein AraM	145485	146861	+	PROKKA_00118	Glycerol-1-phosphate dehydrogenase [NAD(P)+]	145485	146861	+	1.1.1.261	egsA	similar to AA sequence:UniProtKB:P94527		1	0	0	0	0	0	0
119	PFR_JS13-1_118	Ribulokinase	147099	148847	+	PROKKA_00119	Ribulokinase	147099	148847	+	2.7.1.16	araB_2	similar to AA sequence:UniProtKB:P94524		1	0	0	0	0	0	0
120	PFR_JS13-1_119	Transketolase	148966	151032	+	PROKKA_00120	Transketolase	148966	151032	+	2.2.1.1	tkt	similar to AA sequence:UniProtKB:O06811		1	0	0	0	0	0	0
121	PFR_JS13-1_120	CHY zinc finger	151313	151624	-	PROKKA_00121	CHY zinc finger	151313	151624	-			protein motif:Pfam:PF05495.6		0	0	0	0	0	0	0
122	PFR_JS13-1_121	Putative excinuclease ABC, A subunit	151801	154083	+	PROKKA_00122	UvrABC system protein A	151801	154083	+		uvrA_1	similar to AA sequence:UniProtKB:Q9WYV0		1	0	0	0	0	0	0
123	PFR_JS13-1_122	Aldose 1-epimerase family protein	154159	155055	-	PROKKA_00123	Putative glucose-6-phosphate 1-epimerase	154159	155055	-	5.1.3.15	yeaD	similar to AA sequence:UniProtKB:P39173		1	0	0	0	0	0	0
124	PFR_JS13-1_123	DNA polymerase beta domain protein region	155170	156003	+	PROKKA_00124	hypothetical protein	155170	156003	+					1	0	0	0	0	0	0
125	PFR_JS13-1_124	Hypothetical protein	155996	157081	+	PROKKA_00125	hypothetical protein	155996	157081	+					1	0	0	0	0	0	0
126	PFR_JS13-1_125	Hypothetical protein	157082	157939	-	PROKKA_00126	hypothetical protein	157082	157939	-					1	0	0	0	0	0	0
127	PFR_JS13-1_126	D-inositol-3-phosphate glycosyltransferase 2	158112	159341	+	PROKKA_00127	D-inositol 3-phosphate glycosyltransferase	158112	159341	+	2.4.1.250	mshA	similar to AA sequence:UniProtKB:A0QQZ8		1	0	0	0	0	0	0
128	PFR_JS13-1_127	1D-myo-inositol	159338	160156	+	PROKKA_00128	1D-myo-inositol 2-acetamido-2-deoxy-alpha-D-glucopyranoside deacetylase	159338	160156	+	3.5.1.103	mshB_1	similar to AA sequence:UniProtKB:Q9F344		1	0	0	0	0	0	0
129	PFR_JS13-1_128	Integral membrane protein	160327	160938	+	PROKKA_00129	acid-resistance membrane protein	160327	160938	+			protein motif:CLUSTERS:PRK10209		1	0	0	0	0	0	0
130	PFR_JS13-1_129	Ribose-phosphate diphosphokinase	161089	162069	-	PROKKA_00130	Ribose-phosphate pyrophosphokinase	161089	162069	-	2.7.6.1	prs_1	similar to AA sequence:UniProtKB:P65235		1	0	0	0	0	0	0
131	PFR_JS13-1_130	Glutamine amidotransferase class-I	162153	162842	-	PROKKA_00131	GMP synthase [glutamine-hydrolyzing]	162153	162842	-	6.3.5.2	guaA_1	similar to AA sequence:UniProtKB:P99105		1	0	0	0	0	0	0
132	PFR_JS13-1_131	Multidrug resistance protein	162868	164115	-	PROKKA_00132	4-hydroxybenzoate transporter PcaK	162868	164115	-		pcaK	similar to AA sequence:UniProtKB:Q51955		1	0	0	0	0	0	0
133	PFR_JS13-1_132	Transcriptional regulator, MerR	164153	164497	+	PROKKA_00133	HTH-type transcriptional regulator HmrR	164153	164497	+		hmrR	similar to AA sequence:UniProtKB:Q9X5X4		1	0	0	0	0	0	0
134	PFR_JS13-1_133	Hypothetical protein	164580	165134	+	PROKKA_00134	hypothetical protein	164580	165134	+					1	0	0	0	0	0	0
135	PFR_JS13-1_134	Hypothetical acetyltransferase YafP	165205	165750	-	PROKKA_00135	putative N-acetyltransferase YafP	165205	165750	-	2.3.1.-	yafP	similar to AA sequence:UniProtKB:Q47158		1	0	0	0	0	0	0
136	PFR_JS13-1_135	Transcriptional regulator	165882	166229	+	PROKKA_00136	HTH-type transcriptional regulator CmtR	165882	166229	+		cmtR	similar to AA sequence:UniProtKB:P67731		1	0	0	0	0	0	0
137	PFR_JS13-1_136	Metal cation transporting P-type ATPase ctpG	166226	168340	+	PROKKA_00137	Zinc-transporting ATPase	166226	168340	+	3.6.3.-	zosA_1	similar to AA sequence:UniProtKB:O31688		1	0	0	0	0	0	0
138	PFR_JS13-1_137	Hypothetical protein	168392	168883	+	PROKKA_00138	hypothetical protein	168392	168883	+					0	0	0	0	0	0	0
139	PFR_JS13-1_138	Hypothetical protein	169002	169607	+	PROKKA_00139	hypothetical protein	169002	169607	+					1	0	0	0	0	0	0
140	PFR_JS13-1_139	ABC-type Fe3-siderophores transport systems	169663	170472	+	PROKKA_00140	hypothetical protein	169663	170472	+					1	0	0	0	0	0	0
141	PFR_JS13-1_140	Hypothetical protein	170545	170769	-	PROKKA_00141	hypothetical protein	170545	170769	-					1	0	0	0	0	0	0
142	PFR_JS13-1_141	Transcriptional Regulator, TetR family	170915	171523	-	PROKKA_00142	HTH-type transcriptional repressor KstR2	170915	171523	-		kstR2_1	similar to AA sequence:UniProtKB:A0R4Z6		1	0	0	0	0	0	0
143	PFR_JS13-1_142	YghA protein	171703	172392	+	PROKKA_00143	hypothetical protein	171703	172392	+			protein motif:CLUSTERS:PRK10578		1	0	0	0	0	0	0
144	PFR_JS13-1_143	SAF domain protein	172936	173646	+	PROKKA_00144	hypothetical protein	172936	173646	+					1	0	0	0	0	0	0
145	PFR_JS13-1_144	Hypothetical protein	173646	174683	+	PROKKA_00145	hypothetical protein	173646	174683	+					1	0	0	0	0	0	0
146	PFR_JS13-1_145	Secretion system protein	174680	176455	+	PROKKA_00146	Putative conjugal transfer protein/MT3759	174680	176455	+			similar to AA sequence:UniProtKB:Q7D547		1	0	0	0	0	0	0
147	PFR_JS13-1_146	Type II secretion system protein (Precursor)	176452	177345	+	PROKKA_00147	Bacterial type II secretion system protein F domain protein	176452	177345	+			protein motif:Pfam:PF00482.17		1	0	0	0	0	0	0
148	PFR_JS13-1_147	Type II secretion system F domain protein	177338	178243	+	PROKKA_00148	hypothetical protein	177338	178243	+					1	0	0	0	0	0	0
149	PFR_JS13-1_148	Hypothetical protein	178328	178552	+	PROKKA_00149	hypothetical protein	178328	178552	+					1	0	0	0	0	0	0
150	PFR_JS13-1_149	Hypothetical protein	178527	178949	+	PROKKA_00150	TadE-like protein	178527	178949	+			protein motif:Pfam:PF07811.6		1	0	0	0	0	0	0
151	PFR_JS13-1_150	Hypothetical protein	179015	179572	+	PROKKA_00151	hypothetical protein	179015	179572	+					1	0	0	0	0	0	0
152						PROKKA_00152	tRNA-His(atg)	179777	179867	+			COORDINATES:profile:Aragorn:1.2		0					0	0
153	PFR_JS13-1_151	Hypothetical protein	179569	183279	+											0	0	0	0	0	0
154	PFR_JS13-1_152	Multiple antibiotic resistance (MarC)-related	183290	183880	-	PROKKA_00153	putative antibiotic transporter	183290	183880	-			protein motif:CLUSTERS:PRK10739	Putative antibiotic resistance	1	0	0	0	0	0	0
155	PFR_JS13-1_153	Transporter, major facilitator family protein	183880	185307	-	PROKKA_00154	2-acyl-glycerophospho-ethanolamine acyltransferase	183880	185307	-			protein motif:CLUSTERS:PRK08633		1	0	0	0	0	0	0
156	PFR_JS13-1_154	Conserved domain protein	185641	186606	-	PROKKA_00155	hypothetical protein	185641	186606	-					1	0	0	0	0	0	0
157	PFR_JS13-1_155	Response regulator receiver domain protein	186960	187622	-	PROKKA_00156	Transcriptional regulatory protein DegU	186960	187622	-		degU	similar to AA sequence:UniProtKB:P13800		1	0	0	0	0	0	0
158	PFR_JS13-1_156	Histidine kinase	187656	189065	-	PROKKA_00157	Sensor histidine kinase DesK	187656	189065	-	2.7.13.3	desK_2	similar to AA sequence:UniProtKB:O34757		1	0	0	0	0	0	0
159	PFR_JS13-1_157	Hypothetical protein	189439	191322	+	PROKKA_00158	hypothetical protein	189439	191322	+					0	0	0	0	0	0	0
160	PFR_JS13-1_158	Hypothetical protein	191409	191537	-	PROKKA_00159	hypothetical protein	191409	191537	-					1	0	0	0	0	0	0
161	PFR_JS13-1_159	Hypothetical protein	191765	191968	+	PROKKA_00160	hypothetical protein	191765	191968	+					0	0	0	0	0	0	0
162	PFR_JS13-1_160	Translation regulator	192040	193536	-	PROKKA_00161	Purine catabolism regulatory protein	192040	193536	-		pucR_1	similar to AA sequence:UniProtKB:O32138		1	0	0	0	0	0	0
163	PFR_JS13-1_161	4-aminobutyrate aminotransferase apoenzyme	193716	195050	+	PROKKA_00162	5-aminovalerate aminotransferase DavT	193716	195050	+	2.6.1.48	davT	similar to AA sequence:UniProtKB:Q9I6M4		1	0	0	0	0	0	0
164	PFR_JS13-1_162	McyI protein	195047	196126	+	PROKKA_00163	Glycerate dehydrogenase	195047	196126	+	1.1.1.29	hprA	similar to AA sequence:UniProtKB:Q59516		1	0	0	0	0	0	0
165	PFR_JS13-1_163	Threonine dehydrogenase and related Zn-dependent	196130	197176	+	PROKKA_00164	Formaldehyde dismutase	196130	197176	+	1.2.99.4	fdm	similar to AA sequence:UniProtKB:Q52078		0	0	0	0	0	0	0
166	PFR_JS13-1_164	Probable amino-acid ABC transporter permease	197293	197931	+	PROKKA_00165	Inner membrane amino-acid ABC transporter permease protein YecS	197293	197931	+		yecS_2	similar to AA sequence:UniProtKB:P0AFT2		1	0	0	0	0	0	0
167	PFR_JS13-1_165	Amino acid ABC transporter, permease protein	197928	198584	+	PROKKA_00166	L-cystine transport system permease protein TcyB	197928	198584	+		tcyB	similar to AA sequence:UniProtKB:P42200		1	0	0	0	0	0	0
168	PFR_JS13-1_166	Periplasmic component of amino acid ABC-type	198651	199511	+	PROKKA_00167	Lysine-arginine-ornithine-binding periplasmic protein precursor	198651	199511	+		argT	similar to AA sequence:UniProtKB:P02911		1	0	0	0	0	0	0
169	PFR_JS13-1_167	Glutamine ABC transporter, ATP-binding protein	199581	200384	+	PROKKA_00168	Glutamine transport ATP-binding protein GlnQ	199581	200384	+	3.6.3.-	glnQ_2	similar to AA sequence:UniProtKB:O34677		1	0	0	0	0	0	0
170	PFR_JS13-1_168	Translation initiation inhibitor involved in	200392	200775	+	PROKKA_00169	Putative reactive intermediate deaminase TdcF	200392	200775	+	3.5.4.-	tdcF	similar to AA sequence:UniProtKB:P0AGL2		1	0	0	0	0	0	0
171	PFR_JS13-1_169	D-amino acid dehydrogenase	200772	202025	+	PROKKA_00170	D-amino acid dehydrogenase small subunit	200772	202025	+	1.4.99.1	dadA	similar to AA sequence:UniProtKB:P0A6J5		1	0	0	0	0	0	0
172	PFR_JS13-1_170	Asp/Glu/Hydantoin racemase superfamily protein	202022	202798	+	PROKKA_00171	hypothetical protein	202022	202798	+			protein motif:CLUSTERS:PRK07475		1	0	0	0	0	0	0
173	PFR_JS13-1_171	Histidine triad protein	203178	203627	+	PROKKA_00172	HIT-like protein	203178	203627	+	3.-.-.-		similar to AA sequence:UniProtKB:P44956		1	0	0	0	0	0	0
174	PFR_JS13-1_172	Molybdenum cofactor synthesis domain protein	203631	204215	+	PROKKA_00173	Molybdenum cofactor biosynthesis protein B	203631	204215	+		moaB	similar to AA sequence:UniProtKB:P99137		0	0	0	0	0	0	0
175	PFR_JS13-1_173	Molybdenum cofactor biosynthesis protein	204270	204818	-	PROKKA_00174	Cyclic pyranopterin monophosphate synthase accessory protein 2	204270	204818	-		moaC2	similar to AA sequence:UniProtKB:P0A5K6		1	0	0	0	0	0	0
176	PFR_JS13-1_174	Molybdenum cofactor synthesis domain protein	204811	206337	-	PROKKA_00175	Molybdopterin molybdenumtransferase	204811	206337	-	2.10.1.1	moeA_1	similar to AA sequence:UniProtKB:P12281		0	0	0	0	0	0	0
177	PFR_JS13-1_175	Molybdenum cofactor biosynthesis protein moeB1	206334	207209	-	PROKKA_00176	putative adenylyltransferase/sulfurtransferase MoeZ	206334	207209	-		moeZ_1	similar to AA sequence:UniProtKB:Q7D5X9		1	0	0	0	0	0	0
178	PFR_JS13-1_176	Molybdopterin converting factor, subunit 2	207209	207628	-	PROKKA_00177	Molybdopterin synthase catalytic subunit 1	207209	207628	-	2.8.1.12	moaE1	similar to AA sequence:UniProtKB:O05795		1	0	0	0	0	0	0
179	PFR_JS13-1_177	ThiS family protein	207730	208845	-	PROKKA_00178	ThiS family protein	207730	208845	-			protein motif:Pfam:PF02597.14		1	0	0	0	0	0	0
180	PFR_JS13-1_178	Respiratory nitrate reductase, gamma subunit	208974	209693	-	PROKKA_00179	Nitrate reductase-like protein NarX	208974	209693	-	1.7.99.4	narX_1	similar to AA sequence:UniProtKB:P71994		0	0	0	0	0	0	0
181	PFR_JS13-1_179	Nitrate reductase molybdenum cofactor assembly	209699	210493	-	PROKKA_00180	Nitrate reductase-like protein NarX	209699	210493	-	1.7.99.4	narX_2	similar to AA sequence:UniProtKB:P71994		0	0	0	0	0	0	0
182	PFR_JS13-1_180	Nitrate reductase, beta subunit	210493	212004	-	PROKKA_00181	Respiratory nitrate reductase 2 beta chain	210493	212004	-	1.7.99.4	narY	similar to AA sequence:UniProtKB:P19318		1	0	0	0	0	0	0
183	PFR_JS13-1_181	Nitrate reductase, alpha subunit	212004	215819	-	PROKKA_00182	Nitrate reductase alpha subunit	212004	215819	-	1.7.99.4	narG	similar to AA sequence:UniProtKB:O06559		0	0	0	0	0	0	0
184	PFR_JS13-1_182	Transporter, major facilitator family protein	215853	217211	-	PROKKA_00183	Nitrate/nitrite transporter NarK	215853	217211	-		narK	similar to AA sequence:UniProtKB:P10903		0	0	0	0	0	0	0
185	PFR_JS13-1_183	Molybdenum cofactor biosynthesis protein A	217355	218530	-	PROKKA_00184	Cyclic pyranopterin monophosphate synthase	217355	218530	-	4.1.99.18	moaA	similar to AA sequence:UniProtKB:Q44118		0	0	0	0	0	0	0
186	PFR_JS13-1_184	MobA-like NTP transferase domain protein	218629	219303	+	PROKKA_00185	molybdopterin-guanine dinucleotide biosynthesis protein MobA	218629	219303	+			protein motif:CLUSTERS:PRK00317		0	0	0	0	0	0	0
187	PFR_JS13-1_185	Molybdenum cofactor synthesis domain protein	219676	220182	-	PROKKA_00186	Molybdopterin adenylyltransferase	219676	220182	-	2.7.7.75	mog	similar to AA sequence:UniProtKB:P44645		0	0	0	0	0	0	0
188	PFR_JS13-1_186	Molybdate ABC transporter, periplasmic	220402	221178	+	PROKKA_00187	Molybdate-binding periplasmic protein precursor	220402	221178	+		modA	similar to AA sequence:UniProtKB:P45323		0	0	0	0	0	0	0
189	PFR_JS13-1_187	Molybdate ABC transporter, permease protein	221175	223295	+	PROKKA_00188	Glutamine transport ATP-binding protein GlnQ	221175	223295	+		glnQ_3	similar to AA sequence:UniProtKB:P10346		1	0	0	0	0	0	0
190	PFR_JS13-1_188	Putative CoA-substrate-specific enzyme activase	223488	227864	+	PROKKA_00189	Activator of (R)-2-hydroxyglutaryl-CoA dehydratase	223488	227864	+		hgdC	similar to AA sequence:UniProtKB:P11568		1	0	0	0	0	0	0
191	PFR_JS13-1_189	L-aspartate oxidase (LASPO) (Quinolinate	228056	229630	-	PROKKA_00190	L-aspartate oxidase	228056	229630	-	1.4.3.16	nadB_1	similar to AA sequence:UniProtKB:P10902		0	0	0	0	0	0	0
192	PFR_JS13-1_190	Mebrane associated protein	229849	230592	+	PROKKA_00191	VIT family protein	229849	230592	+			protein motif:Pfam:PF01988.13		0	0	0	0	0	0	0
193	PFR_JS13-1_191	Phthiotriol/phenolphthiotriol dimycocerosates	230602	231273	+	PROKKA_00192	Demethylrebeccamycin-D-glucose O-methyltransferase	230602	231273	+	2.1.1.164	rebM	similar to AA sequence:UniProtKB:Q8KZ94		0	0	0	0	0	0	0
194	PFR_JS13-1_192	Hypothetical protein	231627	232397	+	PROKKA_00193	6-carboxyhexanoate--CoA ligase	231627	232397	+	6.2.1.14	bioW	similar to AA sequence:UniProtKB:P22822		0	0	0	0	0	0	0
195	PFR_JS13-1_193	Putative aminotransferase biotin synthesis	232394	233695	+	PROKKA_00194	8-amino-7-oxononanoate synthase	232394	233695	+	2.3.1.47	bioF	similar to AA sequence:UniProtKB:P22806		0	0	0	0	0	0	0
196	PFR_JS13-1_194	Adenosylmethionine-8-amino-7-oxononanoate	233679	235109	+	PROKKA_00195	Adenosylmethionine-8-amino-7-oxononanoate aminotransferase	233679	235109	+	2.6.1.62	bioA	similar to AA sequence:UniProtKB:P0A4X6		0	0	0	0	0	0	0
197	PFR_JS13-1_195	ATP-dependent dethiobiotin synthetase BioD	235159	235890	+	PROKKA_00196	ATP-dependent dethiobiotin synthetase BioD	235159	235890	+	6.3.3.3	bioD	similar to AA sequence:UniProtKB:P46397		0	0	0	0	0	0	0
198	PFR_JS13-1_196	Ribose-5-phosphate isomerase B	236040	236522	+	PROKKA_00197	Ribose-5-phosphate isomerase B	236040	236522	+	5.3.1.6	rpiB_2	similar to AA sequence:UniProtKB:P37351		0	0	0	0	0	0	0
199	PFR_JS13-1_197	Sulfate adenylyltransferase subunit 1	236717	238066	-	PROKKA_00198	Bifunctional enzyme CysN/CysC	236717	238066	-		cysNC	similar to AA sequence:UniProtKB:Q10600		1	0	0	0	0	0	0
200	PFR_JS13-1_198	Sulfate adenylyltransferase subunit 2	238069	239124	-	PROKKA_00199	Sulfate adenylyltransferase subunit 2	238069	239124	-	2.7.7.4	cysD	similar to AA sequence:UniProtKB:P65670		1	0	0	0	0	0	0
201	PFR_JS13-1_199	Phosphoadenosine phosphosulfate reductase	239151	239900	-	PROKKA_00200	Phosphoadenosine phosphosulfate reductase	239151	239900	-	1.8.4.8	cysH	similar to AA sequence:UniProtKB:P94498		1	0	0	0	0	0	0
202	PFR_JS13-1_200	Sulfite reductase	239897	241702	-	PROKKA_00201	Sulfite reductase [ferredoxin]	239897	241702	-	1.8.7.1	sir	similar to AA sequence:UniProtKB:P71753		1	0	0	0	0	0	0
203	PFR_JS13-1_201	SubI	242490	243596	+	PROKKA_00202	Sulfate-binding protein precursor	242490	243596	+		sbpA	similar to AA sequence:UniProtKB:P27366		1	0	0	0	0	0	0
204	PFR_JS13-1_202	Sulfate-transport membrane protein ABC	243593	244657	+	PROKKA_00203	Sulfate transport system permease protein CysT	243593	244657	+		cysT	similar to AA sequence:UniProtKB:P27367		1	0	0	0	0	0	0
205	PFR_JS13-1_203	CysW	244647	245456	+	PROKKA_00204	Sulfate transport system permease protein CysW	244647	245456	+		cysW	similar to AA sequence:UniProtKB:P27370		1	0	0	0	0	0	0
206	PFR_JS13-1_204	Sulfate-transport ATP-binding protein ABC	245453	246505	+	PROKKA_00205	Sulfate/thiosulfate import ATP-binding protein CysA	245453	246505	+	3.6.3.25	cysA	similar to AA sequence:UniProtKB:P0A4W2		1	0	0	0	0	0	0
207	PFR_JS13-1_205	Cobalt-zinc-cadmium efflux permease	246731	247771	-	PROKKA_00206	Cadmium, cobalt and zinc/H(+)-K(+) antiporter	246731	247771	-		czcD_1	similar to AA sequence:UniProtKB:O07084		0	0	0	0	0	0	0
208	PFR_JS13-1_206	Transcriptional regulator, ArsR family	248058	248456	+	PROKKA_00207	putative HTH-type transcriptional regulator/MT0088	248058	248456	+			similar to AA sequence:UniProtKB:O53626		0	0	0	0	0	0	0
209	PFR_JS13-1_207	ABC-transporter transmembrane component	248821	249651	-	PROKKA_00208	Daunorubicin/doxorubicin resistance ABC transporter permease protein DrrB	248821	249651	-		drrB	similar to AA sequence:UniProtKB:P32011		1	0	0	0	0	0	0
210	PFR_JS13-1_208	Daunorubicin resistance ABC transporter ATPase	249648	250718	-	PROKKA_00209	Daunorubicin/doxorubicin resistance ATP-binding protein DrrA	249648	250718	-	3.6.3.-	drrA_1	similar to AA sequence:UniProtKB:P32010		1	0	0	0	0	0	0
211	PFR_JS13-1_209	Transcription regulator	251251	252276	-	PROKKA_00210	MarR family protein	251251	252276	-			protein motif:Pfam:PF01047.16		1	0	0	0	0	0	0
212	PFR_JS13-1_210	NAD(P)( ) transhydrogenase (AB-specific), alpha	252635	254188	+	PROKKA_00211	NAD(P) transhydrogenase subunit alpha	252635	254188	+	1.6.1.2	pntA	similar to AA sequence:UniProtKB:P07001		1	0	0	0	0	0	0
213	PFR_JS13-1_211	NAD(P) transhydrogenase subunit beta	254195	255607	+	PROKKA_00212	NAD(P) transhydrogenase subunit beta	254195	255607	+	1.6.1.2	pntB	similar to AA sequence:UniProtKB:P0AB67		1	0	0	0	0	0	0
214	PFR_JS13-1_212	Hypothetical protein	255840	256199	-	PROKKA_00213	hypothetical protein	255840	256199	-					0	0	0	0	0	0	0
215	PFR_JS13-1_213	4-alpha-glucanotransferase malQ	256874	258829	-	PROKKA_00214	4-alpha-glucanotransferase	256874	258829	-	2.4.1.25	malQ_1	similar to AA sequence:UniProtKB:Q59266		1	0	0	0	0	0	0
216	PFR_JS13-1_214	Hypothetical protein	258900	259382	-	PROKKA_00215	Lactose-specific phosphotransferase enzyme IIA component	258900	259382	-	2.7.1.-	lacF	similar to AA sequence:UniProtKB:P0A0D6		1	0	0	0	0	0	0
217	PFR_JS13-1_215	Hypothetical protein	259440	259799	-	PROKKA_00216	hypothetical protein	259440	259799	-					0	0	0	0	0	0	0
218	PFR_JS13-1_216	Riboflavin biosynthesis protein RibD	260200	261420	+	PROKKA_00217	Riboflavin biosynthesis protein RibD	260200	261420	+		ribD_1	similar to AA sequence:UniProtKB:P25539		0	0	0	0	0	0	0
219	PFR_JS13-1_217	Riboflavin synthase, alpha subunit	261510	262172	+	PROKKA_00218	Riboflavin synthase	261510	262172	+	2.5.1.9	ribE	similar to AA sequence:UniProtKB:P16440		1	0	0	0	0	0	0
220	PFR_JS13-1_218	Riboflavin biosynthesis protein ribA2	262169	263560	+	PROKKA_00219	Riboflavin biosynthesis protein RibBA	262169	263560	+		ribBA	similar to AA sequence:UniProtKB:A5U2B7		1	0	0	0	0	0	0
221	PFR_JS13-1_219	6,7-dimethyl-8-ribityllumazine synthase RibH	263557	264024	+	PROKKA_00220	6,7-dimethyl-8-ribityllumazine synthase	263557	264024	+	2.5.1.78	ribH	similar to AA sequence:UniProtKB:P66034		1	0	0	0	0	0	0
222	PFR_JS13-1_220	YflS	264181	265392	-	PROKKA_00221	Putative malate transporter YflS	264181	265392	-		yflS	similar to AA sequence:UniProtKB:O34726		0	0	0	0	0	0	0
223	PFR_JS13-1_221	Hypothetical protein	266008	267108	-	PROKKA_00222	hypothetical protein	266008	267108	-					0	0	0	0	0	0	0
224	PFR_JS13-1_222	Putative type I restriction-modification system,	267243	270608	-	PROKKA_00223	type I restriction enzyme EcoKI subunit R	267243	270608	-			protein motif:CLUSTERS:PRK11448		0	0	0	0	0	0	0	PfrJS13IP
225	PFR_JS13-1_223	Putative restriction-modification system	270608	271762	-	PROKKA_00224	Type-1 restriction enzyme EcoKI specificity protein	270608	271762	-		hsdS	similar to AA sequence:UniProtKB:P05719		0	0	0	0	0	0	0	S.PfrJS13I
226	PFR_JS13-1_224	N-6 DNA methylase	271759	273261	-	PROKKA_00225	putative type I restriction enzymeP M protein	271759	273261	-	2.1.1.72		similar to AA sequence:UniProtKB:Q89Z59		0	0	0	0	0	0	0	M.PfrJS13I
227	PFR_JS13-1_225	Hypothetical protein	273317	273823	-	PROKKA_00226	hypothetical protein	273317	273823	-					0	0	0	0	0	0	0
228	PFR_JS13-1_226	PF12952 domain protein	274008	274646	-	PROKKA_00227	hypothetical protein	274008	274646	-					0	0	0	0	0	0	0
229	PFR_JS13-1_227	ABC-type anion transport system, duplicated	275409	277148	+	PROKKA_00228	Bicarbonate transport system permease protein CmpB	275409	277148	+		cmpB_1	similar to AA sequence:UniProtKB:Q55106		0	0	0	0	0	0	0
230	PFR_JS13-1_228	Putative ABC-type Taurine transport system,	277242	278573	+	PROKKA_00229	Bicarbonate transport ATP-binding protein CmpD	277242	278573	+	3.6.3.-	cmpD	similar to AA sequence:UniProtKB:Q55463		0	0	0	0	0	0	0
231	PFR_JS13-1_229	Hypothetical protein	278757	280121	+	PROKKA_00230	hypothetical protein	278757	280121	+					0	0	0	0	0	0	0
232	PFR_JS13-1_230	Hypothetical protein	280199	281383	+	PROKKA_00231	hypothetical protein	280199	281383	+					0	0	0	0	0	0	0
233	PFR_JS13-1_231	MoxR family protein	281380	282423	+	PROKKA_00232	ATPase family associated with various cellular activities (AAA)	281380	282423	+			protein motif:Pfam:PF07726.5		0	0	0	0	0	0	0
234	PFR_JS13-1_232	PF01882 family protein	282428	283489	+	PROKKA_00233	hypothetical protein	282428	283489	+					0	0	0	0	0	0	0
235	PFR_JS13-1_233	Hypothetical protein	283473	284093	+	PROKKA_00234	hypothetical protein	283473	284093	+					0	0	0	0	0	0	0
236	PFR_JS13-1_234	Von Willebrand factor type A domain protein	284084	285094	+	PROKKA_00235	von Willebrand factor type A domain protein	284084	285094	+			protein motif:Pfam:PF00092.22		0	0	0	0	0	0	0
237	PFR_JS13-1_235	Von Willebrand factor type A domain protein	285091	286098	+	PROKKA_00236	von Willebrand factor type A domain protein	285091	286098	+			protein motif:Pfam:PF00092.22		0	0	0	0	0	0	0
238	PFR_JS13-1_236	Hypothetical protein	286095	286958	+	PROKKA_00237	Tetratricopeptide repeat protein	286095	286958	+			protein motif:Pfam:PF07719.11		0	0	0	0	0	0	0
239	PFR_JS13-1_237	Hypothetical protein	286980	287816	-	PROKKA_00238	hypothetical protein	286980	287816	-					0	0	0	0	0	0	0
240	PFR_JS13-1_238	Hypothetical protein	288375	288620	+	PROKKA_00239	hypothetical protein	288375	288620	+					0	0	0	0	0	0	0
241	PFR_JS13-1_239	Divalent metal cation transporter MntH	288829	290244	-	PROKKA_00240	Divalent metal cation transporter MntH	288829	290244	-		mntH	similar to AA sequence:UniProtKB:Q93V04		1	0	0	0	0	0	0
242	PFR_JS13-1_240	Transcriptional repressor sirR	290469	291146	+	PROKKA_00241	Iron-dependent repressor IdeR	290469	291146	+		ideR	similar to AA sequence:UniProtKB:P0A672		1	0	0	0	0	0	0
243	PFR_JS13-1_241	Hypothetical protein	291251	291676	-	PROKKA_00242	hypothetical protein	291251	291676	-					0	0	0	0	0	0	0
244	PFR_JS13-1_242	Toxin secretion/phage lysis holin	291698	293377	-	PROKKA_00243	Sodium/glucose cotransporter	291698	293377	-		sglT	similar to AA sequence:UniProtKB:P96169		0	0	0	0	0	0	0
245	PFR_JS13-1_243	Phosphomethylpyrimidine synthase	293793	295697	+	PROKKA_00244	Phosphomethylpyrimidine synthase	293793	295697	+	4.1.99.17	thiC	similar to AA sequence:UniProtKB:P45740		1	0	0	0	0	0	0
246	PFR_JS13-1_244	PF06224 family protein	295804	296964	-	PROKKA_00245	hypothetical protein	295804	296964	-					1	0	0	0	0	0	0
247	PFR_JS13-1_245	Hypothetical protein	297225	297557	-	PROKKA_00246	Ribbon-helix-helix protein, copG family	297225	297557	-			protein motif:Pfam:PF01402.15		0	0	0	0	0	0	0
248	PFR_JS13-1_246	Hypothetical protein	298076	298645	+	PROKKA_00247	hypothetical protein	298076	298645	+					1	0	0	0	0	0	0
249	PFR_JS13-1_247	UbiE family methyltransferase	298728	299546	-	PROKKA_00248	Demethylmenaquinone methyltransferase	298728	299546	-	2.1.1.163	ubiE_1	similar to AA sequence:UniProtKB:P67062		1	0	0	0	0	0	0
250	PFR_JS13-1_248	Xenobiotic reductase A	299701	300813	+	PROKKA_00249	NADPH dehydrogenase	299701	300813	+	1.6.99.1	namA	similar to AA sequence:UniProtKB:P54550		1	0	0	0	0	0	0
251	PFR_JS13-1_249	Lincomycin resistance protein LmrB	300860	302263	-	PROKKA_00250	putative transport protein HsrA	300860	302263	-		hsrA_1	similar to AA sequence:UniProtKB:P31474		1	0	0	0	0	0	0
252	PFR_JS13-1_250	Hypothetical protein	302410	302940	+	PROKKA_00251	MarR family protein	302410	302940	+			protein motif:Pfam:PF12802.1	Putative antibiotic resistance	0	0	0	0	0	0	0
253	PFR_JS13-1_251	Replicative DNA helicase	303069	304409	-	PROKKA_00252	Replicative DNA helicase	303069	304409	-	3.6.4.12	dnaB	similar to AA sequence:UniProtKB:P71715		1	0	0	0	0	0	0
254	PFR_JS13-1_252	Hypothetical protein	304414	305175	+	PROKKA_00253	hypothetical protein	304414	305175	+					0	0	0	0	0	0	0
255	PFR_JS13-1_253	Regulated in copper repressor	305330	305743	+	PROKKA_00254	Copper-sensing transcriptional repressor CsoR	305330	305743	+		csoR	similar to AA sequence:UniProtKB:O32222		1	0	0	0	0	0	0
256	PFR_JS13-1_254	Heavy metal transport/detoxification protein	305878	306090	+	PROKKA_00255	Heavy-metal-associated domain protein	305878	306090	+			protein motif:Pfam:PF00403.20		1	0	0	0	0	0	0
257	PFR_JS13-1_255	Copper-transporting ATPase CopA	306200	308689	+	PROKKA_00256	Copper-exporting P-type ATPase A	306200	308689	+	3.6.3.54	copA_1	similar to AA sequence:UniProtKB:Q2FV64		1	0	0	0	0	0	0
258	PFR_JS13-1_256	Hypothetical protein	308906	309685	+	PROKKA_00257	hypothetical protein	308906	309685	+					1	0	0	0	0	0	0
259	PFR_JS13-1_257	Hypothetical protein	309801	310028	-	PROKKA_00258	hypothetical protein	309801	310028	-					1	0	0	0	0	0	0
260	PFR_JS13-1_258	Hypothetical protein	310144	310617	-	PROKKA_00259	hypothetical protein	310144	310617	-					1	0	0	0	0	0	0
261	PFR_JS13-1_259	Na( )/H( ) antiporter NhaA	310952	312175	-	PROKKA_00260	Na(+)/H(+) antiporter NhaA	310952	312175	-		nhaA	similar to AA sequence:UniProtKB:P13738		1	0	0	0	0	0	0
262	PFR_JS13-1_260	Conserved domain protein	312480	313229	-	PROKKA_00261	hypothetical protein	312480	313229	-			protein motif:CLUSTERS:PRK08317		1	0	0	0	0	0	0
263	PFR_JS13-1_261	Septum site determining protein	313354	314847	+	PROKKA_00262	hypothetical protein	313354	314847	+					1	0	0	0	0	0	0
264	PFR_JS13-1_262	Helicase/secretion neighborhood ATPase	314834	315985	+	PROKKA_00263	Putative conjugal transfer protein/MT3759	314834	315985	+			similar to AA sequence:UniProtKB:Q7D547		1	0	0	0	0	0	0
265	PFR_JS13-1_263	Type II secretion system protein (Precursor)	315982	316779	+	PROKKA_00264	hypothetical protein	315982	316779	+					1	0	0	0	0	0	0
266	PFR_JS13-1_264	Type II secretion system F domain protein	316776	317519	+	PROKKA_00265	Bacterial type II secretion system protein F domain protein	316776	317519	+			protein motif:Pfam:PF00482.17		1	0	0	0	0	0	0
267	PFR_JS13-1_265	Protein mcbG	317652	318257	-	PROKKA_00266	Secreted effector protein pipB2	317652	318257	-		pipB2	similar to AA sequence:UniProtKB:Q8ZMM8		1	0	0	0	0	0	0
268	PFR_JS13-1_266	Hypothetical protein	318416	318727	+	PROKKA_00267	hypothetical protein	318416	318727	+					1	0	0	0	0	0	0
269	PFR_JS13-1_267	Hypothetical protein	318858	319316	+	PROKKA_00268	hypothetical protein	318858	319316	+					1	0	0	0	0	0	0
270	PFR_JS13-1_268	Hypothetical protein	319478	319810	+	PROKKA_00269	hypothetical protein	319478	319810	+					1	0	0	0	0	0	0
271	PFR_JS13-1_269	Hypothetical protein	319950	320216	-	PROKKA_00270	hypothetical protein	319950	320216	-					1	0	0	0	0	0	0
272	PFR_JS13-1_270	Cytoplasmic chaperone TorD	320298	321194	+	PROKKA_00271	twin-argninine leader-binding protein DmsD	320298	321194	+			protein motif:CLUSTERS:PRK11621		1	0	0	0	0	0	0
273	PFR_JS13-1_271	4Fe-4S ferredoxin iron-sulfur binding domain	321410	322621	+	PROKKA_00272	hypothetical protein	321410	322621	+					1	0	0	0	0	0	0
274	PFR_JS13-1_272	Anaerobic dimethyl sulfoxide reductase, A	322683	325340	+	PROKKA_00273	Dimethyl sulfoxide reductase DmsA precursor	322683	325340	+	1.8.5.3	dmsA	similar to AA sequence:UniProtKB:P18775		0	0	0	0	0	0	0
275	PFR_JS13-1_273	Dimethylsulfoxide reductase, chain B	325354	325998	+	PROKKA_00274	Anaerobic dimethyl sulfoxide reductase chain B	325354	325998	+		dmsB	similar to AA sequence:UniProtKB:P18776		1	0	0	0	0	0	0
276	PFR_JS13-1_274	Anaerobic dimethyl sulfoxide reductase chain C	325998	327002	+	PROKKA_00275	Anaerobic dimethyl sulfoxide reductase chain C	325998	327002	+		dmsC	similar to AA sequence:UniProtKB:P18777		1	0	0	0	0	0	0
277	PFR_JS13-1_275	DEAD/DEAH box helicase	326999	329461	-	PROKKA_00276	putative ATP-dependent helicase Lhr	326999	329461	-			protein motif:CLUSTERS:PRK09751		0	0	0	0	0	0	0
278	PFR_JS13-1_276	RRNA or tRNA methyltransferase	329711	331228	+	PROKKA_00277	Ribosomal RNA small subunit methyltransferase C	329711	331228	+	2.1.1.172	rsmC_1	similar to AA sequence:UniProtKB:P39406		1	0	0	0	0	0	0
279	PFR_JS13-1_277	DNA topoisomerase	331636	334422	+	PROKKA_00278	DNA topoisomerase 1	331636	334422	+	5.99.1.2	topA	similar to AA sequence:UniProtKB:P0A620		1	0	0	0	0	0	0
280	PFR_JS13-1_278	Hypothetical protein	334466	335911	+	PROKKA_00279	hypothetical protein	334466	335911	+					1	0	0	0	0	0	0
281	PFR_JS13-1_279	DTMP kinase	335908	336546	+	PROKKA_00280	Thymidylate kinase	335908	336546	+	2.7.4.9	tmk	similar to AA sequence:UniProtKB:Q97R91		1	0	0	0	0	0	0
282	PFR_JS13-1_280	DNA polymerase III, delta' subunit	336804	338186	+	PROKKA_00281	DNA polymerase III subunit tau	336804	338186	+	2.7.7.7	dnaX_1	similar to AA sequence:UniProtKB:P06710		1	0	0	0	0	0	0
283	PFR_JS13-1_281	Hypothetical protein	338334	340013	+	PROKKA_00282	hypothetical protein	338334	340013	+					0	0	0	0	0	0	0
284	PFR_JS13-1_282	PSP1 domain protein	340143	341192	+	PROKKA_00283	hypothetical protein	340143	341192	+			protein motif:Pfam:PF04468.6	PSP1 C-terminal conserved region	1	0	0	0	0	0	0
285						PROKKA_00284	tRNA-Thr(cgt)	341265	341339	+			COORDINATES:profile:Aragorn:1.2		0					0	0
286	PFR_JS13-1_283	ABC transporter	341500	342342	-	PROKKA_00285	Lipoprotein-releasing system ATP-binding protein LolD	341500	342342	-	3.6.3.-	lolD	similar to AA sequence:UniProtKB:P75957		1	0	0	0	0	0	0
287	PFR_JS13-1_284	Integral membrane protein	342342	343856	-	PROKKA_00286	Macrolide export ATP-binding/permease protein MacB	342342	343856	-	3.6.3.-	macB_1	similar to AA sequence:UniProtKB:Q2EHL8		0	0	0	0	0	0	0
288	PFR_JS13-1_285	Amino acid permease	344121	345572	+	PROKKA_00287	D-serine/D-alanine/glycine transporter	344121	345572	+		cycA_2	similar to AA sequence:UniProtKB:P0AAE0		1	0	0	0	0	0	0
289	PFR_JS13-1_286	FAD dependent oxidoreductase	345748	347103	+	PROKKA_00288	Putrescine oxidase	345748	347103	+	1.4.3.10	puo	similar to AA sequence:UniProtKB:P40974		1	0	0	0	0	0	0
290	PFR_JS13-1_287	ISMsm3 transposase	347823	349241	-	PROKKA_00289	Transposase DDE domain protein	347823	349241	-			protein motif:Pfam:PF01609.15		0	0	0	0	0	0	0		INSERTION/DELETION
291	PFR_JS13-1_288	Transposase for insertion sequence element	349297	350595	-	PROKKA_00290	Transposase	349297	350595	-			protein motif:Pfam:PF01610.11		0	0	0	0	0	0	0		INSERTION/DELETION
292	PFR_JS13-1_289	Hypothetical protein	350835	351014	+	PROKKA_00291	hypothetical protein	350835	351014	+					0	1	0	1	0	0	0		INSERTION/DELETION
293	PFR_JS13-1_290	Transposase of ISAar20, ISL3 family	351549	352436	+	PROKKA_00292	Transposase	351549	352436	+			protein motif:Pfam:PF01610.11		0	1	0	1	0	0	0		INSERTION/DELETION
294	PFR_JS13-1_291	Hypothetical protein	352381	354249	-	PROKKA_00293	hypothetical protein	352381	354249	-					0	1	0	1	0	0	0		INSERTION/DELETION
295	PFR_JS13-1_292	Hypothetical protein	354254	354700	-	PROKKA_00294	hypothetical protein	354254	354700	-					0	1	0	1	0	0	0		INSERTION/DELETION
296	PFR_JS13-1_293	Hypothetical protein	355500	356786	+	PROKKA_00295	hypothetical protein	355500	356786	+					0	1	0	1	0	0	0		INSERTION/DELETION
297	PFR_JS13-1_294	Hypothetical protein	356779	358803	+	PROKKA_00296	hypothetical protein	356779	358803	+					0	1	0	1	0	0	0		INSERTION/DELETION
298	PFR_JS13-1_295	Helicase domain protein	358790	362422	+	PROKKA_00297	hypothetical protein	358790	362422	+			protein motif:Pfam:PF00271.25	Helicase conserved C-terminal domain	0	1	0	1	0	0	0		INSERTION/DELETION
299	PFR_JS13-1_296	Hypothetical protein	362483	363127	+	PROKKA_00298	hypothetical protein	362483	363127	+					0	1	0	1	0	0	0		INSERTION/DELETION
300	PFR_JS13-1_297	GIY-YIG catalytic domain protein	363233	364168	-	PROKKA_00299	hypothetical protein	363233	364168	-					0	1	0	1	0	0	0		INSERTION/DELETION
301	PFR_JS13-1_298	ISMsm3 transposase	364543	365961	-	PROKKA_00300	Transposase DDE domain protein	364543	365961	-			protein motif:Pfam:PF01609.15		0	1	0	1	0	0	0		INSERTION/DELETION
302	PFR_JS13-1_299	Transposase for insertion sequence element	366017	367315	-	PROKKA_00301	Transposase	366017	367315	-			protein motif:Pfam:PF01610.11		0	0	0	0	0	0	0
303	PFR_JS13-1_300	Nitrogen regulatory protein P-II glnB	367796	368134	-	PROKKA_00302	Nitrogen regulatory protein P-II	367796	368134	-		glnB	similar to AA sequence:UniProtKB:P64249		1	0	0	0	0	0	0
304	PFR_JS13-1_301	Ammonium-transport integral membrane protein Amt	368131	369492	-	PROKKA_00303	Ammonia channel precursor	368131	369492	-		amt	similar to AA sequence:UniProtKB:O66515		1	0	0	0	0	0	0
305	PFR_JS13-1_302	Hypothetical protein	369654	370718	-	PROKKA_00304	hypothetical protein	369654	370718	-					1	0	0	0	0	0	0
306	PFR_JS13-1_303	Magnesium transporter, CorA family	370915	371817	-	PROKKA_00305	CorA-like Mg2+ transporter protein	370915	371817	-			protein motif:Pfam:PF01544.12		1	0	0	0	0	0	0
307	PFR_JS13-1_304	Phosphoglycerate mutase family protein	371821	372363	-	PROKKA_00306	Histidine phosphatase superfamily (branch 1)	371821	372363	-			protein motif:Pfam:PF00300.1		1	0	0	0	0	0	0
308	PFR_JS13-1_305	Putative DNA modification methylase	372365	373609	-	PROKKA_00307	hypothetical protein	372365	373609	-					0	0	0	0	0	0	0
309	PFR_JS13-1_306	Inorganic diphosphatase	373767	374324	-	PROKKA_00308	Inorganic pyrophosphatase	373767	374324	-	3.6.1.1	ppa	similar to AA sequence:UniProtKB:O69540		1	0	0	0	0	0	0
310	PFR_JS13-1_307	D-alanyl-D-alanine carboxypeptidase, serine-type,	374386	375756	+	PROKKA_00309	D-alanyl-D-alanine carboxypeptidase precursor	374386	375756	+	3.4.16.4	dac	similar to AA sequence:UniProtKB:P39045		1	0	0	0	0	0	0
311	PFR_JS13-1_308	Coenzyme F420 biosynthesis-associated protein	375918	377009	+	PROKKA_00310	hypothetical protein	375918	377009	+					0	0	0	0	0	0	0
312	PFR_JS13-1_309	Cell cycle protein mesJ	377009	377998	+	PROKKA_00311	tRNA(Ile)-lysidine synthase	377009	377998	+	6.3.4.19	tilS	similar to AA sequence:UniProtKB:Q5L3T3		1	0	0	0	0	0	0
313	PFR_JS13-1_310	Hypoxanthine phosphoribosyltransferase	378164	378715	+	PROKKA_00312	Hypoxanthine-guanine phosphoribosyltransferase	378164	378715	+	2.4.2.8	hpt	similar to AA sequence:UniProtKB:P99085		1	0	0	0	0	0	0
314	PFR_JS13-1_311	PIF1 helicase	378787	381249	+	PROKKA_00313	ATP-dependent RecD-like DNA helicase	378787	381249	+	3.6.4.12	recD2	protein motif:HAMAP:MF_01488		0	0	0	0	0	0	0
315	PFR_JS13-1_312	GTP cyclohydrolase 1	381219	381977	+	PROKKA_00314	GTP cyclohydrolase 1	381219	381977	+	3.5.4.16	folE	similar to AA sequence:UniProtKB:P19465		1	0	0	0	0	0	0
316	PFR_JS13-1_313	Transcriptional regulator, GntR family	381988	382455	+	PROKKA_00315	HTH-type transcriptional repressor YtrA	381988	382455	+		ytrA_1	similar to AA sequence:UniProtKB:O34712		0	0	0	0	0	0	0
317	PFR_JS13-1_314	Dihydropteroate synthase 1 FolP1	382595	383428	+	PROKKA_00316	Dihydropteroate synthase 1	382595	383428	+	2.5.1.15	folP1	similar to AA sequence:UniProtKB:P0A578		1	0	0	0	0	0	0
318	PFR_JS13-1_315	Dihydroneopterin aldolase	383575	383949	+	PROKKA_00317	putative dihydroneopterin aldolase	383575	383949	+	4.1.2.25	folB	similar to AA sequence:UniProtKB:P0A580		1	0	0	0	0	0	0
319	PFR_JS13-1_316	2-amino-4-hydroxy-6-hydroxymethyldihydropteridine	383946	384491	+	PROKKA_00318	2-amino-4-hydroxy-6-hydroxymethyldihydropteridine pyrophosphokinase	383946	384491	+	2.7.6.3	folK	similar to AA sequence:UniProtKB:P26281		1	0	0	0	0	0	0
320	PFR_JS13-1_317	Hypothetical protein	385063	385419	+	PROKKA_00319	Nucleoid-associated protein Lsr2	385063	385419	+		lsr2	similar to AA sequence:UniProtKB:P65648		1	0	0	0	0	0	0
321	PFR_JS13-1_318	Negative regulator of genetic competence	386254	388830	+	PROKKA_00320	ATP-dependent Clp protease ATP-binding subunit ClpC1	386254	388830	+		clpC1	similar to AA sequence:UniProtKB:P0A522		1	0	0	0	0	0	0
322	PFR_JS13-1_319	Hypothetical protein	388981	389667	-	PROKKA_00321	hypothetical protein	388981	389667	-					1	0	0	0	0	0	0
323	PFR_JS13-1_320	3-dehydroquinate dehydratase 2	389664	390419	-	PROKKA_00322	3-dehydroquinate dehydratase	389664	390419	-	4.2.1.10	aroD	similar to AA sequence:UniProtKB:Q5KY94		1	0	0	0	0	0	0
324	PFR_JS13-1_321	Para-aminobenzoate synthase, subunit I	390565	391146	-	PROKKA_00323	hypothetical protein	390565	391146	-			protein motif:CLUSTERS:PRK06547		1	0	0	0	0	0	0
325	PFR_JS13-1_322	Cobalt transport protein CbiQ	391157	391984	-	PROKKA_00324	Putative HMP/thiamine permease protein YkoC	391157	391984	-		ykoC	similar to AA sequence:UniProtKB:O34572		1	0	0	0	0	0	0
326	PFR_JS13-1_323	ABC transporter	391981	393651	-	PROKKA_00325	Putative HMP/thiamine import ATP-binding protein YkoD	391981	393651	-	3.6.3.-	ykoD_1	similar to AA sequence:UniProtKB:O34362		0	0	0	0	0	0	0
327	PFR_JS13-1_324	HMP/thiamine permease protein ykoE	393677	394312	-	PROKKA_00326	Putative HMP/thiamine permease protein YkoE	393677	394312	-		ykoE	similar to AA sequence:UniProtKB:O34738		1	0	0	0	0	0	0
328	PFR_JS13-1_325	Adenine glycosylase	394544	395422	-	PROKKA_00327	A/G-specific adenine glycosylase	394544	395422	-	3.2.2.-	mutY	similar to AA sequence:UniProtKB:O53574		1	0	0	0	0	0	0
329	PFR_JS13-1_326	DNA integrity scanning protein DisA	395502	396572	-	PROKKA_00328	DNA integrity scanning protein DisA	395502	396572	-	2.7.7.85	disA	similar to AA sequence:UniProtKB:Q9X8L6		1	0	0	0	0	0	0
330	PFR_JS13-1_327	DNA repair protein radA	396610	398004	-	PROKKA_00329	hypothetical protein	396610	398004	-			similar to AA sequence:UniProtKB:A0R563	DNA repair protein RadA homolog	1	0	0	0	0	0	0
331	PFR_JS13-1_328	Hypothetical protein	398120	398758	-	PROKKA_00330	hypothetical protein	398120	398758	-					1	0	0	0	0	0	0
332	PFR_JS13-1_329	AP endonuclease, family 2	398977	399846	+	PROKKA_00331	fructoselysine 3-epimerase	398977	399846	+			protein motif:CLUSTERS:PRK09856		1	0	0	0	0	0	0
333	PFR_JS13-1_330	CAAX amino terminal protease family protein	399848	400726	+	PROKKA_00332	CAAX amino terminal protease self- immunity	399848	400726	+			protein motif:Pfam:PF02517.10		1	0	0	0	0	0	0
334	PFR_JS13-1_331	Hypothetical membrane protein, DUF1211 family	400871	401566	+	PROKKA_00333	hypothetical protein	400871	401566	+					1	0	0	0	0	0	0
335	PFR_JS13-1_332	Aspartate-semialdehyde dehydrogenase asd	401658	402692	+	PROKKA_00334	Aspartate-semialdehyde dehydrogenase	401658	402692	+	1.2.1.11	asd	similar to AA sequence:UniProtKB:P0C1D8		1	0	0	0	0	0	0
336	PFR_JS13-1_333	ProC protein	402696	403556	+	PROKKA_00335	Pyrroline-5-carboxylate reductase	402696	403556	+	1.5.1.2	proC	similar to AA sequence:UniProtKB:P0A9L8		0	0	0	0	0	0	0
337	PFR_JS13-1_334	Uroporphyrin-III C-methyltransferase hemD	404045	405661	+	PROKKA_00336	Uroporphyrinogen-III C-methyltransferase	404045	405661	+	2.1.1.107	nasF	similar to AA sequence:UniProtKB:P42437		1	0	0	0	0	0	0
338	PFR_JS13-1_335	Phosphoglycerate mutase family protein	405716	406375	+	PROKKA_00337	bifunctional RNase H/acid phosphatase	405716	406375	+			protein motif:CLUSTERS:PRK07238		1	0	0	0	0	0	0
339	PFR_JS13-1_336	Mycothione reductase	406491	408011	+	PROKKA_00338	Mycothione reductase	406491	408011	+	1.8.1.15	mtr	similar to AA sequence:UniProtKB:O07927		1	0	0	0	0	0	0
340	PFR_JS13-1_337	Glycosyl hydrolase family 3 protein	408022	409275	+	PROKKA_00339	Beta-hexosaminidase	408022	409275	+	3.2.1.52	nagZ	similar to AA sequence:UniProtKB:Q9KU37		1	0	0	0	0	0	0
341	PFR_JS13-1_338	Arsenical pump-driving ATPase	409296	411071	-	PROKKA_00340	Arsenical pump-driving ATPase	409296	411071	-	3.6.3.16	arsA	similar to AA sequence:UniProtKB:P08690		1	0	0	0	0	0	0
342	PFR_JS13-1_339	Putative arsenic resistance operon repressor	411068	411535	-	PROKKA_00341	Arsenical resistance operon trans-acting repressor ArsD	411068	411535	-		arsD	similar to AA sequence:UniProtKB:P46003		0	0	0	0	0	0	0
343	PFR_JS13-1_340	Toxin-antitoxin system, antitoxin component, ArsR	411632	412006	+	PROKKA_00342	Arsenical resistance operon repressor	411632	412006	+		arsR	similar to AA sequence:UniProtKB:P45949		1	0	0	0	0	0	0
344	PFR_JS13-1_341	Putative heavy metal reductase	412006	412458	+	PROKKA_00343	Arsenate-mycothiol transferase ArsC1	412006	412458	+	2.8.4.2	arsC1	similar to AA sequence:UniProtKB:P0DKS5		1	0	0	0	0	0	0
345	PFR_JS13-1_342	Phosphate ABC transport system ATP-binding	412439	413218	-	PROKKA_00344	Phosphate import ATP-binding protein PstB	412439	413218	-	3.6.3.27	pstB	similar to AA sequence:UniProtKB:B8GYG4		1	0	0	0	0	0	0
346	PFR_JS13-1_343	Phosphate ABC transporter, inner membrane subunit	413223	414383	-	PROKKA_00345	Phosphate transport system permease protein PstA	413223	414383	-		pstA	similar to AA sequence:UniProtKB:P07654		1	0	0	0	0	0	0
347	PFR_JS13-1_344	Phosphate ABC transporter, permease protein PstC	414380	415360	-	PROKKA_00346	Phosphate transport system permease protein PstC	414380	415360	-		pstC	similar to AA sequence:UniProtKB:P0AGH8		1	0	0	0	0	0	0
348	PFR_JS13-1_345	Phosphate-binding transport protein of ABC	415357	416451	-	PROKKA_00347	Phosphate-binding protein PstS 2 precursor	415357	416451	-		pstS2	similar to AA sequence:UniProtKB:O05870		1	0	0	0	0	0	0
349	PFR_JS13-1_346	Hydrolase, NUDIX family	416639	417529	-	PROKKA_00348	Diadenosine hexaphosphate hydrolase	416639	417529	-	3.6.1.61	ndx1	similar to AA sequence:UniProtKB:Q75UV1		1	0	0	0	0	0	0
350	PFR_JS13-1_347	Polyphosphate kinase	417526	419715	-	PROKKA_00349	Polyphosphate kinase	417526	419715	-	2.7.4.1	ppk	similar to AA sequence:UniProtKB:P0A7B1		1	0	0	0	0	0	0
351	PFR_JS13-1_348	Mycothiol acetyltransferase	419712	420650	-	PROKKA_00350	Mycothiol acetyltransferase	419712	420650	-	2.3.1.189	mshD_1	similar to AA sequence:UniProtKB:O53831		1	0	0	0	0	0	0
352	PFR_JS13-1_349	UDP-glucose 4-epimerase (UDP-galactose	420862	421890	+	PROKKA_00351	UDP-glucose 4-epimerase	420862	421890	+	5.1.3.2	galE_1	similar to AA sequence:UniProtKB:P09147		0	0	0	0	0	0	0
353	PFR_JS13-1_350	Carboxymuconolactone decarboxylase family	421922	422647	-	PROKKA_00352	Carboxymuconolactone decarboxylase family protein	421922	422647	-			protein motif:Pfam:PF02627.1		1	0	0	0	0	0	0
354	PFR_JS13-1_351	Putative oxidoreductase GLYR1 isoform 1	422826	423422	-	PROKKA_00353	2-(hydroxymethyl)glutarate dehydrogenase	422826	423422	-	1.1.1.291	Hgd	similar to AA sequence:UniProtKB:Q0QLF5		0	0	0	0	0	0	0
355	PFR_JS13-1_352	Hypothetical protein	423441	423668	-	PROKKA_00354	tartronate semialdehyde reductase	423441	423668	-			protein motif:CLUSTERS:PRK11559		0	0	0	0	0	0	0
356	PFR_JS13-1_353	Inositol 1-phosphate synthase	424051	425130	-	PROKKA_00355	Inositol-3-phosphate synthase	424051	425130	-	5.5.1.4	ino1	similar to AA sequence:UniProtKB:P71703		1	0	0	0	0	0	0
357	PFR_JS13-1_354	Hypothetical protein	425745	426263	+	PROKKA_00356	hypothetical protein	425745	426263	+					0	0	0	0	0	0	0
358	PFR_JS13-1_355	Transcriptional regulatory protein GlnR	426439	427098	-	PROKKA_00357	Transcriptional regulatory protein YycF	426439	427098	-		yycF	similar to AA sequence:UniProtKB:P37478		1	0	0	0	0	0	0
359	PFR_JS13-1_356	D-tyrosyl-tRNA(Tyr) deacylase 1	427263	427868	-	PROKKA_00358	D-tyrosyl-tRNA(Tyr) deacylase	427263	427868	-	3.1.-.-	dtd	similar to AA sequence:UniProtKB:O66742		1	0	0	0	0	0	0
360	PFR_JS13-1_357	UPF0678 fatty acid-binding protein-like protein	427979	428482	+	PROKKA_00359	hypothetical protein	427979	428482	+					1	0	0	0	0	0	0
361	PFR_JS13-1_358	Folate-binding protein YgfZ	428586	429635	+	PROKKA_00360	putative global regulator	428586	429635	+			protein motif:CLUSTERS:PRK09559		1	0	0	0	0	0	0
362	PFR_JS13-1_359	GTP-binding translation elongation factor typA	429714	431597	-	PROKKA_00361	GTP-binding protein TypA/BipA	429714	431597	-		typA	similar to AA sequence:UniProtKB:P32132		1	0	0	0	0	0	0
363	PFR_JS13-1_360	Surface-anchored fimbrial subunit	432927	435515	+	PROKKA_00362	hypothetical protein	432927	435515	+				Pilus 1	0	0	0	0	0	0	0
364	PFR_JS13-1_361	Type-2 fimbrial major subunit	435512	436651	+	PROKKA_00363	Fimbrial subunit type 1 precursor	435512	436651	+			similar to AA sequence:UniProtKB:P18477	Pilus 1	0	0	0	0	0	0	0
365	PFR_JS13-1_362	Hypothetical protein	436744	437016	+	PROKKA_00364	Fimbrial subunit type 1 precursor	436744	437016	+			similar to AA sequence:UniProtKB:P18477	Pilus 1	0	0	0	0	0	0	0
366	PFR_JS13-1_363	Transposase, ISlxx5	437786	438820	+	PROKKA_00365	Integrase core domain protein	437786	438820	+			protein motif:Pfam:PF00665.20		0	0	0	0	0	0	0
367	PFR_JS13-1_364	Hypothetical protein	439126	439428	+	PROKKA_00366	hypothetical protein	439126	439428	+				Pilus 1	0	0	0	0	0	0	0
368	PFR_JS13-1_365	Putative fimbrial associated sortase-like	439625	440551	+	PROKKA_00367	Sortase family protein	439625	440551	+			protein motif:Pfam:PF04203.7	Pilus 1	1	0	0	0	0	0	0
369	PFR_JS13-1_366	Uracil phosphoribosyltransferase	440494	441135	-	PROKKA_00368	Uracil phosphoribosyltransferase	440494	441135	-	2.4.2.9	upp	similar to AA sequence:UniProtKB:P70881		1	0	0	0	0	0	0
370	PFR_JS13-1_367	Putative tRNA adenosine deaminase-associated	441324	442052	+	PROKKA_00369	hypothetical protein	441324	442052	+					1	0	0	0	0	0	0
371	PFR_JS13-1_368	Cytidine and deoxycytidylate deaminase	442124	442555	+	PROKKA_00370	tRNA-specific adenosine deaminase	442124	442555	+	3.5.4.33	tadA	similar to AA sequence:UniProtKB:P68398		1	0	0	0	0	0	0
372						PROKKA_00371	tRNA-Ser(cga)	442613	442700	+			COORDINATES:profile:Aragorn:1.2		0					0	0
373	PFR_JS13-1_369	Hypothetical protein	443030	444637	+	PROKKA_00372	hypothetical protein	443030	444637	+					0	0	0	0	0	0	0
374	PFR_JS13-1_370	Na /H and K /H antiporter	444653	446233	+	PROKKA_00373	K(+)/H(+) antiporter NhaP	444653	446233	+		nhaP	similar to AA sequence:UniProtKB:Q0ZAH6		1	0	0	0	0	0	0
375	PFR_JS13-1_371	Hypothetical protein	446315	446914	-	PROKKA_00374	hypothetical protein	446315	446914	-					1	0	0	0	0	0	0
376	PFR_JS13-1_372	Ferrous iron transport protein A	447277	447636	+	PROKKA_00375	FeoA domain protein	447277	447636	+			protein motif:Pfam:PF04023.8		1	0	0	0	0	0	0
377	PFR_JS13-1_373	Ferrous iron transport protein B	447815	449779	+	PROKKA_00376	Ferrous iron transport protein B	447815	449779	+		feoB	similar to AA sequence:UniProtKB:P33650		1	0	0	0	0	0	0
378	PFR_JS13-1_374	NifU domain protein	449906	450553	+	PROKKA_00377	Fe/S biogenesis protein NfuA	449906	450553	+		nfuA	protein motif:HAMAP:MF_01637		1	0	0	0	0	0	0
379	PFR_JS13-1_375	Galactokinase	450728	451876	+	PROKKA_00378	Galactokinase	450728	451876	+	2.7.1.6	galK_1	similar to AA sequence:UniProtKB:P0A6T3		1	0	0	0	0	0	0
380	PFR_JS13-1_376	Hypothetical protein	452093	453865	-	PROKKA_00379	Serine/threonine-protein kinase PknB	452093	453865	-	2.7.11.1	pknB_1	similar to AA sequence:UniProtKB:A0QNG1		1	0	0	0	0	0	0
381	PFR_JS13-1_377	PASTA domain protein	453989	455731	-	PROKKA_00380	Serine/threonine-protein kinase PknB	453989	455731	-	2.7.11.1	pknB_2	similar to AA sequence:UniProtKB:A0QNG1		1	0	0	0	0	0	0
382	PFR_JS13-1_378	Penicillin binding protein transpeptidase domain	455823	457247	-	PROKKA_00381	Penicillin-binding protein A	455823	457247	-		pbpA	similar to AA sequence:UniProtKB:P71586		1	0	0	0	0	0	0
383	PFR_JS13-1_379	Cell cycle protein, FtsW/RodA/SpoVE family	457244	458632	-	PROKKA_00382	Lipid II flippase FtsW	457244	458632	-		ftsW_1	similar to AA sequence:UniProtKB:O07639		1	0	0	0	0	0	0
384	PFR_JS13-1_380	Putative SERINE/THREONINE PHOSPHATASE PPP	458629	460164	-	PROKKA_00383	PP2C-family Ser/Thr phosphatase	458629	460164	-	3.1.3.16	pstP	similar to AA sequence:UniProtKB:P71588		1	0	0	0	0	0	0
385	PFR_JS13-1_381	FHA domain protein	460167	460640	-	PROKKA_00384	FHA domain-containing protein FhaB	460167	460640	-		fhaB	similar to AA sequence:UniProtKB:P71589		1	0	0	0	0	0	0
386	PFR_JS13-1_382	FHA domain protein	460643	461362	-	PROKKA_00385	FHA domain-containing protein FhaA	460643	461362	-		fhaA	similar to AA sequence:UniProtKB:P71590		1	0	0	0	0	0	0
387	PFR_JS13-1_383	Thioredoxin	461533	461961	-	PROKKA_00386	Putative thioredoxin-2	461533	461961	-		trxC_1	similar to AA sequence:UniProtKB:Q9RD25		1	0	0	0	0	0	0
388	PFR_JS13-1_384	Glycoside hydrolase family 2 multidomain protein	462099	463835	-	PROKKA_00387	Beta-glucuronidase	462099	463835	-	3.2.1.31	uidA	similar to AA sequence:UniProtKB:P05804		1	0	0	0	0	0	0
389	PFR_JS13-1_385	Hypothetical protein	464226	464444	+	PROKKA_00388	hypothetical protein	464226	464444	+					0	0	0	0	0	0	0
390	PFR_JS13-1_386	Mannosyltransferase PIG-V domain protein	464454	465671	-	PROKKA_00389	Mannosyltransferase (PIG-V))	464454	465671	-			protein motif:Pfam:PF04188.7		1	0	0	0	0	0	0
391	PFR_JS13-1_387	Putative cation transporting P-type ATPase	465786	468293	-	PROKKA_00390	Silver exporting P-type ATPase	465786	468293	-	3.6.3.53	silP	similar to AA sequence:UniProtKB:Q9ZHC7		0	0	0	0	0	0	0
392	PFR_JS13-1_388	Phosphocarrier protein HPr	468407	468673	-	PROKKA_00391	Phosphocarrier protein HPr	468407	468673	-	2.7.11.-	ptsH	similar to AA sequence:UniProtKB:O50515		1	0	0	0	0	0	0
393	PFR_JS13-1_389	Phosphoenolpyruvate-protein phosphotransferase	468913	470658	+	PROKKA_00392	Phosphoenolpyruvate-protein phosphotransferase	468913	470658	+	2.7.3.9	ptsI	similar to AA sequence:UniProtKB:P08838		1	0	0	0	0	0	0
394	PFR_JS13-1_390	S4 domain protein	470762	471115	-	PROKKA_00393	Heat shock protein 15	470762	471115	-		hslR	similar to AA sequence:UniProtKB:P0ACG8		1	0	0	0	0	0	0
395	PFR_JS13-1_391	Hydrolase, NUDIX family	471171	471869	-	PROKKA_00394	putative NUDIX hydrolase	471171	471869	-			protein motif:CLUSTERS:PRK10707		1	0	0	0	0	0	0
396	PFR_JS13-1_392	Endonuclease III	471955	472695	-	PROKKA_00395	Ultraviolet N-glycosylase/AP lyase	471955	472695	-		pdg	similar to AA sequence:UniProtKB:P46303		1	0	0	0	0	0	0
397	PFR_JS13-1_393	Endoribonuclease L-PSP family protein	472721	473176	-	PROKKA_00396	Enamine/imine deaminase	472721	473176	-	3.5.4.-	yabJ	similar to AA sequence:UniProtKB:P37552		1	0	0	0	0	0	0
398	PFR_JS13-1_394	Hypothetical protein	473173	473364	-	PROKKA_00397	hypothetical protein	473173	473364	-					1	0	0	0	0	0	0
399	PFR_JS13-1_395	Transcription factor WhiB	473354	473737	-	PROKKA_00398	Transcriptional regulator WhiB4	473354	473737	-		whiB4	similar to AA sequence:UniProtKB:O69649		1	0	0	0	0	0	0
400	PFR_JS13-1_396	Transglycosylase	473933	476140	+	PROKKA_00399	Penicillin-binding protein 1A/1B	473933	476140	+		ponA	similar to AA sequence:UniProtKB:P39793		1	0	0	0	0	0	0
401	PFR_JS13-1_397	Putative metallophosphoesterase ykuE	476137	477108	+	PROKKA_00400	phosphodiesterase YaeI	476137	477108	+			protein motif:CLUSTERS:PRK11340		1	0	0	0	0	0	0
402						PROKKA_00401	tRNA-Pro(cgg)	477259	477333	+			COORDINATES:profile:Aragorn:1.2		0					0	0
403	PFR_JS13-1_398	Putative polysaccharide syntase	477449	478984	-	PROKKA_00402	Cellulose synthase catalytic subunit [UDP-forming]	477449	478984	-	2.4.1.12	bcsA	similar to AA sequence:UniProtKB:P37653		1	0	0	0	0	0	0
404	PFR_JS13-1_399	Hypothetical protein	478981	479160	-	PROKKA_00403	hypothetical protein	478981	479160	-					0	0	0	0	0	0	0
405	PFR_JS13-1_400	Multicopper oxidase	479547	481067	-	PROKKA_00404	Copper resistance protein A precursor	479547	481067	-		copA_2	similar to AA sequence:UniProtKB:P12374		1	0	0	0	0	0	0
406	PFR_JS13-1_401	O-6-methylguanine DNA methyltransferase	481275	481910	-	PROKKA_00405	Methylated-DNA--protein-cysteine methyltransferase	481275	481910	-	2.1.1.63	ogt_1	similar to AA sequence:UniProtKB:P0A696		0	0	0	0	0	0	0
407	PFR_JS13-1_402	Methylated-DNA--protein-cysteine	481907	482461	-	PROKKA_00406	Methylated-DNA--protein-cysteine methyltransferase	481907	482461	-	2.1.1.63	ogt_2	similar to AA sequence:UniProtKB:P0A696		1	0	0	0	0	0	0
408	PFR_JS13-1_403	Putative membrane protein	482739	483419	+	PROKKA_00407	hypothetical protein	482739	483419	+			protein motif:CLUSTERS:PRK11212		1	0	0	0	0	0	0
409	PFR_JS13-1_404	Purine nucleosidase	483543	484556	-	PROKKA_00408	Pyrimidine-specific ribonucleoside hydrolase RihA	483543	484556	-	3.2.-.-	rihA	similar to AA sequence:UniProtKB:P41409		1	0	0	0	0	0	0
410	PFR_JS13-1_405	Aldehyde dehydrogenase	484975	486471	+	PROKKA_00409	Putative aldehyde dehydrogenase AldA	484975	486471	+	1.2.1.3	aldA	similar to AA sequence:UniProtKB:Q7A825		1	0	0	0	0	0	0
411	PFR_JS13-1_406	Hypothetical protein	486666	486881	+	PROKKA_00410	hypothetical protein	486666	486881	+					1	0	0	0	0	0	0
412	PFR_JS13-1_407	Adenylosuccinate synthase	487078	488361	+	PROKKA_00411	Adenylosuccinate synthetase	487078	488361	+	6.3.4.4	purA	similar to AA sequence:UniProtKB:P65880		1	0	0	0	0	0	0
413	PFR_JS13-1_408	Amino acid transporter, APC family protein	488896	490551	+	PROKKA_00412	putative amino acid permease YhdG	488896	490551	+		yhdG_1	similar to AA sequence:UniProtKB:O07576		1	0	0	0	0	0	0
414	PFR_JS13-1_409	Glutamate-1-semialdehyde aminotransferase	490693	492060	+	PROKKA_00413	Glutamate-1-semialdehyde 2,1-aminomutase 2	490693	492060	+	5.4.3.8	hemL2	similar to AA sequence:UniProtKB:Q81LD0		1	0	0	0	0	0	0
415	PFR_JS13-1_410	ATP-dependent chaperone protein ClpB	492419	495019	+	PROKKA_00414	Chaperone protein ClpB	492419	495019	+		clpB	similar to AA sequence:UniProtKB:Q7WSY8		1	0	0	0	0	0	0
416	PFR_JS13-1_411	Oligopeptide transporter, OPT family	495140	497131	-	PROKKA_00415	OPT oligopeptide transporter protein	495140	497131	-			protein motif:Pfam:PF03169.9		1	0	0	0	0	0	0
417	PFR_JS13-1_412	Spermidine synthase	497346	498263	+	PROKKA_00416	spermidine synthase	497346	498263	+			protein motif:CLUSTERS:PRK04457		1	0	0	0	0	0	0
418	PFR_JS13-1_413	Sortase family protein, LPXTG-site	498467	499075	+	PROKKA_00417	Sortase family protein	498467	499075	+			protein motif:Pfam:PF04203.7		0	0	0	0	0	0	0
419	PFR_JS13-1_414	Orotate phosphoribosyltransferase	499155	499712	+	PROKKA_00418	Orotate phosphoribosyltransferase	499155	499712	+	2.4.2.10	pyrE	similar to AA sequence:UniProtKB:Q8NM11		1	0	0	0	0	0	0
420	PFR_JS13-1_415	LemA family protein	499982	500851	+	PROKKA_00419	LemA family protein	499982	500851	+			protein motif:Pfam:PF04011.6		1	0	0	0	0	0	0
421	PFR_JS13-1_416	SNARE associated protein	501059	501802	-	PROKKA_00420	Inner membrane protein YqjA	501059	501802	-		yqjA	similar to AA sequence:UniProtKB:P0AA63		1	0	0	0	0	0	0
422	PFR_JS13-1_417	TRNA/rRNA methyltransferase (SpoU)	501878	502570	+	PROKKA_00421	Putative TrmH family tRNA/rRNA methyltransferase	501878	502570	+	2.1.1.-		similar to AA sequence:UniProtKB:Q7A794		1	0	0	0	0	0	0
423	PFR_JS13-1_418	Hypothetical protein	502576	503202	+	PROKKA_00422	hypothetical protein	502576	503202	+					1	0	0	0	0	0	0
424	PFR_JS13-1_419	Fructose-bisphosphate aldolase, class II	503431	504453	+	PROKKA_00423	Fructose-bisphosphate aldolase	503431	504453	+	4.1.2.13	fba	similar to AA sequence:UniProtKB:Q9ZEM7		1	0	0	0	0	0	0
425	PFR_JS13-1_420	Hypothetical protein	504707	504982	+	PROKKA_00424	hypothetical protein	504707	504982	+					1	0	0	0	0	0	0
426	PFR_JS13-1_421	Hypothetical protein	504984	505112	-	PROKKA_00425	hypothetical protein	504984	505112	-					1	0	0	0	0	0	0
427	PFR_JS13-1_422	Possible alcohol dehydrogenase	505236	506384	-	PROKKA_00426	Alcohol dehydrogenase	505236	506384	-	1.1.1.1	adh_1	similar to AA sequence:UniProtKB:P42327		1	0	0	0	0	0	0
428	PFR_JS13-1_423	Hypothetical protein	506510	507802	-	PROKKA_00427	Sugar (and other) transporter	506510	507802	-			protein motif:Pfam:PF00083.18		1	0	0	0	0	0	0
429	PFR_JS13-1_424	MFS transporter, sugar porter family protein	507985	509583	-	PROKKA_00428	Major myo-inositol transporter IolT	507985	509583	-		iolT_3	similar to AA sequence:UniProtKB:O34718		1	0	0	0	0	0	0
430	PFR_JS13-1_425	Methylmalonic acid semialdehyde dehydrogenase	509953	511458	-	PROKKA_00429	Methylmalonate-semialdehyde dehydrogenase [acylating]	509953	511458	-	1.2.1.27	mmsA	similar to AA sequence:UniProtKB:P28810		1	0	0	0	0	0	0
431	PFR_JS13-1_426	Thiamine pyrophosphate enzyme, TPP binding domain	511724	513631	-	PROKKA_00430	3D-(3,5/4)-trihydroxycyclohexane-1,2-dione hydrolase	511724	513631	-	3.7.1.-	iolD	similar to AA sequence:UniProtKB:P42415		1	0	0	0	0	0	0
432	PFR_JS13-1_427	Myo-inositol catabolism IolB domain protein	513731	514603	-	PROKKA_00431	5-deoxy-glucuronate isomerase	513731	514603	-	5.3.1.-	iolB	similar to AA sequence:UniProtKB:P42413		1	0	0	0	0	0	0
433	PFR_JS13-1_428	Deoxyribose-phosphate aldolase superfamily	514600	515469	-	PROKKA_00432	hypothetical protein	514600	515469	-					1	0	0	0	0	0	0
434	PFR_JS13-1_429	Kinase, PfkB family	515472	516461	-	PROKKA_00433	5-dehydro-2-deoxygluconokinase	515472	516461	-	2.7.1.92	iolC_1	similar to AA sequence:UniProtKB:Q9KAG8		1	0	0	0	0	0	0
435	PFR_JS13-1_430	UbiC transcription regulator-associated	516735	517487	+	PROKKA_00434	HTH-type transcriptional repressor YvoA	516735	517487	+		yvoA	similar to AA sequence:UniProtKB:O34817		1	0	0	0	0	0	0
436	PFR_JS13-1_431	Transaldolase	517681	518757	+	PROKKA_00435	Transaldolase	517681	518757	+	2.2.1.2	tal_1	similar to AA sequence:UniProtKB:Q31C15		1	0	0	0	0	0	0
437	PFR_JS13-1_432	Inositol 2-dehydrogenase IdhA	519071	520060	+	PROKKA_00436	Inositol 2-dehydrogenase	519071	520060	+	1.1.1.18	idhA	similar to AA sequence:UniProtKB:O68965		1	0	0	0	0	0	0
438	PFR_JS13-1_433	Hypothetical protein	520204	520551	+	PROKKA_00437	hypothetical protein	520204	520551	+					1	0	0	0	0	0	0
439	PFR_JS13-1_434	Inosose dehydratase	520726	521649	+	PROKKA_00438	Inosose dehydratase	520726	521649	+	4.2.1.44	iolE_1	similar to AA sequence:UniProtKB:P42416		1	0	0	0	0	0	0
440	PFR_JS13-1_435	Lysine exporter protein (LYSE/YGGA) (Precursor)	521896	522504	+	PROKKA_00439	Arginine exporter protein ArgO	521896	522504	+		argO	similar to AA sequence:UniProtKB:P11667		1	0	0	0	0	0	0
441	PFR_JS13-1_436	Dihydroxy-acid dehydratase 1	522832	524673	-	PROKKA_00440	Dihydroxy-acid dehydratase	522832	524673	-	4.2.1.9	ilvD	similar to AA sequence:UniProtKB:P05791		1	0	0	0	0	0	0
442	PFR_JS13-1_437	Aspartate--ammonia ligase	524806	526716	-	PROKKA_00441	Putative asparagine synthetase [glutamine-hydrolyzing]	524806	526716	-	6.3.5.4	asnB	similar to AA sequence:UniProtKB:P64248		1	0	0	0	0	0	0
443	PFR_JS13-1_438	Glutamyl-tRNA reductase HemA	526925	528178	+	PROKKA_00442	Glutamyl-tRNA reductase	526925	528178	+	1.2.1.70	hemA	similar to AA sequence:UniProtKB:P16618		1	0	0	0	0	0	0
444	PFR_JS13-1_439	Porphobilinogen deaminase 1	528175	529107	+	PROKKA_00443	Porphobilinogen deaminase	528175	529107	+	2.5.1.61	hemC	similar to AA sequence:UniProtKB:P06983		1	0	0	0	0	0	0
445	PFR_JS13-1_440	Uroporphyrinogen decarboxylase	529104	531002	+	PROKKA_00444	Uroporphyrinogen decarboxylase	529104	531002	+	4.1.1.37	hemE	similar to AA sequence:UniProtKB:Q8NT75		1	0	0	0	0	0	0
446	PFR_JS13-1_441	Coenzyme PQQ synthesis protein	531004	532125	+	PROKKA_00445	pyrroloquinoline quinone biosynthesis protein PqqE	531004	532125	+			protein motif:CLUSTERS:PRK05301		1	0	0	0	0	0	0
447	PFR_JS13-1_442	Protoporphyrinogen oxidase	532129	533712	+	PROKKA_00446	Protoporphyrinogen oxidase	532129	533712	+	1.3.3.4	hemY	similar to AA sequence:UniProtKB:P32397		1	0	0	0	0	0	0
448	PFR_JS13-1_443	Ferrochelatase	533709	534767	+	PROKKA_00447	Ferrochelatase	533709	534767	+	4.99.1.1	hemH	similar to AA sequence:UniProtKB:P0A576		1	0	0	0	0	0	0
449	PFR_JS13-1_444	Porphobilinogen synthase	534890	535888	+	PROKKA_00448	Delta-aminolevulinic acid dehydratase	534890	535888	+	4.2.1.24	hemB	similar to AA sequence:UniProtKB:P64334		1	0	0	0	0	0	0
450	PFR_JS13-1_445	Drug resistance transporter, EmrB/QacA subfamily	535917	537377	-	PROKKA_00449	putative transport protein HsrA	535917	537377	-		hsrA_2	similar to AA sequence:UniProtKB:P31474		1	0	0	0	0	0	0
451	PFR_JS13-1_446	Transcriptional regulator	537429	538208	+	PROKKA_00450	Bacterial regulatory proteins, tetR family	537429	538208	+			protein motif:Pfam:PF00440.17		1	0	0	0	0	0	0
452	PFR_JS13-1_447	Glutamate-1-semialdehyde 2,1-aminomutase hemL	538266	539591	+	PROKKA_00451	Glutamate-1-semialdehyde 2,1-aminomutase	538266	539591	+	5.4.3.8	hemL	similar to AA sequence:UniProtKB:Q5SJS4		1	0	0	0	0	0	0
453	PFR_JS13-1_448	Pyruvate carboxylase subunit B	539860	541377	+	PROKKA_00452	Methylmalonyl-CoA carboxyltransferase 5S subunit	539860	541377	+	2.1.3.1		similar to AA sequence:UniProtKB:Q70AC7		1	0	0	0	0	0	0
454	PFR_JS13-1_449	Methylmalonyl-CoA carboxyltransferase 12S	541393	542967	+	PROKKA_00453	Methylmalonyl-CoA carboxyltransferase 12S subunit	541393	542967	+	2.1.3.1		similar to AA sequence:UniProtKB:Q8GBW6		1	0	0	0	0	0	0
455	PFR_JS13-1_450	Hypothetical protein	542983	543231	+	PROKKA_00454	Methylmalonyl-CoA carboxyltransferase 12S subunit	542983	543231	+	2.1.3.1		similar to AA sequence:UniProtKB:Q8GBW6		1	0	0	0	0	0	0
456	PFR_JS13-1_451	Methylmalonyl-CoA carboxyltransferase 1.3S	543248	543619	+	PROKKA_00455	Methylmalonyl-CoA carboxyltransferase 1.3S subunit	543248	543619	+	2.1.3.1		similar to AA sequence:UniProtKB:P02904		1	0	0	0	0	0	0
457	PFR_JS13-1_452	Oxidoreductase, short chain	543750	544469	-	PROKKA_00456	Serine 3-dehydrogenase	543750	544469	-	1.1.1.276	sdh	similar to AA sequence:UniProtKB:Q9KWN1		1	0	0	0	0	0	0
458	PFR_JS13-1_453	Putative transcription regulator TetR/AcrR	544584	545315	-	PROKKA_00457	Bacterial regulatory proteins, tetR family	544584	545315	-			protein motif:Pfam:PF00440.17		1	0	0	0	0	0	0
459	PFR_JS13-1_454	2,3-bisphosphoglycerate-dependent	545646	546395	+	PROKKA_00458	2,3-bisphosphoglycerate-dependent phosphoglycerate mutase	545646	546395	+	5.4.2.11	gpmA	similar to AA sequence:UniProtKB:P33158		1	0	0	0	0	0	0
460	PFR_JS13-1_455	Phosphate transport system regulatory protein	546581	547258	-	PROKKA_00459	hypothetical protein	546581	547258	-			similar to AA sequence:UniProtKB:P65720	Phosphate-specific transport system accessory protein PhoU homolog 2	1	0	0	0	0	0	0
461	PFR_JS13-1_456	ATPase/histidine kinase/DNA gyrase B/HSP90 domain	547553	548740	+	PROKKA_00460	Signal-transduction histidine kinase senX3	547553	548740	+	2.7.13.3	senX3	similar to AA sequence:UniProtKB:A0QR01		1	0	0	0	0	0	0
462	PFR_JS13-1_457	Response regulator receiver domain protein	548746	549423	+	PROKKA_00461	Sensory transduction protein regX3	548746	549423	+		regX3	similar to AA sequence:UniProtKB:Q11156		1	0	0	0	0	0	0
463	PFR_JS13-1_458	Transcriptional regulator, CarD family	549564	550049	+	PROKKA_00462	RNA polymerase-binding transcription factor CarD	549564	550049	+		carD	similar to AA sequence:UniProtKB:A0R561		1	0	0	0	0	0	0
464	PFR_JS13-1_459	2-C-methyl-D-erythritol 4-phosphate	550113	550877	+	PROKKA_00463	2-C-methyl-D-erythritol 4-phosphate cytidylyltransferase	550113	550877	+	2.7.7.60	ispD	similar to AA sequence:UniProtKB:P96864		1	0	0	0	0	0	0
465	PFR_JS13-1_460	2-C-methyl-D-erythritol 2,4-cyclodiphosphate	550874	551374	+	PROKKA_00464	2-C-methyl-D-erythritol 2,4-cyclodiphosphate synthase	550874	551374	+	4.6.1.12	ispF	similar to AA sequence:UniProtKB:P65183		1	0	0	0	0	0	0
466	PFR_JS13-1_461	Serine hydroxymethyltransferase (Precursor)	551579	553027	-	PROKKA_00465	Serine hydroxymethyltransferase	551579	553027	-	2.1.2.1	glyA	similar to AA sequence:UniProtKB:A0R2V7		1	0	0	0	0	0	0
467	PFR_JS13-1_462	L-asparaginase, type I	553247	554248	-	PROKKA_00466	L-asparaginase 1	553247	554248	-	3.5.1.1	ansA	similar to AA sequence:UniProtKB:P0A962		1	0	0	0	0	0	0
468	PFR_JS13-1_463	Amino acid permease	554259	555809	-	PROKKA_00467	GABA permease	554259	555809	-		gabP_1	similar to AA sequence:UniProtKB:P46349		1	0	0	0	0	0	0
469	PFR_JS13-1_464	Amino acid permease	556128	557351	-	PROKKA_00468	GABA permease	556128	557351	-		gabP_2	similar to AA sequence:UniProtKB:P46349		1	0	0	0	0	0	0
470	PFR_JS13-1_465	RNA methyltransferase, TrmH family, group 3	557842	558765	-	PROKKA_00469	Putative TrmH family tRNA/rRNA methyltransferase	557842	558765	-	2.1.1.-		similar to AA sequence:UniProtKB:Q7A794		1	0	0	0	0	0	0
471	PFR_JS13-1_466	Cysteinyl-tRNA synthetase CysS	558765	560168	-	PROKKA_00470	Cysteine--tRNA ligase	558765	560168	-	6.1.1.16	cysS	similar to AA sequence:UniProtKB:P21888		1	0	0	0	0	0	0
472	PFR_JS13-1_467	FCD domain protein	560295	561296	-	PROKKA_00471	Putative L-lactate dehydrogenase operon regulatory protein	560295	561296	-		lldR	similar to AA sequence:UniProtKB:P0ACL7		1	0	0	0	0	0	0
473	PFR_JS13-1_468	Transporter, lactate permease family protein	561800	563503	+	PROKKA_00472	Glycolate permease GlcA	561800	563503	+		glcA	similar to AA sequence:UniProtKB:Q46839		1	0	0	0	0	0	0
474	PFR_JS13-1_469	Putative oxididoreductase subunit	563544	564353	+	PROKKA_00473	Lactate utilization protein A	563544	564353	+		lutA	similar to AA sequence:UniProtKB:O07020		1	0	0	0	0	0	0
475	PFR_JS13-1_470	Iron-sulfur cluster-binding protein	564350	565888	+	PROKKA_00474	Lactate utilization protein B	564350	565888	+		lutB	similar to AA sequence:UniProtKB:O07021		1	0	0	0	0	0	0
476	PFR_JS13-1_471	Protein of hypothetical function DUF162	565894	566550	+	PROKKA_00475	Lactate utilization protein C	565894	566550	+		lutC	similar to AA sequence:UniProtKB:O32259		1	0	0	0	0	0	0
477	PFR_JS13-1_472	Hypothetical protein	566792	567193	+	PROKKA_00476	hypothetical protein	566792	567193	+					1	0	0	0	0	0	0
478	PFR_JS13-1_473	Lipopolysaccharide kinase, Kdo/WaaP family	567239	568621	-	PROKKA_00477	Lipopolysaccharide kinase (Kdo/WaaP) family protein	567239	568621	-			protein motif:Pfam:PF06293.8		1	0	0	0	0	0	0
479	PFR_JS13-1_474	Cystathionine gamma-synthase (Cgs)	568706	569893	-	PROKKA_00478	Cystathionine gamma-synthase	568706	569893	-	2.5.1.48	metB	similar to AA sequence:UniProtKB:P00935		1	0	0	0	0	0	0
480	PFR_JS13-1_475	ATP binding protein of ABC transporter for	570163	571272	-	PROKKA_00479	sn-glycerol-3-phosphate import ATP-binding protein UgpC	570163	571272	-	3.6.3.20	ugpC	similar to AA sequence:UniProtKB:P10907		1	0	0	0	0	0	0
481	PFR_JS13-1_476	L-serine dehydratase 1	571488	572879	-	PROKKA_00480	L-serine dehydratase 1	571488	572879	-	4.3.1.17	sdaA	similar to AA sequence:UniProtKB:P16095		1	0	0	0	0	0	0
482	PFR_JS13-1_477	Amidohydrolase	573055	574329	+	PROKKA_00481	putative hydrolase YxeP	573055	574329	+	3.-.-.-	yxeP_2	similar to AA sequence:UniProtKB:P54955		1	0	0	0	0	0	0
483	PFR_JS13-1_478	Hypothetical membrane protein (DedA family)	574400	575413	+	PROKKA_00482	SNARE associated Golgi protein	574400	575413	+			protein motif:Pfam:PF09335.5		1	0	0	0	0	0	0
484	PFR_JS13-1_479	Putative RNase III regulator YmdB	575438	575947	-	PROKKA_00483	O-acetyl-ADP-ribose deacetylase	575438	575947	-	3.5.1.-	ymdB_1	similar to AA sequence:UniProtKB:P0A8D6		1	0	0	0	0	0	0
485	PFR_JS13-1_480	Hypothetical protein	576032	576415	+	PROKKA_00484	hypothetical protein	576032	576415	+					1	0	0	0	0	0	0
486	PFR_JS13-1_481	Ktn nad-binding domain involved with k transport	576422	578563	+	PROKKA_00485	potassium transporter peripheral membrane component	576422	578563	+			protein motif:CLUSTERS:PRK09496		1	0	0	0	0	0	0
487	PFR_JS13-1_482	Conserved transmembrane transport protein MmpL13	578684	581014	-	PROKKA_00486	Membrane protein YdfJ	578684	581014	-		ydfJ_1	similar to AA sequence:UniProtKB:P96687		1	0	0	0	0	0	0
488						PROKKA_00487	tRNA-Thr(tgt)	581294	581369	-			COORDINATES:profile:Aragorn:1.2		0					0	0
489	PFR_JS13-1_483	Mannose-6-phosphate isomerase, class I	581503	582702	-	PROKKA_00488	Mannose-6-phosphate isomerase	581503	582702	-	5.3.1.8	manA	similar to AA sequence:UniProtKB:P00946		1	0	0	0	0	0	0
490	PFR_JS13-1_484	Hypothetical protein	582921	583202	+	PROKKA_00489	hypothetical protein	582921	583202	+					1	0	0	0	0	0	0
491	PFR_JS13-1_485	60 kDa chaperonin 1	583546	585168	+	PROKKA_00490	60 kDa chaperonin 1	583546	585168	+		groL1_1	similar to AA sequence:UniProtKB:A0QQU5		1	0	0	0	0	0	0
492	PFR_JS13-1_486	Hypothetical protein	587740	588735	-	PROKKA_00491	hypothetical protein	587740	588735	-					1	0	0	0	0	0	0
493	PFR_JS13-1_487	NUDIX hydrolase	591954	592514	+	PROKKA_00492	hypothetical protein	591954	592514	+			protein motif:CLUSTERS:PRK08999		1	0	0	0	0	0	0
494	PFR_JS13-1_488	Surface layer protein A (S-layer protein A)	593064	594743	+	PROKKA_00493	hypothetical protein	593064	594743	+			protein motif:Pfam:PF00395.14	S-layer homology domain	0	0	0	0	0	0	0
495	PFR_JS13-1_489	Surface layer protein A (S-layer protein A)	595392	596783	+	PROKKA_00494	Endoglucanase C precursor	595392	596783	+	3.2.1.4	cenC	similar to AA sequence:UniProtKB:P14090		1	0	0	0	0	0	0
496	PFR_JS13-1_490	DEAD/DEAH box helicase	596946	598625	-	PROKKA_00495	Type III restriction enzyme, res subunit	596946	598625	-			protein motif:Pfam:PF04851.9		0	0	0	0	0	0	0
497	PFR_JS13-1_491	Conserved protein, putative helicase of DeaD/DeaH	598698	601019	-	PROKKA_00496	hypothetical protein	598698	601019	-					0	0	0	0	0	0	0
498	PFR_JS13-1_492	Hypothetical protein	601016	602044	-	PROKKA_00497	hypothetical protein	601016	602044	-					0	0	0	0	0	0	0
499	PFR_JS13-1_493	Cold shock protein	602271	602657	+	PROKKA_00498	Cold shock-like protein	602271	602657	+		csp	similar to AA sequence:UniProtKB:O54310		1	0	0	0	0	0	0
500	PFR_JS13-1_494	PF11228 family protein	602661	603440	+	PROKKA_00499	hypothetical protein	602661	603440	+					1	0	0	0	0	0	0
501	PFR_JS13-1_495	Hypothetical protein	603518	603859	-	PROKKA_00500	hypothetical protein	603518	603859	-					1	0	0	0	0	0	0
502	PFR_JS13-1_496	Guanine/hypoxanthine permease PbuG	603905	605467	+	PROKKA_00501	Guanine/hypoxanthine permease PbuG	603905	605467	+		pbuG	similar to AA sequence:UniProtKB:O34987		1	0	0	0	0	0	0
503	PFR_JS13-1_497	Hypothetical protein	605583	605969	+	PROKKA_00502	hypothetical protein	605583	605969	+					1	0	0	0	0	0	0
504	PFR_JS13-1_498	Phosphoserine transaminase	606012	607133	-	PROKKA_00503	Phosphoserine aminotransferase	606012	607133	-	2.6.1.52	serC	similar to AA sequence:UniProtKB:P63514		1	0	0	0	0	0	0
505	PFR_JS13-1_499	Iron-dependent repressor and activator IdeR	607310	607987	+	PROKKA_00504	Diphtheria toxin repressor	607310	607987	+		dtxR	similar to AA sequence:UniProtKB:P0DJL7		1	0	0	0	0	0	0
506	PFR_JS13-1_500	Thioredoxin	608103	608438	+	PROKKA_00505	Putative thioredoxin-2	608103	608438	+		trxC_2	similar to AA sequence:UniProtKB:Q9RD25		1	0	0	0	0	0	0
507	PFR_JS13-1_501	Hypothetical protein	608710	608934	-	PROKKA_00506	hypothetical protein	608710	608934	-					1	0	0	0	0	0	0
508	PFR_JS13-1_502	Carboxylic ester hydrolase	609086	609895	+	PROKKA_00507	acetyl esterase	609086	609895	+			protein motif:CLUSTERS:PRK10162		0	0	0	0	0	0	0
509	PFR_JS13-1_503	Isochorismatase family protein	609892	610512	+	PROKKA_00508	nicotinamidase/pyrazinamidase	609892	610512	+			protein motif:CLUSTERS:PRK11609		1	0	0	0	0	0	0
510	PFR_JS13-1_504	Hypothetical protein	610654	610986	-	PROKKA_00509	hypothetical protein	610654	610986	-					1	0	0	0	0	0	0
511						PROKKA_00510	tRNA-Arg(cct)	611083	611158	-			COORDINATES:profile:Aragorn:1.2		0					0	0
512	PFR_JS13-1_505	UDP-glucose pyrophosphorylase 2	611561	612934	+	PROKKA_00511	UTP--glucose-1-phosphate uridylyltransferase	611561	612934	+			protein motif:Pfam:PF01704.12		1	0	0	0	0	0	0
513	PFR_JS13-1_506	Hypothetical protein	612927	613337	+	PROKKA_00512	hypothetical protein	612927	613337	+					1	0	0	0	0	0	0
514	PFR_JS13-1_507	Large conductance mechanosensitive channel	613391	613834	-	PROKKA_00513	Large-conductance mechanosensitive channel	613391	613834	-		mscL	similar to AA sequence:UniProtKB:A5U127		1	0	0	0	0	0	0
515	PFR_JS13-1_508	Hypothetical protein	613927	614475	-	PROKKA_00514	flagellar basal body P-ring biosynthesis protein FlgA	613927	614475	-			protein motif:CLUSTERS:PRK12617		1	0	0	0	0	0	0
516	PFR_JS13-1_509	Type I antifreeze protein	614668	615063	-	PROKKA_00515	Zinc ribbon domain protein	614668	615063	-			protein motif:Pfam:PF09723.4		0	0	0	0	0	0	0
517	PFR_JS13-1_510	Hypothetical protein	615220	615903	-	PROKKA_00516	5-formyltetrahydrofolate cyclo-ligase family protein	615220	615903	-			protein motif:CLUSTERS:PRK10333		1	0	0	0	0	0	0
518	PFR_JS13-1_511	Molybdopterin molybdenumtransferase	615922	617208	+	PROKKA_00517	Molybdopterin molybdenumtransferase	615922	617208	+	2.10.1.1	moeA_2	similar to AA sequence:UniProtKB:P99139		1	0	0	0	0	0	0
519	PFR_JS13-1_512	Acetytransferase	617212	617922	+	PROKKA_00518	Putative ribosomal N-acetyltransferase YdaF	617212	617922	+	2.3.1.-	ydaF	similar to AA sequence:UniProtKB:P96579		1	0	0	0	0	0	0
520	PFR_JS13-1_513	Hypothetical protein	617997	618800	+	PROKKA_00519	hypothetical protein	617997	618800	+					1	0	0	0	0	0	0
521						PROKKA_00520	tRNA-Ala(cgc)	618876	618951	+			COORDINATES:profile:Aragorn:1.2		0					0	0
522	PFR_JS13-1_514	Hypothetical protein	619053	619616	-	PROKKA_00521	hypothetical protein	619053	619616	-					0	0	0	0	0	0	0
523	PFR_JS13-1_515	Hypothetical protein	619767	620186	+	PROKKA_00522	hypothetical protein	619767	620186	+					0	0	0	0	0	0	0
524	PFR_JS13-1_516	Histidine kinase	620289	620954	+	PROKKA_00523	Oxygen sensor histidine kinase NreB	620289	620954	+	2.7.13.3	nreB	similar to AA sequence:UniProtKB:Q7WZY5		0	0	0	0	0	0	0
525	PFR_JS13-1_517	Two-component system response regulator	620951	621610	+	PROKKA_00524	Transcriptional regulatory protein LiaR	620951	621610	+		liaR_1	similar to AA sequence:UniProtKB:O32197		0	0	0	0	0	0	0
526	PFR_JS13-1_518	Hypothetical protein	621773	622507	+	PROKKA_00525	hypothetical protein	621773	622507	+					0	0	0	0	0	0	0
527	PFR_JS13-1_519	Hypothetical protein	622602	622811	+	PROKKA_00526	hypothetical protein	622602	622811	+					0	0	0	0	0	0	0
528	PFR_JS13-1_520	Secreted peptidase	622921	623511	+	PROKKA_00527	Glycyl-glycine endopeptidase LytM precursor	622921	623511	+	3.4.24.75	lytM	similar to AA sequence:UniProtKB:O33599		1	0	0	0	0	0	0
529	PFR_JS13-1_521	Lactoylglutathione lyase and lyase	623561	623929	-	PROKKA_00528	Glyoxalase-like domain protein	623561	623929	-			protein motif:Pfam:PF12681.1		0	0	0	0	0	0	0
530	PFR_JS13-1_522	Putative HTH-type transcriptional regulator MarR	624008	624427	+	PROKKA_00529	Transcriptional regulator HosA	624008	624427	+		hosA	similar to AA sequence:UniProtKB:P69782		1	0	0	0	0	0	0
531	PFR_JS13-1_523	Transcriptional regulator	624519	624815	+	PROKKA_00530	Transcriptional repressor SdpR	624519	624815	+		sdpR	similar to AA sequence:UniProtKB:O32242		1	0	0	0	0	0	0
532	PFR_JS13-1_524	Drug resistance transporter, EmrB/QacA subfamily	624855	626321	+	PROKKA_00531	Multidrug export protein EmrB	624855	626321	+		emrB_2	similar to AA sequence:UniProtKB:P0AEJ0	Putative antibiotic resistance	1	0	0	0	0	0	0
533	PFR_JS13-1_525	Proline/glycine betaine transporter	626460	627899	+	PROKKA_00532	Proline/betaine transporter	626460	627899	+		proP	similar to AA sequence:UniProtKB:P0C0L7		1	0	0	0	0	0	0
534	PFR_JS13-1_526	Regulatory protein TetR	627975	628568	-	PROKKA_00533	Bacterial regulatory proteins, tetR family	627975	628568	-			protein motif:Pfam:PF00440.17		1	0	0	0	0	0	0
535	PFR_JS13-1_527	Probable multidrug resistance transporter, MFS	628681	630168	+	PROKKA_00534	putative multidrug resistance protein EmrY	628681	630168	+		emrY	similar to AA sequence:UniProtKB:P52600	Putative antibiotic resistance	1	0	0	0	0	0	0
536	PFR_JS13-1_528	Glutamate dehydrogenase	630323	631687	+	PROKKA_00535	NADP-specific glutamate dehydrogenase	630323	631687	+	1.4.1.4	gdhA	similar to AA sequence:UniProtKB:P00370		1	0	0	0	0	0	0
537	PFR_JS13-1_529	Transcriptional regulatory protein PadR	631807	632280	-	PROKKA_00536	acetyltransferase	631807	632280	-			protein motif:CLUSTERS:PRK07757		1	0	0	0	0	0	0
538	PFR_JS13-1_530	CrcB-like protein	632340	632726	-	PROKKA_00537	Putative fluoride ion transporter CrcB	632340	632726	-		crcB_1	similar to AA sequence:UniProtKB:P37002		1	0	0	0	0	0	0
539	PFR_JS13-1_531	CrcB-like protein	632723	633139	-	PROKKA_00538	Putative fluoride ion transporter CrcB	632723	633139	-		crcB_2	similar to AA sequence:UniProtKB:P37002		1	0	0	0	0	0	0
540	PFR_JS13-1_532	UspA domain protein	633136	633669	-	PROKKA_00539	Universal stress protein family protein	633136	633669	-			protein motif:Pfam:PF00582.20		1	0	0	0	0	0	0
541	PFR_JS13-1_533	Galactokinase	633826	635022	-	PROKKA_00540	Galactokinase	633826	635022	-	2.7.1.6	galK_2	similar to AA sequence:UniProtKB:P0A6T3		1	0	0	0	0	0	0
542	PFR_JS13-1_534	Twin-arginine translocation pathway signal and	635286	635807	+	PROKKA_00541	hypothetical protein	635286	635807	+					1	0	0	0	0	0	0
543	PFR_JS13-1_535	Uracyl permease	635838	637391	-	PROKKA_00542	Putative pyrimidine permease RutG	635838	637391	-		rutG	similar to AA sequence:UniProtKB:P75892		1	0	0	0	0	0	0
544	PFR_JS13-1_536	Integral membrane protein with DUF218 domain	637513	638577	-	PROKKA_00543	hypothetical protein	637513	638577	-					1	0	0	0	0	0	0
545	PFR_JS13-1_537	Dolichyl-phosphate-mannose-protein	638627	640186	-	PROKKA_00544	putative dolichyl-phosphate-mannose--protein mannosyltransferase	638627	640186	-	2.4.1.109	pmt	similar to AA sequence:UniProtKB:O05586		1	0	0	0	0	0	0
546	PFR_JS13-1_538	Glycoside hydrolase family 95	640473	642860	+	PROKKA_00545	hypothetical protein	640473	642860	+					1	0	0	0	0	0	0
547	PFR_JS13-1_539	Ribosomal RNA small subunit methyltransferase I	642874	643824	+	PROKKA_00546	Ribosomal RNA small subunit methyltransferase I	642874	643824	+	2.1.1.198	rsmI	similar to AA sequence:UniProtKB:P0A640		1	0	0	0	0	0	0
548	PFR_JS13-1_540	Hydrolase, TatD family	643957	644985	+	PROKKA_00547	putative deoxyribonuclease YcfH	643957	644985	+	3.1.21.-	ycfH	similar to AA sequence:UniProtKB:P0AFQ7		1	0	0	0	0	0	0
549	PFR_JS13-1_541	Ribosomal RNA small subunit methyltransferase A	644982	645851	+	PROKKA_00548	Ribosomal RNA small subunit methyltransferase A	644982	645851	+	2.1.1.182	rsmA	similar to AA sequence:UniProtKB:P66662		1	0	0	0	0	0	0
550	PFR_JS13-1_542	4-diphosphocytidyl-2-C-methyl-D-erythritol kinase	645928	646905	+	PROKKA_00549	4-diphosphocytidyl-2-C-methyl-D-erythritol kinase	645928	646905	+	2.7.1.148	ispE	similar to AA sequence:UniProtKB:P65178		1	0	0	0	0	0	0
551	PFR_JS13-1_543	Transcriptional regulator, TetR family	646940	647701	-	PROKKA_00550	Biofilm operon icaADBC HTH-type negative transcriptional regulator IcaR	646940	647701	-		icaR	similar to AA sequence:UniProtKB:A6QKF4		1	0	0	0	0	0	0
552	PFR_JS13-1_544	Aspartate carbomyltransferase	647844	648890	-	PROKKA_00551	Aspartate carbamoyltransferase	647844	648890	-	2.1.3.2	pyrB	similar to AA sequence:UniProtKB:Q8ZB39		1	0	0	0	0	0	0
553						PROKKA_00552	tRNA-Gln(ttg)	649052	649131	+			COORDINATES:profile:Aragorn:1.2		0					0	0
554	PFR_JS13-1_545	Bifunctional protein GlmU	649317	650864	+	PROKKA_00553	Bifunctional protein GlmU	649317	650864	+		glmU	similar to AA sequence:UniProtKB:P96382		1	0	0	0	0	0	0
555	PFR_JS13-1_546	Ribose-phosphate diphosphokinase	650898	651893	+	PROKKA_00554	Ribose-phosphate pyrophosphokinase	650898	651893	+	2.7.6.1	prs_2	similar to AA sequence:UniProtKB:P65232		1	0	0	0	0	0	0
556	PFR_JS13-1_547	50S ribosomal protein L25	652271	652930	+	PROKKA_00555	50S ribosomal protein L25	652271	652930	+		rplY	similar to AA sequence:UniProtKB:Q92N68		1	0	0	0	0	0	0
557	PFR_JS13-1_548	Peptidyl-tRNA hydrolase (Precursor)	653138	653728	+	PROKKA_00556	Peptidyl-tRNA hydrolase	653138	653728	+	3.1.1.29	pth	similar to AA sequence:UniProtKB:A0R3D3		1	0	0	0	0	0	0
558	PFR_JS13-1_549	Hypothetical protein	653787	654152	+	PROKKA_00557	hypothetical protein	653787	654152	+					1	0	0	0	0	0	0
559	PFR_JS13-1_550	Transcription-repair coupling factor	654231	657926	+	PROKKA_00558	Transcription-repair-coupling factor	654231	657926	+	3.6.4.-	mfd	similar to AA sequence:UniProtKB:P64326		1	0	0	0	0	0	0
560	PFR_JS13-1_551	Hypothetical protein	658048	658581	+	PROKKA_00559	hypothetical protein	658048	658581	+					1	0	0	0	0	0	0
561	PFR_JS13-1_552	MazG family protein	658581	659252	+	PROKKA_00560	Nucleoside triphosphate pyrophosphohydrolase	658581	659252	+	3.6.1.8	mazG	similar to AA sequence:UniProtKB:P0AEY3		1	0	0	0	0	0	0
562	PFR_JS13-1_553	Phosphopyruvate hydratase	659366	660655	+	PROKKA_00561	Enolase	659366	660655	+	4.2.1.11	eno_1	similar to AA sequence:UniProtKB:A0R3B8		1	0	0	0	0	0	0
563						PROKKA_00562	tRNA-Pro(tgg)	661511	661593	-			COORDINATES:profile:Aragorn:1.2		0					0	0
564	PFR_JS13-1_554	Hypothetical protein	660933	661574	+											0	0	0	0	0	0
565	PFR_JS13-1_555	PF04417 family protein	661654	662169	+	PROKKA_00563	hypothetical protein	661654	662169	+					1	0	0	0	0	0	0
566						PROKKA_00564	Guanosine-5'-triphosphate,3'-diphosphate pyrophosphatase	662166	663122	+	3.6.1.40	gppA	similar to AA sequence:UniProtKB:P25552		1					0	0
567	PFR_JS13-1_556	Exopolyphosphatase	662166	663122	+											0	0	0	0	0	0
568						PROKKA_00565	tRNA-Leu(taa)	663232	663305	+			COORDINATES:profile:Aragorn:1.2		0					0	0
569	PFR_JS13-1_557	Transcriptional regulator	663419	664057	-	PROKKA_00566	Tetracycline repressor protein class A from transposon 1721	663419	664057	-		tetR_1	similar to AA sequence:UniProtKB:P03038	Putative antibiotic resistance	0	0	0	0	0	0	0
570	PFR_JS13-1_558	ABC transporter family protein	664054	664827	-	PROKKA_00567	Inner membrane transport permease YbhR	664054	664827	-		ybhR_1	similar to AA sequence:UniProtKB:P0AFP9		0	0	0	0	0	0	0
571	PFR_JS13-1_559	Nod factor export ATP-binding protein I	664811	665743	-	PROKKA_00568	Daunorubicin/doxorubicin resistance ATP-binding protein DrrA	664811	665743	-	3.6.3.-	drrA_2	similar to AA sequence:UniProtKB:P32010	Putative antibiotic resistance	0	0	0	0	0	0	0
572	PFR_JS13-1_560	Actinorhodin transporter	665891	667318	-	PROKKA_00569	putative transport protein HsrA	665891	667318	-		hsrA_3	similar to AA sequence:UniProtKB:P31474		1	0	0	0	0	0	0
573	PFR_JS13-1_561	Transcriptional regulator	667383	668021	+	PROKKA_00570	Bacterial regulatory proteins, tetR family	667383	668021	+			protein motif:Pfam:PF00440.17		1	0	0	0	0	0	0
574	PFR_JS13-1_562	Phosphopyruvate hydratase	668312	669583	+	PROKKA_00571	Enolase	668312	669583	+	4.2.1.11	eno_2	similar to AA sequence:UniProtKB:P64074		1	0	0	0	0	0	0
575	PFR_JS13-1_563	Cationic amino acid transporter	669641	671104	-	PROKKA_00572	putative amino acid permease YhdG	669641	671104	-		yhdG_2	similar to AA sequence:UniProtKB:O07576		1	0	0	0	0	0	0
576	PFR_JS13-1_564	YhfK	671322	672095	-	PROKKA_00573	putative sugar epimerase YhfK	671322	672095	-	4.-.-.-	yhfK	similar to AA sequence:UniProtKB:O07609		0	0	0	0	0	0	0
577	PFR_JS13-1_565	Methyltransferase type 11	672398	673147	+	PROKKA_00574	Methyltransferase domain protein	672398	673147	+			protein motif:Pfam:PF08241.6		1	0	0	0	0	0	0
578	PFR_JS13-1_566	Putative CONSERVED TRANSMEMBRANE PROTEIN	673329	674141	+	PROKKA_00575	Bax inhibitor 1 like protein	673329	674141	+			protein motif:Pfam:PF12811.1		1	0	0	0	0	0	0
579	PFR_JS13-1_567	Hydrolase, NUDIX family	674315	675019	-	PROKKA_00576	Nucleoside triphosphatase NudI	674315	675019	-	3.6.1.-	nudI	similar to AA sequence:UniProtKB:P52006		1	0	0	0	0	0	0
580	PFR_JS13-1_568	Hypothetical protein	675068	676018	-	PROKKA_00577	hypothetical protein	675068	676018	-					1	0	0	0	0	0	0
581	PFR_JS13-1_569	Putative 3-methyladenine DNA glycosylase	676227	676877	+	PROKKA_00578	3-methyladenine DNA glycosylase	676227	676877	+			protein motif:CLUSTERS:PRK00802		1	0	0	0	0	0	0
582	PFR_JS13-1_570	Hypothetical protein	676905	676994	+	PROKKA_00579	hypothetical protein	676905	676994	+					0	0	0	0	0	0	0
583	PFR_JS13-1_571	Hypothetical protein	677007	677411	+	PROKKA_00580	hypothetical protein	677007	677411	+			protein motif:Pfam:PF08327.5	Activator of Hsp90 ATPase homolog 1-like protein	1	0	0	0	0	0	0
584	PFR_JS13-1_572	Hypothetical protein	677545	678000	+	PROKKA_00581	hypothetical protein	677545	678000	+					1	0	0	0	0	0	0
585	PFR_JS13-1_573	PF04978 family protein	678026	678532	-	PROKKA_00582	DinB superfamily protein	678026	678532	-			protein motif:Pfam:PF12867.1		1	0	0	0	0	0	0
586	PFR_JS13-1_574	HAD-superfamily hydrolase, subfamily IA,	678529	679143	-	PROKKA_00583	?-D-glucose-1-phosphatase	678529	679143	-			protein motif:CLUSTERS:PRK09456		1	0	0	0	0	0	0
587	PFR_JS13-1_575	FMN-binding split barrel	679321	679968	+	PROKKA_00584	Pyridoxamine 5'-phosphate oxidase	679321	679968	+			protein motif:Pfam:PF12900.1		1	0	0	0	0	0	0
588	PFR_JS13-1_576	Hypothetical protein	680073	680603	-	PROKKA_00585	hypothetical protein	680073	680603	-					1	0	0	0	0	0	0
589	PFR_JS13-1_577	Peptide methionine sulfoxide reductase MsrA	680723	681358	-	PROKKA_00586	Peptide methionine sulfoxide reductase MsrA	680723	681358	-	1.8.4.11	msrA	similar to AA sequence:UniProtKB:Q93S39		1	0	0	0	0	0	0
590	PFR_JS13-1_578	Uracil-DNA glycosylase 2	681470	682159	-	PROKKA_00587	Uracil-DNA glycosylase	681470	682159	-	3.2.2.27	ung	similar to AA sequence:UniProtKB:P67071		1	0	0	0	0	0	0
591	PFR_JS13-1_579	PF01594 domain protein	682340	683770	+	PROKKA_00588	pheromone autoinducer 2 transporter	682340	683770	+			protein motif:CLUSTERS:PRK12287		1	0	0	0	0	0	0
592	PFR_JS13-1_580	Hypothetical protein	683856	684818	+	PROKKA_00589	hypothetical protein	683856	684818	+					1	0	0	0	0	0	0
593	PFR_JS13-1_581	DoxX protein	684934	685368	-	PROKKA_00590	DoxX	684934	685368	-			protein motif:Pfam:PF07681.6		1	0	0	0	0	0	0
594	PFR_JS13-1_582	Transcription elongation factor GreA	685455	685958	-	PROKKA_00591	Transcription elongation factor GreA	685455	685958	-		greA	similar to AA sequence:UniProtKB:P64279		1	0	0	0	0	0	0
595	PFR_JS13-1_583	Mycothiol conjugate amidase Mca	686053	686979	+	PROKKA_00592	Mycothiol S-conjugate amidase	686053	686979	+	3.5.1.115	mca	similar to AA sequence:UniProtKB:A0R2W9		1	0	0	0	0	0	0
596	PFR_JS13-1_584	Conserved protein containing thioredoxin domain	687152	689836	+	PROKKA_00593	ASCH domain protein	687152	689836	+			protein motif:Pfam:PF04266.8		1	0	0	0	0	0	0
597	PFR_JS13-1_585	ASCH domain protein	689874	690392	+	PROKKA_00594	ASCH domain protein	689874	690392	+			protein motif:Pfam:PF04266.8		1	0	0	0	0	0	0
598	PFR_JS13-1_586	Isoprenyl transferase 2	690405	691214	-	PROKKA_00595	(2Z,6E)-farnesyl diphosphate synthase	690405	691214	-	2.5.1.68		similar to AA sequence:UniProtKB:Q47SS3		1	0	0	0	0	0	0
599	PFR_JS13-1_587	Channel protein, hemolysin III family protein	691413	692150	+	PROKKA_00596	Haemolysin-III related	691413	692150	+			protein motif:Pfam:PF03006.14		1	0	0	0	0	0	0
600	PFR_JS13-1_588	Exodeoxyribonuclease 7 small subunit	692195	692437	-	PROKKA_00597	Exodeoxyribonuclease 7 small subunit	692195	692437	-	3.1.11.6	xseB	similar to AA sequence:UniProtKB:Q7VV85		1	0	0	0	0	0	0
601	PFR_JS13-1_589	Exodeoxyribonuclease VII, large subunit	692484	693635	-	PROKKA_00598	Exodeoxyribonuclease 7 large subunit	692484	693635	-	3.1.11.6	xseA	similar to AA sequence:UniProtKB:P04994		1	0	0	0	0	0	0
602	PFR_JS13-1_590	4-hydroxy-3-methylbut-2-enyl diphosphate	693652	694890	+	PROKKA_00599	4-hydroxy-3-methylbut-2-enyl diphosphate reductase	693652	694890	+	1.17.1.2	ispH	similar to AA sequence:UniProtKB:P62623		1	0	0	0	0	0	0
603	PFR_JS13-1_591	RmuC family DNA recombination protein	694822	696171	-	PROKKA_00600	DNA recombination protein RmuC	694822	696171	-		rmuC	similar to AA sequence:UniProtKB:P0AG71		1	0	0	0	0	0	0
604	PFR_JS13-1_592	M18 family aminopeptidase	696320	697591	+	PROKKA_00601	putative M18 family aminopeptidase 2	696320	697591	+	3.4.11.-	apeB	similar to AA sequence:UniProtKB:Q9HYZ3		1	0	0	0	0	0	0
605	PFR_JS13-1_593	GTP-dependent nucleic acid-binding protein EngD	697686	698759	+	PROKKA_00602	Ribosome-binding ATPase YchF	697686	698759	+		ychF	similar to AA sequence:UniProtKB:P44681		1	0	0	0	0	0	0
606	PFR_JS13-1_594	Hypothetical protein	699107	699238	-	PROKKA_00603	hypothetical protein	699107	699238	-					0	0	0	0	0	0	0
607	PFR_JS13-1_595	Abortive infection bacteriophage resistance	699812	701344	+	PROKKA_00604	Abi-like protein	699812	701344	+			protein motif:Pfam:PF07751.5		0	0	0	0	0	0	0
608	PFR_JS13-1_596	Hypothetical protein	701515	702114	+	PROKKA_00605	hypothetical protein	701515	702114	+					0	0	0	0	0	0	0
609	PFR_JS13-1_597	Hypothetical protein	702111	703418	+	PROKKA_00606	hypothetical protein	702111	703418	+					0	0	0	0	0	0	0
610	PFR_JS13-1_598	Abi family protein	703736	704665	+	PROKKA_00607	Abi-like protein	703736	704665	+			protein motif:Pfam:PF07751.5		0	0	0	0	0	0	0
611	PFR_JS13-1_599	Hypothetical protein	704923	705480	+	PROKKA_00608	hypothetical protein	704923	705480	+					0	1	1	0	0	0	0
612	PFR_JS13-1_600	Hypothetical protein	706268	706492	+	PROKKA_00609	hypothetical protein	706268	706492	+					0	1	1	0	0	0	0
613	PFR_JS13-1_601	Hypothetical protein	706492	707601	+	PROKKA_00610	hypothetical protein	706492	707601	+					0	1	1	0	0	0	0
614	PFR_JS13-1_602	Hypothetical protein	707695	708189	+	PROKKA_00611	hypothetical protein	707695	708189	+					0	1	1	0	0	0	0
615	PFR_JS13-1_603	Insertion sequence IS407 OrfB	708147	708962	-	PROKKA_00612	Integrase core domain protein	708147	708962	-			protein motif:Pfam:PF00665.20		0	1	1	0	0	0	0
616	PFR_JS13-1_604	Transposase of ISAar43, IS3 family, IS407 group,	709013	709297	-	PROKKA_00613	Transposase	709013	709297	-			protein motif:Pfam:PF01527.14		0	1	1	0	0	0	0
617	PFR_JS13-1_605	Hypothetical protein	709501	709716	+	PROKKA_00614	hypothetical protein	709501	709716	+					0	1	1	0	0	0	0
618	PFR_JS13-1_606	Transcriptional regulator	709680	710645	-	PROKKA_00615	HTH-type transcriptional regulator GltC	709680	710645	-		gltC	similar to AA sequence:UniProtKB:P20668		0	1	1	0	0	0	0
619	PFR_JS13-1_607	Inner membrane transport protein ynfM	710803	711954	+	PROKKA_00616	Inner membrane transport protein YnfM	710803	711954	+		ynfM	similar to AA sequence:UniProtKB:P43531		0	0	0	0	0	0	0
620	PFR_JS13-1_608	FrnE protein	712361	713056	+	PROKKA_00617	DSBA-like thioredoxin domain protein	712361	713056	+			protein motif:Pfam:PF01323.14		0	0	0	0	0	0	0
621	PFR_JS13-1_609	Hypothetical protein	713629	714501	+	PROKKA_00618	Pentapeptide repeats (8 copies)	713629	714501	+			protein motif:Pfam:PF00805.16		0	0	0	0	0	0	0
622	PFR_JS13-1_610	Hypothetical protein	714580	714846	+	PROKKA_00619	anaerobic benzoate catabolism transcriptional regulator	714580	714846	+			protein motif:CLUSTERS:PRK08154		0	0	0	0	0	0	0
623	PFR_JS13-1_611	GlpP family transcriptional regulator	714825	715484	-	PROKKA_00620	Glycerol-3-phosphate responsive antiterminator	714825	715484	-			protein motif:Pfam:PF04309.6		0	0	0	0	0	0	0
624	PFR_JS13-1_612	Alkylglycerone-phosphate synthase	715573	717105	-	PROKKA_00621	putative FAD-linked oxidoreductase	715573	717105	-	1.-.-.-		similar to AA sequence:UniProtKB:Q50685		0	0	0	0	0	0	0
625	PFR_JS13-1_613	Glycerol-3-phosphate dehydrogenase glpD2	717102	718787	-	PROKKA_00622	Aerobic glycerol-3-phosphate dehydrogenase	717102	718787	-	1.1.5.3	glpD	similar to AA sequence:UniProtKB:P18158		0	0	0	0	0	0	0
626	PFR_JS13-1_614	Putative arsenite efflux pump	718927	719664	+	PROKKA_00623	hypothetical protein	718927	719664	+					0	0	0	0	0	0	0
627	PFR_JS13-1_615	UPF0324 membrane protein	719746	720906	-	PROKKA_00624	hypothetical protein	719746	720906	-					0	0	0	0	0	0	0
628	PFR_JS13-1_616	Hypothetical protein	720903	721076	-	PROKKA_00625	hypothetical protein	720903	721076	-					0	0	0	0	0	0	0
629	PFR_JS13-1_617	Thiamine-phosphate diphosphorylase	721591	722238	-	PROKKA_00626	Thiamine-phosphate synthase	721591	722238	-	2.5.1.3	thiE_1	similar to AA sequence:UniProtKB:P66916		0	0	0	0	0	0	0
630	PFR_JS13-1_618	Glycine oxidase ThiO	722414	723667	+	PROKKA_00627	Hydrogen cyanide synthase subunit HcnC precursor	722414	723667	+	1.4.99.5	hcnC	similar to AA sequence:UniProtKB:G3XD12		0	0	0	0	0	0	0
631	PFR_JS13-1_619	Thiamine biosynthesis protein	723664	723897	+	PROKKA_00628	sulfur carrier protein ThiS	723664	723897	+			protein motif:CLUSTERS:PRK05863		0	0	0	0	0	0	0
632	PFR_JS13-1_620	Thiazole synthase	723900	724730	+	PROKKA_00629	Thiazole synthase	723900	724730	+	2.8.1.10	thiG	similar to AA sequence:UniProtKB:A0QQL0		0	0	0	0	0	0	0
633	PFR_JS13-1_621	Molybdenum cofactor biosynthesis protein moeB2	724739	725950	+	PROKKA_00630	putative adenylyltransferase/sulfurtransferase MoeZ	724739	725950	+		moeZ_2	similar to AA sequence:UniProtKB:Q7D5X9		0	0	0	0	0	0	0
634	PFR_JS13-1_622	UPF0324 membrane protein	726037	727119	-	PROKKA_00631	hypothetical protein	726037	727119	-					0	0	0	0	0	0	0
635	PFR_JS13-1_623	Transcriptional regulator	727156	728109	+	PROKKA_00632	HTH-type transcriptional regulator CysL	727156	728109	+		cysL	similar to AA sequence:UniProtKB:P39647		0	0	0	0	0	0	0
636	PFR_JS13-1_624	Hypothetical protein	728113	728328	-	PROKKA_00633	hypothetical protein	728113	728328	-					0	0	0	0	0	0	0
637	PFR_JS13-1_625	Carbon starvation protein	728318	730714	-	PROKKA_00634	Carbon starvation protein A	728318	730714	-		cstA	similar to AA sequence:UniProtKB:P15078		0	0	0	0	0	0	0
638	PFR_JS13-1_626	Glycerate kinase (Fragment)	731079	731678	+	PROKKA_00635	Glycerate 2-kinase	731079	731678	+	2.7.1.165	garK_1	similar to AA sequence:UniProtKB:P23524		0	0	0	0	0	0	0
639	PFR_JS13-1_627	Hypothetical protein	731657	732196	+	PROKKA_00636	Glycerate 2-kinase	731657	732196	+	2.7.1.165	garK_2	similar to AA sequence:UniProtKB:P23524		0	0	0	0	0	0	0
640	PFR_JS13-1_628	MFS transporter	732260	734029	-	PROKKA_00637	Antiseptic resistance protein	732260	734029	-		qacA_1	similar to AA sequence:UniProtKB:P0A0J9		0	0	0	0	0	0	0
641	PFR_JS13-1_629	Glyoxalase/bleomycin resistance	734243	735136	-	PROKKA_00638	3-demethylubiquinone-9 3-methyltransferase	734243	735136	-			protein motif:Pfam:PF06983.7		0	0	0	0	0	0	0
642	PFR_JS13-1_630	Peptidyl-tRNA hydrolase PTH2	735237	735950	+	PROKKA_00639	hypothetical protein	735237	735950	+					0	0	0	0	0	0	0
643	PFR_JS13-1_631	ABC transporter, quaternary amine uptake	735988	736887	+	PROKKA_00640	Putative osmoprotectant uptake system substrate-binding protein OsmF precursor	735988	736887	+		osmF_1	similar to AA sequence:UniProtKB:P33362		0	0	0	0	0	0	0
644	PFR_JS13-1_632	Cyanate permease	737035	738312	+	PROKKA_00641	putative transporter YycB	737035	738312	+		yycB	similar to AA sequence:UniProtKB:P37482		0	0	0	0	0	0	0
645	PFR_JS13-1_633	Hypothetical protein	738415	738639	-	PROKKA_00642	hypothetical protein	738415	738639	-					0	0	0	0	0	0	0
646	PFR_JS13-1_634	Band 7 protein	738652	739620	-	PROKKA_00643	SPFH domain / Band 7 family protein	738652	739620	-			protein motif:Pfam:PF01145.19		0	0	0	0	0	0	0
647	PFR_JS13-1_635	Cysteine synthase	739840	740808	-	PROKKA_00644	Cysteine synthase	739840	740808	-	2.5.1.47	cysK	similar to AA sequence:UniProtKB:P63871		1	0	0	0	0	0	0
648	PFR_JS13-1_636	Diacylglycerol kinase catalytic region	741253	742308	+	PROKKA_00645	Diacylglycerol kinase	741253	742308	+	2.7.1.107	dagK_1	similar to AA sequence:UniProtKB:O31502		0	0	0	0	0	0	0
649	PFR_JS13-1_637	Hypothetical protein	742399	743577	-	PROKKA_00646	hypothetical protein	742399	743577	-					0	0	0	0	0	0	0
650	PFR_JS13-1_638	Peptidase M20D, amidohydrolase	743738	744907	+	PROKKA_00647	putative hydrolase YxeP	743738	744907	+	3.-.-.-	yxeP_3	similar to AA sequence:UniProtKB:P54955		1	0	0	0	0	0	0
651	PFR_JS13-1_639	Phosphoribosyl transferase domain protein	745003	745509	-	PROKKA_00648	Xanthine phosphoribosyltransferase	745003	745509	-	2.4.2.22	gpt	similar to AA sequence:UniProtKB:P0A9M5		0	0	0	0	0	0	0
652	PFR_JS13-1_640	N-acetyltransferase yncA	745569	746081	-	PROKKA_00649	N-acyltransferase YncA	745569	746081	-	2.3.1.-	yncA	similar to AA sequence:UniProtKB:P76112		0	0	0	0	0	0	0
653	PFR_JS13-1_641	Regulatory protein, MarR	746222	746767	+	PROKKA_00650	DNA-binding transcriptional repressor MarR	746222	746767	+			protein motif:CLUSTERS:PRK11512		0	0	0	0	0	0	0
654	PFR_JS13-1_642	Major facilitator superfamily (MFS) multidrug	746764	748101	+	PROKKA_00651	enterobactin exporter EntS	746764	748101	+			protein motif:CLUSTERS:PRK10489		0	0	0	0	0	0	0
655	PFR_JS13-1_643	Transporter, anaerobic C4-dicarboxylate uptake	748198	749493	-	PROKKA_00652	Anaerobic C4-dicarboxylate transporter DcuA	748198	749493	-		dcuA	similar to AA sequence:UniProtKB:P0ABN5		0	0	0	0	0	0	0
656	PFR_JS13-1_644	Aspartate ammonia-lyase (Aspartase)	749498	750970	-	PROKKA_00653	Aspartate ammonia-lyase	749498	750970	-	4.3.1.1	aspA_1	similar to AA sequence:UniProtKB:P0AC38		0	0	0	0	0	0	0
657	PFR_JS13-1_645	Uma4 protein	751238	752311	-	PROKKA_00654	Transposase	751238	752311	-			protein motif:Pfam:PF01610.11		0	0	0	0	0	0	0
658	PFR_JS13-1_646	Aspartate ammonia-lyase (Aspartase)	752762	754231	-	PROKKA_00655	Aspartate ammonia-lyase	752762	754231	-	4.3.1.1	aspA_2	similar to AA sequence:UniProtKB:P0AC38		1	0	0	0	0	0	0
659	PFR_JS13-1_647	Hypothetical protein	754443	754805	-	PROKKA_00656	hypothetical protein	754443	754805	-					1	0	0	0	0	0	0
660	PFR_JS13-1_648	Fumarate hydratase class II	754969	756393	-	PROKKA_00657	Fumarate hydratase class II	754969	756393	-	4.2.1.2	fumC	similar to AA sequence:UniProtKB:Q92PB6		1	0	0	0	0	0	0
661	PFR_JS13-1_649	Putative glyoxylate reductase	756557	757525	-	PROKKA_00658	Putative 2-hydroxyacid dehydrogenase	756557	757525	-	1.1.1.-		similar to AA sequence:UniProtKB:Q99RW8		1	0	0	0	0	0	0
662	PFR_JS13-1_650	Putative FERREDOXIN FDXC	757761	758081	+	PROKKA_00659	Ferredoxin	757761	758081	+			similar to AA sequence:UniProtKB:P13279		1	0	0	0	0	0	0
663	PFR_JS13-1_651	Succinyldiaminopimelate transaminase	758078	759169	+	PROKKA_00660	LL-diaminopimelate aminotransferase	758078	759169	+	2.6.1.83	dapL	similar to AA sequence:UniProtKB:Q7NDX4		1	0	0	0	0	0	0
664	PFR_JS13-1_652	Conserved hypothetical secreted protein	759197	760042	-	PROKKA_00661	hypothetical protein	759197	760042	-					1	0	0	0	0	0	0
665	PFR_JS13-1_653	2,3,4,5-tetrahydropyridine-2-carboxylateN-succiny	760049	760987	-	PROKKA_00662	2,3,4,5-tetrahydropyridine-2,6-dicarboxylate N-succinyltransferase	760049	760987	-	2.3.1.117	dapD	similar to AA sequence:UniProtKB:O05302		1	0	0	0	0	0	0
666	PFR_JS13-1_654	Succinyl-diaminopimelate desuccinylase	761087	762175	+	PROKKA_00663	Succinyl-diaminopimelate desuccinylase	761087	762175	+	3.5.1.18	dapE_1	similar to AA sequence:UniProtKB:Q59284		1	0	0	0	0	0	0
667	PFR_JS13-1_655	Rossmann fold nucleotide-binding protein	762337	763173	+	PROKKA_00664	LOG family protein ORF6 in fasciation locus	762337	763173	+		fas6	similar to AA sequence:UniProtKB:P46378		1	0	0	0	0	0	0
668	PFR_JS13-1_656	Chloride transporter, chloride channel family	763388	764713	+	PROKKA_00665	H(+)/Cl(-) exchange transporter ClcA	763388	764713	+		clcA	similar to AA sequence:UniProtKB:Q8ZRP8		1	0	0	0	0	0	0
669	PFR_JS13-1_657	Hypothetical protein	764736	765128	+	PROKKA_00666	hypothetical protein	764736	765128	+					1	0	0	0	0	0	0
670	PFR_JS13-1_658	Hypothetical protein	765188	765355	+	PROKKA_00667	hypothetical protein	765188	765355	+					1	0	0	0	0	0	0
671	PFR_JS13-1_659	Starch synthase	765533	766750	-	PROKKA_00668	Capsular glucan synthase	765533	766750	-	2.4.1.21	glgA	similar to AA sequence:UniProtKB:O05313		1	0	0	0	0	0	0
672	PFR_JS13-1_660	Glucose-1-phosphate adenylyltransferase 2	766905	768095	+	PROKKA_00669	Glucose-1-phosphate adenylyltransferase	766905	768095	+	2.7.7.27	glgC	similar to AA sequence:UniProtKB:P64241		1	0	0	0	0	0	0
673	PFR_JS13-1_661	O-methyltransferase mdmC	768233	768898	-	PROKKA_00670	Putative O-methyltransferase/MSMEI_4947	768233	768898	-	2.1.1.-		similar to AA sequence:UniProtKB:A0R2D5		1	0	0	0	0	0	0
674	PFR_JS13-1_662	Dihydrodipicolinate synthase	769042	769923	+	PROKKA_00671	4-hydroxy-tetrahydrodipicolinate synthase	769042	769923	+	4.3.3.7	dapA	similar to AA sequence:UniProtKB:P63945		1	0	0	0	0	0	0
675	PFR_JS13-1_663	Sec-independent protein translocase protein TatB	770015	770464	+	PROKKA_00672	sec-independent translocase	770015	770464	+			protein motif:CLUSTERS:PRK01371		1	0	0	0	0	0	0
676	PFR_JS13-1_664	Mrp ATPase family protein	770631	771788	-	PROKKA_00673	Flagellum site-determining protein YlxH	770631	771788	-		ylxH	similar to AA sequence:UniProtKB:P40742		1	0	0	0	0	0	0
677	PFR_JS13-1_665	PF06210 family protein	771932	772495	-	PROKKA_00674	hypothetical protein	771932	772495	-					1	0	0	0	0	0	0
678	PFR_JS13-1_666	Hypothetical protein	772492	773769	-	PROKKA_00675	Magnesium transporter MgtE	772492	773769	-			similar to AA sequence:UniProtKB:Q5SMG8		1	0	0	0	0	0	0
679	PFR_JS13-1_667	Hypothetical protein	773950	774813	+	PROKKA_00676	(3S)-malyl-CoA thioesterase	773950	774813	+	3.1.2.-	mcl2	similar to AA sequence:UniProtKB:D3JV05		1	0	0	0	0	0	0
680	PFR_JS13-1_668	Hypothetical protein	774958	775833	+	PROKKA_00677	hypothetical protein	774958	775833	+					1	0	0	0	0	0	0
681	PFR_JS13-1_669	Hypothetical protein	775960	777414	-	PROKKA_00678	Xaa-Pro aminopeptidase 1	775960	777414	-	3.4.11.9	pepPI	similar to AA sequence:UniProtKB:P0A3Z2		1	0	0	0	0	0	0
682	PFR_JS13-1_670	Hypothetical protein	777587	778330	+	PROKKA_00679	Chromosome partition protein Smc	777587	778330	+		smc_1	protein motif:HAMAP:MF_01894		1	0	0	0	0	0	0
683	PFR_JS13-1_671	Hypothetical protein	778141	778851	-	PROKKA_00680	hypothetical protein	778141	778851	-					0	0	0	0	0	0	0
684	PFR_JS13-1_672	Hypothetical protein	778909	779568	+	PROKKA_00681	S-layer protein precursor	778909	779568	+		ctc	similar to AA sequence:UniProtKB:Q9ZES5		1	0	0	0	0	0	0
685	PFR_JS13-1_673	Methionyl aminopeptidase	779707	780615	-	PROKKA_00682	Methionine aminopeptidase 2	779707	780615	-	3.4.11.18	map_1	similar to AA sequence:UniProtKB:P0A5J2		1	0	0	0	0	0	0
686	PFR_JS13-1_674	Hypothetical protein	780695	781600	-	PROKKA_00683	hypothetical protein	780695	781600	-					0	0	0	0	0	0	0
687	PFR_JS13-1_675	Glutamine synthetase, type I	781807	783141	+	PROKKA_00684	putative glutamine synthetase 2	781807	783141	+	6.3.1.2	glnA_1	similar to AA sequence:UniProtKB:A0R083		1	0	0	0	0	0	0
688	PFR_JS13-1_676	Hypothetical protein	783197	783934	-	PROKKA_00685	hypothetical protein	783197	783934	-					1	0	0	0	0	0	0
689	PFR_JS13-1_677	Glutamate-ammonia-ligase adenylyltransferase	784175	787141	+	PROKKA_00686	Glutamate-ammonia-ligase adenylyltransferase	784175	787141	+	2.7.7.42	glnE	similar to AA sequence:UniProtKB:P30870		1	0	0	0	0	0	0
690	PFR_JS13-1_678	Putative oxidoreductase in MprA 5'region	787138	787953	+	PROKKA_00687	short chain dehydrogenase	787138	787953	+			protein motif:CLUSTERS:PRK07904		1	0	0	0	0	0	0
691	PFR_JS13-1_679	Transcriptional regulator	787973	788557	-	PROKKA_00688	Tetracycline repressor protein class A from transposon 1721	787973	788557	-		tetR_2	similar to AA sequence:UniProtKB:P03038	Putative antibiotic resistance	1	0	0	0	0	0	0
692	PFR_JS13-1_680	Hypothetical protein	788645	789235	-	PROKKA_00689	hypothetical protein	788645	789235	-					1	0	0	0	0	0	0
693	PFR_JS13-1_681	Glutamate--ammonia ligase	789480	790919	-	PROKKA_00690	Glutamine synthetase	789480	790919	-	6.3.1.2	glnA_2	similar to AA sequence:UniProtKB:P15106		1	0	0	0	0	0	0
694	PFR_JS13-1_682	Oleandomycin resistance ATPase	791095	792906	-	PROKKA_00691	putative ABC transporter ATP-binding protein	791095	792906	-			similar to AA sequence:UniProtKB:P45127		1	0	0	0	0	0	0
695	PFR_JS13-1_683	Integral membrane protein	792939	793709	-	PROKKA_00692	hypothetical protein	792939	793709	-					1	0	0	0	0	0	0
696	PFR_JS13-1_684	Hypothetical protein	794010	795770	-	PROKKA_00693	Dihydrolipoyllysine-residue acetyltransferase component of pyruvate dehydrogenase complex	794010	795770	-	2.3.1.12	aceF	similar to AA sequence:UniProtKB:Q8NNJ2		1	0	0	0	0	0	0
697	PFR_JS13-1_685	Aminomethyltransferase	796071	797192	+	PROKKA_00694	Aminomethyltransferase	796071	797192	+	2.1.2.10	gcvT	similar to AA sequence:UniProtKB:P54378		1	0	0	0	0	0	0
698	PFR_JS13-1_686	Hypothetical protein	797368	797583	-	PROKKA_00695	hypothetical protein	797368	797583	-					1	0	0	0	0	0	0
699	PFR_JS13-1_687	Integral membrane protein	797583	798137	-	PROKKA_00696	hypothetical protein	797583	798137	-					1	0	0	0	0	0	0
700	PFR_JS13-1_688	Phage shock protein A, PspA	798437	799231	+	PROKKA_00697	hypothetical protein	798437	799231	+			similar to AA sequence:UniProtKB:P54617	Phage shock protein A homolog	1	0	0	0	0	0	0
701	PFR_JS13-1_689	Hypothetical protein	799228	799518	+	PROKKA_00698	hypothetical protein	799228	799518	+					1	0	0	0	0	0	0
702	PFR_JS13-1_690	Hypothetical protein	799579	800454	+	PROKKA_00699	glycerate kinase I	799579	800454	+			protein motif:CLUSTERS:PRK10342		1	0	0	0	0	0	0
703	PFR_JS13-1_691	Iron-sulfur cluster assembly accessory protein	800612	800962	+	PROKKA_00700	Iron-sulfur cluster insertion protein ErpA	800612	800962	+		erpA	similar to AA sequence:UniProtKB:P45344		1	0	0	0	0	0	0
704	PFR_JS13-1_692	IMP dehydrogenase family protein	801104	802567	-	PROKKA_00701	Inosine-5'-monophosphate dehydrogenase	801104	802567	-	1.1.1.205	guaB_1	similar to AA sequence:UniProtKB:P99106		1	0	0	0	0	0	0
705	PFR_JS13-1_693	Response regulator	802780	803304	+	PROKKA_00702	putative response regulatory protein/MT3230	802780	803304	+			similar to AA sequence:UniProtKB:P95183		1	0	0	0	0	0	0
706	PFR_JS13-1_694	Anthranilate phosphoribosyltransferase	803304	804353	+	PROKKA_00703	Anthranilate phosphoribosyltransferase	803304	804353	+	2.4.2.18	trpD	similar to AA sequence:UniProtKB:A0R048		1	0	0	0	0	0	0
707	PFR_JS13-1_695	Hypothetical protein	804394	804819	-	PROKKA_00704	hypothetical protein	804394	804819	-					1	0	0	0	0	0	0
708	PFR_JS13-1_696	Peptidase, A24 type IV prepilin peptidase family	804959	805642	-	PROKKA_00705	hypothetical protein	804959	805642	-					1	0	0	0	0	0	0
709	PFR_JS13-1_697	Hypothetical protein	805668	806318	-	PROKKA_00706	hypothetical protein	805668	806318	-					1	0	0	0	0	0	0
710	PFR_JS13-1_698	Acetyltransferase, GNAT family	806410	807507	-	PROKKA_00707	Phosphoribosyl-ATP pyrophosphohydrolase	806410	807507	-			protein motif:Pfam:PF01503.11		1	0	0	0	0	0	0
711	PFR_JS13-1_699	Hypothetical protein	807697	808713	-	PROKKA_00708	hypothetical protein	807697	808713	-					1	0	0	0	0	0	0
712	PFR_JS13-1_700	Peptidylprolyl isomerase	809040	809552	+	PROKKA_00709	Peptidyl-prolyl cis-trans isomerase B	809040	809552	+	5.2.1.8	cypB	similar to AA sequence:UniProtKB:P77949		1	0	0	0	0	0	0
713	PFR_JS13-1_701	Transcriptional regulator, AsnC family	809794	810063	-	PROKKA_00710	AsnC family protein	809794	810063	-			protein motif:Pfam:PF01037.15		1	0	0	0	0	0	0
714	PFR_JS13-1_702	Peptidase M23B family / metalloendopeptidase	810323	811444	+	PROKKA_00711	Murein DD-endopeptidase MepM	810323	811444	+	3.4.24.-	mepM_1	similar to AA sequence:UniProtKB:P0AFS9		1	0	0	0	0	0	0
715	PFR_JS13-1_703	Acyltransferase PlsC	811561	812406	+	PROKKA_00712	2-acyl-glycerophospho-ethanolamine acyltransferase	811561	812406	+			protein motif:CLUSTERS:PRK08633		1	0	0	0	0	0	0
716	PFR_JS13-1_704	1-acyl-sn-glycerol-3-phosphate acyltransferase	812399	813340	+	PROKKA_00713	Acyltransferase	812399	813340	+			protein motif:Pfam:PF01553.15		1	0	0	0	0	0	0
717	PFR_JS13-1_705	3-deoxy-7-phosphoheptulonate synthase	813489	814835	+	PROKKA_00714	Phospho-2-dehydro-3-deoxyheptonate aldolase	813489	814835	+	2.5.1.54	aroH	similar to AA sequence:UniProtKB:P80574		1	0	0	0	0	0	0
718	PFR_JS13-1_706	Zn-dependent hydrolase of the beta-lactamase	814866	815609	+	PROKKA_00715	metal-dependent hydrolase	814866	815609	+			protein motif:CLUSTERS:PRK00685		1	0	0	0	0	0	0
719	PFR_JS13-1_707	Membrane spanning protein DUF6	815622	816545	-	PROKKA_00716	EamA-like transporter family protein	815622	816545	-			protein motif:Pfam:PF00892.14		1	0	0	0	0	0	0
720	PFR_JS13-1_708	Hypothetical protein	816588	818792	-	PROKKA_00717	Serine/threonine-protein kinase PK-1	816588	818792	-	2.7.11.1	spk1	similar to AA sequence:UniProtKB:Q9KIG4		1	0	0	0	0	0	0
721	PFR_JS13-1_709	Polyprenyl synthetase	818915	819985	-	PROKKA_00718	(2E,6E)-farnesyl diphosphate synthase	818915	819985	-	2.5.1.10		similar to AA sequence:UniProtKB:P0A5H8		1	0	0	0	0	0	0
722	PFR_JS13-1_710	Methylenetetrahydrofolate reductase (NAD(P)H)	820031	820972	+	PROKKA_00719	5,10-methylenetetrahydrofolate reductase	820031	820972	+	1.5.1.20	metF	similar to AA sequence:UniProtKB:P0AEZ1		1	0	0	0	0	0	0
723	PFR_JS13-1_711	DNA or RNA helicase, Superfamily I family	820926	823136	-	PROKKA_00720	Helicase IV	820926	823136	-	3.6.4.12	helD	similar to AA sequence:UniProtKB:O32215		1	0	0	0	0	0	0
724	PFR_JS13-1_712	Hypothetical protein	823350	823751	+	PROKKA_00721	hypothetical protein	823350	823751	+					1	0	0	0	0	0	0
725	PFR_JS13-1_713	DNA polymerase III, alpha subunit	823763	827383	+	PROKKA_00722	DNA polymerase III subunit alpha	823763	827383	+	2.7.7.7	dnaE_1	similar to AA sequence:UniProtKB:P10443		1	0	0	0	0	0	0
726	PFR_JS13-1_714	DNA polymerase IV	827410	828651	+	PROKKA_00723	DNA polymerase IV	827410	828651	+	2.7.7.7	dinB_1	similar to AA sequence:UniProtKB:Q47155		1	0	0	0	0	0	0
727	PFR_JS13-1_715	Hypothetical protein	828691	829074	+	PROKKA_00724	hypothetical protein	828691	829074	+					1	0	0	0	0	0	0
728	PFR_JS13-1_716	Protein MraZ	829297	829734	+	PROKKA_00725	cell division protein MraZ	829297	829734	+			protein motif:CLUSTERS:PRK00326		1	0	0	0	0	0	0
729	PFR_JS13-1_717	Ribosomal RNA small subunit methyltransferase H	829913	830941	+	PROKKA_00726	Ribosomal RNA small subunit methyltransferase H	829913	830941	+	2.1.1.199	rsmH	similar to AA sequence:UniProtKB:P60392		1	0	0	0	0	0	0
730	PFR_JS13-1_718	Hypothetical protein	830938	831456	+	PROKKA_00727	Cell division protein FtsL	830938	831456	+		ftsL	protein motif:HAMAP:MF_00910		1	0	0	0	0	0	0
731	PFR_JS13-1_719	Penicillin binding protein transpeptidase domain	831453	833516	+	PROKKA_00728	Penicillin-binding protein PbpB	831453	833516	+	2.4.1.129	pbpB	similar to AA sequence:UniProtKB:A0R022		1	0	0	0	0	0	0
732	PFR_JS13-1_720	UDP-N-acetylmuramoyl-L-alanyl-D-glutamate--2,6-di	833516	835105	+	PROKKA_00729	UDP-N-acetylmuramoyl-L-alanyl-D-glutamate--2,6-diaminopimelate ligase	833516	835105	+	6.3.2.13	murE	similar to AA sequence:UniProtKB:P65477		1	0	0	0	0	0	0
733	PFR_JS13-1_721	UDP-N-acetylmuramoyl-tripeptide--D-alanyl-D-alani	835107	836591	+	PROKKA_00730	UDP-N-acetylmuramoyl-tripeptide--D-alanyl-D-alanine ligase	835107	836591	+	6.3.2.10	murF	similar to AA sequence:UniProtKB:P11880		1	0	0	0	0	0	0
734	PFR_JS13-1_722	Phospho-N-acetylmuramoyl-pentappeptidetransferase	836588	837664	+	PROKKA_00731	Phospho-N-acetylmuramoyl-pentapeptide-transferase	836588	837664	+	2.7.8.13	mraY	similar to AA sequence:UniProtKB:P0A6W3		1	0	0	0	0	0	0
735	PFR_JS13-1_723	UDP-N-acetylmuramoylalanine--D-glutamate ligase	837724	839145	+	PROKKA_00732	UDP-N-acetylmuramoylalanine--D-glutamate ligase	837724	839145	+	6.3.2.9	murD	similar to AA sequence:UniProtKB:A5U4I2		1	0	0	0	0	0	0
736	PFR_JS13-1_724	Cell division protein FtsW	839338	840603	+	PROKKA_00733	Lipid II flippase FtsW	839338	840603	+		ftsW_2	similar to AA sequence:UniProtKB:P63762		1	0	0	0	0	0	0
737	PFR_JS13-1_725	UDP-N-acetylglucosamine--N-acetylmuramyl-(Pentape	840603	841703	+	PROKKA_00734	UDP-N-acetylglucosamine--N-acetylmuramyl-(pentapeptide) pyrophosphoryl-undecaprenol N-acetylglucosamine transferase	840603	841703	+	2.4.1.227	murG	similar to AA sequence:UniProtKB:P17443		1	0	0	0	0	0	0
738	PFR_JS13-1_726	UDP-N-acetylmuramate--L-alanine ligase MurC	841700	843142	+	PROKKA_00735	UDP-N-acetylmuramate--L-alanine ligase	841700	843142	+	6.3.2.8	murC	similar to AA sequence:UniProtKB:P45066		1	0	0	0	0	0	0
739	PFR_JS13-1_727	POTRA domain protein, FtsQ-type	843139	843870	+	PROKKA_00736	Cell division protein FtsQ	843139	843870	+		ftsQ	similar to AA sequence:UniProtKB:P64168		1	0	0	0	0	0	0
740	PFR_JS13-1_728	Cell division protein FtsZ	844088	845329	+	PROKKA_00737	Cell division protein FtsZ	844088	845329	+		ftsZ	similar to AA sequence:UniProtKB:P94337		1	0	0	0	0	0	0
741	PFR_JS13-1_729	YfiH family protein	845339	846127	+	PROKKA_00738	Laccase domain protein YfiH	845339	846127	+		yfiH	similar to AA sequence:UniProtKB:P33644		1	0	0	0	0	0	0
742	PFR_JS13-1_730	Cell division protein sepF	846279	846800	+	PROKKA_00739	Cell division protein SepF	846279	846800	+		sepF	similar to AA sequence:UniProtKB:O31728		1	0	0	0	0	0	0
743	PFR_JS13-1_731	Hypothetical protein	846804	847097	+	PROKKA_00740	YGGT family protein	846804	847097	+			protein motif:Pfam:PF02325.11		1	0	0	0	0	0	0
744	PFR_JS13-1_732	DivIVA domain protein	847234	848232	+	PROKKA_00741	Cell wall synthesis protein Wag31	847234	848232	+			similar to AA sequence:UniProtKB:P0A5N2		1	0	0	0	0	0	0
745	PFR_JS13-1_733	C4-type zinc finger protein, DksA/TraR family	848307	848735	+	PROKKA_00742	RNA polymerase-binding transcription factor DksA	848307	848735	+		dksA	similar to AA sequence:UniProtKB:P0ABS1		1	0	0	0	0	0	0
746	PFR_JS13-1_734	Signal peptidase II	848792	849337	+	PROKKA_00743	lipoprotein signal peptidase	848792	849337	+			protein motif:CLUSTERS:PRK00376		1	0	0	0	0	0	0
747	PFR_JS13-1_735	Pseudouridylate synthase	849334	850254	+	PROKKA_00744	Ribosomal large subunit pseudouridine synthase D	849334	850254	+	5.4.99.23	rluD	similar to AA sequence:UniProtKB:P33643		1	0	0	0	0	0	0
748	PFR_JS13-1_736	Pyruvate kinase	850570	852003	+	PROKKA_00745	Pyruvate kinase	850570	852003	+	2.7.1.40	pyk	similar to AA sequence:UniProtKB:Q46078		1	0	0	0	0	0	0
749						PROKKA_00746	tRNA-Leu(caa)	852249	852333	-			COORDINATES:profile:Aragorn:1.2		0					0	0
750	PFR_JS13-1_737	Response regulator	852553	853176	+	PROKKA_00747	putative transcriptional regulatory protein pdtaR	852553	853176	+		pdtaR	similar to AA sequence:UniProtKB:O06143		1	0	0	0	0	0	0
751	PFR_JS13-1_738	DNA-directed DNA polymerase	853283	855961	+	PROKKA_00748	DNA polymerase I	853283	855961	+	2.7.7.7	polA	similar to AA sequence:UniProtKB:P52026		1	0	0	0	0	0	0
752	PFR_JS13-1_739	Hypothetical protein	855928	856695	-	PROKKA_00749	hypothetical protein	855928	856695	-					1	0	0	0	0	0	0
753	PFR_JS13-1_740	Succinate-semialdehyde dehydrogenase [NADP( )]	856914	858380	+	PROKKA_00750	Succinate-semialdehyde dehydrogenase [NADP(+)] GabD	856914	858380	+	1.2.1.79	gabD	similar to AA sequence:UniProtKB:P25526		1	0	0	0	0	0	0
754	PFR_JS13-1_741	30S ribosomal protein S1	858744	860198	+	PROKKA_00751	30S ribosomal protein S1	858744	860198	+		rpsA	similar to AA sequence:UniProtKB:P0AG67		1	0	0	0	0	0	0
755	PFR_JS13-1_742	Phosphorylase family protein	860315	861091	+	PROKKA_00752	Purine nucleoside phosphorylase DeoD-type	860315	861091	+	2.4.2.1	deoD	similar to AA sequence:UniProtKB:Q5EEL8		1	0	0	0	0	0	0
756	PFR_JS13-1_743	Dephospho-CoA kinase	861095	861763	+	PROKKA_00753	Dephospho-CoA kinase	861095	861763	+	2.7.1.24	coaE	similar to AA sequence:UniProtKB:O67792		1	0	0	0	0	0	0
757	PFR_JS13-1_744	UvrABC system protein B	861838	863922	+	PROKKA_00754	UvrABC system protein B	861838	863922	+		uvrB	similar to AA sequence:UniProtKB:P56981		1	0	0	0	0	0	0
758	PFR_JS13-1_745	Integral membrane protein, TerC family	864113	865147	+	PROKKA_00755	Inner membrane protein alx	864113	865147	+		alx_1	similar to AA sequence:UniProtKB:P42601		1	0	0	0	0	0	0
759	PFR_JS13-1_746	Zn-dependent hydrolases	865182	865775	-	PROKKA_00756	hydroxyacylglutathione hydrolase	865182	865775	-			protein motif:CLUSTERS:PRK10241		1	0	0	0	0	0	0
760	PFR_JS13-1_747	TIGR03083 family protein	865777	866523	-	PROKKA_00757	mycothiol-dependent maleylpyruvate isomerase	865777	866523	-			protein motif:CLUSTERS:PRK09583		1	0	0	0	0	0	0
761	PFR_JS13-1_748	UvrABC system protein A	866735	869800	+	PROKKA_00758	UvrABC system protein A	866735	869800	+		uvrA_2	similar to AA sequence:UniProtKB:P63380		1	0	0	0	0	0	0
762	PFR_JS13-1_749	GNAT family acetyltransferase	869815	870351	-	PROKKA_00759	hypothetical protein	869815	870351	-					1	0	0	0	0	0	0
763	PFR_JS13-1_750	ABC-type Na efflux pump permease component	870493	871659	-	PROKKA_00760	ABC-2 family transporter protein	870493	871659	-			protein motif:Pfam:PF12698.1		1	0	0	0	0	0	0
764	PFR_JS13-1_751	YhaQ	871656	872537	-	PROKKA_00761	putative ABC transporter ATP-binding protein YxlF	871656	872537	-	3.6.3.-	yxlF	similar to AA sequence:UniProtKB:P94374		0	0	0	0	0	0	0
765	PFR_JS13-1_752	Two-component system response regulator	872640	873293	-	PROKKA_00762	Response regulator protein VraR	872640	873293	-		vraR	similar to AA sequence:UniProtKB:Q7A4R9		1	0	0	0	0	0	0
766	PFR_JS13-1_753	Histidine kinase	873296	874615	-	PROKKA_00763	Sensor histidine kinase DesK	873296	874615	-	2.7.13.3	desK_3	similar to AA sequence:UniProtKB:O34757		1	0	0	0	0	0	0
767	PFR_JS13-1_754	UvrABC system protein C	874757	876751	+	PROKKA_00764	UvrABC system protein C	874757	876751	+		uvrC	similar to AA sequence:UniProtKB:P0A8G0		1	0	0	0	0	0	0
768	PFR_JS13-1_755	P-loop ATP-binding domain protein, PF03668	876947	877831	+	PROKKA_00765	glmZ(sRNA)-inactivating NTPase	876947	877831	+			protein motif:CLUSTERS:PRK05416		1	0	0	0	0	0	0
769	PFR_JS13-1_756	UPF0052 protein ML0564	877828	878796	+	PROKKA_00766	Putative gluconeogenesis factor	877828	878796	+			similar to AA sequence:UniProtKB:P71691		1	0	0	0	0	0	0
770	PFR_JS13-1_757	Putative sporulation transcription regulator	878840	879823	+	PROKKA_00767	Putative sporulation transcription regulator WhiA	878840	879823	+		whiA	similar to AA sequence:UniProtKB:A0QWV9		1	0	0	0	0	0	0
771	PFR_JS13-1_758	ATP-binding protein of ABC transporter system	879889	880611	+	PROKKA_00768	Bacitracin export ATP-binding protein BceA	879889	880611	+		bceA	similar to AA sequence:UniProtKB:O34697		0	0	0	0	0	0	0
772	PFR_JS13-1_759	Efflux ABC transporter, permease protein	880608	881987	+	PROKKA_00769	hypothetical protein	880608	881987	+					0	0	0	0	0	0	0
773	PFR_JS13-1_760	Glyceraldehyde 3-phosphate dehydrogenase gap	882101	883105	+	PROKKA_00770	Glyceraldehyde-3-phosphate dehydrogenase	882101	883105	+	1.2.1.12	gap	similar to AA sequence:UniProtKB:Q01651		1	0	0	0	0	0	0
774	PFR_JS13-1_761	Phosphoglycerate kinase	883270	884481	+	PROKKA_00771	Phosphoglycerate kinase	883270	884481	+	2.7.2.3	pgk	similar to AA sequence:UniProtKB:Q01655		1	0	0	0	0	0	0
775	PFR_JS13-1_762	Triosephosphate isomerase 1	884484	885272	+	PROKKA_00772	Triosephosphate isomerase	884484	885272	+	5.3.1.1	tpiA_2	similar to AA sequence:UniProtKB:P66940		1	0	0	0	0	0	0
776	PFR_JS13-1_763	Hypothetical protein	885395	885655	+	PROKKA_00773	preprotein translocase subunit SecG	885395	885655	+			protein motif:CLUSTERS:PRK06870		1	0	0	0	0	0	0
777	PFR_JS13-1_764	Electron transport protein	885727	886083	+	PROKKA_00774	RNA polymerase-binding protein RbpA	885727	886083	+		rbpA_1	similar to AA sequence:UniProtKB:Q9RKY0		1	0	0	0	0	0	0
778	PFR_JS13-1_765	6-phosphogluconolactonase devB	886400	887158	-	PROKKA_00775	6-phosphogluconolactonase	886400	887158	-	3.1.1.31	pgl_1	similar to AA sequence:UniProtKB:P63338		1	0	0	0	0	0	0
779	PFR_JS13-1_766	Putative OpcA protein	887155	888057	-	PROKKA_00776	Glucose-6-phosphate dehydrogenase subunit	887155	888057	-			protein motif:Pfam:PF10128.3		1	0	0	0	0	0	0
780	PFR_JS13-1_767	Glucose-6-phosphate 1-dehydrogenase Zwf	888068	889663	-	PROKKA_00777	Glucose-6-phosphate 1-dehydrogenase	888068	889663	-	1.1.1.49	zwf	similar to AA sequence:UniProtKB:P0AC53		1	0	0	0	0	0	0
781	PFR_JS13-1_768	HTH-type pyridoxine biosynthesis transcriptional	889816	891246	-	PROKKA_00778	HTH-type transcriptional regulatory protein GabR	889816	891246	-		gabR	similar to AA sequence:UniProtKB:P94426		1	0	0	0	0	0	0
782	PFR_JS13-1_769	Pyridoxal biosynthesis lyase PdxS	891342	892232	+	PROKKA_00779	Pyridoxal biosynthesis lyase PdxS	891342	892232	+	4.-.-.-	pdxS	similar to AA sequence:UniProtKB:P82134		1	0	0	0	0	0	0
783	PFR_JS13-1_770	Glutamine amidotransferase subunit PdxT	892237	892857	+	PROKKA_00780	Glutamine amidotransferase subunit PdxT	892237	892857	+	2.6.-.-	pdxT	similar to AA sequence:UniProtKB:A0QWH0		1	0	0	0	0	0	0
784	PFR_JS13-1_771	Conserved domain protein	892992	893807	-	PROKKA_00781	hypothetical protein	892992	893807	-					1	0	0	0	0	0	0
785	PFR_JS13-1_772	ABC superfamily ATP binding cassette transporter,	893804	894382	-	PROKKA_00782	ABC transporter ATP-binding protein YtrB	893804	894382	-		ytrB	similar to AA sequence:UniProtKB:O34641		1	0	0	0	0	0	0
786	PFR_JS13-1_773	Hypothetical protein	894423	894683	+	PROKKA_00783	hypothetical protein	894423	894683	+					0	1	1	0	0	0	0
787	PFR_JS13-1_774	Hypothetical protein	894673	894891	+	PROKKA_00784	hypothetical protein	894673	894891	+					0	1	1	0	0	0	0
788	PFR_JS13-1_775	Uma4 protein	894863	896209	-	PROKKA_00785	Transposase	894863	896209	-			protein motif:Pfam:PF01610.11		0	1	1	0	0	0	0
789	PFR_JS13-1_776	Undecaprenyl-diphosphatase UppP	896671	897816	-	PROKKA_00786	Undecaprenyl-diphosphatase	896671	897816	-	3.6.1.27	uppP_1	similar to AA sequence:UniProtKB:P60932		0	1	1	0	0	0	0
790	PFR_JS13-1_777	Transcriptional regulator	898040	898372	+	PROKKA_00787	Transcriptional regulator PadR-like family protein	898040	898372	+			protein motif:Pfam:PF03551.8		0	1	1	0	0	0	0
791	PFR_JS13-1_778	Exopolyphosphatase	898362	899621	+	PROKKA_00788	putative amino acid permease YhdG	898362	899621	+		yhdG_3	similar to AA sequence:UniProtKB:O07576		0	1	1	0	0	0	0
792	PFR_JS13-1_779	DNA-binding response regulator TcrA	899820	900536	+	PROKKA_00789	Response regulator ArlR	899820	900536	+		arlR	similar to AA sequence:UniProtKB:P0C000		0	1	1	0	0	0	0
793	PFR_JS13-1_780	ATP-binding region ATPase domain protein	900533	901513	+	PROKKA_00790	Signal transduction histidine-protein kinase ArlS	900533	901513	+	2.7.13.3	arlS	similar to AA sequence:UniProtKB:Q7A5N3		0	1	1	0	0	0	0
794	PFR_JS13-1_781	Thiamine biosynthesis lipoprotein	901521	902378	-	PROKKA_00791	thiamine biosynthesis lipoprotein ApbE	901521	902378	-			protein motif:CLUSTERS:PRK10461		0	1	1	0	0	0	0
795	PFR_JS13-1_782	Hypothetical protein	902375	902893	-	PROKKA_00792	FMN-binding domain protein	902375	902893	-			protein motif:Pfam:PF04205.8		0	1	1	0	0	0	0
796	PFR_JS13-1_783	Ferric reductase domain protein transmembrane	902905	904200	-	PROKKA_00793	3-ketosteroid-9-alpha-hydroxylase reductase subunit	902905	904200	-	1.17.1.-	hmp	similar to AA sequence:UniProtKB:P96853		0	0	0	0	0	0	0
797	PFR_JS13-1_784	Cadmium efflux ATPase	904590	906479	+	PROKKA_00794	Zinc-transporting ATPase	904590	906479	+	3.6.3.-	zosA_2	similar to AA sequence:UniProtKB:O31688		0	0	0	0	0	0	0
798	PFR_JS13-1_785	Hypothetical protein	906567	907112	-	PROKKA_00795	Putative undecaprenyl-diphosphatase YbjG	906567	907112	-	3.6.1.27	ybjG	similar to AA sequence:UniProtKB:P75806		0	0	0	0	0	0	0
799	PFR_JS13-1_786	Activator of Hsp90 ATPase 1 family protein	907470	907931	-	PROKKA_00796	hypothetical protein	907470	907931	-			protein motif:Pfam:PF08327.5	Activator of Hsp90 ATPase homolog 1-like protein	0	0	0	0	0	0	0
800	PFR_JS13-1_787	Peptidase C60 sortase A and B	908239	911256	-	PROKKA_00797	hypothetical protein	908239	911256	-					0	0	0	0	0	0	0
801	PFR_JS13-1_788	TrwC relaxase	911387	914872	+	PROKKA_00798	Multifunctional conjugation protein TraI	911387	914872	+		traI	similar to AA sequence:UniProtKB:P14565		0	0	0	0	0	0	0
802	PFR_JS13-1_789	Hypothetical protein	915050	915451	+	PROKKA_00799	hypothetical protein	915050	915451	+					0	0	0	0	0	0	0
803	PFR_JS13-1_790	Hypothetical protein	915523	915996	+	PROKKA_00800	hypothetical protein	915523	915996	+					0	0	0	0	0	0	0
804	PFR_JS13-1_791	Hypothetical protein	915915	916094	-	PROKKA_00801	hypothetical protein	915915	916094	-					0	0	0	0	0	0	0
805	PFR_JS13-1_792	Hypothetical protein	916158	916457	-	PROKKA_00802	hypothetical protein	916158	916457	-					0	0	0	0	0	0	0
806	PFR_JS13-1_793	Hypothetical protein	916444	917112	-	PROKKA_00803	hypothetical protein	916444	917112	-					0	0	0	0	0	0	0
807	PFR_JS13-1_794	DNA processing Smf-family protein	917166	918197	-	PROKKA_00804	hypothetical protein	917166	918197	-			protein motif:CLUSTERS:PRK10736		0	0	0	0	0	0	0
808	PFR_JS13-1_795	Hypothetical protein	918580	919092	+	PROKKA_00805	error-prone DNA polymerase	918580	919092	+			protein motif:CLUSTERS:PRK05672		0	0	0	0	0	0	0
809	PFR_JS13-1_796	Hypothetical protein	919170	919316	-	PROKKA_00806	Daunorubicin/doxorubicin resistance ATP-binding protein DrrA	919170	919316	-	3.6.3.-	drrA_3	similar to AA sequence:UniProtKB:P32010		0	0	0	0	0	0	0
810	PFR_JS13-1_797	Transcriptional regulator, GntR family	919313	919687	-	PROKKA_00807	HTH-type transcriptional repressor YtrA	919313	919687	-		ytrA_2	similar to AA sequence:UniProtKB:O34712		1	0	0	0	0	0	0
811	PFR_JS13-1_798	Transcriptional regulator, ArsR family	919956	920720	+	PROKKA_00808	hypothetical protein	919956	920720	+					1	0	0	0	0	0	0
812	PFR_JS13-1_799	FeS assembly protein SufB	920717	922174	+	PROKKA_00809	FeS cluster assembly protein SufB	920717	922174	+		sufB	similar to AA sequence:UniProtKB:P77522		1	0	0	0	0	0	0
813	PFR_JS13-1_800	FeS assembly protein SufD	922174	923391	+	PROKKA_00810	FeS cluster assembly protein SufD	922174	923391	+		sufD	similar to AA sequence:UniProtKB:P77689		1	0	0	0	0	0	0
814	PFR_JS13-1_801	Putative ferredoxin subunit of phenylpropionate	923388	923735	+	PROKKA_00811	Benzene 1,2-dioxygenase system ferredoxin subunit	923388	923735	+		bnzC	similar to AA sequence:UniProtKB:P08086		1	0	0	0	0	0	0
815	PFR_JS13-1_802	FeS assembly ATPase SufC	923740	924489	+	PROKKA_00812	Vegetative protein 296	923740	924489	+		yurY	similar to AA sequence:UniProtKB:P80866		1	0	0	0	0	0	0
816	PFR_JS13-1_803	Cysteine desulfurase, SufS family protein	924479	925735	+	PROKKA_00813	putative cysteine desulfurase	924479	925735	+	2.8.1.7	csd	similar to AA sequence:UniProtKB:O32164		1	0	0	0	0	0	0
817	PFR_JS13-1_804	SUF system FeS assembly protein, NifU family	925732	926184	+	PROKKA_00814	NifU-like protein	925732	926184	+		nifU	similar to AA sequence:UniProtKB:O32163		1	0	0	0	0	0	0
818	PFR_JS13-1_805	Metal-sulfur cluster biosynthetic protein	926181	926630	+	PROKKA_00815	hypothetical protein	926181	926630	+					1	0	0	0	0	0	0
819	PFR_JS13-1_806	ABC transporter related protein	926904	928502	+	PROKKA_00816	putative ABC transporter ATP-binding protein YheS	926904	928502	+		yheS_1	similar to AA sequence:UniProtKB:P63389		1	0	0	0	0	0	0
820	PFR_JS13-1_807	Mycinamicin-resistance protein MyrA	928687	929520	-	PROKKA_00817	23S rRNA (guanine(748)-N(1))-methyltransferase	928687	929520	-	2.1.1.188	rlmAII	similar to AA sequence:UniProtKB:Q9S1M6		1	0	0	0	0	0	0
821	PFR_JS13-1_808	Short-chain dehydrogenase/reductase SDR	929528	930274	-	PROKKA_00818	Rhamnolipids biosynthesis 3-oxoacyl-[acyl-carrier-protein] reductase	929528	930274	-	1.1.1.100	rhlG	similar to AA sequence:UniProtKB:Q9RPT1		1	0	0	0	0	0	0
822	PFR_JS13-1_809	3-oxoacyl-[acyl-carrier protein] reductase fabG1	930383	931078	+	PROKKA_00819	3-oxoacyl-[acyl-carrier-protein] reductase FabG1	930383	931078	+	1.1.1.100	fabG1	similar to AA sequence:UniProtKB:P0A5Y4		1	0	0	0	0	0	0
823	PFR_JS13-1_810	Enoyl-(Acyl carrier protein) reductase	931168	931941	+	PROKKA_00820	Enoyl-[acyl-carrier-protein] reductase [NADH]	931168	931941	+	1.3.1.9	inhA	similar to AA sequence:UniProtKB:P0A5Y6		1	0	0	0	0	0	0
824	PFR_JS13-1_811	Hypothetical protein	932016	932765	-	PROKKA_00821	hypothetical protein	932016	932765	-					1	0	0	0	0	0	0
825	PFR_JS13-1_812	ABC-type molybdenum transport system, ATPase	932918	933712	+	PROKKA_00822	putative ABC transporter ATP-binding protein YlmA	932918	933712	+	3.6.3.-	ylmA	similar to AA sequence:UniProtKB:O31723		1	0	0	0	0	0	0
826	PFR_JS13-1_813	Sodium Bile acid symporter family protein	933794	934837	-	PROKKA_00823	Sodium Bile acid symporter family protein	933794	934837	-			protein motif:Pfam:PF01758.10		1	0	0	0	0	0	0
827	PFR_JS13-1_814	RNA methyltransferase, TrmH family	934978	935787	+	PROKKA_00824	Putative TrmH family tRNA/rRNA methyltransferase	934978	935787	+	2.1.1.-		similar to AA sequence:UniProtKB:Q7A794		1	0	0	0	0	0	0
828	PFR_JS13-1_815	Peptide deformylase	935821	936441	-	PROKKA_00825	Peptide deformylase	935821	936441	-	3.5.1.88	def	similar to AA sequence:UniProtKB:Q9I7A8		1	0	0	0	0	0	0
829	PFR_JS13-1_816	Tyrosine recombinase XerC 1	936590	937516	+	PROKKA_00826	Tyrosine recombinase XerC	936590	937516	+		xerC	similar to AA sequence:UniProtKB:O31207		1	0	0	0	0	0	0
830	PFR_JS13-1_817	Peptidase, M23 family	937560	938744	-	PROKKA_00827	Murein DD-endopeptidase MepM	937560	938744	-	3.4.24.-	mepM_2	similar to AA sequence:UniProtKB:P0AFS9		1	0	0	0	0	0	0
831	PFR_JS13-1_818	30S ribosomal protein S2	939038	940015	+	PROKKA_00828	30S ribosomal protein S2	939038	940015	+		rpsB	similar to AA sequence:UniProtKB:P66544		1	0	0	0	0	0	0
832	PFR_JS13-1_819	Translation elongation factor Ts	940054	940866	+	PROKKA_00829	Elongation factor Ts	940054	940866	+		tsf	similar to AA sequence:UniProtKB:A0QVB9		1	0	0	0	0	0	0
833	PFR_JS13-1_820	UMP kinase	941003	941752	+	PROKKA_00830	Uridylate kinase	941003	941752	+	2.7.4.22	pyrH	similar to AA sequence:UniProtKB:A0QVD9		1	0	0	0	0	0	0
834	PFR_JS13-1_821	Ribosome recycling factor	941825	942382	+	PROKKA_00831	Ribosome-recycling factor	941825	942382	+		frr	similar to AA sequence:UniProtKB:Q8NP03		1	0	0	0	0	0	0
835	PFR_JS13-1_822	Phosphatidate cytidylyltransferase	942391	943236	+	PROKKA_00832	Phosphatidate cytidylyltransferase	942391	943236	+	2.7.7.41	cdsA	similar to AA sequence:UniProtKB:P0ABG1		1	0	0	0	0	0	0
836	PFR_JS13-1_823	Ribosomal RNA large subunit methyltransferase N	943233	944369	+	PROKKA_00833	putative dual-specificity RNA methyltransferase RlmN	943233	944369	+	2.1.1.-	rlmN	similar to AA sequence:UniProtKB:Q7A600		1	0	0	0	0	0	0
837	PFR_JS13-1_824	1-deoxy-D-xylulose 5-phosphate reductoisomerase	944440	945633	+	PROKKA_00834	1-deoxy-D-xylulose 5-phosphate reductoisomerase	944440	945633	+	1.1.1.267	dxr	similar to AA sequence:UniProtKB:P64012		1	0	0	0	0	0	0
838	PFR_JS13-1_825	4-hydroxy-3-methylbut-2-en-1-yl diphosphate	945706	946872	+	PROKKA_00835	4-hydroxy-3-methylbut-2-en-1-yl diphosphate synthase	945706	946872	+	1.17.7.1	ispG	similar to AA sequence:UniProtKB:Q81LV7		1	0	0	0	0	0	0
839	PFR_JS13-1_826	Acetyltransferase, GNAT family	947012	947854	+	PROKKA_00836	Mycothiol acetyltransferase	947012	947854	+	2.3.1.189	mshD_2	protein motif:HAMAP:MF_01698		1	0	0	0	0	0	0
840	PFR_JS13-1_827	Prolyl-tRNA synthetase ProS	947939	949759	+	PROKKA_00837	Proline--tRNA ligase	947939	949759	+	6.1.1.15	proS	similar to AA sequence:UniProtKB:A0QVM0		1	0	0	0	0	0	0
841	PFR_JS13-1_828	Hypothetical protein	949818	950804	-	PROKKA_00838	hypothetical protein	949818	950804	-					1	0	0	0	0	0	0
842	PFR_JS13-1_829	Ribosome maturation factor RimP	951074	951547	+	PROKKA_00839	Ribosome maturation factor RimP	951074	951547	+		rimP	similar to AA sequence:UniProtKB:P67220		1	0	0	0	0	0	0
843	PFR_JS13-1_830	Transcription termination factor NusA	951549	952607	+	PROKKA_00840	hypothetical protein	951549	952607	+			similar to AA sequence:UniProtKB:P0A5M2	Transcription termination/antitermination protein NusA	1	0	0	0	0	0	0
844	PFR_JS13-1_831	Hypothetical protein	952754	952951	+	PROKKA_00841	hypothetical protein	952754	952951	+			protein motif:CLUSTERS:PRK09190		0	0	0	0	0	0	0
845	PFR_JS13-1_832	Translation initiation factor IF-2	953147	956068	+	PROKKA_00842	Translation initiation factor IF-2	953147	956068	+		infB	similar to AA sequence:UniProtKB:P04766		1	0	0	0	0	0	0
846	PFR_JS13-1_833	Ribosome-binding factor A	956068	956508	+	PROKKA_00843	Ribosome-binding factor A	956068	956508	+		rbfA	similar to AA sequence:UniProtKB:P65967		1	0	0	0	0	0	0
847	PFR_JS13-1_834	TRNA pseudouridine synthase B	956505	957401	+	PROKKA_00844	tRNA pseudouridine synthase B	956505	957401	+	5.4.99.25	truB	similar to AA sequence:UniProtKB:P62190		1	0	0	0	0	0	0
848	PFR_JS13-1_835	Putative glycerol uptake facilitator	957646	958437	+	PROKKA_00845	putative glycerol uptake facilitator protein	957646	958437	+		glpF	similar to AA sequence:UniProtKB:P19255		1	0	0	0	0	0	0
849	PFR_JS13-1_836	Glycerol kinase	958495	960021	+	PROKKA_00846	Glycerol kinase	958495	960021	+	2.7.1.30	glpK_1	similar to AA sequence:UniProtKB:Q5HGD2		1	0	0	0	0	0	0
850	PFR_JS13-1_837	Riboflavin biosynthesis protein RibF	960347	961324	+	PROKKA_00847	Riboflavin biosynthesis protein RibF	960347	961324	+		ribF	similar to AA sequence:UniProtKB:Q59263		1	0	0	0	0	0	0
851	PFR_JS13-1_838	30S ribosomal protein S15	961428	961691	+	PROKKA_00848	30S ribosomal protein S15	961428	961691	+		rpsO	similar to AA sequence:UniProtKB:P05766		1	0	0	0	0	0	0
852	PFR_JS13-1_839	Polyribonucleotide nucleotidyltransferase	962016	964226	+	PROKKA_00849	Polyribonucleotide nucleotidyltransferase	962016	964226	+	2.7.7.8	pnp	similar to AA sequence:UniProtKB:Q53597		1	0	0	0	0	0	0
853	PFR_JS13-1_840	Dihydrodipicolinate reductase	964432	965172	+	PROKKA_00850	4-hydroxy-tetrahydrodipicolinate reductase	964432	965172	+	1.17.1.8	dapB	similar to AA sequence:UniProtKB:P72024		1	0	0	0	0	0	0
854	PFR_JS13-1_841	Hypothetical protein	965178	965903	+	PROKKA_00851	hypothetical protein	965178	965903	+					1	0	0	0	0	0	0
855	PFR_JS13-1_842	GCN5 N-acetyltransferase	965931	966419	-	PROKKA_00852	Acetyltransferase (GNAT) family protein	965931	966419	-			protein motif:Pfam:PF00583.18		1	0	0	0	0	0	0
856	PFR_JS13-1_843	Putative hydrolase of the metallo-beta-lactamase	966507	968258	+	PROKKA_00853	Putative ribonuclease J	966507	968258	+	3.1.-.-		similar to AA sequence:UniProtKB:O33294		1	0	0	0	0	0	0
857	PFR_JS13-1_844	50S ribosomal protein L28 2	968393	968578	+	PROKKA_00854	50S ribosomal protein L28	968393	968578	+		rpmB	similar to AA sequence:UniProtKB:Q9WY96		1	0	0	0	0	0	0
858	PFR_JS13-1_845	Putative ATP-dependent DNA helicase RecG	968708	970987	+	PROKKA_00855	ATP-dependent DNA helicase RecG	968708	970987	+	3.6.4.12	recG	similar to AA sequence:UniProtKB:P24230		1	0	0	0	0	0	0
859	PFR_JS13-1_846	Pyridoxamine 5'-phosphate oxidase family protein	971094	971516	-	PROKKA_00856	Pyridoxamine 5'-phosphate oxidase	971094	971516	-			protein motif:Pfam:PF12900.1		1	0	0	0	0	0	0
860	PFR_JS13-1_847	RNA methyltransferase, RsmD family	971592	972191	+	PROKKA_00857	Ribosomal RNA small subunit methyltransferase D	971592	972191	+	2.1.1.171	rsmD	similar to AA sequence:UniProtKB:P0ADX9		1	0	0	0	0	0	0
861	PFR_JS13-1_848	Pantetheine-phosphate adenylyltransferase	972184	972669	+	PROKKA_00858	Phosphopantetheine adenylyltransferase	972184	972669	+	2.7.7.3	coaD	similar to AA sequence:UniProtKB:O34797		1	0	0	0	0	0	0
862	PFR_JS13-1_849	Protein of hypothetical function DUF177	972829	973317	+	PROKKA_00859	hypothetical protein	972829	973317	+					1	0	0	0	0	0	0
863	PFR_JS13-1_850	Hypothetical protein	973468	973680	+	PROKKA_00860	50S ribosomal protein L32	973468	973680	+		rpmF	similar to AA sequence:UniProtKB:P80339		1	0	0	0	0	0	0
864	PFR_JS13-1_851	Ribonuclease III	973667	974389	+	PROKKA_00861	Ribonuclease 3	973667	974389	+	3.1.26.3	rnc	similar to AA sequence:UniProtKB:Q9ZBQ7		1	0	0	0	0	0	0
865	PFR_JS13-1_852	Formamidopyrimidine-DNA glycosylase 2	974389	975294	+	PROKKA_00862	Formamidopyrimidine-DNA glycosylase 1	974389	975294	+	3.2.2.23	fpg1	similar to AA sequence:UniProtKB:P64150		1	0	0	0	0	0	0
866	PFR_JS13-1_853	GtrA family protein	975306	975920	+	PROKKA_00863	GtrA-like protein	975306	975920	+			protein motif:Pfam:PF04138.8		1	0	0	0	0	0	0
867	PFR_JS13-1_854	Chromosome segregation protein SMC	975958	979503	+	PROKKA_00864	Chromosome partition protein Smc	975958	979503	+		smc_2	similar to AA sequence:UniProtKB:P51834		1	0	0	0	0	0	0
868	PFR_JS13-1_855	Hypothetical protein	979585	979782	+	PROKKA_00865	hypothetical protein	979585	979782	+					1	0	0	0	0	0	0
869	PFR_JS13-1_856	Signal recognition particle receptor FtsY	979874	981028	+	PROKKA_00866	Signal recognition particle receptor FtsY	979874	981028	+		ftsY	similar to AA sequence:UniProtKB:P51835		1	0	0	0	0	0	0
870	PFR_JS13-1_857	Signal recognition particle protein	981155	982726	+	PROKKA_00867	Signal recognition particle protein	981155	982726	+		ffh	similar to AA sequence:UniProtKB:P66844		1	0	0	0	0	0	0
871	PFR_JS13-1_858	Amidohydrolase family protein	982791	983849	+	PROKKA_00868	hypothetical protein	982791	983849	+					1	0	0	0	0	0	0
872	PFR_JS13-1_859	30S ribosomal protein S16	984027	984518	+	PROKKA_00869	30S ribosomal protein S16	984027	984518	+		rpsP	similar to AA sequence:UniProtKB:A0QV37		1	0	0	0	0	0	0
873	PFR_JS13-1_860	UPF0109 protein PPA1442	984521	984775	+	PROKKA_00870	hypothetical protein	984521	984775	+			protein motif:CLUSTERS:PRK02821		1	0	0	0	0	0	0
874	PFR_JS13-1_861	Ribosome maturation factor RimM	984784	985335	+	PROKKA_00871	Ribosome maturation factor RimM	984784	985335	+		rimM	similar to AA sequence:UniProtKB:A0QV39		1	0	0	0	0	0	0
875	PFR_JS13-1_862	TRNA (guanine-N(1)-)-methyltransferase	985401	986126	+	PROKKA_00872	tRNA (guanine-N(1)-)-methyltransferase	985401	986126	+	2.1.1.228	trmD	similar to AA sequence:UniProtKB:Q2GIL5		1	0	0	0	0	0	0
876	PFR_JS13-1_863	Putative xylan esterase	986134	986832	-	PROKKA_00873	Acetylxylan esterase precursor	986134	986832	-	3.1.1.72	axeA1_1	similar to AA sequence:UniProtKB:D5EV35		1	0	0	0	0	0	0
877	PFR_JS13-1_864	Succinate dehydrogenase cytochrome B-558 subunit	986930	987691	+	PROKKA_00874	hypothetical protein	986930	987691	+					1	0	0	0	0	0	0
878	PFR_JS13-1_865	Succinate dehydrogenase flavoprotein subunit	987688	989709	+	PROKKA_00875	Fumarate reductase flavoprotein subunit	987688	989709	+	1.3.5.4	frdA_1	similar to AA sequence:UniProtKB:P00363		1	0	0	0	0	0	0
879	PFR_JS13-1_866	Succinate dehydrogenase/fumarate reductase	989706	990470	+	PROKKA_00876	Fumarate reductase iron-sulfur subunit	989706	990470	+	1.3.99.1	frdB_1	similar to AA sequence:UniProtKB:P0AC47		1	0	0	0	0	0	0
880	PFR_JS13-1_867	50S ribosomal protein L19	990744	991100	+	PROKKA_00877	50S ribosomal protein L19	990744	991100	+		rplS	similar to AA sequence:UniProtKB:P66083		1	0	0	0	0	0	0
881	PFR_JS13-1_868	Signal peptidase I	991112	991936	+	PROKKA_00878	Signal peptidase I	991112	991936	+	3.4.21.89	lepB	similar to AA sequence:UniProtKB:Q10789		1	0	0	0	0	0	0
882	PFR_JS13-1_869	Ribonuclease HII	991942	992577	+	PROKKA_00879	Ribonuclease HII	991942	992577	+	3.1.26.4	rnhB	similar to AA sequence:UniProtKB:P10442		1	0	0	0	0	0	0
883	PFR_JS13-1_870	Protein often found in Actinomycetes clustered	992574	992888	+	PROKKA_00880	hypothetical protein	992574	992888	+					1	0	0	0	0	0	0
884	PFR_JS13-1_871	UPF0102 protein	993042	993404	+	PROKKA_00881	hypothetical protein	993042	993404	+			protein motif:CLUSTERS:PRK12497		1	0	0	0	0	0	0
885	PFR_JS13-1_872	Mg-chelatase subunit D/I family protein, ComM	993401	994939	+	PROKKA_00882	Competence protein ComM	993401	994939	+		comM	similar to AA sequence:UniProtKB:P45049		1	0	0	0	0	0	0
886	PFR_JS13-1_873	DNA protecting protein DprA	994936	996096	+	PROKKA_00883	hypothetical protein	994936	996096	+			protein motif:CLUSTERS:PRK10736		1	0	0	0	0	0	0
887	PFR_JS13-1_874	Tryptophan synthase beta chain 2	996258	997580	+	PROKKA_00884	Tryptophan synthase beta chain	996258	997580	+	4.2.1.20	trpB_1	similar to AA sequence:UniProtKB:Q81TL8		1	0	0	0	0	0	0
888	PFR_JS13-1_875	Hypothetical protein	997583	997969	+	PROKKA_00885	Dinitrogenase iron-molybdenum cofactor	997583	997969	+			protein motif:Pfam:PF02579.11		1	0	0	0	0	0	0
889	PFR_JS13-1_876	Undecaprenyl-diphosphatase UppP	998040	998876	-	PROKKA_00886	Undecaprenyl-diphosphatase	998040	998876	-	3.6.1.27	uppP_2	similar to AA sequence:UniProtKB:P60932		1	0	0	0	0	0	0
890	PFR_JS13-1_877	Uma4 protein	999752	1001059	-	PROKKA_00887	Transposase	999752	1001059	-			protein motif:Pfam:PF01610.11		0	0	0	0	0	0	0
891	PFR_JS13-1_878	Hypothetical protein	1001141	1001323	-	PROKKA_00888	hypothetical protein	1001141	1001323	-					0	0	0	0	0	0	0
892	PFR_JS13-1_879	Hypothetical protein	1001370	1001693	-	PROKKA_00889	hypothetical protein	1001370	1001693	-					0	0	0	0	0	0	0
893						PROKKA_00890	tRNA-Leu(gag)	1002295	1002383	-			COORDINATES:profile:Aragorn:1.2		0					0	0
894	PFR_JS13-1_880	Hypothetical protein	1002598	1002849	+	PROKKA_00891	hypothetical protein	1002598	1002849	+					1	0	0	0	0	0	0
895	PFR_JS13-1_881	Aldo/keto reductase family oxidoreductase	1002867	1003856	-	PROKKA_00892	General stress protein 69	1002867	1003856	-	1.1.1.-	yhdN	similar to AA sequence:UniProtKB:P80874		1	0	0	0	0	0	0
896	PFR_JS13-1_882	Cysteine--tRNA ligase 3	1003923	1005179	+	PROKKA_00893	L-cysteine:1D-myo-inositol 2-amino-2-deoxy-alpha-D-glucopyranoside ligase	1003923	1005179	+	6.3.1.13	mshC	similar to AA sequence:UniProtKB:A0QZY0		1	0	0	0	0	0	0
897	PFR_JS13-1_883	ATP-dependent zinc metalloprotease FtsH	1005289	1007439	-	PROKKA_00894	ATP-dependent zinc metalloprotease FtsH	1005289	1007439	-	3.4.24.-	ftsH	similar to AA sequence:UniProtKB:P0AAI3		1	0	0	0	0	0	0
898	PFR_JS13-1_884	Phosphoribosyl-AMP pyrophosphatase hisE	1007612	1007878	+	PROKKA_00895	Phosphoribosyl-ATP pyrophosphatase	1007612	1007878	+	3.6.1.31	hisE	similar to AA sequence:UniProtKB:P0A5B1		1	0	0	0	0	0	0
899	PFR_JS13-1_885	ATP phosphoribosyltransferase	1007945	1008808	+	PROKKA_00896	ATP phosphoribosyltransferase	1007945	1008808	+	2.4.2.17	hisG	similar to AA sequence:UniProtKB:P60759		1	0	0	0	0	0	0
900	PFR_JS13-1_886	Hypothetical protein	1008872	1009354	-	PROKKA_00897	hypothetical protein	1008872	1009354	-					1	0	0	0	0	0	0
901	PFR_JS13-1_887	Translation initiation factor IF-3	1009660	1010388	+	PROKKA_00898	Translation initiation factor IF-3	1009660	1010388	+		infC	similar to AA sequence:UniProtKB:Q5SKU2		1	0	0	0	0	0	0
902	PFR_JS13-1_888	50S ribosomal protein L35	1010456	1010650	+	PROKKA_00899	50S ribosomal protein L35	1010456	1010650	+		rpmI	similar to AA sequence:UniProtKB:P80341		1	0	0	0	0	0	0
903	PFR_JS13-1_889	50S ribosomal protein L20	1010696	1011067	+	PROKKA_00900	50S ribosomal protein L20	1010696	1011067	+		rplT	similar to AA sequence:UniProtKB:A0QYU6		1	0	0	0	0	0	0
904	PFR_JS13-1_890	RNA 2'-O ribose methyltransferase substrate	1011078	1011938	+	PROKKA_00901	23S rRNA (uridine(2479)-2'-O)-methyltransferase	1011078	1011938	+	2.1.1.208	aviRb	similar to AA sequence:UniProtKB:Q9F5K6		1	0	0	0	0	0	0
905	PFR_JS13-1_891	Hypothetical protein	1011938	1012114	+	PROKKA_00902	hypothetical protein	1011938	1012114	+					1	0	0	0	0	0	0
906	PFR_JS13-1_892	Phenylalanine--tRNA ligase alpha subunit	1012270	1013364	+	PROKKA_00903	Phenylalanine--tRNA ligase alpha subunit	1012270	1013364	+	6.1.1.20	pheS	similar to AA sequence:UniProtKB:Q8NQN7		1	0	0	0	0	0	0
907	PFR_JS13-1_893	Phenylalanine--tRNA ligase beta subunit	1013361	1015889	+	PROKKA_00904	Phenylalanine--tRNA ligase beta subunit	1013361	1015889	+	6.1.1.20	pheT	similar to AA sequence:UniProtKB:P67041		1	0	0	0	0	0	0
908	PFR_JS13-1_894	Aminotransferase AlaT	1016017	1017231	-	PROKKA_00905	Glutamate-pyruvate aminotransferase AlaA	1016017	1017231	-	2.6.1.2	alaA	similar to AA sequence:UniProtKB:P0A959		1	0	0	0	0	0	0
909	PFR_JS13-1_895	N-acetyl-gamma-glutamyl-phosphate reductase ArgC	1017396	1018427	+	PROKKA_00906	N-acetyl-gamma-glutamyl-phosphate reductase	1017396	1018427	+	1.2.1.38	argC	similar to AA sequence:UniProtKB:P63562		1	0	0	0	0	0	0
910	PFR_JS13-1_896	Arginine biosynthesis bifunctional protein ArgJ	1018424	1019575	+	PROKKA_00907	Arginine biosynthesis bifunctional protein ArgJ	1018424	1019575	+		argJ	similar to AA sequence:UniProtKB:Q8CK24		1	0	0	0	0	0	0
911	PFR_JS13-1_897	Acetylglutamate kinase	1019572	1020483	+	PROKKA_00908	Acetylglutamate kinase	1019572	1020483	+	2.7.2.8	argB	similar to AA sequence:UniProtKB:A0QYT0		1	0	0	0	0	0	0
912	PFR_JS13-1_898	Acetylornithine transaminase	1020476	1021699	+	PROKKA_00909	Acetylornithine aminotransferase	1020476	1021699	+	2.6.1.11	argD	similar to AA sequence:UniProtKB:A0QYS9		0	0	0	0	0	0	0
913	PFR_JS13-1_899	Arginine repressor	1021696	1022250	+	PROKKA_00910	Arginine repressor	1021696	1022250	+		argR	similar to AA sequence:UniProtKB:P0A4Y8		1	0	0	0	0	0	0
914	PFR_JS13-1_900	Argininosuccinate lyase	1022254	1023675	+	PROKKA_00911	Argininosuccinate lyase	1022254	1023675	+	4.3.2.1	argH	similar to AA sequence:UniProtKB:A0QYS5		1	0	0	0	0	0	0
915	PFR_JS13-1_901	Tyrosyl-tRNA synthase tyrS	1023803	1025071	+	PROKKA_00912	Tyrosine--tRNA ligase	1023803	1025071	+	6.1.1.1	tyrS	similar to AA sequence:UniProtKB:P67611		1	0	0	0	0	0	0
916	PFR_JS13-1_902	Hypothetical protein	1027024	1028019	-	PROKKA_00913	hypothetical protein	1027024	1028019	-					0	1	1	0	0	0	0
917	PFR_JS13-1_903	Hypothetical protein	1030823	1032010	+	PROKKA_00914	hypothetical protein	1030823	1032010	+					0	1	1	0	0	0	0
918	PFR_JS13-1_904	Hypothetical protein	1032085	1033110	+	PROKKA_00915	hypothetical protein	1032085	1033110	+					0	0	0	0	0	0	0
919	PFR_JS13-1_905	HAD-superfamily hydrolase, subfamily IIA	1033107	1034138	+	PROKKA_00916	putative hydrolase YutF	1033107	1034138	+	3.-.-.-	yutF	similar to AA sequence:UniProtKB:O32125		1	0	0	0	0	0	0
920	PFR_JS13-1_906	BioY family protein	1034327	1034956	+	PROKKA_00917	Biotin transporter BioY	1034327	1034956	+		bioY	similar to AA sequence:UniProtKB:Q2KBP7		1	0	0	0	0	0	0
921	PFR_JS13-1_907	Biotin ABC transport system ATP-binding protein	1034970	1035698	+	PROKKA_00918	Biotin transport ATP-binding protein BioM	1034970	1035698	+	3.6.3.-	bioM	similar to AA sequence:UniProtKB:Q2KBP5		1	0	0	0	0	0	0
922	PFR_JS13-1_908	Cobalt transport protein	1035695	1036303	+	PROKKA_00919	Energy-coupling factor transporter transmembrane protein BioN	1035695	1036303	+		bioN	similar to AA sequence:UniProtKB:Q2KBP6		1	0	0	0	0	0	0
923	PFR_JS13-1_909	Hypothetical protein	1036376	1036615	+	PROKKA_00920	hypothetical protein	1036376	1036615	+					1	0	0	0	0	0	0
924	PFR_JS13-1_910	Probable inorganic polyphosphate/ATP-NAD kinase	1036680	1037603	+	PROKKA_00921	Inorganic polyphosphate/ATP-NAD kinase	1036680	1037603	+	2.7.1.23	ppnK	similar to AA sequence:UniProtKB:P0A5S6		1	0	0	0	0	0	0
925	PFR_JS13-1_911	DNA repair protein RecN	1037597	1039288	+	PROKKA_00922	DNA repair protein RecN	1037597	1039288	+		recN	similar to AA sequence:UniProtKB:Q9WXF2		1	0	0	0	0	0	0
926	PFR_JS13-1_912	CTP synthase	1039375	1041129	+	PROKKA_00923	CTP synthase	1039375	1041129	+	6.3.4.2	pyrG	similar to AA sequence:UniProtKB:A0QYQ7		1	0	0	0	0	0	0
927	PFR_JS13-1_913	Hydrolase, NUDIX family	1041122	1041784	+	PROKKA_00924	ADP-ribose pyrophosphatase	1041122	1041784	+	3.6.1.13	nudF	similar to AA sequence:UniProtKB:P54570		1	0	0	0	0	0	0
928	PFR_JS13-1_914	Tyrosine recombinase XerC 2	1041777	1042772	+	PROKKA_00925	Tyrosine recombinase XerD	1041777	1042772	+		xerD	similar to AA sequence:UniProtKB:P0A0P0		1	0	0	0	0	0	0
929	PFR_JS13-1_915	Sporulation initiation inhibitor protein Soj	1042893	1043789	+	PROKKA_00926	Sporulation initiation inhibitor protein Soj	1042893	1043789	+	3.6.-.-	soj_1	similar to AA sequence:UniProtKB:P37522		1	0	0	0	0	0	0
930	PFR_JS13-1_916	Hypothetical protein	1043774	1044049	+	PROKKA_00927	hypothetical protein	1043774	1044049	+					1	0	0	0	0	0	0
931	PFR_JS13-1_917	Condensin subunit ScpA	1044030	1044944	+	PROKKA_00928	Segregation and condensation protein A	1044030	1044944	+		scpA	similar to AA sequence:UniProtKB:P35154		1	0	0	0	0	0	0
932	PFR_JS13-1_918	Transcriptional regulator	1044941	1045696	+	PROKKA_00929	Segregation and condensation protein B	1044941	1045696	+		scpB	similar to AA sequence:UniProtKB:C1CMI5		1	0	0	0	0	0	0
933	PFR_JS13-1_919	Pseudouridylate synthase	1045689	1046471	+	PROKKA_00930	Ribosomal large subunit pseudouridine synthase B	1045689	1046471	+	5.4.99.22	rluB	similar to AA sequence:UniProtKB:P35159		1	0	0	0	0	0	0
934	PFR_JS13-1_920	FKBP-type peptidylprolyl isomerase	1046768	1047178	+	PROKKA_00931	FK506-binding protein	1046768	1047178	+	5.2.1.8	fkbP_1	similar to AA sequence:UniProtKB:P28725		1	0	0	0	0	0	0
935	PFR_JS13-1_921	Peptidylprolyl isomerase	1047264	1048322	+	PROKKA_00932	FK506-binding protein	1047264	1048322	+	5.2.1.8	fkbP_2	similar to AA sequence:UniProtKB:P28725		1	0	0	0	0	0	0
936	PFR_JS13-1_922	TRNA synthetase class I, catalytic domain	1048465	1049424	-	PROKKA_00933	Glutamyl-Q tRNA(Asp) synthetase	1048465	1049424	-	6.1.1.-	gluQ	similar to AA sequence:UniProtKB:P27305		1	0	0	0	0	0	0
937	PFR_JS13-1_923	Protein pafB	1049493	1050461	+	PROKKA_00934	hypothetical protein	1049493	1050461	+					1	0	0	0	0	0	0
938	PFR_JS13-1_924	Protein pafC	1050448	1051407	+	PROKKA_00935	hypothetical protein	1050448	1051407	+					1	0	0	0	0	0	0
939	PFR_JS13-1_925	Sec-independent protein translocase protein TatA	1051509	1051817	+	PROKKA_00936	Sec-independent protein translocase protein TatAy	1051509	1051817	+		tatAy	similar to AA sequence:UniProtKB:O05522		1	0	0	0	0	0	0
940	PFR_JS13-1_926	Twin arginine-targeting protein translocase TatC	1051836	1052708	+	PROKKA_00937	Sec-independent protein translocase protein TatC	1051836	1052708	+		tatC	similar to AA sequence:UniProtKB:O67305		1	0	0	0	0	0	0
941	PFR_JS13-1_927	Hypothetical protein	1053445	1053726	+	PROKKA_00938	Diacylglycerol kinase	1053445	1053726	+	2.7.1.107	dagK_2	similar to AA sequence:UniProtKB:O53526		1	0	0	0	0	0	0
942	PFR_JS13-1_928	Cof protein:HAD-superfamily hydrolase	1053767	1054732	-	PROKKA_00939	Sugar phosphatase YidA	1053767	1054732	-	3.1.3.23	yidA	similar to AA sequence:UniProtKB:P0A8Y5		1	0	0	0	0	0	0
943	PFR_JS13-1_929	DSH domain protein	1054759	1057560	+	PROKKA_00940	ski2-like helicase	1054759	1057560	+			protein motif:CLUSTERS:PRK02362		1	0	0	0	0	0	0
944	PFR_JS13-1_930	Antibiotic biosynthesis monooxygenase	1057572	1057949	+	PROKKA_00941	Putative monooxygenase YcnE	1057572	1057949	+	1.-.-.-	ycnE	similar to AA sequence:UniProtKB:P94425		1	0	0	0	0	0	0
945	PFR_JS13-1_931	Potassium channel beta chain	1058064	1059080	-	PROKKA_00942	L-glyceraldehyde 3-phosphate reductase	1058064	1059080	-	1.1.1.-	gpr_1	similar to AA sequence:UniProtKB:Q46851		1	0	0	0	0	0	0
946	PFR_JS13-1_932	Imidazole glycerol phosphate synthase subunit	1059165	1059929	+	PROKKA_00943	Imidazole glycerol phosphate synthase subunit HisF	1059165	1059929	+	4.1.3.-	hisF	similar to AA sequence:UniProtKB:O31139		1	0	0	0	0	0	0
947	PFR_JS13-1_933	Hypothetical protein	1060033	1061139	+	PROKKA_00944	hypothetical protein	1060033	1061139	+					1	0	0	0	0	0	0
948	PFR_JS13-1_934	Acetolactate synthase	1061438	1063198	+	PROKKA_00945	Acetolactate synthase large subunit	1061438	1063198	+	2.2.1.6	ilvB	similar to AA sequence:UniProtKB:P42463		1	0	0	0	0	0	0
949	PFR_JS13-1_935	Acetolactate synthase, small subunit	1063195	1063722	+	PROKKA_00946	Putative acetolactate synthase small subunit	1063195	1063722	+	2.2.1.6	ilvH	similar to AA sequence:UniProtKB:P65161		1	0	0	0	0	0	0
950	PFR_JS13-1_936	Ketol-acid reductoisomerase 2	1063767	1064798	+	PROKKA_00947	Ketol-acid reductoisomerase	1063767	1064798	+	1.1.1.86	ilvC	similar to AA sequence:UniProtKB:A0QUX8		1	0	0	0	0	0	0
951	PFR_JS13-1_937	Hypothetical protein	1064960	1065820	-	PROKKA_00948	hypothetical protein	1064960	1065820	-					1	0	0	0	0	0	0
952	PFR_JS13-1_938	Hypothetical protein	1065802	1066389	-	PROKKA_00949	hypothetical protein	1065802	1066389	-					0	0	0	0	0	0	0
953	PFR_JS13-1_939	Hypothetical protein	1066468	1066641	-	PROKKA_00950	hypothetical protein	1066468	1066641	-					0	0	0	0	0	0	0
954	PFR_JS13-1_940	Tartrate dehydrogenase	1066675	1067739	-	PROKKA_00951	3-isopropylmalate dehydrogenase	1066675	1067739	-	1.1.1.85	leuB	similar to AA sequence:UniProtKB:P95313		1	0	0	0	0	0	0
955	PFR_JS13-1_941	Branched-chain-amino-acid transaminase	1067905	1068990	+	PROKKA_00952	Branched-chain-amino-acid aminotransferase	1067905	1068990	+	2.6.1.42	ilvE_1	similar to AA sequence:UniProtKB:A0R066		1	0	0	0	0	0	0
956	PFR_JS13-1_942	Putative alpha-isopropylmalate/homocitrate	1069022	1070620	+	PROKKA_00953	2-isopropylmalate synthase	1069022	1070620	+	2.3.3.13	leuA_1	similar to AA sequence:UniProtKB:P09151		1	0	0	0	0	0	0
957	PFR_JS13-1_943	FAH family protein	1070680	1071525	+	PROKKA_00954	Ureidoglycolate lyase	1070680	1071525	+	4.3.2.3		similar to AA sequence:UniProtKB:Q39BA7		1	0	0	0	0	0	0
958	PFR_JS13-1_944	CAAX amino terminal protease family protein	1071533	1072627	+	PROKKA_00955	CAAX amino terminal protease self- immunity	1071533	1072627	+			protein motif:Pfam:PF02517.10		1	0	0	0	0	0	0
959						PROKKA_00956	tRNA-Gln(ctg)	1072692	1072764	+			COORDINATES:profile:Aragorn:1.2		0					0	0
960						PROKKA_00957	tRNA-Glu(ctc)	1072857	1072930	+			COORDINATES:profile:Aragorn:1.2		0					0	0
961	PFR_JS13-1_945	Transcriptional regulator, IclR family protein	1073029	1073757	-	PROKKA_00958	HTH-type transcriptional regulator KipR	1073029	1073757	-		kipR	similar to AA sequence:UniProtKB:P42968		1	0	0	0	0	0	0
962	PFR_JS13-1_946	3-isopropylmalate dehydratase large subunit	1073801	1075210	+	PROKKA_00959	3-isopropylmalate dehydratase large subunit	1073801	1075210	+	4.2.1.33	leuC	similar to AA sequence:UniProtKB:Q7TXH6		1	0	0	0	0	0	0
963	PFR_JS13-1_947	3-isopropylmalate dehydratase small subunit	1075224	1075820	+	PROKKA_00960	3-isopropylmalate dehydratase small subunit	1075224	1075820	+	4.2.1.33	leuD	similar to AA sequence:UniProtKB:Q8NQV7		1	0	0	0	0	0	0
964	PFR_JS13-1_948	1-acylglycerol-3-phosphate O-acyltransferase,	1075951	1076754	+	PROKKA_00961	2-acyl-glycerophospho-ethanolamine acyltransferase	1075951	1076754	+			protein motif:CLUSTERS:PRK08633		1	0	0	0	0	0	0
965	PFR_JS13-1_949	D-alanine-D-alanine ligase A	1076828	1077955	+	PROKKA_00962	D-alanine--D-alanine ligase	1076828	1077955	+	6.3.2.4	ddl	similar to AA sequence:UniProtKB:P95114		1	0	0	0	0	0	0
966	PFR_JS13-1_950	Conserved hypothetical membrane spanning protein	1077994	1078989	-	PROKKA_00963	hypothetical protein	1077994	1078989	-					1	0	0	0	0	0	0
967	PFR_JS13-1_951	Putative dihydroxyacetone kinase regulator	1079099	1079833	+	PROKKA_00964	hypothetical protein	1079099	1079833	+					1	0	0	0	0	0	0
968	PFR_JS13-1_952	Thiamine monophosphate kinase	1079844	1080827	+	PROKKA_00965	Thiamine-monophosphate kinase	1079844	1080827	+	2.7.4.16	thiL	similar to AA sequence:UniProtKB:O67883		1	0	0	0	0	0	0
969	PFR_JS13-1_953	FtsK	1081061	1083382	+	PROKKA_00966	DNA translocase SpoIIIE	1081061	1083382	+		spoIIIE	similar to AA sequence:UniProtKB:P21458		1	0	0	0	0	0	0
970	PFR_JS13-1_954	Ribosomal protein S12 methylthiotransferase RimO	1083462	1084895	+	PROKKA_00967	Ribosomal protein S12 methylthiotransferase RimO	1083462	1084895	+	2.-.-.-	rimO	similar to AA sequence:UniProtKB:Q9X2H6		1	0	0	0	0	0	0
971	PFR_JS13-1_955	Phosphatidylglycerophosphate synthase pgsA3	1084900	1085553	+	PROKKA_00968	Putative CDP-diacylglycerol--glycerol-3-phosphate 3-phosphatidyl-transferase 2	1084900	1085553	+	2.7.8.5	pgsA2_1	similar to AA sequence:UniProtKB:O33288		1	0	0	0	0	0	0
972	PFR_JS13-1_956	CinA domain protein	1085546	1086049	+	PROKKA_00969	Nicotinamide-nucleotide amidohydrolase PncC	1085546	1086049	+	3.5.1.42	pncC	similar to AA sequence:UniProtKB:P0A6G3		1	0	0	0	0	0	0
973	PFR_JS13-1_957	Transcriptional regulator	1086217	1086522	+	PROKKA_00970	Transcriptional regulator ClgR	1086217	1086522	+		clgR	similar to AA sequence:UniProtKB:A0QVU1		1	0	0	0	0	0	0
974	PFR_JS13-1_958	Putative ATP-DEPENDENT HELICASE LHR	1086744	1091423	-	PROKKA_00971	putative ATP-dependent helicase Lhr	1086744	1091423	-			protein motif:CLUSTERS:PRK09751		1	0	0	0	0	0	0
975	PFR_JS13-1_959	Hypothetical protein	1091527	1091694	-	PROKKA_00972	hypothetical protein	1091527	1091694	-					1	0	0	0	0	0	0
976	PFR_JS13-1_960	Protein RecA 2	1092003	1093121	+	PROKKA_00973	recombinase A	1092003	1093121	+			protein motif:CLUSTERS:PRK09354		1	0	0	0	0	0	0
977	PFR_JS13-1_961	Regulatory protein RecX	1093124	1093738	+	PROKKA_00974	Regulatory protein RecX	1093124	1093738	+		recX	similar to AA sequence:UniProtKB:P0A5U8		1	0	0	0	0	0	0
978	PFR_JS13-1_962	Ribonuclease Y	1093900	1095435	+	PROKKA_00975	Ribonuclease Y	1093900	1095435	+	3.1.-.-	rny	similar to AA sequence:UniProtKB:P67278		1	0	0	0	0	0	0
979	PFR_JS13-1_963	Glutamate uptake system ATP-binding protein	1095445	1096260	-	PROKKA_00976	Glutamine transport ATP-binding protein GlnQ	1095445	1096260	-		glnQ_4	similar to AA sequence:UniProtKB:P27675		1	0	0	0	0	0	0
980	PFR_JS13-1_964	(Dimethylallyl)adenosine tRNA	1096364	1097878	+	PROKKA_00977	(Dimethylallyl)adenosine tRNA methylthiotransferase MiaB	1096364	1097878	+	2.-.-.-	miaB	similar to AA sequence:UniProtKB:O31778		1	0	0	0	0	0	0
981	PFR_JS13-1_965	TRNA dimethylallyltransferase	1097875	1098861	+	PROKKA_00978	tRNA dimethylallyltransferase	1097875	1098861	+	2.5.1.75	miaA	similar to AA sequence:UniProtKB:Q9KAC3		1	0	0	0	0	0	0
982	PFR_JS13-1_966	Diaminopimelate epimerase	1098876	1099718	+	PROKKA_00979	Diaminopimelate epimerase	1098876	1099718	+	5.1.1.7	dapF	similar to AA sequence:UniProtKB:A4QEV1		1	0	0	0	0	0	0
983	PFR_JS13-1_967	GTPase HflX	1099762	1101198	+	PROKKA_00980	GTPase HflX	1099762	1101198	+		hflX	similar to AA sequence:UniProtKB:P25519		1	0	0	0	0	0	0
984	PFR_JS13-1_968	ATP-dependent helicase DinG	1101365	1103428	+	PROKKA_00981	putative ATP-dependent helicase DinG	1101365	1103428	+	3.6.4.12	dinG	similar to AA sequence:UniProtKB:P27296		1	0	0	0	0	0	0
985	PFR_JS13-1_969	LexA repressor	1103432	1104274	-	PROKKA_00982	LexA repressor	1103432	1104274	-	3.4.21.88	lexA	similar to AA sequence:UniProtKB:Q50765		1	0	0	0	0	0	0
986	PFR_JS13-1_970	Hypothetical protein	1104544	1105374	+	PROKKA_00983	hypothetical protein	1104544	1105374	+					1	0	0	0	0	0	0
987	PFR_JS13-1_971	Transcriptional repressor NrdR	1105709	1106206	+	PROKKA_00984	Transcriptional repressor NrdR	1105709	1106206	+		nrdR	similar to AA sequence:UniProtKB:O69980		1	0	0	0	0	0	0
988	PFR_JS13-1_972	Vitamin B12-dependent ribonucleotide reductase	1106392	1109283	+	PROKKA_00985	Vitamin B12-dependent ribonucleotide reductase	1106392	1109283	+	1.17.4.1	nrdJ	similar to AA sequence:UniProtKB:O69981		1	0	0	0	0	0	0
989	PFR_JS13-1_973	Phospholipase, patatin family	1109392	1110333	-	PROKKA_00986	NTE family protein RssA	1109392	1110333	-		rssA	similar to AA sequence:UniProtKB:P0AFR0		1	0	0	0	0	0	0
990	PFR_JS13-1_974	Glycerol-3-phosphate dehydrogenase [NAD(P) ] A	1110525	1112153	+	PROKKA_00987	Anaerobic glycerol-3-phosphate dehydrogenase subunit A	1110525	1112153	+	1.1.5.3	glpA	similar to AA sequence:UniProtKB:P0A9C0		1	0	0	0	0	0	0
991	PFR_JS13-1_975	Glycerol-3-phosphate dehydrogenase [NAD(P) ] B	1112150	1113460	+	PROKKA_00988	Anaerobic glycerol-3-phosphate dehydrogenase subunit B	1112150	1113460	+	1.1.5.3	glpB	similar to AA sequence:UniProtKB:P13033		1	0	0	0	0	0	0
992	PFR_JS13-1_976	Anaerobic glycerol-3-phosphate dehydrogenase	1113457	1114848	+	PROKKA_00989	Anaerobic glycerol-3-phosphate dehydrogenase subunit C	1113457	1114848	+		glpC	similar to AA sequence:UniProtKB:P0A996		1	0	0	0	0	0	0
993	PFR_JS13-1_977	Sugar-binding family transcriptional regulator	1114931	1115899	-	PROKKA_00990	Deoxyribonucleoside regulator	1114931	1115899	-		deoR_2	similar to AA sequence:UniProtKB:P39140		1	0	0	0	0	0	0
994	PFR_JS13-1_978	Putative AEC family transporter	1116109	1117044	+	PROKKA_00991	Membrane transport protein	1116109	1117044	+			protein motif:Pfam:PF03547.12		1	0	0	0	0	0	0
995	PFR_JS13-1_979	Probable phosphoketolase	1117137	1119734	+	PROKKA_00992	Xylulose-5-phosphate phosphoketolase	1117137	1119734	+	4.1.2.9	xpkA	similar to AA sequence:UniProtKB:Q937F6		1	0	0	0	0	0	0
996	PFR_JS13-1_980	ATP-dependent helicase HrpA	1119872	1123840	+	PROKKA_00993	ATP-dependent RNA helicase HrpB	1119872	1123840	+	3.6.4.13	hrpB_1	similar to AA sequence:UniProtKB:P37024		0	0	0	0	0	0	0
997	PFR_JS13-1_981	Putative acyl-CoA thioesterase II	1123948	1124823	+	PROKKA_00994	Acyl-CoA thioesterase 2	1123948	1124823	+	3.1.2.-	tesB	similar to AA sequence:UniProtKB:P0AGG2		1	0	0	0	0	0	0
998	PFR_JS13-1_982	Solute binding protein of ABC transporter system	1124836	1125729	-	PROKKA_00995	putative arabinose-binding protein precursor	1124836	1125729	-		araN	similar to AA sequence:UniProtKB:P94528		0	0	0	0	0	0	0
999	PFR_JS13-1_983	ABC transporter	1125698	1126177	-	PROKKA_00996	Bacterial extracellular solute-binding protein	1125698	1126177	-			protein motif:Pfam:PF01547.19		0	0	0	0	0	0	0
1000	PFR_JS13-1_984	Transcriptional regulator	1126646	1127449	+	PROKKA_00997	HTH-type transcriptional repressor CytR	1126646	1127449	+		cytR	similar to AA sequence:UniProtKB:P0ACN7		1	0	0	0	0	0	0
1001	PFR_JS13-1_985	RNA polymerase sigma factor SigB	1127552	1128481	-	PROKKA_00998	RNA polymerase sigma factor SigB	1127552	1128481	-		sigB	similar to AA sequence:UniProtKB:Q59563		1	0	0	0	0	0	0
1002	PFR_JS13-1_986	RNA polymerase sigma factor	1128840	1130369	+	PROKKA_00999	RNA polymerase principal sigma factor HrdB	1128840	1130369	+		hrdB	similar to AA sequence:UniProtKB:P18183		1	0	0	0	0	0	0
1003	PFR_JS13-1_987	L-lactate dehydrogenase 1 (Precursor)	1130457	1131422	-	PROKKA_01000	L-lactate dehydrogenase 2	1130457	1131422	-	1.1.1.27	ldh2	similar to AA sequence:UniProtKB:P0CW93		1	0	0	0	0	0	0
1004	PFR_JS13-1_988	Hypothetical protein	1131568	1131759	-	PROKKA_01001	hypothetical protein	1131568	1131759	-					1	0	0	0	0	0	0
1005	PFR_JS13-1_989	DNA gyrase, B subunit	1131922	1134042	+	PROKKA_01002	DNA topoisomerase 4 subunit B	1131922	1134042	+	5.99.1.3	parE	similar to AA sequence:UniProtKB:P66939		1	0	0	0	0	0	0
1006	PFR_JS13-1_990	2-dehydropantoate 2-reductase (Ketopantoate	1134067	1134984	-	PROKKA_01003	2-dehydropantoate 2-reductase	1134067	1134984	-			protein motif:CLUSTERS:PRK06522		1	0	0	0	0	0	0
1007	PFR_JS13-1_991	DNA gyrase/topoisomerase IV, A subunit	1135090	1137552	-	PROKKA_01004	DNA gyrase subunit A	1135090	1137552	-	5.99.1.3	gyrA_2	similar to AA sequence:UniProtKB:Q2G2Q0		1	0	0	0	0	0	0
1008	PFR_JS13-1_992	PF09949 family protein	1137678	1138763	-	PROKKA_01005	hypothetical protein	1137678	1138763	-					1	0	0	0	0	0	0
1009	PFR_JS13-1_993	Phosphodiesterase I	1138819	1139412	+	PROKKA_01006	hypothetical protein	1138819	1139412	+					1	0	0	0	0	0	0
1010	PFR_JS13-1_994	Type I phosphodiesterase / nucleotide	1139416	1140567	+	PROKKA_01007	Type I phosphodiesterase / nucleotide pyrophosphatase	1139416	1140567	+			protein motif:Pfam:PF01663.16		1	0	0	0	0	0	0
1011	PFR_JS13-1_995	Hypothetical protein	1140670	1141998	-	PROKKA_01008	hypothetical protein	1140670	1141998	-					1	0	0	0	0	0	0
1012	PFR_JS13-1_996	PF13834 domain protein	1142214	1142588	+	PROKKA_01009	hypothetical protein	1142214	1142588	+					1	0	0	0	0	0	0
1013	PFR_JS13-1_997	Hypothetical protein	1142700	1143020	-	PROKKA_01010	hypothetical protein	1142700	1143020	-					1	0	0	0	0	0	0
1014	PFR_JS13-1_998	PF12502 family protein	1143310	1144131	+	PROKKA_01011	hypothetical protein	1143310	1144131	+					1	0	0	0	0	0	0
1015	PFR_JS13-1_999	Nucleic acid-binding domain protein	1144128	1144508	+	PROKKA_01012	hypothetical protein	1144128	1144508	+					1	0	0	0	0	0	0
1016	PFR_JS13-1_1000	TrkB	1144515	1145183	-	PROKKA_01013	Trk system potassium uptake protein TrkA	1144515	1145183	-		trkA_1	similar to AA sequence:UniProtKB:P0AGI8		1	0	0	0	0	0	0
1017	PFR_JS13-1_1001	Trk system potassium uptake protein TrkA	1145197	1145859	-	PROKKA_01014	Trk system potassium uptake protein TrkA	1145197	1145859	-		trkA_2	similar to AA sequence:UniProtKB:P0AGI8		1	0	0	0	0	0	0
1018	PFR_JS13-1_1002	Conserved alanine, valine and leucine rich	1146032	1148026	+	PROKKA_01015	hypothetical protein	1146032	1148026	+					1	0	0	0	0	0	0
1019	PFR_JS13-1_1003	Putative 23S rRNA (Uracil-5-)-methyltransferase	1148023	1149201	+	PROKKA_01016	putative RNA methyltransferase/cg2084	1148023	1149201	+	2.1.1.-		similar to AA sequence:UniProtKB:Q6M4B7		1	0	0	0	0	0	0
1020	PFR_JS13-1_1004	Hypothetical protein	1149198	1149458	+	PROKKA_01017	hypothetical protein	1149198	1149458	+					1	0	0	0	0	0	0
1021	PFR_JS13-1_1005	Glutathione S-transferase domain protein	1149493	1150566	-	PROKKA_01018	Glutathionyl-hydroquinone reductase YqjG	1149493	1150566	-	1.8.-.-	yqjG_1	similar to AA sequence:UniProtKB:P42620		1	0	0	0	0	0	0
1022	PFR_JS13-1_1006	GCN5 N-acetyltransferase	1150563	1151213	-	PROKKA_01019	putative acetyltransferase	1150563	1151213	-			protein motif:CLUSTERS:PRK03624		1	0	0	0	0	0	0
1023	PFR_JS13-1_1007	Cysteine synthase	1151210	1152043	-	PROKKA_01020	O-acetylserine sulfhydrylase	1151210	1152043	-	2.5.1.47	cysK1_1	similar to AA sequence:UniProtKB:P0A534		0	0	0	0	0	0	0
1024	PFR_JS13-1_1008	Hypothetical protein	1152065	1152184	-	PROKKA_01021	hypothetical protein	1152065	1152184	-					0	0	0	0	0	0	0
1025	PFR_JS13-1_1009	Glutathione S-transferase domain protein	1152676	1153704	+	PROKKA_01022	Glutathionyl-hydroquinone reductase YqjG	1152676	1153704	+	1.8.-.-	yqjG_2	similar to AA sequence:UniProtKB:P42620		0	0	0	0	0	0	0
1026	PFR_JS13-1_1010	Alpha-ketoglutarate transporter, MFS super	1153812	1155242	+	PROKKA_01023	Alpha-ketoglutarate permease	1153812	1155242	+		kgtP_2	similar to AA sequence:UniProtKB:P0AEX3		1	0	0	0	0	0	0
1027	PFR_JS13-1_1011	Aconitate hydratase 1	1155496	1158168	+	PROKKA_01024	Aconitate hydratase	1155496	1158168	+	4.2.1.3	acnA	similar to AA sequence:UniProtKB:A0QX20		1	0	0	0	0	0	0
1028	PFR_JS13-1_1012	Hypothetical protein	1158280	1158582	+	PROKKA_01025	hypothetical protein	1158280	1158582	+					1	0	0	0	0	0	0
1029	PFR_JS13-1_1013	Hypothetical protein	1158732	1159262	+	PROKKA_01026	hypothetical protein	1158732	1159262	+					1	0	0	0	0	0	0
1030	PFR_JS13-1_1014	1-deoxy-D-xylulose 5-phosphate synthase dxs1	1159313	1161328	+	PROKKA_01027	1-deoxy-D-xylulose-5-phosphate synthase	1159313	1161328	+	2.2.1.7	dxs	similar to AA sequence:UniProtKB:Q9RBN6		1	0	0	0	0	0	0
1031	PFR_JS13-1_1015	Ribonuclease D	1161380	1162645	-	PROKKA_01028	Ribonuclease D	1161380	1162645	-	3.1.13.5	rnd	similar to AA sequence:UniProtKB:P09155		1	0	0	0	0	0	0
1032	PFR_JS13-1_1016	Outer membrane receptor protein	1162714	1163313	-	PROKKA_01029	hypothetical protein	1162714	1163313	-					1	0	0	0	0	0	0
1033	PFR_JS13-1_1017	Conserved hypothetical protein	1163399	1163923	-	PROKKA_01030	hypothetical protein	1163399	1163923	-			protein motif:CLUSTERS:PRK10670		1	0	0	0	0	0	0
1034	PFR_JS13-1_1018	Peptide methionine sulfoxide reductase MsrB	1163947	1164399	-	PROKKA_01031	Peptide methionine sulfoxide reductase MsrB	1163947	1164399	-	1.8.4.12	msrB	similar to AA sequence:UniProtKB:Q3JRF0		1	0	0	0	0	0	0
1035	PFR_JS13-1_1019	Polyphosphate:nucleotide phosphotransferase, PPK2	1164547	1165422	+	PROKKA_01032	Polyphosphate kinase 2 (PPK2)	1164547	1165422	+			protein motif:Pfam:PF03976.8		1	0	0	0	0	0	0
1036	PFR_JS13-1_1020	Cobalamin biosynthesis protein CbiX	1165548	1166390	-	PROKKA_01033	sirohydrochlorin cobaltochelatase	1165548	1166390	-			protein motif:CLUSTERS:PRK00923		1	0	0	0	0	0	0
1037						PROKKA_01034	tRNA-Val(cac)	1167049	1167122	-			COORDINATES:profile:Aragorn:1.2		0					0	0
1038						PROKKA_01035	tRNA-Gly(gcc)	1167526	1167599	+			COORDINATES:profile:Aragorn:1.2		0					0	0
1039						PROKKA_01036	tRNA-Cys(gca)	1167660	1167731	+			COORDINATES:profile:Aragorn:1.2		0					0	0
1040						PROKKA_01037	tRNA-Val(gac)	1167732	1167804	+			COORDINATES:profile:Aragorn:1.2		0					0	0
1041	PFR_JS13-1_1021	Threonine--tRNA ligase (Precursor)	1168118	1170160	+	PROKKA_01038	Threonine--tRNA ligase	1168118	1170160	+	6.1.1.3	thrS	similar to AA sequence:UniProtKB:P56881		1	0	0	0	0	0	0
1042	PFR_JS13-1_1022	Histidine triad domain protein	1170153	1170758	+	PROKKA_01039	AP-4-A phosphorylase	1170153	1170758	+	2.7.7.53		similar to AA sequence:UniProtKB:O06201		1	0	0	0	0	0	0
1043	PFR_JS13-1_1023	Phosphatidylinositol synthase pgsA1	1170751	1171380	+	PROKKA_01040	CDP-diacylglycerol--inositol 3-phosphatidyltransferase	1170751	1171380	+	2.7.8.11	pgsA	similar to AA sequence:UniProtKB:Q9F7Y9		1	0	0	0	0	0	0
1044	PFR_JS13-1_1024	Lipid A biosynthesis lauroyl acyltransferase	1171413	1172255	+	PROKKA_01041	Phosphatidylinositol mannoside acyltransferase	1171413	1172255	+	2.3.1.-		similar to AA sequence:UniProtKB:A0QWG5		1	0	0	0	0	0	0
1045	PFR_JS13-1_1025	Alpha-mannosyltransferase pimA	1172252	1173397	+	PROKKA_01042	GDP-mannose-dependent alpha-(1-2)-phosphatidylinositol mannosyltransferase	1172252	1173397	+	2.4.1.57	pimA	similar to AA sequence:UniProtKB:A0QWG6		1	0	0	0	0	0	0
1046	PFR_JS13-1_1026	Putative phosphatidylglycerophosphate synthase	1173437	1174114	+	PROKKA_01043	Putative CDP-diacylglycerol--glycerol-3-phosphate 3-phosphatidyl-transferase 2	1173437	1174114	+	2.7.8.5	pgsA2_2	similar to AA sequence:UniProtKB:O33288		1	0	0	0	0	0	0
1047	PFR_JS13-1_1027	PF05949 family protein	1174165	1174962	+	PROKKA_01044	hypothetical protein	1174165	1174962	+					1	0	0	0	0	0	0
1048	PFR_JS13-1_1028	Small basic protein	1174990	1175322	+	PROKKA_01045	hypothetical protein	1174990	1175322	+					1	0	0	0	0	0	0
1049	PFR_JS13-1_1029	Division initiation protein	1175315	1176049	+	PROKKA_01046	hypothetical protein	1175315	1176049	+					1	0	0	0	0	0	0
1050	PFR_JS13-1_1030	Glycine cleavage system H protein	1176161	1176544	+	PROKKA_01047	Glycine cleavage system H protein	1176161	1176544	+		gcvH	similar to AA sequence:UniProtKB:P0A6T9		1	0	0	0	0	0	0
1051	PFR_JS13-1_1031	FHA domain protein	1176710	1177198	+	PROKKA_01048	Glycogen accumulation regulator GarA	1176710	1177198	+		garA	similar to AA sequence:UniProtKB:A0QYG2		1	0	0	0	0	0	0
1052	PFR_JS13-1_1032	Transcriptional regulator, MerR family	1177198	1177932	+	PROKKA_01049	zinc-responsive transcriptional regulator	1177198	1177932	+			protein motif:CLUSTERS:PRK09514		1	0	0	0	0	0	0
1053	PFR_JS13-1_1033	Protein of hypothetical function DUF151	1177934	1178395	+	PROKKA_01050	hypothetical protein	1177934	1178395	+					1	0	0	0	0	0	0
1054	PFR_JS13-1_1034	Transcriptional regulator	1178576	1179151	+	PROKKA_01051	HTH-type transcriptional regulator GlnR	1178576	1179151	+		glnR	similar to AA sequence:UniProtKB:P37582		1	0	0	0	0	0	0
1055	PFR_JS13-1_1035	Glycine dehydrogenase	1179303	1182218	+	PROKKA_01052	Glycine dehydrogenase (decarboxylating)	1179303	1182218	+	1.4.4.2	gcvP	similar to AA sequence:UniProtKB:P74416		1	0	0	0	0	0	0
1056	PFR_JS13-1_1036	Inner membrane protein yhjD	1182236	1183684	+	PROKKA_01053	Inner membrane protein YhjD	1182236	1183684	+		yhjD	similar to AA sequence:UniProtKB:P37642		1	0	0	0	0	0	0
1057	PFR_JS13-1_1037	Phage infection protein	1183657	1185864	-	PROKKA_01054	ABC-2 family transporter protein	1183657	1185864	-			protein motif:Pfam:PF12698.1		1	0	0	0	0	0	0
1058	PFR_JS13-1_1038	ABC transporter related protein	1185869	1186681	-	PROKKA_01055	L-arabinose transporter ATP-binding protein	1185869	1186681	-			protein motif:CLUSTERS:PRK11288		1	0	0	0	0	0	0
1059	PFR_JS13-1_1039	Transcriptional regulator, TetR family	1186678	1187292	-	PROKKA_01056	HTH-type transcriptional regulator TtgR	1186678	1187292	-		ttgR	similar to AA sequence:UniProtKB:Q9AIU0		1	0	0	0	0	0	0
1060	PFR_JS13-1_1040	Adenosylcobinamide-GDP ribazoletransferase	1187386	1188207	-	PROKKA_01057	Cobalamin synthase	1187386	1188207	-	2.-.-.-	cobS	similar to AA sequence:UniProtKB:P36561		1	0	0	0	0	0	0
1061	PFR_JS13-1_1041	Bifunctional cobalamin biosynthesis protein cobU	1188167	1188838	-	PROKKA_01058	Bifunctional adenosylcobalamin biosynthesis protein CobU	1188167	1188838	-	2.7.1.156	cobU	similar to AA sequence:UniProtKB:P0AE76		1	0	0	0	0	0	0
1062	PFR_JS13-1_1042	Cobyrinic acid a,c-diamide synthase	1188835	1191420	-	PROKKA_01059	Cobyrinic acid A,C-diamide synthase	1188835	1191420	-		cobB_1	similar to AA sequence:UniProtKB:P21632		1	0	0	0	0	0	0
1063	PFR_JS13-1_1043	Cob(I)yrinic acid a,c-diamide	1191414	1192016	-	PROKKA_01060	Cob(I)yrinic acid a,c-diamide adenosyltransferase	1191414	1192016	-	2.5.1.17	cobO	similar to AA sequence:UniProtKB:P29930		1	0	0	0	0	0	0
1064	PFR_JS13-1_1044	Adenosylcobyric acid synthase	1192013	1193458	-	PROKKA_01061	Cobyric acid synthase	1192013	1193458	-		cobQ_1	similar to AA sequence:UniProtKB:P29932		1	0	0	0	0	0	0
1065	PFR_JS13-1_1045	Cobalamin biosynthesis protein CobD	1193455	1194486	-	PROKKA_01062	cobalamin biosynthesis protein	1193455	1194486	-			protein motif:CLUSTERS:PRK01209		1	0	0	0	0	0	0
1066	PFR_JS13-1_1046	Phosphoglycerate mutase family protein	1194490	1195068	+	PROKKA_01063	Phosphoserine phosphatase 1	1194490	1195068	+	3.1.3.3	pspA	similar to AA sequence:UniProtKB:D3DFG8		1	0	0	0	0	0	0
1067	PFR_JS13-1_1047	Alpha, alpha-trehalose-phosphate synthase otsA	1195327	1196808	-	PROKKA_01064	Trehalose-phosphate synthase	1195327	1196808	-	2.4.1.-	otsA	similar to AA sequence:UniProtKB:A0R4M9		1	0	0	0	0	0	0
1068	PFR_JS13-1_1048	Trehalose-phosphatase OtsB	1196970	1197827	+	PROKKA_01065	Trehalose-6-phosphate phosphatase	1196970	1197827	+	3.1.3.12	otsB	similar to AA sequence:UniProtKB:P31678		1	0	0	0	0	0	0
1069						PROKKA_01066	tRNA-Met(cat)	1197903	1197977	+			COORDINATES:profile:Aragorn:1.2		0					0	0
1070	PFR_JS13-1_1049	ADP-ribosyl-(Dinitrogen reductase) hydrolase	1198880	1199836	-	PROKKA_01067	ADP-ribosyl-[dinitrogen reductase] glycohydrolase	1198880	1199836	-	3.2.2.24	draG	similar to AA sequence:UniProtKB:P14300		0	0	0	0	0	0	0
1071	PFR_JS13-1_1050	Hypothetical protein	1199941	1201182	-	PROKKA_01068	hypothetical protein	1199941	1201182	-					0	0	0	0	0	0	0
1072	PFR_JS13-1_1051	Hypothetical protein	1201644	1201976	-	PROKKA_01069	hypothetical protein	1201644	1201976	-					1	0	0	0	0	0	0
1073	PFR_JS13-1_1052	Transcriptional activator, TenA family	1202014	1202709	-	PROKKA_01070	Thiaminase-2	1202014	1202709	-	3.5.99.2	tenA	similar to AA sequence:UniProtKB:P25052		1	0	0	0	0	0	0
1074	PFR_JS13-1_1053	DNA primase	1202879	1204747	+	PROKKA_01071	DNA primase	1202879	1204747	+	2.7.7.-	dnaG	similar to AA sequence:UniProtKB:P74893		1	0	0	0	0	0	0
1075	PFR_JS13-1_1054	RNA polymerase sigma factor	1204820	1205674	+	PROKKA_01072	RNA polymerase principal sigma factor HrdA	1204820	1205674	+		hrdA	similar to AA sequence:UniProtKB:P18182		1	0	0	0	0	0	0
1076	PFR_JS13-1_1055	Hypothetical protein	1205754	1206320	+	PROKKA_01073	hypothetical protein	1205754	1206320	+					1	0	0	0	0	0	0
1077						PROKKA_01074	tRNA-Asn(gtt)	1206404	1206479	+			COORDINATES:profile:Aragorn:1.2		0					0	0
1078	PFR_JS13-1_1056	Phosphofructokinase (Precursor)	1206650	1207864	-	PROKKA_01075	Pyrophosphate--fructose 6-phosphate 1-phosphotransferase	1206650	1207864	-	2.7.1.90	pfp	similar to AA sequence:UniProtKB:P29495		1	0	0	0	0	0	0
1079	PFR_JS13-1_1057	Hypothetical protein	1208088	1208510	+	PROKKA_01076	hypothetical protein	1208088	1208510	+					1	0	0	0	0	0	0
1080	PFR_JS13-1_1058	Translation factor SUA5	1208579	1209196	+	PROKKA_01077	Threonylcarbamoyl-AMP synthase	1208579	1209196	+	2.7.7.87	ywlC_1	similar to AA sequence:UniProtKB:P39153		1	0	0	0	0	0	0
1081	PFR_JS13-1_1059	Hypothetical protein	1209246	1210145	-	PROKKA_01078	intramembrane serine protease GlpG	1209246	1210145	-			protein motif:CLUSTERS:PRK10907		1	0	0	0	0	0	0
1082	PFR_JS13-1_1060	LmbE family protein	1210311	1211111	+	PROKKA_01079	1D-myo-inositol 2-acetamido-2-deoxy-alpha-D-glucopyranoside deacetylase	1210311	1211111	+	3.5.1.103	mshB_2	similar to AA sequence:UniProtKB:Q9F344		1	0	0	0	0	0	0
1083	PFR_JS13-1_1061	Proteasome assembly chaperones 2	1211250	1212287	-	PROKKA_01080	PAC2 family protein	1211250	1212287	-			protein motif:Pfam:PF09754.3		1	0	0	0	0	0	0
1084	PFR_JS13-1_1062	ABC-type uncharacterized transport system, ATPase	1212453	1213244	-	PROKKA_01081	Methionine import ATP-binding protein MetN 2	1212453	1213244	-	3.6.3.-	metN2	similar to AA sequence:UniProtKB:Q831K6		1	0	0	0	0	0	0
1085	PFR_JS13-1_1063	ABC transporter, permease protein	1213246	1214199	-	PROKKA_01082	ribose ABC transporter permease protein	1213246	1214199	-			protein motif:CLUSTERS:PRK09512		1	0	0	0	0	0	0
1086	PFR_JS13-1_1064	ABC transporter permease protein	1214206	1215207	-	PROKKA_01083	ABC transporter substrate binding protein	1214206	1215207	-			protein motif:Pfam:PF04392.6		1	0	0	0	0	0	0
1087	PFR_JS13-1_1065	Phosphoglycerate mutase family protein	1215375	1215998	+	PROKKA_01084	Glucosyl-3-phosphoglycerate phosphatase	1215375	1215998	+	3.1.3.-	gpgP_1	similar to AA sequence:UniProtKB:A1TC01		1	0	0	0	0	0	0
1088	PFR_JS13-1_1066	Glutamine--tRNA ligase (Precursor)	1216020	1217732	+	PROKKA_01085	Glutamine--tRNA ligase	1216020	1217732	+	6.1.1.18	glnS	similar to AA sequence:UniProtKB:P00962		1	0	0	0	0	0	0
1089	PFR_JS13-1_1067	TIGR03085 family protein	1217777	1218523	-	PROKKA_01086	hypothetical protein	1217777	1218523	-					1	0	0	0	0	0	0
1090	PFR_JS13-1_1068	Phosphoribosyl-AMP cyclohydrolase (Precursor)	1218539	1218991	+	PROKKA_01087	phosphoribosyl-AMP cyclohydrolase	1218539	1218991	+			protein motif:CLUSTERS:PRK00051		1	0	0	0	0	0	0
1091	PFR_JS13-1_1069	Anthranilate synthase component I	1218988	1220520	+	PROKKA_01088	Anthranilate synthase component 1	1218988	1220520	+	4.1.3.27	trpE	similar to AA sequence:UniProtKB:A0QX93		1	0	0	0	0	0	0
1092	PFR_JS13-1_1070	Indole-3-glycerol phosphate synthase 1	1220517	1221377	+	PROKKA_01089	Indole-3-glycerol phosphate synthase	1220517	1221377	+	4.1.1.48	trpC	similar to AA sequence:UniProtKB:A0QX95		1	0	0	0	0	0	0
1093	PFR_JS13-1_1071	Tryptophan synthase beta chain	1221370	1222623	+	PROKKA_01090	Tryptophan synthase beta chain	1221370	1222623	+	4.2.1.20	trpB_2	similar to AA sequence:UniProtKB:P66984		1	0	0	0	0	0	0
1094	PFR_JS13-1_1072	Tryptophan synthase alpha chain	1222620	1223516	+	PROKKA_01091	Tryptophan synthase alpha chain	1222620	1223516	+	4.2.1.20	trpA	similar to AA sequence:UniProtKB:O67502		1	0	0	0	0	0	0
1095	PFR_JS13-1_1073	Prolipoprotein diacylglyceryl transferase	1223513	1224484	+	PROKKA_01092	Prolipoprotein diacylglyceryl transferase	1223513	1224484	+	2.4.99.-	lgt	similar to AA sequence:UniProtKB:O34752		1	0	0	0	0	0	0
1096	PFR_JS13-1_1074	Class II glutamine amidotransferase	1224628	1229136	+	PROKKA_01093	Glutamate synthase [NADPH] large chain	1224628	1229136	+	1.4.1.13	gltB_1	similar to AA sequence:UniProtKB:P96218		1	0	0	0	0	0	0
1097	PFR_JS13-1_1075	Glutamate synthase subunit beta	1229129	1230598	+	PROKKA_01094	Glutamate synthase [NADPH] small chain	1229129	1230598	+	1.4.1.13	gltB_2	similar to AA sequence:UniProtKB:O34399		1	0	0	0	0	0	0
1098	PFR_JS13-1_1076	Hypothetical protein	1230618	1231289	-	PROKKA_01095	hypothetical protein	1230618	1231289	-					1	0	0	0	0	0	0
1099	PFR_JS13-1_1077	DNA polymerase III, alpha subunit	1231515	1235087	+	PROKKA_01096	DNA polymerase III subunit alpha	1231515	1235087	+	2.7.7.7	dnaE_2	similar to AA sequence:UniProtKB:Q9XDH5		0	0	0	0	0	0	0
1100	PFR_JS13-1_1078	Hypothetical protein	1235160	1235885	+	PROKKA_01097	hypothetical protein	1235160	1235885	+					0	0	0	0	0	0	0
1101	PFR_JS13-1_1079	Cys-tRNA(Pro)/Cys-tRNA(Cys) deacylase ybaK	1235922	1236440	-	PROKKA_01098	Cys-tRNA(Pro)/Cys-tRNA(Cys) deacylase YbaK	1235922	1236440	-	4.2.-.-	ybaK	similar to AA sequence:UniProtKB:P0AAR3		0	0	0	0	0	0	0
1102	PFR_JS13-1_1080	Uncharacterized membrane protein, possible Na	1236486	1237286	-	PROKKA_01099	putative membrane protein YdfK	1236486	1237286	-		ydfK	similar to AA sequence:UniProtKB:P96689		0	0	0	0	0	0	0
1103	PFR_JS13-1_1081	Histidinol dehydrogenase	1237364	1238677	+	PROKKA_01100	Histidinol dehydrogenase	1237364	1238677	+	1.1.1.23	hisD	similar to AA sequence:UniProtKB:P63950		1	0	0	0	0	0	0
1104	PFR_JS13-1_1082	Histidinol-phosphate aminotransferase 2	1238677	1239897	+	PROKKA_01101	Histidinol-phosphate aminotransferase	1238677	1239897	+	2.6.1.9	hisC	similar to AA sequence:UniProtKB:Q9KJU4		1	0	0	0	0	0	0
1105	PFR_JS13-1_1083	Imidazoleglycerol-phosphate dehydratase	1239894	1240502	+	PROKKA_01102	Imidazoleglycerol-phosphate dehydratase	1239894	1240502	+	4.2.1.19	hisB	similar to AA sequence:UniProtKB:P64368		1	0	0	0	0	0	0
1106	PFR_JS13-1_1084	Imidazole glycerol phosphate synthase subunit	1240499	1241176	+	PROKKA_01103	Imidazole glycerol phosphate synthase subunit HisH	1240499	1241176	+	2.4.2.-	hisH	similar to AA sequence:UniProtKB:P59957		1	0	0	0	0	0	0
1107	PFR_JS13-1_1085	Phosphoribosyl isomerase A	1241245	1241970	+	PROKKA_01104	Phosphoribosyl isomerase A	1241245	1241970	+	5.3.1.16	priA_1	similar to AA sequence:UniProtKB:P16250		1	0	0	0	0	0	0
1108	PFR_JS13-1_1086	Acetyltransferase, GNAT family	1241967	1243004	+	PROKKA_01105	putative acetyltransferase	1241967	1243004	+			protein motif:CLUSTERS:PRK03624		1	0	0	0	0	0	0
1109	PFR_JS13-1_1087	Probable transcriptional regulatory protein yebC	1243168	1243968	+	PROKKA_01106	putative transcriptional regulatory protein/MSMEI_2866	1243168	1243968	+			similar to AA sequence:UniProtKB:A0QWH1		1	0	0	0	0	0	0
1110	PFR_JS13-1_1088	Crossover junction endodeoxyribonuclease RuvC	1244237	1244848	+	PROKKA_01107	Crossover junction endodeoxyribonuclease RuvC	1244237	1244848	+	3.1.22.4	ruvC	similar to AA sequence:UniProtKB:Q5SJC4		1	0	0	0	0	0	0
1111	PFR_JS13-1_1089	Holliday junction ATP-dependent DNA helicase	1244845	1245456	+	PROKKA_01108	Holliday junction ATP-dependent DNA helicase RuvA	1244845	1245456	+	3.6.4.12	ruvA	similar to AA sequence:UniProtKB:A0QWH5		1	0	0	0	0	0	0
1112	PFR_JS13-1_1090	Holliday junction ATP-dependent DNA helicase	1245520	1246545	+	PROKKA_01109	Holliday junction ATP-dependent DNA helicase RuvB	1245520	1246545	+	3.6.4.12	ruvB	similar to AA sequence:UniProtKB:A0QWH6		1	0	0	0	0	0	0
1113	PFR_JS13-1_1091	Preprotein translocase, YajC subunit	1246656	1247159	+	PROKKA_01110	preprotein translocase subunit YajC	1246656	1247159	+			protein motif:CLUSTERS:PRK05585		1	0	0	0	0	0	0
1114	PFR_JS13-1_1092	Protein translocase subunit SecD	1247187	1248905	+	PROKKA_01111	preprotein translocase subunit SecD	1247187	1248905	+			protein motif:CLUSTERS:PRK05812		1	0	0	0	0	0	0
1115	PFR_JS13-1_1093	Protein translocase subunit SecF	1248905	1250152	+	PROKKA_01112	preprotein translocase subunit SecF	1248905	1250152	+			protein motif:CLUSTERS:PRK13022		1	0	0	0	0	0	0
1116	PFR_JS13-1_1094	Adenine phosphoribosyltransferase	1250155	1250694	+	PROKKA_01113	Adenine phosphoribosyltransferase	1250155	1250694	+	2.4.2.7	apt	similar to AA sequence:UniProtKB:Q66DQ2		1	0	0	0	0	0	0
1117	PFR_JS13-1_1095	GTP diphosphokinase	1250757	1253108	+	PROKKA_01114	Bifunctional (p)ppGpp synthase/hydrolase relA	1250757	1253108	+		relA_1	similar to AA sequence:UniProtKB:P66014		1	0	0	0	0	0	0
1118	PFR_JS13-1_1096	Conserved alanine and arginine rich protein	1253189	1254328	-	PROKKA_01115	hypothetical protein	1253189	1254328	-					1	0	0	0	0	0	0
1119	PFR_JS13-1_1097	Putative glyoxalase II (Hydroxyacylglutathione	1254432	1255151	+	PROKKA_01116	putative metallo-hydrolase	1254432	1255151	+	3.-.-.-		similar to AA sequence:UniProtKB:Q5XD24		1	0	0	0	0	0	0
1120	PFR_JS13-1_1098	HisS Histidyl-tRNA synthetase	1255151	1256482	+	PROKKA_01117	Histidine--tRNA ligase	1255151	1256482	+	6.1.1.21	hisS	similar to AA sequence:UniProtKB:Q8YMC2		1	0	0	0	0	0	0
1121	PFR_JS13-1_1099	Alpha-acetolactate decarboxylase AldC	1256596	1257411	+	PROKKA_01118	Alpha-acetolactate decarboxylase	1256596	1257411	+	4.1.1.5	alsD	similar to AA sequence:UniProtKB:Q04777		1	0	0	0	0	0	0
1122	PFR_JS13-1_1100	Hypothetical protein	1257620	1258693	+	PROKKA_01119	hypothetical protein	1257620	1258693	+					1	0	0	0	0	0	0
1123	PFR_JS13-1_1101	Aspartyl-tRNA synthetase aspS	1258893	1260740	+	PROKKA_01120	Aspartate--tRNA ligase	1258893	1260740	+	6.1.1.12	aspS	similar to AA sequence:UniProtKB:P21889		1	0	0	0	0	0	0
1124	PFR_JS13-1_1102	Recombination factor protein RarA	1260865	1262289	+	PROKKA_01121	Replication-associated recombination protein A	1260865	1262289	+		rarA	similar to AA sequence:UniProtKB:P0AAZ4		1	0	0	0	0	0	0
1125	PFR_JS13-1_1103	Lactate/malate dehydrogenase, NAD binding domain	1262344	1263324	+	PROKKA_01122	L-lactate dehydrogenase	1262344	1263324	+	1.1.1.27	ldh	similar to AA sequence:UniProtKB:Q9EVR0		1	0	0	0	0	0	0
1126	PFR_JS13-1_1104	Alanyl-tRNA synthetase AlaS	1263489	1266176	+	PROKKA_01123	Alanine--tRNA ligase	1263489	1266176	+	6.1.1.7	alaS	similar to AA sequence:UniProtKB:A0QWQ4		1	0	0	0	0	0	0
1127	PFR_JS13-1_1105	Putative crossover junction	1266160	1266705	+	PROKKA_01124	Putative Holliday junction resolvase	1266160	1266705	+	3.1.-.-	yrrK	similar to AA sequence:UniProtKB:O34634		1	0	0	0	0	0	0
1128	PFR_JS13-1_1106	Aminodeoxychorismate lyase	1266680	1267912	+	PROKKA_01125	putative aminodeoxychorismate lyase	1266680	1267912	+			protein motif:CLUSTERS:PRK10270		1	0	0	0	0	0	0
1129	PFR_JS13-1_1107	Chorismate synthase	1268016	1269218	+	PROKKA_01126	Chorismate synthase	1268016	1269218	+	4.2.3.5	aroC	similar to AA sequence:UniProtKB:P63611		1	0	0	0	0	0	0
1130	PFR_JS13-1_1108	Bifunctional shikimate kinase/3-dehydroquinate	1269215	1270864	+	PROKKA_01127	3-dehydroquinate synthase	1269215	1270864	+	4.2.3.4	aroB	similar to AA sequence:UniProtKB:P0A4Z4		1	0	0	0	0	0	0
1131	PFR_JS13-1_1109	Translation elongation factor P	1271023	1271604	+	PROKKA_01128	Elongation factor P	1271023	1271604	+		efp	similar to AA sequence:UniProtKB:A0QWR4		1	0	0	0	0	0	0
1132	PFR_JS13-1_1110	N utilization substance protein B homolog	1271604	1272230	+	PROKKA_01129	hypothetical protein	1271604	1272230	+			similar to AA sequence:UniProtKB:P95020	N utilization substance protein B homolog	1	0	0	0	0	0	0
1133	PFR_JS13-1_1111	Carbamoyl-phosphate synthase small chain	1272409	1273593	+	PROKKA_01130	Carbamoyl-phosphate synthase small chain	1272409	1273593	+	6.3.5.5	carA	similar to AA sequence:UniProtKB:P0A6F1		1	0	0	0	0	0	0
1134	PFR_JS13-1_1112	Carbamoyl-phosphate synthase large chain	1273593	1276934	+	PROKKA_01131	Carbamoyl-phosphate synthase large chain	1273593	1276934	+	6.3.5.5	carB	similar to AA sequence:UniProtKB:P00968		1	0	0	0	0	0	0
1135	PFR_JS13-1_1113	Dihydroorotate dehydrogenase (quinone)	1277016	1278116	+	PROKKA_01132	Dihydroorotate dehydrogenase (quinone)	1277016	1278116	+	1.3.5.2	pyrD	similar to AA sequence:UniProtKB:P0A7E1		1	0	0	0	0	0	0
1136	PFR_JS13-1_1114	Orotidine 5'-phosphate decarboxylase	1278113	1278922	+	PROKKA_01133	orotidine 5'-phosphate decarboxylase	1278113	1278922	+			protein motif:CLUSTERS:PRK00125		1	0	0	0	0	0	0
1137	PFR_JS13-1_1115	Integration host factor family protein	1279085	1279396	+	PROKKA_01134	hypothetical protein	1279085	1279396	+					1	0	0	0	0	0	0
1138	PFR_JS13-1_1116	Guanylate kinase	1279400	1280020	+	PROKKA_01135	Guanylate kinase	1279400	1280020	+	2.7.4.8	gmk	similar to AA sequence:UniProtKB:P0A5I4		1	0	0	0	0	0	0
1139	PFR_JS13-1_1117	DNA-directed RNA polymerase, omega subunit	1280080	1280448	+	PROKKA_01136	DNA-directed RNA polymerase subunit omega	1280080	1280448	+	2.7.7.6	rpoZ	similar to AA sequence:UniProtKB:Q9KXS1		1	0	0	0	0	0	0
1140	PFR_JS13-1_1118	S-adenosylmethionine synthase MetK	1280514	1281704	+	PROKKA_01137	S-adenosylmethionine synthase	1280514	1281704	+	2.5.1.6	metK	similar to AA sequence:UniProtKB:A0QWT3		1	0	0	0	0	0	0
1141	PFR_JS13-1_1119	Primosomal protein N' PriA	1281815	1283836	+	PROKKA_01138	Primosomal protein N'	1281815	1283836	+	3.6.4.-	priA_2	similar to AA sequence:UniProtKB:P17888		1	0	0	0	0	0	0
1142	PFR_JS13-1_1120	Methionyl-tRNA formyltransferase Fmt	1283914	1284861	+	PROKKA_01139	Methionyl-tRNA formyltransferase	1283914	1284861	+	2.1.2.9	fmt	similar to AA sequence:UniProtKB:A0QWU2		1	0	0	0	0	0	0
1143	PFR_JS13-1_1121	Putative ribosomal RNA small subunit	1284854	1286323	+	PROKKA_01140	Ribosomal RNA small subunit methyltransferase B	1284854	1286323	+	2.1.1.176	rsmB	similar to AA sequence:UniProtKB:P36929		1	0	0	0	0	0	0
1144	PFR_JS13-1_1122	Ribulose-phosphate 3-epimerase Rpe	1286358	1287020	+	PROKKA_01141	Ribulose-phosphate 3-epimerase	1286358	1287020	+	5.1.3.1	rpe	similar to AA sequence:UniProtKB:P0AG07		1	0	0	0	0	0	0
1145	PFR_JS13-1_1123	Aminopeptidase C	1287080	1288411	+	PROKKA_01142	Aminopeptidase C	1287080	1288411	+	3.4.22.40	pepC_1	similar to AA sequence:UniProtKB:Q04723		1	0	0	0	0	0	0
1146	PFR_JS13-1_1124	Proteasome assembly chaperones 2	1288512	1289321	-	PROKKA_01143	PAC2 family protein	1288512	1289321	-			protein motif:Pfam:PF09754.3		1	0	0	0	0	0	0
1147	PFR_JS13-1_1125	5-methyltetrahydrofolate-homocysteine	1289494	1292961	+	PROKKA_01144	Methionine synthase	1289494	1292961	+	2.1.1.13	metH	similar to AA sequence:UniProtKB:P13009		1	0	0	0	0	0	0
1148	PFR_JS13-1_1126	Signal peptide peptidase SppA	1293253	1294509	-	PROKKA_01145	Putative signal peptide peptidase SppA	1293253	1294509	-	3.4.21.-	sppA	similar to AA sequence:UniProtKB:O34525		1	0	0	0	0	0	0
1149	PFR_JS13-1_1127	HAD-superfamily hydrolase, subfamily IA, variant	1294693	1295418	+	PROKKA_01146	Phosphorylated carbohydrates phosphatase	1294693	1295418	+	3.1.3.-		similar to AA sequence:UniProtKB:Q9X0Y1		1	0	0	0	0	0	0
1150	PFR_JS13-1_1128	TRNA (Adenine-58-N(1)-) methyltransferase	1295415	1296485	+	PROKKA_01147	tRNA (adenine(58)-N(1))-methyltransferase TrmI	1295415	1296485	+	2.1.1.220	trmI	similar to AA sequence:UniProtKB:O33253		1	0	0	0	0	0	0
1151	PFR_JS13-1_1129	Proteasome subunit beta	1296478	1297344	+	PROKKA_01148	Proteasome subunit beta precursor	1296478	1297344	+	3.4.25.1	prcB	similar to AA sequence:UniProtKB:Q7AKQ5		1	0	0	0	0	0	0
1152	PFR_JS13-1_1130	Proteasome subunit alpha	1297341	1298066	+	PROKKA_01149	Proteasome subunit alpha	1297341	1298066	+	3.4.25.1	prcA	similar to AA sequence:UniProtKB:Q7AKQ6		1	0	0	0	0	0	0
1153	PFR_JS13-1_1131	Prephenate dehydrogenase	1298068	1299162	+	PROKKA_01150	T-protein	1298068	1299162	+		tyrA_1	similar to AA sequence:UniProtKB:P07023		1	0	0	0	0	0	0
1154	PFR_JS13-1_1132	Putative cytidylate kinase	1299202	1299873	+	PROKKA_01151	Cytidylate kinase	1299202	1299873	+	2.7.4.25	cmk	similar to AA sequence:UniProtKB:P63803		1	0	0	0	0	0	0
1155	PFR_JS13-1_1133	GTPase Der	1299988	1301337	+	PROKKA_01152	GTPase Der	1299988	1301337	+		der	similar to AA sequence:UniProtKB:P50743		1	0	0	0	0	0	0
1156	PFR_JS13-1_1134	Protein of hypothetical function DUF1706	1301372	1301881	-	PROKKA_01153	hypothetical protein	1301372	1301881	-					1	0	0	0	0	0	0
1157	PFR_JS13-1_1135	Major facilitator superfamily protein 35	1302005	1303507	+	PROKKA_01154	Antiseptic resistance protein	1302005	1303507	+		qacA_2	similar to AA sequence:UniProtKB:P0A0J9		1	0	0	0	0	0	0
1158	PFR_JS13-1_1136	TetR-family transcription regulator	1303533	1304111	+	PROKKA_01155	HTH-type transcriptional regulator RutR	1303533	1304111	+		rutR	similar to AA sequence:UniProtKB:P0ACU2		1	0	0	0	0	0	0
1159	PFR_JS13-1_1137	Zinc-containing alcohol dehydrogenase (ADH)	1304157	1305107	-	PROKKA_01156	ethanol-active dehydrogenase/acetaldehyde-active reductase	1304157	1305107	-			protein motif:CLUSTERS:PRK09422		0	0	0	0	0	0	0
1160	PFR_JS13-1_1138	Putative membrane protein	1305216	1306091	-	PROKKA_01157	Threonine/homoserine exporter RhtA	1305216	1306091	-		rhtA	similar to AA sequence:UniProtKB:P0AA67		0	0	0	0	0	0	0
1161	PFR_JS13-1_1139	Hypothetical protein	1306262	1306783	+	PROKKA_01158	hypothetical protein	1306262	1306783	+					1	0	0	0	0	0	0
1162	PFR_JS13-1_1140	Transcriptional regulator	1306776	1307081	+	PROKKA_01159	Helix-turn-helix domain protein	1306776	1307081	+			protein motif:Pfam:PF12840.1		1	0	0	0	0	0	0
1163						PROKKA_01160	tRNA-Pro(ggg)	1307243	1307318	-			COORDINATES:profile:Aragorn:1.2		0					0	0
1164	PFR_JS13-1_1141	S-ribosylhomocysteinase LuxS	1307478	1307942	+	PROKKA_01161	S-ribosylhomocysteine lyase	1307478	1307942	+	4.4.1.21	luxS	similar to AA sequence:UniProtKB:Q9ZMW8		1	0	0	0	0	0	0
1165	PFR_JS13-1_1142	Antiseptic resistance protein	1308134	1309714	+	PROKKA_01162	Antiseptic resistance protein	1308134	1309714	+		qacA_3	similar to AA sequence:UniProtKB:P0A0J9		1	0	0	0	0	0	0
1166	PFR_JS13-1_1143	Nitrate/sulfonate/bicarbonate ABC transporter,	1310021	1310911	+	PROKKA_01163	Carnitine transport permease protein OpuCD	1310021	1310911	+		opuCD	similar to AA sequence:UniProtKB:Q9KHT6		1	0	0	0	0	0	0
1167	PFR_JS13-1_1144	ABC-type nitrate/sulfonate/bicarbonate transport	1310908	1311915	+	PROKKA_01164	Putative thiamine biosynthesis protein	1310908	1311915	+			similar to AA sequence:UniProtKB:P44658		1	0	0	0	0	0	0
1168	PFR_JS13-1_1145	Homoserine O-acetyltransferase (Precursor)	1312097	1313350	+	PROKKA_01165	Homoserine O-acetyltransferase	1312097	1313350	+	2.3.1.31	metX	similar to AA sequence:UniProtKB:Q8F4I0		1	0	0	0	0	0	0
1169	PFR_JS13-1_1146	Methionine biosynthesis protein MetW	1313347	1314033	+	PROKKA_01166	hypothetical protein	1313347	1314033	+			protein motif:CLUSTERS:PRK08317		1	0	0	0	0	0	0
1170	PFR_JS13-1_1147	Transcriptional regulator, AsnC family	1314169	1314582	+	PROKKA_01167	HTH-type transcriptional regulator LrpC	1314169	1314582	+		lrpC	similar to AA sequence:UniProtKB:P96582		1	0	0	0	0	0	0
1171	PFR_JS13-1_1148	Hypothetical protein	1314676	1316310	+	PROKKA_01168	Apolipoprotein N-acyltransferase	1314676	1316310	+	2.3.1.-	lnt	similar to AA sequence:UniProtKB:P23930		1	0	0	0	0	0	0
1172	PFR_JS13-1_1149	ApolipoproteiN n-acyltransferase	1316397	1317203	+	PROKKA_01169	Undecaprenyl-phosphate mannosyltransferase	1316397	1317203	+	2.4.1.54		similar to AA sequence:UniProtKB:C5CBV8		1	0	0	0	0	0	0
1173	PFR_JS13-1_1150	PF13397 domain protein	1317299	1317637	-	PROKKA_01170	RNA polymerase-binding protein RbpA	1317299	1317637	-		rbpA_2	similar to AA sequence:UniProtKB:Q9RKY0		1	0	0	0	0	0	0
1174	PFR_JS13-1_1151	Glycerophosphodiester phosphodiesterase family	1317744	1318541	-	PROKKA_01171	Glycerophosphoryl diester phosphodiesterase	1317744	1318541	-	3.1.4.46	ugpQ_1	similar to AA sequence:UniProtKB:P10908		1	0	0	0	0	0	0
1175	PFR_JS13-1_1152	Hypothetical protein	1318586	1319110	-	PROKKA_01172	Putative transmembrane protein (PGPGW)	1318586	1319110	-			protein motif:Pfam:PF09656.4		1	0	0	0	0	0	0
1176	PFR_JS13-1_1153	Pyridoxal kinase	1319248	1319952	+	PROKKA_01173	Pyridoxamine kinase	1319248	1319952	+	2.7.1.35	pdxY	similar to AA sequence:UniProtKB:Q7CIR8		1	0	0	0	0	0	0
1177	PFR_JS13-1_1154	UDP-N-acetylglucosamine 1-carboxyvinyltransferase	1319912	1321381	-	PROKKA_01174	UDP-N-acetylglucosamine 1-carboxyvinyltransferase	1319912	1321381	-	2.5.1.7	murA	similar to AA sequence:UniProtKB:Q3KHZ4		1	0	0	0	0	0	0
1178	PFR_JS13-1_1155	Dihydrolipoyl dehydrogenase	1321594	1322994	+	PROKKA_01175	Dihydrolipoyl dehydrogenase	1321594	1322994	+	1.8.1.4	lpdC	similar to AA sequence:UniProtKB:P66004		1	0	0	0	0	0	0
1179	PFR_JS13-1_1156	Extracellular ligand-binding receptor	1323190	1324353	+	PROKKA_01176	hypothetical protein	1323190	1324353	+			similar to AA sequence:UniProtKB:Q8YEE8	Leu/Ile/Val-binding protein homolog 3 precursor	1	0	0	0	0	0	0
1180	PFR_JS13-1_1157	High-affinity branched-chain amino acid transport	1324450	1325334	+	PROKKA_01177	High-affinity branched-chain amino acid transport system permease protein LivH	1324450	1325334	+		livH_1	similar to AA sequence:UniProtKB:P0AEX7		1	0	0	0	0	0	0
1181	PFR_JS13-1_1158	Branched-chain amino acid ABC transporter,	1325331	1326350	+	PROKKA_01178	High-affinity branched-chain amino acid transport system permease protein LivH	1325331	1326350	+		livH_2	similar to AA sequence:UniProtKB:P0AEX7		1	0	0	0	0	0	0
1182	PFR_JS13-1_1159	Branched-chain amino acid ABC superfamily ATP	1326347	1327138	+	PROKKA_01179	Lipopolysaccharide export system ATP-binding protein LptB	1326347	1327138	+	3.6.3.-	lptB	similar to AA sequence:UniProtKB:P45073		1	0	0	0	0	0	0
1183	PFR_JS13-1_1160	Branched-chain amino acid ABC transporter,	1327131	1327835	+	PROKKA_01180	High-affinity branched-chain amino acid transport ATP-binding protein LivF	1327131	1327835	+		livF	similar to AA sequence:UniProtKB:P22731		1	0	0	0	0	0	0
1184	PFR_JS13-1_1161	CBS domain protein/ACT domain-containing protein	1327837	1328487	+	PROKKA_01181	Hypoxic response protein 1	1327837	1328487	+		hrp1	similar to AA sequence:UniProtKB:O06186		1	0	0	0	0	0	0
1185	PFR_JS13-1_1162	PTS system fructose IIA component	1328519	1328941	-	PROKKA_01182	PTS system mannose-specific EIIAB component	1328519	1328941	-		manX	similar to AA sequence:UniProtKB:P69797		1	0	0	0	0	0	0
1186	PFR_JS13-1_1163	Dipeptidase pepE	1329414	1330547	+	PROKKA_01183	Xaa-Pro dipeptidase	1329414	1330547	+	3.4.13.9	pepQ	similar to AA sequence:UniProtKB:Q9S6S1		0	0	0	0	0	0	0
1187	PFR_JS13-1_1164	Putative integral membrane esterase	1330577	1331893	-	PROKKA_01184	Putative esterase	1330577	1331893	-			protein motif:Pfam:PF00756.14		0	0	0	0	0	0	0
1188	PFR_JS13-1_1165	Hypothetical protein	1331890	1334373	-	PROKKA_01185	Phosphatidylglycerol lysyltransferase	1331890	1334373	-	2.3.2.3	mprF	similar to AA sequence:UniProtKB:C0H3X7		0	0	0	0	0	0	0
1189	PFR_JS13-1_1166	Aspartyl/glutamyl-tRNA(Asn/Gln) amidotransferase	1334582	1336093	-	PROKKA_01186	Aspartyl/glutamyl-tRNA(Asn/Gln) amidotransferase subunit B	1334582	1336093	-	6.3.5.-	gatB	similar to AA sequence:UniProtKB:O66766		1	0	0	0	0	0	0
1190	PFR_JS13-1_1167	Glutamyl-tRNA(Gln) amidotransferase subunit A	1336090	1337622	-	PROKKA_01187	Glutamyl-tRNA(Gln) amidotransferase subunit A	1336090	1337622	-	6.3.5.-	gatA	similar to AA sequence:UniProtKB:Q8NR17		1	0	0	0	0	0	0
1191	PFR_JS13-1_1168	Aspartyl/glutamyl-tRNA(Asn/Gln) amidotransferase	1337630	1337932	-	PROKKA_01188	Aspartyl/glutamyl-tRNA(Asn/Gln) amidotransferase subunit C	1337630	1337932	-	6.3.5.-	gatC	similar to AA sequence:UniProtKB:P68808		1	0	0	0	0	0	0
1192	PFR_JS13-1_1169	Amino acid-binding ACT domain protein	1338153	1338779	+	PROKKA_01189	ACT domain protein	1338153	1338779	+			protein motif:Pfam:PF01842.19		1	0	0	0	0	0	0
1193	PFR_JS13-1_1170	Hypothetical membrane anchored protein	1338800	1339003	-	PROKKA_01190	hypothetical protein	1338800	1339003	-					1	0	0	0	0	0	0
1194	PFR_JS13-1_1171	Methionine synthase, vitamin-B12 independent	1339072	1340058	-	PROKKA_01191	Cobalamin-independent synthase, Catalytic domain	1339072	1340058	-			protein motif:Pfam:PF01717.12		1	0	0	0	0	0	0
1195	PFR_JS13-1_1172	TRNA	1340104	1341177	-	PROKKA_01192	tRNA-specific 2-thiouridylase MnmA	1340104	1341177	-	2.8.1.-	mnmA	similar to AA sequence:UniProtKB:Q99TM8		1	0	0	0	0	0	0
1196	PFR_JS13-1_1173	Glycogen debranching enzyme GlgX	1341434	1343626	+	PROKKA_01193	Glycogen debranching enzyme	1341434	1343626	+	3.2.1.-	glgX	similar to AA sequence:UniProtKB:P15067		1	0	0	0	0	0	0
1197	PFR_JS13-1_1174	Hypothetical protein	1343844	1344431	+	PROKKA_01194	hypothetical protein	1343844	1344431	+					0	0	0	0	0	0	0
1198	PFR_JS13-1_1175	Hypothetical protein	1344413	1345267	+	PROKKA_01195	hypothetical protein	1344413	1345267	+					0	0	0	0	0	0	0
1199	PFR_JS13-1_1176	Phosphorylase	1345432	1347945	-	PROKKA_01196	Maltodextrin phosphorylase	1345432	1347945	-	2.4.1.1	malP	similar to AA sequence:UniProtKB:P00490		1	0	0	0	0	0	0
1200	PFR_JS13-1_1177	Alpha-1,4-glucan:maltose-1-phosphate	1348149	1350263	+	PROKKA_01197	Alpha-1,4-glucan:maltose-1-phosphate maltosyltransferase 2	1348149	1350263	+	2.4.99.16	glgE2	similar to AA sequence:UniProtKB:Q9KY04		1	0	0	0	0	0	0
1201	PFR_JS13-1_1178	Maltose alpha-D-glucosyltransferase	1350349	1352148	+	PROKKA_01198	Trehalose synthase/amylase TreS	1350349	1352148	+	3.2.1.1	treS	similar to AA sequence:UniProtKB:A0R6E0		1	0	0	0	0	0	0
1202	PFR_JS13-1_1179	Maltokinase	1352164	1353501	+	PROKKA_01199	Maltokinase	1352164	1353501	+	2.7.1.175	mak1	similar to AA sequence:UniProtKB:Q7WUM3		1	0	0	0	0	0	0
1203	PFR_JS13-1_1180	1,4-alpha-glucan branching enzyme GlgB	1353494	1355398	+	PROKKA_01200	1,4-alpha-glucan branching enzyme GlgB	1353494	1355398	+	2.4.1.18	glgB	similar to AA sequence:UniProtKB:Q10625		1	0	0	0	0	0	0
1204	PFR_JS13-1_1181	Hydrolase, NUDIX family	1355434	1356219	+	PROKKA_01201	hypothetical protein	1355434	1356219	+			protein motif:CLUSTERS:PRK08999		0	0	0	0	0	0	0
1205	PFR_JS13-1_1182	Phosphoglucomutase PgmA	1356335	1357966	-	PROKKA_01202	Phosphoglucomutase	1356335	1357966	-	5.4.2.2	pgm	similar to AA sequence:UniProtKB:P36938		1	0	0	0	0	0	0
1206	PFR_JS13-1_1183	Thioredoxin	1358099	1359091	+	PROKKA_01203	hypothetical protein	1358099	1359091	+					1	0	0	0	0	0	0
1207	PFR_JS13-1_1184	4-hydroxyphenylpyruvate dioxygenase C domain	1359323	1359769	+	PROKKA_01204	Glyoxalase/Bleomycin resistance protein/Dioxygenase superfamily protein	1359323	1359769	+			protein motif:Pfam:PF00903.19		1	0	0	0	0	0	0
1208	PFR_JS13-1_1185	Putative phosphate acyltransferase	1359925	1360500	+	PROKKA_01205	hypothetical protein	1359925	1360500	+					1	0	0	0	0	0	0
1209	PFR_JS13-1_1186	Hypothetical protein	1360659	1362452	+	PROKKA_01206	hypothetical protein	1360659	1362452	+					1	0	0	0	0	0	0
1210	PFR_JS13-1_1187	Endonuclease NucS	1362493	1363140	-	PROKKA_01207	hypothetical protein	1362493	1363140	-			protein motif:CLUSTERS:PRK03298		1	0	0	0	0	0	0
1211	PFR_JS13-1_1188	Hypothetical protein	1363297	1363575	+	PROKKA_01208	hypothetical protein	1363297	1363575	+					1	0	0	0	0	0	0
1212	PFR_JS13-1_1189	Abhydrolase domain-containing protein 11	1363572	1364402	+	PROKKA_01209	Esterase YbfF	1363572	1364402	+	3.1.-.-	ybfF	similar to AA sequence:UniProtKB:P75736		1	0	0	0	0	0	0
1213	PFR_JS13-1_1190	ATP:cob(I)alamin adenosyltransferase	1364481	1365089	+	PROKKA_01210	Cob(I)yrinic acid a,c-diamide adenosyltransferase	1364481	1365089	+	2.5.1.17		similar to AA sequence:UniProtKB:P64803		1	0	0	0	0	0	0
1214	PFR_JS13-1_1191	Lipoate-protein ligase LplJ	1365262	1366326	-	PROKKA_01211	putative lipoate-protein ligase A	1365262	1366326	-	2.7.7.63	lplA	similar to AA sequence:UniProtKB:P75394		1	0	0	0	0	0	0
1215	PFR_JS13-1_1192	Hypothetical protein	1366350	1366808	-	PROKKA_01212	hypothetical protein	1366350	1366808	-					1	0	0	0	0	0	0
1216	PFR_JS13-1_1193	ATP synthase F1, epsilon subunit	1366850	1367317	-	PROKKA_01213	ATP synthase epsilon chain	1366850	1367317	-		atpC	similar to AA sequence:UniProtKB:P0A2Z7		1	0	0	0	0	0	0
1217	PFR_JS13-1_1194	ATP synthase subunit beta	1367317	1368768	-	PROKKA_01214	ATP synthase subunit beta	1367317	1368768	-	3.6.3.14	atpD	similar to AA sequence:UniProtKB:A0R200		1	0	0	0	0	0	0
1218	PFR_JS13-1_1195	ATP synthase gamma chain	1368769	1369704	-	PROKKA_01215	ATP synthase gamma chain	1368769	1369704	-		atpG	similar to AA sequence:UniProtKB:P50007		1	0	0	0	0	0	0
1219	PFR_JS13-1_1196	ATP synthase subunit alpha	1369707	1371344	-	PROKKA_01216	ATP synthase subunit alpha	1369707	1371344	-	3.6.3.14	atpA	similar to AA sequence:UniProtKB:P50001		1	0	0	0	0	0	0
1220	PFR_JS13-1_1197	ATP synthase F1, delta subunit	1371419	1372198	-	PROKKA_01217	ATP synthase subunit delta	1371419	1372198	-		atpH	similar to AA sequence:UniProtKB:P50008		1	0	0	0	0	0	0
1221	PFR_JS13-1_1198	ATP synthase subunit b	1372195	1372749	-	PROKKA_01218	ATP synthase subunit b	1372195	1372749	-		atpF	similar to AA sequence:UniProtKB:P80285		1	0	0	0	0	0	0
1222	PFR_JS13-1_1199	ATP synthase C chain (F1F0-ATPase subunit c )	1372760	1372978	-	PROKKA_01219	ATP synthase subunit c	1372760	1372978	-		atpE	similar to AA sequence:UniProtKB:Q2RFX4		1	0	0	0	0	0	0
1223	PFR_JS13-1_1200	ATP synthase subunit a	1373024	1373905	-	PROKKA_01220	ATP synthase subunit a	1373024	1373905	-		atpB	similar to AA sequence:UniProtKB:O05330		1	0	0	0	0	0	0
1224	PFR_JS13-1_1201	Hypothetical protein	1373898	1374122	-	PROKKA_01221	Putative F0F1-ATPase subunit (ATPase_gene1)	1373898	1374122	-			protein motif:Pfam:PF09527.4		1	0	0	0	0	0	0
1225	PFR_JS13-1_1202	Hypothetical protein	1374119	1374520	-	PROKKA_01222	hypothetical protein	1374119	1374520	-					1	0	0	0	0	0	0
1226	PFR_JS13-1_1203	Glycosyltransferase, group 4 family	1374634	1375770	-	PROKKA_01223	Decaprenyl-phosphate N-acetylglucosaminephosphotransferase	1374634	1375770	-	2.7.8.35	wecA	similar to AA sequence:UniProtKB:Q10606		1	0	0	0	0	0	0
1227	PFR_JS13-1_1204	TRNA threonylcarbamoyladenosine biosynthesis	1375779	1376657	-	PROKKA_01224	Threonylcarbamoyl-AMP synthase	1375779	1376657	-	2.7.7.87	ywlC_2	similar to AA sequence:UniProtKB:P39153		1	0	0	0	0	0	0
1228	PFR_JS13-1_1205	Release factor glutamine methyltransferase	1376654	1377532	-	PROKKA_01225	Release factor glutamine methyltransferase	1376654	1377532	-	2.1.1.-	prmC	similar to AA sequence:UniProtKB:P0ACC1		1	0	0	0	0	0	0
1229	PFR_JS13-1_1206	Peptide chain release factor 1	1377529	1378608	-	PROKKA_01226	Peptide chain release factor 1	1377529	1378608	-		prfA	similar to AA sequence:UniProtKB:P96077		1	0	0	0	0	0	0
1230	PFR_JS13-1_1207	50S ribosomal protein L31	1378716	1378940	-	PROKKA_01227	50S ribosomal protein L31	1378716	1378940	-		rpmE	similar to AA sequence:UniProtKB:Q9K4E5		1	0	0	0	0	0	0
1231	PFR_JS13-1_1208	Transcription termination factor Rho	1379077	1381047	-	PROKKA_01228	hypothetical protein	1379077	1381047	-			similar to AA sequence:UniProtKB:P52157	Transcription termination factor Rho	1	0	0	0	0	0	0
1232	PFR_JS13-1_1209	Phosphoserine phosphatase/homoserine	1381441	1382064	-	PROKKA_01229	haloacid dehalogenase-like hydrolase	1381441	1382064	-			protein motif:Pfam:PF12710.1		1	0	0	0	0	0	0
1233	PFR_JS13-1_1210	Homoserine dehydrogenase	1382073	1383398	-	PROKKA_01230	Homoserine dehydrogenase	1382073	1383398	-	1.1.1.3	hom	similar to AA sequence:UniProtKB:P08499		1	0	0	0	0	0	0
1234	PFR_JS13-1_1211	Diaminopimelate decarboxylase	1383409	1384803	-	PROKKA_01231	Diaminopimelate decarboxylase	1383409	1384803	-	4.1.1.20	lysA	similar to AA sequence:UniProtKB:P0A5M4		0	0	0	0	0	0	0
1235						PROKKA_01232	tRNA-Arg(ccg)	1384942	1385015	+			COORDINATES:profile:Aragorn:1.2		0					0	0
1236	PFR_JS13-1_1212	Transmembrane protein dedA	1385164	1385934	-	PROKKA_01233	Inner membrane protein YohD	1385164	1385934	-		yohD	similar to AA sequence:UniProtKB:P33366		0	0	0	0	0	0	0
1237	PFR_JS13-1_1213	LigA	1386039	1387457	+	PROKKA_01234	hypothetical protein	1386039	1387457	+					0	0	0	0	0	0	0
1238	PFR_JS13-1_1214	LigA	1387598	1388893	+	PROKKA_01235	hypothetical protein	1387598	1388893	+					1	0	0	0	0	0	0
1239	PFR_JS13-1_1215	Hypothetical protein	1388886	1390292	+	PROKKA_01236	hypothetical protein	1388886	1390292	+					1	0	0	0	0	0	0
1240	PFR_JS13-1_1216	Oxoglutarate dehydrogenase	1390362	1394147	+	PROKKA_01237	Multifunctional 2-oxoglutarate metabolism enzyme	1390362	1394147	+	2.2.1.5	kgd	similar to AA sequence:UniProtKB:A0R2B1		1	0	0	0	0	0	0
1241	PFR_JS13-1_1217	Transcription factor WhiB	1394392	1394640	+	PROKKA_01238	Transcriptional regulator WhiB1	1394392	1394640	+		whiB1	similar to AA sequence:UniProtKB:O05847		1	0	0	0	0	0	0
1242	PFR_JS13-1_1218	Sensor histidine kinase	1394745	1396253	-	PROKKA_01239	putative sensor histidine kinase pdtaS	1394745	1396253	-	2.7.13.3	pdtaS	similar to AA sequence:UniProtKB:O05846		1	0	0	0	0	0	0
1243	PFR_JS13-1_1219	Hypothetical protein	1396755	1397066	-	PROKKA_01240	Anti-sigma factor RsrA	1396755	1397066	-		rsrA	similar to AA sequence:UniProtKB:Q7AKG8		1	0	0	0	0	0	0
1244	PFR_JS13-1_1220	RNA polymerase sigma factor	1397059	1397646	-	PROKKA_01241	ECF RNA polymerase sigma factor SigR	1397059	1397646	-		sigR	similar to AA sequence:UniProtKB:Q7AKG9		1	0	0	0	0	0	0
1245	PFR_JS13-1_1221	UPF0361 protein yoqW	1397787	1398539	-	PROKKA_01242	Putative SOS response-associated peptidase YedK	1397787	1398539	-	3.4.-.-	yedK	similar to AA sequence:UniProtKB:P76318		1	0	0	0	0	0	0
1246	PFR_JS13-1_1222	3-phosphoshikimate 1-carboxyvinyltransferase	1398687	1400039	+	PROKKA_01243	3-phosphoshikimate 1-carboxyvinyltransferase	1398687	1400039	+	2.5.1.19	aroA	similar to AA sequence:UniProtKB:P22487		1	0	0	0	0	0	0
1247	PFR_JS13-1_1223	Putative ribosome biogenesis GTPase RsgA	1400036	1401106	+	PROKKA_01244	Putative ribosome biogenesis GTPase RsgA	1400036	1401106	+	3.6.1.-	rsgA	similar to AA sequence:UniProtKB:Q8ZKB0		1	0	0	0	0	0	0
1248	PFR_JS13-1_1224	Putative histidinol-phosphate phosphatase,	1401160	1401975	+	PROKKA_01245	Histidinol-phosphatase	1401160	1401975	+	3.1.3.15	hisN	similar to AA sequence:UniProtKB:Q9K4B1		1	0	0	0	0	0	0
1249	PFR_JS13-1_1225	PF14262 domain protein	1402029	1403762	-	PROKKA_01246	hypothetical protein	1402029	1403762	-					1	0	0	0	0	0	0
1250	PFR_JS13-1_1226	VTC domain protein	1403759	1404571	-	PROKKA_01247	VTC domain protein	1403759	1404571	-			protein motif:Pfam:PF09359.4		1	0	0	0	0	0	0
1251	PFR_JS13-1_1227	Conserved domain protein	1404568	1405203	-	PROKKA_01248	hypothetical protein	1404568	1405203	-					1	0	0	0	0	0	0
1252	PFR_JS13-1_1228	Exopolysaccharide biosynthesis protein related to	1405360	1406307	+	PROKKA_01249	hypothetical protein	1405360	1406307	+					1	0	0	0	0	0	0
1253	PFR_JS13-1_1229	Glycosyltransferase, family 2	1406317	1406865	+	PROKKA_01250	Glycosyl transferase family 2	1406317	1406865	+			protein motif:Pfam:PF00535.20		0	0	0	0	0	0	0
1254	PFR_JS13-1_1230	Glycosyltransferase	1406819	1407475	+	PROKKA_01251	GtrA-like protein	1406819	1407475	+			protein motif:Pfam:PF04138.8		0	0	0	0	0	0	0
1255	PFR_JS13-1_1231	Putative phosphoglycerate dehydrogenase	1407465	1408685	-	PROKKA_01252	D-3-phosphoglycerate dehydrogenase	1407465	1408685	-	1.1.1.95	serA	similar to AA sequence:UniProtKB:P0A9T0		1	0	0	0	0	0	0
1256	PFR_JS13-1_1232	Dipeptide ABC transporter ATP-binding protein	1408719	1409546	-	PROKKA_01253	Glutathione import ATP-binding protein GsiA	1408719	1409546	-	3.6.3.-	gsiA_1	similar to AA sequence:UniProtKB:P75796		1	0	0	0	0	0	0
1257	PFR_JS13-1_1233	Oligopeptide transport protein of the ABC	1409539	1410396	-	PROKKA_01254	Oligopeptide transport ATP-binding protein OppD	1409539	1410396	-		oppD	similar to AA sequence:UniProtKB:P24136		1	0	0	0	0	0	0
1258	PFR_JS13-1_1234	Putative oligopeptide ABC transport system	1410398	1411213	-	PROKKA_01255	Glutathione transport system permease protein GsiD	1410398	1411213	-		gsiD	similar to AA sequence:UniProtKB:P75799		1	0	0	0	0	0	0
1259	PFR_JS13-1_1235	Putative glutathione ABC transporter, permease	1411210	1412163	-	PROKKA_01256	Glutathione transport system permease protein GsiC	1411210	1412163	-		gsiC	similar to AA sequence:UniProtKB:P75798		1	0	0	0	0	0	0
1260	PFR_JS13-1_1236	ABC transporter, substrate-binding protein,	1412185	1413708	-	PROKKA_01257	Glutathione-binding protein GsiB precursor	1412185	1413708	-		gsiB	similar to AA sequence:UniProtKB:P75797		1	0	0	0	0	0	0
1261						PROKKA_01258	tRNA-Met(cat)	1413917	1413991	+			COORDINATES:profile:Aragorn:1.2		0					0	0
1262	PFR_JS13-1_1237	Biotin synthase	1414093	1415238	-	PROKKA_01259	Biotin synthase	1414093	1415238	-	2.8.1.6	bioB	similar to AA sequence:UniProtKB:P19206		1	0	0	0	0	0	0
1263	PFR_JS13-1_1238	Hypothetical protein	1415401	1415691	-	PROKKA_01260	hypothetical protein	1415401	1415691	-					1	0	0	0	0	0	0
1264	PFR_JS13-1_1239	Prolyl aminopeptidase	1415860	1417074	-	PROKKA_01261	Proline iminopeptidase	1415860	1417074	-	3.4.11.5	pip_1	similar to AA sequence:UniProtKB:P46547		1	0	0	0	0	0	0
1265	PFR_JS13-1_1240	Peptidase M16 inactive domain protein	1417219	1418493	+	PROKKA_01262	Protease 3 precursor	1417219	1418493	+	3.4.24.55	ptrA	similar to AA sequence:UniProtKB:P05458		1	0	0	0	0	0	0
1266	PFR_JS13-1_1241	Peptidase M16 inactive domain protein	1418490	1419854	+	PROKKA_01263	Peptidase M16 inactive domain protein	1418490	1419854	+			protein motif:Pfam:PF05193.15		1	0	0	0	0	0	0
1267	PFR_JS13-1_1242	UPF0182 protein	1419938	1422877	-	PROKKA_01264	hypothetical protein	1419938	1422877	-			protein motif:CLUSTERS:PRK00068		1	0	0	0	0	0	0
1268	PFR_JS13-1_1243	Hypothetical protein	1422874	1423473	-	PROKKA_01265	hypothetical protein	1422874	1423473	-					1	0	0	0	0	0	0
1269	PFR_JS13-1_1244	Lon protease proteolytic domain protein	1423592	1424635	-	PROKKA_01266	serine endoprotease	1423592	1424635	-			protein motif:CLUSTERS:PRK10942		1	0	0	0	0	0	0
1270	PFR_JS13-1_1245	UbiD family decarboxylase	1424876	1426279	+	PROKKA_01267	hypothetical protein	1424876	1426279	+					1	0	0	0	0	0	0
1271	PFR_JS13-1_1246	Similar to metal-dependent hydrolase	1426311	1426958	-	PROKKA_01268	hypothetical protein	1426311	1426958	-					1	0	0	0	0	0	0
1272	PFR_JS13-1_1247	Hypothetical protein	1427395	1427556	+	PROKKA_01269	hypothetical protein	1427395	1427556	+					1	0	0	0	0	0	0
1273	PFR_JS13-1_1248	Hypothetical protein	1427713	1428840	+	PROKKA_01270	hypothetical protein	1427713	1428840	+					1	0	0	0	0	0	0
1274	PFR_JS13-1_1249	HRDC domain protein	1428897	1431053	-	PROKKA_01271	ATP-dependent DNA helicase UvrD2	1428897	1431053	-	3.6.4.12	uvrD2	similar to AA sequence:UniProtKB:P64320		1	0	0	0	0	0	0
1275	PFR_JS13-1_1250	Exonuclease subunit V gamma recC	1431156	1434530	+	PROKKA_01272	RecBCD enzyme subunit RecC	1431156	1434530	+	3.1.11.5	recC	similar to AA sequence:UniProtKB:P07648		1	0	0	0	0	0	0
1276	PFR_JS13-1_1251	Putative exodeoxyribonuclease V, beta subunit	1434527	1437889	+	PROKKA_01273	RecBCD enzyme subunit RecB	1434527	1437889	+	3.1.11.5	recB	similar to AA sequence:UniProtKB:P08394		1	0	0	0	0	0	0
1277	PFR_JS13-1_1252	Exonuclease subunit V alpha recD	1437876	1439729	+	PROKKA_01274	RecBCD enzyme subunit RecD	1437876	1439729	+	3.1.11.5	recD	similar to AA sequence:UniProtKB:P04993		1	0	0	0	0	0	0
1278	PFR_JS13-1_1253	Hydrolase, NUDIX family	1439781	1440671	-	PROKKA_01275	NADH pyrophosphatase	1439781	1440671	-	3.6.1.22	nudC	similar to AA sequence:UniProtKB:P32664		1	0	0	0	0	0	0
1279	PFR_JS13-1_1254	ATP-dependent DNA helicase	1440681	1444037	-	PROKKA_01276	ATP-dependent DNA helicase PcrA	1440681	1444037	-	3.6.4.12	pcrA	similar to AA sequence:UniProtKB:Q53727		1	0	0	0	0	0	0
1280	PFR_JS13-1_1255	ATP-dependent DNA helicase	1444034	1447405	-	PROKKA_01277	ATP-dependent DNA helicase UvrD1	1444034	1447405	-	3.6.4.12	uvrD1_1	similar to AA sequence:UniProtKB:P0A5A3		1	0	0	0	0	0	0
1281	PFR_JS13-1_1256	Cold shock-like protein CspA	1447745	1447951	+	PROKKA_01278	Cold shock-like protein 7.0	1447745	1447951	+			similar to AA sequence:UniProtKB:Q01761		1	0	0	0	0	0	0
1282	PFR_JS13-1_1257	Serine/threonine phosphatase stp	1448117	1448989	+	PROKKA_01279	Serine/threonine phosphatase stp	1448117	1448989	+	3.1.3.16	stp_1	similar to AA sequence:UniProtKB:Q8Y678		1	0	0	0	0	0	0
1283	PFR_JS13-1_1258	Hypothetical protein	1449046	1449330	+	PROKKA_01280	hypothetical protein	1449046	1449330	+					1	0	0	0	0	0	0
1284	PFR_JS13-1_1259	Hydroxylase for synthesis of	1449517	1450272	-	PROKKA_01281	hypothetical protein	1449517	1450272	-					1	0	0	0	0	0	0
1285	PFR_JS13-1_1260	DEAD/DEAH box helicase	1450548	1452053	+	PROKKA_01282	DEAD-box ATP-dependent RNA helicase CshA	1450548	1452053	+	3.6.4.13	cshA	similar to AA sequence:UniProtKB:P96614		1	0	0	0	0	0	0
1286	PFR_JS13-1_1261	Tryptophanyl-tRNA synthetase II	1452191	1453363	-	PROKKA_01283	Tryptophan--tRNA ligase 2	1452191	1453363	-	6.1.1.2	trpS2	similar to AA sequence:UniProtKB:Q9RVD6		1	0	0	0	0	0	0
1287	PFR_JS13-1_1262	PHP domain protein	1453332	1454213	-	PROKKA_01284	hypothetical protein	1453332	1454213	-			protein motif:CLUSTERS:PRK06361		1	0	0	0	0	0	0
1288	PFR_JS13-1_1263	Hypothetical protein	1454345	1454821	+	PROKKA_01285	hypothetical protein	1454345	1454821	+					1	0	0	0	0	0	0
1289	PFR_JS13-1_1264	Hypothetical protein	1454880	1455083	-	PROKKA_01286	hypothetical protein	1454880	1455083	-					1	0	0	0	0	0	0
1290	PFR_JS13-1_1265	Hypothetical protein	1455085	1455594	-	PROKKA_01287	hypothetical protein	1455085	1455594	-					0	0	0	0	0	0	0
1291	PFR_JS13-1_1266	Hypothetical protein	1455675	1456217	+	PROKKA_01288	hypothetical protein	1455675	1456217	+					1	0	0	0	0	0	0
1292	PFR_JS13-1_1267	Protein translocase subunit SecA	1456257	1459106	-	PROKKA_01289	preprotein translocase subunit SecA	1456257	1459106	-			protein motif:CLUSTERS:PRK12904		1	0	0	0	0	0	0
1293	PFR_JS13-1_1268	Putative ribosomal S30AE, sigma 54 modulation	1459351	1459947	-	PROKKA_01290	Light-repressed protein A	1459351	1459947	-		lrtA	similar to AA sequence:UniProtKB:P47908		1	0	0	0	0	0	0
1294	PFR_JS13-1_1269	Phosphoribosyl transferase domain protein	1460103	1460912	-	PROKKA_01291	DNA utilization protein GntX	1460103	1460912	-			protein motif:CLUSTERS:PRK11595		1	0	0	0	0	0	0
1295	PFR_JS13-1_1270	DNA-binding response regulator MtrA	1460994	1461734	-	PROKKA_01292	DNA-binding response regulator MtrA	1460994	1461734	-		mtrA	similar to AA sequence:UniProtKB:P0A5Z4		1	0	0	0	0	0	0
1296	PFR_JS13-1_1271	Conserved protein, DUF179	1461870	1462436	-	PROKKA_01293	hypothetical protein	1461870	1462436	-			protein motif:CLUSTERS:PRK00228		1	0	0	0	0	0	0
1297						PROKKA_01294	transfer-messenger RNA, SsrA	1462650	1463017	-		ssrA	COORDINATES:profile:Aragorn:1.2		0					0	0
1298	PFR_JS13-1_1272	Hypothetical protein	1463142	1463783	-	PROKKA_01295	hypothetical protein	1463142	1463783	-					1	0	0	0	0	0	0
1299	PFR_JS13-1_1273	TmRNA-binding protein SmpB	1463873	1464355	-	PROKKA_01296	SsrA-binding protein	1463873	1464355	-		smpB	similar to AA sequence:UniProtKB:A0QU63		1	0	0	0	0	0	0
1300	PFR_JS13-1_1274	MutG family lantibiotic protection ABC	1464489	1466420	-	PROKKA_01297	hypothetical protein	1464489	1466420	-					1	0	0	0	0	0	0
1301	PFR_JS13-1_1275	Hypothetical protein	1466605	1467924	-	PROKKA_01298	Murein DD-endopeptidase MepM	1466605	1467924	-	3.4.24.-	mepM_3	similar to AA sequence:UniProtKB:P0AFS9		1	0	0	0	0	0	0
1302	PFR_JS13-1_1276	Efflux ABC transporter, permease protein	1467991	1468908	-	PROKKA_01299	Cell division protein FtsX	1467991	1468908	-		ftsX	similar to AA sequence:UniProtKB:A5U7B6		1	0	0	0	0	0	0
1303	PFR_JS13-1_1277	Cell division ATP-binding protein FtsE	1468947	1469633	-	PROKKA_01300	Cell division ATP-binding protein FtsE	1468947	1469633	-		ftsE	similar to AA sequence:UniProtKB:O34814		1	0	0	0	0	0	0
1304	PFR_JS13-1_1278	Peptide chain release factor 2	1469785	1470894	-	PROKKA_01301	Peptide chain release factor 2	1469785	1470894	-		prfB	similar to AA sequence:UniProtKB:A0QU58		1	0	0	0	0	0	0
1305	PFR_JS13-1_1279	YqeY family protein	1470989	1471450	+	PROKKA_01302	Yqey-like protein	1470989	1471450	+			protein motif:Pfam:PF09424.4		1	0	0	0	0	0	0
1306						PROKKA_01303	tRNA-Val(tac)	1471491	1471566	+			COORDINATES:profile:Aragorn:1.2		0					0	0
1307	PFR_JS13-1_1280	Fructosamine kinase	1471624	1472616	-	PROKKA_01304	Fructosamine kinase	1471624	1472616	-			protein motif:Pfam:PF03881.8		1	0	0	0	0	0	0
1308	PFR_JS13-1_1281	4-aminobutyrate aminotransferase gabT	1472734	1474071	+	PROKKA_01305	4-aminobutyrate aminotransferase PuuE	1472734	1474071	+	2.6.1.19	puuE	similar to AA sequence:UniProtKB:P50457		1	0	0	0	0	0	0
1309	PFR_JS13-1_1282	Aliphatic amidase	1474250	1475110	-	PROKKA_01306	Aliphatic amidase	1474250	1475110	-	3.5.1.4	amiE	similar to AA sequence:UniProtKB:P11436		1	0	0	0	0	0	0
1310	PFR_JS13-1_1283	Putrescine importer	1475107	1476498	-	PROKKA_01307	Putrescine importer PuuP	1475107	1476498	-		puuP	similar to AA sequence:UniProtKB:P76037		1	0	0	0	0	0	0
1311	PFR_JS13-1_1284	Hsp20/alpha crystallin family protein	1476771	1477223	-	PROKKA_01308	18 kDa heat shock protein	1476771	1477223	-			similar to AA sequence:UniProtKB:Q53595		1	0	0	0	0	0	0
1312	PFR_JS13-1_1285	Putative ABC transport system	1477473	1479266	+	PROKKA_01309	putative ABC transporter ATP-binding protein	1477473	1479266	+			similar to AA sequence:UniProtKB:Q9WYC4		1	0	0	0	0	0	0
1313	PFR_JS13-1_1286	PF11253 family protein	1479301	1479726	-	PROKKA_01310	hypothetical protein	1479301	1479726	-					1	0	0	0	0	0	0
1314	PFR_JS13-1_1287	Hypothetical protein	1479731	1479865	-	PROKKA_01311	hypothetical protein	1479731	1479865	-					0	0	0	0	0	0	0
1315	PFR_JS13-1_1288	Pyruvate dehydrogenase E1 component	1479828	1482575	-	PROKKA_01312	Pyruvate dehydrogenase E1 component	1479828	1482575	-	1.2.4.1	aceE	similar to AA sequence:UniProtKB:A0R0B0		1	0	0	0	0	0	0
1316	PFR_JS13-1_1289	Aromatic-amino-acid transaminase	1482830	1484026	+	PROKKA_01313	Aromatic-amino-acid aminotransferase	1482830	1484026	+	2.6.1.57	tyrB	similar to AA sequence:UniProtKB:P04693		1	0	0	0	0	0	0
1317	PFR_JS13-1_1290	Transcriptional regulator, PucR family	1484112	1485326	+	PROKKA_01314	Purine catabolism regulatory protein	1484112	1485326	+		pucR_2	similar to AA sequence:UniProtKB:O32138		1	0	0	0	0	0	0
1318	PFR_JS13-1_1291	Malonyl CoA:acyl carrier protein	1485483	1486439	+	PROKKA_01315	Malonyl CoA-acyl carrier protein transacylase	1485483	1486439	+	2.3.1.39	fabD	similar to AA sequence:UniProtKB:P63458		1	0	0	0	0	0	0
1319	PFR_JS13-1_1292	3-oxoacyl-[acyl-carrier-protein] synthase 3 2	1486443	1487447	+	PROKKA_01316	3-oxoacyl-[acyl-carrier-protein] synthase 3	1486443	1487447	+	2.3.1.180	fabH	similar to AA sequence:UniProtKB:Q9F6D4		1	0	0	0	0	0	0
1320	PFR_JS13-1_1293	Acyl carrier protein	1487509	1487760	+	PROKKA_01317	Acyl carrier protein	1487509	1487760	+		acpP	similar to AA sequence:UniProtKB:P80921		1	0	0	0	0	0	0
1321	PFR_JS13-1_1294	3-oxoacyl-[acyl-carrier-protein] synthase II	1487812	1489071	+	PROKKA_01318	3-oxoacyl-[acyl-carrier-protein] synthase 2	1487812	1489071	+	2.3.1.179	fabF	similar to AA sequence:UniProtKB:P73283		1	0	0	0	0	0	0
1322	PFR_JS13-1_1295	PF11343 family protein	1489239	1489733	-	PROKKA_01319	hypothetical protein	1489239	1489733	-					1	0	0	0	0	0	0
1323	PFR_JS13-1_1296	Peptidase, S9C (Acylaminoacyl-peptidase) family	1489884	1491863	+	PROKKA_01320	Prolyl tripeptidyl peptidase precursor	1489884	1491863	+	3.4.14.12	ptpA_1	similar to AA sequence:UniProtKB:Q7MUW6		1	0	0	0	0	0	0
1324	PFR_JS13-1_1297	Pyridoxal phosphate enzyme, YggS family	1491912	1492664	-	PROKKA_01321	hypothetical protein	1491912	1492664	-			protein motif:Pfam:PF01168.14	Alanine racemase, N-terminal domain	1	0	0	0	0	0	0
1325	PFR_JS13-1_1298	Von Willebrand factor type A domain protein	1492661	1493626	-	PROKKA_01322	von Willebrand factor type A domain protein	1492661	1493626	-			protein motif:Pfam:PF00092.22		1	0	0	0	0	0	0
1326	PFR_JS13-1_1299	Von Willebrand factor type A domain protein	1493626	1494600	-	PROKKA_01323	von Willebrand factor type A domain protein	1493626	1494600	-			protein motif:Pfam:PF00092.22		1	0	0	0	0	0	0
1327	PFR_JS13-1_1300	Protein containing DUF58	1494600	1495664	-	PROKKA_01324	hypothetical protein	1494600	1495664	-					1	0	0	0	0	0	0
1328	PFR_JS13-1_1301	Transcriptional regulator moxR1	1495661	1496713	-	PROKKA_01325	ATPase family associated with various cellular activities (AAA)	1495661	1496713	-			protein motif:Pfam:PF07726.5		1	0	0	0	0	0	0
1329	PFR_JS13-1_1302	Hypothetical protein	1496958	1497884	+	PROKKA_01326	hypothetical protein	1496958	1497884	+					1	0	0	0	0	0	0
1330	PFR_JS13-1_1303	HAD-superfamily hydrolase, subfamily IIB	1497892	1498734	+	PROKKA_01327	Putative phosphatase	1497892	1498734	+	3.1.3.-		similar to AA sequence:UniProtKB:Q5XD45		1	0	0	0	0	0	0
1331	PFR_JS13-1_1304	Mercuric reductase/transcriptional regulator,	1498755	1500185	-	PROKKA_01328	Dihydrolipoyl dehydrogenase	1498755	1500185	-	1.8.1.4	lpd	similar to AA sequence:UniProtKB:P85207		1	0	0	0	0	0	0
1332	PFR_JS13-1_1305	Predicted metal-binding protein (DUF2284)	1500594	1501235	+	PROKKA_01329	hypothetical protein	1500594	1501235	+					1	0	0	0	0	0	0
1333	PFR_JS13-1_1306	TIGR00245 family protein	1501243	1502001	+	PROKKA_01330	hypothetical protein	1501243	1502001	+					0	0	0	0	0	0	0
1334	PFR_JS13-1_1307	Putative dGTPase	1502018	1503151	-	PROKKA_01331	Deoxyguanosinetriphosphate triphosphohydrolase	1502018	1503151	-	3.1.5.1	dgt	similar to AA sequence:UniProtKB:Q59827		1	0	0	0	0	0	0
1335	PFR_JS13-1_1308	TIM-barrel protein, nifR3 family	1503214	1504401	-	PROKKA_01332	tRNA-dihydrouridine synthase C	1503214	1504401	-	1.-.-.-	dusC	similar to AA sequence:UniProtKB:P33371		1	0	0	0	0	0	0
1336	PFR_JS13-1_1309	Succinate dehydrogenase/fumarate reductase	1504478	1505236	-	PROKKA_01333	Fumarate reductase iron-sulfur subunit	1504478	1505236	-	1.3.99.1	frdB_2	similar to AA sequence:UniProtKB:P0AC47		1	0	0	0	0	0	0
1337	PFR_JS13-1_1310	Succinate dehydrogenase flavoprotein subunit	1505233	1507317	-	PROKKA_01334	Fumarate reductase flavoprotein subunit	1505233	1507317	-	1.3.5.4	frdA_2	similar to AA sequence:UniProtKB:P17412		1	0	0	0	0	0	0
1338	PFR_JS13-1_1311	Succinate dehydrogenase cytochrome B subunit,	1507314	1508069	-	PROKKA_01335	Succinate dehydrogenase/Fumarate reductase transmembrane subunit	1507314	1508069	-			protein motif:Pfam:PF01127.16		1	0	0	0	0	0	0
1339	PFR_JS13-1_1312	NUDIX hydrolase	1508317	1509069	-	PROKKA_01336	bifunctional nicotinamide mononucleotide adenylyltransferase/ADP-ribose pyrophosphatase	1508317	1509069	-			protein motif:CLUSTERS:PRK05379		1	0	0	0	0	0	0
1340	PFR_JS13-1_1313	Quinolinate synthase A	1509136	1510116	+	PROKKA_01337	Quinolinate synthase A	1509136	1510116	+	2.5.1.72	nadA	similar to AA sequence:UniProtKB:P11458		1	0	0	0	0	0	0
1341	PFR_JS13-1_1314	L-aspartate oxidase NadB	1510113	1511795	+	PROKKA_01338	L-aspartate oxidase	1510113	1511795	+	1.4.3.16	nadB_2	similar to AA sequence:UniProtKB:P10902		1	0	0	0	0	0	0
1342	PFR_JS13-1_1315	Nicotinate-nucleotide pyrophosphatase nadC	1511792	1512712	+	PROKKA_01339	Nicotinate-nucleotide pyrophosphorylase [carboxylating]	1511792	1512712	+	2.4.2.19	nadC	similar to AA sequence:UniProtKB:O06594		1	0	0	0	0	0	0
1343	PFR_JS13-1_1316	Glycyl-tRNA synthetase glyS	1512837	1514225	-	PROKKA_01340	Glycine--tRNA ligase	1512837	1514225	-	6.1.1.14	glyQS	similar to AA sequence:UniProtKB:P99129		1	0	0	0	0	0	0
1344	PFR_JS13-1_1317	Metal transport system ABC transporter	1514458	1515405	+	PROKKA_01341	High-affinity zinc uptake system binding-protein ZnuA precursor	1514458	1515405	+		znuA	similar to AA sequence:UniProtKB:O34966		1	0	0	0	0	0	0
1345	PFR_JS13-1_1318	Metal transport ABC transporter	1515500	1516288	+	PROKKA_01342	High-affinity zinc uptake system ATP-binding protein ZnuC	1515500	1516288	+	3.6.3.-	znuC	similar to AA sequence:UniProtKB:O34946		1	0	0	0	0	0	0
1346	PFR_JS13-1_1319	Metal transport ABC transporter	1516290	1517291	+	PROKKA_01343	High-affinity zinc uptake system membrane protein ZnuB	1516290	1517291	+		znuB	similar to AA sequence:UniProtKB:O34610		1	0	0	0	0	0	0
1347	PFR_JS13-1_1320	Fe(3 ) uptake regulation protein	1517288	1517776	+	PROKKA_01344	Zinc uptake regulation protein	1517288	1517776	+		zur	similar to AA sequence:UniProtKB:O05839		1	0	0	0	0	0	0
1348	PFR_JS13-1_1321	Phage integrase	1518029	1518703	+	PROKKA_01345	Phage integrase family protein	1518029	1518703	+			protein motif:Pfam:PF00589.16		1	0	0	0	0	0	0
1349	PFR_JS13-1_1322	CoA-dependent propionaldehyde dehydrogenase	1518933	1520342	-	PROKKA_01346	Aldehyde-alcohol dehydrogenase	1518933	1520342	-		adhE	similar to AA sequence:UniProtKB:P0A9Q7		0	0	0	0	0	0	0
1350	PFR_JS13-1_1323	PduO	1520339	1521424	-	PROKKA_01347	Cob(I)yrinic acid a,c-diamide adenosyltransferase	1520339	1521424	-	2.5.1.17	yvqK	similar to AA sequence:UniProtKB:O34899		0	0	0	0	0	0	0
1351	PFR_JS13-1_1324	Propanediol utilization protein PduN	1521427	1521699	-	PROKKA_01348	Carbon dioxide concentrating mechanism protein CcmL	1521427	1521699	-		ccmL	similar to AA sequence:UniProtKB:P72759		0	0	0	0	0	0	0
1352	PFR_JS13-1_1325	Ethanolamine utilization flavoprotein	1521701	1522585	-	PROKKA_01349	Flavoprotein	1521701	1522585	-			protein motif:Pfam:PF02441.13		0	0	0	0	0	0	0
1353	PFR_JS13-1_1326	Ethanolamine utilization protein EutJ	1522582	1523439	-	PROKKA_01350	Chaperone protein DnaK	1522582	1523439	-		dnaK_1	similar to AA sequence:UniProtKB:A0QQC8		0	0	0	0	0	0	0
1354	PFR_JS13-1_1327	Propanediol utilization protein PduJ	1523586	1523864	-	PROKKA_01351	Propanediol utilization protein PduA	1523586	1523864	-		pduA_1	similar to AA sequence:UniProtKB:P0A1C7		0	0	0	0	0	0	0
1355	PFR_JS13-1_1328	Propanediol utilization protein PduK	1523909	1524526	-	PROKKA_01352	hypothetical protein	1523909	1524526	-			similar to AA sequence:UniProtKB:P72761	Carbon dioxide-concentrating mechanism protein CcmK homolog 2	0	0	0	0	0	0	0
1356	PFR_JS13-1_1329	Glycerol dehydratase reactivation factor DhaG	1524543	1524887	-	PROKKA_01353	hypothetical protein	1524543	1524887	-					0	0	0	0	0	0	0
1357	PFR_JS13-1_1330	Propanediol dehydratase reactivation factor large	1524884	1525621	-	PROKKA_01354	Diol dehydratase-reactivating factor alpha subunit	1524884	1525621	-		ddrA_1	similar to AA sequence:UniProtKB:O68195		0	0	0	0	0	0	0
1358	PFR_JS13-1_1331	Propanediol dehydratase reactivation factor large	1525655	1526698	-	PROKKA_01355	Diol dehydratase-reactivating factor alpha subunit	1525655	1526698	-		ddrA_2	similar to AA sequence:UniProtKB:O68195		0	0	0	0	0	0	0
1359	PFR_JS13-1_1332	Dehydratase small subunit	1526734	1527267	-	PROKKA_01356	Propanediol dehydratase small subunit	1526734	1527267	-	4.2.1.28	pduE	similar to AA sequence:UniProtKB:O31042		0	0	0	0	0	0	0
1360	PFR_JS13-1_1333	Dehydratase medium subunit	1527276	1527959	-	PROKKA_01357	Propanediol dehydratase medium subunit	1527276	1527959	-	4.2.1.28	pduD	similar to AA sequence:UniProtKB:O31041		0	0	0	0	0	0	0
1361	PFR_JS13-1_1334	Glycerol dehydratase large subunit	1527970	1529631	-	PROKKA_01358	Glycerol dehydratase large subunit	1527970	1529631	-	4.2.1.30	dhaB	similar to AA sequence:UniProtKB:P45514		0	0	0	0	0	0	0
1362	PFR_JS13-1_1335	Propanediol utilization protein PduB	1529646	1530455	-	PROKKA_01359	Propanediol utilization protein PduB	1529646	1530455	-		pduB	similar to AA sequence:UniProtKB:P37449		0	0	0	0	0	0	0
1363	PFR_JS13-1_1336	Carbon dioxide concentrating	1530470	1530754	-	PROKKA_01360	Propanediol utilization protein PduA	1530470	1530754	-		pduA_2	similar to AA sequence:UniProtKB:P0A1C7		0	0	0	0	0	0	0
1364	PFR_JS13-1_1337	Putative insertion element ISCmi2 transposase	1530932	1531927	+	PROKKA_01361	Integrase core domain protein	1530932	1531927	+			protein motif:Pfam:PF00665.20		0	0	0	0	0	0	0
1365	PFR_JS13-1_1338	PduU protein	1532176	1532517	+	PROKKA_01362	Propanediol utilization protein PduU	1532176	1532517	+		pduU	similar to AA sequence:UniProtKB:P0A1D1		0	0	0	0	0	0	0
1366	PFR_JS13-1_1339	Ethanolamine utilization protein, EutP	1532514	1532939	+	PROKKA_01363	Propanediol utilization protein PduV	1532514	1532939	+		pduV	similar to AA sequence:UniProtKB:Q9XDM6		0	0	0	0	0	0	0
1367	PFR_JS13-1_1340	PduQ	1532992	1534122	-	PROKKA_01364	NAD-dependent methanol dehydrogenase	1532992	1534122	-	1.1.1.244	mdh_1	similar to AA sequence:UniProtKB:P31005		0	0	0	0	0	0	0
1368	PFR_JS13-1_1341	Transcriptional regulator	1534079	1535296	-	PROKKA_01365	Regulatory protein SoxS	1534079	1535296	-		soxS	similar to AA sequence:UniProtKB:P0A9E2		0	0	0	0	0	0	0
1369	PFR_JS13-1_1342	Hypothetical protein	1535303	1535467	-	PROKKA_01366	putative histidine kinase sensor domain protein	1535303	1535467	-			protein motif:Pfam:PF10114.3		0	0	0	0	0	0	0
1370	PFR_JS13-1_1343	DNA repair protein RecO	1535631	1536374	-	PROKKA_01367	DNA repair protein RecO	1535631	1536374	-		recO	similar to AA sequence:UniProtKB:P42095		1	0	0	0	0	0	0
1371	PFR_JS13-1_1344	Isoprenyl transferase 2	1536558	1537247	+	PROKKA_01368	Trans,polycis-polyprenyl diphosphate synthase ((2Z,6E)-farnesyl diphosphate specific)	1536558	1537247	+	2.5.1.88		similar to AA sequence:UniProtKB:Q47RM6		1	0	0	0	0	0	0
1372	PFR_JS13-1_1345	Protein of hypothetical function DUF488	1537308	1537670	+	PROKKA_01369	hypothetical protein	1537308	1537670	+					1	0	0	0	0	0	0
1373	PFR_JS13-1_1346	2-isopropylmalate synthase LeuA	1537727	1539493	-	PROKKA_01370	2-isopropylmalate synthase	1537727	1539493	-	2.3.3.13	leuA_2	similar to AA sequence:UniProtKB:P96420		1	0	0	0	0	0	0
1374	PFR_JS13-1_1347	Amidohydrolase family protein	1539725	1541230	+	PROKKA_01371	N-substituted formamide deformylase precursor	1539725	1541230	+	3.5.1.91	nfdA	similar to AA sequence:UniProtKB:Q68AP4		0	0	0	0	0	0	0
1375	PFR_JS13-1_1348	Hypothetical protein	1541360	1541494	-	PROKKA_01372	hypothetical protein	1541360	1541494	-					1	0	0	0	0	0	0
1376	PFR_JS13-1_1349	Hypothetical protein	1541605	1542213	-	PROKKA_01373	hypothetical protein	1541605	1542213	-					1	0	0	0	0	0	0
1377	PFR_JS13-1_1350	GTPase Era	1542263	1543207	-	PROKKA_01374	GTPase Era	1542263	1543207	-		era	similar to AA sequence:UniProtKB:P0A562		1	0	0	0	0	0	0
1378	PFR_JS13-1_1351	CBS domain pair protein	1543200	1544510	-	PROKKA_01375	Magnesium and cobalt efflux protein CorC	1543200	1544510	-		corC	similar to AA sequence:UniProtKB:P0A2L3		1	0	0	0	0	0	0
1379	PFR_JS13-1_1352	Probable rRNA maturation factor	1544664	1545122	-	PROKKA_01376	Endoribonuclease YbeY	1544664	1545122	-	3.1.-.-	ybeY	similar to AA sequence:UniProtKB:A0R0T0		1	0	0	0	0	0	0
1380	PFR_JS13-1_1353	PhoH family protein	1545162	1546169	-	PROKKA_01377	PhoH-like protein	1545162	1546169	-		ybeZ	similar to AA sequence:UniProtKB:P0A9K3		1	0	0	0	0	0	0
1381	PFR_JS13-1_1354	Inner membrane metabolite transport protein YhjE	1546301	1547683	-	PROKKA_01378	Inner membrane metabolite transport protein YhjE	1546301	1547683	-		yhjE	similar to AA sequence:UniProtKB:P37643		1	0	0	0	0	0	0
1382	PFR_JS13-1_1355	Hypothetical protein	1547852	1548343	-	PROKKA_01379	hypothetical protein	1547852	1548343	-					0	0	0	0	0	0	0
1383	PFR_JS13-1_1356	Prolyl aminopeptidase	1548399	1549457	-	PROKKA_01380	Proline iminopeptidase	1548399	1549457	-	3.4.11.5	pip_2	similar to AA sequence:UniProtKB:P52279		1	0	0	0	0	0	0
1384	PFR_JS13-1_1357	Hypothetical protein	1549539	1550090	-	PROKKA_01381	hypothetical protein	1549539	1550090	-					1	0	0	0	0	0	0
1385	PFR_JS13-1_1358	TRNA-guanine transglycosylase	1550204	1551472	-	PROKKA_01382	Queuine tRNA-ribosyltransferase	1550204	1551472	-	2.4.2.29	tgt	similar to AA sequence:UniProtKB:P66905		1	0	0	0	0	0	0
1386	PFR_JS13-1_1359	Putative Tat (Twin-arginine translocation)	1551592	1552920	+	PROKKA_01383	Calcineurin-like phosphoesterase	1551592	1552920	+			protein motif:Pfam:PF00149.22		1	0	0	0	0	0	0
1387	PFR_JS13-1_1360	Ribosomal RNA small subunit methyltransferase E	1552909	1553658	-	PROKKA_01384	Ribosomal RNA small subunit methyltransferase E	1552909	1553658	-	2.1.1.193	rsmE	similar to AA sequence:UniProtKB:P0AGL7		1	0	0	0	0	0	0
1388	PFR_JS13-1_1361	Chaperone protein DnaJ 2	1553655	1554863	-	PROKKA_01385	Chaperone protein DnaJ	1553655	1554863	-		dnaJ_1	similar to AA sequence:UniProtKB:Q6RSN5		1	0	0	0	0	0	0
1389	PFR_JS13-1_1362	Heat-inducible transcription repressor hrcA	1554876	1555886	-	PROKKA_01386	Heat-inducible transcription repressor HrcA	1554876	1555886	-		hrcA	similar to AA sequence:UniProtKB:A0R0T9		1	0	0	0	0	0	0
1390	PFR_JS13-1_1363	Inositol monophosphatase family protein	1556145	1556921	-	PROKKA_01387	Inositol-1-monophosphatase	1556145	1556921	-	3.1.3.25	suhB	similar to AA sequence:UniProtKB:O33832		1	0	0	0	0	0	0
1391	PFR_JS13-1_1364	PF11296 family protein	1556999	1557880	-	PROKKA_01388	hypothetical protein	1556999	1557880	-					1	0	0	0	0	0	0
1392	PFR_JS13-1_1365	Putative coproporphyrinogen dehydrogenase	1557975	1559174	-	PROKKA_01389	Oxygen-independent coproporphyrinogen-III oxidase 1	1557975	1559174	-	1.3.99.22	hemN	similar to AA sequence:UniProtKB:P54304		1	0	0	0	0	0	0
1393	PFR_JS13-1_1366	Elongation factor 4	1559177	1561006	-	PROKKA_01390	Elongation factor 4	1559177	1561006	-	3.6.5.-	lepA	similar to AA sequence:UniProtKB:Q2FXY7		1	0	0	0	0	0	0
1394	PFR_JS13-1_1367	Hypothetical protein	1561307	1561927	-	PROKKA_01391	hypothetical protein	1561307	1561927	-					1	0	0	0	0	0	0
1395	PFR_JS13-1_1368	30S ribosomal protein S20	1562182	1562442	+	PROKKA_01392	30S ribosomal protein S20	1562182	1562442	+		rpsT	similar to AA sequence:UniProtKB:A0R102		1	0	0	0	0	0	0
1396	PFR_JS13-1_1369	Hypothetical protein	1562576	1563238	+	PROKKA_01393	hypothetical protein	1562576	1563238	+					1	0	0	0	0	0	0
1397	PFR_JS13-1_1370	DNA polymerase III, delta subunit	1563252	1564250	-	PROKKA_01394	hypothetical protein	1563252	1564250	-			protein motif:CLUSTERS:PRK07914		1	0	0	0	0	0	0
1398	PFR_JS13-1_1371	DNA internalization competence protein	1564333	1566654	-	PROKKA_01395	ComEC family competence protein	1564333	1566654	-			protein motif:CLUSTERS:PRK11539		0	0	0	0	0	0	0
1399	PFR_JS13-1_1372	Putative competence protein ComEA	1566773	1567684	-	PROKKA_01396	ComE operon protein 1	1566773	1567684	-		comEA	similar to AA sequence:UniProtKB:P39694		1	0	0	0	0	0	0
1400	PFR_JS13-1_1373	Malic enzyme, NAD binding domain protein	1567869	1569623	-	PROKKA_01397	putative NAD-dependent malic enzyme 2	1567869	1569623	-	1.1.1.38	maeA	similar to AA sequence:UniProtKB:P45868		1	0	0	0	0	0	0
1401	PFR_JS13-1_1374	Dihydroorotase	1569641	1570933	-	PROKKA_01398	Dihydroorotase	1569641	1570933	-	3.5.2.3	pyrC	similar to AA sequence:UniProtKB:Q81WF0		1	0	0	0	0	0	0
1402	PFR_JS13-1_1375	Leucine--tRNA ligase (Precursor)	1570990	1573518	-	PROKKA_01399	Leucine--tRNA ligase	1570990	1573518	-	6.1.1.4	leuS	similar to AA sequence:UniProtKB:Q9JXT2		1	0	0	0	0	0	0
1403	PFR_JS13-1_1376	Hypothetical protein	1573835	1574893	-	PROKKA_01400	hypothetical protein	1573835	1574893	-					1	0	0	0	0	0	0
1404	PFR_JS13-1_1377	Hypothetical protein	1575062	1575802	+	PROKKA_01401	hypothetical protein	1575062	1575802	+					1	0	0	0	0	0	0
1405						PROKKA_01402	tRNA-Ala(ggc)	1575905	1575978	+			COORDINATES:profile:Aragorn:1.2		0					0	0
1406	PFR_JS13-1_1378	NADPH-dependent glutamate synthase beta chain and	1576105	1577025	-	PROKKA_01403	NAD dependent epimerase/dehydratase family protein	1576105	1577025	-			protein motif:Pfam:PF01370.15		1	0	0	0	0	0	0
1407	PFR_JS13-1_1379	Hypothetical protein	1577140	1577577	-	PROKKA_01404	hypothetical protein	1577140	1577577	-					0	0	0	0	0	0	0
1408	PFR_JS13-1_1380	Phosphoglycerate mutase family protein	1577637	1578245	-	PROKKA_01405	Glucosyl-3-phosphoglycerate phosphatase	1577637	1578245	-	3.1.3.-	gpgP_2	similar to AA sequence:UniProtKB:P71724		1	0	0	0	0	0	0
1409	PFR_JS13-1_1381	Ribosome-associated protein, iojap family	1578245	1578628	-	PROKKA_01406	Ribosomal silencing factor RsfS	1578245	1578628	-		rsfS	similar to AA sequence:UniProtKB:Q9KD89		1	0	0	0	0	0	0
1410	PFR_JS13-1_1382	Nicotinate (Nicotinamide) nucleotide	1578625	1579395	-	PROKKA_01407	Nicotinate-nucleotide adenylyltransferase	1578625	1579395	-	2.7.7.18	nadD	similar to AA sequence:UniProtKB:P54455		1	0	0	0	0	0	0
1411	PFR_JS13-1_1383	Gamma-glutamyl phosphate reductase 2	1579469	1580713	-	PROKKA_01408	Gamma-glutamyl phosphate reductase	1579469	1580713	-	1.2.1.41	proA	similar to AA sequence:UniProtKB:Q9WYC9		1	0	0	0	0	0	0
1412	PFR_JS13-1_1384	Hypothetical protein	1580720	1581388	-	PROKKA_01409	hypothetical protein	1580720	1581388	-					1	0	0	0	0	0	0
1413	PFR_JS13-1_1385	Glutamate 5-kinase ProB	1581421	1582590	-	PROKKA_01410	Glutamate 5-kinase	1581421	1582590	-	2.7.2.11	proB	similar to AA sequence:UniProtKB:A0R148		1	0	0	0	0	0	0
1414	PFR_JS13-1_1386	GTPase obg	1582583	1584184	-	PROKKA_01411	GTPase Obg	1582583	1584184	-		obg	similar to AA sequence:UniProtKB:P95722		1	0	0	0	0	0	0
1415	PFR_JS13-1_1387	50S ribosomal protein L27	1584333	1584596	-	PROKKA_01412	50S ribosomal protein L27	1584333	1584596	-		rpmA	similar to AA sequence:UniProtKB:A0R150		1	0	0	0	0	0	0
1416	PFR_JS13-1_1388	50S ribosomal protein L21	1584610	1584957	-	PROKKA_01413	50S ribosomal protein L21	1584610	1584957	-		rplU	similar to AA sequence:UniProtKB:A0R151		1	0	0	0	0	0	0
1417	PFR_JS13-1_1389	Hypothetical protein	1585154	1587940	-	PROKKA_01414	Ribonuclease G	1585154	1587940	-	3.1.26.-	rng	similar to AA sequence:UniProtKB:P0A9J0		1	0	0	0	0	0	0
1418	PFR_JS13-1_1390	Radical SAM domain protein	1588194	1588946	-	PROKKA_01415	hypothetical protein	1588194	1588946	-					1	0	0	0	0	0	0
1419	PFR_JS13-1_1391	Hypothetical protein	1589010	1589465	-	PROKKA_01416	MarR family protein	1589010	1589465	-			protein motif:Pfam:PF12802.1		1	0	0	0	0	0	0
1420	PFR_JS13-1_1392	Integral membrane protein TerC	1589680	1590936	+	PROKKA_01417	Inner membrane protein alx	1589680	1590936	+		alx_2	similar to AA sequence:UniProtKB:P42601		1	0	0	0	0	0	0
1421	PFR_JS13-1_1393	Ionic transporter membrane protein chaA	1590933	1592033	+	PROKKA_01418	Sodium/proton antiporter ChaA	1590933	1592033	+		chaA	similar to AA sequence:UniProtKB:P31801		1	0	0	0	0	0	0
1422	PFR_JS13-1_1394	Radical SAM domain protein	1592097	1594040	-	PROKKA_01419	Radical SAM superfamily protein	1592097	1594040	-			protein motif:Pfam:PF04055.15		1	0	0	0	0	0	0
1423	PFR_JS13-1_1395	Hypothetical protein	1594095	1595387	-	PROKKA_01420	CAAX amino terminal protease self- immunity	1594095	1595387	-			protein motif:Pfam:PF02517.10		0	0	0	0	0	0	0
1424	PFR_JS13-1_1396	Nucleoside diphosphate kinase	1595384	1595875	-	PROKKA_01421	Nucleoside diphosphate kinase	1595384	1595875	-	2.7.4.6	ndkA	similar to AA sequence:UniProtKB:P84284		0	0	0	0	0	0	0
1425	PFR_JS13-1_1397	Protein FolC	1595939	1597444	-	PROKKA_01422	Folylpolyglutamate synthase	1595939	1597444	-	6.3.2.17	fgs	similar to AA sequence:UniProtKB:P15925		1	0	0	0	0	0	0
1426	PFR_JS13-1_1398	Putative type IV conjugative transfer system	1597559	1598170	+	PROKKA_01423	DoxX	1597559	1598170	+			protein motif:Pfam:PF07681.6		1	0	0	0	0	0	0
1427	PFR_JS13-1_1399	DSBA oxidoreductase	1598206	1599000	+	PROKKA_01424	hypothetical protein	1598206	1599000	+					1	0	0	0	0	0	0
1428	PFR_JS13-1_1400	DSBA-like thioredoxin domain protein	1599264	1600058	+	PROKKA_01425	DSBA-like thioredoxin domain protein	1599264	1600058	+			protein motif:Pfam:PF01323.14		0	0	0	0	0	0	0
1429	PFR_JS13-1_1401	Valyl tRNA synthetase	1600157	1602775	+	PROKKA_01426	Valine--tRNA ligase	1600157	1602775	+	6.1.1.9	valS	similar to AA sequence:UniProtKB:P96142		1	0	0	0	0	0	0
1430	PFR_JS13-1_1402	Haloacid dehalogenase superfamily enzyme,	1602882	1603589	-	PROKKA_01427	(S)-2-haloacid dehalogenase 4A	1602882	1603589	-	3.8.1.2	hdl IVa	similar to AA sequence:UniProtKB:Q51645		1	0	0	0	0	0	0
1431	PFR_JS13-1_1403	Phosphofructokinase	1603716	1604837	-	PROKKA_01428	6-phosphofructokinase	1603716	1604837	-	2.7.1.11	pfkA	similar to AA sequence:UniProtKB:Q8NR14		1	0	0	0	0	0	0
1432	PFR_JS13-1_1404	Threonine synthase	1604916	1606358	-	PROKKA_01429	Threonine synthase	1604916	1606358	-	4.2.3.1	thrC	similar to AA sequence:UniProtKB:P23669		1	0	0	0	0	0	0
1433	PFR_JS13-1_1405	Hypothetical protein	1606447	1606791	+	PROKKA_01430	hypothetical protein	1606447	1606791	+					0	0	0	0	0	0	0
1434						PROKKA_01431	tRNA-Pro(ggg)	1607958	1608039	+			COORDINATES:profile:Aragorn:1.2		0					0	0
1435	PFR_JS13-1_1406	ATP-dependent Clp protease ATP-binding subunit	1606903	1608180	-											0	0	0	0	0	0
1436	PFR_JS13-1_1407	ATP-dependent Clp protease proteolytic subunit 1	1608302	1608991	-	PROKKA_01432	ATP-dependent Clp protease proteolytic subunit 2	1608302	1608991	-	3.4.21.92	clpP2_1	similar to AA sequence:UniProtKB:Q9ZH58		1	0	0	0	0	0	0
1437	PFR_JS13-1_1408	ATP-dependent Clp protease proteolytic subunit 2	1609015	1609650	-	PROKKA_01433	ATP-dependent Clp protease proteolytic subunit 2	1609015	1609650	-	3.4.21.92	clpP2_2	similar to AA sequence:UniProtKB:Q8NN01		1	0	0	0	0	0	0
1438	PFR_JS13-1_1409	Pheromone autoinducer 2 transporter	1609737	1610969	-	PROKKA_01434	AI-2 transport protein TqsA	1609737	1610969	-		tqsA_1	similar to AA sequence:UniProtKB:P0AFS5		1	0	0	0	0	0	0
1439	PFR_JS13-1_1410	Inner membrane protein YhhT	1611202	1612395	-	PROKKA_01435	AI-2 transport protein TqsA	1611202	1612395	-		tqsA_2	similar to AA sequence:UniProtKB:P0AFS5		1	0	0	0	0	0	0
1440	PFR_JS13-1_1411	Trigger factor	1612620	1614203	-	PROKKA_01436	Trigger factor	1612620	1614203	-	5.2.1.8	tig	similar to AA sequence:UniProtKB:A0R199		1	0	0	0	0	0	0
1441						PROKKA_01437	tRNA-Gly(tcc)	1614334	1614407	-			COORDINATES:profile:Aragorn:1.2		0					0	0
1442						PROKKA_01438	tRNA-Pro(tgg)	1614667	1614741	+			COORDINATES:profile:Aragorn:1.2		0					0	0
1443	PFR_JS13-1_1412	Quaternary ammonium compound-resistance protein	1614939	1615253	-	PROKKA_01439	Quaternary ammonium compound-resistance protein SugE	1614939	1615253	-		sugE	similar to AA sequence:UniProtKB:P69937		1	0	0	0	0	0	0
1444	PFR_JS13-1_1413	Hypothetical protein	1615381	1615572	+	PROKKA_01440	hypothetical protein	1615381	1615572	+					1	0	0	0	0	0	0
1445	PFR_JS13-1_1414	Hypothetical protein	1615807	1617360	+	PROKKA_01441	hypothetical protein	1615807	1617360	+					1	0	0	0	0	0	0
1446	PFR_JS13-1_1415	DNA ligase	1617357	1619651	-	PROKKA_01442	DNA ligase	1617357	1619651	-	6.5.1.2	ligA	similar to AA sequence:UniProtKB:A0QUW7		1	0	0	0	0	0	0
1447	PFR_JS13-1_1416	Hypothetical protein	1619728	1620522	-	PROKKA_01443	hypothetical protein	1619728	1620522	-					1	0	0	0	0	0	0
1448	PFR_JS13-1_1417	Putative insertion element ISCmi2 transposase	1621077	1621751	+	PROKKA_01444	IS2 transposase TnpB	1621077	1621751	+			protein motif:CLUSTERS:PRK09409		0	0	0	0	0	0	0
1449	PFR_JS13-1_1418	DSBA oxidoreductase	1621845	1622459	-	PROKKA_01445	hypothetical protein	1621845	1622459	-					0	0	0	0	0	0	0
1450	PFR_JS13-1_1419	Aminopeptidase	1622802	1625405	+	PROKKA_01446	Aminopeptidase N	1622802	1625405	+	3.4.11.2	pepN	similar to AA sequence:UniProtKB:Q11010		1	0	0	0	0	0	0
1451	PFR_JS13-1_1420	6-phosphogluconate dehydrogenase, decarboxylating	1625603	1627060	+	PROKKA_01447	6-phosphogluconate dehydrogenase, decarboxylating	1625603	1627060	+	1.1.1.44	gnd	similar to AA sequence:UniProtKB:P00350		1	0	0	0	0	0	0
1452	PFR_JS13-1_1421	Putative phosphomethylpyrimidine kinase	1627190	1628011	+	PROKKA_01448	Pyridoxine kinase	1627190	1628011	+	2.7.1.35	pdxK	similar to AA sequence:UniProtKB:P39610		0	0	0	0	0	0	0
1453	PFR_JS13-1_1422	Acyl-CoA thioester hydrolase, YbgC/YbaW family	1628158	1629039	-	PROKKA_01449	Thioesterase superfamily protein	1628158	1629039	-			protein motif:Pfam:PF03061.16		1	0	0	0	0	0	0
1454	PFR_JS13-1_1423	AMP-dependent synthetase/ligase	1629045	1630934	-	PROKKA_01450	Long-chain-fatty-acid--CoA ligase FadD15	1629045	1630934	-	6.2.1.3		similar to AA sequence:UniProtKB:O53521		1	0	0	0	0	0	0
1455	PFR_JS13-1_1424	Transcriptional regulator, MarR family	1631111	1631569	+	PROKKA_01451	Transcriptional repressor MprA	1631111	1631569	+		mprA_1	similar to AA sequence:UniProtKB:P0ACR9		1	0	0	0	0	0	0
1456	PFR_JS13-1_1425	FAD linked oxidase protein	1631575	1634403	+	PROKKA_01452	putative FAD-linked oxidoreductase	1631575	1634403	+	1.-.-.-		similar to AA sequence:UniProtKB:Q50685		1	0	0	0	0	0	0
1457	PFR_JS13-1_1426	Peptidyl-dipeptidase Dcp	1634524	1636560	-	PROKKA_01453	Peptidyl-dipeptidase dcp	1634524	1636560	-	3.4.15.5	dcp	similar to AA sequence:UniProtKB:P24171		1	0	0	0	0	0	0
1458	PFR_JS13-1_1427	Hypothetical protein	1636617	1637987	+	PROKKA_01454	hypothetical protein	1636617	1637987	+					1	0	0	0	0	0	0
1459	PFR_JS13-1_1428	Dihydroxyacetone kinase subunit M	1637974	1639494	-	PROKKA_01455	PTS-dependent dihydroxyacetone kinase, phosphotransferase subunit DhaM	1637974	1639494	-		dhaM	similar to AA sequence:UniProtKB:P37349		1	0	0	0	0	0	0
1460	PFR_JS13-1_1429	Dihydroxyacetone kinase, L subunit	1639507	1640136	-	PROKKA_01456	PTS-dependent dihydroxyacetone kinase, ADP-binding subunit DhaL	1639507	1640136	-	2.7.-.-	dhaL	similar to AA sequence:UniProtKB:P76014		1	0	0	0	0	0	0
1461	PFR_JS13-1_1430	Dihydroxyacetone kinase, DhaK subunit	1640136	1641131	-	PROKKA_01457	PTS-dependent dihydroxyacetone kinase, dihydroxyacetone-binding subunit DhaK	1640136	1641131	-	2.7.-.-	dhaK_2	similar to AA sequence:UniProtKB:P76015		1	0	0	0	0	0	0
1462	PFR_JS13-1_1431	ATP-binding cassette protein, ChvD family	1641303	1642991	-	PROKKA_01458	putative ABC transporter ATP-binding protein/MT2552	1641303	1642991	-			similar to AA sequence:UniProtKB:O53204		1	0	0	0	0	0	0
1463	PFR_JS13-1_1432	Hypothetical protein	1643187	1643687	-	PROKKA_01459	Single-stranded DNA-binding protein 1	1643187	1643687	-		ssb1_1	similar to AA sequence:UniProtKB:Q9KYI9		1	0	0	0	0	0	0
1464	PFR_JS13-1_1433	Hypothetical protein	1643904	1644566	-	PROKKA_01460	hypothetical protein	1643904	1644566	-					1	0	0	0	0	0	0
1465	PFR_JS13-1_1434	Putative ABC transporter (Precursor)	1644563	1646206	-	PROKKA_01461	GTPase Era	1644563	1646206	-			protein motif:CLUSTERS:PRK00089		0	0	0	0	0	0	0
1466	PFR_JS13-1_1435	ATP-binding protein SCC61A06c	1646203	1648035	-	PROKKA_01462	Dynamin family protein	1646203	1648035	-			protein motif:Pfam:PF00350.17		1	0	0	0	0	0	0
1467	PFR_JS13-1_1436	Protease PrsW family protein	1648105	1649607	-	PROKKA_01463	hypothetical protein	1648105	1649607	-					1	0	0	0	0	0	0
1468						PROKKA_01464	tRNA-Arg(tct)	1649790	1649864	-			COORDINATES:profile:Aragorn:1.2		0					0	0
1469	PFR_JS13-1_1437	Transporter, major facilitator family protein	1650012	1651223	+	PROKKA_01465	multidrug resistance protein MdtH	1650012	1651223	+			protein motif:CLUSTERS:PRK11646	Putative antibiotic resistance	0	0	0	0	0	0	0
1470	PFR_JS13-1_1438	Oligoribonuclease	1651235	1651915	+	PROKKA_01466	Oligoribonuclease	1651235	1651915	+	3.1.-.-	orn	similar to AA sequence:UniProtKB:P57666		1	0	0	0	0	0	0
1471	PFR_JS13-1_1439	Hypothetical protein	1652002	1652442	-	PROKKA_01467	tRNA-His(gtg)	1651991	1652066	+			COORDINATES:profile:Aragorn:1.2		0	0	0	0	0	0	0
1472	PFR_JS13-1_1440	Hypothetical protein	1652509	1652703	-	PROKKA_01468	hypothetical protein	1652509	1652703	-					0	1	0	1	0	0	0
1473	PFR_JS13-1_1441	Cassette chromosome recombinase B4 (Fragment)	1652720	1653772	-	PROKKA_01469	hypothetical protein	1652720	1653772	-			protein motif:Pfam:PF00239.15	Resolvase, N terminal domain	0	1	0	1	0	0	0
1474	PFR_JS13-1_1442	Hypothetical protein	1654166	1654729	-	PROKKA_01470	hypothetical protein	1654166	1654729	-					0	1	0	1	0	0	0
1475	PFR_JS13-1_1443	Single-strand binding protein/Primosomal	1654741	1655181	-	PROKKA_01471	Single-stranded DNA-binding protein 1	1654741	1655181	-		ssb1_2	similar to AA sequence:UniProtKB:Q9KYI9		0	1	0	1	0	0	0
1476	PFR_JS13-1_1444	Type IV secretory pathway VirD4 protein-like	1655263	1657044	-	PROKKA_01472	Type IV secretory system Conjugative DNA transfer	1655263	1657044	-			protein motif:Pfam:PF02534.8		0	1	0	1	0	0	0
1477	PFR_JS13-1_1445	Hypothetical protein	1657041	1657574	-	PROKKA_01473	hypothetical protein	1657041	1657574	-					0	1	0	1	0	0	0
1478	PFR_JS13-1_1446	Hypothetical protein	1657593	1657754	+	PROKKA_01474	hypothetical protein	1657593	1657754	+					0	1	0	1	0	0	0
1479	PFR_JS13-1_1447	Hypothetical protein	1657813	1658298	+	PROKKA_01475	VanZ like family protein	1657813	1658298	+			protein motif:Pfam:PF04892.6		0	2	0	1	1	0	0
1480	PFR_JS13-1_1448	Hypothetical protein	1658441	1659028	+	PROKKA_01476	hypothetical protein	1658441	1659028	+					0	2	0	1	1	0	0
1481	PFR_JS13-1_1449	Low molecular weight protein-tyrosine-phosphatase	1659431	1659847	-	PROKKA_01477	phosphotyrosine-protein phosphatase	1659431	1659847	-			protein motif:CLUSTERS:PRK11391		0	2	0	1	1	0	0
1482	PFR_JS13-1_1450	Etk-like tyrosine kinase	1660242	1661909	+	PROKKA_01478	Tyrosine-protein kinase YwqD	1660242	1661909	+	2.7.10.2	ywqD	similar to AA sequence:UniProtKB:P96716		0	2	0	1	1	0	0
1483	PFR_JS13-1_1451	Undecaprenyl-phosphate galactose	1662066	1663562	+	PROKKA_01479	UDP-glucose:undecaprenyl-phosphate glucose-1-phosphate transferase	1662066	1663562	+	2.7.8.31	wcaJ	similar to AA sequence:UniProtKB:P71241		0	2	0	1	1	0	0
1484	PFR_JS13-1_1452	Uma4 protein	1664117	1665424	+	PROKKA_01480	Transposase	1664117	1665424	+			protein motif:Pfam:PF01610.11		0	1	0	1	0	0	0
1485	PFR_JS13-1_1453	Hypothetical protein	1666058	1666198	+	PROKKA_01481	hypothetical protein	1666058	1666198	+					0	1	0	1	0	0	0
1486	PFR_JS13-1_1454	Integrase family protein	1666837	1667745	-	PROKKA_01482	IS2 transposase TnpB	1666837	1667745	-			protein motif:CLUSTERS:PRK09409		0	2	1	1	0	0	0
1487	PFR_JS13-1_1455	Putative transposase orfA for insertion sequence	1667742	1668092	-	PROKKA_01483	Transposase	1667742	1668092	-			protein motif:Pfam:PF01527.14		0	2	1	1	0	0	0
1488	PFR_JS13-1_1456	Hypothetical protein	1668660	1668815	+	PROKKA_01484	hypothetical protein	1668660	1668815	+					0	2	1	1	0	0	0
1489	PFR_JS13-1_1457	Hypothetical protein	1669523	1669879	+	PROKKA_01485	Glycosyl transferases group 1	1669523	1669879	+			protein motif:Pfam:PF00534.14		0	2	1	1	0	0	0
1490	PFR_JS13-1_1458	Glycosyltransferase, family 1	1669881	1670903	+	PROKKA_01486	Glycogen synthase	1669881	1670903	+	2.4.1.11		similar to AA sequence:UniProtKB:O53279		0	2	1	1	0	0	0
1491	PFR_JS13-1_1459	Putative polysaccharide biosynthesis protein	1670900	1671958	+	PROKKA_01487	Polysaccharide pyruvyl transferase	1670900	1671958	+			protein motif:Pfam:PF04230.7		0	2	1	1	0	0	0
1492	PFR_JS13-1_1460	Glycosyltransferase	1671955	1672845	+	PROKKA_01488	Glycosyl transferase family 2	1671955	1672845	+			protein motif:Pfam:PF00535.20		0	2	1	1	0	0	0
1493	PFR_JS13-1_1461	Hypothetical protein	1672842	1673972	+	PROKKA_01489	hypothetical protein	1672842	1673972	+					0	2	1	1	0	0	0
1494	PFR_JS13-1_1462	Hypothetical protein	1673969	1675321	+	PROKKA_01490	hypothetical protein	1673969	1675321	+					0	2	1	1	0	0	0
1495	PFR_JS13-1_1463	Transposase OrfB, IS3 family	1675693	1675938	-	PROKKA_01491	hypothetical protein	1675693	1675938	-					0	2	1	1	0	0	0
1496	PFR_JS13-1_1464	IS3 family transposase OrfB (Fragment)	1676144	1676554	-	PROKKA_01492	hypothetical protein	1676144	1676554	-					0	2	1	1	0	0	0
1497	PFR_JS13-1_1465	Hypothetical protein	1676551	1676919	-	PROKKA_01493	hypothetical protein	1676551	1676919	-					0	2	1	1	0	0	0
1498	PFR_JS13-1_1466	Transposase of ISAar20, ISL3 family	1676978	1678285	-	PROKKA_01494	Transposase	1676978	1678285	-			protein motif:Pfam:PF01610.11		0	1	0	1	0	0	0
1499	PFR_JS13-1_1467	Hypothetical protein	1678517	1679050	+	PROKKA_01495	hypothetical protein	1678517	1679050	+					0	1	0	1	0	0	0
1500	PFR_JS13-1_1468	Hypothetical protein	1680794	1680931	-	PROKKA_01496	hypothetical protein	1680794	1680931	-					0	1	0	1	0	0	0
1501	PFR_JS13-1_1469	Putative insertion element ISCmi2 transposase	1680949	1681623	-	PROKKA_01497	IS2 transposase TnpB	1680949	1681623	-			protein motif:CLUSTERS:PRK09409		0	1	0	1	0	0	0
1502	PFR_JS13-1_1470	Transposase of ISAar43, IS3 family, IS407 group,	1682078	1682362	+	PROKKA_01498	Transposase	1682078	1682362	+			protein motif:Pfam:PF01527.14		0	1	0	1	0	0	0
1503	PFR_JS13-1_1471	Insertion sequence IS407 OrfB	1682413	1683228	+	PROKKA_01499	Integrase core domain protein	1682413	1683228	+			protein motif:Pfam:PF00665.20		0	1	0	1	0	0	1
1504	PFR_JS13-1_1472	Transcriptional regulator LytR	1683390	1684514	+	PROKKA_01500	Transcriptional regulator LytR	1683390	1684514	+		lytR_1	similar to AA sequence:UniProtKB:Q02115		0	1	0	1	0	0	1
1505	PFR_JS13-1_1473	Hypothetical protein	1685233	1685625	-	PROKKA_01501	hypothetical protein	1685233	1685625	-					0	1	0	1	0	0	1
1506	PFR_JS13-1_1474	Hypothetical protein	1685911	1686255	+	PROKKA_01502	Transposase	1685911	1686255	+			protein motif:Pfam:PF01527.14		0	1	0	1	0	0	1
1507	PFR_JS13-1_1475	Putative IS1236 transposase	1686252	1686896	+	PROKKA_01503	hypothetical protein	1686252	1686896	+					0	1	0	1	0	0	1
1508	PFR_JS13-1_1476	ISMca2 transposase	1686844	1687161	+	PROKKA_01504	Integrase core domain protein	1686844	1687161	+			protein motif:Pfam:PF00665.20		0	1	0	1	0	0	1
1509	PFR_JS13-1_1477	Metal dependent phosphohydrolase	1687702	1688208	-	PROKKA_01505	Bifunctional (p)ppGpp synthase/hydrolase RelA	1687702	1688208	-		relA_2	similar to AA sequence:UniProtKB:Q54089		1	0	0	0	0	0	1
1510	PFR_JS13-1_1478	Putative excision nuclease ABC subunit	1688283	1690616	+	PROKKA_01506	UvrABC system protein A	1688283	1690616	+		uvrA_3	similar to AA sequence:UniProtKB:Q9WYV0		1	0	0	0	0	0	1
1511	PFR_JS13-1_1479	Putative secreted tyrosine phosphatase	1690686	1691531	+	PROKKA_01507	Tyrosine-protein phosphatase precursor	1690686	1691531	+	3.1.3.48	iphP	similar to AA sequence:UniProtKB:Q05918		1	0	0	0	0	0	0
1512	PFR_JS13-1_1480	Mur ligase middle domain protein	1691635	1692957	+	PROKKA_01508	UDP-N-acetylmuramoylalanyl-D-glutamate--2,6-diaminopimelate ligase	1691635	1692957	+			protein motif:CLUSTERS:PRK00139		1	0	0	0	0	0	0
1513	PFR_JS13-1_1481	CobB/CobQ-like glutamine amidotransferase domain	1692951	1693724	+	PROKKA_01509	Cobyric acid synthase	1692951	1693724	+		cobQ_2	similar to AA sequence:UniProtKB:P29932		1	0	0	0	0	0	0
1514						PROKKA_01510	tRNA-Lys(ctt)	1693855	1693928	-			COORDINATES:profile:Aragorn:1.2		0					0	0
1515	PFR_JS13-1_1482	10 kDa chaperonin	1693986	1694435	-	PROKKA_01511	10 kDa chaperonin 5	1693986	1694435	-		groS5	similar to AA sequence:UniProtKB:P35474		1	0	0	0	0	0	0
1516	PFR_JS13-1_1483	Hypothetical protein	1694462	1694761	-	PROKKA_01512	hypothetical protein	1694462	1694761	-					1	0	0	0	0	0	0
1517	PFR_JS13-1_1484	Bacterioferritin comigratory protein	1694935	1695423	+	PROKKA_01513	Putative peroxiredoxin/MT2597	1694935	1695423	+	1.11.1.15	bcp	similar to AA sequence:UniProtKB:O53226		1	0	0	0	0	0	0
1518						PROKKA_01514	tRNA-Leu(tag)	1695567	1695650	+			COORDINATES:profile:Aragorn:1.2		0					0	0
1519	PFR_JS13-1_1485	Class II aldolase/adducin family protein	1695716	1696408	+	PROKKA_01515	L-ribulose-5-phosphate 4-epimerase UlaF	1695716	1696408	+	5.1.3.4	ulaF	similar to AA sequence:UniProtKB:P39306		1	0	0	0	0	0	0
1520	PFR_JS13-1_1486	Precorrin-6x reductase cobK	1696389	1697156	+	PROKKA_01516	Precorrin-6A reductase	1696389	1697156	+	1.3.1.54	cobK	similar to AA sequence:UniProtKB:P21920		1	0	0	0	0	0	0
1521	PFR_JS13-1_1487	Precorrin-6Y C5,15-methyltransferase, CbiT	1697229	1697819	+	PROKKA_01517	Precorrin-6Y C(5,15)-methyltransferase [decarboxylating]	1697229	1697819	+	2.1.1.132	cobL	similar to AA sequence:UniProtKB:P21921		1	0	0	0	0	0	0
1522	PFR_JS13-1_1488	Precorrin-8X methylmutase	1697916	1698569	+	PROKKA_01518	Precorrin-8X methylmutase	1697916	1698569	+	5.4.1.2	cobH	similar to AA sequence:UniProtKB:P21638		1	0	0	0	0	0	0
1523	PFR_JS13-1_1489	Cobalamin biosynthesis protein CbiD (Precursor)	1698566	1699858	+	PROKKA_01519	cobalt-precorrin-6A synthase	1698566	1699858	+			protein motif:CLUSTERS:PRK00075		1	0	0	0	0	0	0
1524	PFR_JS13-1_1490	Cobalamin synthesis protein, fusion CysG CbiX	1699890	1701131	-	PROKKA_01520	Sirohydrochlorin cobaltochelatase	1699890	1701131	-	4.99.1.3	cbiX	similar to AA sequence:UniProtKB:O87690		1	0	0	0	0	0	0
1525	PFR_JS13-1_1491	Bifunctional cbiH protein and precorrin-3B	1701124	1703769	-	PROKKA_01521	Cobalt-precorrin-3B C(17)-methyltransferase	1701124	1703769	-	2.1.1.-	cbiH	similar to AA sequence:UniProtKB:Q05590		0	0	0	0	0	0	0
1526	PFR_JS13-1_1492	Tetrapyrrole methylase, precorrin-3 methylase,	1703766	1704725	-	PROKKA_01522	Cobalt-precorrin-4 C(11)-methyltransferase	1703766	1704725	-	2.1.1.271	cbiF	similar to AA sequence:UniProtKB:P0A2G9		1	0	0	0	0	0	0
1527	PFR_JS13-1_1493	Precorrin-2 C20-methyltransferase CbiL	1704755	1705528	-	PROKKA_01523	Precorrin-2 C(20)-methyltransferase	1704755	1705528	-	2.1.1.130	cobI	similar to AA sequence:UniProtKB:P21639		1	0	0	0	0	0	0
1528	PFR_JS13-1_1494	Hypothetical protein	1706103	1706366	+	PROKKA_01524	hypothetical protein	1706103	1706366	+					1	0	0	0	0	0	0
1529	PFR_JS13-1_1495	Methylmalonyl-CoA mutase small subunit mutA	1706363	1708279	+	PROKKA_01525	Methylmalonyl-CoA mutase small subunit	1706363	1708279	+	5.4.99.2	mutA	similar to AA sequence:UniProtKB:P11652		1	0	0	0	0	0	0
1530	PFR_JS13-1_1496	Methylmalonyl-CoA mutase large subunit mutB	1708276	1710462	+	PROKKA_01526	Methylmalonyl-CoA mutase large subunit	1708276	1710462	+	5.4.99.2	mutB	similar to AA sequence:UniProtKB:P11653		1	0	0	0	0	0	0
1531	PFR_JS13-1_1497	LAO/AO transport system ATPase	1710455	1711468	+	PROKKA_01527	putative GTPase/MT1543	1710455	1711468	+	3.6.-.-		similar to AA sequence:UniProtKB:P63577		1	0	0	0	0	0	0
1532	PFR_JS13-1_1498	DNA polymerase IV	1711671	1713122	-	PROKKA_01528	DNA polymerase IV	1711671	1713122	-	2.7.7.7	dinB_2	similar to AA sequence:UniProtKB:Q47155		1	0	0	0	0	0	0
1533	PFR_JS13-1_1499	Dihydrofolate reductase	1713126	1713728	-	PROKKA_01529	Dihydrofolate reductase	1713126	1713728	-	1.5.1.3	folA	similar to AA sequence:UniProtKB:P04174		1	0	0	0	0	0	0
1534	PFR_JS13-1_1500	Thymidylate synthase	1713843	1714655	-	PROKKA_01530	Thymidylate synthase	1713843	1714655	-	2.1.1.45	thyA	similar to AA sequence:UniProtKB:P67042		1	0	0	0	0	0	0
1535	PFR_JS13-1_1501	Non-canonical purine NTP pyrophosphatase	1714657	1715463	-	PROKKA_01531	dITP/XTP pyrophosphatase	1714657	1715463	-	3.6.1.19	rdgB	similar to AA sequence:UniProtKB:P52061		1	0	0	0	0	0	0
1536	PFR_JS13-1_1502	TRNA nucleotidyltransferase	1715460	1716221	-	PROKKA_01532	Ribonuclease PH	1715460	1716221	-	2.7.7.56	rph	similar to AA sequence:UniProtKB:P50597		1	0	0	0	0	0	0
1537	PFR_JS13-1_1503	Glutamate racemase	1716375	1717193	-	PROKKA_01533	Glutamate racemase	1716375	1717193	-	5.1.1.3	murI	similar to AA sequence:UniProtKB:O31332		1	0	0	0	0	0	0
1538	PFR_JS13-1_1504	Hypothetical protein	1717281	1717889	-	PROKKA_01534	hypothetical protein	1717281	1717889	-					1	0	0	0	0	0	0
1539	PFR_JS13-1_1505	ATP-dependent Clp protease adapter protein ClpS	1717886	1718179	-	PROKKA_01535	ATP-dependent Clp protease adaptor protein ClpS	1717886	1718179	-			protein motif:CLUSTERS:PRK00033		1	0	0	0	0	0	0
1540	PFR_JS13-1_1506	Nicotinate phosphoribosyltransferase	1718306	1719661	+	PROKKA_01536	Nicotinate phosphoribosyltransferase pncB1	1718306	1719661	+	6.3.4.21	pncB1	similar to AA sequence:UniProtKB:Q10641		1	0	0	0	0	0	0
1541	PFR_JS13-1_1507	Naphthoate synthase	1719786	1720829	+	PROKKA_01537	1,4-Dihydroxy-2-naphthoyl-CoA synthase	1719786	1720829	+	4.1.3.36	menB	similar to AA sequence:UniProtKB:A0QRD3		1	0	0	0	0	0	0
1542	PFR_JS13-1_1508	O-succinylbenzoic acid-CoA ligase menE	1720902	1722134	+	PROKKA_01538	2-succinylbenzoate--CoA ligase	1720902	1722134	+	6.2.1.26	menE	similar to AA sequence:UniProtKB:P63526		1	0	0	0	0	0	0
1543	PFR_JS13-1_1509	Isochorismate synthase	1722246	1723469	+	PROKKA_01539	Isochorismate synthase EntC	1722246	1723469	+	5.4.4.2	entC	similar to AA sequence:UniProtKB:P0AEJ2		1	0	0	0	0	0	0
1544	PFR_JS13-1_1510	Hypothetical protein	1723617	1724093	-	PROKKA_01540	hypothetical protein	1723617	1724093	-					0	0	0	0	0	0	0
1545	PFR_JS13-1_1511	Putative excinuclease ABC, A subunit	1724264	1726834	-	PROKKA_01541	UvrABC system protein A	1724264	1726834	-		uvrA_4	similar to AA sequence:UniProtKB:P63383		0	0	0	0	0	0	0
1546	PFR_JS13-1_1512	2-succinyl-5-enolpyruvyl-6-hydroxy-3-cyclohexene-1-carboxylate	1726942	1728597	-	PROKKA_01542	2-succinyl-5-enolpyruvyl-6-hydroxy-3-cyclohexene-1-carboxylate synthase	1726942	1728597	-	2.2.1.9	menD	similar to AA sequence:UniProtKB:Q99V50		1	0	0	0	0	0	0
1547	PFR_JS13-1_1513	Mandelate racemase/muconate lactonizing protein	1728722	1729720	-	PROKKA_01543	L-Ala-D/L-Glu epimerase	1728722	1729720	-	5.1.1.-		similar to AA sequence:UniProtKB:Q97MK4		1	0	0	0	0	0	0
1548	PFR_JS13-1_1514	4-alpha-glucanotransferase malQ	1729717	1731906	-	PROKKA_01544	4-alpha-glucanotransferase	1729717	1731906	-	2.4.1.25	malQ_2	similar to AA sequence:UniProtKB:Q59266		1	0	0	0	0	0	0
1549	PFR_JS13-1_1515	Hypothetical protein	1732037	1733089	-	PROKKA_01545	RDD family protein	1732037	1733089	-			protein motif:Pfam:PF06271.6		1	0	0	0	0	0	0
1550	PFR_JS13-1_1516	Multidrug resistance efflux protein	1733263	1734774	-	PROKKA_01546	Multidrug resistance protein 3	1733263	1734774	-		bmr3_1	similar to AA sequence:UniProtKB:P96712	Putative antibiotic resistance	1	0	0	0	0	0	0
1551	PFR_JS13-1_1517	PF11238 family protein	1734833	1735096	+	PROKKA_01547	hypothetical protein	1734833	1735096	+					1	0	0	0	0	0	0
1552	PFR_JS13-1_1518	Cation diffusion facilitator family transporter	1735251	1736291	-	PROKKA_01548	ferrous iron efflux protein F	1735251	1736291	-			protein motif:CLUSTERS:PRK09509		1	0	0	0	0	0	0
1553	PFR_JS13-1_1519	SIS regulatory protein	1736403	1737419	-	PROKKA_01549	hypothetical protein	1736403	1737419	-			protein motif:Pfam:PF10432.3	Bacterial phospho-glucose isomerase C-terminal region	1	0	0	0	0	0	0
1554	PFR_JS13-1_1520	Hypothetical protein	1737427	1737627	-	PROKKA_01550	hypothetical protein	1737427	1737627	-			protein motif:CLUSTERS:PRK11827		1	0	0	0	0	0	0
1555	PFR_JS13-1_1521	HAD-superfamily hydrolase, subfamily IIB	1737688	1738503	-	PROKKA_01551	Eukaryotic phosphomannomutase	1737688	1738503	-			protein motif:Pfam:PF03332.7		1	0	0	0	0	0	0
1556	PFR_JS13-1_1522	Hypothetical protein	1738619	1739119	-	PROKKA_01552	hypothetical protein	1738619	1739119	-					1	0	0	0	0	0	0
1557	PFR_JS13-1_1523	Hypothetical protein	1739186	1739626	+	PROKKA_01553	Possibl zinc metallo-peptidase	1739186	1739626	+			protein motif:Pfam:PF06262.5		1	0	0	0	0	0	0
1558	PFR_JS13-1_1524	Hypothetical protein	1739731	1741083	-	PROKKA_01554	hypothetical protein	1739731	1741083	-					1	0	0	0	0	0	0
1559	PFR_JS13-1_1525	Putative glycosyltransferase	1741080	1744496	-	PROKKA_01555	hypothetical protein	1741080	1744496	-					1	0	0	0	0	0	0
1560	PFR_JS13-1_1526	Transcription factor WhiB	1744525	1744785	-	PROKKA_01556	Transcriptional regulator WhiB	1744525	1744785	-		whiB	similar to AA sequence:UniProtKB:Q7AKN0		1	0	0	0	0	0	0
1561	PFR_JS13-1_1527	Hypothetical protein	1745118	1746200	-	PROKKA_01557	hypothetical protein	1745118	1746200	-					0	0	0	0	0	0	0
1562	PFR_JS13-1_1528	Mannose-1-phosphate guanylyltransferase (GDP)	1746197	1747276	-	PROKKA_01558	Mannose-1-phosphate guanylyltransferase RfbM	1746197	1747276	-	2.7.7.13	rfbM	similar to AA sequence:UniProtKB:P26404		1	0	0	0	0	0	0
1563	PFR_JS13-1_1529	Cell envelope-related transcriptional attenuator	1747402	1748724	+	PROKKA_01559	Regulatory protein MsrR	1747402	1748724	+		msrR	similar to AA sequence:UniProtKB:Q99Q02		1	0	0	0	0	0	0
1564	PFR_JS13-1_1530	Phosphoribosylaminoimidazole carboxylase,	1748762	1749322	-	PROKKA_01560	N5-carboxyaminoimidazole ribonucleotide mutase	1748762	1749322	-	5.4.99.18	purE	similar to AA sequence:UniProtKB:P96880		1	0	0	0	0	0	0
1565	PFR_JS13-1_1531	Phosphoribosylaminoimidazole carboxylase, ATPase	1749315	1750487	-	PROKKA_01561	N5-carboxyaminoimidazole ribonucleotide synthase	1749315	1750487	-	6.3.4.18	purK	similar to AA sequence:UniProtKB:O66608		1	0	0	0	0	0	0
1566	PFR_JS13-1_1532	Peptidase family S51	1750565	1751281	+	PROKKA_01562	Peptidase family S51	1750565	1751281	+			protein motif:Pfam:PF03575.1		1	0	0	0	0	0	0
1567	PFR_JS13-1_1533	Transcriptional regulator	1751331	1751915	-	PROKKA_01563	Bacterial regulatory proteins, tetR family	1751331	1751915	-			protein motif:Pfam:PF00440.17		1	0	0	0	0	0	0
1568	PFR_JS13-1_1534	Hypothetical protein	1751997	1752500	-	PROKKA_01564	Bacterial membrane flanked domain protein	1751997	1752500	-			protein motif:Pfam:PF03703.8		1	0	0	0	0	0	0
1569	PFR_JS13-1_1535	Biotin apo-protein ligase	1752534	1753325	-	PROKKA_01565	Bifunctional ligase/repressor BirA	1752534	1753325	-	6.3.4.15	birA	similar to AA sequence:UniProtKB:P0CI75		1	0	0	0	0	0	0
1570	PFR_JS13-1_1536	Transcriptional regulator	1753475	1754080	+	PROKKA_01566	DNA-binding transcriptional repressor AcrR	1753475	1754080	+			protein motif:CLUSTERS:PRK10668		1	0	0	0	0	0	0
1571	PFR_JS13-1_1537	Transcription regulator	1754094	1754672	-	PROKKA_01567	MarR family protein	1754094	1754672	-			protein motif:Pfam:PF01047.16		1	0	0	0	0	0	0
1572	PFR_JS13-1_1538	Hypothetical protein	1754787	1755305	-	PROKKA_01568	hypothetical protein	1754787	1755305	-					1	0	0	0	0	0	0
1573	PFR_JS13-1_1539	Tetronasin ABC transporter ATP-binding protein	1755410	1756354	+	PROKKA_01569	Daunorubicin/doxorubicin resistance ATP-binding protein DrrA	1755410	1756354	+	3.6.3.-	drrA_4	similar to AA sequence:UniProtKB:P32010		1	0	0	0	0	0	0
1574	PFR_JS13-1_1540	Tetronasin-transport membrane protein ABC	1756351	1757991	+	PROKKA_01570	ABC-2 family transporter protein	1756351	1757991	+			protein motif:Pfam:PF12730.1		1	0	0	0	0	0	0
1575	PFR_JS13-1_1541	Integral membrane protein	1758099	1759445	-	PROKKA_01571	Inner membrane protein YjjP	1758099	1759445	-		yjjP	similar to AA sequence:UniProtKB:P0ADD5		1	0	0	0	0	0	0
1576	PFR_JS13-1_1542	Carboxyl transferase domain protein	1759577	1761151	+	PROKKA_01572	putative propionyl-CoA carboxylase beta chain 5	1759577	1761151	+	6.4.1.3	accD5	similar to AA sequence:UniProtKB:P96885		1	0	0	0	0	0	0
1577	PFR_JS13-1_1543	Hypothetical protein	1761157	1761411	+	PROKKA_01573	hypothetical protein	1761157	1761411	+					1	0	0	0	0	0	0
1578	PFR_JS13-1_1544	Septum formation protein Maf	1761462	1762190	+	PROKKA_01574	Maf-like protein YceF	1761462	1762190	+		yceF	similar to AA sequence:UniProtKB:P0A729		1	0	0	0	0	0	0
1579	PFR_JS13-1_1545	Hydrolase, NUDIX family	1762194	1762694	+	PROKKA_01575	dihydroneopterin triphosphate pyrophosphatase	1762194	1762694	+			protein motif:CLUSTERS:PRK09438		0	0	0	0	0	0	0
1580	PFR_JS13-1_1546	Hypothetical protein	1762785	1763264	-	PROKKA_01576	hypothetical protein	1762785	1763264	-					1	0	0	0	0	0	0
1581	PFR_JS13-1_1547	Hypothetical protein	1763545	1763760	+	PROKKA_01577	hypothetical protein	1763545	1763760	+					1	0	0	0	0	0	0
1582	PFR_JS13-1_1548	Endonuclease VIII and DNA N-glycosylase with an	1763899	1764714	+	PROKKA_01578	Endonuclease 8 1	1763899	1764714	+	3.2.2.-	nei1	similar to AA sequence:UniProtKB:P64158		1	0	0	0	0	0	0
1583	PFR_JS13-1_1549	Phosphoribosylglycinamide synthetase, ATP-grasp	1764870	1766651	+	PROKKA_01579	2-oxoglutarate carboxylase small subunit	1764870	1766651	+	6.4.1.7	cfiB	similar to AA sequence:UniProtKB:D3DJ42		1	0	0	0	0	0	0
1584	PFR_JS13-1_1550	Hypothetical protein	1766704	1767246	+	PROKKA_01580	hypothetical protein	1766704	1767246	+					1	0	0	0	0	0	0
1585	PFR_JS13-1_1551	Genome sequencing data, contig C257	1767274	1768281	-	PROKKA_01581	NAD-dependent dihydropyrimidine dehydrogenase subunit PreA	1767274	1768281	-	1.3.1.1	preA_1	similar to AA sequence:UniProtKB:P25889		1	0	0	0	0	0	0
1586	PFR_JS13-1_1552	Pyruvate-flavodoxin oxidoreductase (Precursor)	1768285	1772004	-	PROKKA_01582	Pyruvate-flavodoxin oxidoreductase	1768285	1772004	-	1.2.7.-	nifJ_1	similar to AA sequence:UniProtKB:Q06879		1	0	0	0	0	0	0
1587	PFR_JS13-1_1553	Hypothetical protein	1772316	1774103	+	PROKKA_01583	hypothetical protein	1772316	1774103	+					1	0	0	0	0	0	0
1588	PFR_JS13-1_1554	Chlorophyll synthesis pathway protein BchC	1774241	1775284	+	PROKKA_01584	Alcohol dehydrogenase	1774241	1775284	+	1.1.1.1	adhT	similar to AA sequence:UniProtKB:P12311		1	0	0	0	0	0	0
1589	PFR_JS13-1_1555	Hypothetical protein	1775416	1775814	-	PROKKA_01585	hypothetical protein	1775416	1775814	-					0	0	0	0	0	0	0
1590	PFR_JS13-1_1556	Puromycin N-acetyltransferase	1776135	1776755	+	PROKKA_01586	Acetyltransferase (GNAT) family protein	1776135	1776755	+			protein motif:Pfam:PF00583.18		1	0	0	0	0	0	0
1591	PFR_JS13-1_1557	Hypothetical protein	1777886	1778056	-	PROKKA_01587	NAD-dependent protein deacetylase	1777886	1778056	-		cobB_2	protein motif:HAMAP:MF_01968		0	0	0	0	0	0	0
1592	PFR_JS13-1_1558	Carboxymuconolactone decarboxylase	1778053	1778460	-	PROKKA_01588	Carboxymuconolactone decarboxylase family protein	1778053	1778460	-			protein motif:Pfam:PF02627.1		1	0	0	0	0	0	0
1593	PFR_JS13-1_1559	Transcriptional regulator, MerR family	1778573	1778938	+	PROKKA_01589	HTH-type transcriptional regulator AdhR	1778573	1778938	+		adhR	similar to AA sequence:UniProtKB:O06008		1	0	0	0	0	0	0
1594	PFR_JS13-1_1560	Hypothetical protein	1779111	1779566	+	PROKKA_01590	hypothetical protein	1779111	1779566	+					0	0	0	0	0	0	0
1595	PFR_JS13-1_1561	PF04239 family protein	1779563	1780207	+	PROKKA_01591	hypothetical protein	1779563	1780207	+					1	0	0	0	0	0	0
1596	PFR_JS13-1_1562	Silent information regulator protein Sir2	1780226	1781149	-	PROKKA_01592	NAD-dependent protein deacetylase	1780226	1781149	-	3.5.1.-	cobB_3	similar to AA sequence:UniProtKB:Q9WYW0		1	0	0	0	0	0	0
1597	PFR_JS13-1_1563	Methionyl-tRNA synthetase (Methionine--tRNA	1781377	1783323	-	PROKKA_01593	Methionine--tRNA ligase	1781377	1783323	-	6.1.1.10	metG	similar to AA sequence:UniProtKB:P00959		1	0	0	0	0	0	0
1598	PFR_JS13-1_1564	Enoyl-CoA hydratase echA9	1783364	1784296	+	PROKKA_01594	putative enoyl-CoA hydratase echA8	1783364	1784296	+	4.2.1.17	echA8	similar to AA sequence:UniProtKB:P64016		1	0	0	0	0	0	0
1599	PFR_JS13-1_1565	Hypothetical protein	1784373	1784888	-	PROKKA_01595	hypothetical protein	1784373	1784888	-					1	0	0	0	0	0	0
1600	PFR_JS13-1_1566	Ribonuclease H	1784965	1785996	-	PROKKA_01596	Ribonuclease HI	1784965	1785996	-	3.1.26.4	rnhA	similar to AA sequence:UniProtKB:P0A7Y4		1	0	0	0	0	0	0
1601	PFR_JS13-1_1567	Basic membrane protein	1786068	1787012	-	PROKKA_01597	Basic membrane protein	1786068	1787012	-			protein motif:Pfam:PF02608.8		1	0	0	0	0	0	0
1602	PFR_JS13-1_1568	Phosphotransferase family protein	1787262	1788551	-	PROKKA_01598	hypothetical protein	1787262	1788551	-					1	0	0	0	0	0	0
1603	PFR_JS13-1_1569	CBS domain pair protein	1788615	1790135	-	PROKKA_01599	Hemolysin C	1788615	1790135	-		tlyC	similar to AA sequence:UniProtKB:O05961		1	0	0	0	0	0	0
1604	PFR_JS13-1_1570	Predicted branched-chain amino acidpermease	1790458	1791096	+	PROKKA_01600	AzlC protein	1790458	1791096	+			protein motif:Pfam:PF03591.8		0	0	0	0	0	0	0
1605	PFR_JS13-1_1571	Hypothetical protein	1791093	1791404	+	PROKKA_01601	hypothetical protein	1791093	1791404	+					1	0	0	0	0	0	0
1606	PFR_JS13-1_1572	Isocitrate dehydrogenase [NADP]	1791596	1792813	-	PROKKA_01602	Isocitrate dehydrogenase [NADP]	1791596	1792813	-	1.1.1.42	icd	similar to AA sequence:UniProtKB:P65097		1	0	0	0	0	0	0
1607	PFR_JS13-1_1573	Malate dehydrogenase	1792991	1793977	+	PROKKA_01603	Malate dehydrogenase	1792991	1793977	+	1.1.1.37	mdh_2	similar to AA sequence:UniProtKB:P10584		1	0	0	0	0	0	0
1608	PFR_JS13-1_1574	Hypothetical protein	1794159	1794482	-	PROKKA_01604	hypothetical protein	1794159	1794482	-					1	0	0	0	0	0	0
1609	PFR_JS13-1_1575	Bifunctional protein FolD	1794488	1795348	-	PROKKA_01605	Bifunctional protein FolD protein	1794488	1795348	-		folD	similar to AA sequence:UniProtKB:Q8NSM0		1	0	0	0	0	0	0
1610	PFR_JS13-1_1576	Bifunctional purine biosynthesis protein PurH	1795422	1796975	-	PROKKA_01606	Bifunctional purine biosynthesis protein PurH	1795422	1796975	-		purH	similar to AA sequence:UniProtKB:Q8NS21		1	0	0	0	0	0	0
1611	PFR_JS13-1_1577	Phosphoribosylglycinamide formyltransferase	1797097	1797708	-	PROKKA_01607	Phosphoribosylglycinamide formyltransferase	1797097	1797708	-	2.1.2.2	purN	similar to AA sequence:UniProtKB:P71554		1	0	0	0	0	0	0
1612	PFR_JS13-1_1578	Hypothetical protein	1797719	1799197	-	PROKKA_01608	hypothetical protein	1797719	1799197	-					1	0	0	0	0	0	0
1613	PFR_JS13-1_1579	ATP-dependent DNA helicase PcrA	1799291	1801780	-	PROKKA_01609	ATP-dependent DNA helicase UvrD1	1799291	1801780	-	3.6.4.12	uvrD1_2	similar to AA sequence:UniProtKB:P0A5A3		1	0	0	0	0	0	0
1614	PFR_JS13-1_1580	Phospholipase D domain protein	1801917	1803170	+	PROKKA_01610	Cardiolipin synthase	1801917	1803170	+	2.7.8.-	cls	similar to AA sequence:UniProtKB:P63801		1	0	0	0	0	0	0
1615	PFR_JS13-1_1581	Fe(3 ) dicitrate transport ATP-binding protein	1803227	1803982	-	PROKKA_01611	Iron(3+)-hydroxamate import ATP-binding protein FhuC	1803227	1803982	-	3.6.3.34	fhuC	similar to AA sequence:UniProtKB:P07821		1	0	0	0	0	0	0
1616	PFR_JS13-1_1582	ABC-type cobalamin/Fe3-siderophores transport	1803979	1805019	-	PROKKA_01612	Iron-uptake system permease protein FeuC	1803979	1805019	-		feuC	similar to AA sequence:UniProtKB:P40411		1	0	0	0	0	0	0
1617	PFR_JS13-1_1583	ABC-type enterochelin transport system, permease	1805089	1805922	-	PROKKA_01613	Iron-uptake system permease protein FeuB	1805089	1805922	-		feuB	similar to AA sequence:UniProtKB:P40410		1	0	0	0	0	0	0
1618	PFR_JS13-1_1584	Iron compound ABC transporter, iron	1806116	1807132	-	PROKKA_01614	putative ABC transporter solute-binding protein YclQ precursor	1806116	1807132	-		yclQ	similar to AA sequence:UniProtKB:P94421		1	0	0	0	0	0	0
1619	PFR_JS13-1_1585	Hypothetical protein	1807423	1807674	+	PROKKA_01615	hypothetical protein	1807423	1807674	+			protein motif:CLUSTERS:PRK10457		1	0	0	0	0	0	0
1620	PFR_JS13-1_1586	Response regulator	1807911	1808609	-	PROKKA_01616	Transcriptional regulatory protein LiaR	1807911	1808609	-		liaR_2	similar to AA sequence:UniProtKB:O32197		1	0	0	0	0	0	0
1621	PFR_JS13-1_1587	Sensor histidine kinase	1808606	1809949	-	PROKKA_01617	Sensor histidine kinase LiaS	1808606	1809949	-	2.7.13.3	liaS	similar to AA sequence:UniProtKB:O32198		1	0	0	0	0	0	0
1622	PFR_JS13-1_1588	Possible stress-response transcriptional	1810191	1810481	+	PROKKA_01618	PspC domain protein	1810191	1810481	+			protein motif:Pfam:PF04024.6		1	0	0	0	0	0	0
1623	PFR_JS13-1_1589	NADPH:quinone reductase and related Zn-dependent	1810778	1811722	+	PROKKA_01619	Phthiocerol synthesis polyketide synthase type I PpsC	1810778	1811722	+	2.3.1.41	ppsC	similar to AA sequence:UniProtKB:P96202		1	0	0	0	0	0	0
1624	PFR_JS13-1_1590	Protein containing DUF1963	1811773	1812660	-	PROKKA_01620	hypothetical protein	1811773	1812660	-					1	0	0	0	0	0	0
1625						PROKKA_01621	hypothetical protein	1812713	1812976	+					0					0	0
1626	PFR_JS13-1_1591	GMP synthase (glutamine-hydrolyzing)	1812865	1814289	-	PROKKA_01622	GMP synthase [glutamine-hydrolyzing]	1812865	1814289	-	6.3.5.2	guaA_2	similar to AA sequence:UniProtKB:P0A5A1		1	0	0	0	0	0	0
1627	PFR_JS13-1_1592	ABC transporter, permease protein YjfF	1814714	1815742	-	PROKKA_01623	Inner membrane ABC transporter permease protein YjfF	1814714	1815742	-		yjfF	similar to AA sequence:UniProtKB:P37772		1	0	0	0	0	0	0
1628	PFR_JS13-1_1593	Permease component of	1815739	1816797	-	PROKKA_01624	Inner membrane ABC transporter permease protein YtfT	1815739	1816797	-		ytfT	similar to AA sequence:UniProtKB:P39328		1	0	0	0	0	0	0
1629	PFR_JS13-1_1594	Putative sugar ABC transport system, ATP-binding	1816794	1817684	-	PROKKA_01625	Ribose import ATP-binding protein RbsA	1816794	1817684	-	3.6.3.17	rbsA	similar to AA sequence:UniProtKB:P04983		0	0	0	0	0	0	0
1630	PFR_JS13-1_1595	Putative sugar ABC transport system, ATP-binding	1817706	1818326	-	PROKKA_01626	Arabinose import ATP-binding protein AraG	1817706	1818326	-	3.6.3.17	araG	similar to AA sequence:UniProtKB:P0AAF3		0	0	0	0	0	0	0
1631	PFR_JS13-1_1596	Hypothetical protein	1818464	1818880	-	PROKKA_01627	ABC transporter periplasmic-binding protein YtfQ precursor	1818464	1818880	-		ytfQ_1	similar to AA sequence:UniProtKB:P39325		0	0	0	0	0	0	0
1632	PFR_JS13-1_1597	ABC-type sugar transporter, periplasmic binding	1818819	1819445	-	PROKKA_01628	ABC transporter periplasmic-binding protein YtfQ precursor	1818819	1819445	-		ytfQ_2	similar to AA sequence:UniProtKB:P39325		0	0	0	0	0	0	0
1633	PFR_JS13-1_1598	Transcriptional regulator	1819689	1820726	-	PROKKA_01629	Ribose operon repressor	1819689	1820726	-		rbsR	similar to AA sequence:UniProtKB:P0ACQ0		1	0	0	0	0	0	0
1634	PFR_JS13-1_1599	L-arabinose isomerase 1	1820753	1822273	-	PROKKA_01630	L-arabinose isomerase	1820753	1822273	-	5.3.1.4	araA	similar to AA sequence:UniProtKB:Q9S467		1	0	0	0	0	0	0
1635	PFR_JS13-1_1600	Class II aldolase/adducin family protein	1822343	1823047	-	PROKKA_01631	L-ribulose-5-phosphate 4-epimerase	1822343	1823047	-	5.1.3.4	araD	similar to AA sequence:UniProtKB:P94525		1	0	0	0	0	0	0
1636	PFR_JS13-1_1601	Ribulokinase	1823044	1824813	-	PROKKA_01632	Ribulokinase	1823044	1824813	-	2.7.1.16	araB_3	similar to AA sequence:UniProtKB:P94524		0	0	0	0	0	0	0
1637	PFR_JS13-1_1602	Cysteine synthase	1825017	1825943	+	PROKKA_01633	O-acetylserine sulfhydrylase	1825017	1825943	+	2.5.1.47	cysK1_2	similar to AA sequence:UniProtKB:P0A534		1	0	0	0	0	0	0
1638	PFR_JS13-1_1603	Serine acetyltransferase	1825940	1826491	+	PROKKA_01634	Serine acetyltransferase	1825940	1826491	+	2.3.1.30	cysE	similar to AA sequence:UniProtKB:Q06750		1	0	0	0	0	0	0
1639	PFR_JS13-1_1604	Hypothetical protein	1826526	1827365	-	PROKKA_01635	N-acetylmuramoyl-L-alanine amidase	1826526	1827365	-			protein motif:Pfam:PF01520.12		1	0	0	0	0	0	0
1640	PFR_JS13-1_1605	Hypothetical protein	1827433	1828650	-	PROKKA_01636	hypothetical protein	1827433	1828650	-					0	0	0	0	0	0	0
1641	PFR_JS13-1_1606	Hypothetical protein	1828663	1830375	-	PROKKA_01637	hypothetical protein	1828663	1830375	-					0	0	0	0	0	0	0
1642	PFR_JS13-1_1607	Transcription initiation factor	1830400	1831716	-	PROKKA_01638	hypothetical protein	1830400	1831716	-					0	0	0	0	0	0	0
1643	PFR_JS13-1_1608	Chorismate mutase	1832020	1832349	-	PROKKA_01639	T-protein	1832020	1832349	-		tyrA_2	similar to AA sequence:UniProtKB:P07023		1	0	0	0	0	0	0
1644	PFR_JS13-1_1609	IMP dehydrogenase family protein	1832381	1833484	-	PROKKA_01640	putative oxidoreductase/MSMEI_1564	1832381	1833484	-	1.-.-.-		similar to AA sequence:UniProtKB:A0QSU4		1	0	0	0	0	0	0
1645	PFR_JS13-1_1610	Inosine-5'-monophosphate dehydrogenase GuaB	1833636	1835156	-	PROKKA_01641	Inosine-5'-monophosphate dehydrogenase	1833636	1835156	-	1.1.1.205	guaB_2	similar to AA sequence:UniProtKB:P65167		1	0	0	0	0	0	0
1646	PFR_JS13-1_1611	60 kDa chaperonin 2	1835303	1836895	-	PROKKA_01642	60 kDa chaperonin 1	1835303	1836895	-		groL1_2	similar to AA sequence:UniProtKB:Q00767		1	0	0	0	0	0	0
1647	PFR_JS13-1_1612	10 kDa chaperonin	1836917	1837213	-	PROKKA_01643	10 kDa chaperonin	1836917	1837213	-		groS	similar to AA sequence:UniProtKB:Q8NSS1		1	0	0	0	0	0	0
1648	PFR_JS13-1_1613	ProXL	1837450	1838481	-	PROKKA_01644	Putative osmoprotectant uptake system substrate-binding protein OsmF precursor	1837450	1838481	-		osmF_2	similar to AA sequence:UniProtKB:P33362		1	0	0	0	0	0	0
1649	PFR_JS13-1_1614	ProWL	1838485	1839222	-	PROKKA_01645	Glycine betaine/carnitine/choline transport system permease protein OpuCB	1838485	1839222	-		opuCB_1	similar to AA sequence:UniProtKB:O34878		1	0	0	0	0	0	0
1650	PFR_JS13-1_1615	Osmoprotectant transport ATP-binding protein ABC	1839219	1840553	-	PROKKA_01646	Choline transport ATP-binding protein OpuBA	1839219	1840553	-		opuBA_1	similar to AA sequence:UniProtKB:Q45460		1	0	0	0	0	0	0
1651	PFR_JS13-1_1616	ABC transporter, permease protein OpuCB	1840550	1841191	-	PROKKA_01647	Choline transport system permease protein OpuBB	1840550	1841191	-		opuBB	similar to AA sequence:UniProtKB:Q45461		1	0	0	0	0	0	0
1652	PFR_JS13-1_1617	RNA cap guanine-N2 methyltransferase	1841403	1842773	-	PROKKA_01648	Methyltransferase domain protein	1841403	1842773	-			protein motif:Pfam:PF12847.1		0	0	0	0	0	0	0
1653	PFR_JS13-1_1618	MFS transporter	1842798	1844093	-	PROKKA_01649	enterobactin exporter EntS	1842798	1844093	-			protein motif:CLUSTERS:PRK10489		1	0	0	0	0	0	0
1654	PFR_JS13-1_1619	Hydrolase, NUDIX family	1844237	1844722	-	PROKKA_01650	8-oxo-dGTP diphosphatase	1844237	1844722	-	3.6.1.55	mutX	similar to AA sequence:UniProtKB:P41354		1	0	0	0	0	0	0
1655	PFR_JS13-1_1620	Aminopeptidase C	1844777	1846225	-	PROKKA_01651	Aminopeptidase C	1844777	1846225	-	3.4.22.40	pepC_2	similar to AA sequence:UniProtKB:Q04723		1	0	0	0	0	0	0
1656	PFR_JS13-1_1621	Nicotinate-nucleotide--dimethylbenzimidazole	1846409	1848289	-	PROKKA_01652	5,6-dimethylbenzimidazole synthase	1846409	1848289	-	1.14.99.40	bluB	similar to AA sequence:UniProtKB:Q92PC8		1	0	0	0	0	0	0
1657	PFR_JS13-1_1622	Probable tRNA threonylcarbamoyladenosine	1848380	1849453	-	PROKKA_01653	tRNA N6-adenosine threonylcarbamoyltransferase	1848380	1849453	-	2.3.1.-	tsaD	similar to AA sequence:UniProtKB:Q2FWL2		1	0	0	0	0	0	0
1658	PFR_JS13-1_1623	RimI Ribosomal-protein-S18-alanine	1849450	1849971	-	PROKKA_01654	ribosomal-protein-alanine N-acetyltransferase	1849450	1849971	-			protein motif:CLUSTERS:PRK09491		1	0	0	0	0	0	0
1659	PFR_JS13-1_1624	Universal bacterial protein YeaZ	1849968	1850654	-	PROKKA_01655	tRNA threonylcarbamoyladenosine biosynthesis protein TsaB	1849968	1850654	-		tsaB	similar to AA sequence:UniProtKB:Q7CQE0		1	0	0	0	0	0	0
1660	PFR_JS13-1_1625	Putative ATPase or kinase	1850651	1851646	-	PROKKA_01656	tRNA threonylcarbamoyladenosine biosynthesis protein TsaE	1850651	1851646	-		tsaE	similar to AA sequence:UniProtKB:O05515		1	0	0	0	0	0	0
1661	PFR_JS13-1_1626	Hypothetical protein	1851909	1855013	-	PROKKA_01657	ATP-dependent RNA helicase DeaD	1851909	1855013	-	3.6.4.13	deaD	similar to AA sequence:UniProtKB:P0A9P6		1	0	0	0	0	0	0
1662	PFR_JS13-1_1627	Glycosyltransferase, group 1 family	1855291	1856436	+	PROKKA_01658	GDP-mannose-dependent alpha-mannosyltransferase	1855291	1856436	+	2.4.1.-	mgtA_2	similar to AA sequence:UniProtKB:O06423		1	0	0	0	0	0	0
1663	PFR_JS13-1_1628	YjeF protein	1856465	1857883	-	PROKKA_01659	Bifunctional NAD(P)H-hydrate repair enzyme Nnr	1856465	1857883	-		nnr	similar to AA sequence:UniProtKB:P31806		1	0	0	0	0	0	0
1664	PFR_JS13-1_1629	Holo-[acyl-carrier-protein] synthase AcpS	1857885	1858340	-	PROKKA_01660	Holo-[acyl-carrier-protein] synthase	1857885	1858340	-	2.7.8.7	acpS	similar to AA sequence:UniProtKB:O86785		0	0	0	0	0	0	0
1665	PFR_JS13-1_1630	Glucosamine--fructose-6-phosphate	1858381	1860231	-	PROKKA_01661	Glutamine--fructose-6-phosphate aminotransferase [isomerizing]	1858381	1860231	-	2.6.1.16	glmS	similar to AA sequence:UniProtKB:P17169		1	0	0	0	0	0	0
1666	PFR_JS13-1_1631	Pantothenate kinase	1860380	1861462	+	PROKKA_01662	Pantothenate kinase	1860380	1861462	+	2.7.1.33	coaA_1	similar to AA sequence:UniProtKB:P63810		1	0	0	0	0	0	0
1667	PFR_JS13-1_1632	Phosphoglucosamine mutase	1861585	1862928	-	PROKKA_01663	Phosphoglucosamine mutase	1861585	1862928	-	5.4.2.10	glmM	similar to AA sequence:UniProtKB:P99087		1	0	0	0	0	0	0
1668	PFR_JS13-1_1633	30S ribosomal protein S9	1863078	1863629	-	PROKKA_01664	30S ribosomal protein S9	1863078	1863629	-		rpsI	similar to AA sequence:UniProtKB:A0QSP9		1	0	0	0	0	0	0
1669	PFR_JS13-1_1634	50S ribosomal protein L13	1863626	1864069	-	PROKKA_01665	50S ribosomal protein L13	1863626	1864069	-		rplM	similar to AA sequence:UniProtKB:A0QSP8		1	0	0	0	0	0	0
1670	PFR_JS13-1_1635	Elongation factor G fusA2	1864370	1866466	+	PROKKA_01666	Elongation factor G	1864370	1866466	+		fus	similar to AA sequence:UniProtKB:Q5XDW4		1	0	0	0	0	0	0
1671	PFR_JS13-1_1636	PF03733 domain protein	1866598	1866993	-	PROKKA_01667	Inner membrane protein YccF	1866598	1866993	-		yccF	similar to AA sequence:UniProtKB:P0AB12		1	0	0	0	0	0	0
1672	PFR_JS13-1_1637	TRNA (guanine-N(7)-)-methyltransferase	1867206	1868105	+	PROKKA_01668	tRNA (guanine-N(7)-)-methyltransferase	1867206	1868105	+	2.1.1.33	trmB	similar to AA sequence:UniProtKB:P44648		1	0	0	0	0	0	0
1673	PFR_JS13-1_1638	TRNA pseudouridine synthase A	1868098	1868976	+	PROKKA_01669	tRNA pseudouridine synthase A	1868098	1868976	+	5.4.99.12	truA	similar to AA sequence:UniProtKB:P07649		1	0	0	0	0	0	0
1674	PFR_JS13-1_1639	Methyltransferase small domain protein	1869014	1869613	+	PROKKA_01670	Ribosomal RNA small subunit methyltransferase C	1869014	1869613	+	2.1.1.172	rsmC_2	similar to AA sequence:UniProtKB:P39406		1	0	0	0	0	0	0
1675	PFR_JS13-1_1640	Hypothetical protein	1869923	1870474	+	PROKKA_01671	hypothetical protein	1869923	1870474	+					1	0	0	0	0	0	0
1676	PFR_JS13-1_1641	Cobalt transport protein	1870520	1871620	+	PROKKA_01672	Energy-coupling factor transporter transmembrane protein EcfT	1870520	1871620	+		ecfT	similar to AA sequence:UniProtKB:Q03ZL4		1	0	0	0	0	0	0
1677	PFR_JS13-1_1642	ABC transporter	1871617	1873233	+	PROKKA_01673	Putative HMP/thiamine import ATP-binding protein YkoD	1871617	1873233	+	3.6.3.-	ykoD_2	similar to AA sequence:UniProtKB:O34362		1	0	0	0	0	0	0
1678	PFR_JS13-1_1643	Substrate-specific component CbrT of predicted	1873230	1874081	+	PROKKA_01674	hypothetical protein	1873230	1874081	+					1	0	0	0	0	0	0
1679	PFR_JS13-1_1644	Putative integral membrane transport protein	1874096	1875688	-	PROKKA_01675	hypothetical protein	1874096	1875688	-					1	0	0	0	0	0	0
1680	PFR_JS13-1_1645	ABC transporter domain-containing ATP-binding	1875658	1876698	-	PROKKA_01676	Fluoroquinolones export ATP-binding protein/MT2762	1875658	1876698	-	3.6.3.-		similar to AA sequence:UniProtKB:O07190		1	0	0	0	0	0	0
1681	PFR_JS13-1_1646	Superoxide dismutase	1876794	1877462	+	PROKKA_01677	Superoxide dismutase [Mn/Fe]	1876794	1877462	+	1.15.1.1	sodA	similar to AA sequence:UniProtKB:P80293		1	0	0	0	0	0	0
1682	PFR_JS13-1_1647	Resuscitation-promoting factor RpfB	1877757	1878842	+	PROKKA_01678	Resuscitation-promoting factor Rpf2 precursor	1877757	1878842	+	3.-.-.-	rpf2	similar to AA sequence:UniProtKB:Q6M6N7		1	0	0	0	0	0	0
1683	PFR_JS13-1_1648	Glycosyltransferase, group 1 family	1878952	1880193	-	PROKKA_01679	GDP-mannose-dependent alpha-(1-6)-phosphatidylinositol dimannoside mannosyltransferase	1878952	1880193	-	2.4.1.57	pimC	similar to AA sequence:UniProtKB:P0CF99		1	0	0	0	0	0	0
1684	PFR_JS13-1_1649	50S ribosomal protein L17	1880234	1880821	-	PROKKA_01680	50S ribosomal protein L17	1880234	1880821	-		rplQ	similar to AA sequence:UniProtKB:A0QSL9		1	0	0	0	0	0	0
1685	PFR_JS13-1_1650	DNA-directed RNA polymerase, alpha subunit	1880865	1881884	-	PROKKA_01681	DNA-directed RNA polymerase subunit alpha	1880865	1881884	-	2.7.7.6	rpoA	similar to AA sequence:UniProtKB:P66701		1	0	0	0	0	0	0
1686	PFR_JS13-1_1651	30S ribosomal protein S4	1882009	1882614	-	PROKKA_01682	30S ribosomal protein S4	1882009	1882614	-		rpsD	similar to AA sequence:UniProtKB:A0QSL7		1	0	0	0	0	0	0
1687	PFR_JS13-1_1652	30S ribosomal protein S11	1882645	1883052	-	PROKKA_01683	30S ribosomal protein S11	1882645	1883052	-		rpsK	similar to AA sequence:UniProtKB:P66357		1	0	0	0	0	0	0
1688	PFR_JS13-1_1653	30S ribosomal protein S13	1883098	1883472	-	PROKKA_01684	30S ribosomal protein S13	1883098	1883472	-		rpsM	similar to AA sequence:UniProtKB:A0QSL5		1	0	0	0	0	0	0
1689	PFR_JS13-1_1654	Hypothetical protein	1883725	1883838	-	PROKKA_01685	50S ribosomal protein L36	1883725	1883838	-		rpmJ	similar to AA sequence:UniProtKB:P07841		0	0	0	0	0	0	0
1690	PFR_JS13-1_1655	Translation initiation factor IF-1	1883931	1884152	-	PROKKA_01686	Translation initiation factor IF-1	1883931	1884152	-		infA	similar to AA sequence:UniProtKB:P0A5H5		1	0	0	0	0	0	0
1691	PFR_JS13-1_1656	Hypothetical protein	1884511	1884795	+	PROKKA_01687	YciI-like protein	1884511	1884795	+			protein motif:CLUSTERS:PRK12863		1	0	0	0	0	0	0
1692	PFR_JS13-1_1657	Hypothetical protein	1884826	1885212	-	PROKKA_01688	hypothetical protein	1884826	1885212	-					1	0	0	0	0	0	0
1693	PFR_JS13-1_1658	Methionyl aminopeptidase	1885238	1886068	-	PROKKA_01689	Methionine aminopeptidase 1	1885238	1886068	-	3.4.11.18	map_2	similar to AA sequence:UniProtKB:P19994		1	0	0	0	0	0	0
1694	PFR_JS13-1_1659	Adenylate kinase	1886080	1886640	-	PROKKA_01690	Adenylate kinase	1886080	1886640	-	2.7.4.3	adk	similar to AA sequence:UniProtKB:A0QSH8		1	0	0	0	0	0	0
1695	PFR_JS13-1_1660	Protein translocase subunit SecY	1886652	1887965	-	PROKKA_01691	preprotein translocase subunit SecY	1886652	1887965	-			protein motif:CLUSTERS:PRK09204		1	0	0	0	0	0	0
1696	PFR_JS13-1_1661	Dipeptide/oligopeptide ABC superfamily ATP	1888265	1889338	+	PROKKA_01692	Dipeptide transport system permease protein DppB	1888265	1889338	+		dppB_1	similar to AA sequence:UniProtKB:P0AEF8		0	0	0	0	0	0	0
1697	PFR_JS13-1_1662	Oligopeptide transport system permease protein	1889340	1890326	+	PROKKA_01693	Oligopeptide transport system permease protein OppC	1889340	1890326	+		oppC	similar to AA sequence:UniProtKB:P08006		1	0	0	0	0	0	0
1698	PFR_JS13-1_1663	Oligopeptide transport ATP-binding protein	1890323	1892422	+	PROKKA_01694	Glutathione import ATP-binding protein GsiA	1890323	1892422	+	3.6.3.-	gsiA_2	similar to AA sequence:UniProtKB:P75796		1	0	0	0	0	0	0
1699	PFR_JS13-1_1664	Oligopeptide-binding protein OppA	1892493	1894211	+	PROKKA_01695	putative monoacyl phosphatidylinositol tetramannoside-binding protein LpqW precursor	1892493	1894211	+			similar to AA sequence:UniProtKB:A0R2I8		0	0	0	0	0	0	0
1700	PFR_JS13-1_1665	Putative luciferase-like monooxygenase,	1894463	1895659	+	PROKKA_01696	hypothetical protein	1894463	1895659	+			protein motif:CLUSTERS:PRK10508		1	0	0	0	0	0	0
1701	PFR_JS13-1_1666	FMN reductase	1895770	1896417	+	PROKKA_01697	NAD(P)H-dependent FAD/FMN reductase	1895770	1896417	+	1.5.1.45		similar to AA sequence:UniProtKB:A4IT49		1	0	0	0	0	0	0
1702	PFR_JS13-1_1667	50S ribosomal protein L15	1896774	1897217	-	PROKKA_01698	50S ribosomal protein L15	1896774	1897217	-		rplO	similar to AA sequence:UniProtKB:P19946		1	0	0	0	0	0	0
1703	PFR_JS13-1_1668	50S ribosomal protein L30	1897219	1897401	-	PROKKA_01699	50S ribosomal protein L30	1897219	1897401	-		rpmD	similar to AA sequence:UniProtKB:P0AG51		1	0	0	0	0	0	0
1704	PFR_JS13-1_1669	30S ribosomal protein S5	1897401	1898012	-	PROKKA_01700	30S ribosomal protein S5	1897401	1898012	-		rpsE	similar to AA sequence:UniProtKB:Q6A6P3		1	0	0	0	0	0	0
1705	PFR_JS13-1_1670	50S ribosomal protein L18	1898035	1898418	-	PROKKA_01701	50S ribosomal protein L18	1898035	1898418	-		rplR	similar to AA sequence:UniProtKB:P46899		1	0	0	0	0	0	0
1706	PFR_JS13-1_1671	50S ribosomal protein L6	1898421	1898963	-	PROKKA_01702	50S ribosomal protein L6	1898421	1898963	-		rplF	similar to AA sequence:UniProtKB:A0QSG4		1	0	0	0	0	0	0
1707	PFR_JS13-1_1672	30S ribosomal protein S8	1898994	1899401	-	PROKKA_01703	30S ribosomal protein S8	1898994	1899401	-		rpsH	similar to AA sequence:UniProtKB:A0QSG3		1	0	0	0	0	0	0
1708	PFR_JS13-1_1673	30S ribosomal protein S14 type Z	1899561	1899746	-	PROKKA_01704	30S ribosomal protein S14 type Z	1899561	1899746	-		rpsZ	similar to AA sequence:UniProtKB:P54798		1	0	0	0	0	0	0
1709	PFR_JS13-1_1674	50S ribosomal protein L5	1899755	1900417	-	PROKKA_01705	50S ribosomal protein L5	1899755	1900417	-		rplE	similar to AA sequence:UniProtKB:A0QSG1		1	0	0	0	0	0	0
1710	PFR_JS13-1_1675	50S ribosomal protein L24	1900417	1900788	-	PROKKA_01706	50S ribosomal protein L24	1900417	1900788	-		rplX	similar to AA sequence:UniProtKB:P60735		1	0	0	0	0	0	0
1711	PFR_JS13-1_1676	50S ribosomal protein L14	1900790	1901161	-	PROKKA_01707	50S ribosomal protein L14	1900790	1901161	-		rplN	similar to AA sequence:UniProtKB:A0QSF9		1	0	0	0	0	0	0
1712	PFR_JS13-1_1677	30S ribosomal protein S17	1901292	1901567	-	PROKKA_01708	30S ribosomal protein S17	1901292	1901567	-		rpsQ	similar to AA sequence:UniProtKB:A0QSE0		1	0	0	0	0	0	0
1713	PFR_JS13-1_1678	50S ribosomal protein L29	1901564	1901812	-	PROKKA_01709	50S ribosomal protein L29	1901564	1901812	-		rpmC	similar to AA sequence:UniProtKB:P95057		1	0	0	0	0	0	0
1714	PFR_JS13-1_1679	50S ribosomal protein L16	1901814	1902233	-	PROKKA_01710	50S ribosomal protein L16	1901814	1902233	-		rplP	similar to AA sequence:UniProtKB:A0QSD8		1	0	0	0	0	0	0
1715	PFR_JS13-1_1680	30S ribosomal protein S3	1902239	1903057	-	PROKKA_01711	30S ribosomal protein S3	1902239	1903057	-		rpsC	similar to AA sequence:UniProtKB:P23309		1	0	0	0	0	0	0
1716	PFR_JS13-1_1681	50S ribosomal protein L22	1903060	1903545	-	PROKKA_01712	50S ribosomal protein L22	1903060	1903545	-		rplV	similar to AA sequence:UniProtKB:A0QSD6		1	0	0	0	0	0	0
1717	PFR_JS13-1_1682	30S ribosomal protein S19	1903571	1903852	-	PROKKA_01713	30S ribosomal protein S19	1903571	1903852	-		rpsS	similar to AA sequence:UniProtKB:P0A5X5		1	0	0	0	0	0	0
1718	PFR_JS13-1_1683	50S ribosomal protein L2	1903870	1904706	-	PROKKA_01714	50S ribosomal protein L2	1903870	1904706	-		rplB	similar to AA sequence:UniProtKB:A0QSD4		1	0	0	0	0	0	0
1719	PFR_JS13-1_1684	50S ribosomal protein L23	1904745	1905056	-	PROKKA_01715	50S ribosomal protein L23	1904745	1905056	-		rplW	similar to AA sequence:UniProtKB:A0QSD3		1	0	0	0	0	0	0
1720	PFR_JS13-1_1685	50S ribosomal protein L4	1905053	1905754	-	PROKKA_01716	50S ribosomal protein L4	1905053	1905754	-		rplD	similar to AA sequence:UniProtKB:A0QSD2		1	0	0	0	0	0	0
1721	PFR_JS13-1_1686	50S ribosomal protein L3	1905751	1906410	-	PROKKA_01717	50S ribosomal protein L3	1905751	1906410	-		rplC	similar to AA sequence:UniProtKB:A0QSD1		1	0	0	0	0	0	0
1722	PFR_JS13-1_1687	30S ribosomal protein S10	1906422	1906733	-	PROKKA_01718	30S ribosomal protein S10	1906422	1906733	-		rpsJ	similar to AA sequence:UniProtKB:A0QSD0		1	0	0	0	0	0	0
1723	PFR_JS13-1_1688	Aminotransferase, class IV	1907168	1908040	-	PROKKA_01719	Branched-chain-amino-acid aminotransferase	1907168	1908040	-	2.6.1.42	ilvE_2	similar to AA sequence:UniProtKB:O86428		0	0	0	0	0	0	0
1724	PFR_JS13-1_1689	Putative insertion element ISCmi2 transposase	1908190	1909185	+	PROKKA_01720	Integrase core domain protein	1908190	1909185	+			protein motif:Pfam:PF00665.20		0	0	0	0	0	0	0
1725	PFR_JS13-1_1690	Glutamate--tRNA ligase (Precursor)	1909182	1910576	-	PROKKA_01721	Glutamate--tRNA ligase	1909182	1910576	-	6.1.1.17	gltX	similar to AA sequence:UniProtKB:P27000		1	0	0	0	0	0	0
1726	PFR_JS13-1_1691	Acetyltransferase, gnlAT family	1910802	1911491	-	PROKKA_01722	Acetyltransferase (GNAT) family protein	1910802	1911491	-			protein motif:Pfam:PF00583.18		1	0	0	0	0	0	0
1727	PFR_JS13-1_1692	Membrane protein, PF09852 family	1911533	1912963	+	PROKKA_01723	hypothetical protein	1911533	1912963	+					1	0	0	0	0	0	0
1728	PFR_JS13-1_1693	Translation elongation factor Tu	1913105	1914295	-	PROKKA_01724	Elongation factor Tu	1913105	1914295	-		tuf	similar to AA sequence:UniProtKB:A0QS98		1	0	0	0	0	0	0
1729	PFR_JS13-1_1694	Translation elongation factor G	1914530	1916629	-	PROKKA_01725	Elongation factor G	1914530	1916629	-		fusA	similar to AA sequence:UniProtKB:P0A556		1	0	0	0	0	0	0
1730	PFR_JS13-1_1695	30S ribosomal protein S7	1916800	1917270	-	PROKKA_01726	30S ribosomal protein S7	1916800	1917270	-		rpsG	similar to AA sequence:UniProtKB:A0QS97		1	0	0	0	0	0	0
1731	PFR_JS13-1_1696	30S ribosomal protein S12	1917270	1917641	-	PROKKA_01727	30S ribosomal protein S12	1917270	1917641	-		rpsL	similar to AA sequence:UniProtKB:P0A4A5		1	0	0	0	0	0	0
1732	PFR_JS13-1_1697	DNA-directed RNA polymerase, beta' subunit	1918101	1921991	-	PROKKA_01728	DNA-directed RNA polymerase subunit beta'	1918101	1921991	-	2.7.7.6	rpoC	similar to AA sequence:UniProtKB:A0QS66		1	0	0	0	0	0	0
1733	PFR_JS13-1_1698	DNA-directed RNA polymerase, beta subunit	1922093	1925569	-	PROKKA_01729	DNA-directed RNA polymerase subunit beta	1922093	1925569	-	2.7.7.6	rpoB	similar to AA sequence:UniProtKB:Q9L0L0		1	0	0	0	0	0	0
1734	PFR_JS13-1_1699	Hypothetical protein	1925895	1926521	-	PROKKA_01730	hypothetical protein	1925895	1926521	-					1	0	0	0	0	0	0
1735	PFR_JS13-1_1700	LSU ribosomal protein L7/L12 (P1/P2)	1926792	1927187	-	PROKKA_01731	50S ribosomal protein L7/L12	1926792	1927187	-		rplL	similar to AA sequence:UniProtKB:Q8NT28		1	0	0	0	0	0	0
1736	PFR_JS13-1_1701	50S ribosomal protein L10	1927204	1927851	-	PROKKA_01732	50S ribosomal protein L10	1927204	1927851	-		rplJ	similar to AA sequence:UniProtKB:A0QS62		1	0	0	0	0	0	0
1737	PFR_JS13-1_1702	Lipoyl synthase	1928221	1929171	-	PROKKA_01733	Lipoyl synthase	1928221	1929171	-	2.8.1.8	lipA	similar to AA sequence:UniProtKB:A8I4L8		1	0	0	0	0	0	0
1738	PFR_JS13-1_1703	Octanoyltransferase	1929168	1930040	-	PROKKA_01734	Octanoyltransferase	1929168	1930040	-	2.3.1.181	lipB	similar to AA sequence:UniProtKB:Q10404		1	0	0	0	0	0	0
1739	PFR_JS13-1_1704	50S ribosomal protein L1	1930207	1930917	-	PROKKA_01735	50S ribosomal protein L1	1930207	1930917	-		rplA	similar to AA sequence:UniProtKB:A0QS46		1	0	0	0	0	0	0
1740	PFR_JS13-1_1705	50S ribosomal protein L11	1931039	1931467	-	PROKKA_01736	50S ribosomal protein L11	1931039	1931467	-		rplK	similar to AA sequence:UniProtKB:A0QS45		1	0	0	0	0	0	0
1741	PFR_JS13-1_1706	Transcription antitermination protein nusG	1931577	1932464	-	PROKKA_01737	hypothetical protein	1931577	1932464	-			similar to AA sequence:UniProtKB:P27309	Transcription termination/antitermination protein NusG	1	0	0	0	0	0	0
1742	PFR_JS13-1_1707	Putative SecE/Sec61-gamma subunit of protein	1932484	1933071	-	PROKKA_01738	preprotein translocase subunit SecE	1932484	1933071	-			protein motif:CLUSTERS:PRK07597		1	0	0	0	0	0	0
1743						PROKKA_01739	tRNA-Trp(cca)	1933240	1933313	-			COORDINATES:profile:Aragorn:1.2		0					0	0
1744	PFR_JS13-1_1708	Hypothetical protein	1933504	1934988	-	PROKKA_01740	hypothetical protein	1933504	1934988	-					1	0	0	0	0	0	0
1745	PFR_JS13-1_1709	UDP-N-acetylenolpyruvoylglucosamine reductase	1935010	1936143	-	PROKKA_01741	UDP-N-acetylenolpyruvoylglucosamine reductase	1935010	1936143	-	1.3.1.98	murB	similar to AA sequence:UniProtKB:Q9HZM7		1	0	0	0	0	0	0
1746	PFR_JS13-1_1710	MaoC-like protein	1936213	1936644	-	PROKKA_01742	MaoC like domain protein	1936213	1936644	-			protein motif:Pfam:PF01575.13		1	0	0	0	0	0	0
1747	PFR_JS13-1_1711	UPF0336 protein	1936641	1937075	-	PROKKA_01743	hypothetical protein	1936641	1937075	-					1	0	0	0	0	0	0
1748	PFR_JS13-1_1712	50S ribosomal protein L33	1937223	1937393	-	PROKKA_01744	50S ribosomal protein L33 1	1937223	1937393	-		rpmGA	similar to AA sequence:UniProtKB:P23375		1	0	0	0	0	0	0
1749						PROKKA_01745	tRNA-Met(cat)	1937522	1937596	-			COORDINATES:profile:Aragorn:1.2		0					0	0
1750						PROKKA_01746	tRNA-Thr(ggt)	1937674	1937747	-			COORDINATES:profile:Aragorn:1.2		0					0	0
1751	PFR_JS13-1_1713	Alkyl hydroperoxide reductase, F subunit	1937792	1939447	-	PROKKA_01747	NADH dehydrogenase	1937792	1939447	-	1.6.99.3	ahpF	similar to AA sequence:UniProtKB:P26829		1	0	0	0	0	0	0
1752	PFR_JS13-1_1714	Alkyl hydroperoxide reductase, C22 subunit,	1939671	1940234	-	PROKKA_01748	Alkyl hydroperoxide reductase subunit C	1939671	1940234	-	1.11.1.15	ahpC	similar to AA sequence:UniProtKB:P80239		1	0	0	0	0	0	0
1753						PROKKA_01749	tRNA-Tyr(gta)	1940577	1940660	-			COORDINATES:profile:Aragorn:1.2		0					0	0
1754	PFR_JS13-1_1715	Hypothetical protein	1940758	1941252	-	PROKKA_01750	hypothetical protein	1940758	1941252	-					1	0	0	0	0	0	0
1755	PFR_JS13-1_1716	Exodeoxyribonuclease	1941331	1942272	+	PROKKA_01751	Exodeoxyribonuclease	1941331	1942272	+	3.1.11.2	exoA	similar to AA sequence:UniProtKB:P37454		1	0	0	0	0	0	0
1756	PFR_JS13-1_1717	Hypothetical protein	1942331	1942717	-	PROKKA_01752	hypothetical protein	1942331	1942717	-					1	0	0	0	0	0	0
1757	PFR_JS13-1_1718	Mannosyltransferase MptA	1942884	1944473	-	PROKKA_01753	hypothetical protein	1942884	1944473	-					1	0	0	0	0	0	0
1758	PFR_JS13-1_1719	Ferredoxin oxidoreductase, alpha subunit	1944645	1946534	+	PROKKA_01754	2-oxoglutarate oxidoreductase subunit KorA	1944645	1946534	+	1.2.-.-	korA	similar to AA sequence:UniProtKB:O53182		1	0	0	0	0	0	0
1759	PFR_JS13-1_1720	2-oxoglutarate ferredoxin oxidoreductase subunit	1946531	1947610	+	PROKKA_01755	2-oxoglutarate oxidoreductase subunit KorB	1946531	1947610	+	1.2.-.-	korB	similar to AA sequence:UniProtKB:O53181		1	0	0	0	0	0	0
1760	PFR_JS13-1_1721	Peptidase family M13	1947740	1949713	+	PROKKA_01756	Neutral endopeptidase	1947740	1949713	+	3.4.24.-	pepO	similar to AA sequence:UniProtKB:Q07744		1	0	0	0	0	0	0
1761	PFR_JS13-1_1722	Hypothetical protein	1949801	1951006	+	PROKKA_01757	Inner membrane protein YhaI	1949801	1951006	+		yhaI	similar to AA sequence:UniProtKB:P64592		1	0	0	0	0	0	0
1762	PFR_JS13-1_1723	Inner membrane protein YhaI	1951079	1951534	+	PROKKA_01758	Inner membrane protein YhaH	1951079	1951534	+		yhaH	similar to AA sequence:UniProtKB:P64590		1	0	0	0	0	0	0
1763	PFR_JS13-1_1724	Polyprenyl synthetase	1951664	1952641	-	PROKKA_01759	Heptaprenyl diphosphate synthase component 2	1951664	1952641	-	2.5.1.30	hepT	similar to AA sequence:UniProtKB:P31114		1	0	0	0	0	0	0
1764	PFR_JS13-1_1725	NADH-quinone oxidoreductase subunit N	1952655	1954211	-	PROKKA_01760	NADH-quinone oxidoreductase subunit N	1952655	1954211	-	1.6.99.5	nuoN	similar to AA sequence:UniProtKB:P0AFF0		1	0	0	0	0	0	0
1765	PFR_JS13-1_1726	NADH dehydrogenase subunit M	1954215	1955756	-	PROKKA_01761	NADH-quinone oxidoreductase subunit M	1954215	1955756	-	1.6.99.5	nuoM	similar to AA sequence:UniProtKB:P0AFE8		1	0	0	0	0	0	0
1766	PFR_JS13-1_1727	NADH dehydrogenase subunit L	1955771	1957678	-	PROKKA_01762	NADH-quinone oxidoreductase subunit 12	1955771	1957678	-	1.6.99.5		similar to AA sequence:UniProtKB:Q56227		1	0	0	0	0	0	0
1767	PFR_JS13-1_1728	NADH-quinone oxidoreductase subunit K	1957689	1957988	-	PROKKA_01763	NADH-quinone oxidoreductase subunit 11	1957689	1957988	-	1.6.99.5		similar to AA sequence:UniProtKB:Q56226		1	0	0	0	0	0	0
1768	PFR_JS13-1_1729	NADH-ubiquinone/plastoquinone oxidoreductase	1957985	1958854	-	PROKKA_01764	NADH-quinone oxidoreductase subunit J	1957985	1958854	-	1.6.99.5	nuoJ	similar to AA sequence:UniProtKB:P0AFE0		1	0	0	0	0	0	0
1769	PFR_JS13-1_1730	NADH-quinone oxidoreductase subunit I	1958851	1959423	-	PROKKA_01765	NADH-quinone oxidoreductase subunit 9	1958851	1959423	-	1.6.99.5	nqo9	similar to AA sequence:UniProtKB:Q56224		1	0	0	0	0	0	0
1770	PFR_JS13-1_1731	NADH-quinone oxidoreductase subunit H	1959424	1960794	-	PROKKA_01766	NADH-quinone oxidoreductase subunit H	1959424	1960794	-	1.6.99.5	nuoH	similar to AA sequence:UniProtKB:P42032		1	0	0	0	0	0	0
1771	PFR_JS13-1_1732	NADH dehydrogenase, G subunit	1960791	1963202	-	PROKKA_01767	NADH-quinone oxidoreductase chain 3	1960791	1963202	-	1.6.99.5	nqo3	similar to AA sequence:UniProtKB:P29915		1	0	0	0	0	0	0
1772	PFR_JS13-1_1733	NADH oxidoreductase, F subunit	1963199	1964539	-	PROKKA_01768	NADH-quinone oxidoreductase subunit 1	1963199	1964539	-	1.6.99.5	nqo1	similar to AA sequence:UniProtKB:Q56222		1	0	0	0	0	0	0
1773	PFR_JS13-1_1734	NADH dehydrogenase subunit E	1964536	1965267	-	PROKKA_01769	NADH-quinone oxidoreductase subunit E	1964536	1965267	-	1.6.99.5	nuoE	similar to AA sequence:UniProtKB:P65573		1	0	0	0	0	0	0
1774	PFR_JS13-1_1735	NADH-quinone oxidoreductase subunit D	1965323	1966696	-	PROKKA_01770	NADH-quinone oxidoreductase subunit 4	1965323	1966696	-	1.6.99.5	nqo4	similar to AA sequence:UniProtKB:Q56220		1	0	0	0	0	0	0
1775	PFR_JS13-1_1736	NADH-quinone oxidoreductase subunit C	1966693	1967460	-	PROKKA_01771	NADH-quinone oxidoreductase subunit C 1	1966693	1967460	-	1.6.99.5	nuoC1	similar to AA sequence:UniProtKB:O68854		1	0	0	0	0	0	0
1776	PFR_JS13-1_1737	NADH-quinone oxidoreductase subunit B	1967457	1968014	-	PROKKA_01772	NADH-quinone oxidoreductase subunit 6	1967457	1968014	-	1.6.99.5	nqo6	similar to AA sequence:UniProtKB:Q56218		1	0	0	0	0	0	0
1777	PFR_JS13-1_1738	NADH-quinone oxidoreductase subunit A	1968033	1968398	-	PROKKA_01773	NAD(P)H-quinone oxidoreductase subunit 3	1968033	1968398	-	1.6.5.-	ndhC	similar to AA sequence:UniProtKB:P19045		1	0	0	0	0	0	0
1778	PFR_JS13-1_1739	Geranylgeranyl reductase family protein	1968455	1969786	-	PROKKA_01774	Putative oxidoreductase/MT0587	1968455	1969786	-	1.-.-.-		similar to AA sequence:UniProtKB:O06427		1	0	0	0	0	0	0
1779	PFR_JS13-1_1740	Chorismate binding enzyme	1970132	1971370	+	PROKKA_01775	Isochorismate synthase DhbC	1970132	1971370	+	5.4.4.2	dhbC	similar to AA sequence:UniProtKB:P45744		1	0	0	0	0	0	0
1780	PFR_JS13-1_1741	ABC transporter, permease protein	1971416	1973221	-	PROKKA_01776	hypothetical protein	1971416	1973221	-					1	0	0	0	0	0	0
1781	PFR_JS13-1_1742	Heme ABC exporter, ATP-binding protein CcmA	1973218	1973910	-	PROKKA_01777	SkfA peptide export ATP-binding protein SkfE	1973218	1973910	-	3.6.3.25	skfE	similar to AA sequence:UniProtKB:O31427		1	0	0	0	0	0	0
1782	PFR_JS13-1_1743	Demethylmenaquinone methyltransferase	1974078	1974725	+	PROKKA_01778	Ubiquinone/menaquinone biosynthesis C-methyltransferase UbiE	1974078	1974725	+	2.1.1.163	ubiE_2	similar to AA sequence:UniProtKB:P0A887		1	0	0	0	0	0	0
1783	PFR_JS13-1_1744	Nuclease, RecB family	1974852	1976621	+	PROKKA_01779	hypothetical protein	1974852	1976621	+					1	0	0	0	0	0	0
1784	PFR_JS13-1_1745	1,4-dihydroxy-2-naphthoate octaprenyltransferase	1976638	1977519	-	PROKKA_01780	1,4-dihydroxy-2-naphthoate octaprenyltransferase	1976638	1977519	-	2.5.1.74	menA	similar to AA sequence:UniProtKB:P32166		1	0	0	0	0	0	0
1785	PFR_JS13-1_1746	Hypothetical protein	1977700	1977954	+	PROKKA_01781	hypothetical protein	1977700	1977954	+					1	0	0	0	0	0	0
1786	PFR_JS13-1_1747	Transporter, major facilitator family protein	1978291	1979577	+	PROKKA_01782	enterobactin exporter EntS	1978291	1979577	+			protein motif:CLUSTERS:PRK10489	Putative antibiotic resistance	1	0	0	0	0	0	0
1787	PFR_JS13-1_1748	Hypothetical protein	1979740	1980138	+	PROKKA_01783	PRC-barrel domain protein	1979740	1980138	+			protein motif:Pfam:PF05239.10		1	0	0	0	0	0	0
1788	PFR_JS13-1_1749	Cytidine and deoxycytidylate deaminase	1980164	1980628	-	PROKKA_01784	Riboflavin biosynthesis protein RibD	1980164	1980628	-		ribD_2	similar to AA sequence:UniProtKB:P25539		1	0	0	0	0	0	0
1789	PFR_JS13-1_1750	Cation diffusion facilitator family transporter	1980657	1981625	-	PROKKA_01785	Ferrous-iron efflux pump FieF	1980657	1981625	-		fieF	similar to AA sequence:UniProtKB:P69380		1	0	0	0	0	0	0
1790	PFR_JS13-1_1751	Phospholipase, patatin family	1981772	1983361	+	PROKKA_01786	hypothetical protein	1981772	1983361	+			protein motif:CLUSTERS:PRK10279		1	0	0	0	0	0	0
1791	PFR_JS13-1_1752	Hypothetical protein	1983467	1983814	+	PROKKA_01787	hypothetical protein	1983467	1983814	+					0	0	0	0	0	0	0
1792	PFR_JS13-1_1753	Hypothetical protein	1983935	1984594	+	PROKKA_01788	hypothetical protein	1983935	1984594	+					1	0	0	0	0	0	0
1793	PFR_JS13-1_1754	Transaldolase	1984793	1985875	+	PROKKA_01789	Transaldolase	1984793	1985875	+	2.2.1.2	tal_2	similar to AA sequence:UniProtKB:A0QWX9		1	0	0	0	0	0	0
1794	PFR_JS13-1_1755	Hypothetical protein	1986186	1986566	+	PROKKA_01790	hypothetical protein	1986186	1986566	+					1	0	0	0	0	0	0
1795	PFR_JS13-1_1756	Zinc-binding dehydrogenase family oxidoreductase	1986884	1987909	+	PROKKA_01791	NADP-dependent isopropanol dehydrogenase	1986884	1987909	+	1.1.1.80	adh_2	similar to AA sequence:UniProtKB:P14941		1	0	0	0	0	0	0
1796	PFR_JS13-1_1757	Ketopantoate reductase protein	1987906	1988871	+	PROKKA_01792	2-dehydropantoate 2-reductase	1987906	1988871	+	1.1.1.169	panE	similar to AA sequence:UniProtKB:P0A9J4		0	0	0	0	0	0	0
1797	PFR_JS13-1_1758	Aspartate/tyrosine/aromatic aminotransferase	1988934	1990100	+	PROKKA_01793	Putative N-acetyl-LL-diaminopimelate aminotransferase	1988934	1990100	+	2.6.1.-	patA	similar to AA sequence:UniProtKB:P16524		1	0	0	0	0	0	0
1798						PROKKA_01794	tRNA-Ala(agc)	1991818	1991909	-			COORDINATES:profile:Aragorn:1.2		0					0	0
1799	PFR_JS13-1_1759	Heavy metal-transporting ATPase	1990238	1992109	-											0	0	0	0	0	0
1800	PFR_JS13-1_1760	HTH-type transcriptional regulator CmtR	1992106	1992531	-	PROKKA_01795	HTH-type transcriptional regulator KmtR	1992106	1992531	-		kmtR	similar to AA sequence:UniProtKB:O53838		1	0	0	0	0	0	0
1801						PROKKA_01796	tRNA-Lys(ttt)	1992885	1992958	-			COORDINATES:profile:Aragorn:1.2		0					0	0
1802	PFR_JS13-1_1761	Transcriptional regulator	1993097	1993864	-	PROKKA_01797	A-factor receptor protein	1993097	1993864	-		arpA	similar to AA sequence:UniProtKB:Q9ZN78		1	0	0	0	0	0	0
1803	PFR_JS13-1_1762	ABC transport ATP-binding subunit	1994033	1995073	+	PROKKA_01798	Daunorubicin/doxorubicin resistance ATP-binding protein DrrA	1994033	1995073	+	3.6.3.-	drrA_5	similar to AA sequence:UniProtKB:P32010		0	0	0	0	0	0	0
1804	PFR_JS13-1_1763	ABC transporter, permease protein	1995070	1995876	+	PROKKA_01799	ABC-2 type transporter	1995070	1995876	+			protein motif:Pfam:PF01061.18		1	0	0	0	0	0	0
1805	PFR_JS13-1_1764	Hypothetical protein	1996314	1998059	+	PROKKA_01800	putative endopeptidase precursor	1996314	1998059	+	3.4.-.-		similar to AA sequence:UniProtKB:A4QFQ3		0	0	0	0	0	0	0
1806						PROKKA_01801	tRNA-Glu(ttc)	1998174	1998247	+			COORDINATES:profile:Aragorn:1.2		0					0	0
1807						PROKKA_01802	tRNA-Asp(gtc)	1998448	1998522	+			COORDINATES:profile:Aragorn:1.2		0					0	0
1808						PROKKA_01803	tRNA-Phe(gaa)	1998535	1998609	+			COORDINATES:profile:Aragorn:1.2		0					0	0
1809	PFR_JS13-1_1765	Domain family protein, hydrolase, alpha/beta fold	1998778	1999860	-	PROKKA_01804	Alpha/beta hydrolase family protein	1998778	1999860	-			protein motif:Pfam:PF12697.1		1	0	0	0	0	0	0
1810	PFR_JS13-1_1766	Hypothetical protein	2000112	2000342	-	PROKKA_01805	hypothetical protein	2000112	2000342	-					1	0	0	0	0	0	0
1811	PFR_JS13-1_1767	Phosphoribosylformylglycinamidine cyclo-ligase	2000576	2001637	-	PROKKA_01806	Phosphoribosylformylglycinamidine cyclo-ligase	2000576	2001637	-	6.3.3.1	purM	similar to AA sequence:UniProtKB:Q9KPY6		1	0	0	0	0	0	0
1812	PFR_JS13-1_1768	Amidophosphoribosyltransferase	2001634	2003175	-	PROKKA_01807	Amidophosphoribosyltransferase precursor	2001634	2003175	-	2.4.2.14	purF	similar to AA sequence:UniProtKB:P00497		1	0	0	0	0	0	0
1813	PFR_JS13-1_1769	Hypothetical protein	2003276	2004115	-	PROKKA_01808	hypothetical protein	2003276	2004115	-					1	0	0	0	0	0	0
1814	PFR_JS13-1_1770	UPF0237 protein	2004385	2004654	+	PROKKA_01809	hypothetical protein	2004385	2004654	+			protein motif:CLUSTERS:PRK00194		1	0	0	0	0	0	0
1815	PFR_JS13-1_1771	UPF0210 protein	2004658	2006007	+	PROKKA_01810	hypothetical protein	2004658	2006007	+			protein motif:CLUSTERS:PRK05313		1	0	0	0	0	0	0
1816	PFR_JS13-1_1772	Chloramphenicol phosphotransferase family	2006066	2006635	+	PROKKA_01811	Chromatin associated protein KTI12	2006066	2006635	+			protein motif:Pfam:PF08433.4		1	0	0	0	0	0	0
1817	PFR_JS13-1_1773	Formate-tetrahydrofolate ligase	2006737	2008413	-	PROKKA_01812	Formate--tetrahydrofolate ligase	2006737	2008413	-	6.3.4.3	fhs	similar to AA sequence:UniProtKB:Q2RM91		1	0	0	0	0	0	0
1818	PFR_JS13-1_1774	Hypothetical protein	2008544	2009032	-	PROKKA_01813	hypothetical protein	2008544	2009032	-					1	0	0	0	0	0	0
1819	PFR_JS13-1_1775	Hypothetical protein	2009032	2009520	-	PROKKA_01814	hypothetical protein	2009032	2009520	-			protein motif:CLUSTERS:PRK07907		0	0	0	0	0	0	0
1820	PFR_JS13-1_1776	Acetylornithine	2009493	2010377	-	PROKKA_01815	Succinyl-diaminopimelate desuccinylase	2009493	2010377	-	3.5.1.18	dapE_2	similar to AA sequence:UniProtKB:Q9JYL2		0	0	0	0	0	0	0
1821	PFR_JS13-1_1777	Phosphoribosylformylglycinamidine synthase 2	2010382	2012646	-	PROKKA_01816	Phosphoribosylformylglycinamidine synthase 2	2010382	2012646	-	6.3.5.3	purL	similar to AA sequence:UniProtKB:A6X1J9		1	0	0	0	0	0	0
1822	PFR_JS13-1_1778	ATPase BadF/BadG/BcrA/BcrD type	2012947	2013903	+	PROKKA_01817	BadF/BadG/BcrA/BcrD ATPase family protein	2012947	2013903	+			protein motif:Pfam:PF01869.14		1	0	0	0	0	0	0
1823	PFR_JS13-1_1779	Transcriptional regulator HspR	2014062	2014496	-	PROKKA_01818	Putative heat shock protein HspR	2014062	2014496	-		hspR	similar to AA sequence:UniProtKB:P40183		1	0	0	0	0	0	0
1824	PFR_JS13-1_1780	Chaperone protein DnaJ 1	2014589	2015761	-	PROKKA_01819	Chaperone protein DnaJ	2014589	2015761	-		dnaJ_2	similar to AA sequence:UniProtKB:P08622		1	0	0	0	0	0	0
1825	PFR_JS13-1_1781	Protein GrpE	2015823	2016473	-	PROKKA_01820	heat shock protein GrpE	2015823	2016473	-			protein motif:CLUSTERS:PRK10325		1	0	0	0	0	0	0
1826	PFR_JS13-1_1782	Chaperone protein DnaK	2016638	2018512	-	PROKKA_01821	Chaperone protein DnaK	2016638	2018512	-		dnaK_2	similar to AA sequence:UniProtKB:Q8NLY6		1	0	0	0	0	0	0
1827	PFR_JS13-1_1783	6-phosphogluconate dehydrogenase, decarboxylating	2018920	2019810	-	PROKKA_01822	6-phosphogluconate dehydrogenase, NAD(+)-dependent, decarboxylating	2018920	2019810	-	1.1.1.343	gntZ	similar to AA sequence:UniProtKB:P12013		1	0	0	0	0	0	0
1828	PFR_JS13-1_1784	Gluconate permease	2019968	2021311	-	PROKKA_01823	Gnt-II system L-idonate transporter	2019968	2021311	-		idnT	similar to AA sequence:UniProtKB:P39344		1	0	0	0	0	0	0
1829	PFR_JS13-1_1785	Hypothetical protein	2021327	2021455	-	PROKKA_01824	hypothetical protein	2021327	2021455	-					0	0	0	0	0	0	0
1830	PFR_JS13-1_1786	GntR domain protein	2021660	2022424	+	PROKKA_01825	transcriptional regulator NanR	2021660	2022424	+			protein motif:CLUSTERS:PRK03837		1	0	0	0	0	0	0
1831	PFR_JS13-1_1787	Cobalt transport protein CbiM	2022734	2023441	+	PROKKA_01826	Cobalt transport protein CbiM	2022734	2023441	+		cbiM	similar to AA sequence:UniProtKB:D5AUZ9		1	0	0	0	0	0	0
1832	PFR_JS13-1_1788	Cobalt transport protein CbiN	2023434	2023934	+	PROKKA_01827	Cobalt transport protein CbiN	2023434	2023934	+		cbiN	similar to AA sequence:UniProtKB:Q05595		1	0	0	0	0	0	0
1833	PFR_JS13-1_1789	Cobalt ABC transporter, permease protein CbiQ	2023938	2024732	+	PROKKA_01828	Cobalt transport protein CbiQ	2023938	2024732	+		cbiQ	similar to AA sequence:UniProtKB:D5AUZ7		1	0	0	0	0	0	0
1834	PFR_JS13-1_1790	Putative ABC transporter ATP-binding protein in	2024729	2025622	+	PROKKA_01829	Energy-coupling factor transporter ATP-binding protein EcfA3	2024729	2025622	+	3.6.3.-	ecfA3	similar to AA sequence:UniProtKB:Q0TUN8		1	0	0	0	0	0	0
1835	PFR_JS13-1_1791	Putative uroporphyrinogen III methyltransferase	2025619	2026392	+	PROKKA_01830	Siroheme synthase	2025619	2026392	+		cysG	similar to AA sequence:UniProtKB:P25924		1	0	0	0	0	0	0
1836	PFR_JS13-1_1792	Putative ATP-dependent helicase HrpB	2026431	2029052	+	PROKKA_01831	ATP-dependent RNA helicase HrpB	2026431	2029052	+	3.6.4.13	hrpB_2	similar to AA sequence:UniProtKB:P37024		1	0	0	0	0	0	0
1837	PFR_JS13-1_1793	Membrane protein, PF10081 family	2029143	2031002	+	PROKKA_01832	hypothetical protein	2029143	2031002	+					1	0	0	0	0	0	0
1838	PFR_JS13-1_1794	Azoreductase B	2031054	2031665	-	PROKKA_01833	NmrA-like family protein	2031054	2031665	-			protein motif:Pfam:PF05368.7		1	0	0	0	0	0	0
1839	PFR_JS13-1_1795	Azoreductase B	2031671	2032282	-	PROKKA_01834	hypothetical protein	2031671	2032282	-					1	0	0	0	0	0	0
1840	PFR_JS13-1_1796	Hypothetical protein	2032519	2032749	-	PROKKA_01835	hypothetical protein	2032519	2032749	-					1	0	0	0	0	0	0
1841	PFR_JS13-1_1797	Phosphate transporter family protein	2032746	2034017	-	PROKKA_01836	Low-affinity inorganic phosphate transporter 1	2032746	2034017	-		pitA	similar to AA sequence:UniProtKB:P0AFJ7		1	0	0	0	0	0	0
1842	PFR_JS13-1_1798	VPDSG-CTERM exosortase interaction domain	2034229	2034975	-	PROKKA_01837	hypothetical protein	2034229	2034975	-					0	0	0	0	0	0	0
1843	PFR_JS13-1_1799	Transcriptional regulator, MarR family	2035371	2036030	+	PROKKA_01838	MarR family protein	2035371	2036030	+			protein motif:Pfam:PF12802.1		1	0	0	0	0	0	0
1844	PFR_JS13-1_1800	Hypothetical protein	2036011	2036385	-	PROKKA_01839	SnoaL-like domain protein	2036011	2036385	-			protein motif:Pfam:PF12680.1		1	0	0	0	0	0	0
1845	PFR_JS13-1_1801	Putative monovalent cation/proton antiporter	2036503	2038359	+	PROKKA_01840	Sodium, potassium, lithium and rubidium/H(+) antiporter	2036503	2038359	+		nhaK	similar to AA sequence:UniProtKB:O32212		1	0	0	0	0	0	0
1846	PFR_JS13-1_1802	Pyruvate oxidase	2038502	2040259	+	PROKKA_01841	Pyruvate oxidase	2038502	2040259	+	1.2.3.3	pox5	similar to AA sequence:UniProtKB:P37063		1	0	0	0	0	0	0
1847	PFR_JS13-1_1803	Hypothetical protein	2040630	2041070	+	PROKKA_01842	hypothetical protein	2040630	2041070	+					0	0	0	0	0	0	0
1848	PFR_JS13-1_1804	Hypothetical protein	2041319	2042059	+	PROKKA_01843	hypothetical protein	2041319	2042059	+					0	0	0	0	0	0	0
1849	PFR_JS13-1_1805	Hypothetical protein	2041993	2042364	-	PROKKA_01844	hypothetical protein	2041993	2042364	-					1	0	0	0	0	0	0
1850	PFR_JS13-1_1806	PAS domain S-box	2042602	2044410	-	PROKKA_01845	Aerotaxis receptor	2042602	2044410	-		aer	similar to AA sequence:UniProtKB:P50466		1	0	0	0	0	0	0
1851	PFR_JS13-1_1807	Adenosine deaminase	2044593	2045810	+	PROKKA_01846	Aminodeoxyfutalosine deaminase	2044593	2045810	+	3.5.4.-		similar to AA sequence:UniProtKB:O86737		1	0	0	0	0	0	0
1852	PFR_JS13-1_1808	Nuclease SbcCD, D subunit	2045761	2047041	+	PROKKA_01847	Nuclease SbcCD subunit D	2045761	2047041	+		sbcD	similar to AA sequence:UniProtKB:P0AG76		1	0	0	0	0	0	0
1853	PFR_JS13-1_1809	ATP-dependent dsDNA exonuclease SbcC	2047041	2050205	+	PROKKA_01848	Nuclease SbcCD subunit C	2047041	2050205	+		sbcC	similar to AA sequence:UniProtKB:Q7A5S6		1	0	0	0	0	0	0
1854	PFR_JS13-1_1810	Hypothetical protein	2050230	2050730	-	PROKKA_01849	hypothetical protein	2050230	2050730	-					1	0	0	0	0	0	0
1855	PFR_JS13-1_1811	Carboxylic ester hydrolase	2050727	2051917	-	PROKKA_01850	Alpha/beta hydrolase family protein	2050727	2051917	-			protein motif:Pfam:PF12697.1	Secreted esterase	1	0	0	0	0	0	0
1856	PFR_JS13-1_1812	Acyl-CoA dehydrogenase type 2 domain protein	2052442	2053590	+	PROKKA_01851	Putative acyl-CoA dehydrogenase YdbM	2052442	2053590	+	1.3.99.-	ydbM	similar to AA sequence:UniProtKB:P96608		1	0	0	0	0	0	0
1857	PFR_JS13-1_1813	FAD linked oxidase protein	2053753	2056539	-	PROKKA_01852	putative FAD-linked oxidoreductase	2053753	2056539	-	1.-.-.-		similar to AA sequence:UniProtKB:Q50685		1	0	0	0	0	0	0
1858	PFR_JS13-1_1814	UPF0214 protein YfeW	2056933	2058210	-	PROKKA_01853	Penicillin-binding protein 4*	2056933	2058210	-		pbpE	similar to AA sequence:UniProtKB:P32959		1	0	0	0	0	0	0
1859	PFR_JS13-1_1815	OmpA family membrane associated protein	2058207	2058992	-	PROKKA_01854	vancomycin high temperature exclusion protein	2058207	2058992	-			protein motif:CLUSTERS:PRK10834	Putative antibiotic resistance	0	0	0	0	0	0	0
1860	PFR_JS13-1_1816	Glucose-6-phosphate isomerase 2	2058996	2060678	-	PROKKA_01855	Glucose-6-phosphate isomerase	2058996	2060678	-	5.3.1.9	pgi	similar to AA sequence:UniProtKB:P64192		1	0	0	0	0	0	0
1861	PFR_JS13-1_1817	Hypothetical protein	2060870	2061715	-	PROKKA_01856	putative endopeptidase precursor	2060870	2061715	-	3.4.-.-		similar to AA sequence:UniProtKB:A4QFQ3		1	0	0	0	0	0	0
1862	PFR_JS13-1_1818	2-keto-3-deoxy-6-phosphogluconate aldolase	2062100	2062798	-	PROKKA_01857	keto-hydroxyglutarate-aldolase/keto-deoxy-phosphogluconate aldolase	2062100	2062798	-			protein motif:CLUSTERS:PRK07455		1	0	0	0	0	0	0
1863	PFR_JS13-1_1819	DEAD/DEAH box helicase	2062935	2065487	+	PROKKA_01858	ski2-like helicase	2062935	2065487	+			protein motif:CLUSTERS:PRK02362		0	0	0	0	0	0	0
1864	PFR_JS13-1_1820	Putative kinase inhibitor protein	2065521	2065985	+	PROKKA_01859	putative kinase inhibitor protein	2065521	2065985	+			protein motif:CLUSTERS:PRK10257		0	0	0	0	0	0	0
1865	PFR_JS13-1_1821	Cutinase	2066131	2067369	+	PROKKA_01860	Cutinase	2066131	2067369	+			protein motif:Pfam:PF01083.16	Anchored esterase	1	0	0	0	0	0	0
1866	PFR_JS13-1_1822	Hypothetical protein	2067891	2068589	-	PROKKA_01861	hypothetical protein	2067891	2068589	-					1	0	0	0	0	0	0
1867						PROKKA_01862	tRNA-Ser(cag)	2068720	2068804	+			COORDINATES:profile:Aragorn:1.2		0					0	0
1868	PFR_JS13-1_1823	Hypothetical protein	2069581	2070243	+	PROKKA_01863	Excalibur calcium-binding domain protein	2069581	2070243	+			protein motif:Pfam:PF05901.5		0	0	0	0	0	0	0
1869	PFR_JS13-1_1824	Hypothetical protein	2071472	2071990	+	PROKKA_01864	hypothetical protein	2071472	2071990	+					0	0	0	0	0	0	0
1870	PFR_JS13-1_1825	Hypothetical protein	2072031	2072261	-	PROKKA_01865	hypothetical protein	2072031	2072261	-					0	0	0	0	0	0	0
1871	PFR_JS13-1_1826	Hypothetical protein	2072706	2073515	-	PROKKA_01866	hypothetical protein	2072706	2073515	-					0	0	0	0	0	0	0
1872	PFR_JS13-1_1827	Hypothetical protein	2073943	2074878	+	PROKKA_01867	hypothetical protein	2073943	2074878	+					0	0	0	0	0	0	0
1873	PFR_JS13-1_1828	Polyol permease	2074964	2076247	-	PROKKA_01868	Alpha-ketoglutarate permease	2074964	2076247	-		csbX	similar to AA sequence:UniProtKB:O05390		1	0	0	0	0	0	0
1874	PFR_JS13-1_1829	Hypothetical protein	2076599	2077297	+	PROKKA_01869	Host cell surface-exposed lipoprotein	2076599	2077297	+			protein motif:Pfam:PF07553.5		1	0	0	0	0	0	0
1875	PFR_JS13-1_1830	Phosphoribosylformylglycinamidine synthase 1	2077376	2078053	-	PROKKA_01870	Phosphoribosylformylglycinamidine synthase 1	2077376	2078053	-	6.3.5.3	purQ	similar to AA sequence:UniProtKB:Q8NMI4		1	0	0	0	0	0	0
1876	PFR_JS13-1_1831	Phosphoribosylformylglycinamidine synthase	2078055	2078306	-	PROKKA_01871	phosphoribosylformylglycinamidine synthase subunit PurS	2078055	2078306	-			protein motif:CLUSTERS:PRK05974		1	0	0	0	0	0	0
1877	PFR_JS13-1_1832	Phosphoribosylaminoimidazole-succinocarboxamidesy	2078383	2079261	-	PROKKA_01872	Phosphoribosylaminoimidazole-succinocarboxamide synthase	2078383	2079261	-	6.3.2.6	purC	similar to AA sequence:UniProtKB:A0R4I0		1	0	0	0	0	0	0
1878	PFR_JS13-1_1833	Hypothetical protein	2079359	2080465	+	PROKKA_01873	hypothetical protein	2079359	2080465	+					1	0	0	0	0	0	0
1879	PFR_JS13-1_1834	Adenylosuccinate lyase	2080475	2081908	-	PROKKA_01874	Adenylosuccinate lyase	2080475	2081908	-	4.3.2.2	purB	similar to AA sequence:UniProtKB:Q9X0I0		1	0	0	0	0	0	0
1880	PFR_JS13-1_1835	Phosphoribosylamine--glycine ligase (Precursor)	2081937	2083190	-	PROKKA_01875	Phosphoribosylamine--glycine ligase	2081937	2083190	-	6.3.4.13	purD	similar to AA sequence:UniProtKB:Q92RL0		1	0	0	0	0	0	0
1881	PFR_JS13-1_1836	YidE/YbjL duplication	2083451	2085019	+	PROKKA_01876	Aspartate/alanine antiporter	2083451	2085019	+		aspT	similar to AA sequence:UniProtKB:Q8L3K8		0	0	0	0	0	0	0
1882	PFR_JS13-1_1837	Hypothetical protein	2085544	2086260	-	PROKKA_01877	hypothetical protein	2085544	2086260	-					0	0	0	0	0	0	0
1883	PFR_JS13-1_1838	Hypothetical protein	2086322	2087086	-	PROKKA_01878	hypothetical protein	2086322	2087086	-					1	0	0	0	0	0	0
1884	PFR_JS13-1_1839	Hypothetical protein	2087145	2087837	-	PROKKA_01879	hypothetical protein	2087145	2087837	-					1	0	0	0	0	0	0
1885	PFR_JS13-1_1840	Protein of hypothetical function DUF894	2088137	2089888	+	PROKKA_01880	enterobactin exporter EntS	2088137	2089888	+			protein motif:CLUSTERS:PRK10489		1	0	0	0	0	0	0
1886	PFR_JS13-1_1841	Tat pathway signal sequence	2090086	2091624	-	PROKKA_01881	Arginine/agmatine antiporter	2090086	2091624	-		adiC	similar to AA sequence:UniProtKB:P60066		1	0	0	0	0	0	0
1887	PFR_JS13-1_1842	Fructokinase	2091807	2092772	+	PROKKA_01882	5-dehydro-2-deoxygluconokinase	2091807	2092772	+	2.7.1.92	iolC_2	similar to AA sequence:UniProtKB:P42414		1	0	0	0	0	0	0
1888	PFR_JS13-1_1843	Hypothetical protein	2092926	2093324	+	PROKKA_01883	hypothetical protein	2092926	2093324	+					1	0	0	0	0	0	0
1889	PFR_JS13-1_1844	Integral membrane lysyl-tRNA synthetase	2093321	2095396	-	PROKKA_01884	Lysylphosphatidylglycerol biosynthesis bifunctional protein LysX	2093321	2095396	-		lysX_1	similar to AA sequence:UniProtKB:P94974		1	0	0	0	0	0	0
1890	PFR_JS13-1_1845	Integral membrane protein MviN	2095460	2097403	-	PROKKA_01885	putative peptidoglycan biosynthesis protein MviN	2095460	2097403	-		mviN	similar to AA sequence:UniProtKB:O05435		1	0	0	0	0	0	0
1891	PFR_JS13-1_1846	Aspartate kinase	2097490	2098764	-	PROKKA_01886	Aspartokinase	2097490	2098764	-	2.7.2.4	ask	similar to AA sequence:UniProtKB:P0A4Z8		1	0	0	0	0	0	0
1892	PFR_JS13-1_1847	Oxidoreductase, NAD-binding domain protein	2098933	2099919	+	PROKKA_01887	1,5-anhydro-D-fructose reductase	2098933	2099919	+	1.1.1.292	afr_2	similar to AA sequence:UniProtKB:Q2I8V6		1	0	0	0	0	0	0
1893	PFR_JS13-1_1848	Isoleucine--tRNA ligase (Precursor)	2100046	2103306	-	PROKKA_01888	Isoleucine--tRNA ligase	2100046	2103306	-	6.1.1.5	ileS	similar to AA sequence:UniProtKB:P56690		1	0	0	0	0	0	0
1894	PFR_JS13-1_1849	Hypothetical protein	2103627	2104394	+	PROKKA_01889	hypothetical protein	2103627	2104394	+					0	0	0	0	0	0	0
1895	PFR_JS13-1_1850	Recombination protein RecR	2104418	2105044	-	PROKKA_01890	Recombination protein RecR	2104418	2105044	-		recR	similar to AA sequence:UniProtKB:Q8RDI4		1	0	0	0	0	0	0
1896	PFR_JS13-1_1851	Hypothetical protein	2105046	2105354	-	PROKKA_01891	Nucleoid-associated protein	2105046	2105354	-			similar to AA sequence:UniProtKB:A3DHB8		1	0	0	0	0	0	0
1897	PFR_JS13-1_1852	Hypothetical protein	2105605	2109009	-	PROKKA_01892	DNA polymerase III subunit tau	2105605	2109009	-	2.7.7.7	dnaX_2	similar to AA sequence:UniProtKB:P06710		0	0	0	0	0	0	0
1898	PFR_JS13-1_1853	Peptidase C60, sortase A and B	2109079	2109795	-	PROKKA_01893	Sortase family protein	2109079	2109795	-			protein motif:Pfam:PF04203.7		0	0	0	0	0	0	0
1899	PFR_JS13-1_1854	Putative cell wall anchor domain protein	2109891	2111270	-	PROKKA_01894	Cna protein B-type domain protein	2109891	2111270	-			protein motif:Pfam:PF05738.7		1	0	0	0	0	0	0
1900	PFR_JS13-1_1855	Copper-containing nitrite reductase (Major outer	2111424	2114060	-	PROKKA_01895	Copper-containing nitrite reductase precursor	2111424	2114060	-	1.7.2.1	aniA_1	similar to AA sequence:UniProtKB:Q02219		1	0	0	0	0	0	0
1901	PFR_JS13-1_1856	Hypothetical protein	2114057	2115379	-	PROKKA_01896	hypothetical protein	2114057	2115379	-					1	0	0	0	0	0	0
1902	PFR_JS13-1_1857	Transcriptional regulator	2115427	2116437	-	PROKKA_01897	hypothetical protein	2115427	2116437	-					0	0	0	0	0	0	0
1903	PFR_JS13-1_1858	Hemerythrin HHE cation binding region	2116443	2116730	-	PROKKA_01898	hypothetical protein	2116443	2116730	-					1	0	0	0	0	0	0
1904	PFR_JS13-1_1859	Threonine dehydratase ilvA	2117203	2118477	-	PROKKA_01899	L-threonine dehydratase biosynthetic IlvA	2117203	2118477	-	4.3.1.19	ilvA	similar to AA sequence:UniProtKB:P04968		1	0	0	0	0	0	0
1905						PROKKA_01900	tRNA-Ser(gga)	2118575	2118662	+			COORDINATES:profile:Aragorn:1.2		0					0	0
1906	PFR_JS13-1_1860	Hypothetical protein	2118834	2119340	+	PROKKA_01901	hypothetical protein	2118834	2119340	+					1	0	0	0	0	0	0
1907	PFR_JS13-1_1861	Hypothetical protein	2119375	2119890	-	PROKKA_01902	hypothetical protein	2119375	2119890	-					1	0	0	0	0	0	0
1908	PFR_JS13-1_1862	Carbamoylphosphate synthase large subunit	2120061	2121287	-	PROKKA_01903	hypothetical protein	2120061	2121287	-			protein motif:CLUSTERS:PRK06849		0	0	0	0	0	0	0
1909	PFR_JS13-1_1863	Alcohol dehydrogenase	2121344	2122357	-	PROKKA_01904	Zinc-type alcohol dehydrogenase-like protein	2121344	2122357	-			similar to AA sequence:UniProtKB:P99173		0	0	0	0	0	0	0
1910	PFR_JS13-1_1864	Hypothetical protein	2122472	2122714	-	PROKKA_01905	hypothetical protein	2122472	2122714	-					1	0	0	0	0	0	0
1911	PFR_JS13-1_1865	PF07510 family protein	2122804	2123553	-	PROKKA_01906	hypothetical protein	2122804	2123553	-					1	0	0	0	0	0	0
1912	PFR_JS13-1_1866	Type III restriction protein res subunit	2123594	2126815	+	PROKKA_01907	ATP-dependent RNA helicase SrmB	2123594	2126815	+	3.6.4.13	srmB	similar to AA sequence:UniProtKB:P21507		0	0	0	0	0	0	0	PfrJS13ORF1866P
1913	PFR_JS13-1_1867	Hypothetical protein	2126816	2127115	-	PROKKA_01908	hypothetical protein	2126816	2127115	-					0	0	0	0	0	0	0
1914	PFR_JS13-1_1868	Hypothetical protein	2127296	2127496	-	PROKKA_01909	hypothetical protein	2127296	2127496	-					0	0	0	0	0	0	0
1915	PFR_JS13-1_1869	Hypothetical protein	2127483	2127902	-	PROKKA_01910	hypothetical protein	2127483	2127902	-					0	0	0	0	0	0	0
1916	PFR_JS13-1_1870	Hypothetical protein	2128295	2128471	+	PROKKA_01911	hypothetical protein	2128295	2128471	+					0	0	0	0	0	0	0
1917	PFR_JS13-1_1871	Hypothetical protein	2128704	2129018	+	PROKKA_01912	hypothetical protein	2128704	2129018	+					0	0	0	0	0	0	0
1918	PFR_JS13-1_1872	Hypothetical protein	2129248	2129421	+	PROKKA_01913	hypothetical protein	2129248	2129421	+					0	0	0	0	0	0	0
1919	PFR_JS13-1_1873	Hypothetical protein	2129462	2130394	-	PROKKA_01914	hypothetical protein	2129462	2130394	-					0	0	0	0	0	0	0
1920	PFR_JS13-1_1874	SPFH domain/band 7 family protein	2130778	2131761	+	PROKKA_01915	FtsH protease regulator HflK	2130778	2131761	+			protein motif:CLUSTERS:PRK10930		0	0	0	0	0	0	0
1921	PFR_JS13-1_1875	Hypothetical protein	2131987	2132541	-	PROKKA_01916	hypothetical protein	2131987	2132541	-					1	0	0	0	0	0	0
1922	PFR_JS13-1_1876	Putative zinc transporter ZitB	2133022	2133972	-	PROKKA_01917	Cadmium, cobalt and zinc/H(+)-K(+) antiporter	2133022	2133972	-		czcD_2	similar to AA sequence:UniProtKB:O07084		1	0	0	0	0	0	0
1923	PFR_JS13-1_1877	Amino acid permease	2134089	2135483	-	PROKKA_01918	Aromatic amino acid transport protein AroP	2134089	2135483	-		aroP_1	similar to AA sequence:UniProtKB:P15993		1	0	0	0	0	0	0
1924	PFR_JS13-1_1878	Hydroxyethylthiazole kinase	2135911	2136771	+	PROKKA_01919	Hydroxyethylthiazole kinase	2135911	2136771	+	2.7.1.50	thiM	similar to AA sequence:UniProtKB:P39593		0	0	0	0	0	0	0
1925	PFR_JS13-1_1879	Thiamine-phosphate pyrophosphorylase (Precursor)	2136804	2137619	+	PROKKA_01920	Thiamine-phosphate synthase	2136804	2137619	+	2.5.1.3	thiE_2	similar to AA sequence:UniProtKB:P66919		0	0	0	0	0	0	0
1926	PFR_JS13-1_1880	Phosphomethylpyrimidine kinase	2137616	2138482	+	PROKKA_01921	Hydroxymethylpyrimidine/phosphomethylpyrimidine kinase	2137616	2138482	+	2.7.1.49	thiD	similar to AA sequence:UniProtKB:P55882		1	0	0	0	0	0	0
1927						PROKKA_01922	tRNA-His(gtg)	2139727	2139794	+			COORDINATES:profile:Aragorn:1.2		0					0	0
1928	PFR_JS13-1_1881	Putative hydroxymethylpyrimidine transporter	2138561	2139877	+											0	0	0	0	0	0
1929	PFR_JS13-1_1882	Putative unusual protein kinase	2139990	2141687	-	PROKKA_01923	putative protein kinase UbiB	2139990	2141687	-	2.7.-.-	ubiB_1	similar to AA sequence:UniProtKB:P0A6A0		1	0	0	0	0	0	0
1930	PFR_JS13-1_1883	Transcriptional regulator	2141730	2142302	-	PROKKA_01924	Transcriptional regulator YqjI	2141730	2142302	-		yqjI_2	similar to AA sequence:UniProtKB:P64588		1	0	0	0	0	0	0
1931	PFR_JS13-1_1884	Hypothetical protein	2142717	2143259	+	PROKKA_01925	hypothetical protein	2142717	2143259	+					0	0	0	0	0	0	0
1932	PFR_JS13-1_1885	Hypothetical protein	2143332	2144948	+	PROKKA_01926	Cellulosome-anchoring protein precursor	2143332	2144948	+		ancA	similar to AA sequence:UniProtKB:Q06848		0	0	0	0	0	0	0
1933	PFR_JS13-1_1886	ABC D-methionine transporter, permease component	2145072	2145728	-	PROKKA_01927	Methionine import system permease protein MetP	2145072	2145728	-		metP	similar to AA sequence:UniProtKB:O32168		1	0	0	0	0	0	0
1934	PFR_JS13-1_1887	Methionine import ATP-binding protein MetN 2	2145725	2146990	-	PROKKA_01928	Methionine import ATP-binding protein MetN	2145725	2146990	-	3.6.3.-	metN	similar to AA sequence:UniProtKB:O32169		1	0	0	0	0	0	0
1935	PFR_JS13-1_1888	NLPA lipoprotein	2146987	2147952	-	PROKKA_01929	Membrane lipoprotein TpN32 precursor	2146987	2147952	-			similar to AA sequence:UniProtKB:O07950		1	0	0	0	0	0	0
1936	PFR_JS13-1_1889	DNA-binding response regulator TrcR	2148503	2149231	+	PROKKA_01930	putative transcriptional regulatory protein TcrX	2148503	2149231	+		tcrX	similar to AA sequence:UniProtKB:O69730		1	0	0	0	0	0	0
1937	PFR_JS13-1_1890	Two-component sensor kinase TcrY	2149212	2151077	+	PROKKA_01931	putative sensor histidine kinase TcrY	2149212	2151077	+	2.7.13.3	tcrY	similar to AA sequence:UniProtKB:O69729		1	0	0	0	0	0	0
1938	PFR_JS13-1_1891	PfkB family sugar kinase	2151342	2152334	-	PROKKA_01932	Ribokinase	2151342	2152334	-	2.7.1.15	rbsK_1	similar to AA sequence:UniProtKB:P0A9J6		1	0	0	0	0	0	0
1939	PFR_JS13-1_1892	Hypothetical protein	2152570	2155293	-	PROKKA_01933	FHA domain protein	2152570	2155293	-			protein motif:Pfam:PF00498.20		0	0	0	0	0	0	0
1940	PFR_JS13-1_1893	Pyruvate, phosphate dikinase	2155756	2158413	-	PROKKA_01934	Pyruvate, phosphate dikinase	2155756	2158413	-	2.7.9.1	ppdK	similar to AA sequence:UniProtKB:P22983		1	0	0	0	0	0	0
1941	PFR_JS13-1_1894	Protein of hypothetical function DUF299	2158622	2159515	-	PROKKA_01935	Putative pyruvate, phosphate dikinase regulatory protein	2158622	2159515	-	2.7.11.32	yqfL	similar to AA sequence:UniProtKB:P54470		1	0	0	0	0	0	0
1942	PFR_JS13-1_1895	Restriction system protein mrr	2160027	2160968	+	PROKKA_01936	Mrr restriction system protein	2160027	2160968	+		mrr	similar to AA sequence:UniProtKB:P24202		0	0	0	0	0	0	0	PfrJS13MrrP
1943	PFR_JS13-1_1896	MATE efflux family protein	2161195	2162559	-	PROKKA_01937	DNA-damage-inducible protein F	2161195	2162559	-		dinF	similar to AA sequence:UniProtKB:P28303		1	0	0	0	0	0	0
1944	PFR_JS13-1_1897	Methyltransferase small domain protein	2162610	2163599	+	PROKKA_01938	Ribosomal RNA large subunit methyltransferase G	2162610	2163599	+	2.1.1.174	rlmG	similar to AA sequence:UniProtKB:P42596		0	0	0	0	0	0	0
1945	PFR_JS13-1_1898	Hypothetical protein	2163806	2164579	+	PROKKA_01939	hypothetical protein	2163806	2164579	+					0	0	0	0	0	0	0
1946	PFR_JS13-1_1899	2,5-diketo-D-gluconic acid reductase	2164756	2165589	+	PROKKA_01940	putative oxidoreductase/MSMEI_2347	2164756	2165589	+	1.-.-.-		similar to AA sequence:UniProtKB:A0QV10		1	0	0	0	0	0	0
1947	PFR_JS13-1_1900	Hypothetical protein	2165718	2166326	+	PROKKA_01941	hypothetical protein	2165718	2166326	+					0	0	0	0	0	0	0
1948	PFR_JS13-1_1901	Isochorismatase hydrolase	2166394	2167056	+	PROKKA_01942	Isochorismatase family protein	2166394	2167056	+			protein motif:Pfam:PF00857.14		1	0	0	0	0	0	0
1949	PFR_JS13-1_1902	Hypothetical protein	2167194	2168534	-	PROKKA_01943	hypothetical protein	2167194	2168534	-					1	0	0	0	0	0	0
1950	PFR_JS13-1_1903	Uncharacterized conserved protein UCP033563	2168847	2170037	+	PROKKA_01944	hypothetical protein	2168847	2170037	+					1	0	0	0	0	0	0
1951	PFR_JS13-1_1904	Succinate CoA transferase	2170161	2171684	+	PROKKA_01945	Succinyl-CoA:coenzyme A transferase	2170161	2171684	+	2.8.3.-	cat1	similar to AA sequence:UniProtKB:P38946		1	0	0	0	0	0	0
1952	PFR_JS13-1_1905	2-deoxy-D-gluconate 3-dehydrogenase KduD	2171912	2172724	-	PROKKA_01946	2-dehydro-3-deoxy-D-gluconate 5-dehydrogenase	2171912	2172724	-	1.1.1.127	kduD	similar to AA sequence:UniProtKB:Q05528		0	0	0	0	0	0	0
1953	PFR_JS13-1_1906	D-isomer specific 2-hydroxyacid dehydrogenase	2172764	2173813	-	PROKKA_01947	D-2-hydroxyisocaproate dehydrogenase	2172764	2173813	-	1.1.1.-		similar to AA sequence:UniProtKB:P17584		0	0	0	0	0	0	0
1954	PFR_JS13-1_1907	Pyrophosphatase PpaX	2173892	2174545	-	PROKKA_01948	Pyrophosphatase PpaX	2173892	2174545	-	3.6.1.1	ppaX	similar to AA sequence:UniProtKB:Q9JMQ2		1	0	0	0	0	0	0
1955	PFR_JS13-1_1908	Hypothetical protein	2174878	2176596	+	PROKKA_01949	hypothetical protein	2174878	2176596	+					0	0	0	0	0	0	0
1956	PFR_JS13-1_1909	Hypothetical protein	2176781	2177473	+	PROKKA_01950	hypothetical protein	2176781	2177473	+					1	0	0	0	0	0	0
1957						PROKKA_01951	tRNA-Gly(ccc)	2177559	2177632	+			COORDINATES:profile:Aragorn:1.2		0					0	0
1958	PFR_JS13-1_1910	Starvation-induced DNA protecting protein	2178136	2178663	-	PROKKA_01952	DNA protection during starvation protein 2	2178136	2178663	-	1.16.-.-	dps2	similar to AA sequence:UniProtKB:Q9RZN1		1	0	0	0	0	0	0
1959	PFR_JS13-1_1911	CAAX amino terminal protease self-immunity	2178821	2179852	-	PROKKA_01953	CAAX amino terminal protease self- immunity	2178821	2179852	-			protein motif:Pfam:PF02517.10		0	0	0	0	0	0	0
1960	PFR_JS13-1_1912	Hypothetical protein	2180040	2180258	-	PROKKA_01954	CsbD-like protein	2180040	2180258	-			protein motif:Pfam:PF05532.6		0	0	0	0	0	0	0
1961	PFR_JS13-1_1913	Putative long chain fatty acid-CoA ligase VraA	2180428	2181486	+	PROKKA_01955	putative acyl--CoA ligase YhfT	2180428	2181486	+	6.2.1.-	yhfT	similar to AA sequence:UniProtKB:O07619		0	0	0	0	0	0	0
1962	PFR_JS13-1_1914	Acetyl-CoA C-acetyltransferase vraB	2181483	2182637	+	PROKKA_01956	Acetyl-CoA acetyltransferase	2181483	2182637	+	2.3.1.9	thlA	similar to AA sequence:UniProtKB:P45359		1	0	0	0	0	0	0
1963	PFR_JS13-1_1915	Sugar phosphate antiporter	2183016	2184464	+	PROKKA_01957	Hexose phosphate transport protein	2183016	2184464	+		uhpT	similar to AA sequence:UniProtKB:P0AGC0		0	0	0	0	0	0	0
1964	PFR_JS13-1_1916	YktC (Inositol monophosphatase SuhB)	2184457	2185308	+	PROKKA_01958	Inositol-1-monophosphatase ImpA	2184457	2185308	+	3.1.3.25	impA	similar to AA sequence:UniProtKB:A0QX86		1	0	0	0	0	0	0
1965	PFR_JS13-1_1917	Permease, cytosine/purine, uracil, thiamine,	2185486	2187006	+	PROKKA_01959	Permease for cytosine/purines, uracil, thiamine, allantoin	2185486	2187006	+			protein motif:Pfam:PF02133.9		1	0	0	0	0	0	0
1966	PFR_JS13-1_1918	Carbohydrate kinase, PfkB family	2187003	2188007	+	PROKKA_01960	Ribokinase	2187003	2188007	+	2.7.1.15	rbsK_2	similar to AA sequence:UniProtKB:P0A9J6		0	0	0	0	0	0	0
1967	PFR_JS13-1_1919	Modification methylase (Cytosine-specific	2188156	2189814	+	PROKKA_01961	Modification methylase HaeIII	2188156	2189814	+	2.1.1.37	haeIIIM	similar to AA sequence:UniProtKB:P20589		0	1	1	0	0	0	0	M.PfrJS13III
1968	PFR_JS13-1_1920	Hypothetical protein	2189811	2191922	+	PROKKA_01962	hypothetical protein	2189811	2191922	+					0	1	1	0	0	0	0
1969	PFR_JS13-1_1921	Hypothetical protein	2191912	2193363	+	PROKKA_01963	hypothetical protein	2191912	2193363	+					0	1	1	0	0	0	0
1970	PFR_JS13-1_1922	Hypothetical protein	2193437	2199073	+	PROKKA_01964	AAA-like domain protein	2193437	2199073	+			protein motif:Pfam:PF12846.1		0	1	1	0	0	0	0
1971	PFR_JS13-1_1923	Putative DNA mismatch endonuclease	2199057	2199491	+	PROKKA_01965	Very short patch repair protein	2199057	2199491	+	3.1.-.-	vsr	similar to AA sequence:UniProtKB:P09184		0	1	1	0	0	0	0
1972	PFR_JS13-1_1924	NUDIX hydrolase	2199575	2200018	+	PROKKA_01966	CTP pyrophosphohydrolase	2199575	2200018	+	3.6.1.65	nudG	similar to AA sequence:UniProtKB:P77788		0	0	0	0	0	0	0
1973	PFR_JS13-1_1925	Hypothetical protein	2200111	2200314	+	PROKKA_01967	hypothetical protein	2200111	2200314	+					0	0	0	0	0	0	0
1974	PFR_JS13-1_1926	Sn-glycerol-3-phosphate transporter GlpT	2200604	2202022	-	PROKKA_01968	Glycerol-3-phosphate transporter	2200604	2202022	-		glpT	similar to AA sequence:UniProtKB:P08194		1	0	0	0	0	0	0
1975	PFR_JS13-1_1927	Mg2 transporter-C, MgtC family	2202312	2203040	-	PROKKA_01969	putative Mg(2+) transport ATPase	2202312	2203040	-			protein motif:CLUSTERS:PRK09977		1	0	0	0	0	0	0
1976	PFR_JS13-1_1928	Metallophosphoesterase	2203047	2204735	-	PROKKA_01970	hypothetical protein	2203047	2204735	-					1	0	0	0	0	0	0
1977	PFR_JS13-1_1929	Putative metabolite transport protein YaaU	2204728	2206116	-	PROKKA_01971	Inner membrane metabolite transport protein YgcS	2204728	2206116	-		ygcS	similar to AA sequence:UniProtKB:Q46909		1	0	0	0	0	0	0
1978	PFR_JS13-1_1930	Hypothetical protein	2206275	2206637	+	PROKKA_01972	hypothetical protein	2206275	2206637	+					0	0	0	0	0	0	0
1979	PFR_JS13-1_1931	Thermostable beta-glucosidase B	2206518	2208917	-	PROKKA_01973	Thermostable beta-glucosidase B	2206518	2208917	-	3.2.1.21	bglB	similar to AA sequence:UniProtKB:P14002		1	0	0	0	0	0	0
1980	PFR_JS13-1_1932	Transcriptional regulator TetR	2209287	2209979	+	PROKKA_01974	HTH-type transcriptional repressor KstR2	2209287	2209979	+		kstR2_2	similar to AA sequence:UniProtKB:A0R4Z6		0	0	0	0	0	0	0
1981	PFR_JS13-1_1933	Putative UDP-GlcNAc C4 epimerase	2210054	2211028	-	PROKKA_01975	UDP-glucose 4-epimerase	2210054	2211028	-	5.1.3.2	galE_2	similar to AA sequence:UniProtKB:Q7WTB1		1	0	0	0	0	0	0
1982	PFR_JS13-1_1934	Putative Sodium:sulfate symportert	2211341	2212738	+	PROKKA_01976	Citrate carrier	2211341	2212738	+		citT	similar to AA sequence:UniProtKB:P0AE74		1	0	0	0	0	0	0
1983	PFR_JS13-1_1935	Polyphosphate glucokinase/transcriptional	2212832	2213635	+	PROKKA_01977	Polyphosphate glucokinase	2212832	2213635	+	2.7.1.63	ppgK	similar to AA sequence:UniProtKB:A5U654		1	0	0	0	0	0	0
1984	PFR_JS13-1_1936	ABC-type Fe3-siderophores transport systems,	2213814	2214809	-	PROKKA_01978	putative siderophore-binding lipoprotein YfiY precursor	2213814	2214809	-		yfiY	similar to AA sequence:UniProtKB:O31567		1	0	0	0	0	0	0
1985	PFR_JS13-1_1937	Ferric enterobactin transport system permease	2215057	2216115	+	PROKKA_01979	Ferric enterobactin transport system permease protein FepD	2215057	2216115	+		fepD	similar to AA sequence:UniProtKB:P23876		1	0	0	0	0	0	0
1986	PFR_JS13-1_1938	Ferric enterobactin transport system permease	2216112	2217194	+	PROKKA_01980	Ferric enterobactin transport system permease protein FepG	2216112	2217194	+		fepG	similar to AA sequence:UniProtKB:P23877		1	0	0	0	0	0	0
1987	PFR_JS13-1_1939	Iron-siderophore uptake system ATP-binding	2217191	2218081	+	PROKKA_01981	putative siderophore transport system ATP-binding protein YusV	2217191	2218081	+		yusV_1	similar to AA sequence:UniProtKB:O32188		1	0	0	0	0	0	0
1988	PFR_JS13-1_1940	Arginine--tRNA ligase 1 (Precursor)	2218259	2219851	-	PROKKA_01982	Arginine--tRNA ligase	2218259	2219851	-	6.1.1.19	argS	similar to AA sequence:UniProtKB:P11875		1	0	0	0	0	0	0
1989	PFR_JS13-1_1941	UDP-glucose 6-dehydrogenase udgA	2219892	2221418	+	PROKKA_01983	UDP-glucose 6-dehydrogenase TuaD	2219892	2221418	+	1.1.1.22	tuaD	similar to AA sequence:UniProtKB:O32271		1	0	0	0	0	0	0
1990	PFR_JS13-1_1942	SanA protein	2221506	2222228	-	PROKKA_01984	vancomycin high temperature exclusion protein	2221506	2222228	-			protein motif:CLUSTERS:PRK10834		1	0	0	0	0	0	0
1991	PFR_JS13-1_1943	Conserved alanine and arginine rich protein	2222430	2224202	-	PROKKA_01985	Type III restriction enzyme, res subunit	2222430	2224202	-			protein motif:Pfam:PF04851.9		1	0	0	0	0	0	0
1992	PFR_JS13-1_1944	Ferredoxin-like protein fixX	2226232	2226525	-	PROKKA_01986	hypothetical protein	2226232	2226525	-					1	0	0	0	0	0	0
1993	PFR_JS13-1_1945	FAD dependent oxidoreductase	2226539	2227843	-	PROKKA_01987	Electron transfer flavoprotein-ubiquinone oxidoreductase	2226539	2227843	-	1.5.5.1		similar to AA sequence:UniProtKB:Q9HZP5		1	0	0	0	0	0	0
1994	PFR_JS13-1_1946	Electron transfer flavoprotein FAD-binding domain	2227846	2228718	-	PROKKA_01988	Electron transfer flavoprotein subunit alpha	2227846	2228718	-		etfA	similar to AA sequence:UniProtKB:P38974		1	0	0	0	0	0	0
1995	PFR_JS13-1_1947	Uma4 protein	2228761	2230068	-	PROKKA_01989	Transposase	2228761	2230068	-			protein motif:Pfam:PF01610.11		0	0	0	0	0	0	0
1996	PFR_JS13-1_1948	Electron transfer flavoprotein	2230198	2230941	-	PROKKA_01990	Electron transfer flavoprotein subunit beta	2230198	2230941	-		etfB	similar to AA sequence:UniProtKB:P38975		1	1	0	1	0	0	0
1997	PFR_JS13-1_1949	Transposase of ISAar20, ISL3 family	2231111	2232403	-	PROKKA_01991	Transposase	2231111	2232403	-			protein motif:Pfam:PF01610.11		0	2	1	1	0	0	0
1998	PFR_JS13-1_1950	Hypothetical protein	2232666	2233034	-	PROKKA_01992	hypothetical protein	2232666	2233034	-					0	2	1	1	0	0	0
1999	PFR_JS13-1_1951	YbfG	2233136	2235277	-	PROKKA_01993	Putative peptidoglycan binding domain protein	2233136	2235277	-			protein motif:Pfam:PF01471.12		0	2	1	1	0	0	0
[truncated: 256 more rows]
