# Supplementary material for: De novo assembly of genomes from long sequence reads reveals uncharted territories of Propionibacterium freudenreichii
Source: BMC Genomics. 2017 Oct 16;18:790. doi: 10.1186/s12864-017-4165-9 (PMC5644110; doi:10.1186/s12864-017-4165-9)
Supplement: Supplementary file 13 — Annotation file of the strain JS15 (DSM 4049) with the cumulative results of bioinformatics analyses. (XLSX 323 kb) [file 12864_2017_4165_MOESM13_ESM.xlsx]

## Sheet: LT618787
No.	Prodigal ID	product name	gene start	gene stop	strand	PROKKA ID	product name	gene start	gene stop	strand	eC_number	gene_name	database similar protein	note	Core	Island Viewer Predicted by at least one method	IV SIGI	IV Island Path	IV Island Pick	Prophinder	Phaster	Rebase	CRISPR	Special features
1	PFR_JS15-1_1	Chromosomal replication initiator protein DnaA	1	1467	+	PROKKA_00001	Chromosomal replication initiator protein DnaA	61	1467	+		dnaA	similar to AA sequence:UniProtKB:Q9ZH75		1	0	0	0	0	0	0
2	PFR_JS15-1_2	Drug resistance transporter, EmrB/QacA subfamily	1442	2911	-	PROKKA_00002	Multidrug export protein EmrB	1442	2911	-		emrB_1	similar to AA sequence:UniProtKB:P0AEJ0	Putative antibiotic resistance	1	0	0	0	0	0	0
3	PFR_JS15-1_3	Transcriptional regulator, MerR family	3153	3770	+	PROKKA_00003	hypothetical protein	3153	3770	+					1	0	0	0	0	0	0
4	PFR_JS15-1_4	SqdX	3767	4948	-	PROKKA_00004	GDP-mannose-dependent alpha-mannosyltransferase	3767	4948	-	2.4.1.-	mgtA_1	similar to AA sequence:UniProtKB:Q8NT41		1	0	0	0	0	0	0
5	PFR_JS15-1_5	Sulfolipid (UDP-sulfoquinovose) biosynthesis	4962	6209	-	PROKKA_00005	NAD dependent epimerase/dehydratase family protein	4962	6209	-			protein motif:Pfam:PF01370.15		1	0	0	0	0	0	0
6	PFR_JS15-1_6	ABC transport system ATP-binding protein	6681	7625	+	PROKKA_00006	ABC transporter ATP-binding protein YxdL	6681	7625	+		yxdL	similar to AA sequence:UniProtKB:P42423		0	0	0	0	0	0	0
7	PFR_JS15-1_7	ABC lipoprotein transporter, permease component	7627	10185	+	PROKKA_00007	ABC transporter permease YtrF precursor	7627	10185	+		ytrF_1	similar to AA sequence:UniProtKB:O35005		0	0	0	0	0	0	0
8	PFR_JS15-1_8	Hypothetical protein	11157	11933	-	PROKKA_00008	hypothetical protein	11157	11933	-					0	0	0	0	0	0	0
9	PFR_JS15-1_9	DNA polymerase III, beta subunit	12061	13221	+	PROKKA_00009	DNA polymerase III subunit beta	12061	13221	+	2.7.7.7	dnaN	similar to AA sequence:UniProtKB:Q50790		1	0	0	0	0	0	0
10	PFR_JS15-1_10	DNA replication and repair protein RecF	13295	14596	+	PROKKA_00010	DNA replication and repair protein RecF	13295	14596	+		recF	similar to AA sequence:UniProtKB:Q9RVE0		1	0	0	0	0	0	0
11	PFR_JS15-1_11	Hypothetical protein	14625	15371	+	PROKKA_00011	hypothetical protein	14625	15371	+			protein motif:CLUSTERS:PRK03195		1	0	0	0	0	0	0
12	PFR_JS15-1_12	Hypothetical protein	15624	17291	+	PROKKA_00012	Endo-1,4-beta-xylanase A precursor	15624	17291	+	3.2.1.8	xynA1_1	similar to AA sequence:UniProtKB:C6CRV0		0	0	0	0	0	0	0
13	PFR_JS15-1_13	Hypothetical protein	17573	18094	+	PROKKA_00013	hypothetical protein	17573	18094	+					0	0	0	0	0	0	0
14	PFR_JS15-1_14	Uma4 protein	18176	19483	+	PROKKA_00014	Transposase	18176	19483	+			protein motif:Pfam:PF01610.11		0	0	0	0	0	0	0
15	PFR_JS15-1_15	Hypothetical protein	19506	19982	+	PROKKA_00015	hypothetical protein	19506	19982	+					0	0	0	0	0	0	0
16	PFR_JS15-1_16	DNA gyrase, B subunit	20403	22445	+	PROKKA_00016	DNA gyrase subunit B	20403	22445	+	5.99.1.3	gyrB	similar to AA sequence:UniProtKB:P0C5C5		1	0	0	0	0	0	0
17	PFR_JS15-1_17	DNA gyrase, A subunit	22492	25227	+	PROKKA_00017	DNA gyrase subunit A	22492	25227	+	5.99.1.3	gyrA_1	similar to AA sequence:UniProtKB:Q07702		1	0	0	0	0	0	0
18	PFR_JS15-1_18	Hypothetical protein	25551	26333	+	PROKKA_00018	hypothetical protein	25551	26333	+					1	0	0	0	0	0	0
19	PFR_JS15-1_19	PF07561 domain protein	26464	26739	-	PROKKA_00019	hypothetical protein	26464	26739	-					1	0	0	0	0	0	0
20	PFR_JS15-1_20	UPF0103 protein	26980	27777	+	PROKKA_00020	hypothetical protein	26980	27777	+			protein motif:CLUSTERS:PRK00782		1	0	0	0	0	0	0
21	PFR_JS15-1_21	AMMECR1 domain protein	27842	28414	+	PROKKA_00021	hypothetical protein	27842	28414	+			protein motif:CLUSTERS:PRK00801		1	0	0	0	0	0	0
22	PFR_JS15-1_22	Pyruvate formate lyase activating protein pflA	28411	29499	+	PROKKA_00022	4-hydroxyphenylacetate decarboxylase activating enzyme	28411	29499	+	1.97.1.-	csdA	similar to AA sequence:UniProtKB:Q38HX2		1	0	0	0	0	0	0
23	PFR_JS15-1_23	Integral membrane protein	29656	30174	+	PROKKA_00023	hypothetical protein	29656	30174	+					1	0	0	0	0	0	0
24						PROKKA_00024	tRNA-Ile(gat)	30248	30323	+			COORDINATES:profile:Aragorn:1.2		0					0	0
25	PFR_JS15-1_24	Hypothetical protein	30412	30858	+	PROKKA_00025	hypothetical protein	30412	30858	+					1	0	0	0	0	0	0
26	PFR_JS15-1_25	Hypothetical protein	30873	31331	+	PROKKA_00026	hypothetical protein	30873	31331	+					1	0	0	0	0	0	0
27	PFR_JS15-1_26	Hypothetical protein	31368	31778	-	PROKKA_00027	hypothetical protein	31368	31778	-					1	0	0	0	0	0	0
28	PFR_JS15-1_27	Transcriptional regulator	32051	32833	+	PROKKA_00028	Catabolite control protein A	32051	32833	+		ccpA_1	similar to AA sequence:UniProtKB:P46828		1	0	0	0	0	0	0
29	PFR_JS15-1_28	Hypothetical protein	32968	33126	+	PROKKA_00029	hypothetical protein	32968	33126	+					0	0	0	0	0	0	0
30	PFR_JS15-1_29	Oxidoreductase, NAD-binding domain protein	33504	34694	+	PROKKA_00030	1,5-anhydro-D-fructose reductase	33504	34694	+	1.1.1.292	afr_1	similar to AA sequence:UniProtKB:Q2I8V6		0	0	0	0	0	0	0
31	PFR_JS15-1_30	MFS transporter, sugar porter family protein	34711	36363	+	PROKKA_00031	Major myo-inositol transporter IolT	34711	36363	+		iolT_1	similar to AA sequence:UniProtKB:O34718		0	0	0	0	0	0	0
32	PFR_JS15-1_31	Two-component system response regulator	36599	37258	-	PROKKA_00032	Oxygen regulatory protein NreC	36599	37258	-		nreC_1	similar to AA sequence:UniProtKB:Q7WZY4		1	0	0	0	0	0	0
33	PFR_JS15-1_32	Two-component system sensor kinase	37255	38757	-	PROKKA_00033	Sensor histidine kinase DesK	37255	38757	-	2.7.13.3	desK_1	similar to AA sequence:UniProtKB:O34757		1	0	0	0	0	0	0
34	PFR_JS15-1_33	Alpha-ketoglutarate transporter, MFS super	38959	40293	-	PROKKA_00034	Alpha-ketoglutarate permease	38959	40293	-		kgtP_1	similar to AA sequence:UniProtKB:P0AEX3		1	0	0	0	0	0	0
35	PFR_JS15-1_34	Peptidase M20D, amidohydrolase	40312	41523	-	PROKKA_00035	putative hydrolase YxeP	40312	41523	-	3.-.-.-	yxeP_1	similar to AA sequence:UniProtKB:P54955		1	0	0	0	0	0	0
36	PFR_JS15-1_35	ABC transporter	42060	43952	+	PROKKA_00036	Putative multidrug export ATP-binding/permease protein	42060	43952	+	3.6.3.-		similar to AA sequence:UniProtKB:Q99T13	Putative antibiotic resistance	1	0	0	0	0	0	0
37	PFR_JS15-1_36	ABC-type multidrug transport system ATPase and	43952	45919	+	PROKKA_00037	Putative multidrug export ATP-binding/permease protein	43952	45919	+	3.6.3.-		similar to AA sequence:UniProtKB:Q99T13	Putative antibiotic resistance	0	0	0	0	0	0	0
38	PFR_JS15-1_37	Alanine dehydrogenase	46134	47249	+	PROKKA_00038	Alanine dehydrogenase	46134	47249	+	1.4.1.1	ald	similar to AA sequence:UniProtKB:Q8KY18		1	0	0	0	0	0	0
39	PFR_JS15-1_38	Amino acid permease	47617	49155	+	PROKKA_00039	D-serine/D-alanine/glycine transporter	47617	49155	+		cycA_1	similar to AA sequence:UniProtKB:P0AAE0		1	0	0	0	0	0	0
40	PFR_JS15-1_39	Putative conserved lipoprotein lppS	49372	50571	-	PROKKA_00040	Putative L,D-transpeptidase LppS precursor	49372	50571	-	2.-.-.-	lppS	similar to AA sequence:UniProtKB:Q8NMT9		1	0	0	0	0	0	0
41	PFR_JS15-1_40	Hypothetical protein	50586	50726	+	PROKKA_00041	hypothetical protein	50586	50726	+					0	0	0	0	0	0	0
42	PFR_JS15-1_41	Hypothetical protein	50959	51246	+	PROKKA_00042	Acylphosphatase	50959	51246	+	3.6.1.7	acyP	similar to AA sequence:UniProtKB:O35031		0	0	0	0	0	0	0
43	PFR_JS15-1_42	YvyE protein	51279	51962	-	PROKKA_00043	IMPACT family member YigZ	51279	51962	-		yigZ	similar to AA sequence:UniProtKB:P27862		0	0	0	0	0	0	0
44	PFR_JS15-1_43	Nitroreductase	52093	52602	+	PROKKA_00044	malonic semialdehyde reductase	52093	52602	+			protein motif:CLUSTERS:PRK05365		0	0	0	0	0	0	0
45	PFR_JS15-1_44	Conserved transmembrane protein	52797	54488	+	PROKKA_00045	hypothetical protein	52797	54488	+					0	0	0	0	0	0	0
46	PFR_JS15-1_45	Hypothetical protein	54526	55104	-	PROKKA_00046	hypothetical protein	54526	55104	-					0	0	0	0	0	0	0
47	PFR_JS15-1_46	Hypothetical protein	55077	56093	-	PROKKA_00047	hypothetical protein	55077	56093	-					0	0	0	0	0	0	0
48	PFR_JS15-1_47	Conserved domain protein	56090	58183	-	PROKKA_00048	hypothetical protein	56090	58183	-					0	0	0	0	0	0	0
49	PFR_JS15-1_48	Glucose-1-phosphate thymidylyltransferase	58239	59108	-	PROKKA_00049	Glucose-1-phosphate thymidylyltransferase	58239	59108	-	2.7.7.24	rmlA	similar to AA sequence:UniProtKB:A0QPF9		0	0	0	0	0	0	0
50	PFR_JS15-1_49	Dolichyl-phosphate mannose synthase	59272	60018	+	PROKKA_00050	Undecaprenyl-phosphate mannosyltransferase	59272	60018	+	2.4.1.54		similar to AA sequence:UniProtKB:C5CBV8		0	0	0	0	0	0	0
51	PFR_JS15-1_50	Hypothetical protein	60015	60440	+	PROKKA_00051	hypothetical protein	60015	60440	+					0	0	0	0	0	0	0
52	PFR_JS15-1_51	TuaG-like glycosyl transferase	60579	61460	+	PROKKA_00052	Putative glycosyltransferase EpsE	60579	61460	+	2.4.-.-	epsE_1	similar to AA sequence:UniProtKB:P71054		0	0	0	0	0	0	0
53	PFR_JS15-1_52	Polysaccharide biosynthesis protein	61529	62773	-	PROKKA_00053	hypothetical protein	61529	62773	-					0	0	0	0	0	0	0
54	PFR_JS15-1_53	Rhamnosyltransferase , Glycosyl transferase	62942	64675	+	PROKKA_00054	UDP-Glc:alpha-D-GlcNAc-diphosphoundecaprenol beta-1,3-glucosyltransferase WfgD	62942	64675	+	2.4.1.305	wfgD	similar to AA sequence:UniProtKB:B5L3F2		0	0	0	0	0	0	0
55	PFR_JS15-1_54	Conserved transmembrane protein	64758	66290	-	PROKKA_00055	hypothetical protein	64758	66290	-					0	0	0	0	0	0	0
56	PFR_JS15-1_55	Fused dTDP-4-keto-L-rhamnose reductase and	66445	67905	-	PROKKA_00056	putative dTDP-4-dehydrorhamnose 3,5-epimerase	66445	67905	-	5.1.3.13	rfbC	similar to AA sequence:UniProtKB:Q5XCG7		0	0	0	0	0	0	0
57	PFR_JS15-1_56	DTDP-glucose 4,6-dehydratase RmlB	67910	68908	-	PROKKA_00057	dTDP-glucose 4,6-dehydratase	67910	68908	-	4.2.1.46	rmlB	similar to AA sequence:UniProtKB:P95780		0	0	0	0	0	0	0
58	PFR_JS15-1_57	Large surface protein A	69039	73073	-	PROKKA_00058	Exo-glucosaminidase LytG precursor	69039	73073	-	3.2.1.-	lytG	similar to AA sequence:UniProtKB:O32083		0	0	0	0	0	0	0
59	PFR_JS15-1_58	UDP-galactopyranose mutase glf	73366	74553	+	PROKKA_00059	UDP-galactopyranose mutase	73366	74553	+	5.4.99.9	glf	similar to AA sequence:UniProtKB:O06934		1	0	0	0	0	0	0
60	PFR_JS15-1_59	UDP-galactofuranosyl transferase GlfT2	74550	76562	+	PROKKA_00060	Galactofuranosyl transferase GlfT2	74550	76562	+	2.4.1.288	glfT2	similar to AA sequence:UniProtKB:O53585		0	0	0	0	0	0	0
61	PFR_JS15-1_60	Polysaccharide export ABC-2 type transport system	76567	77451	+	PROKKA_00061	Teichoic acid translocation permease protein TagG	76567	77451	+		tagG	similar to AA sequence:UniProtKB:P42953		0	0	0	0	0	0	0
62	PFR_JS15-1_61	O-antigen export system ATP-binding protein RfbB	77451	78221	+	PROKKA_00062	Teichoic acids export ATP-binding protein TagH	77451	78221	+	3.6.3.40	tagH	similar to AA sequence:UniProtKB:P42954		1	0	0	0	0	0	0
63	PFR_JS15-1_62	Hypothetical protein	78334	80742	-	PROKKA_00063	Putative glycosyltransferase EpsE	78334	80742	-	2.4.-.-	epsE_2	similar to AA sequence:UniProtKB:P71054		0	0	0	0	0	0	0
64	PFR_JS15-1_63	Amylovoran biosynthesis glycosyltransferase AmsE	80918	81775	-	PROKKA_00064	UDP-Gal:alpha-D-GlcNAc-diphosphoundecaprenol beta-1,3-galactosyltransferase	80918	81775	-	2.4.1.303	wbbD	similar to AA sequence:UniProtKB:Q03084		0	0	0	0	0	0	0
65	PFR_JS15-1_64	DTDP-rhamnosyl transferase RfbF	81772	82734	-	PROKKA_00065	Galactofuranosyl transferase GlfT1	81772	82734	-	2.4.1.287	glfT1	similar to AA sequence:UniProtKB:A0R5Z2		0	0	0	0	0	0	0
66	PFR_JS15-1_65	Thioredoxin	82958	83374	-	PROKKA_00066	Thioredoxin	82958	83374	-			protein motif:Pfam:PF00085.14		1	0	0	0	0	0	0
67	PFR_JS15-1_66	Integral membrane protein	83379	83888	-	PROKKA_00067	hypothetical protein	83379	83888	-					1	0	0	0	0	0	0
68	PFR_JS15-1_67	1-acyl-sn-glycerol-3-phosphate acyltransferase	85007	85804	-	PROKKA_00068	Bifunctional protein Aas	85007	85804	-		aas	similar to AA sequence:UniProtKB:P31119		1	0	0	0	0	0	0
69	PFR_JS15-1_68	Oxidoreductase, short chain	85804	86700	-	PROKKA_00069	Gluconate 5-dehydrogenase	85804	86700	-	1.1.1.69	gno	similar to AA sequence:UniProtKB:P50199		1	0	0	0	0	0	0
70	PFR_JS15-1_69	Acetate kinase	86713	87903	-	PROKKA_00070	Acetate kinase	86713	87903	-	2.7.2.1	ackA	similar to AA sequence:UniProtKB:P77845		1	0	0	0	0	0	0
71	PFR_JS15-1_70	Phospho acetyltransferase	88064	89596	-	PROKKA_00071	Phosphate acetyltransferase	88064	89596	-	2.3.1.8	pta	similar to AA sequence:UniProtKB:Q8ZND6		1	0	0	0	0	0	0
72	PFR_JS15-1_71	DNA/RNA helicase, superfamily II, SNF2 family	89774	93172	-	PROKKA_00072	ATP-dependent helicase HepA	89774	93172	-			protein motif:CLUSTERS:PRK04914		1	0	0	0	0	0	0
73	PFR_JS15-1_72	Transposase of ISAar43, IS3 family, IS407 group,	93970	94254	+	PROKKA_00073	Transposase	93970	94254	+			protein motif:Pfam:PF01527.14		0	1	1	0	0	0	0
74	PFR_JS15-1_73	Insertion sequence IS407 OrfB	94305	95120	+	PROKKA_00074	Integrase core domain protein	94305	95120	+			protein motif:Pfam:PF00665.20		0	1	1	0	0	0	0
75	PFR_JS15-1_74	Hypothetical protein	95117	96205	+	PROKKA_00075	hypothetical protein	95117	96205	+					0	1	1	0	0	0	0
76	PFR_JS15-1_75	Hypothetical protein	96223	97167	-	PROKKA_00076	hypothetical protein	96223	97167	-					0	1	1	0	0	0	0
77	PFR_JS15-1_76	Uma4 protein	97498	98805	+	PROKKA_00077	Transposase	97498	98805	+			protein motif:Pfam:PF01610.11		0	1	1	0	0	0	0
78	PFR_JS15-1_77	Chondroitin sulfate/heparin utilization	98864	100027	+	PROKKA_00078	Anaerobic sulfatase-maturating enzyme	98864	100027	+	1.1.99.-	chuR	similar to AA sequence:UniProtKB:Q02550		0	0	0	0	0	0	0
79	PFR_JS15-1_78	Carbohydrate kinase FGGY	100456	102012	+	PROKKA_00079	Glycerol kinase	100456	102012	+	2.7.1.30	glpK_1	similar to AA sequence:UniProtKB:P0A6F3		1	0	0	0	0	0	0
80	PFR_JS15-1_79	NAD-dependent glycerol-3-phosphate dehydrogenase	102065	103117	+	PROKKA_00080	Glycerol-3-phosphate dehydrogenase [NAD(P)+]	102065	103117	+	1.1.1.94	gpsA	similar to AA sequence:UniProtKB:Q83BJ0		1	0	0	0	0	0	0
81	PFR_JS15-1_80	Transcriptional regulator	103191	103967	+	PROKKA_00081	Glucitol operon repressor	103191	103967	+		srlR	similar to AA sequence:UniProtKB:P15082		1	0	0	0	0	0	0
82	PFR_JS15-1_81	DNA glycosylase	104400	105398	+	PROKKA_00082	hypothetical protein	104400	105398	+					1	0	0	0	0	0	0
83	PFR_JS15-1_82	Membrane protein mosC	105398	106657	+	PROKKA_00083	Inner membrane protein YbjJ	105398	106657	+		ybjJ	similar to AA sequence:UniProtKB:P75810		1	0	0	0	0	0	0
84	PFR_JS15-1_83	ATPase/histidine kinase/DNA gyrase B/HSP90 domain	106686	108113	-	PROKKA_00084	Signal transduction histidine-protein kinase/phosphatase MprB	106686	108113	-	2.7.13.3	mprB	similar to AA sequence:UniProtKB:Q7U0X3		1	0	0	0	0	0	0
85	PFR_JS15-1_84	Response regulator MprA	108110	108805	-	PROKKA_00085	Response regulator MprA	108110	108805	-		mprA_1	similar to AA sequence:UniProtKB:A0R3I8		1	0	0	0	0	0	0
86	PFR_JS15-1_85	Cyanophycinase	108812	109726	-	PROKKA_00086	hypothetical protein	108812	109726	-					1	0	0	0	0	0	0
87	PFR_JS15-1_86	PtpA	109782	110246	-	PROKKA_00087	putative low molecular weight protein-tyrosine-phosphatase	109782	110246	-	3.1.3.48	ptpA_1	similar to AA sequence:UniProtKB:P65716		1	0	0	0	0	0	0
88	PFR_JS15-1_87	Membrane spanning protein	110243	110623	-	PROKKA_00088	Membrane protein of unknown function	110243	110623	-			protein motif:Pfam:PF04020.7		1	0	0	0	0	0	0
89	PFR_JS15-1_88	Ornithine carbamoyltransferase	110762	111766	+	PROKKA_00089	Ornithine carbamoyltransferase	110762	111766	+	2.1.3.3	argF	similar to AA sequence:UniProtKB:Q8DCF5		1	0	0	0	0	0	0
90	PFR_JS15-1_89	TDG/mug DNA glycosylase family protein	111770	112369	+	PROKKA_00090	G/U mismatch-specific DNA glycosylase	111770	112369	+	3.2.2.28	mug	similar to AA sequence:UniProtKB:P0A9H1		0	0	0	0	0	0	0
91	PFR_JS15-1_90	NADH oxidase	112653	113441	+	PROKKA_00091	NADH oxidase	112653	113441	+	1.-.-.-		similar to AA sequence:UniProtKB:P32382		0	1	0	1	0	0	0
92	PFR_JS15-1_91	Transposase of ISAar20, ISL3 family	113408	114763	+	PROKKA_00092	Transposase	113408	114763	+			protein motif:Pfam:PF01610.11		0	1	0	1	0	0	0
93	PFR_JS15-1_92	Hypothetical protein	114687	114941	-	PROKKA_00093	hypothetical protein	114687	114941	-					0	1	0	1	0	0	0
94	PFR_JS15-1_93	Ribonuclease BN	114988	116082	-	PROKKA_00094	ribonuclease BN/unknown domain fusion protein	114988	116082	-			protein motif:CLUSTERS:PRK04214		0	1	0	1	0	0	0
95	PFR_JS15-1_94	Hypothetical protein	116145	116708	-	PROKKA_00095	hypothetical protein	116145	116708	-					0	1	0	1	0	0	0
96	PFR_JS15-1_95	Hypothetical protein	116705	116863	-	PROKKA_00096	hypothetical protein	116705	116863	-					0	1	0	1	0	0	0
97	PFR_JS15-1_96	Hypothetical protein	116946	118001	+	PROKKA_00097	hypothetical protein	116946	118001	+					0	1	0	1	0	0	0
98	PFR_JS15-1_97	Hypothetical protein	118019	118312	-	PROKKA_00098	hypothetical protein	118019	118312	-					0	0	0	0	0	0	0
99	PFR_JS15-1_98	Hypothetical protein	118269	118691	-	PROKKA_00099	hypothetical protein	118269	118691	-			protein motif:Pfam:PF00370.15	FGGY family of carbohydrate kinases, N-terminal domain	0	0	0	0	0	0	0
100	PFR_JS15-1_99	SPFH/Band 7/PHB domain protein	118805	119569	-	PROKKA_00100	Modulator of FtsH protease HflC	118805	119569	-		hflC	similar to AA sequence:UniProtKB:P0ABC3		0	0	0	0	0	0	0
101	PFR_JS15-1_100	Putative transposase	119704	120573	-	PROKKA_00101	hypothetical protein	119704	120573	-					0	0	0	0	0	0	0
102	PFR_JS15-1_101	Putative nitric oxide reductase, NorZ	120578	122992	-	PROKKA_00102	Nitric oxide reductase subunit B	120578	122992	-	1.7.2.5	norB	similar to AA sequence:UniProtKB:P98008		0	0	0	0	0	0	0
103	PFR_JS15-1_102	Hypothetical protein	123722	123919	-	PROKKA_00103	hypothetical protein	123722	123919	-					0	0	0	0	0	0	1
104	PFR_JS15-1_103	Hypothetical protein	123968	124312	+	PROKKA_00104	Transposase	123968	124312	+			protein motif:Pfam:PF01527.14		0	0	0	0	0	0	1
105	PFR_JS15-1_104	Integrase, catalytic region	124309	125217	+	PROKKA_00105	Integrase core domain protein	124309	125217	+			protein motif:Pfam:PF00665.20		0	0	0	0	0	0	1
106	PFR_JS15-1_105	Hypothetical protein	125502	125864	-	PROKKA_00106	hypothetical protein	125502	125864	-					0	0	0	0	0	0	1
107	PFR_JS15-1_106	Transposase IS6110	125899	126786	-	PROKKA_00107	Integrase core domain protein	125899	126786	-			protein motif:Pfam:PF00665.20		0	0	0	0	0	0	1
108	PFR_JS15-1_107	IS3 family element	126819	127163	-	PROKKA_00108	Transposase	126819	127163	-			protein motif:Pfam:PF01527.14		0	0	0	0	0	0	1
109	PFR_JS15-1_108	Integrase, catalytic region	127202	128110	-	PROKKA_00109	Integrase core domain protein	127202	128110	-			protein motif:Pfam:PF00665.20		0	0	0	0	0	0	1
110	PFR_JS15-1_109	Hypothetical protein	128107	128490	-	PROKKA_00110	Transposase	128107	128490	-			protein motif:Pfam:PF01527.14		0	0	0	0	0	0	1
111	PFR_JS15-1_110	Hypothetical protein	128796	129602	-	PROKKA_00111	hypothetical protein	128796	129602	-					0	0	0	0	0	0	1
112	PFR_JS15-1_111	Gluconokinase	129780	131315	-	PROKKA_00112	Xylulose kinase	129780	131315	-	2.7.1.17	xylB	similar to AA sequence:UniProtKB:P35850		0	0	0	0	0	0	1
113	PFR_JS15-1_112	DNA-(Apurinic or apyrimidinic site) lyase	131574	132437	-	PROKKA_00113	putative formamidopyrimidine-DNA glycosylase-like protein	131574	132437	-		fpg2	similar to AA sequence:UniProtKB:L0T864		1	0	0	0	0	0	1
114	PFR_JS15-1_113	Leucyl/phenylalanyl-tRNA--protein transferase	132430	133155	-	PROKKA_00114	Leucyl/phenylalanyl-tRNA--protein transferase	132430	133155	-	2.3.2.6	aat	similar to AA sequence:UniProtKB:P0A8P1		1	0	0	0	0	0	1
115	PFR_JS15-1_114	Hypothetical protein	133702	135888	-	PROKKA_00115	Serine/threonine-protein kinase PrkC	133702	135888	-	2.7.11.1	prkC_1	similar to AA sequence:UniProtKB:O34507		0	0	0	0	0	0	0
116	PFR_JS15-1_115	Putative cell wall catabolism protein	136203	136811	-	PROKKA_00116	Resuscitation-promoting factor RpfA precursor	136203	136811	-	3.-.-.-	rpfA	similar to AA sequence:UniProtKB:O53879		0	0	0	0	0	0	0
117	PFR_JS15-1_116	Citrate (Si)-synthase	137023	138327	-	PROKKA_00117	Citrate synthase 1	137023	138327	-	2.3.3.1	gltA2_1	similar to AA sequence:UniProtKB:Q10530		1	0	0	0	0	0	0
118	PFR_JS15-1_117	EcsC family protein	138786	139589	+	PROKKA_00118	EcsC protein family protein	138786	139589	+			protein motif:Pfam:PF12787.1		1	0	0	0	0	0	0
119	PFR_JS15-1_118	Hypothetical protein	139700	140569	-	PROKKA_00119	hypothetical protein	139700	140569	-					0	0	0	0	0	0	0
120	PFR_JS15-1_119	Putative subtilisin BPN	140748	142364	-	PROKKA_00120	Subtilase family protein	140748	142364	-			protein motif:Pfam:PF00082.16		1	0	0	0	0	0	0
121	PFR_JS15-1_120	Alanine racemase	142374	143522	-	PROKKA_00121	Alanine racemase	142374	143522	-	5.1.1.1	alr	similar to AA sequence:UniProtKB:Q9S5V6		1	0	0	0	0	0	0
122	PFR_JS15-1_121	Hypothetical protein	143695	145248	-	PROKKA_00122	Coenzyme A biosynthesis bifunctional protein CoaBC	143695	145248	-		coaBC	similar to AA sequence:UniProtKB:P0ABQ0		1	0	0	0	0	0	0
123	PFR_JS15-1_122	MarR family protein	145292	145636	-	PROKKA_00123	HTH-type transcriptional regulator	145292	145636	-			similar to AA sequence:UniProtKB:O53478		0	0	0	0	0	0	0
124	PFR_JS15-1_123	Possible FMN oxidoreductase CC3083, imported	145639	146286	-	PROKKA_00124	NADH oxidase	145639	146286	-	1.-.-.-		similar to AA sequence:UniProtKB:P32382		0	0	0	0	0	0	0
125	PFR_JS15-1_124	Uma4 protein	146410	147717	+	PROKKA_00125	Transposase	146410	147717	+			protein motif:Pfam:PF01610.11		0	2	1	1	0	0	0
126	PFR_JS15-1_125	Hypothetical protein	147977	148312	+	PROKKA_00126	hypothetical protein	147977	148312	+					0	2	1	1	0	0	0
127	PFR_JS15-1_126	Restriction endonuclease PvuRts1 I	148331	149269	-	PROKKA_00127	hypothetical protein	148331	149269	-					0	2	1	1	0	0	0	PfrJS15ORF126P
128	PFR_JS15-1_127	Hypothetical protein	149939	150361	+	PROKKA_00128	Transposase	149939	150361	+			protein motif:Pfam:PF01610.11		0	2	1	1	0	0	0
129	PFR_JS15-1_128	IS3 family element	150413	150757	+	PROKKA_00129	Transposase	150413	150757	+			protein motif:Pfam:PF01527.14		0	2	1	1	0	0	0
130	PFR_JS15-1_129	Transposase IS6110	150790	151677	+	PROKKA_00130	Integrase core domain protein	150790	151677	+			protein motif:Pfam:PF00665.20		0	2	1	1	0	0	0
131	PFR_JS15-1_130	Appr-1-p processing, ADP-ribose-1-monophosphate	151767	152720	+	PROKKA_00131	O-acetyl-ADP-ribose deacetylase	151767	152720	+	3.5.1.-	ymdB_1	similar to AA sequence:UniProtKB:P0A8D6		0	2	1	1	0	0	0
132	PFR_JS15-1_131	DNA polymerase	152835	154403	-	PROKKA_00132	DNA polymerase III PolC-type	152835	154403	-	2.7.7.7	polC_1	similar to AA sequence:UniProtKB:Q9ZHF6		0	1	0	1	0	0	0
133	PFR_JS15-1_132	Type I site-specific deoxyribonuclease, HsdR	154477	157515	-	PROKKA_00133	Type I restriction enzyme EcoR124II R protein	154477	157515	-	3.1.21.3	hsdR	similar to AA sequence:UniProtKB:P10486		0	1	0	1	0	0	0	PfrJS15ORF135P
134	PFR_JS15-1_133	Hypothetical protein	157512	157829	-	PROKKA_00134	Putative type-1 restriction enzyme specificity protein MPN_089	157512	157829	-			similar to AA sequence:UniProtKB:P75604		0	0	0	0	0	0	0	S1.PfrJS15ORF135P
135	PFR_JS15-1_134	, type I restriction enzyme	158099	158377	-	PROKKA_00135	Putative type-1 restriction enzyme specificity protein MPN_089	158099	158377	-			similar to AA sequence:UniProtKB:P75604		0	0	0	0	0	0	0	S2.PfrJS15ORF135P
136	PFR_JS15-1_135	Type I restriction-modification system, M	158770	160338	-	PROKKA_00136	putative type I restriction enzymeP M protein	158770	160338	-	2.1.1.72		similar to AA sequence:UniProtKB:Q89Z59		0	0	0	0	0	0	0	M.PfrJS15ORF135P
137	PFR_JS15-1_136	Putative ABC-type Phosphonate and Molybdate	160393	162216	-	PROKKA_00137	putative ABC transporter ATP-binding protein YbhF	160393	162216	-		ybhF	similar to AA sequence:UniProtKB:P0A9U1		1	0	0	0	0	0	0
138	PFR_JS15-1_137	ABC transporter	162213	163412	-	PROKKA_00138	Inner membrane transport permease YbhR	162213	163412	-		ybhR	similar to AA sequence:UniProtKB:P0AFP9		0	0	0	0	0	0	0
139	PFR_JS15-1_138	Hypothetical protein	163501	163725	+	PROKKA_00139	hypothetical protein	163501	163725	+					0	0	0	0	0	0	0
140	PFR_JS15-1_139	Hypothetical protein	163614	164603	-	PROKKA_00140	putative 2-dehydropantoate 2-reductase	163614	164603	-	1.1.1.169	panE_1	similar to AA sequence:UniProtKB:O34661		1	0	0	0	0	0	0
141	PFR_JS15-1_140	Aminodeoxychorismate synthase, component I	164841	166574	+	PROKKA_00141	Aminodeoxychorismate synthase component 1	164841	166574	+	2.6.1.85	pabB	similar to AA sequence:UniProtKB:P05041		0	0	0	0	0	0	0
142	PFR_JS15-1_141	Branched-chain amino acid aminotransferase	166567	167520	+	PROKKA_00142	4-amino-4-deoxychorismate lyase	166567	167520	+			protein motif:CLUSTERS:PRK07849		0	0	0	0	0	0	0
143	PFR_JS15-1_142	Hypothetical protein	167813	168493	-	PROKKA_00143	hypothetical protein	167813	168493	-					0	0	0	0	0	0	0
144	PFR_JS15-1_143	Prephenate dehydratase	169104	170090	+	PROKKA_00144	Prephenate dehydratase	169104	170090	+	4.2.1.51	pheA	similar to AA sequence:UniProtKB:P96240		1	0	0	0	0	0	0
145	PFR_JS15-1_144	Diacylglycerol kinase	169970	171595	-	PROKKA_00145	Lipid kinase YegS	169970	171595	-	2.7.1.-	yegS	similar to AA sequence:UniProtKB:P76407		1	0	0	0	0	0	0
146	PFR_JS15-1_145	Seryl-tRNA synthetase SerS	171722	172996	+	PROKKA_00146	Serine--tRNA ligase	171722	172996	+	6.1.1.11	serS	similar to AA sequence:UniProtKB:Q8NLP6		1	0	0	0	0	0	0
147	PFR_JS15-1_146	Phosphoprotein 3 (GPP34)	173117	173797	+	PROKKA_00147	hypothetical protein	173117	173797	+					1	0	0	0	0	0	0
148	PFR_JS15-1_147	PTS system mannose-specific EIIBCA component	173937	176909	-	PROKKA_00148	PTS system beta-glucoside-specific EIIBCA component	173937	176909	-		bglF	similar to AA sequence:UniProtKB:P08722		1	0	0	0	0	0	0
149	PFR_JS15-1_148	Putative exonuclease of the beta-lactamase fold	177159	178553	+	PROKKA_00149	Ribonuclease	177159	178553	+	3.1.-.-		similar to AA sequence:UniProtKB:Q5SLP1		0	0	0	0	0	0	0
150	PFR_JS15-1_149	Putative OmpR family two-component response	178550	179269	+	PROKKA_00150	Alkaline phosphatase synthesis transcriptional regulatory protein PhoP	178550	179269	+		phoP	similar to AA sequence:UniProtKB:P13792		1	0	0	0	0	0	0
151	PFR_JS15-1_150	Two-component system, sensory transduction	179266	180555	+	PROKKA_00151	Signal transduction histidine-protein kinase BaeS	179266	180555	+	2.7.13.3	baeS	similar to AA sequence:UniProtKB:P30847		1	0	0	0	0	0	0
152	PFR_JS15-1_151	Putative periplasmic or exported protein	180617	181264	-	PROKKA_00152	hypothetical protein	180617	181264	-					1	0	0	0	0	0	0
153	PFR_JS15-1_152	Probable thiol peroxidase	181625	182122	+	PROKKA_00153	putative thiol peroxidase	181625	182122	+	1.11.1.-	tpx	similar to AA sequence:UniProtKB:Q8NRG3		1	0	0	0	0	0	0
154	PFR_JS15-1_153	Transcriptional regulator, Sir2 family	182290	183036	-	PROKKA_00154	NAD-dependent protein deacetylase	182290	183036	-	3.5.1.-	cobB_1	similar to AA sequence:UniProtKB:Q9WYW0		1	0	0	0	0	0	0
155	PFR_JS15-1_154	Putative CONSERVED PROTEIN CPSA	183237	184946	+	PROKKA_00155	Transcriptional regulator LytR	183237	184946	+		lytR	similar to AA sequence:UniProtKB:Q02115		1	0	0	0	0	0	0
156	PFR_JS15-1_155	Argininosuccinate synthase	185601	187037	-	PROKKA_00156	Argininosuccinate synthase	185601	187037	-	6.3.4.5	argG	similar to AA sequence:UniProtKB:Q06734		1	0	0	0	0	0	0
157	PFR_JS15-1_156	NAD(P)H quinone oxidoreductase, PIG3 family	187199	188206	-	PROKKA_00157	Quinone oxidoreductase 1	187199	188206	-	1.6.5.5	qorA	similar to AA sequence:UniProtKB:P28304		1	0	0	0	0	0	0
158						PROKKA_00158	tRNA-Ser(tga)	188230	188315	+			COORDINATES:profile:Aragorn:1.2		0					0	0
159	PFR_JS15-1_157	Membrane protein without function	188420	188857	+	PROKKA_00159	hypothetical protein	188420	188857	+					1	0	0	0	0	0	0
160	PFR_JS15-1_158	Cell envelope-related transcriptional attenuator	189239	191836	-	PROKKA_00160	Biofilm regulatory protein A precursor	189239	191836	-		brpA	similar to AA sequence:UniProtKB:Q8DVR0		1	0	0	0	0	0	0
161						PROKKA_00161	tRNA-Ser(gct)	192076	192168	+			COORDINATES:profile:Aragorn:1.2		0					0	0
162						PROKKA_00162	tRNA-Arg(acg)	192353	192428	+			COORDINATES:profile:Aragorn:1.2		0					0	0
163	PFR_JS15-1_159	Hypothetical protein	192796	193056	-	PROKKA_00163	hypothetical protein	192796	193056	-					0	0	0	0	0	0	0
164	PFR_JS15-1_160	RDD family protein	193004	194092	-	PROKKA_00164	VanZ like family protein	193004	194092	-			protein motif:Pfam:PF04892.6		1	0	0	0	0	0	0
165	PFR_JS15-1_161	Oxidoreductase, short chain	194284	194967	+	PROKKA_00165	putative oxidoreductase	194284	194967	+	1.-.-.-		similar to AA sequence:UniProtKB:Q99RF5		1	0	0	0	0	0	0
166	PFR_JS15-1_162	Glycerophosphoryl diester phosphodiesterase	194964	195683	+	PROKKA_00166	putative glycerophosphoryl diester phosphodiesterase 1	194964	195683	+	3.1.4.46	glpQ1	similar to AA sequence:UniProtKB:P96236		1	0	0	0	0	0	0
167	PFR_JS15-1_163	Shikimate 5-dehydrogenase aroE	195782	196600	-	PROKKA_00167	Shikimate dehydrogenase	195782	196600	-	1.1.1.25	aroE	similar to AA sequence:UniProtKB:Q5HNV1		1	0	0	0	0	0	0
168	PFR_JS15-1_164	3-carboxymuconate cyclase (Precursor)	196687	197736	+	PROKKA_00168	6-phosphogluconolactonase	196687	197736	+	3.1.1.31	pgl_1	similar to AA sequence:UniProtKB:P52697		0	0	0	0	0	0	0
169	PFR_JS15-1_165	2,5-diketo-D-gluconic acid reductase A	197841	198683	+	PROKKA_00169	2,5-diketo-D-gluconic acid reductase A	197841	198683	+	1.1.1.274	dkgA	similar to AA sequence:UniProtKB:Q46857		0	0	0	0	0	0	0
170	PFR_JS15-1_166	ABC transporter associated permease	198837	201293	-	PROKKA_00170	ABC transporter permease YtrF precursor	198837	201293	-		ytrF_2	similar to AA sequence:UniProtKB:O35005		0	0	0	0	0	0	0
171	PFR_JS15-1_167	ABC transporter	201293	202171	-	PROKKA_00171	Macrolide export ATP-binding/permease protein MacB	201293	202171	-	3.6.3.-	macB_1	similar to AA sequence:UniProtKB:Q2EHL8		0	0	0	0	0	0	0
172	PFR_JS15-1_168	Response regulator receiver domain protein	202449	203135	-	PROKKA_00172	Oxygen regulatory protein NreC	202449	203135	-		nreC_2	similar to AA sequence:UniProtKB:Q7WZY4		0	0	0	0	0	0	0
173	PFR_JS15-1_169	ATPase/histidine kinase/DNA gyrase B/HSP90 domain	203125	204447	-	PROKKA_00173	Sensor histidine kinase DesK	203125	204447	-	2.7.13.3	desK_2	similar to AA sequence:UniProtKB:O34757		0	0	0	0	0	0	0
174	PFR_JS15-1_170	Carboxylesterase type B	204593	205300	-	PROKKA_00174	hypothetical protein	204593	205300	-					0	0	0	0	0	0	0
175	PFR_JS15-1_171	Membrane protein containing DUF1211	205406	206023	+	PROKKA_00175	hypothetical protein	205406	206023	+					1	0	0	0	0	0	0
176	PFR_JS15-1_172	Hypothetical protein	206273	206500	+	PROKKA_00176	hypothetical protein	206273	206500	+					1	0	0	0	0	0	0
177	PFR_JS15-1_173	Hypothetical protein	206589	206822	+	PROKKA_00177	hypothetical protein	206589	206822	+					1	0	0	0	0	0	0
178	PFR_JS15-1_174	Peptidylprolyl isomerase	206956	207330	-	PROKKA_00178	FK506-binding protein	206956	207330	-	5.2.1.8	fkbP_1	similar to AA sequence:UniProtKB:P28725		1	0	0	0	0	0	0
179	PFR_JS15-1_175	Panthothenate kinase	207327	208025	-	PROKKA_00179	Pantothenate kinase	207327	208025	-	2.7.1.33	coaA_1	similar to AA sequence:UniProtKB:Q83EV9		1	0	0	0	0	0	0
180	PFR_JS15-1_176	DNA polymerase III, epsilon subunit	208178	208789	+	PROKKA_00180	DNA polymerase III PolC-type	208178	208789	+	2.7.7.7	polC_2	similar to AA sequence:UniProtKB:Q9ZHF6		1	0	0	0	0	0	0
181	PFR_JS15-1_177	Cytochrome D ubiquinol oxidase, subunit 1 domain	209141	210643	+	PROKKA_00181	Cytochrome bd ubiquinol oxidase subunit 1	209141	210643	+	1.10.3.-	cydA	similar to AA sequence:UniProtKB:Q09049		1	0	0	0	0	0	0
182	PFR_JS15-1_178	Cytochrome d ubiquinol oxidase, subunit II	210660	211793	+	PROKKA_00182	Cytochrome bd-I ubiquinol oxidase subunit 2	210660	211793	+	1.10.3.10	cydB	similar to AA sequence:UniProtKB:P0ABK2		1	0	0	0	0	0	0
183	PFR_JS15-1_179	ABC transporter	211817	215461	+	PROKKA_00183	ATP-binding/permease protein CydD	211817	215461	+		cydD	similar to AA sequence:UniProtKB:P29018		1	0	0	0	0	0	0
184	PFR_JS15-1_180	Succinyl-diaminopimelate desuccinylase	215899	217182	-	PROKKA_00184	putative succinyl-diaminopimelate desuccinylase	215899	217182	-	3.5.1.18	dapE_1	similar to AA sequence:UniProtKB:Q99SN6		1	0	0	0	0	0	0
185	PFR_JS15-1_181	Drug resistance transporter, EmrB/QacA subfamily	217320	219017	-	PROKKA_00185	putative transport protein HsrA	217320	219017	-		hsrA_1	similar to AA sequence:UniProtKB:P31474		0	0	0	0	0	0	0
186	PFR_JS15-1_182	Hypothetical protein	219471	219620	-	PROKKA_00186	hypothetical protein	219471	219620	-					1	0	0	0	0	0	0
187	PFR_JS15-1_183	Hypothetical protein	219599	220093	-	PROKKA_00187	transcriptional regulator BetI	219599	220093	-			protein motif:CLUSTERS:PRK00767		0	0	0	0	0	0	0
188	PFR_JS15-1_184	Protein of hypothetical function DUF77	220297	220614	+	PROKKA_00188	hypothetical protein	220297	220614	+					1	0	0	0	0	0	0
189	PFR_JS15-1_185	TRNA uridine 5-carboxymethylaminomethyl	220938	222569	+	PROKKA_00189	NAD-dependent dihydropyrimidine dehydrogenase subunit PreT	220938	222569	+	1.3.1.1	preT	similar to AA sequence:UniProtKB:P76440		1	0	0	0	0	0	0
190	PFR_JS15-1_186	Pyruvate-flavodoxin oxidoreductase (Precursor)	222575	226342	+	PROKKA_00190	Pyruvate-flavodoxin oxidoreductase	222575	226342	+	1.2.7.-	nifJ_1	similar to AA sequence:UniProtKB:Q06879		1	0	0	0	0	0	0
191	PFR_JS15-1_187	Dihydroorotate dehydrogenase 2	226344	227492	+	PROKKA_00191	NAD-dependent dihydropyrimidine dehydrogenase subunit PreA	226344	227492	+	1.3.1.1	preA_1	similar to AA sequence:UniProtKB:P25889		1	0	0	0	0	0	0
192	PFR_JS15-1_188	Putative aminobutyraldehyde dehydrogenase	227752	229176	-	PROKKA_00192	Gamma-aminobutyraldehyde dehydrogenase	227752	229176	-	1.2.1.19	prr	similar to AA sequence:UniProtKB:P77674		1	0	0	0	0	0	0
193	PFR_JS15-1_189	Hypothetical protein	229727	230026	+	PROKKA_00193	hypothetical protein	229727	230026	+					1	0	0	0	0	0	0
194	PFR_JS15-1_190	Hypothetical protein	230061	230270	+	PROKKA_00194	hypothetical protein	230061	230270	+					1	0	0	0	0	0	0
195	PFR_JS15-1_191	Hypothetical protein	230342	230476	+	PROKKA_00195	hypothetical protein	230342	230476	+					1	0	0	0	0	0	0
196	PFR_JS15-1_192	Hypothetical protein	230562	230762	+	PROKKA_00196	hypothetical protein	230562	230762	+					1	0	0	0	0	0	0
197	PFR_JS15-1_193	Hypothetical protein	231017	231664	+	PROKKA_00197	hypothetical protein	231017	231664	+					1	0	0	0	0	0	0
198	PFR_JS15-1_194	Histidinol-phosphate/aromatic aminotransferase	231661	232617	+	PROKKA_00198	hypothetical protein	231661	232617	+					1	0	0	0	0	0	0
199	PFR_JS15-1_195	Site-specific recombinase, phage integrase	232848	234137	-	PROKKA_00199	Transposase from transposon Tn916	232848	234137	-		Int-Tn_1	similar to AA sequence:UniProtKB:P22886		0	0	0	0	0	0	0
200	PFR_JS15-1_196	Hypothetical protein	234168	234752	-	PROKKA_00200	Helix-turn-helix domain protein	234168	234752	-			protein motif:Pfam:PF12844.1		0	0	0	0	0	0	0
201	PFR_JS15-1_197	Filamentation induced by cAMP protein Fic	235143	236453	+	PROKKA_00201	Adenosine monophosphate-protein transferase SoFic	235143	236453	+	2.7.7.-		similar to AA sequence:UniProtKB:Q8E9K5		0	0	0	0	0	0	0
202	PFR_JS15-1_198	Methylase involved in ubiquinone/menaquinone	236467	237066	+	PROKKA_00202	Demethylrebeccamycin-D-glucose O-methyltransferase	236467	237066	+	2.1.1.164	rebM_1	similar to AA sequence:UniProtKB:Q8KZ94		0	0	0	0	0	0	0
203	PFR_JS15-1_199	Hypothetical protein	237248	238555	-	PROKKA_00203	hypothetical protein	237248	238555	-					0	0	0	0	0	0	0
204	PFR_JS15-1_200	ATP-dependent exoDNAse (Exonuclease V) alpha	238598	240517	-	PROKKA_00204	ATP-dependent RecD-like DNA helicase	238598	240517	-	3.6.4.12	recD2_1	protein motif:HAMAP:MF_01488		0	0	0	0	0	0	0
205	PFR_JS15-1_201	Hypothetical protein	240667	241107	+	PROKKA_00205	hypothetical protein	240667	241107	+					0	0	0	0	0	0	0
206	PFR_JS15-1_202	Hypothetical protein	241175	241555	+	PROKKA_00206	hypothetical protein	241175	241555	+					0	0	0	0	0	0	0
207	PFR_JS15-1_203	Polyketide cyclase	241559	241951	-	PROKKA_00207	hypothetical protein	241559	241951	-					0	0	0	0	0	0	0
208	PFR_JS15-1_204	Hypothetical membrane anchored protein	242076	242741	+	PROKKA_00208	hypothetical protein	242076	242741	+					0	0	0	0	0	0	0
209	PFR_JS15-1_205	RNA polymerase sigma factor	242738	243310	+	PROKKA_00209	ECF RNA polymerase sigma factor SigE	242738	243310	+		sigE	similar to AA sequence:UniProtKB:A0R2D4		0	0	0	0	0	0	0
210	PFR_JS15-1_206	MarR, Transcriptional regulators	243722	244171	-	PROKKA_00210	DNA-binding transcriptional repressor MarR	243722	244171	-			protein motif:CLUSTERS:PRK11512		0	0	0	0	0	0	0
211	PFR_JS15-1_207	Flavin reductase Short=FR	244273	244908	+	PROKKA_00211	3 beta-hydroxysteroid dehydrogenase/Delta 5-->4-isomerase	244273	244908	+			similar to AA sequence:UniProtKB:O53454		0	0	0	0	0	0	0
212	PFR_JS15-1_208	Transcriptional regulator, AraC family	244926	245825	+	PROKKA_00212	HTH-type transcriptional regulator ChbR	244926	245825	+		chbR	similar to AA sequence:UniProtKB:P17410		0	0	0	0	0	0	0
213	PFR_JS15-1_209	Bifunctional ABC lipid A exporter	246117	248180	-	PROKKA_00213	putative ABC transporter ATP-binding protein	246117	248180	-			similar to AA sequence:UniProtKB:Q9WYC4		1	0	0	0	0	0	0
214	PFR_JS15-1_210	ABC transporter	248177	249910	-	PROKKA_00214	putative ABC transporter ATP-binding protein	248177	249910	-			similar to AA sequence:UniProtKB:Q9WYC4		1	0	0	0	0	0	0
215	PFR_JS15-1_211	Transcription regulator	249910	250602	-	PROKKA_00215	Nucleoid occlusion factor SlmA	249910	250602	-		slmA	protein motif:HAMAP:MF_01839		1	0	0	0	0	0	0
216	PFR_JS15-1_212	Dihydropteroate synthase	250680	251570	-	PROKKA_00216	Inactive dihydropteroate synthase 2	250680	251570	-		folP2	similar to AA sequence:UniProtKB:P64139		1	0	0	0	0	0	0
217	PFR_JS15-1_213	Amino acid permease	251823	253325	+	PROKKA_00217	Aromatic amino acid transport protein AroP	251823	253325	+		aroP_1	similar to AA sequence:UniProtKB:P15993		1	0	0	0	0	0	0
218	PFR_JS15-1_214	Conserved protein, contains double-stranded	253489	253848	+	PROKKA_00218	Cupin domain protein	253489	253848	+			protein motif:Pfam:PF07883.5		1	0	0	0	0	0	0
219	PFR_JS15-1_215	Ubiquinone/menaquinone biosynthesis	254120	254779	+	PROKKA_00219	Methyltransferase domain protein	254120	254779	+			protein motif:Pfam:PF08241.6		1	0	0	0	0	0	0
220	PFR_JS15-1_216	VarM	255069	256763	+	PROKKA_00220	putative ABC transporter ATP-binding protein YheS	255069	256763	+		yheS_1	similar to AA sequence:UniProtKB:P63389		1	0	0	0	0	0	0
221	PFR_JS15-1_217	Lysine--tRNA ligase (Precursor)	256904	258514	+	PROKKA_00221	Lysylphosphatidylglycerol biosynthesis bifunctional protein LysX	256904	258514	+		lysX_1	similar to AA sequence:UniProtKB:P94974		1	0	0	0	0	0	0
222	PFR_JS15-1_218	Methyltransferase type 11	258700	259422	-	PROKKA_00222	Tellurite methyltransferase	258700	259422	-	2.1.1.265	tehB	similar to AA sequence:UniProtKB:P25397		1	0	0	0	0	0	0
223	PFR_JS15-1_219	Branched-chain alpha-keto acid dehydrogenase	259567	260679	+	PROKKA_00223	3-methyl-2-oxobutanoate dehydrogenase subunit alpha	259567	260679	+	1.2.4.4	bkdA	similar to AA sequence:UniProtKB:O06161		1	0	0	0	0	0	0
224	PFR_JS15-1_220	Transketolase, pyridine binding domain protein	260676	261650	+	PROKKA_00224	3-methyl-2-oxobutanoate dehydrogenase subunit beta	260676	261650	+	1.2.4.4	bkdB	similar to AA sequence:UniProtKB:O06160		0	0	0	0	0	0	0
225	PFR_JS15-1_221	Dihydrolipoamide acyltransferase	261661	263007	+	PROKKA_00225	Dihydrolipoyllysine-residue acetyltransferase component of pyruvate dehydrogenase complex	261661	263007	+	2.3.1.12	pdhC	similar to AA sequence:UniProtKB:P21883		0	0	0	0	0	0	0
226	PFR_JS15-1_222	Putative chemotaxis protein, resembles CheA	263233	264267	-	PROKKA_00226	hypothetical protein	263233	264267	-					1	0	0	0	0	0	0
227	PFR_JS15-1_223	Hypothetical protein	264583	264870	-	PROKKA_00227	Cell division protein CrgA	264583	264870	-		crgA	similar to AA sequence:UniProtKB:Q9XA10		0	0	0	0	0	0	0
228	PFR_JS15-1_224	Membrane spanning protein DUF881	265049	265783	+	PROKKA_00228	hypothetical protein	265049	265783	+					1	0	0	0	0	0	0
229	PFR_JS15-1_225	Para-aminobenzoate synthase	265896	266540	+	PROKKA_00229	Aminodeoxychorismate synthase component 2	265896	266540	+	2.6.1.85	pabA	similar to AA sequence:UniProtKB:P00903		1	0	0	0	0	0	0
230	PFR_JS15-1_226	YeaE protein	266582	267466	-	PROKKA_00230	2,5-diketo-D-gluconic acid reductase B	266582	267466	-	1.1.1.346	dkgB	similar to AA sequence:UniProtKB:P30863		1	0	0	0	0	0	0
231	PFR_JS15-1_227	Hypothetical protein	267556	267930	-	PROKKA_00231	hypothetical protein	267556	267930	-					0	0	0	0	0	0	0
232	PFR_JS15-1_228	Hypothetical protein	268273	268644	-	PROKKA_00232	hypothetical protein	268273	268644	-					0	0	0	0	0	0	0
233	PFR_JS15-1_229	Hypothetical protein	268959	272354	-	PROKKA_00233	hypothetical protein	268959	272354	-					1	0	0	0	0	0	0
234	PFR_JS15-1_230	Hypothetical protein	272512	273252	+	PROKKA_00234	hypothetical protein	272512	273252	+					1	0	0	0	0	0	0
235	PFR_JS15-1_231	Secreted serine protease, trypsin-like serine	273256	274698	-	PROKKA_00235	putative periplasmic serine endoprotease DegP-like precursor	273256	274698	-	3.4.21.107	mucD	similar to AA sequence:UniProtKB:Q4KGQ4		1	0	0	0	0	0	1
236	PFR_JS15-1_232	Trypsin-like serine protease	275251	276615	-	PROKKA_00236	putative periplasmic serine endoprotease DegP-like precursor	275251	276615	-	3.4.21.107	degP1	similar to AA sequence:UniProtKB:Q52894		0	0	0	0	0	0	1
237	PFR_JS15-1_233	Hypothetical protein	276833	277177	+	PROKKA_00237	Transposase	276833	277177	+			protein motif:Pfam:PF01527.14		0	2	1	1	0	0	1
238	PFR_JS15-1_234	Putative IS1236 transposase	277174	278082	+	PROKKA_00238	Integrase core domain protein	277174	278082	+			protein motif:Pfam:PF00665.20		0	2	1	1	0	0	1
239	PFR_JS15-1_235	Pyridine nucleotide-disulfide oxidoreductase	278596	279951	-	PROKKA_00239	Mercuric reductase	278596	279951	-	1.16.1.1	merA_1	similar to AA sequence:UniProtKB:P16171		0	2	1	1	0	0	1
240	PFR_JS15-1_236	Transposase, ISlxx5	280101	281354	-	PROKKA_00240	Integrase core domain protein	280101	281354	-			protein motif:Pfam:PF00665.20		0	2	1	1	0	0	1
241	PFR_JS15-1_237	Uma4 protein	281666	282973	-	PROKKA_00241	Transposase	281666	282973	-			protein motif:Pfam:PF01610.11		0	2	1	1	0	0	1
242	PFR_JS15-1_238	GalE protein	283216	284211	-	PROKKA_00242	UDP-glucose 4-epimerase	283216	284211	-	5.1.3.2	galE_1	similar to AA sequence:UniProtKB:Q7WTB1	Lac_island	0	2	1	1	0	0	1
243	PFR_JS15-1_239	Sugar transporter, GPH family	284257	285645	-	PROKKA_00243	Inner membrane symporter YicJ	284257	285645	-		yicJ	similar to AA sequence:UniProtKB:P31435	Lac_island	0	1	0	1	0	0	0
244	PFR_JS15-1_240	Glycosyl hydrolase, family 2	285668	288736	-	PROKKA_00244	Evolved beta-galactosidase subunit alpha	285668	288736	-	3.2.1.23	ebgA	similar to AA sequence:UniProtKB:P06864	Lac_island	0	1	0	1	0	0	0
245	PFR_JS15-1_241	Transcriptional regulator, RpiR family	289085	290038	+	PROKKA_00245	HTH-type transcriptional regulator MurR	289085	290038	+		murR	similar to AA sequence:UniProtKB:P77245		0	1	0	1	0	0	0
246	PFR_JS15-1_242	Putative insertion element ISCmi2 transposase	290000	290833	-	PROKKA_00246	IS2 transposase TnpB	290000	290833	-			protein motif:CLUSTERS:PRK09409		0	1	0	1	0	0	0
247	PFR_JS15-1_243	Hypothetical protein	290857	291228	-	PROKKA_00247	hypothetical protein	290857	291228	-					0	1	0	1	0	0	0
248	PFR_JS15-1_244	Probable carnitine operon oxidoreductase	291407	292543	+	PROKKA_00248	Crotonobetainyl-CoA dehydrogenase	291407	292543	+	1.3.99.-	caiA	similar to AA sequence:UniProtKB:P60584		0	1	0	1	0	0	0
249	PFR_JS15-1_245	Hypothetical protein	292613	293839	+	PROKKA_00249	Crotonobetainyl-CoA:carnitine CoA-transferase	292613	293839	+	2.8.3.-	caiB	similar to AA sequence:UniProtKB:Q8GB19		0	1	0	1	0	0	0
250	PFR_JS15-1_246	AMP-dependent synthetase/ligase	293870	295465	+	PROKKA_00250	putative sulfoacetate--CoA ligase	293870	295465	+	6.2.1.-	sauT	similar to AA sequence:UniProtKB:Q0K844		0	0	0	0	0	0	0
251	PFR_JS15-1_247	UfaA2 protein	295462	296340	+	PROKKA_00251	MaoC like domain protein	295462	296340	+			protein motif:Pfam:PF01575.13		0	0	0	0	0	0	0
252	PFR_JS15-1_248	Metabolite transport protein YaaU	296551	297909	+	PROKKA_00252	Inner membrane metabolite transport protein YgcS	296551	297909	+		ygcS_1	similar to AA sequence:UniProtKB:Q46909		0	0	0	0	0	0	0
253	PFR_JS15-1_249	YqgX	297914	298558	+	PROKKA_00253	putative metallo-hydrolase	297914	298558	+	3.-.-.-		similar to AA sequence:UniProtKB:Q5XD24		0	0	0	0	0	0	0
254	PFR_JS15-1_250	Electron transfer flavoprotein	298742	299497	+	PROKKA_00254	Electron transfer flavoprotein subunit beta	298742	299497	+		etfB	similar to AA sequence:UniProtKB:P38975		1	0	0	0	0	0	0
255	PFR_JS15-1_251	Electron transfer flavoprotein FAD-binding domain	299534	300406	+	PROKKA_00255	Electron transfer flavoprotein subunit alpha	299534	300406	+		etfA	similar to AA sequence:UniProtKB:P38974		1	0	0	0	0	0	0
256	PFR_JS15-1_252	FAD dependent oxidoreductase	300409	301713	+	PROKKA_00256	Electron transfer flavoprotein-ubiquinone oxidoreductase	300409	301713	+	1.5.5.1		similar to AA sequence:UniProtKB:Q9HZP5		1	0	0	0	0	0	0
257	PFR_JS15-1_253	Ferredoxin-like protein fixX	301727	302020	+	PROKKA_00257	hypothetical protein	301727	302020	+					1	0	0	0	0	0	0
258	PFR_JS15-1_254	Hypothetical protein	302171	303076	+	PROKKA_00258	IgA FC receptor precursor	302171	303076	+		bag	similar to AA sequence:UniProtKB:P27951		0	0	0	0	0	0	0
259	PFR_JS15-1_255	Hypothetical protein	303878	304120	-	PROKKA_00259	hypothetical protein	303878	304120	-					0	0	0	0	0	0	0
260	PFR_JS15-1_256	Protein involving differentiation	304124	305896	+	PROKKA_00260	Type III restriction enzyme, res subunit	304124	305896	+			protein motif:Pfam:PF04851.9		1	0	0	0	0	0	0
261	PFR_JS15-1_257	SanA protein	306149	306820	+	PROKKA_00261	vancomycin high temperature exclusion protein	306149	306820	+			protein motif:CLUSTERS:PRK10834		1	0	0	0	0	0	0
262	PFR_JS15-1_258	UDP-glucose 6-dehydrogenase udgA	306908	308419	-	PROKKA_00262	UDP-glucose 6-dehydrogenase TuaD	306908	308419	-	1.1.1.22	tuaD	similar to AA sequence:UniProtKB:O32271		1	0	0	0	0	0	0
263	PFR_JS15-1_259	Arginine--tRNA ligase 1 (Precursor)	308460	310052	+	PROKKA_00263	Arginine--tRNA ligase	308460	310052	+	6.1.1.19	argS	similar to AA sequence:UniProtKB:P11875		1	0	0	0	0	0	0
264	PFR_JS15-1_260	Iron-siderophore uptake system ATP-binding	310230	311120	-	PROKKA_00264	putative siderophore transport system ATP-binding protein YusV	310230	311120	-		yusV_1	similar to AA sequence:UniProtKB:O32188		1	0	0	0	0	0	0
265	PFR_JS15-1_261	Ferric enterobactin transport system permease	311117	312199	-	PROKKA_00265	Ferric enterobactin transport system permease protein FepG	311117	312199	-		fepG	similar to AA sequence:UniProtKB:P23877		1	0	0	0	0	0	0
266	PFR_JS15-1_262	Ferric enterobactin transport system permease	312196	313254	-	PROKKA_00266	Ferric enterobactin transport system permease protein FepD	312196	313254	-		fepD	similar to AA sequence:UniProtKB:P23876		1	0	0	0	0	0	0
267	PFR_JS15-1_263	ABC-type Fe3-siderophores transport systems,	313502	314497	+	PROKKA_00267	putative siderophore-binding lipoprotein YfiY precursor	313502	314497	+		yfiY	similar to AA sequence:UniProtKB:O31567		1	0	0	0	0	0	0
268	PFR_JS15-1_264	Polyphosphate glucokinase/transcriptional	314676	315479	-	PROKKA_00268	Polyphosphate glucokinase	314676	315479	-	2.7.1.63	ppgK	similar to AA sequence:UniProtKB:A5U654		1	0	0	0	0	0	0
269	PFR_JS15-1_265	Putative Sodium:sulfate symportert	315573	316970	-	PROKKA_00269	Citrate carrier	315573	316970	-		citT	similar to AA sequence:UniProtKB:P0AE74		1	0	0	0	0	0	0
270	PFR_JS15-1_266	Putative UDP-GlcNAc C4 epimerase	317283	318257	+	PROKKA_00270	UDP-glucose 4-epimerase	317283	318257	+	5.1.3.2	galE_2	similar to AA sequence:UniProtKB:Q7WTB1		1	0	0	0	0	0	0
271	PFR_JS15-1_267	Transcriptional regulator TetR	318304	318996	-	PROKKA_00271	HTH-type transcriptional repressor KstR2	318304	318996	-		kstR2_1	similar to AA sequence:UniProtKB:Q0S7V2		0	0	0	0	0	0	0
272	PFR_JS15-1_268	Thermostable beta-glucosidase B	319321	321720	+	PROKKA_00272	Thermostable beta-glucosidase B	319321	321720	+	3.2.1.21	bglB	similar to AA sequence:UniProtKB:P14002		1	0	0	0	0	0	0
273	PFR_JS15-1_269	Hypothetical protein	321601	321963	-	PROKKA_00273	hypothetical protein	321601	321963	-					0	0	0	0	0	0	0
274	PFR_JS15-1_270	Putative metabolite transport protein YaaU	322122	323510	+	PROKKA_00274	Inner membrane metabolite transport protein YgcS	322122	323510	+		ygcS_2	similar to AA sequence:UniProtKB:Q46909		1	0	0	0	0	0	0
275	PFR_JS15-1_271	Metallophosphoesterase	323503	325179	+	PROKKA_00275	hypothetical protein	323503	325179	+					1	0	0	0	0	0	0
276	PFR_JS15-1_272	Mg2 transporter-C, MgtC family	325186	325914	+	PROKKA_00276	putative Mg(2+) transport ATPase	325186	325914	+			protein motif:CLUSTERS:PRK09977		1	0	0	0	0	0	0
277	PFR_JS15-1_273	Uma4 protein	325984	327291	-	PROKKA_00277	Transposase	325984	327291	-			protein motif:Pfam:PF01610.11		0	0	0	0	0	0	0
278	PFR_JS15-1_274	Sn-glycerol-3-phosphate transporter GlpT	327639	329057	+	PROKKA_00278	Glycerol-3-phosphate transporter	327639	329057	+		glpT	similar to AA sequence:UniProtKB:P08194		1	0	0	0	0	0	0
279	PFR_JS15-1_275	Hypothetical protein	329347	329550	-	PROKKA_00279	hypothetical protein	329347	329550	-					0	0	0	0	0	0	0
280	PFR_JS15-1_276	NUDIX hydrolase	329643	330086	-	PROKKA_00280	CTP pyrophosphohydrolase	329643	330086	-	3.6.1.65	nudG	similar to AA sequence:UniProtKB:P77788		0	0	0	0	0	0	0
281	PFR_JS15-1_277	Putative DNA mismatch endonuclease	330170	330604	-	PROKKA_00281	Very short patch repair protein	330170	330604	-	3.1.-.-	vsr	similar to AA sequence:UniProtKB:P09184		0	1	1	0	0	0	0
282	PFR_JS15-1_278	Hypothetical protein	330588	336224	-	PROKKA_00282	AAA-like domain protein	330588	336224	-			protein motif:Pfam:PF12846.1		0	1	1	0	0	0	0
283	PFR_JS15-1_279	Hypothetical protein	336298	337749	-	PROKKA_00283	hypothetical protein	336298	337749	-					0	1	1	0	0	0	0
284	PFR_JS15-1_280	Hypothetical protein	337739	339850	-	PROKKA_00284	hypothetical protein	337739	339850	-					0	1	1	0	0	0	0
285	PFR_JS15-1_281	Modification methylase (Cytosine-specific	339847	341505	-	PROKKA_00285	Modification methylase HaeIII	339847	341505	-	2.1.1.37	haeIIIM	similar to AA sequence:UniProtKB:P20589		0	1	1	0	0	0	0	M.PfrJS15II
286	PFR_JS15-1_282	Carbohydrate kinase, PfkB family	341654	342658	-	PROKKA_00286	Ribokinase	341654	342658	-	2.7.1.15	rbsK_1	similar to AA sequence:UniProtKB:P0A9J6		0	0	0	0	0	0	0
287	PFR_JS15-1_283	Permease, cytosine/purine, uracil, thiamine,	342655	344175	-	PROKKA_00287	Permease for cytosine/purines, uracil, thiamine, allantoin	342655	344175	-			protein motif:Pfam:PF02133.9		1	0	0	0	0	0	0
288	PFR_JS15-1_284	YktC (Inositol monophosphatase SuhB)	344353	345204	-	PROKKA_00288	Inositol-1-monophosphatase ImpA	344353	345204	-	3.1.3.25	impA	similar to AA sequence:UniProtKB:A0QX86		1	0	0	0	0	0	0
289	PFR_JS15-1_285	Sugar phosphate antiporter	345197	346645	-	PROKKA_00289	Hexose phosphate transport protein	345197	346645	-		uhpT	similar to AA sequence:UniProtKB:P0AGC0		0	0	0	0	0	0	0
290	PFR_JS15-1_286	Acetyl-CoA C-acetyltransferase vraB	347025	348179	-	PROKKA_00290	Acetyl-CoA acetyltransferase	347025	348179	-	2.3.1.9	thlA	similar to AA sequence:UniProtKB:P45359		1	0	0	0	0	0	0
291	PFR_JS15-1_287	Putative long chain fatty acid-CoA ligase VraA	348176	349234	-	PROKKA_00291	putative acyl--CoA ligase YhfT	348176	349234	-	6.2.1.-	yhfT	similar to AA sequence:UniProtKB:O07619		0	0	0	0	0	0	0
292	PFR_JS15-1_288	Hypothetical protein	349404	349622	+	PROKKA_00292	CsbD-like protein	349404	349622	+			protein motif:Pfam:PF05532.6		0	0	0	0	0	0	0
293	PFR_JS15-1_289	CAAX amino terminal protease self-immunity	349677	350492	+	PROKKA_00293	CAAX amino terminal protease self- immunity	349677	350492	+			protein motif:Pfam:PF02517.10		0	0	0	0	0	0	0
294	PFR_JS15-1_290	Hypothetical protein	350522	350701	+	PROKKA_00294	hypothetical protein	350522	350701	+					0	1	0	1	0	0	0
295	PFR_JS15-1_291	Starvation-induced DNA protecting protein	350859	351386	+	PROKKA_00295	DNA protection during starvation protein 2	350859	351386	+	1.16.-.-	dps2	similar to AA sequence:UniProtKB:Q9RZN1		1	1	0	1	0	0	0
296	PFR_JS15-1_292	Transposase for insertion sequence element	351719	352474	+	PROKKA_00296	Transposase	351719	352474	+			protein motif:Pfam:PF01610.11		0	2	1	1	0	0	0
297	PFR_JS15-1_293	Transposase of ISAar20, ISL3 family	352536	353654	+	PROKKA_00297	Transposase	352536	353654	+			protein motif:Pfam:PF01610.11		0	2	1	1	0	0	0
298	PFR_JS15-1_294	Transposase of ISAar20, ISL3 family	353642	354715	-	PROKKA_00298	Transposase	353642	354715	-			protein motif:Pfam:PF01610.11		0	2	1	1	0	0	0
299	PFR_JS15-1_295	Transposase of ISAar43, IS3 family, IS407 group,	354841	355125	+	PROKKA_00299	Transposase	354841	355125	+			protein motif:Pfam:PF01527.14		0	2	1	1	0	0	0
300	PFR_JS15-1_296	Insertion sequence IS407 OrfB	355176	355991	+	PROKKA_00300	Integrase core domain protein	355176	355991	+			protein motif:Pfam:PF00665.20		0	2	1	1	0	0	0
301	PFR_JS15-1_297	Hypothetical protein	356448	356816	-	PROKKA_00301	hypothetical protein	356448	356816	-					0	2	1	1	0	0	0
302	PFR_JS15-1_298	YbfG	356918	359068	-	PROKKA_00302	Putative peptidoglycan binding domain protein	356918	359068	-			protein motif:Pfam:PF01471.12		0	2	1	1	0	0	0
303	PFR_JS15-1_299	Transposase of ISAar20, ISL3 family	359992	360987	+	PROKKA_00303	Transposase	359992	360987	+			protein motif:Pfam:PF01610.11		0	1	0	1	0	0	0
304	PFR_JS15-1_300	Hypothetical protein	361079	361651	+	PROKKA_00304	hypothetical protein	361079	361651	+					0	1	0	1	0	0	0
305	PFR_JS15-1_301	Hypothetical protein	361865	362002	+	PROKKA_00305	hypothetical protein	361865	362002	+					0	1	0	1	0	0	0
306	PFR_JS15-1_302	Transposase of ISAar20, ISL3 family	362346	363422	+	PROKKA_00306	Transposase	362346	363422	+			protein motif:Pfam:PF01610.11		0	1	0	1	0	0	0
307	PFR_JS15-1_303	Endonuclease and methylase LlaGI	363908	368698	-	PROKKA_00307	Type III restriction enzyme, res subunit	363908	368698	-			protein motif:Pfam:PF04851.9		0	1	0	1	0	0	0	PfrJS15III
308	PFR_JS15-1_304	SecB-like chaperone Rv1957	368889	369368	-	PROKKA_00308	SecB-like chaperone	368889	369368	-		secBL	similar to AA sequence:UniProtKB:P95257		0	1	0	1	0	0	0
309	PFR_JS15-1_305	Proteins of Bacteriophage / transcription	369368	369760	-	PROKKA_00309	Antitoxin HigA	369368	369760	-		higA	similar to AA sequence:UniProtKB:P95258		0	1	0	1	0	0	0
310	PFR_JS15-1_306	Hypothetical protein	369862	370218	-	PROKKA_00310	Toxin HigB	369862	370218	-		higB	similar to AA sequence:UniProtKB:P95259		0	2	1	1	0	0	0
311	PFR_JS15-1_307	Uma4 protein	370462	371535	-	PROKKA_00311	Transposase	370462	371535	-			protein motif:Pfam:PF01610.11		0	2	1	1	0	0	0
312	PFR_JS15-1_308	Hypothetical protein	372087	373067	+	PROKKA_00312	EcsC protein family protein	372087	373067	+			protein motif:Pfam:PF12787.1		0	2	1	1	0	0	0
313	PFR_JS15-1_309	IS1096, TnpA family protein	373700	374254	+	PROKKA_00313	hypothetical protein	373700	374254	+					0	2	1	1	0	0	0
314	PFR_JS15-1_310	Hypothetical protein	374518	375315	-	PROKKA_00314	hypothetical protein	374518	375315	-					0	1	1	0	0	0	0
315	PFR_JS15-1_311	Transposase of ISAar20, ISL3 family	375431	376738	-	PROKKA_00315	Transposase	375431	376738	-			protein motif:Pfam:PF01610.11		0	1	1	0	0	0	0
316						PROKKA_00316	tRNA-Gly(ccc)	377144	377217	-			COORDINATES:profile:Aragorn:1.2		0					0	0
317	PFR_JS15-1_312	Hypothetical protein	377303	377998	-	PROKKA_00317	hypothetical protein	377303	377998	-					1	0	0	0	0	0	0
318	PFR_JS15-1_313	Hypothetical protein	378183	379739	-	PROKKA_00318	hypothetical protein	378183	379739	-					0	0	0	0	0	0	0
319	PFR_JS15-1_314	Pyrophosphatase PpaX	380247	380900	+	PROKKA_00319	Pyrophosphatase PpaX	380247	380900	+	3.6.1.1	ppaX	similar to AA sequence:UniProtKB:Q9JMQ2		1	0	0	0	0	0	0
320	PFR_JS15-1_315	D-isomer specific 2-hydroxyacid dehydrogenase	380979	382028	+	PROKKA_00320	D-2-hydroxyisocaproate dehydrogenase	380979	382028	+	1.1.1.-		similar to AA sequence:UniProtKB:P17584		0	0	0	0	0	0	0
321	PFR_JS15-1_316	2-deoxy-D-gluconate 3-dehydrogenase KduD	382068	382880	+	PROKKA_00321	2-dehydro-3-deoxy-D-gluconate 5-dehydrogenase	382068	382880	+	1.1.1.127	kduD	similar to AA sequence:UniProtKB:Q05528		0	0	0	0	0	0	0
322	PFR_JS15-1_317	Succinate CoA transferase	383108	384631	-	PROKKA_00322	Succinyl-CoA:coenzyme A transferase	383108	384631	-	2.8.3.-	cat1	similar to AA sequence:UniProtKB:P38946		1	0	0	0	0	0	0
323	PFR_JS15-1_318	Uncharacterized conserved protein UCP033563	384755	385945	-	PROKKA_00323	hypothetical protein	384755	385945	-					1	0	0	0	0	0	0
324	PFR_JS15-1_319	Hypothetical protein	386258	387598	+	PROKKA_00324	hypothetical protein	386258	387598	+					1	0	0	0	0	0	0
325	PFR_JS15-1_320	Isochorismatase hydrolase	387736	388398	-	PROKKA_00325	Isochorismatase family protein	387736	388398	-			protein motif:Pfam:PF00857.14		1	0	0	0	0	0	0
326	PFR_JS15-1_321	Hypothetical protein	388466	388996	-	PROKKA_00326	hypothetical protein	388466	388996	-					0	0	0	0	0	0	0
327	PFR_JS15-1_322	2,5-diketo-D-gluconic acid reductase	389203	390036	-	PROKKA_00327	putative oxidoreductase/MSMEI_2347	389203	390036	-	1.-.-.-		similar to AA sequence:UniProtKB:A0QV10		1	0	0	0	0	0	0
328	PFR_JS15-1_323	Hypothetical protein	390160	390933	-	PROKKA_00328	hypothetical protein	390160	390933	-					0	0	0	0	0	0	0
329	PFR_JS15-1_324	Methyltransferase small domain protein	391140	392129	-	PROKKA_00329	Ribosomal RNA large subunit methyltransferase G	391140	392129	-	2.1.1.174	rlmG	similar to AA sequence:UniProtKB:P42596		0	0	0	0	0	0	0
330	PFR_JS15-1_325	MATE efflux family protein	392180	393544	+	PROKKA_00330	DNA-damage-inducible protein F	392180	393544	+		dinF	similar to AA sequence:UniProtKB:P28303		1	0	0	0	0	0	0
331	PFR_JS15-1_326	Restriction system protein mrr	393760	394701	-	PROKKA_00331	Mrr restriction system protein	393760	394701	-		mrr	similar to AA sequence:UniProtKB:P24202		0	0	0	0	0	0	0	PfrJS15MrrP
332	PFR_JS15-1_327	Protein of hypothetical function DUF299	395213	396106	+	PROKKA_00332	Putative pyruvate, phosphate dikinase regulatory protein	395213	396106	+	2.7.11.32	yqfL	similar to AA sequence:UniProtKB:P54470		1	0	0	0	0	0	0
333	PFR_JS15-1_328	Pyruvate, phosphate dikinase	396315	398972	+	PROKKA_00333	Pyruvate, phosphate dikinase	396315	398972	+	2.7.9.1	ppdK	similar to AA sequence:UniProtKB:P22983		1	0	0	0	0	0	0
334	PFR_JS15-1_329	Hypothetical protein	399472	402288	+	PROKKA_00334	FHA domain protein	399472	402288	+			protein motif:Pfam:PF00498.20		0	0	0	0	0	0	0
335	PFR_JS15-1_330	PfkB family sugar kinase	402524	403516	+	PROKKA_00335	Ribokinase	402524	403516	+	2.7.1.15	rbsK_2	similar to AA sequence:UniProtKB:P0A9J6		1	0	0	0	0	0	0
336	PFR_JS15-1_331	Two-component sensor kinase TcrY	403749	405614	-	PROKKA_00336	putative sensor histidine kinase TcrY	403749	405614	-	2.7.13.3	tcrY	similar to AA sequence:UniProtKB:O69729		1	0	0	0	0	0	0
337	PFR_JS15-1_332	DNA-binding response regulator TrcR	405595	406323	-	PROKKA_00337	putative transcriptional regulatory protein TcrX	405595	406323	-		tcrX	similar to AA sequence:UniProtKB:O69730		1	0	0	0	0	0	0
338	PFR_JS15-1_333	Hypothetical protein	406546	406665	+	PROKKA_00338	hypothetical protein	406546	406665	+					0	0	0	0	0	0	0
339	PFR_JS15-1_334	NLPA lipoprotein	406874	407839	+	PROKKA_00339	Membrane lipoprotein TpN32 precursor	406874	407839	+			similar to AA sequence:UniProtKB:O07950		1	0	0	0	0	0	0
340	PFR_JS15-1_335	Methionine import ATP-binding protein MetN 2	407836	409101	+	PROKKA_00340	Methionine import ATP-binding protein MetN	407836	409101	+	3.6.3.-	metN	similar to AA sequence:UniProtKB:O32169		1	0	0	0	0	0	0
341	PFR_JS15-1_336	ABC D-methionine transporter, permease component	409098	409754	+	PROKKA_00341	Methionine import system permease protein MetP	409098	409754	+		metP	similar to AA sequence:UniProtKB:O32168		1	0	0	0	0	0	0
342	PFR_JS15-1_337	Hypothetical protein	409878	411494	-	PROKKA_00342	Cellulosome-anchoring protein precursor	409878	411494	-		ancA_1	similar to AA sequence:UniProtKB:Q06848		0	0	0	0	0	0	0
343	PFR_JS15-1_338	Hypothetical protein	411567	412229	-	PROKKA_00343	hypothetical protein	411567	412229	-					0	0	0	0	0	0	0
344	PFR_JS15-1_339	Transcriptional regulator	412524	413096	+	PROKKA_00344	Transcriptional regulator YqjI	412524	413096	+		yqjI_1	similar to AA sequence:UniProtKB:P64588		1	0	0	0	0	0	0
345	PFR_JS15-1_340	Putative unusual protein kinase	413139	414836	+	PROKKA_00345	putative protein kinase UbiB	413139	414836	+	2.7.-.-	ubiB_1	similar to AA sequence:UniProtKB:P0A6A0		1	0	0	0	0	0	0
346	PFR_JS15-1_341	Putative hydroxymethylpyrimidine transporter	414924	416240	-	PROKKA_00346	Permease for cytosine/purines, uracil, thiamine, allantoin	414924	416240	-			protein motif:Pfam:PF02133.9		0	0	0	0	0	0	0
347	PFR_JS15-1_342	Phosphomethylpyrimidine kinase	416319	417185	-	PROKKA_00347	Hydroxymethylpyrimidine/phosphomethylpyrimidine kinase	416319	417185	-	2.7.1.49	thiD	similar to AA sequence:UniProtKB:P55882		1	0	0	0	0	0	0
348	PFR_JS15-1_343	Thiamine-phosphate pyrophosphorylase (Precursor)	417182	418021	-	PROKKA_00348	Thiamine-phosphate synthase	417182	418021	-	2.5.1.3	thiE_1	similar to AA sequence:UniProtKB:P66919		0	0	0	0	0	0	0
349	PFR_JS15-1_344	Hydroxyethylthiazole kinase	418030	418890	-	PROKKA_00349	Hydroxyethylthiazole kinase	418030	418890	-	2.7.1.50	thiM	similar to AA sequence:UniProtKB:P39593		0	0	0	0	0	0	0
350	PFR_JS15-1_345	Amino acid permease	419318	420712	+	PROKKA_00350	Aromatic amino acid transport protein AroP	419318	420712	+		aroP_2	similar to AA sequence:UniProtKB:P15993		1	0	0	0	0	0	0
351	PFR_JS15-1_346	Putative zinc transporter ZitB	420829	421779	+	PROKKA_00351	Cadmium, cobalt and zinc/H(+)-K(+) antiporter	420829	421779	+		czcD	similar to AA sequence:UniProtKB:O07084		1	0	0	0	0	0	0
352	PFR_JS15-1_347	Hypothetical protein	422260	422814	+	PROKKA_00352	hypothetical protein	422260	422814	+					1	0	0	0	0	0	0
353	PFR_JS15-1_348	SPFH domain/band 7 family protein	423040	424023	-	PROKKA_00353	FtsH protease regulator HflK	423040	424023	-			protein motif:CLUSTERS:PRK10930		0	0	0	0	0	0	0
354	PFR_JS15-1_349	Hypothetical protein	424408	425340	+	PROKKA_00354	hypothetical protein	424408	425340	+					0	0	0	0	0	0	0
355	PFR_JS15-1_350	Hypothetical protein	425381	425554	-	PROKKA_00355	hypothetical protein	425381	425554	-					0	1	1	0	0	0	0
356	PFR_JS15-1_351	Uma4 protein	426058	427365	-	PROKKA_00356	Transposase	426058	427365	-			protein motif:Pfam:PF01610.11		0	2	1	1	0	0	0
357	PFR_JS15-1_352	Transposase of ISAar43, IS3 family, IS407 group,	427703	427987	+	PROKKA_00357	Transposase	427703	427987	+			protein motif:Pfam:PF01527.14		0	2	1	1	0	0	0
358	PFR_JS15-1_353	Insertion sequence IS407 OrfB	428038	428853	+	PROKKA_00358	Integrase core domain protein	428038	428853	+			protein motif:Pfam:PF00665.20		0	2	1	1	0	0	0
359	PFR_JS15-1_354	Hypothetical protein	429017	429193	-	PROKKA_00359	hypothetical protein	429017	429193	-					0	2	1	1	0	0	0
360	PFR_JS15-1_355	Hypothetical protein	429586	430005	+	PROKKA_00360	hypothetical protein	429586	430005	+					0	2	1	1	0	0	0
361	PFR_JS15-1_356	Hypothetical protein	429992	430192	+	PROKKA_00361	hypothetical protein	429992	430192	+					0	2	1	1	0	0	0
362	PFR_JS15-1_357	Hypothetical protein	430373	430672	+	PROKKA_00362	hypothetical protein	430373	430672	+					0	1	0	1	0	0	0
363	PFR_JS15-1_358	Type III restriction protein res subunit	430673	433837	-	PROKKA_00363	ATP-dependent RNA helicase SrmB	430673	433837	-	3.6.4.13	srmB	similar to AA sequence:UniProtKB:P21507		0	0	0	0	0	0	0	PfrJS15ORF358P		Disrupted by a transposase in the other genome
364	PFR_JS15-1_359	Transporter, anaerobic C4-dicarboxylate uptake	434073	435389	-	PROKKA_00364	Anaerobic C4-dicarboxylate transporter DcuA	434073	435389	-		dcuA_1	similar to AA sequence:UniProtKB:P0ABN5		0	0	0	0	0	0	0
365	PFR_JS15-1_360	Hypothetical protein	435786	436061	-	PROKKA_00365	hypothetical protein	435786	436061	-					0	0	0	0	0	0	0
366	PFR_JS15-1_361	PF07510 family protein	436519	437268	+	PROKKA_00366	hypothetical protein	436519	437268	+					1	0	0	0	0	0	0
367	PFR_JS15-1_362	Hypothetical protein	437358	437600	+	PROKKA_00367	hypothetical protein	437358	437600	+					1	0	0	0	0	0	0
368	PFR_JS15-1_363	Alcohol dehydrogenase	437712	438767	+	PROKKA_00368	Zinc-type alcohol dehydrogenase-like protein	437712	438767	+			similar to AA sequence:UniProtKB:P99173		0	0	0	0	0	0	0
369	PFR_JS15-1_364	Carbamoylphosphate synthase large subunit	438786	440012	+	PROKKA_00369	Carbamoyl-phosphate synthase large chain	438786	440012	+	6.3.5.5	carB_1	similar to AA sequence:UniProtKB:O32771		0	0	0	0	0	0	0
370	PFR_JS15-1_365	Hypothetical protein	440183	440698	+	PROKKA_00370	hypothetical protein	440183	440698	+					1	0	0	0	0	0	0
371	PFR_JS15-1_366	Hypothetical protein	440733	441239	-	PROKKA_00371	hypothetical protein	440733	441239	-					1	0	0	0	0	0	0
																							Crispr_1
372	PFR_JS15-1_367	Hypothetical protein	442095	442208	+											0	0	0	0	0	0		Crispr_1
373	PFR_JS15-1_368	Hypothetical protein	443684	443806	+											0	0	0	0	0	0		Crispr_1
374	PFR_JS15-1_369	Hypothetical protein	443946	444125	+											0	0	0	0	0	0		Crispr_1
375	PFR_JS15-1_370	Hypothetical protein	444165	444356	+											0	0	0	0	0	0		Crispr_1
376	PFR_JS15-1_371	CRISPR-associated endoribonuclease Cas2	444445	444747	-	PROKKA_00372	CRISPR-associated endonuclease Cas2 2	444445	444747	-	3.1.-.-	cas2b	similar to AA sequence:UniProtKB:Q746F4		0	0	0	0	0	0	0		Cas
377	PFR_JS15-1_372	CRISPR-associated endonuclease Cas1	444744	446345	-	PROKKA_00373	CRISPR-associated protein Cas4/endonuclease Cas1 fusion	444744	446345	-	3.1.-.-	cas4-cas1	similar to AA sequence:UniProtKB:Q1CW50		0	0	0	0	0	0	0		Cas
378	PFR_JS15-1_373	Putative CRISPR-associated Csb3 family protein	446335	447336	-	PROKKA_00374	hypothetical protein	446335	447336	-					0	0	0	0	0	0	0		Cas
379	PFR_JS15-1_374	CRISPR-associated helicase Cas3 family protein	447333	449948	-	PROKKA_00375	helicase Cas3	447333	449948	-			protein motif:CLUSTERS:PRK09694		0	0	0	0	0	0	0		Cas
380	PFR_JS15-1_375	Putative CRISPR-associated Csb2 family protein	449945	451486	-	PROKKA_00376	hypothetical protein	449945	451486	-					0	0	0	0	0	0	0		Cas
381	PFR_JS15-1_376	Putative CRISPR-associated Csb1 family protein	451488	452687	-	PROKKA_00377	CRISPR-associated protein (Cas_GSU0053)	451488	452687	-			protein motif:Pfam:PF09617.4		0	0	0	0	0	0	0		Cas
382						PROKKA_00378	tRNA-Ser(gga)	453031	453118	-			COORDINATES:profile:Aragorn:1.2		0					0	0
383	PFR_JS15-1_377	Threonine dehydratase ilvA	453220	454494	+	PROKKA_00379	L-threonine dehydratase biosynthetic IlvA	453220	454494	+	4.3.1.19	ilvA	similar to AA sequence:UniProtKB:P04968		1	0	0	0	0	0	0
384	PFR_JS15-1_378	Hemerythrin HHE cation binding region	454968	455255	+	PROKKA_00380	hypothetical protein	454968	455255	+					1	0	0	0	0	0	0
385	PFR_JS15-1_379	Transcriptional regulator	455261	456271	+	PROKKA_00381	Helix-turn-helix domain protein	455261	456271	+			protein motif:Pfam:PF12840.1		0	0	0	0	0	0	0
386	PFR_JS15-1_380	Hypothetical protein	456319	457623	+	PROKKA_00382	hypothetical protein	456319	457623	+					1	0	0	0	0	0	0
387	PFR_JS15-1_381	Nitrite reductase (NO-forming)	457620	460256	+	PROKKA_00383	Copper-containing nitrite reductase precursor	457620	460256	+	1.7.2.1	aniA	similar to AA sequence:UniProtKB:Q02219		1	0	0	0	0	0	0
388	PFR_JS15-1_382	Putative cell wall anchor domain protein	460410	461789	+	PROKKA_00384	Cna protein B-type domain protein	460410	461789	+			protein motif:Pfam:PF05738.7		1	0	0	0	0	0	0
389	PFR_JS15-1_383	Peptidase C60, sortase A and B	461885	462601	+	PROKKA_00385	Sortase family protein	461885	462601	+			protein motif:Pfam:PF04203.7		0	0	0	0	0	0	0
390	PFR_JS15-1_384	Hypothetical protein	462671	466075	+	PROKKA_00386	DNA polymerase III subunit tau	462671	466075	+	2.7.7.7	dnaX_1	similar to AA sequence:UniProtKB:P06710		0	0	0	0	0	0	0
391	PFR_JS15-1_385	Hypothetical protein	466326	466634	+	PROKKA_00387	Nucleoid-associated protein	466326	466634	+			similar to AA sequence:UniProtKB:A3DHB8		1	0	0	0	0	0	0
392	PFR_JS15-1_386	Recombination protein RecR	466636	467262	+	PROKKA_00388	Recombination protein RecR	466636	467262	+		recR	similar to AA sequence:UniProtKB:Q8RDI4		1	0	0	0	0	0	0
393	PFR_JS15-1_387	Hypothetical protein	467288	468055	-	PROKKA_00389	hypothetical protein	467288	468055	-					0	0	0	0	0	0	0
394	PFR_JS15-1_388	Isoleucine--tRNA ligase (Precursor)	468376	471636	+	PROKKA_00390	Isoleucine--tRNA ligase	468376	471636	+	6.1.1.5	ileS	similar to AA sequence:UniProtKB:P56690		1	0	0	0	0	0	0
395	PFR_JS15-1_389	Oxidoreductase, NAD-binding domain protein	471763	472749	-	PROKKA_00391	1,5-anhydro-D-fructose reductase	471763	472749	-	1.1.1.292	afr_2	similar to AA sequence:UniProtKB:Q2I8V6		1	0	0	0	0	0	0
396	PFR_JS15-1_390	Aspartate kinase	472918	474192	+	PROKKA_00392	Aspartokinase	472918	474192	+	2.7.2.4	ask	similar to AA sequence:UniProtKB:P0A4Z8		1	0	0	0	0	0	0
397	PFR_JS15-1_391	Integral membrane protein MviN	474279	476222	+	PROKKA_00393	putative peptidoglycan biosynthesis protein MviN	474279	476222	+		mviN	similar to AA sequence:UniProtKB:O05435		1	0	0	0	0	0	0
398	PFR_JS15-1_392	Integral membrane lysyl-tRNA synthetase	476286	478349	+	PROKKA_00394	Lysylphosphatidylglycerol biosynthesis bifunctional protein LysX	476286	478349	+		lysX_2	similar to AA sequence:UniProtKB:P94974		1	0	0	0	0	0	0
399	PFR_JS15-1_393	Hypothetical protein	478346	478744	-	PROKKA_00395	hypothetical protein	478346	478744	-					1	0	0	0	0	0	0
400	PFR_JS15-1_394	Fructokinase	478886	479851	-	PROKKA_00396	5-dehydro-2-deoxygluconokinase	478886	479851	-	2.7.1.92	iolC_1	similar to AA sequence:UniProtKB:P42414		1	0	0	0	0	0	0
401	PFR_JS15-1_395	Tat pathway signal sequence	480034	481572	+	PROKKA_00397	Arginine/agmatine antiporter	480034	481572	+		adiC	similar to AA sequence:UniProtKB:P60066		1	0	0	0	0	0	0
402	PFR_JS15-1_396	Protein of hypothetical function DUF894	481668	483449	-	PROKKA_00398	enterobactin exporter EntS	481668	483449	-			protein motif:CLUSTERS:PRK10489		1	0	0	0	0	0	0
403	PFR_JS15-1_397	Hypothetical protein	483634	484077	+	PROKKA_00399	hypothetical protein	483634	484077	+					1	0	0	0	0	0	0
404	PFR_JS15-1_398	Hypothetical protein	484074	484349	+	PROKKA_00400	hypothetical protein	484074	484349	+					0	0	0	0	0	0	0
405	PFR_JS15-1_399	Hypothetical protein	484413	485177	+	PROKKA_00401	hypothetical protein	484413	485177	+					1	0	0	0	0	0	0
406	PFR_JS15-1_400	Hypothetical protein	485226	485942	+	PROKKA_00402	hypothetical protein	485226	485942	+					0	0	0	0	0	0	0
407	PFR_JS15-1_401	YidE/YbjL duplication	486466	488034	-	PROKKA_00403	Aspartate/alanine antiporter	486466	488034	-		aspT	similar to AA sequence:UniProtKB:Q8L3K8		0	0	0	0	0	0	0
408	PFR_JS15-1_402	Phosphoribosylamine--glycine ligase (Precursor)	488295	489548	+	PROKKA_00404	Phosphoribosylamine--glycine ligase	488295	489548	+	6.3.4.13	purD	similar to AA sequence:UniProtKB:Q92RL0		1	0	0	0	0	0	0
409	PFR_JS15-1_403	Adenylosuccinate lyase	489577	491010	+	PROKKA_00405	Adenylosuccinate lyase	489577	491010	+	4.3.2.2	purB	similar to AA sequence:UniProtKB:Q9X0I0		1	0	0	0	0	0	0
410	PFR_JS15-1_404	Hypothetical protein	491020	492126	-	PROKKA_00406	hypothetical protein	491020	492126	-					1	0	0	0	0	0	0
411	PFR_JS15-1_405	Phosphoribosylaminoimidazole-succinocarboxamidesy	492224	493102	+	PROKKA_00407	Phosphoribosylaminoimidazole-succinocarboxamide synthase	492224	493102	+	6.3.2.6	purC	similar to AA sequence:UniProtKB:A0R4I0		1	0	0	0	0	0	0
412	PFR_JS15-1_406	Phosphoribosylformylglycinamidine synthase	493179	493430	+	PROKKA_00408	phosphoribosylformylglycinamidine synthase subunit PurS	493179	493430	+			protein motif:CLUSTERS:PRK05974		1	0	0	0	0	0	0
413	PFR_JS15-1_407	Phosphoribosylformylglycinamidine synthase 1	493432	494109	+	PROKKA_00409	Phosphoribosylformylglycinamidine synthase 1	493432	494109	+	6.3.5.3	purQ	similar to AA sequence:UniProtKB:Q8NMI4		1	0	0	0	0	0	0
414	PFR_JS15-1_408	Hypothetical protein	494188	494886	-	PROKKA_00410	Host cell surface-exposed lipoprotein	494188	494886	-			protein motif:Pfam:PF07553.5		1	0	0	0	0	0	0
415	PFR_JS15-1_409	Polyol permease	495238	496521	+	PROKKA_00411	Alpha-ketoglutarate permease	495238	496521	+		csbX	similar to AA sequence:UniProtKB:O05390		1	0	0	0	0	0	0
416	PFR_JS15-1_410	Hypothetical protein	496607	497542	-	PROKKA_00412	hypothetical protein	496607	497542	-					0	0	0	0	0	0	0
417	PFR_JS15-1_411	Hypothetical protein	497970	498779	+	PROKKA_00413	hypothetical protein	497970	498779	+					0	1	0	1	0	0	0
418	PFR_JS15-1_412	Transposase of ISAar43, IS3 family, IS407 group,	499168	499452	+	PROKKA_00414	Transposase	499168	499452	+			protein motif:Pfam:PF01527.14		0	1	0	1	0	0	0
419	PFR_JS15-1_413	Insertion sequence IS407 OrfB	499503	500318	+	PROKKA_00415	Integrase core domain protein	499503	500318	+			protein motif:Pfam:PF00665.20	99% id to Brevibacterium linens strain SMQ-1335 (mobile element protein)	0	1	0	1	0	0	0
420	PFR_JS15-1_414	Hypothetical protein	500315	500479	+	PROKKA_00416	hypothetical protein	500315	500479	+				Unknown Phage Remnant	0	1	0	1	0	0	0
421	PFR_JS15-1_415	Hypothetical protein	501337	501591	-	PROKKA_00417	hypothetical protein	501337	501591	-				Unknown Phage Remnant	0	1	0	1	0	0	0
								502234	502291					58nt stretch 97% id to Propionibacterium phage E6
422	PFR_JS15-1_416	Phage major capsid protein, HK97 family	502452	503315	-	PROKKA_00418	Phage capsid family protein	502452	503315	-			protein motif:Pfam:PF05065.7	Unknown Phage Remnant	0	1	0	1	0	0	0
423	PFR_JS15-1_417	Hypothetical protein	503511	504212	-	PROKKA_00419	hypothetical protein	503511	504212	-				Unknown Phage Remnant	0	1	0	1	0	0	0
424	PFR_JS15-1_418	Hypothetical protein	504209	504445	-	PROKKA_00420	hypothetical protein	504209	504445	-				Unknown Phage Remnant	0	1	0	1	0	0	0
425	PFR_JS15-1_419	Hypothetical protein	504575	507097	-	PROKKA_00421	hypothetical protein	504575	507097	-			protein motif:Pfam:PF09250.5	Bifunctional DNA primase/polymerase, N-terminal	0	1	0	1	0	0	0
426	PFR_JS15-1_420	Hypothetical protein	507094	507612	-	PROKKA_00422	hypothetical protein	507094	507612	-				Unknown Phage Remnant	0	1	0	1	0	0	0
427	PFR_JS15-1_421	Hypothetical protein	507609	507773	-	PROKKA_00423	hypothetical protein	507609	507773	-				Unknown Phage Remnant	0	1	0	1	0	0	0
428	PFR_JS15-1_422	Hypothetical protein	507770	508009	-	PROKKA_00424	hypothetical protein	507770	508009	-				Unknown Phage Remnant	0	1	0	1	0	0	0
429	PFR_JS15-1_423	Hypothetical protein	508153	508365	-	PROKKA_00425	hypothetical protein	508153	508365	-				Unknown Phage Remnant	0	1	0	1	0	0	0
430	PFR_JS15-1_424	Hypothetical protein	508408	508596	-	PROKKA_00426	Helix-turn-helix domain protein	508408	508596	-			protein motif:Pfam:PF12728.1	Unknown Phage Remnant	0	1	0	1	0	0	0
431	PFR_JS15-1_425	Hypothetical protein	508867	509277	-	PROKKA_00427	hypothetical protein	508867	509277	-				Unknown Phage Remnant	0	0	0	0	0	0	0
432	PFR_JS15-1_426	PhiRv2 phage integrase	509406	510554	-	PROKKA_00428	Putative prophage phiRv2 integrase	509406	510554	-			similar to AA sequence:UniProtKB:P71956	Unknown Phage Remnant	0	0	0	0	0	0	0
433						PROKKA_00429	tRNA-Ser(cag)	510693	510777	-			COORDINATES:profile:Aragorn:1.2		0					0	0
434	PFR_JS15-1_427	Hypothetical protein	510908	511606	+	PROKKA_00430	hypothetical protein	510908	511606	+					1	0	0	0	0	0	0
435	PFR_JS15-1_428	Cutinase	512128	513366	-	PROKKA_00431	Cutinase	512128	513366	-			protein motif:Pfam:PF01083.16	Anchored esterase	1	0	0	0	0	0	0
436	PFR_JS15-1_429	Putative kinase inhibitor protein	513512	513976	-	PROKKA_00432	putative kinase inhibitor protein	513512	513976	-			protein motif:CLUSTERS:PRK10257		0	0	0	0	0	0	0
437	PFR_JS15-1_430	DEAD/DEAH box helicase	514010	516562	-	PROKKA_00433	ski2-like helicase	514010	516562	-			protein motif:CLUSTERS:PRK02362		0	0	0	0	0	0	0
438	PFR_JS15-1_431	2-keto-3-deoxy-6-phosphogluconate aldolase	516699	517397	+	PROKKA_00434	keto-hydroxyglutarate-aldolase/keto-deoxy-phosphogluconate aldolase	516699	517397	+			protein motif:CLUSTERS:PRK07455		1	0	0	0	0	0	0
439	PFR_JS15-1_432	Hypothetical protein	517623	518627	+	PROKKA_00435	putative endopeptidase precursor	517623	518627	+	3.4.-.-		similar to AA sequence:UniProtKB:A4QFQ3		1	0	0	0	0	0	0
440	PFR_JS15-1_433	Glucose-6-phosphate isomerase 2	518819	520501	+	PROKKA_00436	Glucose-6-phosphate isomerase	518819	520501	+	5.3.1.9	pgi	similar to AA sequence:UniProtKB:P64192		1	0	0	0	0	0	0
441	PFR_JS15-1_434	OmpA family membrane associated protein	520505	521290	+	PROKKA_00437	vancomycin high temperature exclusion protein	520505	521290	+			protein motif:CLUSTERS:PRK10834	Putative antibiotic resistance	0	0	0	0	0	0	0
442	PFR_JS15-1_435	UPF0214 protein YfeW	521287	522510	+	PROKKA_00438	Penicillin-binding protein 4*	521287	522510	+		pbpE	similar to AA sequence:UniProtKB:P32959		1	0	0	0	0	0	0
443	PFR_JS15-1_436	FAD linked oxidase protein	522892	525678	+	PROKKA_00439	putative FAD-linked oxidoreductase	522892	525678	+	1.-.-.-		similar to AA sequence:UniProtKB:Q50685		1	0	0	0	0	0	0
444	PFR_JS15-1_437	Acyl-CoA dehydrogenase type 2 domain protein	525837	526985	-	PROKKA_00440	Putative acyl-CoA dehydrogenase YdbM	525837	526985	-	1.3.99.-	ydbM	similar to AA sequence:UniProtKB:P96608		1	0	0	0	0	0	0
445	PFR_JS15-1_438	Carboxylic ester hydrolase	527371	528702	+	PROKKA_00441	Alpha/beta hydrolase family protein	527371	528702	+			protein motif:Pfam:PF12697.1	Secreted esterase	1	0	0	0	0	0	0
446	PFR_JS15-1_439	Hypothetical protein	528699	529199	+	PROKKA_00442	hypothetical protein	528699	529199	+					1	0	0	0	0	0	0
447	PFR_JS15-1_440	ATP-dependent dsDNA exonuclease SbcC	529224	532388	-	PROKKA_00443	Nuclease SbcCD subunit C	529224	532388	-		sbcC	similar to AA sequence:UniProtKB:Q7A5S6		1	0	0	0	0	0	0
448	PFR_JS15-1_441	Nuclease SbcCD, D subunit	532388	533668	-	PROKKA_00444	Nuclease SbcCD subunit D	532388	533668	-		sbcD	similar to AA sequence:UniProtKB:P0AG76		1	0	0	0	0	0	0
449	PFR_JS15-1_442	Adenosine deaminase	533619	534836	-	PROKKA_00445	Aminodeoxyfutalosine deaminase	533619	534836	-	3.5.4.-	add2	similar to AA sequence:UniProtKB:Q82K09		1	0	0	0	0	0	0
450	PFR_JS15-1_443	PAS domain S-box	535019	536818	+	PROKKA_00446	Aerotaxis receptor	535019	536818	+		aer	similar to AA sequence:UniProtKB:P50466		1	0	0	0	0	0	0
451	PFR_JS15-1_444	Hypothetical protein	537056	537427	+	PROKKA_00447	hypothetical protein	537056	537427	+					1	0	0	0	0	0	0
452	PFR_JS15-1_445	Hypothetical protein	537442	538101	-	PROKKA_00448	hypothetical protein	537442	538101	-					0	0	0	0	0	0	0
453	PFR_JS15-1_446	Hypothetical protein	538350	538790	-	PROKKA_00449	hypothetical protein	538350	538790	-					0	0	0	0	0	0	0
454	PFR_JS15-1_447	Pyruvate oxidase	539175	540932	-	PROKKA_00450	Pyruvate oxidase	539175	540932	-	1.2.3.3	pox5	similar to AA sequence:UniProtKB:P37063		1	0	0	0	0	0	0
455	PFR_JS15-1_448	Putative monovalent cation/proton antiporter	541072	543030	-	PROKKA_00451	Sodium, potassium, lithium and rubidium/H(+) antiporter	541072	543030	-		nhaK	similar to AA sequence:UniProtKB:O32212		1	0	0	0	0	0	0
456	PFR_JS15-1_449	Hypothetical protein	543047	543307	+	PROKKA_00452	hypothetical protein	543047	543307	+					0	0	0	0	0	0	0
457	PFR_JS15-1_450	Hypothetical protein	543279	543422	+	PROKKA_00453	hypothetical protein	543279	543422	+					1	0	0	0	0	0	0
458	PFR_JS15-1_451	Transcriptional regulator, MarR family	543575	544024	-	PROKKA_00454	MarR family protein	543575	544024	-			protein motif:Pfam:PF12802.1		1	0	0	0	0	0	0
459	PFR_JS15-1_452	VPDSG-CTERM exosortase interaction domain	544420	545166	+	PROKKA_00455	hypothetical protein	544420	545166	+					0	0	0	0	0	0	0
460	PFR_JS15-1_453	Phosphate transporter family protein	545378	546649	+	PROKKA_00456	Low-affinity inorganic phosphate transporter 1	545378	546649	+		pitA	similar to AA sequence:UniProtKB:P0AFJ7		1	0	0	0	0	0	0
461	PFR_JS15-1_454	Hypothetical protein	546646	546876	+	PROKKA_00457	hypothetical protein	546646	546876	+					1	0	0	0	0	0	0
462	PFR_JS15-1_455	Azoreductase B	547114	547725	+	PROKKA_00458	hypothetical protein	547114	547725	+					1	0	0	0	0	0	0
463	PFR_JS15-1_456	Azoreductase B	547731	548342	+	PROKKA_00459	NAD dependent epimerase/dehydratase family protein	547731	548342	+			protein motif:Pfam:PF01370.15		1	0	0	0	0	0	0
464	PFR_JS15-1_457	Membrane protein, PF10081 family	548395	550254	-	PROKKA_00460	hypothetical protein	548395	550254	-					1	0	0	0	0	0	0
465	PFR_JS15-1_458	Putative ATP-dependent helicase HrpB	550345	552966	-	PROKKA_00461	ATP-dependent RNA helicase HrpB	550345	552966	-	3.6.4.13	hrpB_1	similar to AA sequence:UniProtKB:P37024		1	0	0	0	0	0	0
466	PFR_JS15-1_459	Putative uroporphyrinogen III methyltransferase	553005	553778	-	PROKKA_00462	Siroheme synthase	553005	553778	-		cysG	similar to AA sequence:UniProtKB:P25924	B12 biosynthesis	1	0	0	0	0	0	0
467	PFR_JS15-1_460	Putative ABC transporter ATP-binding protein in	553775	554668	-	PROKKA_00463	Energy-coupling factor transporter ATP-binding protein EcfA3	553775	554668	-	3.6.3.-	ecfA3	similar to AA sequence:UniProtKB:Q0TUN8	B12 biosynthesis	1	0	0	0	0	0	0
468	PFR_JS15-1_461	Cobalt ABC transporter, permease protein CbiQ	554665	555459	-	PROKKA_00464	Cobalt transport protein CbiQ	554665	555459	-		cbiQ	similar to AA sequence:UniProtKB:D5AUZ7	B12 biosynthesis	1	0	0	0	0	0	0
469	PFR_JS15-1_462	Cobalt transport protein CbiN	555463	555963	-	PROKKA_00465	Cobalt transport protein CbiN	555463	555963	-		cbiN	similar to AA sequence:UniProtKB:Q05595	B12 biosynthesis	1	0	0	0	0	0	0
470	PFR_JS15-1_463	Cobalt transport protein CbiM	555956	556663	-	PROKKA_00466	Cobalt transport protein CbiM	555956	556663	-		cbiM	similar to AA sequence:UniProtKB:D5AUZ9	B12 biosynthesis	1	0	0	0	0	0	0
471	PFR_JS15-1_464	GntR domain protein	556973	557737	-	PROKKA_00467	transcriptional regulator NanR	556973	557737	-			protein motif:CLUSTERS:PRK03837		1	0	0	0	0	0	0
472	PFR_JS15-1_465	Hypothetical protein	557942	558070	+	PROKKA_00468	hypothetical protein	557942	558070	+					0	0	0	0	0	0	0
473	PFR_JS15-1_466	Gluconate permease	558086	559429	+	PROKKA_00469	Gnt-II system L-idonate transporter	558086	559429	+		idnT	similar to AA sequence:UniProtKB:P39344		1	0	0	0	0	0	0
474	PFR_JS15-1_467	6-phosphogluconate dehydrogenase, decarboxylating	559556	560446	+	PROKKA_00470	6-phosphogluconate dehydrogenase, NAD(+)-dependent, decarboxylating	559556	560446	+	1.1.1.343	gntZ	similar to AA sequence:UniProtKB:P12013		1	0	0	0	0	0	0
475	PFR_JS15-1_468	Chaperone protein DnaK	560854	562728	+	PROKKA_00471	Chaperone protein DnaK	560854	562728	+		dnaK_1	similar to AA sequence:UniProtKB:Q8NLY6		1	0	0	0	0	0	0
476	PFR_JS15-1_469	Protein GrpE	562893	563543	+	PROKKA_00472	heat shock protein GrpE	562893	563543	+			protein motif:CLUSTERS:PRK10325		1	0	0	0	0	0	0
477	PFR_JS15-1_470	Chaperone protein DnaJ 1	563605	564777	+	PROKKA_00473	Chaperone protein DnaJ	563605	564777	+		dnaJ_1	similar to AA sequence:UniProtKB:P08622		1	0	0	0	0	0	0
478	PFR_JS15-1_471	Transcriptional regulator HspR	564870	565304	+	PROKKA_00474	Putative heat shock protein HspR	564870	565304	+		hspR_1	similar to AA sequence:UniProtKB:P40183		1	0	0	0	0	0	0
479	PFR_JS15-1_472	ATPase BadF/BadG/BcrA/BcrD type	565463	566329	-	PROKKA_00475	BadF/BadG/BcrA/BcrD ATPase family protein	565463	566329	-			protein motif:Pfam:PF01869.14		1	0	0	0	0	0	0
480	PFR_JS15-1_473	Phosphoribosylformylglycinamidine synthase 2	566557	568983	+	PROKKA_00476	Phosphoribosylformylglycinamidine synthase 2	566557	568983	+	6.3.5.3	purL	similar to AA sequence:UniProtKB:A6X1J9		1	0	0	0	0	0	0
481	PFR_JS15-1_474	Peptidase dimerization domain protein	568988	570334	+	PROKKA_00477	Succinyl-diaminopimelate desuccinylase	568988	570334	+	3.5.1.18	dapE_2	similar to AA sequence:UniProtKB:Q9JYL2		0	0	0	0	0	0	0
482	PFR_JS15-1_475	Hypothetical protein	570334	570810	+	PROKKA_00478	hypothetical protein	570334	570810	+					1	0	0	0	0	0	0
483	PFR_JS15-1_476	Formate-tetrahydrofolate ligase	570941	572617	+	PROKKA_00479	Formate--tetrahydrofolate ligase	570941	572617	+	6.3.4.3	fhs	similar to AA sequence:UniProtKB:Q2RM91		1	0	0	0	0	0	0
484	PFR_JS15-1_477	Chloramphenicol phosphotransferase family	572719	573288	-	PROKKA_00480	Chromatin associated protein KTI12	572719	573288	-			protein motif:Pfam:PF08433.4		1	0	0	0	0	0	0
485	PFR_JS15-1_478	UPF0210 protein	573347	574696	-	PROKKA_00481	hypothetical protein	573347	574696	-			protein motif:CLUSTERS:PRK05313		1	0	0	0	0	0	0
486	PFR_JS15-1_479	UPF0237 protein	574700	574969	-	PROKKA_00482	hypothetical protein	574700	574969	-			protein motif:CLUSTERS:PRK00194		1	0	0	0	0	0	0
487	PFR_JS15-1_480	Hypothetical protein	575239	576078	+	PROKKA_00483	hypothetical protein	575239	576078	+					1	0	0	0	0	0	0
488	PFR_JS15-1_481	Amidophosphoribosyltransferase	576179	577720	+	PROKKA_00484	Amidophosphoribosyltransferase precursor	576179	577720	+	2.4.2.14	purF	similar to AA sequence:UniProtKB:P00497		1	0	0	0	0	0	0
489	PFR_JS15-1_482	Phosphoribosylformylglycinamidine cyclo-ligase	577717	578778	+	PROKKA_00485	Phosphoribosylformylglycinamidine cyclo-ligase	577717	578778	+	6.3.3.1	purM	similar to AA sequence:UniProtKB:Q9KPY6		1	0	0	0	0	0	0
490	PFR_JS15-1_483	Hypothetical protein	579012	579242	+	PROKKA_00486	hypothetical protein	579012	579242	+					1	0	0	0	0	0	0
491	PFR_JS15-1_484	Domain family protein, hydrolase, alpha/beta fold	579494	580576	+	PROKKA_00487	Alpha/beta hydrolase family protein	579494	580576	+			protein motif:Pfam:PF12697.1		1	0	0	0	0	0	0
492						PROKKA_00488	tRNA-Phe(gaa)	580747	580821	-			COORDINATES:profile:Aragorn:1.2		0					0	0
493						PROKKA_00489	tRNA-Asp(gtc)	580834	580908	-			COORDINATES:profile:Aragorn:1.2		0					0	0
494						PROKKA_00490	tRNA-Glu(ttc)	581111	581184	-			COORDINATES:profile:Aragorn:1.2		0					0	0
495	PFR_JS15-1_485	Hypothetical protein	581299	583017	-	PROKKA_00491	putative endopeptidase precursor	581299	583017	-	3.4.-.-		similar to AA sequence:UniProtKB:A4QFQ3		0	0	0	0	0	0	0
496	PFR_JS15-1_486	ABC transporter, permease protein	583457	584263	-	PROKKA_00492	ABC-2 type transporter	583457	584263	-			protein motif:Pfam:PF01061.18		1	0	0	0	0	0	0
497	PFR_JS15-1_487	ABC-type multidrug transport system (Fragment)	584260	584847	-	PROKKA_00493	Daunorubicin/doxorubicin resistance ATP-binding protein DrrA	584260	584847	-	3.6.3.-	drrA_1	similar to AA sequence:UniProtKB:P32010		0	0	0	0	0	0	0
498	PFR_JS15-1_488	ABC transporter related	584931	585299	-	PROKKA_00494	Doxorubicin resistance ATP-binding protein DrrA	584931	585299	-	3.6.3.-	drrA_2	similar to AA sequence:UniProtKB:P96205		0	0	0	0	0	0	0
499	PFR_JS15-1_489	Transcriptional regulator	585468	586235	+	PROKKA_00495	HTH-type transcriptional regulator MtrR	585468	586235	+		mtrR	similar to AA sequence:UniProtKB:P39897		1	0	0	0	0	0	0
500						PROKKA_00496	tRNA-Lys(ttt)	586374	586447	+			COORDINATES:profile:Aragorn:1.2		0					0	0
501	PFR_JS15-1_490	Transposase for IS3514a	586729	587934	-	PROKKA_00497	Integrase core domain protein	586729	587934	-			protein motif:Pfam:PF00665.20		0	0	0	0	0	0	0
502	PFR_JS15-1_491	HTH-type transcriptional regulator CmtR	588144	588569	+	PROKKA_00498	HTH-type transcriptional regulator KmtR	588144	588569	+		kmtR	similar to AA sequence:UniProtKB:O53838		1	0	0	0	0	0	0
503	PFR_JS15-1_492	Putative cation transporting P-type ATPase	588566	590437	+											0	0	0	0	0	0
504						PROKKA_00499	tRNA-Ala(agc)	588766	588857	+			COORDINATES:profile:Aragorn:1.2		0					0	0
505	PFR_JS15-1_493	Aspartate/tyrosine/aromatic aminotransferase	590574	591740	-	PROKKA_00500	Putative N-acetyl-LL-diaminopimelate aminotransferase	590574	591740	-	2.6.1.-	patA	similar to AA sequence:UniProtKB:P16524		1	0	0	0	0	0	0
506	PFR_JS15-1_494	Ketopantoate reductase protein	591803	592768	-	PROKKA_00501	2-dehydropantoate 2-reductase	591803	592768	-	1.1.1.169	panE_2	similar to AA sequence:UniProtKB:P0A9J4		0	0	0	0	0	0	0
507	PFR_JS15-1_495	Zinc-binding dehydrogenase family oxidoreductase	592765	593790	-	PROKKA_00502	NADP-dependent isopropanol dehydrogenase	592765	593790	-	1.1.1.80	adh	similar to AA sequence:UniProtKB:P14941		1	0	0	0	0	0	0
508	PFR_JS15-1_496	Hypothetical protein	594108	594461	-	PROKKA_00503	hypothetical protein	594108	594461	-					1	0	0	0	0	0	0
509	PFR_JS15-1_497	Transaldolase	595005	596087	-	PROKKA_00504	Transaldolase	595005	596087	-	2.2.1.2	tal_1	similar to AA sequence:UniProtKB:A0QWX9		1	0	0	0	0	0	0
510	PFR_JS15-1_498	Hypothetical protein	596286	596945	-	PROKKA_00505	hypothetical protein	596286	596945	-					1	0	0	0	0	0	0
511	PFR_JS15-1_499	Hypothetical protein	597066	597413	-	PROKKA_00506	hypothetical protein	597066	597413	-					0	0	0	0	0	0	0
512	PFR_JS15-1_500	Hypothetical protein	597535	598296	-	PROKKA_00507	hypothetical protein	597535	598296	-			protein motif:CLUSTERS:PRK10279		1	0	0	0	0	0	0
513	PFR_JS15-1_501	Hypothetical protein	598293	599105	-	PROKKA_00508	Patatin-like phospholipase	598293	599105	-			protein motif:Pfam:PF01734.1		0	0	0	0	0	0	0
514	PFR_JS15-1_502	Cation diffusion facilitator family transporter	599295	600263	+	PROKKA_00509	Ferrous-iron efflux pump FieF	599295	600263	+		fieF	similar to AA sequence:UniProtKB:P69380		1	0	0	0	0	0	0
515	PFR_JS15-1_503	Cytidine and deoxycytidylate deaminase	600292	600756	+	PROKKA_00510	Riboflavin biosynthesis protein RibD	600292	600756	+		ribD_1	similar to AA sequence:UniProtKB:P25539		1	0	0	0	0	0	0
516	PFR_JS15-1_504	Hypothetical protein	600782	601180	-	PROKKA_00511	PRC-barrel domain protein	600782	601180	-			protein motif:Pfam:PF05239.10		1	0	0	0	0	0	0
517	PFR_JS15-1_505	Membrane efflux protein MFS	601343	601771	-	PROKKA_00512	enterobactin exporter EntS	601343	601771	-			protein motif:CLUSTERS:PRK10489		0	0	0	0	0	0	0
518	PFR_JS15-1_506	Transporter, major facilitator family protein	601805	602629	-	PROKKA_00513	Tetracycline resistance protein, class C	601805	602629	-		tetA	similar to AA sequence:UniProtKB:P02981	Putative antibiotic resistance	1	0	0	0	0	0	0
519	PFR_JS15-1_507	Hypothetical protein	602954	603208	-	PROKKA_00514	hypothetical protein	602954	603208	-					1	0	0	0	0	0	0
520	PFR_JS15-1_508	1,4-dihydroxy-2-naphthoate octaprenyltransferase	603389	604270	+	PROKKA_00515	1,4-dihydroxy-2-naphthoate octaprenyltransferase	603389	604270	+	2.5.1.74	menA	similar to AA sequence:UniProtKB:P32166		1	0	0	0	0	0	0
521	PFR_JS15-1_509	Nuclease, RecB family	604287	606056	-	PROKKA_00516	hypothetical protein	604287	606056	-					1	0	0	0	0	0	0
522	PFR_JS15-1_510	Demethylmenaquinone methyltransferase	606183	606830	-	PROKKA_00517	Ubiquinone/menaquinone biosynthesis C-methyltransferase UbiE	606183	606830	-	2.1.1.163	ubiE_1	similar to AA sequence:UniProtKB:P0A887		1	0	0	0	0	0	0
523	PFR_JS15-1_511	Heme ABC exporter, ATP-binding protein CcmA	607066	607758	+	PROKKA_00518	SkfA peptide export ATP-binding protein SkfE	607066	607758	+	3.6.3.25	skfE	similar to AA sequence:UniProtKB:O31427		1	0	0	0	0	0	0
524	PFR_JS15-1_512	ABC transporter, permease protein	607755	609560	+	PROKKA_00519	hypothetical protein	607755	609560	+					1	0	0	0	0	0	0
525	PFR_JS15-1_513	Chorismate binding enzyme	609606	610844	-	PROKKA_00520	Isochorismate synthase DhbC	609606	610844	-	5.4.4.2	dhbC	similar to AA sequence:UniProtKB:P45744		1	0	0	0	0	0	0
526	PFR_JS15-1_514	Geranylgeranyl reductase family protein	611190	612521	+	PROKKA_00521	Putative oxidoreductase/MT0587	611190	612521	+	1.-.-.-		similar to AA sequence:UniProtKB:O06427		1	0	0	0	0	0	0
527	PFR_JS15-1_515	NADH-quinone oxidoreductase subunit A	612578	612943	+	PROKKA_00522	NAD(P)H-quinone oxidoreductase subunit 3	612578	612943	+	1.6.5.-	ndhC	similar to AA sequence:UniProtKB:P19045		1	0	0	0	0	0	0
528	PFR_JS15-1_516	NADH-quinone oxidoreductase subunit B	612962	613519	+	PROKKA_00523	NADH-quinone oxidoreductase subunit 6	612962	613519	+	1.6.99.5	nqo6	similar to AA sequence:UniProtKB:Q56218		1	0	0	0	0	0	0
529	PFR_JS15-1_517	NADH-quinone oxidoreductase subunit C	613516	614283	+	PROKKA_00524	NADH-quinone oxidoreductase subunit C 1	613516	614283	+	1.6.99.5	nuoC1	similar to AA sequence:UniProtKB:O68854		1	0	0	0	0	0	0
530	PFR_JS15-1_518	NADH-quinone oxidoreductase subunit D	614280	615653	+	PROKKA_00525	NADH-quinone oxidoreductase subunit 4	614280	615653	+	1.6.99.5	nqo4	similar to AA sequence:UniProtKB:Q56220		1	0	0	0	0	0	0
531	PFR_JS15-1_519	NADH dehydrogenase subunit E	615709	616440	+	PROKKA_00526	NADH-quinone oxidoreductase subunit E	615709	616440	+	1.6.99.5	nuoE	similar to AA sequence:UniProtKB:P65573		1	0	0	0	0	0	0
532	PFR_JS15-1_520	NADH oxidoreductase, F subunit	616437	617777	+	PROKKA_00527	NADH-quinone oxidoreductase subunit 1	616437	617777	+	1.6.99.5	nqo1	similar to AA sequence:UniProtKB:Q56222		1	0	0	0	0	0	0
533	PFR_JS15-1_521	NADH dehydrogenase, G subunit	617774	620185	+	PROKKA_00528	NADH-quinone oxidoreductase chain 3	617774	620185	+	1.6.99.5	nqo3	similar to AA sequence:UniProtKB:P29915		1	0	0	0	0	0	0
534	PFR_JS15-1_522	NADH-quinone oxidoreductase subunit H	620182	621552	+	PROKKA_00529	NADH-quinone oxidoreductase subunit H	620182	621552	+	1.6.99.5	nuoH	similar to AA sequence:UniProtKB:P42032		1	0	0	0	0	0	0
535	PFR_JS15-1_523	NADH-quinone oxidoreductase subunit I	621553	622125	+	PROKKA_00530	NADH-quinone oxidoreductase subunit 9	621553	622125	+	1.6.99.5	nqo9	similar to AA sequence:UniProtKB:Q56224		1	0	0	0	0	0	0
536	PFR_JS15-1_524	NADH-ubiquinone/plastoquinone oxidoreductase	622122	622991	+	PROKKA_00531	NADH-quinone oxidoreductase subunit J	622122	622991	+	1.6.99.5	nuoJ	similar to AA sequence:UniProtKB:P0AFE0		1	0	0	0	0	0	0
537	PFR_JS15-1_525	NADH-quinone oxidoreductase subunit K	622988	623287	+	PROKKA_00532	NADH-quinone oxidoreductase subunit 11	622988	623287	+	1.6.99.5		similar to AA sequence:UniProtKB:Q56226		1	0	0	0	0	0	0
538	PFR_JS15-1_526	NADH dehydrogenase subunit L	623298	625205	+	PROKKA_00533	NADH-quinone oxidoreductase subunit 12	623298	625205	+	1.6.99.5		similar to AA sequence:UniProtKB:Q56227		1	0	0	0	0	0	0
539	PFR_JS15-1_527	NADH dehydrogenase subunit M	625220	626761	+	PROKKA_00534	NADH-quinone oxidoreductase subunit M	625220	626761	+	1.6.99.5	nuoM	similar to AA sequence:UniProtKB:P0AFE8		1	0	0	0	0	0	0
540	PFR_JS15-1_528	NADH-quinone oxidoreductase subunit N	626765	628321	+	PROKKA_00535	NADH-quinone oxidoreductase subunit N	626765	628321	+	1.6.99.5	nuoN	similar to AA sequence:UniProtKB:P0AFF0		1	0	0	0	0	0	0
541	PFR_JS15-1_529	Polyprenyl synthetase	628335	629312	+	PROKKA_00536	Heptaprenyl diphosphate synthase component 2	628335	629312	+	2.5.1.30	hepT	similar to AA sequence:UniProtKB:P31114		1	0	0	0	0	0	0
542	PFR_JS15-1_530	Inner membrane protein YhaI	629442	629897	-	PROKKA_00537	Inner membrane protein YhaH	629442	629897	-		yhaH	similar to AA sequence:UniProtKB:P64590		1	0	0	0	0	0	0
543	PFR_JS15-1_531	Hypothetical protein	629970	631175	-	PROKKA_00538	Inner membrane protein YhaI	629970	631175	-		yhaI	similar to AA sequence:UniProtKB:P64592		1	0	0	0	0	0	0
544	PFR_JS15-1_532	Peptidase family M13	631263	633236	-	PROKKA_00539	Neutral endopeptidase	631263	633236	-	3.4.24.-	pepO	similar to AA sequence:UniProtKB:Q07744		1	0	0	0	0	0	0
545	PFR_JS15-1_533	2-oxoglutarate ferredoxin oxidoreductase subunit	633366	634445	-	PROKKA_00540	2-oxoglutarate oxidoreductase subunit KorB	633366	634445	-	1.2.-.-	korB	similar to AA sequence:UniProtKB:O53181		1	0	0	0	0	0	0
546	PFR_JS15-1_534	Ferredoxin oxidoreductase, alpha subunit	634442	636331	-	PROKKA_00541	2-oxoglutarate oxidoreductase subunit KorA	634442	636331	-	1.2.-.-	korA	similar to AA sequence:UniProtKB:O53182		1	0	0	0	0	0	0
547	PFR_JS15-1_535	Mannosyltransferase MptA	636503	638092	+	PROKKA_00542	hypothetical protein	636503	638092	+					1	0	0	0	0	0	0
548	PFR_JS15-1_536	Hypothetical protein	638259	638645	+	PROKKA_00543	hypothetical protein	638259	638645	+					1	0	0	0	0	0	0
549	PFR_JS15-1_537	Exodeoxyribonuclease	638704	639645	-	PROKKA_00544	Exodeoxyribonuclease	638704	639645	-	3.1.11.2	exoA	similar to AA sequence:UniProtKB:P37454		1	0	0	0	0	0	0
550	PFR_JS15-1_538	Hypothetical protein	639724	640218	+	PROKKA_00545	hypothetical protein	639724	640218	+					1	0	0	0	0	0	0
551						PROKKA_00546	tRNA-Tyr(gta)	640316	640399	+			COORDINATES:profile:Aragorn:1.2		0					0	0
552	PFR_JS15-1_539	Alkyl hydroperoxide reductase, C22 subunit,	640742	641305	+	PROKKA_00547	Alkyl hydroperoxide reductase subunit C	640742	641305	+	1.11.1.15	ahpC	similar to AA sequence:UniProtKB:P80239		1	0	0	0	0	0	0
553	PFR_JS15-1_540	Alkyl hydroperoxide reductase, F subunit	641529	643184	+	PROKKA_00548	NADH dehydrogenase	641529	643184	+	1.6.99.3	ahpF	similar to AA sequence:UniProtKB:P26829		1	0	0	0	0	0	0
554						PROKKA_00549	tRNA-Thr(ggt)	643229	643302	+			COORDINATES:profile:Aragorn:1.2		0					0	0
555						PROKKA_00550	tRNA-Met(cat)	643380	643454	+			COORDINATES:profile:Aragorn:1.2		0					0	0
556	PFR_JS15-1_541	50S ribosomal protein L33	643583	643753	+	PROKKA_00551	50S ribosomal protein L33 1	643583	643753	+		rpmGA	similar to AA sequence:UniProtKB:P23375		1	0	0	0	0	0	0
557	PFR_JS15-1_542	UPF0336 protein	643901	644335	+	PROKKA_00552	hypothetical protein	643901	644335	+					1	0	0	0	0	0	0
558	PFR_JS15-1_543	MaoC-like protein	644332	644763	+	PROKKA_00553	MaoC like domain protein	644332	644763	+			protein motif:Pfam:PF01575.13		1	0	0	0	0	0	0
559	PFR_JS15-1_544	UDP-N-acetylenolpyruvoylglucosamine reductase	644833	645966	+	PROKKA_00554	UDP-N-acetylenolpyruvoylglucosamine reductase	644833	645966	+	1.3.1.98	murB	similar to AA sequence:UniProtKB:Q9HZM7		1	0	0	0	0	0	0
560	PFR_JS15-1_545	Hypothetical protein	645988	647472	+	PROKKA_00555	hypothetical protein	645988	647472	+					1	0	0	0	0	0	0
561						PROKKA_00556	tRNA-Trp(cca)	647663	647736	+			COORDINATES:profile:Aragorn:1.2		0					0	0
562	PFR_JS15-1_546	Putative SecE/Sec61-gamma subunit of protein	647905	648492	+	PROKKA_00557	preprotein translocase subunit SecE	647905	648492	+			protein motif:CLUSTERS:PRK07597		1	0	0	0	0	0	0
563	PFR_JS15-1_547	Transcription antitermination protein nusG	648512	649399	+	PROKKA_00558	hypothetical protein	648512	649399	+			similar to AA sequence:UniProtKB:P27309	Transcription termination/antitermination protein NusG	1	0	0	0	0	0	0
564	PFR_JS15-1_548	50S ribosomal protein L11	649509	649937	+	PROKKA_00559	50S ribosomal protein L11	649509	649937	+		rplK	similar to AA sequence:UniProtKB:A0QS45		1	0	0	0	0	0	0
565	PFR_JS15-1_549	50S ribosomal protein L1	650059	650769	+	PROKKA_00560	50S ribosomal protein L1	650059	650769	+		rplA	similar to AA sequence:UniProtKB:A0QS46		1	0	0	0	0	0	0
566	PFR_JS15-1_550	Octanoyltransferase	650936	651808	+	PROKKA_00561	Octanoyltransferase	650936	651808	+	2.3.1.181	lipB	similar to AA sequence:UniProtKB:Q10404		1	0	0	0	0	0	0
567	PFR_JS15-1_551	Lipoyl synthase	651805	652755	+	PROKKA_00562	Lipoyl synthase	651805	652755	+	2.8.1.8	lipA	similar to AA sequence:UniProtKB:A8I4L8		1	0	0	0	0	0	0
																							PossibleCrispr_2
568	PFR_JS15-1_552	Transposase IS6110	652945	653832	-	PROKKA_00563	Integrase core domain protein	652945	653832	-			protein motif:Pfam:PF00665.20		0	0	0	0	0	0	0
569	PFR_JS15-1_553	IS3 family element	653865	654209	-	PROKKA_00564	Transposase	653865	654209	-			protein motif:Pfam:PF01527.14		0	0	0	0	0	0	0
570	PFR_JS15-1_554	50S ribosomal protein L10	654512	655159	+	PROKKA_00565	50S ribosomal protein L10	654512	655159	+		rplJ	similar to AA sequence:UniProtKB:A0QS62		1	0	0	0	0	0	0
571	PFR_JS15-1_555	LSU ribosomal protein L7/L12 (P1/P2)	655176	655571	+	PROKKA_00566	50S ribosomal protein L7/L12	655176	655571	+		rplL	similar to AA sequence:UniProtKB:Q8NT28		1	0	0	0	0	0	0
572	PFR_JS15-1_556	Hypothetical protein	655842	656468	+	PROKKA_00567	hypothetical protein	655842	656468	+					1	0	0	0	0	0	0
573	PFR_JS15-1_557	DNA-directed RNA polymerase, beta subunit	656794	660270	+	PROKKA_00568	DNA-directed RNA polymerase subunit beta	656794	660270	+	2.7.7.6	rpoB	similar to AA sequence:UniProtKB:Q9L0L0		1	0	0	0	0	0	0
574	PFR_JS15-1_558	DNA-directed RNA polymerase, beta' subunit	660372	664262	+	PROKKA_00569	DNA-directed RNA polymerase subunit beta'	660372	664262	+	2.7.7.6	rpoC	similar to AA sequence:UniProtKB:A0QS66		1	0	0	0	0	0	0
575	PFR_JS15-1_559	30S ribosomal protein S12	664722	665093	+	PROKKA_00570	30S ribosomal protein S12	664722	665093	+		rpsL	similar to AA sequence:UniProtKB:P0A4A5		1	0	0	0	0	0	0
576	PFR_JS15-1_560	30S ribosomal protein S7	665093	665563	+	PROKKA_00571	30S ribosomal protein S7	665093	665563	+		rpsG	similar to AA sequence:UniProtKB:A0QS97		1	0	0	0	0	0	0
577	PFR_JS15-1_561	Translation elongation factor G	665734	667833	+	PROKKA_00572	Elongation factor G	665734	667833	+		fusA	similar to AA sequence:UniProtKB:P0A556		1	0	0	0	0	0	0
578	PFR_JS15-1_562	Translation elongation factor Tu	668068	669258	+	PROKKA_00573	Elongation factor Tu	668068	669258	+		tuf	similar to AA sequence:UniProtKB:A0QS98		1	0	0	0	0	0	0
579	PFR_JS15-1_563	Membrane protein, PF09852 family	669452	670882	-	PROKKA_00574	hypothetical protein	669452	670882	-					1	0	0	0	0	0	0
580	PFR_JS15-1_564	Acetyltransferase, gnlAT family	670924	671613	+	PROKKA_00575	Acetyltransferase (GNAT) family protein	670924	671613	+			protein motif:Pfam:PF00583.18		1	0	0	0	0	0	0
581	PFR_JS15-1_565	Glutamate--tRNA ligase (Precursor)	671839	673233	+	PROKKA_00576	Glutamate--tRNA ligase	671839	673233	+	6.1.1.17	gltX	similar to AA sequence:UniProtKB:P27000		1	0	0	0	0	0	0
582	PFR_JS15-1_566	Putative insertion element ISCmi2 transposase	673230	674225	-	PROKKA_00577	Integrase core domain protein	673230	674225	-			protein motif:Pfam:PF00665.20		0	0	0	0	0	0	0
583	PFR_JS15-1_567	Aminotransferase, class IV	674375	675247	+	PROKKA_00578	Branched-chain-amino-acid aminotransferase	674375	675247	+	2.6.1.42	ilvE_1	similar to AA sequence:UniProtKB:O86428		0	0	0	0	0	0	0
584	PFR_JS15-1_568	30S ribosomal protein S10	675682	675993	+	PROKKA_00579	30S ribosomal protein S10	675682	675993	+		rpsJ	similar to AA sequence:UniProtKB:A0QSD0		1	0	0	0	0	0	0
585	PFR_JS15-1_569	50S ribosomal protein L3	676005	676664	+	PROKKA_00580	50S ribosomal protein L3	676005	676664	+		rplC	similar to AA sequence:UniProtKB:A0QSD1		1	0	0	0	0	0	0
586	PFR_JS15-1_570	50S ribosomal protein L4	676661	677362	+	PROKKA_00581	50S ribosomal protein L4	676661	677362	+		rplD	similar to AA sequence:UniProtKB:A0QSD2		1	0	0	0	0	0	0
587	PFR_JS15-1_571	50S ribosomal protein L23	677359	677670	+	PROKKA_00582	50S ribosomal protein L23	677359	677670	+		rplW	similar to AA sequence:UniProtKB:A0QSD3		1	0	0	0	0	0	0
588	PFR_JS15-1_572	50S ribosomal protein L2	677709	678545	+	PROKKA_00583	50S ribosomal protein L2	677709	678545	+		rplB	similar to AA sequence:UniProtKB:A0QSD4		1	0	0	0	0	0	0
589	PFR_JS15-1_573	30S ribosomal protein S19	678563	678844	+	PROKKA_00584	30S ribosomal protein S19	678563	678844	+		rpsS	similar to AA sequence:UniProtKB:P0A5X5		1	0	0	0	0	0	0
590	PFR_JS15-1_574	50S ribosomal protein L22	678870	679355	+	PROKKA_00585	50S ribosomal protein L22	678870	679355	+		rplV	similar to AA sequence:UniProtKB:A0QSD6		1	0	0	0	0	0	0
591	PFR_JS15-1_575	30S ribosomal protein S3	679358	680176	+	PROKKA_00586	30S ribosomal protein S3	679358	680176	+		rpsC	similar to AA sequence:UniProtKB:P23309		1	0	0	0	0	0	0
592	PFR_JS15-1_576	50S ribosomal protein L16	680182	680601	+	PROKKA_00587	50S ribosomal protein L16	680182	680601	+		rplP	similar to AA sequence:UniProtKB:A0QSD8		1	0	0	0	0	0	0
593	PFR_JS15-1_577	50S ribosomal protein L29	680603	680851	+	PROKKA_00588	50S ribosomal protein L29	680603	680851	+		rpmC	similar to AA sequence:UniProtKB:P95057		1	0	0	0	0	0	0
594	PFR_JS15-1_578	30S ribosomal protein S17	680848	681123	+	PROKKA_00589	30S ribosomal protein S17	680848	681123	+		rpsQ	similar to AA sequence:UniProtKB:A0QSE0		1	0	0	0	0	0	0
595	PFR_JS15-1_579	50S ribosomal protein L14	681254	681625	+	PROKKA_00590	50S ribosomal protein L14	681254	681625	+		rplN	similar to AA sequence:UniProtKB:A0QSF9		1	0	0	0	0	0	0
596	PFR_JS15-1_580	50S ribosomal protein L24	681627	681998	+	PROKKA_00591	50S ribosomal protein L24	681627	681998	+		rplX	similar to AA sequence:UniProtKB:P60735		1	0	0	0	0	0	0
597	PFR_JS15-1_581	50S ribosomal protein L5	681998	682660	+	PROKKA_00592	50S ribosomal protein L5	681998	682660	+		rplE	similar to AA sequence:UniProtKB:A0QSG1		1	0	0	0	0	0	0
598	PFR_JS15-1_582	30S ribosomal protein S14 type Z	682669	682854	+	PROKKA_00593	30S ribosomal protein S14 type Z	682669	682854	+		rpsZ	similar to AA sequence:UniProtKB:P54798		1	0	0	0	0	0	0
599	PFR_JS15-1_583	30S ribosomal protein S8	683014	683421	+	PROKKA_00594	30S ribosomal protein S8	683014	683421	+		rpsH	similar to AA sequence:UniProtKB:A0QSG3		1	0	0	0	0	0	0
600	PFR_JS15-1_584	50S ribosomal protein L6	683452	683994	+	PROKKA_00595	50S ribosomal protein L6	683452	683994	+		rplF	similar to AA sequence:UniProtKB:A0QSG4		1	0	0	0	0	0	0
601	PFR_JS15-1_585	50S ribosomal protein L18	683997	684380	+	PROKKA_00596	50S ribosomal protein L18	683997	684380	+		rplR	similar to AA sequence:UniProtKB:P46899		1	0	0	0	0	0	0
602	PFR_JS15-1_586	30S ribosomal protein S5	684403	685014	+	PROKKA_00597	30S ribosomal protein S5	684403	685014	+		rpsE	similar to AA sequence:UniProtKB:Q6A6P3		1	0	0	0	0	0	0
603	PFR_JS15-1_587	50S ribosomal protein L30	685014	685196	+	PROKKA_00598	50S ribosomal protein L30	685014	685196	+		rpmD	similar to AA sequence:UniProtKB:P0AG51		1	0	0	0	0	0	0
604	PFR_JS15-1_588	50S ribosomal protein L15	685198	685641	+	PROKKA_00599	50S ribosomal protein L15	685198	685641	+		rplO	similar to AA sequence:UniProtKB:P19946		1	0	0	0	0	0	0
605	PFR_JS15-1_589	FMN reductase	685998	686645	-	PROKKA_00600	NAD(P)H-dependent FAD/FMN reductase	685998	686645	-	1.5.1.45		similar to AA sequence:UniProtKB:A4IT49		1	0	0	0	0	0	0
606	PFR_JS15-1_590	Putative luciferase-like monooxygenase,	686756	687952	-	PROKKA_00601	hypothetical protein	686756	687952	-			protein motif:CLUSTERS:PRK10508		1	0	0	0	0	0	0
607	PFR_JS15-1_591	Oligopeptide-binding protein OppA	688203	689921	-	PROKKA_00602	putative monoacyl phosphatidylinositol tetramannoside-binding protein LpqW precursor	688203	689921	-			similar to AA sequence:UniProtKB:A0R2I8		0	0	0	0	0	0	0
608	PFR_JS15-1_592	Oligopeptide transport ATP-binding protein	689992	692091	-	PROKKA_00603	Glutathione import ATP-binding protein GsiA	689992	692091	-	3.6.3.-	gsiA_1	similar to AA sequence:UniProtKB:P75796		1	0	0	0	0	0	0
609	PFR_JS15-1_593	Oligopeptide transport system permease protein	692088	693074	-	PROKKA_00604	Oligopeptide transport system permease protein OppC	692088	693074	-		oppC	similar to AA sequence:UniProtKB:P08006		1	0	0	0	0	0	0
610	PFR_JS15-1_594	Dipeptide/oligopeptide ABC superfamily ATP	693076	694149	-	PROKKA_00605	Dipeptide transport system permease protein DppB	693076	694149	-		dppB	similar to AA sequence:UniProtKB:P0AEF8		0	0	0	0	0	0	0
611	PFR_JS15-1_595	Protein translocase subunit SecY	694449	695762	+	PROKKA_00606	preprotein translocase subunit SecY	694449	695762	+			protein motif:CLUSTERS:PRK09204		1	0	0	0	0	0	0
612	PFR_JS15-1_596	Adenylate kinase	695774	696334	+	PROKKA_00607	Adenylate kinase	695774	696334	+	2.7.4.3	adk	similar to AA sequence:UniProtKB:A0QSH8		1	0	0	0	0	0	0
613	PFR_JS15-1_597	Methionyl aminopeptidase	696346	697176	+	PROKKA_00608	Methionine aminopeptidase 1	696346	697176	+	3.4.11.18	map_1	similar to AA sequence:UniProtKB:P19994		1	0	0	0	0	0	0
614	PFR_JS15-1_598	Hypothetical protein	697202	697588	+	PROKKA_00609	hypothetical protein	697202	697588	+					1	0	0	0	0	0	0
615	PFR_JS15-1_599	Hypothetical protein	697619	697903	-	PROKKA_00610	YciI-like protein	697619	697903	-			protein motif:CLUSTERS:PRK12863		1	0	0	0	0	0	0
616	PFR_JS15-1_600	Translation initiation factor IF-1	698262	698483	+	PROKKA_00611	Translation initiation factor IF-1	698262	698483	+		infA	similar to AA sequence:UniProtKB:P0A5H5		1	0	0	0	0	0	0
617	PFR_JS15-1_601	Hypothetical protein	698576	698689	+	PROKKA_00612	50S ribosomal protein L36	698576	698689	+		rpmJ	similar to AA sequence:UniProtKB:P07841		0	0	0	0	0	0	0
618	PFR_JS15-1_602	30S ribosomal protein S13	698942	699316	+	PROKKA_00613	30S ribosomal protein S13	698942	699316	+		rpsM	similar to AA sequence:UniProtKB:A0QSL5		1	0	0	0	0	0	0
619	PFR_JS15-1_603	30S ribosomal protein S11	699362	699769	+	PROKKA_00614	30S ribosomal protein S11	699362	699769	+		rpsK	similar to AA sequence:UniProtKB:P66357		1	0	0	0	0	0	0
620	PFR_JS15-1_604	30S ribosomal protein S4	699800	700405	+	PROKKA_00615	30S ribosomal protein S4	699800	700405	+		rpsD	similar to AA sequence:UniProtKB:A0QSL7		1	0	0	0	0	0	0
621	PFR_JS15-1_605	DNA-directed RNA polymerase, alpha subunit	700530	701549	+	PROKKA_00616	DNA-directed RNA polymerase subunit alpha	700530	701549	+	2.7.7.6	rpoA	similar to AA sequence:UniProtKB:P66701		1	0	0	0	0	0	0
622	PFR_JS15-1_606	50S ribosomal protein L17	701593	702180	+	PROKKA_00617	50S ribosomal protein L17	701593	702180	+		rplQ	similar to AA sequence:UniProtKB:A0QSL9		1	0	0	0	0	0	0
623	PFR_JS15-1_607	Glycosyltransferase, group 1 family	702221	703462	+	PROKKA_00618	GDP-mannose-dependent alpha-(1-6)-phosphatidylinositol dimannoside mannosyltransferase	702221	703462	+	2.4.1.57	pimC	similar to AA sequence:UniProtKB:P0CF99		1	0	0	0	0	0	0
624	PFR_JS15-1_608	Resuscitation-promoting factor RpfB	703558	704643	-	PROKKA_00619	Resuscitation-promoting factor Rpf2 precursor	703558	704643	-	3.-.-.-	rpf2	similar to AA sequence:UniProtKB:Q6M6N7		1	0	0	0	0	0	0
625	PFR_JS15-1_609	Superoxide dismutase	704937	705545	-	PROKKA_00620	Superoxide dismutase [Mn/Fe]	704937	705545	-	1.15.1.1	sodA	similar to AA sequence:UniProtKB:P80293		1	0	0	0	0	0	0
626	PFR_JS15-1_610	ABC transporter domain-containing ATP-binding	705744	706784	+	PROKKA_00621	putative ABC transporter ATP-binding protein YxlF	705744	706784	+	3.6.3.-	yxlF_1	similar to AA sequence:UniProtKB:P94374		1	0	0	0	0	0	0
627	PFR_JS15-1_611	Putative integral membrane transport protein	706754	708346	+	PROKKA_00622	hypothetical protein	706754	708346	+					1	0	0	0	0	0	0
628	PFR_JS15-1_612	Substrate-specific component CbrT of predicted	708361	709212	-	PROKKA_00623	hypothetical protein	708361	709212	-					1	0	0	0	0	0	0
629	PFR_JS15-1_613	ABC transporter	709209	710825	-	PROKKA_00624	Putative HMP/thiamine import ATP-binding protein YkoD	709209	710825	-	3.6.3.-	ykoD_1	similar to AA sequence:UniProtKB:O34362		1	0	0	0	0	0	0
630	PFR_JS15-1_614	Cobalt transport protein	710822	711922	-	PROKKA_00625	Energy-coupling factor transporter transmembrane protein EcfT	710822	711922	-		ecfT	similar to AA sequence:UniProtKB:Q03ZL4		1	0	0	0	0	0	0
631	PFR_JS15-1_615	Hypothetical protein	711968	712519	-	PROKKA_00626	hypothetical protein	711968	712519	-					1	0	0	0	0	0	0
632	PFR_JS15-1_616	Methyltransferase small domain protein	712829	713428	-	PROKKA_00627	Ribosomal RNA small subunit methyltransferase C	712829	713428	-	2.1.1.172	rsmC_1	similar to AA sequence:UniProtKB:P39406		1	0	0	0	0	0	0
633	PFR_JS15-1_617	TRNA pseudouridine synthase A	713466	714344	-	PROKKA_00628	tRNA pseudouridine synthase A	713466	714344	-	5.4.99.12	truA	similar to AA sequence:UniProtKB:P07649		1	0	0	0	0	0	0
634	PFR_JS15-1_618	TRNA (guanine-N(7)-)-methyltransferase	714337	715191	-	PROKKA_00629	tRNA (guanine-N(7)-)-methyltransferase	714337	715191	-	2.1.1.33	trmB	similar to AA sequence:UniProtKB:P44648		1	0	0	0	0	0	0
635	PFR_JS15-1_619	PF03733 domain protein	715404	715799	+	PROKKA_00630	Inner membrane protein YccF	715404	715799	+		yccF	similar to AA sequence:UniProtKB:P0AB12		1	0	0	0	0	0	0
636	PFR_JS15-1_620	Elongation factor G fusA2	715931	718027	-	PROKKA_00631	Elongation factor G	715931	718027	-		fus	similar to AA sequence:UniProtKB:Q5XDW4		1	0	0	0	0	0	0
637	PFR_JS15-1_621	50S ribosomal protein L13	718328	718771	+	PROKKA_00632	50S ribosomal protein L13	718328	718771	+		rplM	similar to AA sequence:UniProtKB:A0QSP8		1	0	0	0	0	0	0
638	PFR_JS15-1_622	30S ribosomal protein S9	718768	719319	+	PROKKA_00633	30S ribosomal protein S9	718768	719319	+		rpsI	similar to AA sequence:UniProtKB:A0QSP9		1	0	0	0	0	0	0
639	PFR_JS15-1_623	Phosphoglucosamine mutase	719470	720813	+	PROKKA_00634	Phosphoglucosamine mutase	719470	720813	+	5.4.2.10	glmM	similar to AA sequence:UniProtKB:P99087		1	0	0	0	0	0	0
640	PFR_JS15-1_624	Pantothenate kinase	720952	722034	-	PROKKA_00635	Pantothenate kinase	720952	722034	-	2.7.1.33	coaA_2	similar to AA sequence:UniProtKB:P63810		1	0	0	0	0	0	0
641	PFR_JS15-1_625	Glucosamine--fructose-6-phosphate	722183	724033	+	PROKKA_00636	Glutamine--fructose-6-phosphate aminotransferase [isomerizing]	722183	724033	+	2.6.1.16	glmS	similar to AA sequence:UniProtKB:P17169		1	0	0	0	0	0	0
642	PFR_JS15-1_626	Holo-[acyl-carrier-protein] synthase AcpS	724074	724541	+	PROKKA_00637	Holo-[acyl-carrier-protein] synthase	724074	724541	+	2.7.8.7	acpS	similar to AA sequence:UniProtKB:O86785		0	0	0	0	0	0	0
643	PFR_JS15-1_627	YjeF protein	724543	725961	+	PROKKA_00638	Bifunctional NAD(P)H-hydrate repair enzyme Nnr	724543	725961	+		nnr	similar to AA sequence:UniProtKB:P31806		1	0	0	0	0	0	0
644	PFR_JS15-1_628	Glycosyltransferase, group 1 family	725990	727135	-	PROKKA_00639	GDP-mannose-dependent alpha-mannosyltransferase	725990	727135	-	2.4.1.-	mgtA_2	similar to AA sequence:UniProtKB:O06423		1	0	0	0	0	0	0
645	PFR_JS15-1_629	Hypothetical protein	727413	730544	+	PROKKA_00640	ATP-dependent RNA helicase DeaD	727413	730544	+	3.6.4.13	deaD	similar to AA sequence:UniProtKB:P0A9P6		1	0	0	0	0	0	0
646	PFR_JS15-1_630	Putative ATPase or kinase	730807	731802	+	PROKKA_00641	tRNA threonylcarbamoyladenosine biosynthesis protein TsaE	730807	731802	+		tsaE	similar to AA sequence:UniProtKB:O05515		1	0	0	0	0	0	0
647	PFR_JS15-1_631	Universal bacterial protein YeaZ	731799	732485	+	PROKKA_00642	tRNA threonylcarbamoyladenosine biosynthesis protein TsaB	731799	732485	+		tsaB	similar to AA sequence:UniProtKB:Q7CQE0		1	0	0	0	0	0	0
648	PFR_JS15-1_632	Hypothetical protein	732482	733003	+	PROKKA_00643	ribosomal-protein-alanine N-acetyltransferase	732482	733003	+			protein motif:CLUSTERS:PRK09491		1	0	0	0	0	0	0
649	PFR_JS15-1_633	Probable tRNA threonylcarbamoyladenosine	733000	734073	+	PROKKA_00644	tRNA N6-adenosine threonylcarbamoyltransferase	733000	734073	+	2.3.1.-	tsaD	similar to AA sequence:UniProtKB:Q2FWL2		1	0	0	0	0	0	0
650	PFR_JS15-1_634	Nicotinate-nucleotide--dimethylbenzimidazole	734147	736027	+	PROKKA_00645	5,6-dimethylbenzimidazole synthase	734147	736027	+	1.14.99.40	bluB	similar to AA sequence:UniProtKB:Q92PC8		1	0	0	0	0	0	0
651	PFR_JS15-1_635	Aminopeptidase C	736211	737659	+	PROKKA_00646	Aminopeptidase C	736211	737659	+	3.4.22.40	pepC_1	similar to AA sequence:UniProtKB:Q04723		1	0	0	0	0	0	0
652	PFR_JS15-1_636	Hydrolase, NUDIX family	737714	738199	+	PROKKA_00647	8-oxo-dGTP diphosphatase	737714	738199	+	3.6.1.55	mutX	similar to AA sequence:UniProtKB:P41354		1	0	0	0	0	0	0
653	PFR_JS15-1_637	MFS transporter	738343	739638	+	PROKKA_00648	enterobactin exporter EntS	738343	739638	+			protein motif:CLUSTERS:PRK10489		1	0	0	0	0	0	0
654	PFR_JS15-1_638	RNA cap guanine-N2 methyltransferase	739663	741033	+	PROKKA_00649	Methyltransferase domain protein	739663	741033	+			protein motif:Pfam:PF12847.1		0	0	0	0	0	0	0
655	PFR_JS15-1_639	ABC transporter, permease protein OpuCB	741245	741886	+	PROKKA_00650	Choline transport system permease protein OpuBB	741245	741886	+		opuBB	similar to AA sequence:UniProtKB:Q45461		1	0	0	0	0	0	0
656	PFR_JS15-1_640	Osmoprotectant transport ATP-binding protein ABC	741883	743217	+	PROKKA_00651	Choline transport ATP-binding protein OpuBA	741883	743217	+		opuBA_1	similar to AA sequence:UniProtKB:Q45460		1	0	0	0	0	0	0
657	PFR_JS15-1_641	ProWL	743214	743951	+	PROKKA_00652	Glycine betaine/carnitine/choline transport system permease protein OpuCB	743214	743951	+		opuCB_1	similar to AA sequence:UniProtKB:O34878		1	0	0	0	0	0	0
658	PFR_JS15-1_642	ProXL	743955	744986	+	PROKKA_00653	Putative osmoprotectant uptake system substrate-binding protein OsmF precursor	743955	744986	+		osmF_1	similar to AA sequence:UniProtKB:P33362		1	0	0	0	0	0	0
659	PFR_JS15-1_643	10 kDa chaperonin	745223	745519	+	PROKKA_00654	10 kDa chaperonin	745223	745519	+		groS	similar to AA sequence:UniProtKB:Q8NSS1		1	0	0	0	0	0	0
660	PFR_JS15-1_644	60 kDa chaperonin 2	745541	747133	+	PROKKA_00655	60 kDa chaperonin 1	745541	747133	+		groL1_1	similar to AA sequence:UniProtKB:Q00767		1	0	0	0	0	0	0
661	PFR_JS15-1_645	Putative insertion element ISCmi2 transposase	747237	747911	-	PROKKA_00656	IS2 transposase TnpB	747237	747911	-			protein motif:CLUSTERS:PRK09409		0	0	0	0	0	0	0
662	PFR_JS15-1_646	Inosine-5'-monophosphate dehydrogenase GuaB	748378	749898	+	PROKKA_00657	Inosine-5'-monophosphate dehydrogenase	748378	749898	+	1.1.1.205	guaB_1	similar to AA sequence:UniProtKB:P65167		1	0	0	0	0	0	0
663	PFR_JS15-1_647	IMP dehydrogenase family protein	750050	751153	+	PROKKA_00658	putative oxidoreductase/MSMEI_1564	750050	751153	+	1.-.-.-		similar to AA sequence:UniProtKB:A0QSU4		1	0	0	0	0	0	0
664	PFR_JS15-1_648	Chorismate mutase	751211	751513	+	PROKKA_00659	T-protein	751211	751513	+		tyrA	similar to AA sequence:UniProtKB:P07023		1	0	0	0	0	0	0
665	PFR_JS15-1_649	Transcription initiation factor	751817	753133	+	PROKKA_00660	hypothetical protein	751817	753133	+					0	0	0	0	0	0	0
666	PFR_JS15-1_650	Hypothetical protein	753158	754861	+	PROKKA_00661	hypothetical protein	753158	754861	+					0	0	0	0	0	0	0
667	PFR_JS15-1_651	Hypothetical protein	754874	755944	+	PROKKA_00662	hypothetical protein	754874	755944	+					0	0	0	0	0	0	0
668	PFR_JS15-1_652	Hypothetical protein	755934	756851	+	PROKKA_00663	N-acetylmuramoyl-L-alanine amidase	755934	756851	+			protein motif:Pfam:PF01520.12		1	0	0	0	0	0	0
669	PFR_JS15-1_653	Serine acetyltransferase	756886	757437	-	PROKKA_00664	Serine acetyltransferase	756886	757437	-	2.3.1.30	cysE	similar to AA sequence:UniProtKB:Q06750		1	0	0	0	0	0	0
670	PFR_JS15-1_654	Cysteine synthase	757434	758360	-	PROKKA_00665	O-acetylserine sulfhydrylase	757434	758360	-	2.5.1.47	cysK1_1	similar to AA sequence:UniProtKB:P0A534		1	0	0	0	0	0	0
671	PFR_JS15-1_655	Ribulokinase	758779	759690	+	PROKKA_00666	Ribulokinase	758779	759690	+	2.7.1.16	araB_1	similar to AA sequence:UniProtKB:P94524		0	0	0	0	0	0	0
672	PFR_JS15-1_656	Ribulokinase domain protein	759687	760331	+	PROKKA_00667	Ribulokinase	759687	760331	+	2.7.1.16	araB_2	similar to AA sequence:UniProtKB:Q9KBQ3		0	0	0	0	0	0	0
673	PFR_JS15-1_657	Class II aldolase/adducin family protein	760328	760975	+	PROKKA_00668	L-ribulose-5-phosphate 4-epimerase	760328	760975	+	5.1.3.4	araD	similar to AA sequence:UniProtKB:P94525		1	0	0	0	0	0	0
674	PFR_JS15-1_658	Hypothetical protein	760935	761033	+	PROKKA_00669	hypothetical protein	760935	761033	+					0	0	0	0	0	0	0
675	PFR_JS15-1_659	L-arabinose isomerase 1	761103	762623	+	PROKKA_00670	L-arabinose isomerase	761103	762623	+	5.3.1.4	araA	similar to AA sequence:UniProtKB:Q9S467		1	0	0	0	0	0	0
676	PFR_JS15-1_660	Transcriptional regulator	762650	763687	+	PROKKA_00671	Lactose operon repressor	762650	763687	+		lacI	similar to AA sequence:UniProtKB:P03023		1	0	0	0	0	0	0
677	PFR_JS15-1_661	Periplasmic binding protein/LacI transcriptional	763931	764911	+	PROKKA_00672	ABC transporter periplasmic-binding protein YtfQ precursor	763931	764911	+		ytfQ	similar to AA sequence:UniProtKB:P39325		0	0	0	0	0	0	0
678	PFR_JS15-1_662	Monosaccharide ABC transporter ATP-binding	765049	766581	+	PROKKA_00673	Ribose import ATP-binding protein RbsA	765049	766581	+	3.6.3.17	rbsA	similar to AA sequence:UniProtKB:P04983		0	0	0	0	0	0	0
679	PFR_JS15-1_663	Hypothetical protein	766578	766952	+	PROKKA_00674	Inner membrane ABC transporter permease protein YtfT	766578	766952	+		ytfT_1	similar to AA sequence:UniProtKB:P39328		0	0	0	0	0	0	0
680	PFR_JS15-1_664	Sugar transport protein (ABC superfamily,	766952	767635	+	PROKKA_00675	Inner membrane ABC transporter permease protein YtfT	766952	767635	+		ytfT_2	similar to AA sequence:UniProtKB:P39328		1	0	0	0	0	0	0
681	PFR_JS15-1_665	ABC transporter, permease protein YjfF	767632	768660	+	PROKKA_00676	Inner membrane ABC transporter permease protein YjfF	767632	768660	+		yjfF	similar to AA sequence:UniProtKB:P37772		1	0	0	0	0	0	0
682	PFR_JS15-1_666	GMP synthase (glutamine-hydrolyzing)	769069	770508	+	PROKKA_00677	GMP synthase [glutamine-hydrolyzing]	769069	770508	+	6.3.5.2	guaA_1	similar to AA sequence:UniProtKB:P0A5A1		1	0	0	0	0	0	0
683	PFR_JS15-1_667	Hypothetical protein	770397	770660	-	PROKKA_00678	hypothetical protein	770397	770660	-					0	0	0	0	0	0	0
684	PFR_JS15-1_668	Protein containing DUF1963	770713	771600	+	PROKKA_00679	hypothetical protein	770713	771600	+					1	0	0	0	0	0	0
685	PFR_JS15-1_669	NADPH:quinone reductase and related Zn-dependent	771651	772595	-	PROKKA_00680	Phthiocerol synthesis polyketide synthase type I PpsC	771651	772592	-	2.3.1.41	ppsC	similar to AA sequence:UniProtKB:P96202		1	0	0	0	0	0	0
686	PFR_JS15-1_670	Possible stress-response transcriptional	772892	773182	-	PROKKA_00681	PspC domain protein	772892	773182	-			protein motif:Pfam:PF04024.6		1	0	0	0	0	0	0
687	PFR_JS15-1_671	Sensor histidine kinase	773424	774767	+	PROKKA_00682	Sensor histidine kinase LiaS	773424	774767	+	2.7.13.3	liaS	similar to AA sequence:UniProtKB:O32198		1	0	0	0	0	0	0
688	PFR_JS15-1_672	Response regulator	774764	775462	+	PROKKA_00683	Transcriptional regulatory protein LiaR	774764	775462	+		liaR_1	similar to AA sequence:UniProtKB:O32197		1	0	0	0	0	0	0
689	PFR_JS15-1_673	Hypothetical protein	775699	775950	-	PROKKA_00684	hypothetical protein	775699	775950	-			protein motif:CLUSTERS:PRK10457		1	0	0	0	0	0	0
690	PFR_JS15-1_674	Iron compound ABC transporter, iron	776240	777256	+	PROKKA_00685	putative ABC transporter solute-binding protein YclQ precursor	776240	777256	+		yclQ	similar to AA sequence:UniProtKB:P94421		1	0	0	0	0	0	0
691	PFR_JS15-1_675	ABC-type enterochelin transport system, permease	777253	778269	+	PROKKA_00686	Iron-uptake system permease protein FeuB	777253	778269	+		feuB	similar to AA sequence:UniProtKB:P40410		1	0	0	0	0	0	0
692	PFR_JS15-1_676	ABC-type cobalamin/Fe3-siderophores transport	778339	779379	+	PROKKA_00687	Iron-uptake system permease protein FeuC	778339	779379	+		feuC	similar to AA sequence:UniProtKB:P40411		1	0	0	0	0	0	0
693	PFR_JS15-1_677	Fe(3 ) dicitrate transport ATP-binding protein	779376	780131	+	PROKKA_00688	putative siderophore transport system ATP-binding protein YusV	779376	780131	+		yusV_2	similar to AA sequence:UniProtKB:O32188		1	0	0	0	0	0	0
694	PFR_JS15-1_678	Phospholipase D domain protein	780204	781457	-	PROKKA_00689	Cardiolipin synthase	780204	781457	-	2.7.8.-	cls	similar to AA sequence:UniProtKB:P63801		1	0	0	0	0	0	0
695	PFR_JS15-1_679	ATP-dependent DNA helicase PcrA	781594	784083	+	PROKKA_00690	ATP-dependent DNA helicase UvrD1	781594	784083	+	3.6.4.12	uvrD1_1	similar to AA sequence:UniProtKB:P0A5A3		1	0	0	0	0	0	0
696	PFR_JS15-1_680	Hypothetical protein	784177	785655	+	PROKKA_00691	hypothetical protein	784177	785655	+					1	0	0	0	0	0	0
697	PFR_JS15-1_681	Phosphoribosylglycinamide formyltransferase	785666	786277	+	PROKKA_00692	Phosphoribosylglycinamide formyltransferase	785666	786277	+	2.1.2.2	purN	similar to AA sequence:UniProtKB:P71554		1	0	0	0	0	0	0
698	PFR_JS15-1_682	Bifunctional purine biosynthesis protein PurH	786399	787952	+	PROKKA_00693	Bifunctional purine biosynthesis protein PurH	786399	787952	+		purH	similar to AA sequence:UniProtKB:Q8NS21		1	0	0	0	0	0	0
699	PFR_JS15-1_683	Bifunctional protein FolD	788026	788886	+	PROKKA_00694	Bifunctional protein FolD protein	788026	788886	+		folD	similar to AA sequence:UniProtKB:Q8NSM0		1	0	0	0	0	0	0
700	PFR_JS15-1_684	Hypothetical protein	788892	789215	+	PROKKA_00695	hypothetical protein	788892	789215	+					1	0	0	0	0	0	0
701	PFR_JS15-1_685	Malate dehydrogenase	789397	790383	-	PROKKA_00696	Malate dehydrogenase	789397	790383	-	1.1.1.37	mdh_1	similar to AA sequence:UniProtKB:P10584		1	0	0	0	0	0	0
702	PFR_JS15-1_686	Isocitrate dehydrogenase [NADP]	790561	791778	+	PROKKA_00697	Isocitrate dehydrogenase [NADP]	790561	791778	+	1.1.1.42	icd	similar to AA sequence:UniProtKB:P65097		1	0	0	0	0	0	0
703	PFR_JS15-1_687	Hypothetical protein	791939	792250	-	PROKKA_00698	hypothetical protein	791939	792250	-					1	0	0	0	0	0	0
704	PFR_JS15-1_688	AzlC family protein	792247	792915	-	PROKKA_00699	AzlC protein	792247	792915	-			protein motif:Pfam:PF03591.8		0	0	0	0	0	0	0
705	PFR_JS15-1_689	CBS domain pair protein	793209	794729	+	PROKKA_00700	Hemolysin C	793209	794729	+		tlyC	similar to AA sequence:UniProtKB:O05961		1	0	0	0	0	0	0
706	PFR_JS15-1_690	Phosphotransferase family protein	794810	796099	+	PROKKA_00701	Phosphotransferase enzyme family protein	794810	796099	+			protein motif:Pfam:PF01636.17		1	0	0	0	0	0	0
707	PFR_JS15-1_691	Basic membrane protein	796349	797293	+	PROKKA_00702	Basic membrane protein	796349	797293	+			protein motif:Pfam:PF02608.8		1	0	0	0	0	0	0
708	PFR_JS15-1_692	Ribonuclease H	797365	798396	+	PROKKA_00703	Ribonuclease HI	797365	798396	+	3.1.26.4	rnhA	similar to AA sequence:UniProtKB:P0A7Y4		1	0	0	0	0	0	0
709	PFR_JS15-1_693	Hypothetical protein	798473	798988	+	PROKKA_00704	hypothetical protein	798473	798988	+					1	0	0	0	0	0	0
710	PFR_JS15-1_694	Enoyl-CoA hydratase echA9	799065	799997	-	PROKKA_00705	putative enoyl-CoA hydratase	799065	799997	-	4.2.1.17	fadB	similar to AA sequence:UniProtKB:P94549		1	0	0	0	0	0	0
711	PFR_JS15-1_695	Methionyl-tRNA synthetase (Methionine--tRNA	800038	801984	+	PROKKA_00706	Methionine--tRNA ligase	800038	801984	+	6.1.1.10	metG	similar to AA sequence:UniProtKB:P00959		1	0	0	0	0	0	0
712	PFR_JS15-1_696	Silent information regulator protein Sir2	802226	803149	+	PROKKA_00707	NAD-dependent protein deacetylase	802226	803149	+	3.5.1.-	cobB_2	similar to AA sequence:UniProtKB:Q9WYW0		1	0	0	0	0	0	0
713	PFR_JS15-1_697	PF04239 family protein	803168	803812	-	PROKKA_00708	hypothetical protein	803168	803812	-					1	0	0	0	0	0	0
714	PFR_JS15-1_698	Hypothetical protein	803809	804264	-	PROKKA_00709	hypothetical protein	803809	804264	-					0	0	0	0	0	0	0
715	PFR_JS15-1_699	Transcriptional regulator, MerR family	804437	804802	-	PROKKA_00710	HTH-type transcriptional regulator AdhR	804437	804802	-		adhR	similar to AA sequence:UniProtKB:O06008		1	0	0	0	0	0	0
716	PFR_JS15-1_700	Carboxymuconolactone decarboxylase	804915	805322	+	PROKKA_00711	Carboxymuconolactone decarboxylase family protein	804915	805322	+			protein motif:Pfam:PF02627.1		1	0	0	0	0	0	0
717	PFR_JS15-1_701	Hypothetical protein	805319	805489	+	PROKKA_00712	NAD-dependent protein deacetylase	805319	805489	+		cobB_3	protein motif:HAMAP:MF_01968		0	0	0	0	0	0	0
718	PFR_JS15-1_702	Puromycin N-acetyltransferase	806621	807241	-	PROKKA_00713	Acetyltransferase (GNAT) family protein	806621	807241	-			protein motif:Pfam:PF00583.18		1	0	0	0	0	0	0
719	PFR_JS15-1_703	Hypothetical protein	807562	807960	+	PROKKA_00714	hypothetical protein	807562	807960	+					0	0	0	0	0	0	0
720	PFR_JS15-1_704	Chlorophyll synthesis pathway protein BchC	808092	809135	-	PROKKA_00715	Alcohol dehydrogenase	808092	809135	-	1.1.1.1	adhT	similar to AA sequence:UniProtKB:P12311		1	0	0	0	0	0	0
721	PFR_JS15-1_705	Hypothetical protein	809273	811060	-	PROKKA_00716	hypothetical protein	809273	811060	-					1	0	0	0	0	0	0
722	PFR_JS15-1_706	Pyruvate-flavodoxin oxidoreductase (Precursor)	811372	815091	+	PROKKA_00717	Pyruvate-flavodoxin oxidoreductase	811372	815091	+	1.2.7.-	nifJ_2	similar to AA sequence:UniProtKB:Q06879		1	0	0	0	0	0	0
723	PFR_JS15-1_707	Genome sequencing data, contig C257	815095	816102	+	PROKKA_00718	NAD-dependent dihydropyrimidine dehydrogenase subunit PreA	815095	816102	+	1.3.1.1	preA_2	similar to AA sequence:UniProtKB:P25889		1	0	0	0	0	0	0
724	PFR_JS15-1_708	Hypothetical protein	816130	816672	-	PROKKA_00719	hypothetical protein	816130	816672	-					1	0	0	0	0	0	0
725	PFR_JS15-1_709	Phosphoribosylglycinamide synthetase, ATP-grasp	816725	818506	-	PROKKA_00720	2-oxoglutarate carboxylase small subunit	816725	818506	-	6.4.1.7	cfiB	similar to AA sequence:UniProtKB:D3DJ42		1	0	0	0	0	0	0
726	PFR_JS15-1_710	Endonuclease VIII and DNA N-glycosylase with an	818662	819477	-	PROKKA_00721	Endonuclease 8 1	818662	819477	-	3.2.2.-	nei1	similar to AA sequence:UniProtKB:P64158		1	0	0	0	0	0	0
727	PFR_JS15-1_711	Hypothetical protein	819628	819843	-	PROKKA_00722	hypothetical protein	819628	819843	-					1	0	0	0	0	0	0
728	PFR_JS15-1_712	Hypothetical protein	820124	820603	+	PROKKA_00723	hypothetical protein	820124	820603	+					1	0	0	0	0	0	0
729	PFR_JS15-1_713	Hydrolase, NUDIX family	820694	821194	-	PROKKA_00724	dihydroneopterin triphosphate pyrophosphatase	820694	821194	-			protein motif:CLUSTERS:PRK09438		0	0	0	0	0	0	0
730	PFR_JS15-1_714	Septum formation protein Maf	821198	821926	-	PROKKA_00725	Maf-like protein YceF	821198	821926	-		yceF	similar to AA sequence:UniProtKB:P0A729		1	0	0	0	0	0	0
731	PFR_JS15-1_715	Hypothetical protein	821977	822231	-	PROKKA_00726	hypothetical protein	821977	822231	-					1	0	0	0	0	0	0
732	PFR_JS15-1_716	Carboxyl transferase domain protein	822237	823811	-	PROKKA_00727	putative propionyl-CoA carboxylase beta chain 5	822237	823811	-	6.4.1.3	accD5	similar to AA sequence:UniProtKB:P96885		1	0	0	0	0	0	0
733	PFR_JS15-1_717	Integral membrane protein	823943	825289	+	PROKKA_00728	Inner membrane protein YjjP	823943	825289	+		yjjP	similar to AA sequence:UniProtKB:P0ADD5		1	0	0	0	0	0	0
734	PFR_JS15-1_718	Hypothetical protein	825397	825894	-	PROKKA_00729	hypothetical protein	825397	825894	-					0	0	0	0	0	0	0
735	PFR_JS15-1_719	Putative exporter of polyketide antibiotics-like	825951	827033	-	PROKKA_00730	hypothetical protein	825951	827033	-					1	0	0	0	0	0	0
736	PFR_JS15-1_720	Tetronasin ABC transporter ATP-binding protein	827030	827974	-	PROKKA_00731	Daunorubicin/doxorubicin resistance ATP-binding protein DrrA	827030	827974	-	3.6.3.-	drrA_3	similar to AA sequence:UniProtKB:P32010		1	0	0	0	0	0	0
737	PFR_JS15-1_721	Hypothetical protein	828079	828597	+	PROKKA_00732	hypothetical protein	828079	828597	+					1	0	0	0	0	0	0
738	PFR_JS15-1_722	Transcription regulator	828712	829290	+	PROKKA_00733	MarR family protein	828712	829290	+			protein motif:Pfam:PF01047.16		1	0	0	0	0	0	0
739	PFR_JS15-1_723	Transcriptional regulator	829304	829909	-	PROKKA_00734	DNA-binding transcriptional repressor AcrR	829304	829909	-			protein motif:CLUSTERS:PRK10668		1	0	0	0	0	0	0
740	PFR_JS15-1_724	Biotin apo-protein ligase	830059	830850	+	PROKKA_00735	Bifunctional ligase/repressor BirA	830059	830850	+	6.3.4.15	birA	similar to AA sequence:UniProtKB:P0CI75		1	0	0	0	0	0	0
741	PFR_JS15-1_725	Hypothetical protein	830884	831387	+	PROKKA_00736	Bacterial membrane flanked domain protein	830884	831387	+			protein motif:Pfam:PF03703.8		1	0	0	0	0	0	0
742	PFR_JS15-1_726	Transcriptional regulator, TetR family	831469	832053	+	PROKKA_00737	Bacterial regulatory proteins, tetR family	831469	832053	+			protein motif:Pfam:PF00440.17		1	0	0	0	0	0	0
743	PFR_JS15-1_727	Peptidase family S51	832123	832839	-	PROKKA_00738	Peptidase family S51	832123	832839	-			protein motif:Pfam:PF03575.1		1	0	0	0	0	0	0
744	PFR_JS15-1_728	Phosphoribosylaminoimidazole carboxylase, ATPase	832917	834089	+	PROKKA_00739	N5-carboxyaminoimidazole ribonucleotide synthase	832917	834089	+	6.3.4.18	purK	similar to AA sequence:UniProtKB:O66608		1	0	0	0	0	0	0
745	PFR_JS15-1_729	Phosphoribosylaminoimidazole carboxylase,	834082	834642	+	PROKKA_00740	N5-carboxyaminoimidazole ribonucleotide mutase	834082	834642	+	5.4.99.18	purE	similar to AA sequence:UniProtKB:P96880		1	0	0	0	0	0	0
746	PFR_JS15-1_730	Cell envelope function transcriptional attenuator	834680	836038	-	PROKKA_00741	Regulatory protein MsrR	834680	836038	-		msrR	similar to AA sequence:UniProtKB:Q99Q02		1	0	0	0	0	0	0
747	PFR_JS15-1_731	Mannose-1-phosphate guanylyltransferase (GDP)	836164	837243	+	PROKKA_00742	Mannose-1-phosphate guanylyltransferase RfbM	836164	837243	+	2.7.7.13	rfbM	similar to AA sequence:UniProtKB:P26404		1	0	0	0	0	0	0
748	PFR_JS15-1_732	Hypothetical protein	837240	838322	+	PROKKA_00743	hypothetical protein	837240	838322	+					0	0	0	0	0	0	0
749	PFR_JS15-1_733	Transcription factor WhiB	838655	838915	+	PROKKA_00744	Transcriptional regulator WhiB	838655	838915	+		whiB	similar to AA sequence:UniProtKB:Q7AKN0		1	0	0	0	0	0	0
750	PFR_JS15-1_734	Putative glycosyltransferase	839112	842363	+	PROKKA_00745	hypothetical protein	839112	842363	+					1	0	0	0	0	0	0
751	PFR_JS15-1_735	Hypothetical protein	842360	843712	+	PROKKA_00746	hypothetical protein	842360	843712	+					1	0	0	0	0	0	0
752	PFR_JS15-1_736	Hypothetical protein	843817	844257	-	PROKKA_00747	Possibl zinc metallo-peptidase	843817	844257	-			protein motif:Pfam:PF06262.5		1	0	0	0	0	0	0
753	PFR_JS15-1_737	Hypothetical protein	844324	844824	+	PROKKA_00748	hypothetical protein	844324	844824	+					1	0	0	0	0	0	0
754	PFR_JS15-1_738	HAD-superfamily hydrolase, subfamily IIB	844940	845755	+	PROKKA_00749	Eukaryotic phosphomannomutase	844940	845755	+			protein motif:Pfam:PF03332.7		1	0	0	0	0	0	0
755	PFR_JS15-1_739	Hypothetical protein	845816	846016	+	PROKKA_00750	hypothetical protein	845816	846016	+			protein motif:CLUSTERS:PRK11827		1	0	0	0	0	0	0
756	PFR_JS15-1_740	SIS regulatory protein	846024	847040	+	PROKKA_00751	hypothetical protein	846024	847040	+			protein motif:Pfam:PF10432.3	Bacterial phospho-glucose isomerase C-terminal region	1	0	0	0	0	0	0
757	PFR_JS15-1_741	Cation diffusion facilitator family transporter	847152	848192	+	PROKKA_00752	ferrous iron efflux protein F	847152	848192	+			protein motif:CLUSTERS:PRK09509		1	0	0	0	0	0	0
758	PFR_JS15-1_742	PF11238 family protein	848348	848611	-	PROKKA_00753	hypothetical protein	848348	848611	-					1	0	0	0	0	0	0
759	PFR_JS15-1_743	Multidrug resistance efflux protein	848670	850181	+	PROKKA_00754	Multidrug resistance protein 3	848670	850181	+		bmr3_1	similar to AA sequence:UniProtKB:P96712	Putative antibiotic resistance	1	0	0	0	0	0	0
760	PFR_JS15-1_744	Hypothetical protein	850355	851407	+	PROKKA_00755	RDD family protein	850355	851407	+			protein motif:Pfam:PF06271.6		1	0	0	0	0	0	0
761	PFR_JS15-1_745	4-alpha-glucanotransferase malQ	851537	853726	+	PROKKA_00756	4-alpha-glucanotransferase	851537	853726	+	2.4.1.25	malQ_1	similar to AA sequence:UniProtKB:Q59266		1	0	0	0	0	0	0
762	PFR_JS15-1_746	Mandelate racemase/muconate lactonizing protein	853723	854721	+	PROKKA_00757	L-Ala-D/L-Glu epimerase	853723	854721	+	5.1.1.-		similar to AA sequence:UniProtKB:Q97MK4		1	0	0	0	0	0	0
763	PFR_JS15-1_747	2-succinyl-5-enolpyruvyl-6-hydroxy-3-cyclohexene-1-carboxylate	854846	856501	+	PROKKA_00758	2-succinyl-5-enolpyruvyl-6-hydroxy-3-cyclohexene-1-carboxylate synthase	854846	856501	+	2.2.1.9	menD	similar to AA sequence:UniProtKB:Q99V50		1	0	0	0	0	0	0
764	PFR_JS15-1_748	Putative excinuclease ABC, A subunit	856609	859179	+	PROKKA_00759	UvrABC system protein A	856609	859179	+		uvrA_1	similar to AA sequence:UniProtKB:P63383		0	0	0	0	0	0	0
765	PFR_JS15-1_749	Hypothetical protein	859350	859826	+	PROKKA_00760	hypothetical protein	859350	859826	+					0	0	0	0	0	0	0
766	PFR_JS15-1_750	Isochorismate synthase	859942	861165	-	PROKKA_00761	Isochorismate synthase EntC	859942	861165	-	5.4.4.2	entC	similar to AA sequence:UniProtKB:P0AEJ2		1	0	0	0	0	0	0
767	PFR_JS15-1_751	O-succinylbenzoic acid-CoA ligase menE	861276	862508	-	PROKKA_00762	2-succinylbenzoate--CoA ligase	861276	862508	-	6.2.1.26	menE	similar to AA sequence:UniProtKB:P63526		1	0	0	0	0	0	0
768	PFR_JS15-1_752	Naphthoate synthase	862581	863666	-	PROKKA_00763	1,4-Dihydroxy-2-naphthoyl-CoA synthase	862581	863666	-	4.1.3.36	menB	similar to AA sequence:UniProtKB:A0QRD3		1	0	0	0	0	0	0
769	PFR_JS15-1_753	Nicotinate phosphoribosyltransferase	863748	865103	-	PROKKA_00764	Nicotinate phosphoribosyltransferase pncB1	863748	865103	-	6.3.4.21	pncB1	similar to AA sequence:UniProtKB:Q10641		1	0	0	0	0	0	0
770	PFR_JS15-1_754	ATP-dependent Clp protease adapter protein ClpS	865230	865523	+	PROKKA_00765	ATP-dependent Clp protease adaptor protein ClpS	865230	865523	+			protein motif:CLUSTERS:PRK00033		1	0	0	0	0	0	0
771	PFR_JS15-1_755	Hypothetical protein	865520	866128	+	PROKKA_00766	hypothetical protein	865520	866128	+					1	0	0	0	0	0	0
772	PFR_JS15-1_756	Glutamate racemase	866216	867034	+	PROKKA_00767	Glutamate racemase	866216	867034	+	5.1.1.3	murI	similar to AA sequence:UniProtKB:O31332		1	0	0	0	0	0	0
773	PFR_JS15-1_757	TRNA nucleotidyltransferase	867188	867949	+	PROKKA_00768	Ribonuclease PH	867188	867949	+	2.7.7.56	rph	similar to AA sequence:UniProtKB:P50597		1	0	0	0	0	0	0
774	PFR_JS15-1_758	Non-canonical purine NTP pyrophosphatase	867946	868752	+	PROKKA_00769	dITP/XTP pyrophosphatase	867946	868752	+	3.6.1.19	rdgB	similar to AA sequence:UniProtKB:P52061		1	0	0	0	0	0	0
775	PFR_JS15-1_759	Thymidylate synthase	868754	869566	+	PROKKA_00770	Thymidylate synthase	868754	869566	+	2.1.1.45	thyA	similar to AA sequence:UniProtKB:P67042		1	0	0	0	0	0	0
776	PFR_JS15-1_760	Dihydrofolate reductase	869681	870283	+	PROKKA_00771	Dihydrofolate reductase	869681	870283	+	1.5.1.3	folA	similar to AA sequence:UniProtKB:P04174		1	0	0	0	0	0	0
777	PFR_JS15-1_761	DNA polymerase IV	870287	871738	+	PROKKA_00772	DNA polymerase IV	870287	871738	+	2.7.7.7	dinB_1	similar to AA sequence:UniProtKB:Q47155		1	0	0	0	0	0	0
778	PFR_JS15-1_762	LAO/AO transport system ATPase	871942	872955	-	PROKKA_00773	putative GTPase/MT1543	871942	872955	-	3.6.-.-		similar to AA sequence:UniProtKB:P63577		1	0	0	0	0	0	0
779	PFR_JS15-1_763	Methylmalonyl-CoA mutase large subunit mutB	872948	875134	-	PROKKA_00774	Methylmalonyl-CoA mutase large subunit	872948	875134	-	5.4.99.2	mutB	similar to AA sequence:UniProtKB:P11653		1	0	0	0	0	0	0
780	PFR_JS15-1_764	Methylmalonyl-CoA mutase small subunit mutA	875131	877047	-	PROKKA_00775	Methylmalonyl-CoA mutase small subunit	875131	877047	-	5.4.99.2	mutA	similar to AA sequence:UniProtKB:P11652		1	0	0	0	0	0	0
781	PFR_JS15-1_765	Hypothetical protein	877044	877307	-	PROKKA_00776	hypothetical protein	877044	877307	-					1	0	0	0	0	0	0
														B12-riboswitch for mutA (-)
														B12-riboswitch for cbiL (+)
782	PFR_JS15-1_766	Precorrin-2 C20-methyltransferase CbiL	877879	878652	+	PROKKA_00777	Precorrin-2 C(20)-methyltransferase	877879	878652	+	2.1.1.130	cobI	similar to AA sequence:UniProtKB:P21639	B12 biosynthesis	1	0	0	0	0	0	0
783	PFR_JS15-1_767	Tetrapyrrole methylase, precorrin-3 methylase,	878682	879641	+	PROKKA_00778	Cobalt-precorrin-4 C(11)-methyltransferase	878682	879641	+	2.1.1.271	cbiF	similar to AA sequence:UniProtKB:P0A2G9	B12 biosynthesis	1	0	0	0	0	0	0
784	PFR_JS15-1_768	Bifunctional cbiH protein and precorrin-3B	879638	882298	+	PROKKA_00779	Cobalt-precorrin-3B C(17)-methyltransferase	879638	882298	+	2.1.1.-	cbiH	similar to AA sequence:UniProtKB:Q05590	B12 biosynthesis	0	0	0	0	0	0	0
785	PFR_JS15-1_769	Sirohydrochlorin cobaltochelatase	882291	883532	+	PROKKA_00780	Sirohydrochlorin cobaltochelatase	882291	883532	+	4.99.1.3	cbiX	similar to AA sequence:UniProtKB:O87690	B12 biosynthesis	1	0	0	0	0	0	0
786	PFR_JS15-1_770	Cobalamin biosynthesis protein CbiD (Precursor)	883564	884856	-	PROKKA_00781	cobalt-precorrin-6A synthase	883564	884856	-			protein motif:CLUSTERS:PRK00075	B12 biosynthesis	1	0	0	0	0	0	0
787	PFR_JS15-1_771	Precorrin-8X methylmutase	884853	885506	-	PROKKA_00782	Precorrin-8X methylmutase	884853	885506	-	5.4.1.2	cobH	similar to AA sequence:UniProtKB:P21638	B12 biosynthesis	1	0	0	0	0	0	0
788	PFR_JS15-1_772	Precorrin-6Y C5,15-methyltransferase, CbiT	885603	886193	-	PROKKA_00783	Precorrin-6Y C(5,15)-methyltransferase [decarboxylating]	885603	886193	-	2.1.1.132	cobL	similar to AA sequence:UniProtKB:P21921	B12 biosynthesis	1	0	0	0	0	0	0
789	PFR_JS15-1_773	CobK	886266	887033	-	PROKKA_00784	Precorrin-6A reductase	886266	887033	-	1.3.1.54	cobK	similar to AA sequence:UniProtKB:P21920	B12 biosynthesis	1	0	0	0	0	0	0
790	PFR_JS15-1_774	Class II aldolase/adducin family protein	887014	887706	-	PROKKA_00785	L-ribulose-5-phosphate 4-epimerase UlaF	887014	887706	-	5.1.3.4	ulaF	similar to AA sequence:UniProtKB:P39306		1	0	0	0	0	0	0
791						PROKKA_00786	tRNA-Leu(tag)	887772	887855	-			COORDINATES:profile:Aragorn:1.2		0					0	0
792	PFR_JS15-1_775	Bacterioferritin comigratory protein	887999	888487	-	PROKKA_00787	Putative peroxiredoxin/MT2597	887999	888487	-	1.11.1.15	bcp	similar to AA sequence:UniProtKB:O53226		1	0	0	0	0	0	0
793	PFR_JS15-1_776	Hypothetical protein	888661	888960	+	PROKKA_00788	hypothetical protein	888661	888960	+					1	0	0	0	0	0	0
794	PFR_JS15-1_777	10 kDa chaperonin	888987	889436	+	PROKKA_00789	10 kDa chaperonin 5	888987	889436	+		groS5	similar to AA sequence:UniProtKB:P35474		1	0	0	0	0	0	0
795						PROKKA_00790	tRNA-Lys(ctt)	889494	889567	+			COORDINATES:profile:Aragorn:1.2		0					0	0
796	PFR_JS15-1_778	CobB/CobQ-like glutamine amidotransferase domain	889698	890471	-	PROKKA_00791	Cobyric acid synthase	889698	890471	-		cobQ_1	similar to AA sequence:UniProtKB:P29932		1	0	0	0	0	0	0
797	PFR_JS15-1_779	Mur ligase middle domain protein	890465	891787	-	PROKKA_00792	UDP-N-acetylmuramoylalanyl-D-glutamate--2,6-diaminopimelate ligase	890465	891787	-			protein motif:CLUSTERS:PRK00139		1	0	0	0	0	0	0
798	PFR_JS15-1_780	Putative secreted tyrosine phosphatase	891891	892736	-	PROKKA_00793	Tyrosine-protein phosphatase precursor	891891	892736	-	3.1.3.48	iphP	similar to AA sequence:UniProtKB:Q05918		1	0	0	0	0	0	0
799	PFR_JS15-1_781	Putative excision nuclease ABC subunit	892806	895139	-	PROKKA_00794	UvrABC system protein A	892806	895139	-		uvrA_2	similar to AA sequence:UniProtKB:Q9WYV0		1	0	0	0	0	0	0
800	PFR_JS15-1_782	Metal dependent phosphohydrolase	895214	895720	+	PROKKA_00795	Bifunctional (p)ppGpp synthase/hydrolase RelA	895214	895720	+		relA_1	similar to AA sequence:UniProtKB:Q54089		1	0	0	0	0	0	0
801						PROKKA_00796	tRNA-His(gtg)	896307	896382	-			COORDINATES:profile:Aragorn:1.2		0					0	0
802	PFR_JS15-1_783	Oligoribonuclease	896458	897138	-	PROKKA_00797	Oligoribonuclease	896458	897138	-	3.1.-.-	orn	similar to AA sequence:UniProtKB:P57666		1	0	0	0	0	0	0
803	PFR_JS15-1_784	Transporter, major facilitator family protein	897150	898361	-	PROKKA_00798	multidrug resistance protein MdtH	897150	898361	-			protein motif:CLUSTERS:PRK11646	Putative antibiotic resistance	0	0	0	0	0	0	0
804						PROKKA_00799	tRNA-Arg(tct)	898509	898583	+			COORDINATES:profile:Aragorn:1.2		0					0	0
805	PFR_JS15-1_785	Protease PrsW family protein	898655	900157	+	PROKKA_00800	hypothetical protein	898655	900157	+					1	0	0	0	0	0	0
806	PFR_JS15-1_786	ATP-binding protein SCC61A06c	900227	902089	+	PROKKA_00801	Dynamin family protein	900227	902089	+			protein motif:Pfam:PF00350.17		1	0	0	0	0	0	0
807	PFR_JS15-1_787	Dynamin domain protein	902086	903729	+	PROKKA_00802	GTPase Era	902086	903729	+			protein motif:CLUSTERS:PRK00089		0	0	0	0	0	0	0
808	PFR_JS15-1_788	Hypothetical protein	903726	904388	+	PROKKA_00803	hypothetical protein	903726	904388	+					1	0	0	0	0	0	0
809	PFR_JS15-1_789	Hypothetical protein	904605	905105	+	PROKKA_00804	Single-stranded DNA-binding protein 1	904605	905105	+		ssb1	similar to AA sequence:UniProtKB:Q9KYI9		1	0	0	0	0	0	0
810	PFR_JS15-1_790	ATP-binding cassette protein, ChvD family	905301	906989	+	PROKKA_00805	putative ABC transporter ATP-binding protein/MT2552	905301	906989	+			similar to AA sequence:UniProtKB:O53204		1	0	0	0	0	0	0
811	PFR_JS15-1_791	Dihydroxyacetone kinase, DhaK subunit	907161	908156	+	PROKKA_00806	PTS-dependent dihydroxyacetone kinase, dihydroxyacetone-binding subunit DhaK	907161	908156	+	2.7.-.-	dhaK_1	similar to AA sequence:UniProtKB:P76015		1	0	0	0	0	0	0
812	PFR_JS15-1_792	Dihydroxyacetone kinase, L subunit	908156	908785	+	PROKKA_00807	PTS-dependent dihydroxyacetone kinase, ADP-binding subunit DhaL	908156	908785	+	2.7.-.-	dhaL	similar to AA sequence:UniProtKB:P76014		1	0	0	0	0	0	0
813	PFR_JS15-1_793	Dihydroxyacetone kinase subunit M	908798	910318	+	PROKKA_00808	PTS-dependent dihydroxyacetone kinase, phosphotransferase subunit DhaM	908798	910318	+		dhaM	similar to AA sequence:UniProtKB:P37349		1	0	0	0	0	0	0
814	PFR_JS15-1_794	Hypothetical protein	910305	911675	-	PROKKA_00809	hypothetical protein	910305	911675	-					1	0	0	0	0	0	0
815	PFR_JS15-1_795	Peptidyl-dipeptidase Dcp	911732	913768	+	PROKKA_00810	Peptidyl-dipeptidase dcp	911732	913768	+	3.4.15.5	dcp	similar to AA sequence:UniProtKB:P24171		1	0	0	0	0	0	0
816	PFR_JS15-1_796	FAD linked oxidase protein	913889	916717	-	PROKKA_00811	putative FAD-linked oxidoreductase	913889	916717	-	1.-.-.-		similar to AA sequence:UniProtKB:Q50685		1	0	0	0	0	0	0
817	PFR_JS15-1_797	Transcriptional regulator, MarR family	916723	917181	-	PROKKA_00812	Transcriptional repressor MprA	916723	917181	-		mprA_2	similar to AA sequence:UniProtKB:P0ACR9		1	0	0	0	0	0	0
818	PFR_JS15-1_798	AMP-dependent synthetase/ligase	917358	919247	+	PROKKA_00813	Long-chain-fatty-acid--CoA ligase FadD15	917358	919247	+	6.2.1.3		similar to AA sequence:UniProtKB:O53521		1	0	0	0	0	0	0
819	PFR_JS15-1_799	Acyl-CoA thioester hydrolase, YbgC/YbaW family	919253	920134	+	PROKKA_00814	Thioesterase superfamily protein	919253	920134	+			protein motif:Pfam:PF03061.16		1	0	0	0	0	0	0
820	PFR_JS15-1_800	Putative phosphomethylpyrimidine kinase	920281	921102	-	PROKKA_00815	Pyridoxine kinase	920281	921102	-	2.7.1.35	pdxK	similar to AA sequence:UniProtKB:P39610		0	0	0	0	0	0	0
821	PFR_JS15-1_801	6-phosphogluconate dehydrogenase, decarboxylating	921232	922689	-	PROKKA_00816	6-phosphogluconate dehydrogenase, decarboxylating	921232	922689	-	1.1.1.44	gnd	similar to AA sequence:UniProtKB:P00350		1	0	0	0	0	0	0
822	PFR_JS15-1_802	Aminopeptidase	922902	925505	-	PROKKA_00817	Aminopeptidase N	922902	925505	-	3.4.11.2	pepN	similar to AA sequence:UniProtKB:Q11010		1	0	0	0	0	0	0
823	PFR_JS15-1_803	DSBA oxidoreductase	925848	926462	+	PROKKA_00818	hypothetical protein	925848	926462	+					0	0	0	0	0	0	0
824	PFR_JS15-1_804	Hypothetical protein	926686	927480	+	PROKKA_00819	hypothetical protein	926686	927480	+					1	0	0	0	0	0	0
825	PFR_JS15-1_805	DNA ligase	927557	929851	+	PROKKA_00820	DNA ligase	927557	929851	+	6.5.1.2	ligA	similar to AA sequence:UniProtKB:A0QUW7		1	0	0	0	0	0	0
826	PFR_JS15-1_806	Transcriptional regulator	929919	930485	-	PROKKA_00821	Bacterial regulatory proteins, tetR family	929919	930485	-			protein motif:Pfam:PF00440.17		0	0	0	0	0	0	0
827	PFR_JS15-1_807	Permease of the drug/metabolite transporter (DMT)	930564	931436	+	PROKKA_00822	putative DMT superfamily transporter inner membrane protein	930564	931436	+			protein motif:CLUSTERS:PRK11272		0	0	0	0	0	0	0
828	PFR_JS15-1_808	Hypothetical protein	931503	931667	+	PROKKA_00823	hypothetical protein	931503	931667	+					0	0	0	0	0	0	0
829	PFR_JS15-1_809	Transposase, undefined	931905	932489	+	PROKKA_00824	Integrase core domain protein	931905	932489	+			protein motif:Pfam:PF00665.20		0	0	0	0	0	0	0
830	PFR_JS15-1_810	Hypothetical protein	932486	934039	-	PROKKA_00825	hypothetical protein	932486	934039	-					1	0	0	0	0	0	0
831	PFR_JS15-1_811	Hypothetical protein	934274	934465	-	PROKKA_00826	hypothetical protein	934274	934465	-					1	0	0	0	0	0	0
832	PFR_JS15-1_812	Quaternary ammonium compound-resistance protein	934593	934907	+	PROKKA_00827	Quaternary ammonium compound-resistance protein SugE	934593	934907	+		sugE	similar to AA sequence:UniProtKB:P69937		1	0	0	0	0	0	0
833						PROKKA_00828	tRNA-Pro(tgg)	935105	935179	-			COORDINATES:profile:Aragorn:1.2		0					0	0
834						PROKKA_00829	tRNA-Gly(tcc)	935439	935512	+			COORDINATES:profile:Aragorn:1.2		0					0	0
835	PFR_JS15-1_813	Trigger factor	935643	937226	+	PROKKA_00830	Trigger factor	935643	937226	+	5.2.1.8	tig	similar to AA sequence:UniProtKB:A0R199		1	0	0	0	0	0	0
836	PFR_JS15-1_814	Inner membrane protein YhhT	937451	938644	+	PROKKA_00831	AI-2 transport protein TqsA	937451	938644	+		tqsA_1	similar to AA sequence:UniProtKB:P0AFS5		1	0	0	0	0	0	0
837	PFR_JS15-1_815	Pheromone autoinducer 2 transporter	938877	940109	+	PROKKA_00832	AI-2 transport protein TqsA	938877	940109	+		tqsA_2	similar to AA sequence:UniProtKB:P0AFS5		1	0	0	0	0	0	0
838	PFR_JS15-1_816	ATP-dependent Clp protease proteolytic subunit 2	940196	940831	+	PROKKA_00833	ATP-dependent Clp protease proteolytic subunit 2	940196	940831	+	3.4.21.92	clpP2_1	similar to AA sequence:UniProtKB:Q8NN01		1	0	0	0	0	0	0
839	PFR_JS15-1_817	ATP-dependent Clp protease proteolytic subunit 1	940855	941544	+	PROKKA_00834	ATP-dependent Clp protease proteolytic subunit 2	940855	941544	+	3.4.21.92	clpP2_2	similar to AA sequence:UniProtKB:Q9ZH58		1	0	0	0	0	0	0
840	PFR_JS15-1_818	ATP-dependent Clp protease ATP-binding subunit	941666	942943	+	PROKKA_00835	tRNA-Pro(ggg)	941807	941888	-			COORDINATES:profile:Aragorn:1.2		0	0	0	0	0	0	0
841	PFR_JS15-1_819	Hypothetical protein	943055	943399	-	PROKKA_00836	hypothetical protein	943055	943399	-					0	0	0	0	0	0	0
842	PFR_JS15-1_820	Threonine synthase	943488	944930	+	PROKKA_00837	Threonine synthase	943488	944930	+	4.2.3.1	thrC	similar to AA sequence:UniProtKB:P23669		1	0	0	0	0	0	0
843	PFR_JS15-1_821	Phosphofructokinase	945009	946130	+	PROKKA_00838	6-phosphofructokinase	945009	946130	+	2.7.1.11	pfkA	similar to AA sequence:UniProtKB:Q8NR14		1	0	0	0	0	0	0
844	PFR_JS15-1_822	Haloacid dehalogenase superfamily enzyme,	946257	946964	+	PROKKA_00839	(S)-2-haloacid dehalogenase 4A	946257	946964	+	3.8.1.2	hdl IVa	similar to AA sequence:UniProtKB:Q51645		1	0	0	0	0	0	0
845	PFR_JS15-1_823	Valyl tRNA synthetase	947072	949690	-	PROKKA_00840	Valine--tRNA ligase	947072	949690	-	6.1.1.9	valS	similar to AA sequence:UniProtKB:P96142		1	0	0	0	0	0	0
846	PFR_JS15-1_824	DSBA-like thioredoxin domain protein	949789	950583	-	PROKKA_00841	hypothetical protein	949789	950583	-					0	0	0	0	0	0	0
847	PFR_JS15-1_825	DSBA oxidoreductase	950847	951641	-	PROKKA_00842	hypothetical protein	950847	951641	-					1	0	0	0	0	0	0
848	PFR_JS15-1_826	Putative type IV conjugative transfer system	951677	952288	-	PROKKA_00843	DoxX	951677	952288	-			protein motif:Pfam:PF07681.6		1	0	0	0	0	0	0
849	PFR_JS15-1_827	Protein FolC	952403	953908	+	PROKKA_00844	Folylpolyglutamate synthase	952403	953908	+	6.3.2.17	fgs	similar to AA sequence:UniProtKB:P15925		1	0	0	0	0	0	0
850	PFR_JS15-1_828	Nucleoside diphosphate kinase	954019	954495	+	PROKKA_00845	Nucleoside diphosphate kinase	954019	954495	+	2.7.4.6	ndkA	similar to AA sequence:UniProtKB:P84284		0	0	0	0	0	0	0
851	PFR_JS15-1_829	Hypothetical protein	954702	955832	+	PROKKA_00846	CAAX amino terminal protease self- immunity	954702	955832	+			protein motif:Pfam:PF02517.10		0	0	0	0	0	0	0
852	PFR_JS15-1_830	Radical SAM domain protein	955909	957852	+	PROKKA_00847	Radical SAM superfamily protein	955909	957852	+			protein motif:Pfam:PF04055.15		1	0	0	0	0	0	0
853	PFR_JS15-1_831	Ionic transporter membrane protein chaA	957916	959016	-	PROKKA_00848	Sodium/proton antiporter ChaA	957916	959016	-		chaA	similar to AA sequence:UniProtKB:P31801		1	0	0	0	0	0	0
854	PFR_JS15-1_832	Integral membrane protein TerC	959013	960269	-	PROKKA_00849	Inner membrane protein alx	959013	960269	-		alx_1	similar to AA sequence:UniProtKB:P42601		1	0	0	0	0	0	0
855	PFR_JS15-1_833	Hypothetical protein	960484	960939	+	PROKKA_00850	MarR family protein	960484	960939	+			protein motif:Pfam:PF12802.1		1	0	0	0	0	0	0
856	PFR_JS15-1_834	Radical SAM domain protein	961003	961755	+	PROKKA_00851	hypothetical protein	961003	961755	+					1	0	0	0	0	0	0
857	PFR_JS15-1_835	Hypothetical protein	962009	964795	+	PROKKA_00852	Ribonuclease G	962009	964795	+	3.1.26.-	rng	similar to AA sequence:UniProtKB:P0A9J0		1	0	0	0	0	0	0
858	PFR_JS15-1_836	50S ribosomal protein L21	964992	965339	+	PROKKA_00853	50S ribosomal protein L21	964992	965339	+		rplU	similar to AA sequence:UniProtKB:A0R151		1	0	0	0	0	0	0
859	PFR_JS15-1_837	50S ribosomal protein L27	965353	965616	+	PROKKA_00854	50S ribosomal protein L27	965353	965616	+		rpmA	similar to AA sequence:UniProtKB:A0R150		1	0	0	0	0	0	0
860	PFR_JS15-1_838	GTPase obg	965765	967366	+	PROKKA_00855	GTPase Obg	965765	967366	+		obg	similar to AA sequence:UniProtKB:P95722		1	0	0	0	0	0	0
861	PFR_JS15-1_839	Glutamate 5-kinase ProB	967359	968528	+	PROKKA_00856	Glutamate 5-kinase	967359	968528	+	2.7.2.11	proB	similar to AA sequence:UniProtKB:A0R148		1	0	0	0	0	0	0
862	PFR_JS15-1_840	Hypothetical protein	968561	969187	+	PROKKA_00857	hypothetical protein	968561	969187	+					1	0	0	0	0	0	0
863	PFR_JS15-1_841	Gamma-glutamyl phosphate reductase 2	969240	970481	+	PROKKA_00858	Gamma-glutamyl phosphate reductase	969240	970481	+	1.2.1.41	proA	similar to AA sequence:UniProtKB:Q9WYC9		1	0	0	0	0	0	0
864	PFR_JS15-1_842	Nicotinate (Nicotinamide) nucleotide	970555	971325	+	PROKKA_00859	Nicotinate-nucleotide adenylyltransferase	970555	971325	+	2.7.7.18	nadD	similar to AA sequence:UniProtKB:P54455		1	0	0	0	0	0	0
865	PFR_JS15-1_843	Ribosome-associated protein, iojap family	971322	971705	+	PROKKA_00860	Ribosomal silencing factor RsfS	971322	971705	+		rsfS	similar to AA sequence:UniProtKB:Q9KD89		1	0	0	0	0	0	0
866	PFR_JS15-1_844	Phosphoglycerate mutase family protein	971705	972313	+	PROKKA_00861	Glucosyl-3-phosphoglycerate phosphatase	971705	972313	+	3.1.3.-	gpgP_1	similar to AA sequence:UniProtKB:P71724		1	0	0	0	0	0	0
867	PFR_JS15-1_845	Hypothetical protein	972373	972810	+	PROKKA_00862	hypothetical protein	972373	972810	+					0	0	0	0	0	0	0
868	PFR_JS15-1_846	NADPH-dependent glutamate synthase beta chain and	972925	973845	+	PROKKA_00863	NAD dependent epimerase/dehydratase family protein	972925	973845	+			protein motif:Pfam:PF01370.15		1	0	0	0	0	0	0
869						PROKKA_00864	tRNA-Ala(ggc)	973972	974045	-			COORDINATES:profile:Aragorn:1.2		0					0	0
870	PFR_JS15-1_847	Hypothetical protein	974148	974888	-	PROKKA_00865	hypothetical protein	974148	974888	-					1	0	0	0	0	0	0
871	PFR_JS15-1_848	Hypothetical protein	975058	976116	+	PROKKA_00866	hypothetical protein	975058	976116	+					1	0	0	0	0	0	0
872	PFR_JS15-1_849	Leucine--tRNA ligase (Precursor)	976433	978961	+	PROKKA_00867	Leucine--tRNA ligase	976433	978961	+	6.1.1.4	leuS	similar to AA sequence:UniProtKB:Q9JXT2		1	0	0	0	0	0	0
873	PFR_JS15-1_850	Dihydroorotase	979018	980310	+	PROKKA_00868	Dihydroorotase	979018	980310	+	3.5.2.3	pyrC	similar to AA sequence:UniProtKB:Q81WF0		1	0	0	0	0	0	0
874	PFR_JS15-1_851	Malic enzyme, NAD binding domain protein	980328	982082	+	PROKKA_00869	putative NAD-dependent malic enzyme 2	980328	982082	+	1.1.1.38	maeA	similar to AA sequence:UniProtKB:P45868		1	0	0	0	0	0	0
875	PFR_JS15-1_852	Putative competence protein ComEA	982267	983178	+	PROKKA_00870	ComE operon protein 1	982267	983178	+		comEA	similar to AA sequence:UniProtKB:P39694		1	0	0	0	0	0	0
876	PFR_JS15-1_853	DNA internalization competence protein	983297	985618	+	PROKKA_00871	ComEC family competence protein	983297	985618	+			protein motif:CLUSTERS:PRK11539		0	0	0	0	0	0	0
877	PFR_JS15-1_854	DNA polymerase III, delta subunit	985701	986699	+	PROKKA_00872	hypothetical protein	985701	986699	+			protein motif:CLUSTERS:PRK07914		1	0	0	0	0	0	0
878	PFR_JS15-1_855	Hypothetical protein	986713	987375	-	PROKKA_00873	hypothetical protein	986713	987375	-					1	0	0	0	0	0	0
879	PFR_JS15-1_856	30S ribosomal protein S20	987509	987769	-	PROKKA_00874	30S ribosomal protein S20	987509	987769	-		rpsT	similar to AA sequence:UniProtKB:A0R102		1	0	0	0	0	0	0
880	PFR_JS15-1_857	Hypothetical protein	988024	988644	+	PROKKA_00875	hypothetical protein	988024	988644	+					1	0	0	0	0	0	0
881	PFR_JS15-1_858	Elongation factor 4	988945	990774	+	PROKKA_00876	Elongation factor 4	988945	990774	+	3.6.5.-	lepA	similar to AA sequence:UniProtKB:Q2FXY7		1	0	0	0	0	0	0
882	PFR_JS15-1_859	Putative coproporphyrinogen dehydrogenase	990777	991976	+	PROKKA_00877	Oxygen-independent coproporphyrinogen-III oxidase 1	990777	991976	+	1.3.99.22	hemN	similar to AA sequence:UniProtKB:P54304		1	0	0	0	0	0	0
883	PFR_JS15-1_860	PF11296 family protein	992071	992952	+	PROKKA_00878	hypothetical protein	992071	992952	+					1	0	0	0	0	0	0
884	PFR_JS15-1_861	Inositol monophosphatase family protein	993030	993806	+	PROKKA_00879	Inositol-1-monophosphatase	993030	993806	+	3.1.3.25	suhB	similar to AA sequence:UniProtKB:O33832		1	0	0	0	0	0	0
885	PFR_JS15-1_862	Heat-inducible transcription repressor hrcA	994064	995074	+	PROKKA_00880	Heat-inducible transcription repressor HrcA	994064	995074	+		hrcA	similar to AA sequence:UniProtKB:A0R0T9		1	0	0	0	0	0	0
886	PFR_JS15-1_863	Chaperone protein DnaJ 2	995087	996295	+	PROKKA_00881	Chaperone protein DnaJ	995087	996295	+		dnaJ_2	similar to AA sequence:UniProtKB:Q6RSN5		1	0	0	0	0	0	0
887	PFR_JS15-1_864	Ribosomal RNA small subunit methyltransferase E	996292	997041	+	PROKKA_00882	Ribosomal RNA small subunit methyltransferase E	996292	997041	+	2.1.1.193	rsmE	similar to AA sequence:UniProtKB:P0AGL7		1	0	0	0	0	0	0
888	PFR_JS15-1_865	Putative Tat (Twin-arginine translocation)	997030	998358	-	PROKKA_00883	Calcineurin-like phosphoesterase	997030	998358	-			protein motif:Pfam:PF00149.22		1	0	0	0	0	0	0
889	PFR_JS15-1_866	TRNA-guanine transglycosylase	998478	999746	+	PROKKA_00884	Queuine tRNA-ribosyltransferase	998478	999746	+	2.4.2.29	tgt	similar to AA sequence:UniProtKB:P66905		1	0	0	0	0	0	0
890	PFR_JS15-1_867	Hypothetical protein	999859	1000410	+	PROKKA_00885	hypothetical protein	999859	1000410	+					1	0	0	0	0	0	0
891	PFR_JS15-1_868	Prolyl aminopeptidase	1000492	1001550	+	PROKKA_00886	Proline iminopeptidase	1000492	1001550	+	3.4.11.5	pip_1	similar to AA sequence:UniProtKB:P52279		1	0	0	0	0	0	0
892	PFR_JS15-1_869	Hypothetical protein	1001606	1002097	+	PROKKA_00887	hypothetical protein	1001606	1002097	+					0	0	0	0	0	0	0
893	PFR_JS15-1_870	Inner membrane metabolite transport protein YhjE	1002266	1003648	+	PROKKA_00888	Inner membrane metabolite transport protein YhjE	1002266	1003648	+		yhjE	similar to AA sequence:UniProtKB:P37643		1	0	0	0	0	0	0
894	PFR_JS15-1_871	PhoH family protein	1003780	1004787	+	PROKKA_00889	PhoH-like protein	1003780	1004787	+		ybeZ	similar to AA sequence:UniProtKB:P0A9K3		1	0	0	0	0	0	0
895	PFR_JS15-1_872	Probable rRNA maturation factor	1004834	1005292	+	PROKKA_00890	Endoribonuclease YbeY	1004834	1005292	+	3.1.-.-	ybeY	similar to AA sequence:UniProtKB:A0R0T0		1	0	0	0	0	0	0
896	PFR_JS15-1_873	CBS domain pair protein	1005446	1006750	+	PROKKA_00891	Magnesium and cobalt efflux protein CorC	1005446	1006750	+		corC	similar to AA sequence:UniProtKB:P0A2L3		1	0	0	0	0	0	0
897	PFR_JS15-1_874	GTPase Era	1006743	1007687	+	PROKKA_00892	GTPase Era	1006743	1007687	+		era	similar to AA sequence:UniProtKB:P0A562		1	0	0	0	0	0	0
898	PFR_JS15-1_875	Hypothetical protein	1007737	1008204	+	PROKKA_00893	hypothetical protein	1007737	1008204	+					0	0	0	0	0	0	0
899	PFR_JS15-1_876	Hypothetical protein	1008201	1008344	+	PROKKA_00894	hypothetical protein	1008201	1008344	+					1	0	0	0	0	0	0
900	PFR_JS15-1_877	Hypothetical protein	1008455	1008589	+	PROKKA_00895	hypothetical protein	1008455	1008589	+					1	0	0	0	0	0	0
901	PFR_JS15-1_878	Uma4 protein	1008771	1009844	-	PROKKA_00896	Transposase	1008771	1009844	-			protein motif:Pfam:PF01610.11		0	0	0	0	0	0	0			Hypothetical protein absent from the other genome
902	PFR_JS15-1_879	Hypothetical protein	1010396	1011376	+	PROKKA_00897	EcsC protein family protein	1010396	1011376	+			protein motif:Pfam:PF12787.1		0	0	0	0	0	0	0			Transposase absent from the other genome
903	PFR_JS15-1_880	Amidohydrolase family protein	1011928	1013415	-	PROKKA_00898	N-substituted formamide deformylase precursor	1011928	1013415	-	3.5.1.91	nfdA	similar to AA sequence:UniProtKB:Q68AP4		0	0	0	0	0	0	0
904	PFR_JS15-1_881	2-isopropylmalate synthase LeuA	1013647	1015413	+	PROKKA_00899	2-isopropylmalate synthase	1013647	1015413	+	2.3.3.13	leuA_1	similar to AA sequence:UniProtKB:P96420		1	0	0	0	0	0	0
905	PFR_JS15-1_882	Protein of hypothetical function DUF488	1015528	1015890	-	PROKKA_00900	hypothetical protein	1015528	1015890	-					1	0	0	0	0	0	0
906	PFR_JS15-1_883	Isoprenyl transferase 2	1015951	1016640	-	PROKKA_00901	Trans,polycis-polyprenyl diphosphate synthase ((2Z,6E)-farnesyl diphosphate specific)	1015951	1016640	-	2.5.1.88		similar to AA sequence:UniProtKB:Q47RM6		1	0	0	0	0	0	0
907	PFR_JS15-1_884	DNA repair protein RecO	1016824	1017567	+	PROKKA_00902	DNA repair protein RecO	1016824	1017567	+		recO	similar to AA sequence:UniProtKB:P42095		1	0	0	0	0	0	0
908	PFR_JS15-1_885	Transcriptional regulator	1017731	1018924	+	PROKKA_00903	putative histidine kinase sensor domain protein	1017731	1018924	+			protein motif:Pfam:PF10114.3		0	0	0	0	0	0	0
909	PFR_JS15-1_886	Hypothetical protein	1018924	1019151	+	PROKKA_00904	Arabinose operon regulatory protein	1018924	1019151	+		araC	similar to AA sequence:UniProtKB:P0A9E0		0	0	0	0	0	0	0
910	PFR_JS15-1_887	PduQ	1019108	1020238	+	PROKKA_00905	NAD-dependent methanol dehydrogenase	1019108	1020238	+	1.1.1.244	mdh_2	similar to AA sequence:UniProtKB:P31005		0	0	0	0	0	0	0
911	PFR_JS15-1_888	Ethanolamine utilization protein, EutP	1020291	1020716	-	PROKKA_00906	Propanediol utilization protein PduV	1020291	1020716	-		pduV	similar to AA sequence:UniProtKB:Q9XDM6		0	0	0	0	0	0	0
912	PFR_JS15-1_889	PduU protein	1020713	1021054	-	PROKKA_00907	Propanediol utilization protein PduU	1020713	1021054	-		pduU	similar to AA sequence:UniProtKB:P0A1D1		0	0	0	0	0	0	0
913	PFR_JS15-1_890	Carbon dioxide concentrating	1021381	1021665	+	PROKKA_00908	Propanediol utilization protein PduA	1021381	1021665	+		pduA_1	similar to AA sequence:UniProtKB:P0A1C7		0	0	0	0	0	0	0
914	PFR_JS15-1_891	Propanediol utilization protein PduB	1021680	1022489	+	PROKKA_00909	Propanediol utilization protein PduB	1021680	1022489	+		pduB	similar to AA sequence:UniProtKB:P37449		0	0	0	0	0	0	0
915	PFR_JS15-1_892	Glycerol dehydratase large subunit	1022504	1024165	+	PROKKA_00910	Glycerol dehydratase large subunit	1022504	1024165	+	4.2.1.30	dhaB	similar to AA sequence:UniProtKB:P45514		0	0	0	0	0	0	0
916	PFR_JS15-1_893	Propanediol dehydratase medium subunit	1024176	1024859	+	PROKKA_00911	Propanediol dehydratase medium subunit	1024176	1024859	+	4.2.1.28	pduD	similar to AA sequence:UniProtKB:O31041		0	0	0	0	0	0	0
917	PFR_JS15-1_894	Dehydratase small subunit	1024868	1025401	+	PROKKA_00912	Propanediol dehydratase small subunit	1024868	1025401	+	4.2.1.28	pduE	similar to AA sequence:UniProtKB:O31042		0	0	0	0	0	0	0
918	PFR_JS15-1_895	Putative dioal dehydratase-reactivating factor,	1025437	1027251	+	PROKKA_00913	Diol dehydratase-reactivating factor alpha subunit	1025437	1027251	+		ddrA	similar to AA sequence:UniProtKB:O68195		0	0	0	0	0	0	0
919	PFR_JS15-1_896	Glycerol dehydratase reactivation factor DhaG	1027248	1027592	+	PROKKA_00914	hypothetical protein	1027248	1027592	+					0	0	0	0	0	0	0
920	PFR_JS15-1_897	Propanediol utilization protein PduK	1027609	1028226	+	PROKKA_00915	hypothetical protein	1027609	1028226	+			similar to AA sequence:UniProtKB:P72761	Carbon dioxide-concentrating mechanism protein CcmK homolog 2	0	0	0	0	0	0	0
921	PFR_JS15-1_898	Propanediol utilization protein PduJ	1028271	1028549	+	PROKKA_00916	Propanediol utilization protein PduA	1028271	1028549	+		pduA_2	similar to AA sequence:UniProtKB:P0A1C7		0	0	0	0	0	0	0
922	PFR_JS15-1_899	Ethanolamine utilization protein EutJ	1028696	1029553	+	PROKKA_00917	Chaperone protein DnaK	1028696	1029553	+		dnaK_2	similar to AA sequence:UniProtKB:B7J282		0	0	0	0	0	0	0
923	PFR_JS15-1_900	Ethanolamine utilization flavoprotein	1029550	1030434	+	PROKKA_00918	Flavoprotein	1029550	1030434	+			protein motif:Pfam:PF02441.13		0	0	0	0	0	0	0
924	PFR_JS15-1_901	Propanediol utilization protein PduN	1030436	1030708	+	PROKKA_00919	Carbon dioxide concentrating mechanism protein CcmL	1030436	1030708	+		ccmL	similar to AA sequence:UniProtKB:P72759		0	0	0	0	0	0	0
925	PFR_JS15-1_902	PduO	1030711	1031796	+	PROKKA_00920	Cob(I)yrinic acid a,c-diamide adenosyltransferase	1030711	1031796	+	2.5.1.17	yvqK	similar to AA sequence:UniProtKB:O34899		0	0	0	0	0	0	0
926	PFR_JS15-1_903	CoA-dependent propionaldehyde dehydrogenase	1031793	1033202	+	PROKKA_00921	Aldehyde-alcohol dehydrogenase	1031793	1033202	+		adhE	similar to AA sequence:UniProtKB:P0A9Q7		0	0	0	0	0	0	0
927	PFR_JS15-1_904	Phage integrase	1033416	1034090	-	PROKKA_00922	hypothetical protein	1033416	1034090	-					1	0	0	0	0	0	0
928	PFR_JS15-1_905	Fe(3 ) uptake regulation protein	1034343	1034855	-	PROKKA_00923	Zinc uptake regulation protein	1034343	1034855	-		zur	similar to AA sequence:UniProtKB:O05839		1	0	0	0	0	0	0
929	PFR_JS15-1_906	Metal transport ABC transporter	1034821	1035828	-	PROKKA_00924	High-affinity zinc uptake system membrane protein ZnuB	1034821	1035828	-		znuB	similar to AA sequence:UniProtKB:O34610		1	0	0	0	0	0	0
930	PFR_JS15-1_907	Metal transport ABC transporter	1035830	1036618	-	PROKKA_00925	High-affinity zinc uptake system ATP-binding protein ZnuC	1035830	1036618	-	3.6.3.-	znuC	similar to AA sequence:UniProtKB:O34946		1	0	0	0	0	0	0
931	PFR_JS15-1_908	Metal transport system ABC transporter	1036713	1037660	-	PROKKA_00926	High-affinity zinc uptake system binding-protein ZnuA precursor	1036713	1037660	-		znuA	similar to AA sequence:UniProtKB:O34966		1	0	0	0	0	0	0
932	PFR_JS15-1_909	Glycyl-tRNA synthetase glyS	1037893	1039281	+	PROKKA_00927	Glycine--tRNA ligase	1037893	1039281	+	6.1.1.14	glyQS	similar to AA sequence:UniProtKB:P99129		1	0	0	0	0	0	0
933	PFR_JS15-1_910	Nicotinate-nucleotide pyrophosphatase nadC	1039406	1040326	-	PROKKA_00928	Nicotinate-nucleotide pyrophosphorylase [carboxylating]	1039406	1040326	-	2.4.2.19	nadC	similar to AA sequence:UniProtKB:O06594		1	0	0	0	0	0	0
934	PFR_JS15-1_911	L-aspartate oxidase NadB	1040323	1042005	-	PROKKA_00929	L-aspartate oxidase	1040323	1042005	-	1.4.3.16	nadB_1	similar to AA sequence:UniProtKB:P10902		1	0	0	0	0	0	0
935	PFR_JS15-1_912	Quinolinate synthase A	1042002	1042982	-	PROKKA_00930	Quinolinate synthase A	1042002	1042982	-	2.5.1.72	nadA	similar to AA sequence:UniProtKB:P11458		1	0	0	0	0	0	0
936	PFR_JS15-1_913	NUDIX hydrolase	1043049	1043801	+	PROKKA_00931	NUDIX domain protein	1043049	1043801	+			protein motif:Pfam:PF00293.1		1	0	0	0	0	0	0
937	PFR_JS15-1_914	Succinate dehydrogenase cytochrome B subunit,	1044049	1044804	+	PROKKA_00932	Succinate dehydrogenase/Fumarate reductase transmembrane subunit	1044049	1044804	+			protein motif:Pfam:PF01127.16		1	0	0	0	0	0	0
938	PFR_JS15-1_915	Succinate dehydrogenase flavoprotein subunit	1044801	1046885	+	PROKKA_00933	Fumarate reductase flavoprotein subunit	1044801	1046885	+	1.3.5.4	frdA_1	similar to AA sequence:UniProtKB:P17412		1	0	0	0	0	0	0
939	PFR_JS15-1_916	Succinate dehydrogenase/fumarate reductase	1046882	1047640	+	PROKKA_00934	Fumarate reductase iron-sulfur subunit	1046882	1047640	+	1.3.99.1	frdB_1	similar to AA sequence:UniProtKB:P0AC47		1	0	0	0	0	0	0
940	PFR_JS15-1_917	TIM-barrel protein, nifR3 family	1047717	1048904	+	PROKKA_00935	tRNA-dihydrouridine synthase C	1047717	1048904	+	1.-.-.-	dusC	similar to AA sequence:UniProtKB:P33371		1	0	0	0	0	0	0
941	PFR_JS15-1_918	Putative dGTPase	1048955	1050100	+	PROKKA_00936	Deoxyguanosinetriphosphate triphosphohydrolase	1048955	1050100	+	3.1.5.1	dgt	similar to AA sequence:UniProtKB:Q59827		1	0	0	0	0	0	0
942	PFR_JS15-1_919	TIGR00245 family protein	1050117	1050875	-	PROKKA_00937	hypothetical protein	1050117	1050875	-					0	0	0	0	0	0	0
943	PFR_JS15-1_920	Predicted metal-binding protein (DUF2284)	1050883	1051524	-	PROKKA_00938	hypothetical protein	1050883	1051524	-					1	0	0	0	0	0	0
944	PFR_JS15-1_921	Mercuric reductase/transcriptional regulator,	1051933	1053363	+	PROKKA_00939	Dihydrolipoyl dehydrogenase	1051933	1053363	+	1.8.1.4	lpd	similar to AA sequence:UniProtKB:P85207		1	0	0	0	0	0	0
945	PFR_JS15-1_922	HAD-superfamily hydrolase, subfamily IIB	1053384	1054226	-	PROKKA_00940	Putative phosphatase	1053384	1054226	-	3.1.3.-		similar to AA sequence:UniProtKB:Q5XD45		1	0	0	0	0	0	0
946	PFR_JS15-1_923	Hypothetical protein	1054234	1055160	-	PROKKA_00941	hypothetical protein	1054234	1055160	-					1	0	0	0	0	0	0
947	PFR_JS15-1_924	Transcriptional regulator moxR1	1055405	1056457	+	PROKKA_00942	ATPase family associated with various cellular activities (AAA)	1055405	1056457	+			protein motif:Pfam:PF07726.5		1	0	0	0	0	0	0
948	PFR_JS15-1_925	Protein containing DUF58	1056454	1057518	+	PROKKA_00943	hypothetical protein	1056454	1057518	+					1	0	0	0	0	0	0
949	PFR_JS15-1_926	Von Willebrand factor type A domain protein	1057518	1058492	+	PROKKA_00944	von Willebrand factor type A domain protein	1057518	1058492	+			protein motif:Pfam:PF00092.22		1	0	0	0	0	0	0
950	PFR_JS15-1_927	Von Willebrand factor type A domain protein	1058492	1059457	+	PROKKA_00945	von Willebrand factor type A domain protein	1058492	1059457	+			protein motif:Pfam:PF00092.22		1	0	0	0	0	0	0
951	PFR_JS15-1_928	Pyridoxal phosphate enzyme, YggS family	1059454	1060206	+	PROKKA_00946	hypothetical protein	1059454	1060206	+			protein motif:Pfam:PF01168.14	Alanine racemase, N-terminal domain	1	0	0	0	0	0	0
952	PFR_JS15-1_929	Peptidase, S9C (Acylaminoacyl-peptidase) family	1060255	1062234	-	PROKKA_00947	Prolyl tripeptidyl peptidase precursor	1060255	1062234	-	3.4.14.12	ptpA_2	similar to AA sequence:UniProtKB:Q7MUW6		1	0	0	0	0	0	0
953	PFR_JS15-1_930	PF11343 family protein	1062385	1062879	+	PROKKA_00948	hypothetical protein	1062385	1062879	+					1	0	0	0	0	0	0
954	PFR_JS15-1_931	3-oxoacyl-[acyl-carrier-protein] synthase II	1063063	1064322	-	PROKKA_00949	3-oxoacyl-[acyl-carrier-protein] synthase 2	1063063	1064322	-	2.3.1.179	fabF	similar to AA sequence:UniProtKB:P73283		1	0	0	0	0	0	0
955	PFR_JS15-1_932	Acyl carrier protein	1064374	1064625	-	PROKKA_00950	Acyl carrier protein	1064374	1064625	-		acpP	similar to AA sequence:UniProtKB:P80921		1	0	0	0	0	0	0
956	PFR_JS15-1_933	3-oxoacyl-[acyl-carrier-protein] synthase 3 2	1064687	1065691	-	PROKKA_00951	3-oxoacyl-[acyl-carrier-protein] synthase 3	1064687	1065691	-	2.3.1.180	fabH	similar to AA sequence:UniProtKB:Q9F6D4		1	0	0	0	0	0	0
957	PFR_JS15-1_934	Malonyl CoA:acyl carrier protein	1065695	1066651	-	PROKKA_00952	Malonyl CoA-acyl carrier protein transacylase	1065695	1066651	-	2.3.1.39	fabD	similar to AA sequence:UniProtKB:P63458		1	0	0	0	0	0	0
958	PFR_JS15-1_935	Transcriptional regulator, PucR family	1066841	1068022	-	PROKKA_00953	Purine catabolism regulatory protein	1066841	1068022	-		pucR_1	similar to AA sequence:UniProtKB:O32138		1	0	0	0	0	0	0
959	PFR_JS15-1_936	Aromatic-amino-acid transaminase	1068108	1069304	-	PROKKA_00954	Aromatic-amino-acid aminotransferase	1068108	1069304	-	2.6.1.57	tyrB	similar to AA sequence:UniProtKB:P04693		1	0	0	0	0	0	0
960	PFR_JS15-1_937	Pyruvate dehydrogenase E1 component	1069559	1072306	+	PROKKA_00955	Pyruvate dehydrogenase E1 component	1069559	1072306	+	1.2.4.1	aceE	similar to AA sequence:UniProtKB:A0R0B0		1	0	0	0	0	0	0
961	PFR_JS15-1_938	Hypothetical protein	1072269	1072403	+	PROKKA_00956	hypothetical protein	1072269	1072403	+					0	0	0	0	0	0	0
962	PFR_JS15-1_939	PF11253 family protein	1072408	1072833	+	PROKKA_00957	hypothetical protein	1072408	1072833	+					1	0	0	0	0	0	0
963	PFR_JS15-1_940	Putative ABC transport system	1072868	1074661	-	PROKKA_00958	putative ABC transporter ATP-binding protein	1072868	1074661	-			similar to AA sequence:UniProtKB:Q9WYC4		1	0	0	0	0	0	0
964	PFR_JS15-1_941	Hsp20/alpha crystallin family protein	1074911	1075363	+	PROKKA_00959	18 kDa heat shock protein	1074911	1075363	+			similar to AA sequence:UniProtKB:Q53595		1	0	0	0	0	0	0
965	PFR_JS15-1_942	Putrescine importer	1075636	1077027	+	PROKKA_00960	Putrescine importer PuuP	1075636	1077027	+		puuP	similar to AA sequence:UniProtKB:P76037		1	0	0	0	0	0	0
966	PFR_JS15-1_943	Aliphatic amidase	1077024	1077884	+	PROKKA_00961	Aliphatic amidase	1077024	1077884	+	3.5.1.4	amiE	similar to AA sequence:UniProtKB:P11436		1	0	0	0	0	0	0
967	PFR_JS15-1_944	4-aminobutyrate aminotransferase gabT	1078063	1079400	-	PROKKA_00962	4-aminobutyrate aminotransferase PuuE	1078063	1079400	-	2.6.1.19	puuE	similar to AA sequence:UniProtKB:P50457		1	0	0	0	0	0	0
968	PFR_JS15-1_945	Fructosamine kinase	1079479	1080510	+	PROKKA_00963	Fructosamine kinase	1079479	1080510	+			protein motif:Pfam:PF03881.8		1	0	0	0	0	0	0
969						PROKKA_00964	tRNA-Val(tac)	1080583	1080658	-			COORDINATES:profile:Aragorn:1.2		0					0	0
970	PFR_JS15-1_946	YqeY family protein	1080699	1081160	-	PROKKA_00965	Yqey-like protein	1080699	1081160	-			protein motif:Pfam:PF09424.4		1	0	0	0	0	0	0
971	PFR_JS15-1_947	Peptide chain release factor 2	1081255	1082364	+	PROKKA_00966	Peptide chain release factor 2	1081255	1082364	+		prfB	similar to AA sequence:UniProtKB:A0QU58		1	0	0	0	0	0	0
972	PFR_JS15-1_948	Cell division ATP-binding protein FtsE	1082516	1083202	+	PROKKA_00967	Cell division ATP-binding protein FtsE	1082516	1083202	+		ftsE	similar to AA sequence:UniProtKB:O34814		1	0	0	0	0	0	0
973	PFR_JS15-1_949	Efflux ABC transporter, permease protein	1083241	1084158	+	PROKKA_00968	Cell division protein FtsX	1083241	1084158	+		ftsX	similar to AA sequence:UniProtKB:A5U7B6		1	0	0	0	0	0	0
974	PFR_JS15-1_950	Hypothetical protein	1084225	1085544	+	PROKKA_00969	Murein DD-endopeptidase MepM	1084225	1085544	+	3.4.24.-	mepM_1	similar to AA sequence:UniProtKB:P0AFS9		1	0	0	0	0	0	0
975	PFR_JS15-1_951	MutG family lantibiotic protection ABC	1085728	1087680	+	PROKKA_00970	hypothetical protein	1085728	1087680	+					1	0	0	0	0	0	0
976	PFR_JS15-1_952	TmRNA-binding protein SmpB	1087831	1088313	+	PROKKA_00971	SsrA-binding protein	1087831	1088313	+		smpB	similar to AA sequence:UniProtKB:A0QU63		1	0	0	0	0	0	0
977	PFR_JS15-1_953	Hypothetical protein	1088403	1089044	+	PROKKA_00972	hypothetical protein	1088403	1089044	+					1	0	0	0	0	0	0
978						PROKKA_00973	transfer-messenger RNA, SsrA	1089169	1089536	+		ssrA	COORDINATES:profile:Aragorn:1.2		0					0	0
979	PFR_JS15-1_954	Conserved protein, DUF179	1089750	1090316	+	PROKKA_00974	hypothetical protein	1089750	1090316	+			protein motif:CLUSTERS:PRK00228		1	0	0	0	0	0	0
980	PFR_JS15-1_955	DNA-binding response regulator MtrA	1090452	1091192	+	PROKKA_00975	DNA-binding response regulator MtrA	1090452	1091192	+		mtrA	similar to AA sequence:UniProtKB:P0A5Z4		1	0	0	0	0	0	0
981	PFR_JS15-1_956	Phosphoribosyl transferase domain protein	1091274	1092083	+	PROKKA_00976	DNA utilization protein GntX	1091274	1092083	+			protein motif:CLUSTERS:PRK11595		1	0	0	0	0	0	0
982	PFR_JS15-1_957	Putative ribosomal S30AE, sigma 54 modulation	1092239	1092835	+	PROKKA_00977	Light-repressed protein A	1092239	1092835	+		lrtA	similar to AA sequence:UniProtKB:P47908		1	0	0	0	0	0	0
983	PFR_JS15-1_958	Protein translocase subunit SecA	1093080	1095929	+	PROKKA_00978	preprotein translocase subunit SecA	1093080	1095929	+			protein motif:CLUSTERS:PRK12904		1	0	0	0	0	0	0
984	PFR_JS15-1_959	Hypothetical protein	1095969	1096511	-	PROKKA_00979	hypothetical protein	1095969	1096511	-					1	0	0	0	0	0	0
985	PFR_JS15-1_960	Hypothetical protein	1096592	1097101	+	PROKKA_00980	hypothetical protein	1096592	1097101	+					0	0	0	0	0	0	0
986	PFR_JS15-1_961	Hypothetical protein	1097103	1097306	+	PROKKA_00981	hypothetical protein	1097103	1097306	+					1	0	0	0	0	0	0
987	PFR_JS15-1_962	Hypothetical protein	1097228	1097389	-	PROKKA_00982	hypothetical protein	1097228	1097389	-					0	0	0	0	0	0	0
988	PFR_JS15-1_963	Hypothetical protein	1097365	1097841	-	PROKKA_00983	hypothetical protein	1097365	1097841	-					1	0	0	0	0	0	0
989	PFR_JS15-1_964	PHP domain protein	1097973	1098854	+	PROKKA_00984	hypothetical protein	1097973	1098854	+			protein motif:CLUSTERS:PRK06361		1	0	0	0	0	0	0
990	PFR_JS15-1_965	Tryptophanyl-tRNA synthetase II	1098823	1099995	+	PROKKA_00985	Tryptophan--tRNA ligase 2	1098823	1099995	+	6.1.1.2	trpS2	similar to AA sequence:UniProtKB:Q9RVD6		1	0	0	0	0	0	0
991	PFR_JS15-1_966	DEAD/DEAH box helicase	1100133	1101638	-	PROKKA_00986	DEAD-box ATP-dependent RNA helicase CshA	1100133	1101638	-	3.6.4.13	cshA	similar to AA sequence:UniProtKB:P96614		1	0	0	0	0	0	0
992	PFR_JS15-1_967	Hydroxylase for synthesis of	1101914	1102669	+	PROKKA_00987	hypothetical protein	1101914	1102669	+					1	0	0	0	0	0	0
993	PFR_JS15-1_968	Hypothetical protein	1102856	1103140	-	PROKKA_00988	hypothetical protein	1102856	1103140	-					1	0	0	0	0	0	0
994	PFR_JS15-1_969	Serine/threonine phosphatase stp	1103197	1104069	-	PROKKA_00989	Serine/threonine phosphatase stp	1103197	1104069	-	3.1.3.16	stp_1	similar to AA sequence:UniProtKB:Q8Y678		1	0	0	0	0	0	0
995	PFR_JS15-1_970	Cold shock-like protein CspA	1104235	1104441	-	PROKKA_00990	Cold shock-like protein 7.0	1104235	1104441	-			similar to AA sequence:UniProtKB:Q01761		1	0	0	0	0	0	0
996	PFR_JS15-1_971	ATP-dependent DNA helicase	1104781	1108152	+	PROKKA_00991	ATP-dependent DNA helicase UvrD1	1104781	1108152	+	3.6.4.12	uvrD1_2	similar to AA sequence:UniProtKB:P0A5A3		1	0	0	0	0	0	0
997	PFR_JS15-1_972	ATP-dependent DNA helicase	1108149	1111505	+	PROKKA_00992	ATP-dependent DNA helicase PcrA	1108149	1111505	+	3.6.4.12	pcrA	similar to AA sequence:UniProtKB:P56255		1	0	0	0	0	0	0
998	PFR_JS15-1_973	Hydrolase, NUDIX family	1111515	1112405	+	PROKKA_00993	NADH pyrophosphatase	1111515	1112405	+	3.6.1.22	nudC	similar to AA sequence:UniProtKB:P32664		1	0	0	0	0	0	0
999	PFR_JS15-1_974	Exonuclease subunit V alpha recD	1112457	1114310	-	PROKKA_00994	RecBCD enzyme subunit RecD	1112457	1114310	-	3.1.11.5	recD	similar to AA sequence:UniProtKB:P04993		1	0	0	0	0	0	0
1000	PFR_JS15-1_975	Putative exodeoxyribonuclease V, beta subunit	1114297	1117659	-	PROKKA_00995	RecBCD enzyme subunit RecB	1114297	1117659	-	3.1.11.5	recB	similar to AA sequence:UniProtKB:P08394		1	0	0	0	0	0	0
1001	PFR_JS15-1_976	Exonuclease subunit V gamma recC	1117656	1121030	-	PROKKA_00996	RecBCD enzyme subunit RecC	1117656	1121030	-	3.1.11.5	recC	similar to AA sequence:UniProtKB:P07648		1	0	0	0	0	0	0
1002	PFR_JS15-1_977	HRDC domain protein	1121133	1123289	+	PROKKA_00997	ATP-dependent DNA helicase UvrD2	1121133	1123289	+	3.6.4.12	uvrD2	similar to AA sequence:UniProtKB:P64320		1	0	0	0	0	0	0
1003	PFR_JS15-1_978	Hypothetical protein	1123346	1124473	-	PROKKA_00998	hypothetical protein	1123346	1124473	-					1	0	0	0	0	0	0
1004	PFR_JS15-1_979	Hypothetical protein	1124630	1124791	-	PROKKA_00999	hypothetical protein	1124630	1124791	-					1	0	0	0	0	0	0
1005	PFR_JS15-1_980	Similar to metal-dependent hydrolase	1125228	1125875	+	PROKKA_01000	hypothetical protein	1125228	1125875	+					1	0	0	0	0	0	0
1006	PFR_JS15-1_981	UbiD family decarboxylase	1125907	1127310	-	PROKKA_01001	hypothetical protein	1125907	1127310	-					1	0	0	0	0	0	0
1007	PFR_JS15-1_982	Lon protease proteolytic domain protein	1127551	1128594	+	PROKKA_01002	serine endoprotease	1127551	1128594	+			protein motif:CLUSTERS:PRK10942		1	0	0	0	0	0	0
1008	PFR_JS15-1_983	Hypothetical protein	1128713	1129312	+	PROKKA_01003	hypothetical protein	1128713	1129312	+					1	0	0	0	0	0	0
1009	PFR_JS15-1_984	UPF0182 protein	1129309	1132248	+	PROKKA_01004	hypothetical protein	1129309	1132248	+			protein motif:CLUSTERS:PRK00068		1	0	0	0	0	0	0
1010	PFR_JS15-1_985	Peptidase M16 inactive domain protein	1132332	1133696	-	PROKKA_01005	Peptidase M16 inactive domain protein	1132332	1133696	-			protein motif:Pfam:PF05193.15		1	0	0	0	0	0	0
1011	PFR_JS15-1_986	Peptidase M16 inactive domain protein	1133696	1134967	-	PROKKA_01006	Protease 3 precursor	1133696	1134967	-	3.4.24.55	ptrA	similar to AA sequence:UniProtKB:P05458		1	0	0	0	0	0	0
1012	PFR_JS15-1_987	Prolyl aminopeptidase	1135112	1136326	+	PROKKA_01007	Proline iminopeptidase	1135112	1136326	+	3.4.11.5	pip_2	similar to AA sequence:UniProtKB:P46547		1	0	0	0	0	0	0
1013	PFR_JS15-1_988	Hypothetical protein	1136493	1136783	+	PROKKA_01008	hypothetical protein	1136493	1136783	+					1	0	0	0	0	0	0
1014	PFR_JS15-1_989	Biotin synthase	1136946	1138091	+	PROKKA_01009	Biotin synthase	1136946	1138091	+	2.8.1.6	bioB	similar to AA sequence:UniProtKB:P19206		1	0	0	0	0	0	0
1015						PROKKA_01010	tRNA-Met(cat)	1138176	1138250	-			COORDINATES:profile:Aragorn:1.2		0					0	0
1016	PFR_JS15-1_990	ABC transporter, substrate-binding protein,	1138459	1139982	+	PROKKA_01011	Glutathione-binding protein GsiB precursor	1138459	1139982	+		gsiB	similar to AA sequence:UniProtKB:P75797		1	0	0	0	0	0	0
1017	PFR_JS15-1_991	Putative glutathione ABC transporter, permease	1140004	1140957	+	PROKKA_01012	Glutathione transport system permease protein GsiC	1140004	1140957	+		gsiC	similar to AA sequence:UniProtKB:P75798		1	0	0	0	0	0	0
1018	PFR_JS15-1_992	Putative oligopeptide ABC transport system	1140954	1141769	+	PROKKA_01013	Glutathione transport system permease protein GsiD	1140954	1141769	+		gsiD	similar to AA sequence:UniProtKB:P75799		1	0	0	0	0	0	0
1019	PFR_JS15-1_993	Oligopeptide transport protein of the ABC	1141771	1142628	+	PROKKA_01014	Oligopeptide transport ATP-binding protein OppD	1141771	1142628	+		oppD	similar to AA sequence:UniProtKB:P24136		1	0	0	0	0	0	0
1020	PFR_JS15-1_994	Dipeptide ABC transporter ATP-binding protein	1142621	1143448	+	PROKKA_01015	Glutathione import ATP-binding protein GsiA	1142621	1143448	+	3.6.3.-	gsiA_2	similar to AA sequence:UniProtKB:P75796		1	0	0	0	0	0	0
1021	PFR_JS15-1_995	Putative phosphoglycerate dehydrogenase	1143482	1144702	+	PROKKA_01016	D-3-phosphoglycerate dehydrogenase	1143482	1144702	+	1.1.1.95	serA	similar to AA sequence:UniProtKB:P0A9T0		1	0	0	0	0	0	0
1022	PFR_JS15-1_996	Dolichyl-phosphate mannose synthase	1144692	1145348	-	PROKKA_01017	GtrA-like protein	1144692	1145348	-			protein motif:Pfam:PF04138.8		0	0	0	0	0	0	0
1023	PFR_JS15-1_997	Glycosyltransferase, family 2	1145302	1145850	-	PROKKA_01018	Glycosyl transferase family 2	1145302	1145850	-			protein motif:Pfam:PF00535.20		0	0	0	0	0	0	0
1024	PFR_JS15-1_998	Exopolysaccharide biosynthesis protein related to	1145860	1146807	-	PROKKA_01019	hypothetical protein	1145860	1146807	-					1	0	0	0	0	0	0
1025	PFR_JS15-1_999	Conserved domain protein	1146964	1147599	+	PROKKA_01020	hypothetical protein	1146964	1147599	+					1	0	0	0	0	0	0
1026	PFR_JS15-1_1000	VTC domain protein	1147596	1148408	+	PROKKA_01021	VTC domain protein	1147596	1148408	+			protein motif:Pfam:PF09359.4		1	0	0	0	0	0	0
1027	PFR_JS15-1_1001	PF14262 domain protein	1148405	1150138	+	PROKKA_01022	hypothetical protein	1148405	1150138	+					1	0	0	0	0	0	0
1028	PFR_JS15-1_1002	Putative histidinol-phosphate phosphatase,	1150192	1151007	-	PROKKA_01023	Histidinol-phosphatase	1150192	1151007	-	3.1.3.15	hisN	similar to AA sequence:UniProtKB:Q9K4B1		1	0	0	0	0	0	0
1029	PFR_JS15-1_1003	Putative ribosome biogenesis GTPase RsgA	1151061	1152131	-	PROKKA_01024	Putative ribosome biogenesis GTPase RsgA	1151061	1152131	-	3.6.1.-	rsgA	similar to AA sequence:UniProtKB:Q8ZKB0		1	0	0	0	0	0	0
1030	PFR_JS15-1_1004	3-phosphoshikimate 1-carboxyvinyltransferase	1152128	1153480	-	PROKKA_01025	3-phosphoshikimate 1-carboxyvinyltransferase	1152128	1153480	-	2.5.1.19	aroA	similar to AA sequence:UniProtKB:P22487		1	0	0	0	0	0	0
1031	PFR_JS15-1_1005	UPF0361 protein yoqW	1153628	1154380	+	PROKKA_01026	Putative SOS response-associated peptidase YedK	1153628	1154380	+	3.4.-.-	yedK	similar to AA sequence:UniProtKB:P76318		1	0	0	0	0	0	0
1032	PFR_JS15-1_1006	RNA polymerase sigma factor	1154521	1155108	+	PROKKA_01027	ECF RNA polymerase sigma factor SigR	1154521	1155108	+		sigR	similar to AA sequence:UniProtKB:Q7AKG9		1	0	0	0	0	0	0
1033	PFR_JS15-1_1007	Hypothetical protein	1155101	1155412	+	PROKKA_01028	Anti-sigma factor RsrA	1155101	1155412	+		rsrA	similar to AA sequence:UniProtKB:Q7AKG8		1	0	0	0	0	0	0
1034	PFR_JS15-1_1008	Sensor histidine kinase	1155898	1157406	+	PROKKA_01029	putative sensor histidine kinase pdtaS	1155898	1157406	+	2.7.13.3	pdtaS	similar to AA sequence:UniProtKB:O05846		1	0	0	0	0	0	0
1035	PFR_JS15-1_1009	Transcription factor WhiB	1157511	1157759	-	PROKKA_01030	Transcriptional regulator WhiB1	1157511	1157759	-		whiB1	similar to AA sequence:UniProtKB:O05847		1	0	0	0	0	0	0
1036	PFR_JS15-1_1010	Oxoglutarate dehydrogenase	1158004	1161789	-	PROKKA_01031	Multifunctional 2-oxoglutarate metabolism enzyme	1158004	1161789	-	2.2.1.5	kgd	similar to AA sequence:UniProtKB:A0R2B1		1	0	0	0	0	0	0
1037	PFR_JS15-1_1011	Hypothetical protein	1161859	1163265	-	PROKKA_01032	hypothetical protein	1161859	1163265	-					1	0	0	0	0	0	0
1038	PFR_JS15-1_1012	LigA	1163258	1164553	-	PROKKA_01033	hypothetical protein	1163258	1164553	-					1	0	0	0	0	0	0
1039	PFR_JS15-1_1013	LigA	1164694	1166112	-	PROKKA_01034	hypothetical protein	1164694	1166112	-					0	0	0	0	0	0	0
1040						PROKKA_01035	tRNA-Arg(ccg)	1167165	1167238	-			COORDINATES:profile:Aragorn:1.2		0					0	0
1041	PFR_JS15-1_1014	Diaminopimelate decarboxylase	1167377	1168771	+	PROKKA_01036	Diaminopimelate decarboxylase	1167377	1168771	+	4.1.1.20	lysA	similar to AA sequence:UniProtKB:P0A5M4		0	0	0	0	0	0	0
1042	PFR_JS15-1_1015	Homoserine dehydrogenase	1168782	1170107	+	PROKKA_01037	Homoserine dehydrogenase	1168782	1170107	+	1.1.1.3	hom	similar to AA sequence:UniProtKB:P08499		1	0	0	0	0	0	0
1043	PFR_JS15-1_1016	Phosphoserine phosphatase/homoserine	1170116	1170739	+	PROKKA_01038	haloacid dehalogenase-like hydrolase	1170116	1170739	+			protein motif:Pfam:PF12710.1		1	0	0	0	0	0	0
1044	PFR_JS15-1_1017	Transcription termination factor Rho	1171133	1173103	+	PROKKA_01039	hypothetical protein	1171133	1173103	+			similar to AA sequence:UniProtKB:P52157	Transcription termination factor Rho	1	0	0	0	0	0	0
1045	PFR_JS15-1_1018	50S ribosomal protein L31	1173240	1173464	+	PROKKA_01040	50S ribosomal protein L31	1173240	1173464	+		rpmE	similar to AA sequence:UniProtKB:Q9K4E5		1	0	0	0	0	0	0
1046	PFR_JS15-1_1019	Peptide chain release factor 1	1173572	1174651	+	PROKKA_01041	Peptide chain release factor 1	1173572	1174651	+		prfA	similar to AA sequence:UniProtKB:P96077		1	0	0	0	0	0	0
1047	PFR_JS15-1_1020	Release factor glutamine methyltransferase	1174648	1175526	+	PROKKA_01042	Release factor glutamine methyltransferase	1174648	1175526	+	2.1.1.-	prmC	similar to AA sequence:UniProtKB:P0ACC1		1	0	0	0	0	0	0
1048	PFR_JS15-1_1021	TRNA threonylcarbamoyladenosine biosynthesis	1175523	1176401	+	PROKKA_01043	Threonylcarbamoyl-AMP synthase	1175523	1176401	+	2.7.7.87	ywlC_1	similar to AA sequence:UniProtKB:P39153		1	0	0	0	0	0	0
1049	PFR_JS15-1_1022	Glycosyltransferase, group 4 family	1176410	1177546	+	PROKKA_01044	Decaprenyl-phosphate N-acetylglucosaminephosphotransferase	1176410	1177546	+	2.7.8.35	wecA	similar to AA sequence:UniProtKB:Q10606		1	0	0	0	0	0	0
1050	PFR_JS15-1_1023	Hypothetical protein	1177660	1178061	+	PROKKA_01045	hypothetical protein	1177660	1178061	+					1	0	0	0	0	0	0
1051	PFR_JS15-1_1024	Hypothetical protein	1178058	1178282	+	PROKKA_01046	Putative F0F1-ATPase subunit (ATPase_gene1)	1178058	1178282	+			protein motif:Pfam:PF09527.4		1	0	0	0	0	0	0
1052	PFR_JS15-1_1025	ATP synthase subunit a	1178275	1179156	+	PROKKA_01047	ATP synthase subunit a	1178275	1179156	+		atpB	similar to AA sequence:UniProtKB:O05330		1	0	0	0	0	0	0
1053	PFR_JS15-1_1026	ATP synthase C chain (F1F0-ATPase subunit c )	1179202	1179420	+	PROKKA_01048	ATP synthase subunit c	1179202	1179420	+		atpE	similar to AA sequence:UniProtKB:Q2RFX4		1	0	0	0	0	0	0
1054	PFR_JS15-1_1027	ATP synthase subunit b	1179431	1179985	+	PROKKA_01049	ATP synthase subunit b	1179431	1179985	+		atpF	similar to AA sequence:UniProtKB:P80285		1	0	0	0	0	0	0
1055	PFR_JS15-1_1028	ATP synthase F1, delta subunit	1179982	1180761	+	PROKKA_01050	ATP synthase subunit delta	1179982	1180761	+		atpH	similar to AA sequence:UniProtKB:P50008		1	0	0	0	0	0	0
1056	PFR_JS15-1_1029	ATP synthase subunit alpha	1180836	1182473	+	PROKKA_01051	ATP synthase subunit alpha	1180836	1182473	+	3.6.3.14	atpA	similar to AA sequence:UniProtKB:P50001		1	0	0	0	0	0	0
1057	PFR_JS15-1_1030	ATP synthase gamma chain	1182476	1183411	+	PROKKA_01052	ATP synthase gamma chain	1182476	1183411	+		atpG	similar to AA sequence:UniProtKB:P50007		1	0	0	0	0	0	0
1058	PFR_JS15-1_1031	ATP synthase subunit beta	1183412	1184863	+	PROKKA_01053	ATP synthase subunit beta	1183412	1184863	+	3.6.3.14	atpD	similar to AA sequence:UniProtKB:A0R200		1	0	0	0	0	0	0
1059	PFR_JS15-1_1032	ATP synthase F1, epsilon subunit	1184863	1185330	+	PROKKA_01054	ATP synthase epsilon chain	1184863	1185330	+		atpC	similar to AA sequence:UniProtKB:P0A2Z7		1	0	0	0	0	0	0
1060	PFR_JS15-1_1033	Hypothetical protein	1185372	1185830	+	PROKKA_01055	hypothetical protein	1185372	1185830	+					1	0	0	0	0	0	0
1061	PFR_JS15-1_1034	Lipoate-protein ligase LplJ	1185854	1186918	+	PROKKA_01056	putative lipoate-protein ligase A	1185854	1186918	+	2.7.7.63	lplA	similar to AA sequence:UniProtKB:P75394		1	0	0	0	0	0	0
1062	PFR_JS15-1_1035	ATP:cob(I)alamin adenosyltransferase	1187093	1187701	-	PROKKA_01057	Cob(I)yrinic acid a,c-diamide adenosyltransferase	1187093	1187701	-	2.5.1.17		similar to AA sequence:UniProtKB:P64803		1	0	0	0	0	0	0
1063	PFR_JS15-1_1036	Abhydrolase domain-containing protein 11	1187780	1188610	-	PROKKA_01058	Esterase YbfF	1187780	1188610	-	3.1.-.-	ybfF	similar to AA sequence:UniProtKB:P75736		1	0	0	0	0	0	0
1064	PFR_JS15-1_1037	Hypothetical protein	1188607	1188885	-	PROKKA_01059	hypothetical protein	1188607	1188885	-					1	0	0	0	0	0	0
1065	PFR_JS15-1_1038	Endonuclease NucS	1189042	1189689	+	PROKKA_01060	hypothetical protein	1189042	1189689	+			protein motif:CLUSTERS:PRK03298		1	0	0	0	0	0	0
1066	PFR_JS15-1_1039	Hypothetical protein	1189730	1191523	-	PROKKA_01061	hypothetical protein	1189730	1191523	-					1	0	0	0	0	0	0
1067	PFR_JS15-1_1040	Putative phosphate acyltransferase	1191682	1192257	-	PROKKA_01062	hypothetical protein	1191682	1192257	-					1	0	0	0	0	0	0
1068	PFR_JS15-1_1041	4-hydroxyphenylpyruvate dioxygenase C domain	1192413	1192859	-	PROKKA_01063	Glyoxalase/Bleomycin resistance protein/Dioxygenase superfamily protein	1192413	1192859	-			protein motif:Pfam:PF00903.19		1	0	0	0	0	0	0
1069	PFR_JS15-1_1042	Thioredoxin	1193091	1194083	-	PROKKA_01064	hypothetical protein	1193091	1194083	-					1	0	0	0	0	0	0
1070	PFR_JS15-1_1043	Phosphoglucomutase PgmA	1194216	1195847	+	PROKKA_01065	Phosphoglucomutase	1194216	1195847	+	5.4.2.2	pgm	similar to AA sequence:UniProtKB:P36938		1	0	0	0	0	0	0
1071	PFR_JS15-1_1044	Hydrolase, NUDIX family	1195962	1196747	-	PROKKA_01066	hypothetical protein	1195962	1196747	-			protein motif:CLUSTERS:PRK08999		0	0	0	0	0	0	0
1072	PFR_JS15-1_1045	1,4-alpha-glucan branching enzyme GlgB	1196783	1198687	-	PROKKA_01067	1,4-alpha-glucan branching enzyme GlgB	1196783	1198687	-	2.4.1.18	glgB	similar to AA sequence:UniProtKB:Q10625		1	0	0	0	0	0	0
1073	PFR_JS15-1_1046	Maltokinase	1198680	1200017	-	PROKKA_01068	Maltokinase	1198680	1200017	-	2.7.1.175	mak1	similar to AA sequence:UniProtKB:Q7WUM3		1	0	0	0	0	0	0
1074	PFR_JS15-1_1047	Maltose alpha-D-glucosyltransferase	1200033	1201850	-	PROKKA_01069	Trehalose synthase/amylase TreS	1200033	1201850	-	3.2.1.1	treS	similar to AA sequence:UniProtKB:A0R6E0		1	0	0	0	0	0	0
1075	PFR_JS15-1_1048	Alpha-1,4-glucan:maltose-1-phosphate	1201918	1204032	-	PROKKA_01070	Alpha-1,4-glucan:maltose-1-phosphate maltosyltransferase 2	1201918	1204032	-	2.4.99.16	glgE2	similar to AA sequence:UniProtKB:Q9KY04		1	0	0	0	0	0	0
1076	PFR_JS15-1_1049	Phosphorylase	1204158	1206749	+	PROKKA_01071	Maltodextrin phosphorylase	1204158	1206749	+	2.4.1.1	malP	similar to AA sequence:UniProtKB:P00490		1	0	0	0	0	0	0
1077	PFR_JS15-1_1050	Hypothetical protein	1206912	1207784	-	PROKKA_01072	hypothetical protein	1206912	1207784	-					0	0	0	0	0	0	0
1078	PFR_JS15-1_1051	Hypothetical protein	1207766	1208353	-	PROKKA_01073	hypothetical protein	1207766	1208353	-					0	0	0	0	0	0	0
1079	PFR_JS15-1_1052	Glycogen debranching enzyme GlgX	1208571	1210763	-	PROKKA_01074	Glycogen debranching enzyme	1208571	1210763	-	3.2.1.-	glgX_1	similar to AA sequence:UniProtKB:P15067		1	0	0	0	0	0	0
1080	PFR_JS15-1_1053	TRNA	1211020	1212093	+	PROKKA_01075	tRNA-specific 2-thiouridylase MnmA	1211020	1212093	+	2.8.1.-	mnmA	similar to AA sequence:UniProtKB:Q931Q6		1	0	0	0	0	0	0
1081	PFR_JS15-1_1054	Methionine synthase, vitamin-B12 independent	1212139	1213125	+	PROKKA_01076	Cobalamin-independent synthase, Catalytic domain	1212139	1213125	+			protein motif:Pfam:PF01717.12		1	0	0	0	0	0	0
1082	PFR_JS15-1_1055	Hypothetical membrane anchored protein	1213194	1213397	+	PROKKA_01077	hypothetical protein	1213194	1213397	+					1	0	0	0	0	0	0
1083	PFR_JS15-1_1056	Amino acid-binding ACT domain protein	1213417	1214043	-	PROKKA_01078	ACT domain protein	1213417	1214043	-			protein motif:Pfam:PF01842.19		1	0	0	0	0	0	0
1084	PFR_JS15-1_1057	Aspartyl/glutamyl-tRNA(Asn/Gln) amidotransferase	1214264	1214566	+	PROKKA_01079	Aspartyl/glutamyl-tRNA(Asn/Gln) amidotransferase subunit C	1214264	1214566	+	6.3.5.-	gatC	similar to AA sequence:UniProtKB:P68808		1	0	0	0	0	0	0
1085	PFR_JS15-1_1058	Glutamyl-tRNA(Gln) amidotransferase subunit A	1214574	1216106	+	PROKKA_01080	Glutamyl-tRNA(Gln) amidotransferase subunit A	1214574	1216106	+	6.3.5.-	gatA	similar to AA sequence:UniProtKB:Q8NR17		1	0	0	0	0	0	0
1086	PFR_JS15-1_1059	Aspartyl/glutamyl-tRNA(Asn/Gln) amidotransferase	1216103	1217614	+	PROKKA_01081	Aspartyl/glutamyl-tRNA(Asn/Gln) amidotransferase subunit B	1216103	1217614	+	6.3.5.-	gatB	similar to AA sequence:UniProtKB:O66766		1	0	0	0	0	0	0
1087	PFR_JS15-1_1060	Integral membrane lysyl-tRNA synthetase	1218115	1220244	+	PROKKA_01082	Phosphatidylglycerol lysyltransferase	1218115	1220244	+	2.3.2.3	mprF	similar to AA sequence:UniProtKB:C0H3X7		0	0	0	0	0	0	0
1088	PFR_JS15-1_1061	Hypothetical protein	1220241	1221260	+	PROKKA_01083	hypothetical protein	1220241	1221260	+					0	0	0	0	0	0	0
1089	PFR_JS15-1_1062	Hypothetical protein	1221226	1221558	+	PROKKA_01084	hypothetical protein	1221226	1221558	+					0	0	0	0	0	0	0
1090	PFR_JS15-1_1063	Dipeptidase pepE	1221588	1222721	-	PROKKA_01085	Xaa-Pro dipeptidase	1221588	1222721	-	3.4.13.9	pepQ	similar to AA sequence:UniProtKB:Q9S6S1		0	0	0	0	0	0	0
1091	PFR_JS15-1_1064	PTS system fructose IIA component	1223194	1223616	+	PROKKA_01086	PTS system mannose-specific EIIAB component	1223194	1223616	+		manX	similar to AA sequence:UniProtKB:P69797		1	0	0	0	0	0	0
1092	PFR_JS15-1_1065	CBS domain protein/ACT domain-containing protein	1223648	1224298	-	PROKKA_01087	Hypoxic response protein 1	1223648	1224298	-		hrp1	similar to AA sequence:UniProtKB:O06186		1	0	0	0	0	0	0
1093	PFR_JS15-1_1066	Branched-chain amino acid ABC transporter,	1224300	1225004	-	PROKKA_01088	High-affinity branched-chain amino acid transport ATP-binding protein LivF	1224300	1225004	-		livF	similar to AA sequence:UniProtKB:P22731		1	0	0	0	0	0	0
1094	PFR_JS15-1_1067	Branched-chain amino acid ABC superfamily ATP	1224997	1225788	-	PROKKA_01089	Lipopolysaccharide export system ATP-binding protein LptB	1224997	1225788	-	3.6.3.-	lptB	similar to AA sequence:UniProtKB:P45073		1	0	0	0	0	0	0
1095	PFR_JS15-1_1068	Branched-chain amino acid ABC transporter,	1225785	1226804	-	PROKKA_01090	High-affinity branched-chain amino acid transport system permease protein LivH	1225785	1226804	-		livH_1	similar to AA sequence:UniProtKB:P0AEX7		1	0	0	0	0	0	0
1096	PFR_JS15-1_1069	High-affinity branched-chain amino acid transport	1226801	1227685	-	PROKKA_01091	High-affinity branched-chain amino acid transport system permease protein LivH	1226801	1227685	-		livH_2	similar to AA sequence:UniProtKB:P0AEX7		1	0	0	0	0	0	0
1097	PFR_JS15-1_1070	Extracellular ligand-binding receptor	1227782	1228945	-	PROKKA_01092	hypothetical protein	1227782	1228945	-			similar to AA sequence:UniProtKB:Q8YEE8	Leu/Ile/Val-binding protein homolog 3 precursor	1	0	0	0	0	0	0
1098	PFR_JS15-1_1071	Dihydrolipoyl dehydrogenase	1229141	1230541	-	PROKKA_01093	Dihydrolipoyl dehydrogenase	1229141	1230541	-	1.8.1.4	lpdC	similar to AA sequence:UniProtKB:P66004		1	0	0	0	0	0	0
1099	PFR_JS15-1_1072	UDP-N-acetylglucosamine 1-carboxyvinyltransferase	1230688	1232223	+	PROKKA_01094	UDP-N-acetylglucosamine 1-carboxyvinyltransferase	1230688	1232223	+	2.5.1.7	murA	similar to AA sequence:UniProtKB:Q3KHZ4		1	0	0	0	0	0	0
1100	PFR_JS15-1_1073	Pyridoxal kinase	1232314	1233183	-	PROKKA_01095	Pyridoxamine kinase	1232314	1233183	-	2.7.1.35	pdxY	similar to AA sequence:UniProtKB:Q7CIR8		1	0	0	0	0	0	0
1101	PFR_JS15-1_1074	Hypothetical protein	1233321	1233845	+	PROKKA_01096	Putative transmembrane protein (PGPGW)	1233321	1233845	+			protein motif:Pfam:PF09656.4		1	0	0	0	0	0	0
1102	PFR_JS15-1_1075	Glycerophosphodiester phosphodiesterase family	1233890	1234687	+	PROKKA_01097	Glycerophosphoryl diester phosphodiesterase	1233890	1234687	+	3.1.4.46	ugpQ_1	similar to AA sequence:UniProtKB:P10908		1	0	0	0	0	0	0
1103	PFR_JS15-1_1076	PF13397 domain protein	1234794	1235132	+	PROKKA_01098	RNA polymerase-binding protein RbpA	1234794	1235132	+		rbpA_1	similar to AA sequence:UniProtKB:Q9RKY0		1	0	0	0	0	0	0
1104	PFR_JS15-1_1077	ApolipoproteiN n-acyltransferase	1235228	1236034	-	PROKKA_01099	Undecaprenyl-phosphate mannosyltransferase	1235228	1236034	-	2.4.1.54		similar to AA sequence:UniProtKB:C5CBV8		1	0	0	0	0	0	0
1105	PFR_JS15-1_1078	Hypothetical protein	1236121	1237755	-	PROKKA_01100	Apolipoprotein N-acyltransferase	1236121	1237755	-	2.3.1.-	lnt	similar to AA sequence:UniProtKB:P23930		1	0	0	0	0	0	0
1106	PFR_JS15-1_1079	Transcriptional regulator, AsnC family	1237849	1238262	-	PROKKA_01101	HTH-type transcriptional regulator LrpC	1237849	1238262	-		lrpC	similar to AA sequence:UniProtKB:P96582		1	0	0	0	0	0	0
1107	PFR_JS15-1_1080	Methionine biosynthesis protein MetW	1238398	1239084	-	PROKKA_01102	hypothetical protein	1238398	1239084	-			protein motif:CLUSTERS:PRK08317		1	0	0	0	0	0	0
1108	PFR_JS15-1_1081	Homoserine O-acetyltransferase (Precursor)	1239081	1240334	-	PROKKA_01103	Homoserine O-acetyltransferase	1239081	1240334	-	2.3.1.31	metX	similar to AA sequence:UniProtKB:Q8F4I0		1	0	0	0	0	0	0
1109	PFR_JS15-1_1082	ABC-type nitrate/sulfonate/bicarbonate transport	1240516	1241523	-	PROKKA_01104	Putative thiamine biosynthesis protein	1240516	1241523	-			similar to AA sequence:UniProtKB:P44658		1	0	0	0	0	0	0
1110	PFR_JS15-1_1083	Nitrate/sulfonate/bicarbonate ABC transporter,	1241520	1242410	-	PROKKA_01105	Carnitine transport permease protein OpuCD	1241520	1242410	-		opuCD	similar to AA sequence:UniProtKB:Q9KHT6		1	0	0	0	0	0	0
1111	PFR_JS15-1_1084	Antiseptic resistance protein	1242718	1244298	-	PROKKA_01106	Antiseptic resistance protein	1242718	1244298	-		qacA_1	similar to AA sequence:UniProtKB:P0A0J9		1	0	0	0	0	0	0
1112	PFR_JS15-1_1085	S-ribosylhomocysteinase LuxS	1244490	1244954	-	PROKKA_01107	S-ribosylhomocysteine lyase	1244490	1244954	-	4.4.1.21	luxS	similar to AA sequence:UniProtKB:Q9ZMW8		1	1	1	0	0	0	0
1113						PROKKA_01108	tRNA-Pro(ggg)	1245207	1245281	+			COORDINATES:profile:Aragorn:1.2		0					0	0
1114	PFR_JS15-1_1086	Prophage integrase	1245515	1246705	-	PROKKA_01109	Transposase from transposon Tn916	1245515	1246705	-		Int-Tn_2	similar to AA sequence:UniProtKB:P22886		0	1	1	0	0	0	0
1115	PFR_JS15-1_1087	Hypothetical protein	1246698	1246913	-	PROKKA_01110	hypothetical protein	1246698	1246913	-					0	1	1	0	0	0	0
1116	PFR_JS15-1_1088	Hypothetical protein	1246894	1247475	-	PROKKA_01111	hypothetical protein	1246894	1247475	-					0	1	1	0	0	0	0
1117	PFR_JS15-1_1089	Hypothetical protein	1247486	1247968	-	PROKKA_01112	hypothetical protein	1247486	1247968	-					0	1	1	0	0	0	0
1118	PFR_JS15-1_1090	Hypothetical protein	1248040	1248654	-	PROKKA_01113	TraM recognition site of TraD and TraG	1248040	1248654	-			protein motif:Pfam:PF12696.1		0	1	1	0	0	0	0
1119	PFR_JS15-1_1091	TrwC relaxase	1248710	1251724	+	PROKKA_01114	ATP-dependent RecD-like DNA helicase	1248710	1251724	+	3.6.4.12	recD2_2	protein motif:HAMAP:MF_01488		0	0	0	0	0	0	0
1120	PFR_JS15-1_1092	Sulfate permease	1251876	1252199	+	PROKKA_01115	hypothetical protein	1251876	1252199	+					0	0	0	0	0	0	0
1121	PFR_JS15-1_1093	AAA ATPase central domain protein	1252296	1253252	+	PROKKA_01116	ATP-dependent zinc metalloprotease FtsH 3	1252296	1253252	+	3.4.24.-	ftsH3	similar to AA sequence:UniProtKB:P72991		0	0	0	0	0	0	0
1122	PFR_JS15-1_1094	Peptidase, S8A	1253471	1255861	+	PROKKA_01117	hypothetical protein	1253471	1255861	+					0	1	1	0	0	0	0
1123	PFR_JS15-1_1095	Hypothetical protein	1255914	1257413	+	PROKKA_01118	hypothetical protein	1255914	1257413	+					0	1	1	0	0	0	0
1124	PFR_JS15-1_1096	Hypothetical protein	1257495	1259684	+	PROKKA_01119	hypothetical protein	1257495	1259684	+					0	1	1	0	0	0	0
1125	PFR_JS15-1_1097	Transcriptional regulator	1260024	1260329	-	PROKKA_01120	Helix-turn-helix domain protein	1260024	1260329	-			protein motif:Pfam:PF12840.1		1	1	1	0	0	0	0
1126	PFR_JS15-1_1098	Hypothetical protein	1260322	1260843	-	PROKKA_01121	hypothetical protein	1260322	1260843	-					1	1	1	0	0	0	0
1127	PFR_JS15-1_1099	PecM protein	1261014	1261889	+	PROKKA_01122	Threonine/homoserine exporter RhtA	1261014	1261889	+		rhtA	similar to AA sequence:UniProtKB:P0AA67		0	0	0	0	0	0	0
1128	PFR_JS15-1_1100	Zinc-containing alcohol dehydrogenase (ADH)	1261998	1262948	+	PROKKA_01123	ethanol-active dehydrogenase/acetaldehyde-active reductase	1261998	1262948	+			protein motif:CLUSTERS:PRK09422		0	0	0	0	0	0	0
1129	PFR_JS15-1_1101	Transcriptional regulator, TetR family	1262994	1263572	-	PROKKA_01124	HTH-type transcriptional regulator RutR	1262994	1263572	-		rutR	similar to AA sequence:UniProtKB:P0ACU2		1	0	0	0	0	0	0
1130	PFR_JS15-1_1102	Permease of the major facilitator family protein	1263598	1264125	-	PROKKA_01125	Antiseptic resistance protein	1263598	1264125	-		qacA_2	similar to AA sequence:UniProtKB:P0A0J9		0	0	0	0	0	0	0
1131	PFR_JS15-1_1103	Putative methyl viologen resistance protein	1264065	1265099	-	PROKKA_01126	Antiseptic resistance protein	1264065	1265099	-		qacA_3	similar to AA sequence:UniProtKB:P0A0J9		1	0	0	0	0	0	0
1132	PFR_JS15-1_1104	Protein of hypothetical function DUF1706	1265223	1265732	+	PROKKA_01127	hypothetical protein	1265223	1265732	+					1	0	0	0	0	0	0
1133	PFR_JS15-1_1105	GTPase Der	1265767	1267116	-	PROKKA_01128	GTPase Der	1265767	1267116	-		der	similar to AA sequence:UniProtKB:P50743		1	0	0	0	0	0	0
1134	PFR_JS15-1_1106	Putative cytidylate kinase	1267231	1267902	-	PROKKA_01129	Cytidylate kinase	1267231	1267902	-	2.7.4.25	cmk	similar to AA sequence:UniProtKB:P63803		1	0	0	0	0	0	0
1135	PFR_JS15-1_1107	Prephenate dehydrogenase	1267942	1269036	-	PROKKA_01130	prephenate dehydrogenase	1267942	1269036	-			protein motif:CLUSTERS:PRK06545		1	0	0	0	0	0	0
1136	PFR_JS15-1_1108	Proteasome subunit alpha	1269038	1269763	-	PROKKA_01131	Proteasome subunit alpha	1269038	1269763	-	3.4.25.1	prcA	similar to AA sequence:UniProtKB:Q7AKQ6		1	0	0	0	0	0	0
1137	PFR_JS15-1_1109	Proteasome subunit beta	1269760	1270626	-	PROKKA_01132	Proteasome subunit beta precursor	1269760	1270626	-	3.4.25.1	prcB	similar to AA sequence:UniProtKB:Q7AKQ5		1	0	0	0	0	0	0
1138	PFR_JS15-1_1110	TRNA (Adenine-58-N(1)-) methyltransferase	1270619	1271689	-	PROKKA_01133	tRNA (adenine(58)-N(1))-methyltransferase TrmI	1270619	1271689	-	2.1.1.220	trmI	similar to AA sequence:UniProtKB:O33253		1	0	0	0	0	0	0
1139	PFR_JS15-1_1111	HAD-superfamily hydrolase, subfamily IA, variant	1271686	1272411	-	PROKKA_01134	Phosphorylated carbohydrates phosphatase	1271686	1272411	-	3.1.3.-		similar to AA sequence:UniProtKB:Q9X0Y1		1	0	0	0	0	0	0
1140	PFR_JS15-1_1112	Signal peptide peptidase SppA	1272595	1273851	+	PROKKA_01135	Putative signal peptide peptidase SppA	1272595	1273851	+	3.4.21.-	sppA	similar to AA sequence:UniProtKB:O34525		1	0	0	0	0	0	0
1141	PFR_JS15-1_1113	5-methyltetrahydrofolate-homocysteine	1274109	1277576	-	PROKKA_01136	Methionine synthase	1274109	1277576	-	2.1.1.13	metH	similar to AA sequence:UniProtKB:P13009		1	0	0	0	0	0	0
1142	PFR_JS15-1_1114	Proteasome assembly chaperones 2	1277728	1278558	+	PROKKA_01137	PAC2 family protein	1277728	1278558	+			protein motif:Pfam:PF09754.3		1	0	0	0	0	0	0
1143	PFR_JS15-1_1115	Aminopeptidase C	1278659	1279990	-	PROKKA_01138	Aminopeptidase C	1278659	1279990	-	3.4.22.40	pepC_2	similar to AA sequence:UniProtKB:Q04723		1	0	0	0	0	0	0
1144	PFR_JS15-1_1116	Ribulose-phosphate 3-epimerase Rpe	1280050	1280712	-	PROKKA_01139	Ribulose-phosphate 3-epimerase	1280050	1280712	-	5.1.3.1	rpe	similar to AA sequence:UniProtKB:P0AG07		1	0	0	0	0	0	0
1145	PFR_JS15-1_1117	Putative ribosomal RNA small subunit	1280747	1282216	-	PROKKA_01140	Ribosomal RNA small subunit methyltransferase B	1280747	1282216	-	2.1.1.176	rsmB	similar to AA sequence:UniProtKB:P36929		1	0	0	0	0	0	0
1146	PFR_JS15-1_1118	Methionyl-tRNA formyltransferase Fmt	1282209	1283156	-	PROKKA_01141	Methionyl-tRNA formyltransferase	1282209	1283156	-	2.1.2.9	fmt	similar to AA sequence:UniProtKB:A0QWU2		1	0	0	0	0	0	0
1147	PFR_JS15-1_1119	Primosomal protein N' PriA	1283234	1285255	-	PROKKA_01142	Primosomal protein N'	1283234	1285255	-	3.6.4.-	priA_1	similar to AA sequence:UniProtKB:P17888		1	0	0	0	0	0	0
1148	PFR_JS15-1_1120	S-adenosylmethionine synthase MetK	1285366	1286556	-	PROKKA_01143	S-adenosylmethionine synthase	1285366	1286556	-	2.5.1.6	metK	similar to AA sequence:UniProtKB:A0QWT3		1	0	0	0	0	0	0
1149	PFR_JS15-1_1121	DNA-directed RNA polymerase, omega subunit	1286622	1286990	-	PROKKA_01144	DNA-directed RNA polymerase subunit omega	1286622	1286990	-	2.7.7.6	rpoZ	similar to AA sequence:UniProtKB:Q9KXS1		1	0	0	0	0	0	0
1150	PFR_JS15-1_1122	Guanylate kinase	1287050	1287670	-	PROKKA_01145	Guanylate kinase	1287050	1287670	-	2.7.4.8	gmk	similar to AA sequence:UniProtKB:P0A5I4		1	0	0	0	0	0	0
1151	PFR_JS15-1_1123	Integration host factor family protein	1287674	1287985	-	PROKKA_01146	hypothetical protein	1287674	1287985	-					1	0	0	0	0	0	0
1152	PFR_JS15-1_1124	Orotidine 5'-phosphate decarboxylase	1288148	1288957	-	PROKKA_01147	orotidine 5'-phosphate decarboxylase	1288148	1288957	-			protein motif:CLUSTERS:PRK00125		1	0	0	0	0	0	0
1153	PFR_JS15-1_1125	Dihydroorotate dehydrogenase (quinone)	1288954	1290054	-	PROKKA_01148	Dihydroorotate dehydrogenase (quinone)	1288954	1290054	-	1.3.5.2	pyrD	similar to AA sequence:UniProtKB:P0A7E1		1	0	0	0	0	0	0
1154	PFR_JS15-1_1126	Carbamoyl-phosphate synthase large chain	1290136	1293477	-	PROKKA_01149	Carbamoyl-phosphate synthase large chain	1290136	1293477	-	6.3.5.5	carB_2	similar to AA sequence:UniProtKB:P00968		1	0	0	0	0	0	0
1155	PFR_JS15-1_1127	Carbamoyl-phosphate synthase small chain	1293477	1294661	-	PROKKA_01150	Carbamoyl-phosphate synthase small chain	1293477	1294661	-	6.3.5.5	carA	similar to AA sequence:UniProtKB:P0A6F1		1	0	0	0	0	0	0
1156	PFR_JS15-1_1128	N utilization substance protein B homolog	1294840	1295466	-	PROKKA_01151	hypothetical protein	1294840	1295466	-			similar to AA sequence:UniProtKB:P95020	N utilization substance protein B homolog	1	0	0	0	0	0	0
1157	PFR_JS15-1_1129	Translation elongation factor P	1295466	1296047	-	PROKKA_01152	Elongation factor P	1295466	1296047	-		efp	similar to AA sequence:UniProtKB:A0QWR4		1	0	0	0	0	0	0
1158	PFR_JS15-1_1130	Bifunctional shikimate kinase/3-dehydroquinate	1296206	1297855	-	PROKKA_01153	3-dehydroquinate synthase	1296206	1297855	-	4.2.3.4	aroB	similar to AA sequence:UniProtKB:P0A4Z4		1	0	0	0	0	0	0
1159	PFR_JS15-1_1131	Chorismate synthase	1297852	1299054	-	PROKKA_01154	Chorismate synthase	1297852	1299054	-	4.2.3.5	aroC	similar to AA sequence:UniProtKB:P63611		1	0	0	0	0	0	0
1160	PFR_JS15-1_1132	Aminodeoxychorismate lyase	1299209	1300441	-	PROKKA_01155	putative aminodeoxychorismate lyase	1299209	1300441	-			protein motif:CLUSTERS:PRK10270		1	0	0	0	0	0	0
1161	PFR_JS15-1_1133	Putative crossover junction	1300416	1300961	-	PROKKA_01156	Putative Holliday junction resolvase	1300416	1300961	-	3.1.-.-	yrrK	similar to AA sequence:UniProtKB:O34634		1	0	0	0	0	0	0
1162	PFR_JS15-1_1134	Alanyl-tRNA synthetase AlaS	1300945	1303632	-	PROKKA_01157	Alanine--tRNA ligase	1300945	1303632	-	6.1.1.7	alaS	similar to AA sequence:UniProtKB:A0QWQ4		1	0	0	0	0	0	0
1163	PFR_JS15-1_1135	Lactate/malate dehydrogenase, NAD binding domain	1303797	1304777	-	PROKKA_01158	L-lactate dehydrogenase	1303797	1304777	-	1.1.1.27	ldh	similar to AA sequence:UniProtKB:Q9EVR0		1	0	0	0	0	0	0
1164	PFR_JS15-1_1136	Recombination factor protein RarA	1304832	1306256	-	PROKKA_01159	Replication-associated recombination protein A	1304832	1306256	-		rarA	similar to AA sequence:UniProtKB:P0AAZ4		1	0	0	0	0	0	0
1165	PFR_JS15-1_1137	Aspartyl-tRNA synthetase aspS	1306381	1308228	-	PROKKA_01160	Aspartate--tRNA ligase	1306381	1308228	-	6.1.1.12	aspS	similar to AA sequence:UniProtKB:P21889		1	0	0	0	0	0	0
1166	PFR_JS15-1_1138	Hypothetical protein	1308428	1309501	-	PROKKA_01161	hypothetical protein	1308428	1309501	-					1	0	0	0	0	0	0
1167	PFR_JS15-1_1139	Alpha-acetolactate decarboxylase AldC	1309710	1310525	-	PROKKA_01162	Alpha-acetolactate decarboxylase	1309710	1310525	-	4.1.1.5	alsD	similar to AA sequence:UniProtKB:Q04777		1	0	0	0	0	0	0
1168	PFR_JS15-1_1140	HisS Histidyl-tRNA synthetase	1310639	1311970	-	PROKKA_01163	Histidine--tRNA ligase	1310639	1311970	-	6.1.1.21	hisS	similar to AA sequence:UniProtKB:Q8YMC2		1	0	0	0	0	0	0
1169	PFR_JS15-1_1141	Putative glyoxalase II (Hydroxyacylglutathione	1311970	1312689	-	PROKKA_01164	putative metallo-hydrolase	1311970	1312689	-	3.-.-.-		similar to AA sequence:UniProtKB:Q5XD24		1	0	0	0	0	0	0
1170	PFR_JS15-1_1142	Conserved alanine and arginine rich protein	1312793	1313932	+	PROKKA_01165	hypothetical protein	1312793	1313932	+					1	0	0	0	0	0	0
1171	PFR_JS15-1_1143	GTP diphosphokinase	1314013	1316364	-	PROKKA_01166	Bifunctional (p)ppGpp synthase/hydrolase relA	1314013	1316364	-		relA_2	similar to AA sequence:UniProtKB:P66014		1	0	0	0	0	0	0
1172	PFR_JS15-1_1144	Adenine phosphoribosyltransferase	1316427	1316966	-	PROKKA_01167	Adenine phosphoribosyltransferase	1316427	1316966	-	2.4.2.7	apt	similar to AA sequence:UniProtKB:Q66DQ2		1	0	0	0	0	0	0
1173	PFR_JS15-1_1145	Protein translocase subunit SecF	1316969	1318216	-	PROKKA_01168	preprotein translocase subunit SecF	1316969	1318216	-			protein motif:CLUSTERS:PRK13022		1	0	0	0	0	0	0
1174	PFR_JS15-1_1146	Protein translocase subunit SecD	1318216	1319934	-	PROKKA_01169	preprotein translocase subunit SecD	1318216	1319934	-			protein motif:CLUSTERS:PRK05812		1	0	0	0	0	0	0
1175	PFR_JS15-1_1147	Preprotein translocase, YajC subunit	1319962	1320465	-	PROKKA_01170	preprotein translocase subunit YajC	1319962	1320465	-			protein motif:CLUSTERS:PRK05585		1	0	0	0	0	0	0
1176	PFR_JS15-1_1148	Holliday junction ATP-dependent DNA helicase	1320576	1321601	-	PROKKA_01171	Holliday junction ATP-dependent DNA helicase RuvB	1320576	1321601	-	3.6.4.12	ruvB	similar to AA sequence:UniProtKB:A0QWH6		1	0	0	0	0	0	0
1177	PFR_JS15-1_1149	Holliday junction ATP-dependent DNA helicase	1321665	1322276	-	PROKKA_01172	Holliday junction ATP-dependent DNA helicase RuvA	1321665	1322276	-	3.6.4.12	ruvA	similar to AA sequence:UniProtKB:A0QWH5		1	0	0	0	0	0	0
1178	PFR_JS15-1_1150	Crossover junction endodeoxyribonuclease RuvC	1322273	1322884	-	PROKKA_01173	Crossover junction endodeoxyribonuclease RuvC	1322273	1322884	-	3.1.22.4	ruvC	similar to AA sequence:UniProtKB:Q5SJC4		1	0	0	0	0	0	0
1179	PFR_JS15-1_1151	Probable transcriptional regulatory protein yebC	1323136	1323936	-	PROKKA_01174	putative transcriptional regulatory protein/MSMEI_2866	1323136	1323936	-			similar to AA sequence:UniProtKB:A0QWH1		1	0	0	0	0	0	0
1180	PFR_JS15-1_1152	Acetyltransferase, GNAT family	1324100	1325137	-	PROKKA_01175	putative acetyltransferase	1324100	1325137	-			protein motif:CLUSTERS:PRK03624		1	0	0	0	0	0	0
1181	PFR_JS15-1_1153	Phosphoribosyl isomerase A	1325134	1325859	-	PROKKA_01176	Phosphoribosyl isomerase A	1325134	1325859	-	5.3.1.16	priA_2	similar to AA sequence:UniProtKB:P16250		1	0	0	0	0	0	0
1182	PFR_JS15-1_1154	Imidazole glycerol phosphate synthase subunit	1325928	1326605	-	PROKKA_01177	Imidazole glycerol phosphate synthase subunit HisH	1325928	1326605	-	2.4.2.-	hisH	similar to AA sequence:UniProtKB:P59957		1	0	0	0	0	0	0
1183	PFR_JS15-1_1155	Imidazoleglycerol-phosphate dehydratase	1326602	1327210	-	PROKKA_01178	Imidazoleglycerol-phosphate dehydratase	1326602	1327210	-	4.2.1.19	hisB	similar to AA sequence:UniProtKB:P64368		1	0	0	0	0	0	0
1184	PFR_JS15-1_1156	Histidinol-phosphate aminotransferase 2	1327207	1328427	-	PROKKA_01179	Histidinol-phosphate aminotransferase	1327207	1328427	-	2.6.1.9	hisC	similar to AA sequence:UniProtKB:Q9KJU4		1	0	0	0	0	0	0
1185	PFR_JS15-1_1157	Histidinol dehydrogenase	1328427	1329740	-	PROKKA_01180	Histidinol dehydrogenase	1328427	1329740	-	1.1.1.23	hisD	similar to AA sequence:UniProtKB:P63950		1	0	0	0	0	0	0
1186	PFR_JS15-1_1158	Uncharacterized membrane protein, possible Na	1329818	1330618	+	PROKKA_01181	putative membrane protein YdfK	1329818	1330618	+		ydfK	similar to AA sequence:UniProtKB:P96689		0	0	0	0	0	0	0
1187	PFR_JS15-1_1159	Cys-tRNA(Pro)/Cys-tRNA(Cys) deacylase ybaK	1330664	1331182	+	PROKKA_01182	Cys-tRNA(Pro)/Cys-tRNA(Cys) deacylase YbaK	1330664	1331182	+	4.2.-.-	ybaK	similar to AA sequence:UniProtKB:P0AAR3		0	0	0	0	0	0	0
1188	PFR_JS15-1_1160	Hypothetical protein	1331219	1331944	-	PROKKA_01183	hypothetical protein	1331219	1331944	-					0	0	0	0	0	0	0
1189	PFR_JS15-1_1161	DNA polymerase III, alpha subunit	1332017	1335589	-	PROKKA_01184	DNA polymerase III subunit alpha	1332017	1335589	-	2.7.7.7	dnaE_1	similar to AA sequence:UniProtKB:Q9XDH5		0	0	0	0	0	0	0
1190	PFR_JS15-1_1162	Hypothetical protein	1335815	1336486	+	PROKKA_01185	hypothetical protein	1335815	1336486	+					1	0	0	0	0	0	0
1191	PFR_JS15-1_1163	Glutamate synthase subunit beta	1336507	1337976	-	PROKKA_01186	Glutamate synthase [NADPH] small chain	1336507	1337976	-	1.4.1.13	gltB_1	similar to AA sequence:UniProtKB:O34399		1	0	0	0	0	0	0
1192	PFR_JS15-1_1164	Class II glutamine amidotransferase	1337969	1342477	-	PROKKA_01187	Glutamate synthase [NADPH] large chain	1337969	1342477	-	1.4.1.13	gltB_2	similar to AA sequence:UniProtKB:P96218		1	0	0	0	0	0	0
1193	PFR_JS15-1_1165	Prolipoprotein diacylglyceryl transferase	1342621	1343592	-	PROKKA_01188	Prolipoprotein diacylglyceryl transferase	1342621	1343592	-	2.4.99.-	lgt	similar to AA sequence:UniProtKB:O34752		1	0	0	0	0	0	0
1194	PFR_JS15-1_1166	Tryptophan synthase alpha chain	1343589	1344485	-	PROKKA_01189	Tryptophan synthase alpha chain	1343589	1344485	-	4.2.1.20	trpA	similar to AA sequence:UniProtKB:O67502		1	0	0	0	0	0	0
1195	PFR_JS15-1_1167	Tryptophan synthase beta chain	1344482	1345735	-	PROKKA_01190	Tryptophan synthase beta chain	1344482	1345735	-	4.2.1.20	trpB_1	similar to AA sequence:UniProtKB:P66984		1	0	0	0	0	0	0
1196	PFR_JS15-1_1168	Indole-3-glycerol phosphate synthase 1	1345728	1346588	-	PROKKA_01191	Indole-3-glycerol phosphate synthase	1345728	1346588	-	4.1.1.48	trpC	similar to AA sequence:UniProtKB:A0QX95		1	0	0	0	0	0	0
1197	PFR_JS15-1_1169	Anthranilate synthase component I	1346585	1348117	-	PROKKA_01192	Anthranilate synthase component 1	1346585	1348117	-	4.1.3.27	trpE	similar to AA sequence:UniProtKB:A0QX93		1	0	0	0	0	0	0
1198	PFR_JS15-1_1170	Phosphoribosyl-AMP cyclohydrolase (Precursor)	1348114	1348566	-	PROKKA_01193	phosphoribosyl-AMP cyclohydrolase	1348114	1348566	-			protein motif:CLUSTERS:PRK00051		1	0	0	0	0	0	0
1199	PFR_JS15-1_1171	TIGR03085 family protein	1348582	1349328	+	PROKKA_01194	hypothetical protein	1348582	1349328	+					1	0	0	0	0	0	0
1200	PFR_JS15-1_1172	Glutamine--tRNA ligase (Precursor)	1349373	1351085	-	PROKKA_01195	Glutamine--tRNA ligase	1349373	1351085	-	6.1.1.18	glnS	similar to AA sequence:UniProtKB:P00962		1	0	0	0	0	0	0
1201	PFR_JS15-1_1173	Phosphoglycerate mutase family protein	1351107	1351730	-	PROKKA_01196	Glucosyl-3-phosphoglycerate phosphatase	1351107	1351730	-	3.1.3.-	gpgP_2	similar to AA sequence:UniProtKB:A1TC01		1	0	0	0	0	0	0
1202	PFR_JS15-1_1174	ABC transporter permease protein	1351898	1352899	+	PROKKA_01197	ABC transporter substrate binding protein	1351898	1352899	+			protein motif:Pfam:PF04392.6		1	0	0	0	0	0	0
1203	PFR_JS15-1_1175	ABC-type uncharacterized transport system,	1352906	1353859	+	PROKKA_01198	Autoinducer 2 import system permease protein LsrC	1352906	1353859	+		lsrC	similar to AA sequence:UniProtKB:P77672		1	0	0	0	0	0	0
1204	PFR_JS15-1_1176	ABC-type uncharacterized transport system, ATPase	1353861	1354652	+	PROKKA_01199	Methionine import ATP-binding protein MetN 2	1353861	1354652	+	3.6.3.-	metN2	similar to AA sequence:UniProtKB:Q831K6		1	0	0	0	0	0	0
1205	PFR_JS15-1_1177	Proteasome assembly chaperones 2	1354818	1355855	+	PROKKA_01200	PAC2 family protein	1354818	1355855	+			protein motif:Pfam:PF09754.3		1	0	0	0	0	0	0
1206	PFR_JS15-1_1178	LmbE family protein	1355994	1356794	-	PROKKA_01201	1D-myo-inositol 2-acetamido-2-deoxy-alpha-D-glucopyranoside deacetylase	1355994	1356794	-	3.5.1.103	mshB_1	similar to AA sequence:UniProtKB:Q9F344		1	0	0	0	0	0	0
1207	PFR_JS15-1_1179	Hypothetical protein	1356960	1357859	+	PROKKA_01202	intramembrane serine protease GlpG	1356960	1357859	+			protein motif:CLUSTERS:PRK10907		1	0	0	0	0	0	0
1208	PFR_JS15-1_1180	Translation factor SUA5	1357909	1358526	-	PROKKA_01203	Threonylcarbamoyl-AMP synthase	1357909	1358526	-	2.7.7.87	ywlC_2	similar to AA sequence:UniProtKB:P39153		1	0	0	0	0	0	0
1209	PFR_JS15-1_1181	Hypothetical protein	1358595	1359017	-	PROKKA_01204	hypothetical protein	1358595	1359017	-					1	0	0	0	0	0	0
1210	PFR_JS15-1_1182	Phosphofructokinase (Precursor)	1359241	1360455	+	PROKKA_01205	Pyrophosphate--fructose 6-phosphate 1-phosphotransferase	1359241	1360455	+	2.7.1.90	pfp	similar to AA sequence:UniProtKB:P29495		1	0	0	0	0	0	0
1211						PROKKA_01206	tRNA-Asn(gtt)	1360627	1360702	-			COORDINATES:profile:Aragorn:1.2		0					0	0
1212	PFR_JS15-1_1183	Hypothetical protein	1360786	1361352	-	PROKKA_01207	hypothetical protein	1360786	1361352	-					1	0	0	0	0	0	0
1213	PFR_JS15-1_1184	RNA polymerase sigma factor	1361432	1362286	-	PROKKA_01208	RNA polymerase principal sigma factor HrdA	1361432	1362286	-		hrdA	similar to AA sequence:UniProtKB:P18182		1	0	0	0	0	0	0
1214	PFR_JS15-1_1185	DNA primase	1362359	1364227	-	PROKKA_01209	DNA primase	1362359	1364227	-	2.7.7.-	dnaG_1	similar to AA sequence:UniProtKB:P74893		1	0	0	0	0	0	0
1215	PFR_JS15-1_1186	Transcriptional activator, TenA family	1364397	1365092	+	PROKKA_01210	Thiaminase-2	1364397	1365092	+	3.5.99.2	tenA	similar to AA sequence:UniProtKB:P25052		1	0	0	0	0	0	0
1216	PFR_JS15-1_1187	Hypothetical protein	1365130	1365462	+	PROKKA_01211	hypothetical protein	1365130	1365462	+					1	0	0	0	0	0	0
1217	PFR_JS15-1_1188	Hypothetical protein	1365732	1367165	+	PROKKA_01212	hypothetical protein	1365732	1367165	+					0	0	0	0	0	0	0
1218	PFR_JS15-1_1189	ADP-ribosyl-(Dinitrogen reductase) hydrolase	1367270	1368226	+	PROKKA_01213	ADP-ribosyl-[dinitrogen reductase] glycohydrolase	1367270	1368226	+	3.2.2.24	draG	similar to AA sequence:UniProtKB:P14300		0	0	0	0	0	0	0
1219						PROKKA_01214	tRNA-Met(cat)	1369127	1369201	-			COORDINATES:profile:Aragorn:1.2		0					0	0
1220	PFR_JS15-1_1190	Trehalose-6-phosphate phophatase	1369277	1370134	-	PROKKA_01215	Trehalose-6-phosphate phosphatase	1369277	1370134	-	3.1.3.12	otsB	similar to AA sequence:UniProtKB:P31678		1	0	0	0	0	0	0
1221	PFR_JS15-1_1191	Alpha, alpha-trehalose-phosphate synthase otsA	1370296	1371777	+	PROKKA_01216	Trehalose-phosphate synthase	1370296	1371777	+	2.4.1.-	otsA	similar to AA sequence:UniProtKB:A0R4M9		1	0	0	0	0	0	0
1222	PFR_JS15-1_1192	Phosphoglycerate mutase family protein	1372036	1372614	-	PROKKA_01217	Phosphoserine phosphatase 1	1372036	1372614	-	3.1.3.3	pspA	similar to AA sequence:UniProtKB:D3DFG8	B12 biosynthesis	1	0	0	0	0	0	0
1223	PFR_JS15-1_1193	Cobalamin biosynthesis protein CobD	1372618	1373649	+	PROKKA_01218	cobalamin biosynthesis protein	1372618	1373649	+			protein motif:CLUSTERS:PRK01209	B12 biosynthesis	1	0	0	0	0	0	0
1224	PFR_JS15-1_1194	Adenosylcobyric acid synthase	1373646	1375091	+	PROKKA_01219	Cobyric acid synthase	1373646	1375091	+		cobQ_2	similar to AA sequence:UniProtKB:P29932	B12 biosynthesis	1	0	0	0	0	0	0
1225	PFR_JS15-1_1195	Cob(I)yrinic acid a,c-diamide	1375088	1375690	+	PROKKA_01220	Cob(I)yrinic acid a,c-diamide adenosyltransferase	1375088	1375690	+	2.5.1.17	cobO	similar to AA sequence:UniProtKB:P29930	B12 biosynthesis	1	0	0	0	0	0	0
1226	PFR_JS15-1_1196	Cobyrinic acid a,c-diamide synthase	1375684	1378269	+	PROKKA_01221	Cobyrinic acid A,C-diamide synthase	1375684	1378269	+		cobB_4	similar to AA sequence:UniProtKB:P21632	B12 biosynthesis	1	0	0	0	0	0	0
1227	PFR_JS15-1_1197	Bifunctional cobalamin biosynthesis protein cobU	1378266	1378937	+	PROKKA_01222	Bifunctional adenosylcobalamin biosynthesis protein CobU	1378266	1378937	+	2.7.1.156	cobU	similar to AA sequence:UniProtKB:P0AE76	B12 biosynthesis	1	0	0	0	0	0	0
1228	PFR_JS15-1_1198	Adenosylcobinamide-GDP ribazoletransferase	1378897	1379718	+	PROKKA_01223	Cobalamin synthase	1378897	1379718	+	2.-.-.-	cobS	similar to AA sequence:UniProtKB:P36561	B12 biosynthesis	1	0	0	0	0	0	0
1229	PFR_JS15-1_1199	Transcriptional regulator, TetR family	1379812	1380426	+	PROKKA_01224	HTH-type transcriptional regulator TtgR	1379812	1380426	+		ttgR	similar to AA sequence:UniProtKB:Q9AIU0		1	0	0	0	0	0	0
1230	PFR_JS15-1_1200	ABC transporter related protein	1380423	1381235	+	PROKKA_01225	L-arabinose transporter ATP-binding protein	1380423	1381235	+			protein motif:CLUSTERS:PRK11288		1	0	0	0	0	0	0
1231	PFR_JS15-1_1201	Phage infection protein	1381240	1383447	+	PROKKA_01226	ABC-2 family transporter protein	1381240	1383447	+			protein motif:Pfam:PF12698.1		1	0	0	0	0	0	0
1232	PFR_JS15-1_1202	Inner membrane protein yhjD	1383420	1384850	-	PROKKA_01227	Inner membrane protein YhjD	1383420	1384850	-		yhjD	similar to AA sequence:UniProtKB:P37642		1	0	0	0	0	0	0
1233	PFR_JS15-1_1203	Glycine dehydrogenase	1384886	1387801	-	PROKKA_01228	Glycine dehydrogenase (decarboxylating)	1384886	1387801	-	1.4.4.2	gcvP	similar to AA sequence:UniProtKB:P74416		1	0	0	0	0	0	0
1234	PFR_JS15-1_1204	Transcriptional regulator	1387953	1388528	-	PROKKA_01229	HTH-type transcriptional regulator GlnR	1387953	1388528	-		glnR	similar to AA sequence:UniProtKB:P37582		1	0	0	0	0	0	0
1235	PFR_JS15-1_1205	Protein of hypothetical function DUF151	1388709	1389170	-	PROKKA_01230	hypothetical protein	1388709	1389170	-					1	0	0	0	0	0	0
1236	PFR_JS15-1_1206	Transcriptional regulator, MerR family	1389172	1389906	-	PROKKA_01231	zinc-responsive transcriptional regulator	1389172	1389906	-			protein motif:CLUSTERS:PRK09514		1	0	0	0	0	0	0
1237	PFR_JS15-1_1207	FHA domain protein	1389906	1390394	-	PROKKA_01232	Glycogen accumulation regulator GarA	1389906	1390394	-		garA	similar to AA sequence:UniProtKB:A0QYG2		1	0	0	0	0	0	0
1238	PFR_JS15-1_1208	Glycine cleavage system H protein	1390560	1390943	-	PROKKA_01233	Glycine cleavage system H protein	1390560	1390943	-		gcvH	similar to AA sequence:UniProtKB:P0A6T9		1	0	0	0	0	0	0
1239	PFR_JS15-1_1209	Division initiation protein	1391055	1391789	-	PROKKA_01234	hypothetical protein	1391055	1391789	-					1	0	0	0	0	0	0
1240	PFR_JS15-1_1210	Small basic protein	1391782	1392114	-	PROKKA_01235	hypothetical protein	1391782	1392114	-					1	0	0	0	0	0	0
1241	PFR_JS15-1_1211	PF05949 family protein	1392142	1392939	-	PROKKA_01236	hypothetical protein	1392142	1392939	-					1	0	0	0	0	0	0
1242	PFR_JS15-1_1212	Putative phosphatidylglycerophosphate synthase	1392990	1393667	-	PROKKA_01237	Putative CDP-diacylglycerol--glycerol-3-phosphate 3-phosphatidyl-transferase 2	1392990	1393667	-	2.7.8.5	pgsA2_1	similar to AA sequence:UniProtKB:O33288		1	0	0	0	0	0	0
1243	PFR_JS15-1_1213	Alpha-mannosyltransferase pimA	1393707	1394852	-	PROKKA_01238	GDP-mannose-dependent alpha-(1-2)-phosphatidylinositol mannosyltransferase	1393707	1394852	-	2.4.1.57	pimA	similar to AA sequence:UniProtKB:A0QWG6		1	0	0	0	0	0	0
1244	PFR_JS15-1_1214	Lipid A biosynthesis lauroyl acyltransferase	1394849	1395691	-	PROKKA_01239	Phosphatidylinositol mannoside acyltransferase	1394849	1395691	-	2.3.1.-		similar to AA sequence:UniProtKB:A0QWG5		1	0	0	0	0	0	0
1245	PFR_JS15-1_1215	Putative CDP-diacylglycerol--inositol	1395724	1396353	-	PROKKA_01240	CDP-diacylglycerol--inositol 3-phosphatidyltransferase	1395724	1396353	-	2.7.8.11	pgsA	similar to AA sequence:UniProtKB:Q9F7Y9		1	0	0	0	0	0	0
1246	PFR_JS15-1_1216	Histidine triad domain protein	1396346	1396951	-	PROKKA_01241	AP-4-A phosphorylase	1396346	1396951	-	2.7.7.53		similar to AA sequence:UniProtKB:O06201		1	0	0	0	0	0	0
1247	PFR_JS15-1_1217	Threonine--tRNA ligase (Precursor)	1396944	1398986	-	PROKKA_01242	Threonine--tRNA ligase	1396944	1398986	-	6.1.1.3	thrS	similar to AA sequence:UniProtKB:P56881		1	0	0	0	0	0	0
1248						PROKKA_01243	tRNA-Val(gac)	1399300	1399372	-			COORDINATES:profile:Aragorn:1.2		0					0	0
1249						PROKKA_01244	tRNA-Cys(gca)	1399373	1399444	-			COORDINATES:profile:Aragorn:1.2		0					0	0
1250						PROKKA_01245	tRNA-Gly(gcc)	1399505	1399578	-			COORDINATES:profile:Aragorn:1.2		0					0	0
1251						PROKKA_01246	tRNA-Val(cac)	1399982	1400055	+			COORDINATES:profile:Aragorn:1.2		0					0	0
1252	PFR_JS15-1_1218	Cobalamin biosynthesis protein CbiX	1400714	1401556	+	PROKKA_01247	sirohydrochlorin cobaltochelatase	1400714	1401556	+			protein motif:CLUSTERS:PRK00923		1	0	0	0	0	0	0
1253	PFR_JS15-1_1219	Polyphosphate:nucleotide phosphotransferase, PPK2	1401682	1402557	-	PROKKA_01248	Polyphosphate kinase 2 (PPK2)	1401682	1402557	-			protein motif:Pfam:PF03976.8		1	0	0	0	0	0	0
1254	PFR_JS15-1_1220	Peptide methionine sulfoxide reductase MsrB	1402705	1403157	+	PROKKA_01249	Peptide methionine sulfoxide reductase MsrB	1402705	1403157	+	1.8.4.12	msrB	similar to AA sequence:UniProtKB:Q3JRF0		1	0	0	0	0	0	0
1255	PFR_JS15-1_1221	Conserved hypothetical protein	1403181	1403705	+	PROKKA_01250	hypothetical protein	1403181	1403705	+			protein motif:CLUSTERS:PRK10670		1	0	0	0	0	0	0
1256	PFR_JS15-1_1222	Outer membrane receptor protein	1403791	1404390	+	PROKKA_01251	hypothetical protein	1403791	1404390	+					1	0	0	0	0	0	0
1257	PFR_JS15-1_1223	Ribonuclease D	1404459	1405724	+	PROKKA_01252	Ribonuclease D	1404459	1405724	+	3.1.13.5	rnd	similar to AA sequence:UniProtKB:P09155		1	0	0	0	0	0	0
1258	PFR_JS15-1_1224	1-deoxy-D-xylulose 5-phosphate synthase dxs1	1405776	1407791	-	PROKKA_01253	1-deoxy-D-xylulose-5-phosphate synthase	1405776	1407791	-	2.2.1.7	dxs	similar to AA sequence:UniProtKB:Q9RBN6		1	0	0	0	0	0	0
1259	PFR_JS15-1_1225	Hypothetical protein	1407842	1408372	-	PROKKA_01254	hypothetical protein	1407842	1408372	-					1	0	0	0	0	0	0
1260	PFR_JS15-1_1226	Hypothetical protein	1408522	1408824	-	PROKKA_01255	hypothetical protein	1408522	1408824	-					1	0	0	0	0	0	0
1261	PFR_JS15-1_1227	Aconitate hydratase 1	1408936	1411608	-	PROKKA_01256	Aconitate hydratase	1408936	1411608	-	4.2.1.3	acnA	similar to AA sequence:UniProtKB:A0QX20		1	0	0	0	0	0	0
1262	PFR_JS15-1_1228	Alpha-ketoglutarate transporter, MFS super	1411947	1413293	-	PROKKA_01257	Alpha-ketoglutarate permease	1411947	1413293	-		kgtP_2	similar to AA sequence:UniProtKB:P0AEX3		1	0	0	0	0	0	0
1263	PFR_JS15-1_1229	Glutathione S-transferase domain protein	1413401	1414429	-	PROKKA_01258	Glutathionyl-hydroquinone reductase YqjG	1413401	1414429	-	1.8.-.-	yqjG_1	similar to AA sequence:UniProtKB:P42620		0	0	0	0	0	0	0
1264	PFR_JS15-1_1230	Cysteine synthase	1414921	1415895	+	PROKKA_01259	O-acetylserine sulfhydrylase	1414921	1415895	+	2.5.1.47	cysK1_2	similar to AA sequence:UniProtKB:P0A534		0	0	0	0	0	0	0
1265	PFR_JS15-1_1231	GCN5 N-acetyltransferase	1415892	1416542	+	PROKKA_01260	putative acetyltransferase	1415892	1416542	+			protein motif:CLUSTERS:PRK03624		1	0	0	0	0	0	0
1266	PFR_JS15-1_1232	Possible glutathione transferase	1416539	1417096	+	PROKKA_01261	Glutathionyl-hydroquinone reductase YqjG	1416539	1417096	+	1.8.-.-	yqjG_2	similar to AA sequence:UniProtKB:P42620		0	0	0	0	0	0	0
1267	PFR_JS15-1_1233	Hypothetical protein	1417066	1417599	+	PROKKA_01262	Glutathionyl-hydroquinone reductase YqjG	1417066	1417599	+	1.8.-.-	yqjG_3	similar to AA sequence:UniProtKB:P42620		1	0	0	0	0	0	0
1268	PFR_JS15-1_1234	Hypothetical protein	1417634	1417894	-	PROKKA_01263	hypothetical protein	1417634	1417894	-					1	0	0	0	0	0	0
1269	PFR_JS15-1_1235	Putative 23S rRNA (Uracil-5-)-methyltransferase	1417891	1419069	-	PROKKA_01264	putative RNA methyltransferase/cg2084	1417891	1419069	-	2.1.1.-		similar to AA sequence:UniProtKB:Q6M4B7		1	0	0	0	0	0	0
1270	PFR_JS15-1_1236	Conserved alanine, valine and leucine rich	1419066	1421060	-	PROKKA_01265	hypothetical protein	1419066	1421060	-					1	0	0	0	0	0	0
1271	PFR_JS15-1_1237	Trk system potassium uptake protein TrkA	1421233	1421895	+	PROKKA_01266	Trk system potassium uptake protein TrkA	1421233	1421895	+		trkA_1	similar to AA sequence:UniProtKB:P0AGI8		1	0	0	0	0	0	0
1272	PFR_JS15-1_1238	TrkB	1421909	1422577	+	PROKKA_01267	Trk system potassium uptake protein TrkA	1421909	1422577	+		trkA_2	similar to AA sequence:UniProtKB:P0AGI8		1	0	0	0	0	0	0
1273	PFR_JS15-1_1239	Nucleic acid-binding domain protein	1422584	1422964	-	PROKKA_01268	hypothetical protein	1422584	1422964	-					1	0	0	0	0	0	0
1274	PFR_JS15-1_1240	PF12502 family protein	1422961	1423782	-	PROKKA_01269	hypothetical protein	1422961	1423782	-					1	0	0	0	0	0	0
1275	PFR_JS15-1_1241	Hypothetical protein	1424072	1424392	+	PROKKA_01270	hypothetical protein	1424072	1424392	+					1	0	0	0	0	0	0
1276	PFR_JS15-1_1242	PF13834 domain protein	1424504	1424878	-	PROKKA_01271	hypothetical protein	1424504	1424878	-					1	0	0	0	0	0	0
1277	PFR_JS15-1_1243	Hypothetical protein	1425094	1426422	+	PROKKA_01272	hypothetical protein	1425094	1426422	+					1	0	0	0	0	0	0
1278	PFR_JS15-1_1244	Type I phosphodiesterase / nucleotide	1426525	1427676	-	PROKKA_01273	Type I phosphodiesterase / nucleotide pyrophosphatase	1426525	1427676	-			protein motif:Pfam:PF01663.16		1	0	0	0	0	0	0
1279	PFR_JS15-1_1245	Phosphodiesterase I	1427680	1428273	-	PROKKA_01274	hypothetical protein	1427680	1428273	-					1	0	0	0	0	0	0
1280	PFR_JS15-1_1246	PF09949 family protein	1428329	1429414	+	PROKKA_01275	hypothetical protein	1428329	1429414	+					1	0	0	0	0	0	0
1281	PFR_JS15-1_1247	DNA gyrase/topoisomerase IV, A subunit	1429540	1432002	+	PROKKA_01276	DNA gyrase subunit A	1429540	1432002	+	5.99.1.3	gyrA_2	similar to AA sequence:UniProtKB:Q2G2Q0		1	0	0	0	0	0	0
1282	PFR_JS15-1_1248	2-dehydropantoate 2-reductase (Ketopantoate	1432108	1433025	+	PROKKA_01277	2-dehydropantoate 2-reductase	1432108	1433025	+			protein motif:CLUSTERS:PRK06522		1	0	0	0	0	0	0
1283	PFR_JS15-1_1249	DNA gyrase, B subunit	1433050	1435170	-	PROKKA_01278	DNA topoisomerase 4 subunit B	1433050	1435170	-	5.99.1.3	parE	similar to AA sequence:UniProtKB:P66939		1	0	0	0	0	0	0
1284	PFR_JS15-1_1250	Hypothetical protein	1435333	1435524	+	PROKKA_01279	hypothetical protein	1435333	1435524	+					1	0	0	0	0	0	0
1285	PFR_JS15-1_1251	L-lactate dehydrogenase 1 (Precursor)	1435670	1436635	+	PROKKA_01280	L-lactate dehydrogenase 2	1435670	1436635	+	1.1.1.27	ldh2	similar to AA sequence:UniProtKB:P0CW93		1	0	0	0	0	0	0
1286	PFR_JS15-1_1252	RNA polymerase sigma factor	1436723	1438252	-	PROKKA_01281	RNA polymerase principal sigma factor HrdB	1436723	1438252	-		hrdB	similar to AA sequence:UniProtKB:P18183		1	0	0	0	0	0	0
1287	PFR_JS15-1_1253	RNA polymerase sigma factor SigB	1438611	1439540	+	PROKKA_01282	RNA polymerase sigma factor SigB	1438611	1439540	+		sigB	similar to AA sequence:UniProtKB:Q59563		1	0	0	0	0	0	0
1288	PFR_JS15-1_1254	Lac repressor	1439643	1440146	-	PROKKA_01283	HTH-type transcriptional repressor CytR	1439643	1440146	-		cytR	similar to AA sequence:UniProtKB:P0ACN7		1	0	0	0	0	0	0
1289	PFR_JS15-1_1255	Transcriptional regulator, LacI family	1440150	1440632	-	PROKKA_01284	Catabolite control protein A	1440150	1440632	-		ccpA_2	similar to AA sequence:UniProtKB:P46828		0	0	0	0	0	0	0
1290	PFR_JS15-1_1256	ABC transporter	1440930	1441409	+	PROKKA_01285	Bacterial extracellular solute-binding protein	1440930	1441409	+			protein motif:Pfam:PF01547.19		0	0	0	0	0	0	0
1291	PFR_JS15-1_1257	Solute binding protein of ABC transporter system	1441378	1442271	+	PROKKA_01286	putative arabinose-binding protein precursor	1441378	1442271	+		araN	similar to AA sequence:UniProtKB:P94528		0	0	0	0	0	0	0
1292	PFR_JS15-1_1258	Putative acyl-CoA thioesterase II	1442284	1443159	-	PROKKA_01287	Acyl-CoA thioesterase 2	1442284	1443159	-	3.1.2.-	tesB	similar to AA sequence:UniProtKB:P0AGG2		1	0	0	0	0	0	0
1293	PFR_JS15-1_1259	ATP-dependent helicase HrpA	1443267	1447235	-	PROKKA_01288	ATP-dependent RNA helicase HrpB	1443267	1447235	-	3.6.4.13	hrpB_2	similar to AA sequence:UniProtKB:P37024		0	0	0	0	0	0	0
1294	PFR_JS15-1_1260	Transposase IS6110	1447298	1448185	-	PROKKA_01289	Integrase core domain protein	1447298	1448185	-			protein motif:Pfam:PF00665.20		0	0	0	0	0	0	0
1295	PFR_JS15-1_1261	IS3 family element	1448218	1448562	-	PROKKA_01290	Transposase	1448218	1448562	-			protein motif:Pfam:PF01527.14		0	0	0	0	0	0	0
1296	PFR_JS15-1_1262	Probable phosphoketolase	1448726	1451356	-	PROKKA_01291	Xylulose-5-phosphate phosphoketolase	1448726	1451356	-	4.1.2.9	xpkA	similar to AA sequence:UniProtKB:Q937F6		1	0	0	0	0	0	0
1297	PFR_JS15-1_1263	Putative AEC family transporter	1451416	1452351	-	PROKKA_01292	Membrane transport protein	1451416	1452351	-			protein motif:Pfam:PF03547.12		1	0	0	0	0	0	0
1298	PFR_JS15-1_1264	Sugar-binding family transcriptional regulator	1452539	1453507	+	PROKKA_01293	Deoxyribonucleoside regulator	1452539	1453507	+		deoR	similar to AA sequence:UniProtKB:P39140		1	0	0	0	0	0	0
1299	PFR_JS15-1_1265	Anaerobic glycerol-3-phosphate dehydrogenase	1453590	1454981	-	PROKKA_01294	Anaerobic glycerol-3-phosphate dehydrogenase subunit C	1453590	1454981	-		glpC	similar to AA sequence:UniProtKB:P0A996		1	0	0	0	0	0	0
1300	PFR_JS15-1_1266	Glycerol-3-phosphate dehydrogenase [NAD(P) ] B	1454978	1456288	-	PROKKA_01295	Anaerobic glycerol-3-phosphate dehydrogenase subunit B	1454978	1456288	-	1.1.5.3	glpB	similar to AA sequence:UniProtKB:P13033		1	0	0	0	0	0	0
1301	PFR_JS15-1_1267	Glycerol-3-phosphate dehydrogenase [NAD(P) ] A	1456285	1457913	-	PROKKA_01296	Anaerobic glycerol-3-phosphate dehydrogenase subunit A	1456285	1457913	-	1.1.5.3	glpA	similar to AA sequence:UniProtKB:P0A9C0		1	0	0	0	0	0	0
1302	PFR_JS15-1_1268	Phospholipase, patatin family	1458105	1459046	+	PROKKA_01297	NTE family protein RssA	1458105	1459046	+		rssA	similar to AA sequence:UniProtKB:P0AFR0		1	0	0	0	0	0	0
1303	PFR_JS15-1_1269	Vitamin B12-dependent ribonucleotide reductase	1459155	1462046	-	PROKKA_01298	Vitamin B12-dependent ribonucleotide reductase	1459155	1462046	-	1.17.4.1	nrdJ	similar to AA sequence:UniProtKB:O69981		1	0	0	0	0	0	0
1304	PFR_JS15-1_1270	Transcriptional repressor NrdR	1462232	1462729	-	PROKKA_01299	Transcriptional repressor NrdR	1462232	1462729	-		nrdR	similar to AA sequence:UniProtKB:O69980		1	0	0	0	0	0	0
1305	PFR_JS15-1_1271	Hypothetical protein	1463064	1463849	-	PROKKA_01300	hypothetical protein	1463064	1463849	-					1	0	0	0	0	0	0
1306	PFR_JS15-1_1272	LexA repressor	1464119	1464961	+	PROKKA_01301	LexA repressor	1464119	1464961	+	3.4.21.88	lexA_1	similar to AA sequence:UniProtKB:Q50765		1	0	0	0	0	0	0
1307	PFR_JS15-1_1273	ATP-dependent helicase DinG	1464965	1467028	-	PROKKA_01302	putative ATP-dependent helicase DinG	1464965	1467028	-	3.6.4.12	dinG	similar to AA sequence:UniProtKB:P27296		1	0	0	0	0	0	0
1308	PFR_JS15-1_1274	GTPase HflX	1467195	1468631	-	PROKKA_01303	GTPase HflX	1467195	1468631	-		hflX	similar to AA sequence:UniProtKB:P25519		1	0	0	0	0	0	0
1309	PFR_JS15-1_1275	Diaminopimelate epimerase	1468675	1469517	-	PROKKA_01304	Diaminopimelate epimerase	1468675	1469517	-	5.1.1.7	dapF	similar to AA sequence:UniProtKB:A4QEV1		1	0	0	0	0	0	0
1310	PFR_JS15-1_1276	TRNA dimethylallyltransferase	1469532	1470518	-	PROKKA_01305	tRNA dimethylallyltransferase	1469532	1470518	-	2.5.1.75	miaA	similar to AA sequence:UniProtKB:Q9KAC3		1	0	0	0	0	0	0
1311	PFR_JS15-1_1277	(Dimethylallyl)adenosine tRNA	1470515	1472029	-	PROKKA_01306	(Dimethylallyl)adenosine tRNA methylthiotransferase MiaB	1470515	1472029	-	2.-.-.-	miaB	similar to AA sequence:UniProtKB:O31778		1	0	0	0	0	0	0
1312	PFR_JS15-1_1278	Glutamate uptake system ATP-binding protein	1472133	1472948	+	PROKKA_01307	Glutamine transport ATP-binding protein GlnQ	1472133	1472948	+		glnQ_1	similar to AA sequence:UniProtKB:P27675		1	0	0	0	0	0	0
1313	PFR_JS15-1_1279	Ribonuclease Y	1472958	1474493	-	PROKKA_01308	Ribonuclease Y	1472958	1474493	-	3.1.-.-	rny	similar to AA sequence:UniProtKB:P67278		1	0	0	0	0	0	0
1314	PFR_JS15-1_1280	Regulatory protein RecX	1474655	1475269	-	PROKKA_01309	Regulatory protein RecX	1474655	1475269	-		recX	similar to AA sequence:UniProtKB:P0A5U8		1	0	0	0	0	0	0
1315	PFR_JS15-1_1281	Protein RecA 2	1475272	1476390	-	PROKKA_01310	recombinase A	1475272	1476390	-			protein motif:CLUSTERS:PRK09354		1	0	0	0	0	0	0
1316	PFR_JS15-1_1282	Hypothetical protein	1476699	1476866	+	PROKKA_01311	hypothetical protein	1476699	1476866	+					1	0	0	0	0	0	0
1317	PFR_JS15-1_1283	Putative ATP-DEPENDENT HELICASE LHR	1476970	1481649	+	PROKKA_01312	putative ATP-dependent helicase Lhr	1476970	1481649	+			protein motif:CLUSTERS:PRK09751		1	0	0	0	0	0	0
1318	PFR_JS15-1_1284	Transcriptional regulator	1481871	1482176	-	PROKKA_01313	Transcriptional regulator ClgR	1481871	1482176	-		clgR	similar to AA sequence:UniProtKB:A0QVU1		1	0	0	0	0	0	0
1319	PFR_JS15-1_1285	CinA domain protein	1482344	1482847	-	PROKKA_01314	Nicotinamide-nucleotide amidohydrolase PncC	1482344	1482847	-	3.5.1.42	pncC	similar to AA sequence:UniProtKB:P0A6G3		1	0	0	0	0	0	0
1320	PFR_JS15-1_1286	Phosphatidylglycerophosphate synthase pgsA3	1482840	1483493	-	PROKKA_01315	Putative CDP-diacylglycerol--glycerol-3-phosphate 3-phosphatidyl-transferase 2	1482840	1483493	-	2.7.8.5	pgsA2_2	similar to AA sequence:UniProtKB:O33288		1	0	0	0	0	0	0
1321	PFR_JS15-1_1287	Ribosomal protein S12 methylthiotransferase RimO	1483498	1484931	-	PROKKA_01316	Ribosomal protein S12 methylthiotransferase RimO	1483498	1484931	-	2.-.-.-	rimO	similar to AA sequence:UniProtKB:Q9X2H6		1	0	0	0	0	0	0
1322	PFR_JS15-1_1288	FtsK	1485011	1487320	-	PROKKA_01317	DNA translocase SpoIIIE	1485011	1487320	-		spoIIIE	similar to AA sequence:UniProtKB:P21458		1	0	0	0	0	0	0
1323	PFR_JS15-1_1289	Thiamine monophosphate kinase	1487566	1488549	-	PROKKA_01318	Thiamine-monophosphate kinase	1487566	1488549	-	2.7.4.16	thiL	similar to AA sequence:UniProtKB:O67883		1	0	0	0	0	0	0
1324	PFR_JS15-1_1290	Putative dihydroxyacetone kinase regulator	1488560	1489294	-	PROKKA_01319	HTH-type dhaKLM operon transcriptional activator DhaS	1488560	1489294	-		dhaS	similar to AA sequence:UniProtKB:Q9CIV9		1	0	0	0	0	0	0
1325	PFR_JS15-1_1291	Conserved hypothetical membrane spanning protein	1489404	1490399	+	PROKKA_01320	hypothetical protein	1489404	1490399	+					1	0	0	0	0	0	0
1326	PFR_JS15-1_1292	D-alanine-D-alanine ligase A	1490438	1491565	-	PROKKA_01321	D-alanine--D-alanine ligase	1490438	1491565	-	6.3.2.4	ddl	similar to AA sequence:UniProtKB:P95114		1	0	0	0	0	0	0
1327	PFR_JS15-1_1293	1-acylglycerol-3-phosphate O-acyltransferase,	1491639	1492442	-	PROKKA_01322	2-acyl-glycerophospho-ethanolamine acyltransferase	1491639	1492442	-			protein motif:CLUSTERS:PRK08633		1	0	0	0	0	0	0
1328	PFR_JS15-1_1294	3-isopropylmalate dehydratase small subunit	1492574	1493170	-	PROKKA_01323	3-isopropylmalate dehydratase small subunit	1492574	1493170	-	4.2.1.33	leuD	similar to AA sequence:UniProtKB:Q8NQV7		1	0	0	0	0	0	0
1329	PFR_JS15-1_1295	3-isopropylmalate dehydratase large subunit	1493184	1494593	-	PROKKA_01324	3-isopropylmalate dehydratase large subunit	1493184	1494593	-	4.2.1.33	leuC	similar to AA sequence:UniProtKB:Q7TXH6		1	0	0	0	0	0	0
1330	PFR_JS15-1_1296	Transcriptional regulator, IclR family protein	1494637	1495365	+	PROKKA_01325	HTH-type transcriptional regulator KipR	1494637	1495365	+		kipR	similar to AA sequence:UniProtKB:P42968		1	0	0	0	0	0	0
1331						PROKKA_01326	tRNA-Glu(ctc)	1495464	1495537	-			COORDINATES:profile:Aragorn:1.2		0					0	0
1332						PROKKA_01327	tRNA-Gln(ctg)	1495630	1495702	-			COORDINATES:profile:Aragorn:1.2		0					0	0
1333	PFR_JS15-1_1297	CAAX amino terminal protease family protein	1495767	1496861	-	PROKKA_01328	CAAX amino terminal protease self- immunity	1495767	1496861	-			protein motif:Pfam:PF02517.10		1	0	0	0	0	0	0
1334	PFR_JS15-1_1298	FAH family protein	1496869	1497714	-	PROKKA_01329	Ureidoglycolate lyase	1496869	1497714	-	4.3.2.3		similar to AA sequence:UniProtKB:Q39BA7		1	0	0	0	0	0	0
1335	PFR_JS15-1_1299	Putative alpha-isopropylmalate/homocitrate	1497774	1499372	-	PROKKA_01330	2-isopropylmalate synthase	1497774	1499372	-	2.3.3.13	leuA_2	similar to AA sequence:UniProtKB:P09151		1	0	0	0	0	0	0
1336	PFR_JS15-1_1300	Branched-chain-amino-acid transaminase	1499404	1500489	-	PROKKA_01331	Branched-chain-amino-acid aminotransferase	1499404	1500489	-	2.6.1.42	ilvE_2	similar to AA sequence:UniProtKB:A0R066		1	0	0	0	0	0	0
1337	PFR_JS15-1_1301	Tartrate dehydrogenase	1500655	1501719	+	PROKKA_01332	3-isopropylmalate dehydrogenase	1500655	1501719	+	1.1.1.85	leuB	similar to AA sequence:UniProtKB:P95313		1	0	0	0	0	0	0
1338	PFR_JS15-1_1302	Hypothetical protein	1502007	1502594	+	PROKKA_01333	hypothetical protein	1502007	1502594	+					0	0	0	0	0	0	0
1339	PFR_JS15-1_1303	Hypothetical protein	1502576	1503439	+	PROKKA_01334	hypothetical protein	1502576	1503439	+					1	0	0	0	0	0	0
1340	PFR_JS15-1_1304	Ketol-acid reductoisomerase 2	1503598	1504629	-	PROKKA_01335	Ketol-acid reductoisomerase	1503598	1504629	-	1.1.1.86	ilvC	similar to AA sequence:UniProtKB:A0QUX8		1	0	0	0	0	0	0
1341	PFR_JS15-1_1305	Acetolactate synthase, small subunit	1504674	1505201	-	PROKKA_01336	Putative acetolactate synthase small subunit	1504674	1505201	-	2.2.1.6	ilvH	similar to AA sequence:UniProtKB:P65161		1	0	0	0	0	0	0
1342	PFR_JS15-1_1306	Acetolactate synthase	1505198	1506958	-	PROKKA_01337	Acetolactate synthase large subunit	1505198	1506958	-	2.2.1.6	ilvB	similar to AA sequence:UniProtKB:P42463		1	0	0	0	0	0	0
1343	PFR_JS15-1_1307	Hypothetical protein	1507257	1508282	-	PROKKA_01338	hypothetical protein	1507257	1508282	-					1	0	0	0	0	0	0
1344	PFR_JS15-1_1308	Imidazole glycerol phosphate synthase subunit	1508467	1509231	-	PROKKA_01339	Imidazole glycerol phosphate synthase subunit HisF	1508467	1509231	-	4.1.3.-	hisF	similar to AA sequence:UniProtKB:O31139		1	0	0	0	0	0	0
1345	PFR_JS15-1_1309	Potassium channel beta chain	1509316	1510332	+	PROKKA_01340	L-glyceraldehyde 3-phosphate reductase	1509316	1510332	+	1.1.1.-	gpr_1	similar to AA sequence:UniProtKB:Q46851		1	0	0	0	0	0	0
1346	PFR_JS15-1_1310	Antibiotic biosynthesis monooxygenase	1510447	1510824	-	PROKKA_01341	Putative monooxygenase YcnE	1510447	1510824	-	1.-.-.-	ycnE	similar to AA sequence:UniProtKB:P94425		1	0	0	0	0	0	0
1347	PFR_JS15-1_1311	DSH domain protein	1510836	1513637	-	PROKKA_01342	ski2-like helicase	1510836	1513637	-			protein motif:CLUSTERS:PRK02362		1	0	0	0	0	0	0
1348	PFR_JS15-1_1312	Phosphatase YidA	1513773	1514630	+	PROKKA_01343	Sugar phosphatase YidA	1513773	1514630	+	3.1.3.23	yidA	similar to AA sequence:UniProtKB:P0A8Y5		1	0	0	0	0	0	0
1349	PFR_JS15-1_1313	Hypothetical protein	1514671	1514850	-	PROKKA_01344	diacylglycerol kinase	1514671	1514850	-			protein motif:CLUSTERS:PRK11914		0	0	0	0	0	0	0
1350	PFR_JS15-1_1314	Transposase of ISAar20, ISL3 family	1514887	1515852	-	PROKKA_01345	Transposase	1514887	1515852	-			protein motif:Pfam:PF01610.11		0	0	0	0	0	0	0
1351	PFR_JS15-1_1315	Diacylglycerol kinase DagK	1516253	1517128	-	PROKKA_01346	Diacylglycerol kinase	1516253	1517128	-	2.7.1.107	dagK_1	similar to AA sequence:UniProtKB:O53526		1	0	0	0	0	0	0
1352	PFR_JS15-1_1316	Twin arginine-targeting protein translocase TatC	1517144	1518016	-	PROKKA_01347	Sec-independent protein translocase protein TatC	1517144	1518016	-		tatC	similar to AA sequence:UniProtKB:O67305		1	0	0	0	0	0	0
1353	PFR_JS15-1_1317	Sec-independent protein translocase protein TatA	1518035	1518343	-	PROKKA_01348	Sec-independent protein translocase protein TatAy	1518035	1518343	-		tatAy	similar to AA sequence:UniProtKB:O05522		1	0	0	0	0	0	0
1354	PFR_JS15-1_1318	Protein pafC	1518445	1519404	-	PROKKA_01349	hypothetical protein	1518445	1519404	-					1	0	0	0	0	0	0
1355	PFR_JS15-1_1319	Protein pafB	1519391	1520359	-	PROKKA_01350	hypothetical protein	1519391	1520359	-					1	0	0	0	0	0	0
1356	PFR_JS15-1_1320	TRNA synthetase class I, catalytic domain	1520428	1521387	+	PROKKA_01351	Glutamyl-Q tRNA(Asp) synthetase	1520428	1521387	+	6.1.1.-	gluQ	similar to AA sequence:UniProtKB:P27305		1	0	0	0	0	0	0
1357	PFR_JS15-1_1321	Peptidylprolyl isomerase	1521530	1522588	-	PROKKA_01352	FK506-binding protein	1521530	1522588	-	5.2.1.8	fkbP_2	similar to AA sequence:UniProtKB:P28725		1	0	0	0	0	0	0
1358	PFR_JS15-1_1322	Hypothetical protein	1522674	1523315	-	PROKKA_01353	FK506-binding protein	1522674	1523315	-	5.2.1.8	fkbP_3	similar to AA sequence:UniProtKB:P28725		1	0	0	0	0	0	0
1359	PFR_JS15-1_1323	Pseudouridylate synthase	1523381	1524163	-	PROKKA_01354	Ribosomal large subunit pseudouridine synthase B	1523381	1524163	-	5.4.99.22	rluB	similar to AA sequence:UniProtKB:P35159		1	0	0	0	0	0	0
1360	PFR_JS15-1_1324	Transcriptional regulator	1524156	1524911	-	PROKKA_01355	Segregation and condensation protein B	1524156	1524911	-		scpB	similar to AA sequence:UniProtKB:C1CMI5		1	0	0	0	0	0	0
1361	PFR_JS15-1_1325	Condensin subunit ScpA	1524908	1525822	-	PROKKA_01356	Segregation and condensation protein A	1524908	1525822	-		scpA	similar to AA sequence:UniProtKB:P35154		1	0	0	0	0	0	0
1362	PFR_JS15-1_1326	Hypothetical protein	1525803	1526078	-	PROKKA_01357	hypothetical protein	1525803	1526078	-					1	0	0	0	0	0	0
1363	PFR_JS15-1_1327	Sporulation initiation inhibitor protein Soj	1526063	1526959	-	PROKKA_01358	Sporulation initiation inhibitor protein Soj	1526063	1526959	-	3.6.-.-	soj_1	similar to AA sequence:UniProtKB:P37522		1	0	0	0	0	0	0
1364	PFR_JS15-1_1328	Tyrosine recombinase XerC 2	1527080	1528075	-	PROKKA_01359	Tyrosine recombinase XerD	1527080	1528075	-		xerD_1	similar to AA sequence:UniProtKB:P0A0P0		1	0	0	0	0	0	0
1365	PFR_JS15-1_1329	Hydrolase, NUDIX family	1528068	1528730	-	PROKKA_01360	ADP-ribose pyrophosphatase	1528068	1528730	-	3.6.1.13	nudF	similar to AA sequence:UniProtKB:P54570		1	0	0	0	0	0	0
1366	PFR_JS15-1_1330	CTP synthase	1528723	1530477	-	PROKKA_01361	CTP synthase	1528723	1530477	-	6.3.4.2	pyrG	similar to AA sequence:UniProtKB:A0QYQ7		1	0	0	0	0	0	0
1367	PFR_JS15-1_1331	DNA repair protein RecN	1530564	1532255	-	PROKKA_01362	DNA repair protein RecN	1530564	1532255	-		recN	similar to AA sequence:UniProtKB:Q9WXF2		1	0	0	0	0	0	0
1368	PFR_JS15-1_1332	Probable inorganic polyphosphate/ATP-NAD kinase	1532249	1533172	-	PROKKA_01363	Inorganic polyphosphate/ATP-NAD kinase	1532249	1533172	-	2.7.1.23	ppnK	similar to AA sequence:UniProtKB:P0A5S6		1	0	0	0	0	0	0
1369	PFR_JS15-1_1333	Hypothetical protein	1533237	1533476	-	PROKKA_01364	hypothetical protein	1533237	1533476	-					1	0	0	0	0	0	0
1370	PFR_JS15-1_1334	Cobalt transport protein	1533549	1534157	-	PROKKA_01365	Energy-coupling factor transporter transmembrane protein BioN	1533549	1534157	-		bioN	similar to AA sequence:UniProtKB:Q2KBP6		1	0	0	0	0	0	0
1371	PFR_JS15-1_1335	Biotin ABC transport system ATP-binding protein	1534154	1534882	-	PROKKA_01366	Biotin transport ATP-binding protein BioM	1534154	1534882	-	3.6.3.-	bioM	similar to AA sequence:UniProtKB:Q2KBP5		1	0	0	0	0	0	0
1372	PFR_JS15-1_1336	BioY family protein	1534896	1535525	-	PROKKA_01367	Biotin transporter BioY	1534896	1535525	-		bioY	similar to AA sequence:UniProtKB:Q2KBP7		1	0	0	0	0	0	0
1373	PFR_JS15-1_1337	HAD-superfamily hydrolase, subfamily IIA	1535714	1536745	-	PROKKA_01368	putative hydrolase YutF	1535714	1536745	-	3.-.-.-	yutF	similar to AA sequence:UniProtKB:O32125		1	0	0	0	0	0	0
1374	PFR_JS15-1_1338	Hypothetical protein	1536742	1537767	-	PROKKA_01369	hypothetical protein	1536742	1537767	-					0	0	0	0	0	0	0
1375	PFR_JS15-1_1339	Hypothetical protein	1537842	1539029	-	PROKKA_01370	hypothetical protein	1537842	1539029	-					0	1	1	0	0	0	0
1376	PFR_JS15-1_1340	Hypothetical protein	1541833	1542828	+	PROKKA_01371	hypothetical protein	1541833	1542828	+					0	1	1	0	0	0	0
1377	PFR_JS15-1_1341	Tyrosyl-tRNA synthase tyrS	1544781	1546049	-	PROKKA_01372	Tyrosine--tRNA ligase	1544781	1546049	-	6.1.1.1	tyrS	similar to AA sequence:UniProtKB:P67611		1	0	0	0	0	0	0
1378	PFR_JS15-1_1342	Argininosuccinate lyase	1546177	1547598	-	PROKKA_01373	Argininosuccinate lyase	1546177	1547598	-	4.3.2.1	argH	similar to AA sequence:UniProtKB:A0QYS5		1	0	0	0	0	0	0
1379	PFR_JS15-1_1343	Arginine repressor	1547602	1548156	-	PROKKA_01374	Arginine repressor	1547602	1548156	-		argR	similar to AA sequence:UniProtKB:P0A4Y8		1	0	0	0	0	0	0
1380	PFR_JS15-1_1344	Acetylornithine transaminase	1548153	1549376	-	PROKKA_01375	Acetylornithine aminotransferase	1548153	1549376	-	2.6.1.11	argD	similar to AA sequence:UniProtKB:A0QYS9		0	0	0	0	0	0	0
1381	PFR_JS15-1_1345	Acetylglutamate kinase	1549369	1550280	-	PROKKA_01376	Acetylglutamate kinase	1549369	1550280	-	2.7.2.8	argB	similar to AA sequence:UniProtKB:A0QYT0		1	0	0	0	0	0	0
1382	PFR_JS15-1_1346	Arginine biosynthesis bifunctional protein ArgJ	1550277	1551428	-	PROKKA_01377	Arginine biosynthesis bifunctional protein ArgJ	1550277	1551428	-		argJ	similar to AA sequence:UniProtKB:Q8CK24		1	0	0	0	0	0	0
1383	PFR_JS15-1_1347	N-acetyl-gamma-glutamyl-phosphate reductase ArgC	1551425	1552456	-	PROKKA_01378	N-acetyl-gamma-glutamyl-phosphate reductase	1551425	1552456	-	1.2.1.38	argC	similar to AA sequence:UniProtKB:P63562		1	0	0	0	0	0	0
1384	PFR_JS15-1_1348	Aminotransferase AlaT	1552621	1553835	+	PROKKA_01379	Glutamate-pyruvate aminotransferase AlaA	1552621	1553835	+	2.6.1.2	alaA	similar to AA sequence:UniProtKB:P0A959		1	0	0	0	0	0	0
1385	PFR_JS15-1_1349	Phenylalanine--tRNA ligase beta subunit	1553963	1556491	-	PROKKA_01380	Phenylalanine--tRNA ligase beta subunit	1553963	1556491	-	6.1.1.20	pheT	similar to AA sequence:UniProtKB:P67041		1	0	0	0	0	0	0
1386	PFR_JS15-1_1350	Phenylalanine--tRNA ligase alpha subunit	1556488	1557582	-	PROKKA_01381	Phenylalanine--tRNA ligase alpha subunit	1556488	1557582	-	6.1.1.20	pheS	similar to AA sequence:UniProtKB:Q8NQN7		1	0	0	0	0	0	0
1387	PFR_JS15-1_1351	Hypothetical protein	1557738	1557914	-	PROKKA_01382	hypothetical protein	1557738	1557914	-					1	0	0	0	0	0	0
1388	PFR_JS15-1_1352	RNA 2'-O ribose methyltransferase substrate	1557914	1558774	-	PROKKA_01383	23S rRNA (uridine(2479)-2'-O)-methyltransferase	1557914	1558774	-	2.1.1.208	aviRb	similar to AA sequence:UniProtKB:Q9F5K6		1	0	0	0	0	0	0
1389	PFR_JS15-1_1353	50S ribosomal protein L20	1558785	1559156	-	PROKKA_01384	50S ribosomal protein L20	1558785	1559156	-		rplT	similar to AA sequence:UniProtKB:A0QYU6		1	0	0	0	0	0	0
1390	PFR_JS15-1_1354	50S ribosomal protein L35	1559202	1559396	-	PROKKA_01385	50S ribosomal protein L35	1559202	1559396	-		rpmI	similar to AA sequence:UniProtKB:P80341		1	0	0	0	0	0	0
1391	PFR_JS15-1_1355	Translation initiation factor IF-3	1559464	1560192	-	PROKKA_01386	Translation initiation factor IF-3	1559464	1560192	-		infC	similar to AA sequence:UniProtKB:Q5SKU2		1	0	0	0	0	0	0
1392	PFR_JS15-1_1356	Hypothetical protein	1560498	1560980	+	PROKKA_01387	hypothetical protein	1560498	1560980	+					1	0	0	0	0	0	0
1393	PFR_JS15-1_1357	ATP phosphoribosyltransferase	1561044	1561907	-	PROKKA_01388	ATP phosphoribosyltransferase	1561044	1561907	-	2.4.2.17	hisG	similar to AA sequence:UniProtKB:P60759		1	0	0	0	0	0	0
1394	PFR_JS15-1_1358	Phosphoribosyl-AMP pyrophosphatase hisE	1561974	1562240	-	PROKKA_01389	Phosphoribosyl-ATP pyrophosphatase	1561974	1562240	-	3.6.1.31	hisE	similar to AA sequence:UniProtKB:P0A5B1		1	0	0	0	0	0	0
1395	PFR_JS15-1_1359	ATP-dependent zinc metalloprotease FtsH	1562413	1564563	+	PROKKA_01390	ATP-dependent zinc metalloprotease FtsH	1562413	1564563	+	3.4.24.-	ftsH	similar to AA sequence:UniProtKB:P0AAI3		1	0	0	0	0	0	0
1396	PFR_JS15-1_1360	Cysteine--tRNA ligase 3	1564673	1565929	-	PROKKA_01391	L-cysteine:1D-myo-inositol 2-amino-2-deoxy-alpha-D-glucopyranoside ligase	1564673	1565929	-	6.3.1.13	mshC	similar to AA sequence:UniProtKB:A0QZY0		1	0	0	0	0	0	0
1397	PFR_JS15-1_1361	Aldo/keto reductase family oxidoreductase	1565996	1566985	+	PROKKA_01392	General stress protein 69	1565996	1566985	+	1.1.1.-	yhdN	similar to AA sequence:UniProtKB:P80874		1	0	0	0	0	0	0
1398	PFR_JS15-1_1362	Hypothetical protein	1567003	1567254	-	PROKKA_01393	hypothetical protein	1567003	1567254	-					1	0	0	0	0	0	0
1399						PROKKA_01394	tRNA-Leu(gag)	1567469	1567557	+			COORDINATES:profile:Aragorn:1.2		0					0	0
1400	PFR_JS15-1_1363	Hypothetical protein	1568159	1568479	+	PROKKA_01395	hypothetical protein	1568159	1568479	+					0	0	0	0	0	0	0
1401	PFR_JS15-1_1364	Hypothetical protein	1568526	1569023	+	PROKKA_01396	hypothetical protein	1568526	1569023	+					0	0	0	0	0	0	0
1402	PFR_JS15-1_1365	Undecaprenyl-diphosphatase UppP	1569538	1570374	+	PROKKA_01397	Undecaprenyl-diphosphatase	1569538	1570374	+	3.6.1.27	uppP	similar to AA sequence:UniProtKB:P60932		1	0	0	0	0	0	0
1403	PFR_JS15-1_1366	Hypothetical protein	1570445	1570831	-	PROKKA_01398	Dinitrogenase iron-molybdenum cofactor	1570445	1570831	-			protein motif:Pfam:PF02579.11		1	0	0	0	0	0	0
1404	PFR_JS15-1_1367	Tryptophan synthase beta chain 2	1570834	1572156	-	PROKKA_01399	Tryptophan synthase beta chain	1570834	1572156	-	4.2.1.20	trpB_2	similar to AA sequence:UniProtKB:Q81TL8		1	0	0	0	0	0	0
1405	PFR_JS15-1_1368	DNA protecting protein DprA	1572317	1573477	-	PROKKA_01400	hypothetical protein	1572317	1573477	-			protein motif:CLUSTERS:PRK10736		1	0	0	0	0	0	0
1406	PFR_JS15-1_1369	Mg-chelatase subunit D/I family protein, ComM	1573474	1575012	-	PROKKA_01401	Competence protein ComM	1573474	1575012	-		comM	similar to AA sequence:UniProtKB:P45049		1	0	0	0	0	0	0
1407	PFR_JS15-1_1370	UPF0102 protein	1575009	1575371	-	PROKKA_01402	hypothetical protein	1575009	1575371	-			protein motif:CLUSTERS:PRK12497		1	0	0	0	0	0	0
1408	PFR_JS15-1_1371	Protein often found in Actinomycetes clustered	1575525	1575839	-	PROKKA_01403	hypothetical protein	1575525	1575839	-					1	0	0	0	0	0	0
1409	PFR_JS15-1_1372	Ribonuclease HII	1575836	1576471	-	PROKKA_01404	Ribonuclease HII	1575836	1576471	-	3.1.26.4	rnhB	similar to AA sequence:UniProtKB:P10442		1	0	0	0	0	0	0
1410	PFR_JS15-1_1373	Signal peptidase I	1576477	1577301	-	PROKKA_01405	Signal peptidase I	1576477	1577301	-	3.4.21.89	lepB	similar to AA sequence:UniProtKB:Q10789		1	0	0	0	0	0	0
1411	PFR_JS15-1_1374	50S ribosomal protein L19	1577313	1577669	-	PROKKA_01406	50S ribosomal protein L19	1577313	1577669	-		rplS	similar to AA sequence:UniProtKB:P66083		1	0	0	0	0	0	0
1412	PFR_JS15-1_1375	Succinate dehydrogenase/fumarate reductase	1577943	1578707	-	PROKKA_01407	Fumarate reductase iron-sulfur subunit	1577943	1578707	-	1.3.99.1	frdB_2	similar to AA sequence:UniProtKB:P0AC47		1	0	0	0	0	0	0
1413	PFR_JS15-1_1376	Succinate dehydrogenase flavoprotein subunit	1578704	1580725	-	PROKKA_01408	Fumarate reductase flavoprotein subunit	1578704	1580725	-	1.3.5.4	frdA_2	similar to AA sequence:UniProtKB:P00363		1	0	0	0	0	0	0
1414	PFR_JS15-1_1377	Succinate dehydrogenase cytochrome B-558 subunit	1580722	1581483	-	PROKKA_01409	hypothetical protein	1580722	1581483	-					1	0	0	0	0	0	0
1415	PFR_JS15-1_1378	Putative xylan esterase	1581581	1582279	+	PROKKA_01410	Acetylxylan esterase precursor	1581581	1582279	+	3.1.1.72	axeA1_1	similar to AA sequence:UniProtKB:D5EV35		1	0	0	0	0	0	0
1416	PFR_JS15-1_1379	TRNA (guanine-N(1)-)-methyltransferase	1582287	1583012	-	PROKKA_01411	tRNA (guanine-N(1)-)-methyltransferase	1582287	1583012	-	2.1.1.228	trmD	similar to AA sequence:UniProtKB:Q2GIL5		1	0	0	0	0	0	0
1417	PFR_JS15-1_1380	Ribosome maturation factor RimM	1583078	1583629	-	PROKKA_01412	Ribosome maturation factor RimM	1583078	1583629	-		rimM	similar to AA sequence:UniProtKB:A0QV39		1	0	0	0	0	0	0
1418	PFR_JS15-1_1381	UPF0109 protein PPA1442	1583638	1583892	-	PROKKA_01413	hypothetical protein	1583638	1583892	-			protein motif:CLUSTERS:PRK02821		1	0	0	0	0	0	0
1419	PFR_JS15-1_1382	30S ribosomal protein S16	1583895	1584386	-	PROKKA_01414	30S ribosomal protein S16	1583895	1584386	-		rpsP	similar to AA sequence:UniProtKB:A0QV37		1	0	0	0	0	0	0
1420	PFR_JS15-1_1383	Amidohydrolase family protein	1584564	1585622	-	PROKKA_01415	hypothetical protein	1584564	1585622	-					1	0	0	0	0	0	0
1421	PFR_JS15-1_1384	Signal recognition particle protein	1585687	1587258	-	PROKKA_01416	Signal recognition particle protein	1585687	1587258	-		ffh	similar to AA sequence:UniProtKB:P66844		1	0	0	0	0	0	0
1422	PFR_JS15-1_1385	Signal recognition particle receptor FtsY	1587385	1588539	-	PROKKA_01417	Signal recognition particle receptor FtsY	1587385	1588539	-		ftsY	similar to AA sequence:UniProtKB:P51835		1	0	0	0	0	0	0
1423	PFR_JS15-1_1386	Hypothetical protein	1588631	1588828	-	PROKKA_01418	hypothetical protein	1588631	1588828	-					1	0	0	0	0	0	0
1424	PFR_JS15-1_1387	Chromosome partition protein Smc (Precursor)	1588910	1592455	-	PROKKA_01419	Chromosome partition protein Smc	1588910	1592455	-		smc	similar to AA sequence:UniProtKB:P51834		1	0	0	0	0	0	0
1425	PFR_JS15-1_1388	GtrA family protein	1592493	1593107	-	PROKKA_01420	GtrA-like protein	1592493	1593107	-			protein motif:Pfam:PF04138.8		1	0	0	0	0	0	0
1426	PFR_JS15-1_1389	Formamidopyrimidine-DNA glycosylase 2	1593119	1594024	-	PROKKA_01421	Formamidopyrimidine-DNA glycosylase 1	1593119	1594000	-	3.2.2.23	fpg1	similar to AA sequence:UniProtKB:P64150		1	0	0	0	0	0	0
1427	PFR_JS15-1_1390	Ribonuclease III	1594024	1594746	-	PROKKA_01422	Ribonuclease 3	1594024	1594746	-	3.1.26.3	rnc	similar to AA sequence:UniProtKB:Q9ZBQ7		1	0	0	0	0	0	0
1428	PFR_JS15-1_1391	Hypothetical protein	1594733	1594945	-	PROKKA_01423	50S ribosomal protein L32	1594733	1594945	-		rpmF	similar to AA sequence:UniProtKB:P80339		1	0	0	0	0	0	0
1429	PFR_JS15-1_1392	Protein of hypothetical function DUF177	1595096	1595581	-	PROKKA_01424	hypothetical protein	1595096	1595581	-					1	0	0	0	0	0	0
1430	PFR_JS15-1_1393	Pantetheine-phosphate adenylyltransferase	1595744	1596229	-	PROKKA_01425	Phosphopantetheine adenylyltransferase	1595744	1596229	-	2.7.7.3	coaD	similar to AA sequence:UniProtKB:O34797		1	0	0	0	0	0	0
1431	PFR_JS15-1_1394	RNA methyltransferase, RsmD family	1596222	1596821	-	PROKKA_01426	Ribosomal RNA small subunit methyltransferase D	1596222	1596821	-	2.1.1.171	rsmD	similar to AA sequence:UniProtKB:P0ADX9		1	0	0	0	0	0	0
1432	PFR_JS15-1_1395	Pyridoxamine 5'-phosphate oxidase family protein	1596897	1597319	+	PROKKA_01427	Pyridoxamine 5'-phosphate oxidase	1596897	1597319	+			protein motif:Pfam:PF12900.1		1	0	0	0	0	0	0
1433	PFR_JS15-1_1396	Putative ATP-dependent DNA helicase RecG	1597426	1599705	-	PROKKA_01428	ATP-dependent DNA helicase RecG	1597426	1599705	-	3.6.4.12	recG	similar to AA sequence:UniProtKB:P24230		1	0	0	0	0	0	0
1434	PFR_JS15-1_1397	50S ribosomal protein L28 2	1599835	1600020	-	PROKKA_01429	50S ribosomal protein L28	1599835	1600020	-		rpmB	similar to AA sequence:UniProtKB:Q9WY96		1	0	0	0	0	0	0
1435	PFR_JS15-1_1398	Putative hydrolase of the metallo-beta-lactamase	1600155	1601906	-	PROKKA_01430	Putative ribonuclease J	1600155	1601906	-	3.1.-.-		similar to AA sequence:UniProtKB:O33294		1	0	0	0	0	0	0
1436	PFR_JS15-1_1399	GCN5 N-acetyltransferase	1601994	1602482	+	PROKKA_01431	Acetyltransferase (GNAT) family protein	1601994	1602482	+			protein motif:Pfam:PF00583.18		1	0	0	0	0	0	0
1437	PFR_JS15-1_1400	Hypothetical protein	1602495	1603220	-	PROKKA_01432	hypothetical protein	1602495	1603220	-					1	0	0	0	0	0	0
1438	PFR_JS15-1_1401	Dihydrodipicolinate reductase	1603226	1603966	-	PROKKA_01433	4-hydroxy-tetrahydrodipicolinate reductase	1603226	1603966	-	1.17.1.8	dapB	similar to AA sequence:UniProtKB:P72024		1	0	0	0	0	0	0
1439	PFR_JS15-1_1402	Polyribonucleotide nucleotidyltransferase	1604171	1606381	-	PROKKA_01434	Polyribonucleotide nucleotidyltransferase	1604171	1606381	-	2.7.7.8	pnp	similar to AA sequence:UniProtKB:Q53597		1	0	0	0	0	0	0
1440	PFR_JS15-1_1403	30S ribosomal protein S15	1606706	1606969	-	PROKKA_01435	30S ribosomal protein S15	1606706	1606969	-		rpsO	similar to AA sequence:UniProtKB:P05766		1	0	0	0	0	0	0
1441	PFR_JS15-1_1404	Riboflavin biosynthesis protein RibF	1607073	1608050	-	PROKKA_01436	Riboflavin biosynthesis protein RibF	1607073	1608050	-		ribF	similar to AA sequence:UniProtKB:Q59263		1	0	0	0	0	0	0
1442	PFR_JS15-1_1405	Glycerol kinase	1608376	1609902	-	PROKKA_01437	Glycerol kinase	1608376	1609902	-	2.7.1.30	glpK_2	similar to AA sequence:UniProtKB:Q5HGD2		1	0	0	0	0	0	0
1443	PFR_JS15-1_1406	Putative glycerol uptake facilitator	1609960	1610751	-	PROKKA_01438	putative glycerol uptake facilitator protein	1609960	1610751	-		glpF	similar to AA sequence:UniProtKB:P19255		1	0	0	0	0	0	0
1444	PFR_JS15-1_1407	TRNA pseudouridine synthase B	1610996	1611892	-	PROKKA_01439	tRNA pseudouridine synthase B	1610996	1611892	-	5.4.99.25	truB	similar to AA sequence:UniProtKB:P62190		1	0	0	0	0	0	0
1445	PFR_JS15-1_1408	Ribosome-binding factor A	1611889	1612329	-	PROKKA_01440	Ribosome-binding factor A	1611889	1612329	-		rbfA	similar to AA sequence:UniProtKB:P65967		1	0	0	0	0	0	0
1446	PFR_JS15-1_1409	Translation initiation factor IF-2	1612329	1615250	-	PROKKA_01441	Translation initiation factor IF-2	1612329	1615250	-		infB	similar to AA sequence:UniProtKB:P04766		1	0	0	0	0	0	0
1447	PFR_JS15-1_1410	Hypothetical protein	1615446	1615643	-	PROKKA_01442	hypothetical protein	1615446	1615643	-			protein motif:CLUSTERS:PRK09190		0	0	0	0	0	0	0
1448	PFR_JS15-1_1411	Transcription termination factor NusA	1615790	1616848	-	PROKKA_01443	hypothetical protein	1615790	1616848	-			similar to AA sequence:UniProtKB:P0A5M2	Transcription termination/antitermination protein NusA	1	0	0	0	0	0	0
1449	PFR_JS15-1_1412	Ribosome maturation factor RimP	1616850	1617323	-	PROKKA_01444	Ribosome maturation factor RimP	1616850	1617323	-		rimP	similar to AA sequence:UniProtKB:P67220		1	0	0	0	0	0	0
1450	PFR_JS15-1_1413	Hypothetical protein	1617593	1618579	+	PROKKA_01445	hypothetical protein	1617593	1618579	+					1	0	0	0	0	0	0
1451	PFR_JS15-1_1414	Prolyl-tRNA synthetase ProS	1618638	1620458	-	PROKKA_01446	Proline--tRNA ligase	1618638	1620458	-	6.1.1.15	proS	similar to AA sequence:UniProtKB:A0QVM0		1	0	0	0	0	0	0
1452	PFR_JS15-1_1415	Acetyltransferase, GNAT family	1620543	1621385	-	PROKKA_01447	Mycothiol acetyltransferase	1620543	1621385	-	2.3.1.189	mshD_1	protein motif:HAMAP:MF_01698		1	0	0	0	0	0	0
1453	PFR_JS15-1_1416	4-hydroxy-3-methylbut-2-en-1-yl diphosphate	1621525	1622691	-	PROKKA_01448	4-hydroxy-3-methylbut-2-en-1-yl diphosphate synthase	1621525	1622691	-	1.17.7.1	ispG	similar to AA sequence:UniProtKB:Q81LV7		1	0	0	0	0	0	0
1454	PFR_JS15-1_1417	1-deoxy-D-xylulose 5-phosphate reductoisomerase	1622764	1623882	-	PROKKA_01449	1-deoxy-D-xylulose 5-phosphate reductoisomerase	1622764	1623882	-	1.1.1.267	dxr	similar to AA sequence:UniProtKB:P64012		1	0	0	0	0	0	0
1455	PFR_JS15-1_1418	Ribosomal RNA large subunit methyltransferase N	1624028	1625164	-	PROKKA_01450	putative dual-specificity RNA methyltransferase RlmN	1624028	1625164	-	2.1.1.-	rlmN	similar to AA sequence:UniProtKB:Q7A600		1	0	0	0	0	0	0
1456	PFR_JS15-1_1419	Phosphatidate cytidylyltransferase	1625161	1626006	-	PROKKA_01451	Phosphatidate cytidylyltransferase	1625161	1626006	-	2.7.7.41	cdsA	similar to AA sequence:UniProtKB:P0ABG1		1	0	0	0	0	0	0
1457	PFR_JS15-1_1420	Ribosome recycling factor	1626015	1626572	-	PROKKA_01452	Ribosome-recycling factor	1626015	1626572	-		frr	similar to AA sequence:UniProtKB:Q8NP03		1	0	0	0	0	0	0
1458	PFR_JS15-1_1421	UMP kinase	1626645	1627358	-	PROKKA_01453	Uridylate kinase	1626645	1627358	-	2.7.4.22	pyrH	similar to AA sequence:UniProtKB:A0QVD9		1	0	0	0	0	0	0
1459	PFR_JS15-1_1422	Translation elongation factor Ts	1627531	1628343	-	PROKKA_01454	Elongation factor Ts	1627531	1628343	-		tsf	similar to AA sequence:UniProtKB:A0QVB9		1	0	0	0	0	0	0
1460	PFR_JS15-1_1423	30S ribosomal protein S2	1628382	1629359	-	PROKKA_01455	30S ribosomal protein S2	1628382	1629359	-		rpsB	similar to AA sequence:UniProtKB:P66544		1	0	0	0	0	0	0
1461	PFR_JS15-1_1424	Peptidase, M23 family	1629653	1630837	+	PROKKA_01456	Murein DD-endopeptidase MepM	1629653	1630837	+	3.4.24.-	mepM_2	similar to AA sequence:UniProtKB:P0AFS9		1	0	0	0	0	0	0
1462	PFR_JS15-1_1425	Tyrosine recombinase XerC 1	1630881	1631807	-	PROKKA_01457	Tyrosine recombinase XerC	1630881	1631807	-		xerC_1	similar to AA sequence:UniProtKB:O31207		1	0	0	0	0	0	0
1463	PFR_JS15-1_1426	Peptide deformylase	1631956	1632576	+	PROKKA_01458	Peptide deformylase	1631956	1632576	+	3.5.1.88	def	similar to AA sequence:UniProtKB:Q9I7A8		1	0	0	0	0	0	0
1464	PFR_JS15-1_1427	RNA methyltransferase, TrmH family	1632610	1633419	-	PROKKA_01459	Putative TrmH family tRNA/rRNA methyltransferase	1632610	1633419	-	2.1.1.-		similar to AA sequence:UniProtKB:Q7A794		1	0	0	0	0	0	0
1465	PFR_JS15-1_1428	Sodium Bile acid symporter family protein	1633560	1634603	+	PROKKA_01460	Sodium Bile acid symporter family protein	1633560	1634603	+			protein motif:Pfam:PF01758.10		1	0	0	0	0	0	0
1466	PFR_JS15-1_1429	ABC-type molybdenum transport system, ATPase	1634685	1635479	-	PROKKA_01461	putative ABC transporter ATP-binding protein YlmA	1634685	1635479	-	3.6.3.-	ylmA	similar to AA sequence:UniProtKB:O31723		1	0	0	0	0	0	0
1467	PFR_JS15-1_1430	Hypothetical protein	1635632	1636381	+	PROKKA_01462	hypothetical protein	1635632	1636381	+					1	0	0	0	0	0	0
1468	PFR_JS15-1_1431	Enoyl-(Acyl carrier protein) reductase	1636456	1637229	-	PROKKA_01463	Enoyl-[acyl-carrier-protein] reductase [NADH]	1636456	1637229	-	1.3.1.9	inhA	similar to AA sequence:UniProtKB:P0A5Y6		1	0	0	0	0	0	0
1469	PFR_JS15-1_1432	3-oxoacyl-[acyl-carrier protein] reductase fabG1	1637319	1638014	-	PROKKA_01464	3-oxoacyl-[acyl-carrier-protein] reductase FabG1	1637319	1638014	-	1.1.1.100	fabG1	similar to AA sequence:UniProtKB:P0A5Y4		1	0	0	0	0	0	0
1470	PFR_JS15-1_1433	Short-chain dehydrogenase/reductase SDR	1638123	1638869	+	PROKKA_01465	Rhamnolipids biosynthesis 3-oxoacyl-[acyl-carrier-protein] reductase	1638123	1638869	+	1.1.1.100	rhlG	similar to AA sequence:UniProtKB:Q9RPT1		1	0	0	0	0	0	0
1471	PFR_JS15-1_1434	Mycinamicin-resistance protein MyrA	1638877	1639710	+	PROKKA_01466	23S rRNA (guanine(748)-N(1))-methyltransferase	1638877	1639710	+	2.1.1.188	rlmAII	similar to AA sequence:UniProtKB:Q9S1M6		1	0	0	0	0	0	0
1472	PFR_JS15-1_1435	ABC transporter related protein	1639861	1641459	-	PROKKA_01467	putative ABC transporter ATP-binding protein YheS	1639861	1641459	-		yheS_2	similar to AA sequence:UniProtKB:P63389		1	0	0	0	0	0	0
1473	PFR_JS15-1_1436	Metal-sulfur cluster biosynthetic protein	1641733	1642182	-	PROKKA_01468	hypothetical protein	1641733	1642182	-					1	0	0	0	0	0	0
1474	PFR_JS15-1_1437	SUF system FeS assembly protein, NifU family	1642179	1642631	-	PROKKA_01469	NifU-like protein	1642179	1642631	-		nifU	similar to AA sequence:UniProtKB:O32163		1	0	0	0	0	0	0
1475	PFR_JS15-1_1438	Cysteine desulfurase, SufS family protein	1642628	1643884	-	PROKKA_01470	putative cysteine desulfurase	1642628	1643884	-	2.8.1.7	csd	similar to AA sequence:UniProtKB:O32164		1	0	0	0	0	0	0
1476	PFR_JS15-1_1439	FeS assembly ATPase SufC	1643874	1644623	-	PROKKA_01471	Vegetative protein 296	1643874	1644623	-		yurY	similar to AA sequence:UniProtKB:P80866		1	0	0	0	0	0	0
1477	PFR_JS15-1_1440	Putative ferredoxin subunit of phenylpropionate	1644628	1644975	-	PROKKA_01472	Benzene 1,2-dioxygenase system ferredoxin subunit	1644628	1644975	-		bnzC	similar to AA sequence:UniProtKB:P08086		1	0	0	0	0	0	0
1478	PFR_JS15-1_1441	FeS assembly protein SufD	1644972	1646189	-	PROKKA_01473	FeS cluster assembly protein SufD	1644972	1646189	-		sufD	similar to AA sequence:UniProtKB:P77689		1	0	0	0	0	0	0
1479	PFR_JS15-1_1442	FeS assembly protein SufB	1646189	1647646	-	PROKKA_01474	FeS cluster assembly protein SufB	1646189	1647646	-		sufB	similar to AA sequence:UniProtKB:P77522		1	0	0	0	0	0	0
1480	PFR_JS15-1_1443	Transcriptional regulator, ArsR family	1647643	1648407	-	PROKKA_01475	hypothetical protein	1647643	1648407	-					1	0	0	0	0	0	0
1481	PFR_JS15-1_1444	Transcriptional regulator, GntR family	1648676	1649050	+	PROKKA_01476	HTH-type transcriptional repressor YtrA	1648676	1649050	+		ytrA_1	similar to AA sequence:UniProtKB:O34712		1	0	0	0	0	0	0
1482	PFR_JS15-1_1445	ABC-type multidrug transport system, ATPase	1649047	1649745	+	PROKKA_01477	ABC-type transporter ATP-binding protein EcsA	1649047	1649745	+		ecsA	similar to AA sequence:UniProtKB:P55339		1	0	0	0	0	0	0
1483	PFR_JS15-1_1446	Conserved domain protein	1649742	1650557	+	PROKKA_01478	hypothetical protein	1649742	1650557	+					1	0	0	0	0	0	0
1484	PFR_JS15-1_1447	Glutamine amidotransferase subunit PdxT	1650709	1651329	-	PROKKA_01479	Glutamine amidotransferase subunit PdxT	1650709	1651329	-	2.6.-.-	pdxT	similar to AA sequence:UniProtKB:A0QWH0		1	0	0	0	0	0	0
1485	PFR_JS15-1_1448	Pyridoxal biosynthesis lyase PdxS	1651334	1652224	-	PROKKA_01480	Pyridoxal biosynthesis lyase PdxS	1651334	1652224	-	4.-.-.-	pdxS	similar to AA sequence:UniProtKB:P82134		1	0	0	0	0	0	0
1486	PFR_JS15-1_1449	HTH-type pyridoxine biosynthesis transcriptional	1652320	1653750	+	PROKKA_01481	HTH-type transcriptional regulatory protein GabR	1652320	1653750	+		gabR	similar to AA sequence:UniProtKB:P94426		1	0	0	0	0	0	0
1487	PFR_JS15-1_1450	Glucose-6-phosphate 1-dehydrogenase Zwf	1653903	1655522	+	PROKKA_01482	Glucose-6-phosphate 1-dehydrogenase	1653903	1655522	+	1.1.1.49	zwf	similar to AA sequence:UniProtKB:P0AC53		1	0	0	0	0	0	0
1488	PFR_JS15-1_1451	Putative OpcA protein	1655533	1656435	+	PROKKA_01483	Glucose-6-phosphate dehydrogenase subunit	1655533	1656435	+			protein motif:Pfam:PF10128.3		1	0	0	0	0	0	0
1489	PFR_JS15-1_1452	6-phosphogluconolactonase devB	1656432	1657190	+	PROKKA_01484	6-phosphogluconolactonase	1656432	1657190	+	3.1.1.31	pgl_2	similar to AA sequence:UniProtKB:P63338		1	0	0	0	0	0	0
1490	PFR_JS15-1_1453	Electron transport protein	1657507	1657863	-	PROKKA_01485	RNA polymerase-binding protein RbpA	1657507	1657863	-		rbpA_2	similar to AA sequence:UniProtKB:Q9RKY0		1	0	0	0	0	0	0
1491	PFR_JS15-1_1454	Hypothetical protein	1657936	1658196	-	PROKKA_01486	preprotein translocase subunit SecG	1657936	1658196	-			protein motif:CLUSTERS:PRK06870		1	0	0	0	0	0	0
1492	PFR_JS15-1_1455	Triosephosphate isomerase 1	1658319	1659107	-	PROKKA_01487	Triosephosphate isomerase	1658319	1659107	-	5.3.1.1	tpiA_1	similar to AA sequence:UniProtKB:P66940		1	0	0	0	0	0	0
1493	PFR_JS15-1_1456	Phosphoglycerate kinase	1659110	1660321	-	PROKKA_01488	Phosphoglycerate kinase	1659110	1660321	-	2.7.2.3	pgk	similar to AA sequence:UniProtKB:Q01655		1	0	0	0	0	0	0
1494	PFR_JS15-1_1457	Glyceraldehyde 3-phosphate dehydrogenase gap	1660485	1661489	-	PROKKA_01489	Glyceraldehyde-3-phosphate dehydrogenase	1660485	1661489	-	1.2.1.12	gap	similar to AA sequence:UniProtKB:Q01651		1	0	0	0	0	0	0
1495	PFR_JS15-1_1458	Hypothetical protein	1661603	1662196	-	PROKKA_01490	hypothetical protein	1661603	1662196	-					0	0	0	0	0	0	0
1496	PFR_JS15-1_1459	Hypothetical protein	1662142	1662981	-	PROKKA_01491	hypothetical protein	1662142	1662981	-					0	0	0	0	0	0	0
1497	PFR_JS15-1_1460	Hypothetical protein	1662978	1663241	-	PROKKA_01492	Macrolide export ATP-binding/permease protein MacB	1662978	1663241	-	3.6.3.-	macB_2	similar to AA sequence:UniProtKB:Q5MK06		0	0	0	0	0	0	0
1498	PFR_JS15-1_1461	AtpA	1663192	1663701	-	PROKKA_01493	Bacitracin export ATP-binding protein BceA	1663192	1663701	-		bceA	similar to AA sequence:UniProtKB:O34697		0	0	0	0	0	0	0
1499	PFR_JS15-1_1462	Putative sporulation transcription regulator	1663767	1664750	-	PROKKA_01494	Putative sporulation transcription regulator WhiA	1663767	1664750	-		whiA	similar to AA sequence:UniProtKB:A0QWV9		1	0	0	0	0	0	0
1500	PFR_JS15-1_1463	UPF0052 protein ML0564	1664794	1665762	-	PROKKA_01495	Putative gluconeogenesis factor	1664794	1665762	-			similar to AA sequence:UniProtKB:P71691		1	0	0	0	0	0	0
1501	PFR_JS15-1_1464	P-loop ATP-binding domain protein, PF03668	1665759	1666643	-	PROKKA_01496	glmZ(sRNA)-inactivating NTPase	1665759	1666643	-			protein motif:CLUSTERS:PRK05416		1	0	0	0	0	0	0
1502	PFR_JS15-1_1465	UvrABC system protein C	1666812	1668806	-	PROKKA_01497	UvrABC system protein C	1666812	1668806	-		uvrC	similar to AA sequence:UniProtKB:P0A8G0		1	0	0	0	0	0	0
1503	PFR_JS15-1_1466	Histidine kinase	1668851	1670293	+	PROKKA_01498	Sensor histidine kinase DesK	1668851	1670293	+	2.7.13.3	desK_3	similar to AA sequence:UniProtKB:O34757		1	0	0	0	0	0	0
1504	PFR_JS15-1_1467	Two-component system response regulator	1670268	1670921	+	PROKKA_01499	Response regulator protein VraR	1670268	1670921	+		vraR	similar to AA sequence:UniProtKB:Q7A4R9		1	0	0	0	0	0	0
1505	PFR_JS15-1_1468	YhaQ	1671024	1671905	+	PROKKA_01500	putative ABC transporter ATP-binding protein YxlF	1671024	1671905	+	3.6.3.-	yxlF_2	similar to AA sequence:UniProtKB:P94374		0	0	0	0	0	0	0
1506	PFR_JS15-1_1469	ABC-type Na efflux pump permease component	1671902	1673068	+	PROKKA_01501	ABC-2 family transporter protein	1671902	1673068	+			protein motif:Pfam:PF12698.1		1	0	0	0	0	0	0
1507	PFR_JS15-1_1470	GNAT family acetyltransferase	1673210	1673746	+	PROKKA_01502	hypothetical protein	1673210	1673746	+					1	0	0	0	0	0	0
1508	PFR_JS15-1_1471	UvrABC system protein A	1673761	1676826	-	PROKKA_01503	UvrABC system protein A	1673761	1676826	-		uvrA_3	similar to AA sequence:UniProtKB:P63380		1	0	0	0	0	0	0
1509	PFR_JS15-1_1472	TIGR03083 family protein	1677038	1677784	+	PROKKA_01504	mycothiol-dependent maleylpyruvate isomerase	1677038	1677784	+			protein motif:CLUSTERS:PRK09583		1	0	0	0	0	0	0
1510	PFR_JS15-1_1473	Zn-dependent hydrolases	1677786	1678379	+	PROKKA_01505	hydroxyacylglutathione hydrolase	1677786	1678379	+			protein motif:CLUSTERS:PRK10241		1	0	0	0	0	0	0
1511	PFR_JS15-1_1474	Integral membrane protein, TerC family	1678414	1679448	-	PROKKA_01506	Inner membrane protein alx	1678414	1679448	-		alx_2	similar to AA sequence:UniProtKB:P42601		1	0	0	0	0	0	0
1512	PFR_JS15-1_1475	UvrABC system protein B	1679639	1681723	-	PROKKA_01507	UvrABC system protein B	1679639	1681723	-		uvrB	similar to AA sequence:UniProtKB:P56981		1	0	0	0	0	0	0
1513	PFR_JS15-1_1476	Dephospho-CoA kinase	1681798	1682466	-	PROKKA_01508	Dephospho-CoA kinase	1681798	1682466	-	2.7.1.24	coaE	similar to AA sequence:UniProtKB:O67792		1	0	0	0	0	0	0
1514	PFR_JS15-1_1477	Phosphorylase family protein	1682470	1683246	-	PROKKA_01509	Purine nucleoside phosphorylase DeoD-type	1682470	1683246	-	2.4.2.1	deoD	similar to AA sequence:UniProtKB:Q5EEL8		1	0	0	0	0	0	0
1515	PFR_JS15-1_1478	30S ribosomal protein S1	1683363	1684817	-	PROKKA_01510	30S ribosomal protein S1	1683363	1684817	-		rpsA	similar to AA sequence:UniProtKB:P0AG67		1	0	0	0	0	0	0
1516	PFR_JS15-1_1479	Succinate-semialdehyde dehydrogenase [NADP( )]	1685180	1686646	-	PROKKA_01511	Succinate-semialdehyde dehydrogenase [NADP(+)] GabD	1685180	1686646	-	1.2.1.79	gabD	similar to AA sequence:UniProtKB:P25526		1	0	0	0	0	0	0
1517	PFR_JS15-1_1480	Sortase family protein	1686866	1687579	+	PROKKA_01512	hypothetical protein	1686866	1687579	+					1	0	0	0	0	0	0
1518	PFR_JS15-1_1481	DNA-directed DNA polymerase	1687599	1690277	-	PROKKA_01513	DNA polymerase I	1687599	1690277	-	2.7.7.7	polA	similar to AA sequence:UniProtKB:P52026		1	0	0	0	0	0	0
1519	PFR_JS15-1_1482	Response regulator	1690384	1691007	-	PROKKA_01514	putative transcriptional regulatory protein pdtaR	1690384	1691007	-		pdtaR	similar to AA sequence:UniProtKB:O06143		1	0	0	0	0	0	0
1520						PROKKA_01515	tRNA-Leu(caa)	1691227	1691311	+			COORDINATES:profile:Aragorn:1.2		0					0	0
1521	PFR_JS15-1_1483	Pyruvate kinase	1691543	1692976	-	PROKKA_01516	Pyruvate kinase	1691543	1692976	-	2.7.1.40	pyk	similar to AA sequence:UniProtKB:Q46078		1	0	0	0	0	0	0
1522	PFR_JS15-1_1484	Pseudouridylate synthase	1693292	1694212	-	PROKKA_01517	Ribosomal large subunit pseudouridine synthase D	1693292	1694212	-	5.4.99.23	rluD	similar to AA sequence:UniProtKB:P33643		1	0	0	0	0	0	0
1523	PFR_JS15-1_1485	Signal peptidase II	1694209	1694754	-	PROKKA_01518	lipoprotein signal peptidase	1694209	1694754	-			protein motif:CLUSTERS:PRK00376		1	0	0	0	0	0	0
1524	PFR_JS15-1_1486	C4-type zinc finger protein, DksA/TraR family	1694811	1695239	-	PROKKA_01519	RNA polymerase-binding transcription factor DksA	1694811	1695239	-		dksA	similar to AA sequence:UniProtKB:P0ABS1		1	0	0	0	0	0	0
1525	PFR_JS15-1_1487	DivIVA domain protein	1695314	1696312	-	PROKKA_01520	Cell wall synthesis protein Wag31	1695314	1696312	-			similar to AA sequence:UniProtKB:P0A5N2		1	0	0	0	0	0	0
1526	PFR_JS15-1_1488	Hypothetical protein	1696449	1696742	-	PROKKA_01521	YGGT family protein	1696449	1696742	-			protein motif:Pfam:PF02325.11		1	0	0	0	0	0	0
1527	PFR_JS15-1_1489	Cell division protein sepF	1696746	1697267	-	PROKKA_01522	Cell division protein SepF	1696746	1697267	-		sepF	similar to AA sequence:UniProtKB:O31728		1	0	0	0	0	0	0
1528	PFR_JS15-1_1490	YfiH family protein	1697419	1698207	-	PROKKA_01523	Laccase domain protein YfiH	1697419	1698207	-		yfiH	similar to AA sequence:UniProtKB:P33644		1	0	0	0	0	0	0
1529	PFR_JS15-1_1491	Cell division protein FtsZ	1698217	1699458	-	PROKKA_01524	Cell division protein FtsZ	1698217	1699458	-		ftsZ	similar to AA sequence:UniProtKB:P94337		1	0	0	0	0	0	0
1530	PFR_JS15-1_1492	POTRA domain protein, FtsQ-type	1699676	1700407	-	PROKKA_01525	Cell division protein FtsQ	1699676	1700407	-		ftsQ	similar to AA sequence:UniProtKB:P64168		1	0	0	0	0	0	0
1531	PFR_JS15-1_1493	UDP-N-acetylmuramate--L-alanine ligase MurC	1700404	1701846	-	PROKKA_01526	UDP-N-acetylmuramate--L-alanine ligase	1700404	1701846	-	6.3.2.8	murC	similar to AA sequence:UniProtKB:P45066		1	0	0	0	0	0	0
1532	PFR_JS15-1_1494	UDP-N-acetylglucosamine--N-acetylmuramyl-(Pentape	1701843	1702943	-	PROKKA_01527	UDP-N-acetylglucosamine--N-acetylmuramyl-(pentapeptide) pyrophosphoryl-undecaprenol N-acetylglucosamine transferase	1701843	1702943	-	2.4.1.227	murG	similar to AA sequence:UniProtKB:P17443		1	0	0	0	0	0	0
1533	PFR_JS15-1_1495	Cell division protein FtsW	1702943	1704208	-	PROKKA_01528	Lipid II flippase FtsW	1702943	1704208	-		ftsW_1	similar to AA sequence:UniProtKB:P63762		1	0	0	0	0	0	0
1534	PFR_JS15-1_1496	UDP-N-acetylmuramoylalanine--D-glutamate ligase	1704401	1705822	-	PROKKA_01529	UDP-N-acetylmuramoylalanine--D-glutamate ligase	1704401	1705822	-	6.3.2.9	murD	similar to AA sequence:UniProtKB:A5U4I2		1	0	0	0	0	0	0
1535	PFR_JS15-1_1497	Phospho-N-acetylmuramoyl-pentappeptidetransferase	1705882	1706958	-	PROKKA_01530	Phospho-N-acetylmuramoyl-pentapeptide-transferase	1705882	1706958	-	2.7.8.13	mraY	similar to AA sequence:UniProtKB:P0A6W3		1	0	0	0	0	0	0
1536	PFR_JS15-1_1498	UDP-N-acetylmuramoyl-tripeptide--D-alanyl-D-alani	1706955	1708439	-	PROKKA_01531	UDP-N-acetylmuramoyl-tripeptide--D-alanyl-D-alanine ligase	1706955	1708439	-	6.3.2.10	murF	similar to AA sequence:UniProtKB:P11880		1	0	0	0	0	0	0
1537	PFR_JS15-1_1499	UDP-N-acetylmuramoyl-L-alanyl-D-glutamate--2,6-di	1708441	1710030	-	PROKKA_01532	UDP-N-acetylmuramoyl-L-alanyl-D-glutamate--2,6-diaminopimelate ligase	1708441	1710030	-	6.3.2.13	murE	similar to AA sequence:UniProtKB:P65477		1	0	0	0	0	0	0
1538	PFR_JS15-1_1500	Penicillin binding protein transpeptidase domain	1710030	1712093	-	PROKKA_01533	Penicillin-binding protein PbpB	1710030	1712093	-	2.4.1.129	pbpB	similar to AA sequence:UniProtKB:A0R022		1	0	0	0	0	0	0
1539	PFR_JS15-1_1501	Hypothetical protein	1712090	1712608	-	PROKKA_01534	Cell division protein FtsL	1712090	1712608	-		ftsL	protein motif:HAMAP:MF_00910		1	0	0	0	0	0	0
1540	PFR_JS15-1_1502	Ribosomal RNA small subunit methyltransferase H	1712605	1713633	-	PROKKA_01535	Ribosomal RNA small subunit methyltransferase H	1712605	1713633	-	2.1.1.199	rsmH	similar to AA sequence:UniProtKB:P60392		1	0	0	0	0	0	0
1541	PFR_JS15-1_1503	Protein MraZ	1713812	1714249	-	PROKKA_01536	cell division protein MraZ	1713812	1714249	-			protein motif:CLUSTERS:PRK00326		1	0	0	0	0	0	0
1542	PFR_JS15-1_1504	Hypothetical protein	1714472	1714855	-	PROKKA_01537	hypothetical protein	1714472	1714855	-					1	0	0	0	0	0	0
1543	PFR_JS15-1_1505	DNA polymerase IV	1714895	1716136	-	PROKKA_01538	DNA polymerase IV	1714895	1716136	-	2.7.7.7	dinB_2	similar to AA sequence:UniProtKB:Q47155		1	0	0	0	0	0	0
1544	PFR_JS15-1_1506	DNA polymerase III, alpha subunit	1716163	1719783	-	PROKKA_01539	DNA polymerase III subunit alpha	1716163	1719783	-	2.7.7.7	dnaE_2	similar to AA sequence:UniProtKB:P10443		1	0	0	0	0	0	0
1545	PFR_JS15-1_1507	Hypothetical protein	1719795	1720196	-	PROKKA_01540	hypothetical protein	1719795	1720196	-					1	0	0	0	0	0	0
1546	PFR_JS15-1_1508	DNA or RNA helicase, Superfamily I family	1720410	1722620	+	PROKKA_01541	Helicase IV	1720410	1722620	+	3.6.4.12	helD	similar to AA sequence:UniProtKB:O32215		1	0	0	0	0	0	0
1547	PFR_JS15-1_1509	Methylenetetrahydrofolate reductase (NAD(P)H)	1722574	1723515	-	PROKKA_01542	5,10-methylenetetrahydrofolate reductase	1722574	1723515	-	1.5.1.20	metF	similar to AA sequence:UniProtKB:P0AEZ1		1	0	0	0	0	0	0
1548	PFR_JS15-1_1510	Polyprenyl synthetase	1723561	1724631	+	PROKKA_01543	(2E,6E)-farnesyl diphosphate synthase	1723561	1724631	+	2.5.1.10		similar to AA sequence:UniProtKB:P0A5H8		1	0	0	0	0	0	0
1549	PFR_JS15-1_1511	Hypothetical protein	1724755	1727025	+	PROKKA_01544	Serine/threonine-protein kinase PK-1	1724755	1727025	+	2.7.11.1	spk1	similar to AA sequence:UniProtKB:Q9KIG4		1	0	0	0	0	0	0
1550	PFR_JS15-1_1512	Membrane spanning protein DUF6	1727068	1727991	+	PROKKA_01545	EamA-like transporter family protein	1727068	1727991	+			protein motif:Pfam:PF00892.14		1	0	0	0	0	0	0
1551	PFR_JS15-1_1513	Zn-dependent hydrolase of the beta-lactamase	1728004	1728747	-	PROKKA_01546	metal-dependent hydrolase	1728004	1728747	-			protein motif:CLUSTERS:PRK00685		1	0	0	0	0	0	0
1552	PFR_JS15-1_1514	3-deoxy-7-phosphoheptulonate synthase	1728778	1730124	-	PROKKA_01547	Phospho-2-dehydro-3-deoxyheptonate aldolase	1728778	1730124	-	2.5.1.54	aroH	similar to AA sequence:UniProtKB:P80574		1	0	0	0	0	0	0
1553	PFR_JS15-1_1515	1-acyl-sn-glycerol-3-phosphate acyltransferase	1730275	1731216	-	PROKKA_01548	Acyltransferase	1730275	1731216	-			protein motif:Pfam:PF01553.15		1	0	0	0	0	0	0
1554	PFR_JS15-1_1516	Acyltransferase PlsC	1731209	1732054	-	PROKKA_01549	2-acyl-glycerophospho-ethanolamine acyltransferase	1731209	1732054	-			protein motif:CLUSTERS:PRK08633		1	0	0	0	0	0	0
1555	PFR_JS15-1_1517	Peptidase M23B family / metalloendopeptidase	1732171	1733292	-	PROKKA_01550	Murein DD-endopeptidase MepM	1732171	1733292	-	3.4.24.-	mepM_3	similar to AA sequence:UniProtKB:P0AFS9		1	0	0	0	0	0	0
1556	PFR_JS15-1_1518	Transcriptional regulator, AsnC family	1733552	1733821	+	PROKKA_01551	AsnC family protein	1733552	1733821	+			protein motif:Pfam:PF01037.15		1	0	0	0	0	0	0
1557	PFR_JS15-1_1519	Peptidylprolyl isomerase	1733952	1734464	-	PROKKA_01552	Peptidyl-prolyl cis-trans isomerase B	1733952	1734464	-	5.2.1.8	cypB	similar to AA sequence:UniProtKB:P77949		1	0	0	0	0	0	0
1558	PFR_JS15-1_1520	Hypothetical protein	1734791	1735807	+	PROKKA_01553	hypothetical protein	1734791	1735807	+					1	0	0	0	0	0	0
1559	PFR_JS15-1_1521	Acetyltransferase, GNAT family	1735996	1737093	+	PROKKA_01554	Phosphoribosyl-ATP pyrophosphohydrolase	1735996	1737093	+			protein motif:Pfam:PF01503.11		1	0	0	0	0	0	0
1560	PFR_JS15-1_1522	Hypothetical protein	1737185	1737853	+	PROKKA_01555	hypothetical protein	1737185	1737853	+					1	0	0	0	0	0	0
1561	PFR_JS15-1_1523	Hypothetical protein	1737879	1738562	+	PROKKA_01556	hypothetical protein	1737879	1738562	+					1	0	0	0	0	0	0
1562	PFR_JS15-1_1524	Hypothetical protein	1738702	1739127	+	PROKKA_01557	hypothetical protein	1738702	1739127	+					1	0	0	0	0	0	0
1563	PFR_JS15-1_1525	Anthranilate phosphoribosyltransferase	1739168	1740217	-	PROKKA_01558	Anthranilate phosphoribosyltransferase	1739168	1740217	-	2.4.2.18	trpD	similar to AA sequence:UniProtKB:A0R048		1	0	0	0	0	0	0
1564	PFR_JS15-1_1526	Response regulator	1740217	1740741	-	PROKKA_01559	putative response regulatory protein/MT3230	1740217	1740741	-			similar to AA sequence:UniProtKB:P95183		1	0	0	0	0	0	0
1565	PFR_JS15-1_1527	IMP dehydrogenase family protein	1740954	1742417	+	PROKKA_01560	Inosine-5'-monophosphate dehydrogenase	1740954	1742417	+	1.1.1.205	guaB_2	similar to AA sequence:UniProtKB:P99106		1	0	0	0	0	0	0
1566	PFR_JS15-1_1528	Iron-sulfur cluster assembly accessory protein	1742556	1742906	-	PROKKA_01561	Iron-sulfur cluster insertion protein ErpA	1742556	1742906	-		erpA	similar to AA sequence:UniProtKB:P45344		1	0	0	0	0	0	0
1567	PFR_JS15-1_1529	Hypothetical protein	1743064	1743939	-	PROKKA_01562	glycerate kinase I	1743064	1743939	-			protein motif:CLUSTERS:PRK10342		1	0	0	0	0	0	0
1568	PFR_JS15-1_1530	Hypothetical protein	1744000	1744290	-	PROKKA_01563	hypothetical protein	1744000	1744290	-					1	0	0	0	0	0	0
1569	PFR_JS15-1_1531	Phage shock protein A, PspA	1744287	1745081	-	PROKKA_01564	hypothetical protein	1744287	1745081	-			similar to AA sequence:UniProtKB:P54617	Phage shock protein A homolog	1	0	0	0	0	0	0
1570	PFR_JS15-1_1532	Integral membrane protein	1745381	1745935	+	PROKKA_01565	hypothetical protein	1745381	1745935	+					1	0	0	0	0	0	0
1571	PFR_JS15-1_1533	Hypothetical protein	1745935	1746150	+	PROKKA_01566	hypothetical protein	1745935	1746150	+					1	0	0	0	0	0	0
1572	PFR_JS15-1_1534	Aminomethyltransferase	1746305	1747426	-	PROKKA_01567	Aminomethyltransferase	1746305	1747426	-	2.1.2.10	gcvT	similar to AA sequence:UniProtKB:P54378		1	0	0	0	0	0	0
1573	PFR_JS15-1_1535	Hypothetical protein	1747727	1749496	+	PROKKA_01568	Dihydrolipoyllysine-residue acetyltransferase component of pyruvate dehydrogenase complex	1747727	1749496	+	2.3.1.12	aceF	similar to AA sequence:UniProtKB:Q8NNJ2		1	0	0	0	0	0	0
1574	PFR_JS15-1_1536	Integral membrane protein	1749780	1750550	+	PROKKA_01569	hypothetical protein	1749780	1750550	+					1	0	0	0	0	0	0
1575	PFR_JS15-1_1537	Oleandomycin resistance ATPase	1750583	1752394	+	PROKKA_01570	putative ABC transporter ATP-binding protein	1750583	1752394	+			similar to AA sequence:UniProtKB:P45127		1	0	0	0	0	0	0
1576	PFR_JS15-1_1538	Glutamate--ammonia ligase	1752570	1754009	+	PROKKA_01571	Glutamine synthetase	1752570	1754009	+	6.3.1.2	glnA_1	similar to AA sequence:UniProtKB:P15106		1	0	0	0	0	0	0
1577	PFR_JS15-1_1539	Hypothetical protein	1754254	1754844	+	PROKKA_01572	hypothetical protein	1754254	1754844	+					1	0	0	0	0	0	0
1578	PFR_JS15-1_1540	Transcriptional regulator	1754935	1755519	+	PROKKA_01573	Tetracycline repressor protein class A from transposon 1721	1754935	1755519	+		tetR	similar to AA sequence:UniProtKB:P03038	Putative antibiotic resistance	1	0	0	0	0	0	0
1579	PFR_JS15-1_1541	Putative oxidoreductase in MprA 5'region	1755539	1756354	-	PROKKA_01574	short chain dehydrogenase	1755539	1756354	-			protein motif:CLUSTERS:PRK07904		1	0	0	0	0	0	0
1580	PFR_JS15-1_1542	Glutamate-ammonia-ligase adenylyltransferase	1756351	1759317	-	PROKKA_01575	Glutamate-ammonia-ligase adenylyltransferase	1756351	1759317	-	2.7.7.42	glnE	similar to AA sequence:UniProtKB:P30870		1	0	0	0	0	0	0
1581	PFR_JS15-1_1543	Hypothetical protein	1759559	1760296	+	PROKKA_01576	hypothetical protein	1759559	1760296	+					1	0	0	0	0	0	0
1582	PFR_JS15-1_1544	Glutamine synthetase, type I	1760352	1761686	-	PROKKA_01577	putative glutamine synthetase 2	1760352	1761686	-	6.3.1.2	glnA_2	similar to AA sequence:UniProtKB:A0R083		1	0	0	0	0	0	0
1583	PFR_JS15-1_1545	Hypothetical protein	1761893	1762774	+	PROKKA_01578	hypothetical protein	1761893	1762774	+					0	0	0	0	0	0	0
1584	PFR_JS15-1_1546	Hypothetical protein	1762859	1763806	+	PROKKA_01579	hypothetical protein	1762859	1763806	+					0	0	0	0	0	0	0
1585	PFR_JS15-1_1547	Methionyl aminopeptidase	1763886	1764794	+	PROKKA_01580	Methionine aminopeptidase 2	1763886	1764794	+	3.4.11.18	map_2	similar to AA sequence:UniProtKB:P0A5J2		1	0	0	0	0	0	0
1586	PFR_JS15-1_1548	S-layer y domain ribonuclease	1764933	1765778	-	PROKKA_01581	Cellulosome-anchoring protein precursor	1764933	1765778	-		ancA_2	similar to AA sequence:UniProtKB:Q06848		1	0	0	0	0	0	0
1587	PFR_JS15-1_1549	Zn-ribbon protein, possibly nucleic acid-binding	1766369	1767112	-	PROKKA_01582	Putative zinc ribbon domain protein	1766369	1767112	-			protein motif:Pfam:PF02591.9		1	0	0	0	0	0	0
1588	PFR_JS15-1_1550	Peptidase, M24 family	1767285	1768739	+	PROKKA_01583	Xaa-Pro aminopeptidase 1	1767285	1768739	+	3.4.11.9	pepPI	similar to AA sequence:UniProtKB:P0A3Z2		1	0	0	0	0	0	0
1589	PFR_JS15-1_1551	Hypothetical protein	1768866	1769732	-	PROKKA_01584	hypothetical protein	1768866	1769732	-					1	0	0	0	0	0	0
1590	PFR_JS15-1_1552	Citrate lyase beta chain citrase beta chain	1769877	1770740	-	PROKKA_01585	(3S)-malyl-CoA thioesterase	1769877	1770740	-	3.1.2.-	mcl2	similar to AA sequence:UniProtKB:D3JV05		1	0	0	0	0	0	0
1591	PFR_JS15-1_1553	CBS domain pair protein	1770921	1772198	+	PROKKA_01586	Magnesium transporter MgtE	1770921	1772198	+			similar to AA sequence:UniProtKB:Q5SMG8		1	0	0	0	0	0	0
1592	PFR_JS15-1_1554	PF06210 family protein	1772195	1772758	+	PROKKA_01587	hypothetical protein	1772195	1772758	+					1	0	0	0	0	0	0
1593	PFR_JS15-1_1555	Mrp ATPase family protein	1772902	1774059	+	PROKKA_01588	Flagellum site-determining protein YlxH	1772902	1774059	+		ylxH	similar to AA sequence:UniProtKB:P40742		1	0	0	0	0	0	0
1594	PFR_JS15-1_1556	Sec-independent protein translocase protein TatB	1774226	1774675	-	PROKKA_01589	sec-independent translocase	1774226	1774675	-			protein motif:CLUSTERS:PRK01371		1	0	0	0	0	0	0
1595	PFR_JS15-1_1557	Dihydrodipicolinate synthase	1774770	1775651	-	PROKKA_01590	4-hydroxy-tetrahydrodipicolinate synthase	1774770	1775651	-	4.3.3.7	dapA	similar to AA sequence:UniProtKB:P63945		1	0	0	0	0	0	0
1596	PFR_JS15-1_1558	O-methyltransferase mdmC	1775795	1776460	+	PROKKA_01591	Putative O-methyltransferase/MSMEI_4947	1775795	1776460	+	2.1.1.-		similar to AA sequence:UniProtKB:A0R2D5		1	0	0	0	0	0	0
1597	PFR_JS15-1_1559	Glucose-1-phosphate adenylyltransferase 2	1776598	1777788	-	PROKKA_01592	Glucose-1-phosphate adenylyltransferase	1776598	1777788	-	2.7.7.27	glgC	similar to AA sequence:UniProtKB:P64241		1	0	0	0	0	0	0
1598	PFR_JS15-1_1560	Starch synthase	1777943	1779160	+	PROKKA_01593	Capsular glucan synthase	1777943	1779160	+	2.4.1.21	glgA	similar to AA sequence:UniProtKB:O05313		1	0	0	0	0	0	0
1599	PFR_JS15-1_1561	Hypothetical protein	1779339	1779506	-	PROKKA_01594	hypothetical protein	1779339	1779506	-					1	0	0	0	0	0	0
1600	PFR_JS15-1_1562	Hypothetical protein	1779566	1779958	-	PROKKA_01595	hypothetical protein	1779566	1779958	-					1	0	0	0	0	0	0
1601	PFR_JS15-1_1563	Chloride transporter, chloride channel family	1779981	1781306	-	PROKKA_01596	H(+)/Cl(-) exchange transporter ClcA	1779981	1781306	-		clcA	similar to AA sequence:UniProtKB:Q8ZRP8		1	0	0	0	0	0	0
1602	PFR_JS15-1_1564	Rossmann fold nucleotide-binding protein	1781521	1782357	-	PROKKA_01597	LOG family protein ORF6 in fasciation locus	1781521	1782357	-		fas6	similar to AA sequence:UniProtKB:P46378		1	0	0	0	0	0	0
1603	PFR_JS15-1_1565	Succinyl-diaminopimelate desuccinylase	1782519	1783607	-	PROKKA_01598	Succinyl-diaminopimelate desuccinylase	1782519	1783607	-	3.5.1.18	dapE_3	similar to AA sequence:UniProtKB:Q59284		1	0	0	0	0	0	0
1604	PFR_JS15-1_1566	2,3,4,5-tetrahydropyridine-2-carboxylateN-succiny	1783707	1784645	+	PROKKA_01599	2,3,4,5-tetrahydropyridine-2,6-dicarboxylate N-succinyltransferase	1783707	1784645	+	2.3.1.117	dapD	similar to AA sequence:UniProtKB:O05302		1	0	0	0	0	0	0
1605	PFR_JS15-1_1567	Conserved hypothetical secreted protein	1784652	1785497	+	PROKKA_01600	hypothetical protein	1784652	1785497	+					1	0	0	0	0	0	0
1606	PFR_JS15-1_1568	Succinyldiaminopimelate transaminase	1785525	1786616	-	PROKKA_01601	LL-diaminopimelate aminotransferase	1785525	1786616	-	2.6.1.83	dapL	similar to AA sequence:UniProtKB:Q7NDX4		1	0	0	0	0	0	0
1607	PFR_JS15-1_1569	Putative FERREDOXIN FDXC	1786613	1786933	-	PROKKA_01602	Ferredoxin	1786613	1786933	-			similar to AA sequence:UniProtKB:P13279		1	0	0	0	0	0	0
1608	PFR_JS15-1_1570	Putative glyoxylate reductase	1787169	1788137	+	PROKKA_01603	Putative 2-hydroxyacid dehydrogenase	1787169	1788137	+	1.1.1.-		similar to AA sequence:UniProtKB:Q99RW8		1	0	0	0	0	0	0
1609	PFR_JS15-1_1571	Fumarate hydratase class II	1788301	1789725	+	PROKKA_01604	Fumarate hydratase class II	1788301	1789725	+	4.2.1.2	fumC	similar to AA sequence:UniProtKB:Q92PB6		1	0	0	0	0	0	0
1610	PFR_JS15-1_1572	Hypothetical protein	1789889	1790335	+	PROKKA_01605	hypothetical protein	1789889	1790335	+					1	0	0	0	0	0	0
1611	PFR_JS15-1_1573	Aspartate ammonia-lyase (Aspartase)	1790463	1791932	+	PROKKA_01606	Aspartate ammonia-lyase	1790463	1791932	+	4.3.1.1	aspA_1	similar to AA sequence:UniProtKB:P0AC38		1	0	0	0	0	0	0
1612	PFR_JS15-1_1574	Aspartate ammonia-lyase (Aspartase)	1792259	1793731	+	PROKKA_01607	Aspartate ammonia-lyase	1792259	1793731	+	4.3.1.1	aspA_2	similar to AA sequence:UniProtKB:P0AC38		0	0	0	0	0	0	0
1613	PFR_JS15-1_1575	Transporter, anaerobic C4-dicarboxylate uptake	1793736	1795031	+	PROKKA_01608	Anaerobic C4-dicarboxylate transporter DcuA	1793736	1795031	+		dcuA_2	similar to AA sequence:UniProtKB:P0ABN5		0	0	0	0	0	0	0
1614	PFR_JS15-1_1576	Major facilitator superfamily (MFS) multidrug	1795128	1796465	-	PROKKA_01609	enterobactin exporter EntS	1795128	1796465	-			protein motif:CLUSTERS:PRK10489		0	0	0	0	0	0	0
1615	PFR_JS15-1_1577	Regulatory protein, MarR	1796462	1797094	-	PROKKA_01610	DNA-binding transcriptional repressor MarR	1796462	1797094	-			protein motif:CLUSTERS:PRK11512		0	0	0	0	0	0	0
1616	PFR_JS15-1_1578	Phosphinothricin acetyltransferase	1797148	1797660	+	PROKKA_01611	N-acyltransferase YncA	1797148	1797660	+	2.3.1.-	yncA	similar to AA sequence:UniProtKB:P76112		0	0	0	0	0	0	0
1617	PFR_JS15-1_1579	Phosphoribosyl transferase domain protein	1797720	1798226	+	PROKKA_01612	Xanthine phosphoribosyltransferase	1797720	1798226	+	2.4.2.22	gpt	similar to AA sequence:UniProtKB:P0A9M5		0	0	0	0	0	0	0
1618	PFR_JS15-1_1580	Peptidase M20D, amidohydrolase	1798312	1799481	-	PROKKA_01613	putative hydrolase YxeP	1798312	1799481	-	3.-.-.-	yxeP_2	similar to AA sequence:UniProtKB:P54955		1	0	0	0	0	0	0
1619	PFR_JS15-1_1581	Hypothetical protein	1799642	1800805	+	PROKKA_01614	hypothetical protein	1799642	1800805	+					0	0	0	0	0	0	0
1620	PFR_JS15-1_1582	Hypothetical protein	1800691	1800933	-	PROKKA_01615	hypothetical protein	1800691	1800933	-					0	0	0	0	0	0	0
1621	PFR_JS15-1_1583	Diacylglycerol kinase catalytic region	1800896	1801942	-	PROKKA_01616	Diacylglycerol kinase	1800896	1801942	-	2.7.1.107	dagK_2	similar to AA sequence:UniProtKB:O31502		0	0	0	0	0	0	0
1622	PFR_JS15-1_1584	Cysteine synthase	1802396	1803364	+	PROKKA_01617	Cysteine synthase	1802396	1803364	+	2.5.1.47	cysK	similar to AA sequence:UniProtKB:P63871		1	0	0	0	0	0	0
1623	PFR_JS15-1_1585	Band 7 protein	1803584	1804552	+	PROKKA_01618	SPFH domain / Band 7 family protein	1803584	1804552	+			protein motif:Pfam:PF01145.19		0	0	0	0	0	0	0
1624	PFR_JS15-1_1586	Hypothetical protein	1804565	1804789	+	PROKKA_01619	hypothetical protein	1804565	1804789	+					0	0	0	0	0	0	0
1625	PFR_JS15-1_1587	Cyanate permease	1804891	1806168	-	PROKKA_01620	putative transporter YycB	1804891	1806168	-		yycB	similar to AA sequence:UniProtKB:P37482		0	0	0	0	0	0	0
1626	PFR_JS15-1_1588	ABC transporter, quaternary amine uptake	1806316	1807215	-	PROKKA_01621	Putative osmoprotectant uptake system substrate-binding protein OsmF precursor	1806316	1807215	-		osmF_2	similar to AA sequence:UniProtKB:P33362		0	0	0	0	0	0	0
1627	PFR_JS15-1_1589	Peptidyl-tRNA hydrolase PTH2	1807253	1807966	-	PROKKA_01622	hypothetical protein	1807253	1807966	-					0	0	0	0	0	0	0
1628	PFR_JS15-1_1590	Glyoxalase/bleomycin resistance	1808067	1808960	+	PROKKA_01623	3-demethylubiquinone-9 3-methyltransferase	1808067	1808960	+			protein motif:Pfam:PF06983.7		0	0	0	0	0	0	0
1629	PFR_JS15-1_1591	MFS transporter	1809162	1810931	+	PROKKA_01624	Antiseptic resistance protein	1809162	1810931	+		qacA_4	similar to AA sequence:UniProtKB:P0A0J9		0	0	0	0	0	0	0
1630	PFR_JS15-1_1592	Glycerate kinase	1810995	1812113	-	PROKKA_01625	Glycerate 2-kinase	1810995	1812113	-	2.7.1.165	garK	similar to AA sequence:UniProtKB:P23524		0	0	0	0	0	0	0
1631	PFR_JS15-1_1593	Carbon starvation protein	1812486	1814882	+	PROKKA_01626	Carbon starvation protein A	1812486	1814882	+		cstA	similar to AA sequence:UniProtKB:P15078		0	0	0	0	0	0	0
1632	PFR_JS15-1_1594	Hypothetical protein	1814872	1815087	+	PROKKA_01627	hypothetical protein	1814872	1815087	+					0	0	0	0	0	0	0
1633	PFR_JS15-1_1595	Transcriptional regulator	1815091	1816011	-	PROKKA_01628	HTH-type transcriptional regulator CysL	1815091	1816011	-		cysL	similar to AA sequence:UniProtKB:P39647		0	0	0	0	0	0	0
1634	PFR_JS15-1_1596	UPF0324 membrane protein	1816081	1817163	+	PROKKA_01629	hypothetical protein	1816081	1817163	+					0	0	0	0	0	0	0
1635	PFR_JS15-1_1597	Molybdenum cofactor biosynthesis protein moeB2	1817212	1818441	-	PROKKA_01630	putative adenylyltransferase/sulfurtransferase MoeZ	1817212	1818441	-		moeZ_1	similar to AA sequence:UniProtKB:Q7D5X9		0	0	0	0	0	0	0
1636	PFR_JS15-1_1598	Thiazole synthase	1818450	1819280	-	PROKKA_01631	Thiazole synthase	1818450	1819280	-	2.8.1.10	thiG	similar to AA sequence:UniProtKB:A0QQL0		0	0	0	0	0	0	0
1637	PFR_JS15-1_1599	Thiamine biosynthesis protein	1819283	1819516	-	PROKKA_01632	sulfur carrier protein ThiS	1819283	1819516	-			protein motif:CLUSTERS:PRK05863		0	0	0	0	0	0	0
1638	PFR_JS15-1_1600	Glycine oxidase ThiO	1819513	1820766	-	PROKKA_01633	Hydrogen cyanide synthase subunit HcnC precursor	1819513	1820766	-	1.4.99.5	hcnC	similar to AA sequence:UniProtKB:G3XD12		0	0	0	0	0	0	0
1639	PFR_JS15-1_1601	Thiamine-phosphate diphosphorylase	1820942	1821589	+	PROKKA_01634	Thiamine-phosphate synthase	1820942	1821589	+	2.5.1.3	thiE_2	similar to AA sequence:UniProtKB:P66916		0	0	0	0	0	0	0
1640	PFR_JS15-1_1602	Hypothetical protein	1822104	1822277	+	PROKKA_01635	hypothetical protein	1822104	1822277	+					0	0	0	0	0	0	0
1641	PFR_JS15-1_1603	UPF0324 membrane protein	1822274	1823437	+	PROKKA_01636	hypothetical protein	1822274	1823437	+					0	0	0	0	0	0	0
1642	PFR_JS15-1_1604	Bile acid:sodium symporter	1823520	1824608	-	PROKKA_01637	Sodium Bile acid symporter family protein	1823520	1824608	-			protein motif:Pfam:PF01758.10		0	0	0	0	0	0	0
1643	PFR_JS15-1_1605	Hypothetical protein	1824748	1825083	+	PROKKA_01638	Aerobic glycerol-3-phosphate dehydrogenase	1824748	1825083	+	1.1.5.3	glpD_1	similar to AA sequence:UniProtKB:P18158		0	0	0	0	0	0	0
1644	PFR_JS15-1_1606	Uma4 protein	1825165	1826472	+	PROKKA_01639	Transposase	1825165	1826472	+			protein motif:Pfam:PF01610.11		0	0	0	0	0	0	0
1645	PFR_JS15-1_1607	Hypothetical protein	1826528	1826941	+	PROKKA_01640	Aerobic glycerol-3-phosphate dehydrogenase	1826528	1826941	+	1.1.5.3	glpD_2	similar to AA sequence:UniProtKB:Q7A5V7		0	0	0	0	0	0	1
1646	PFR_JS15-1_1608	Integrase, catalytic region	1826881	1827789	-	PROKKA_01641	Integrase core domain protein	1826881	1827789	-			protein motif:Pfam:PF00665.20		0	0	0	0	0	0	1
1647	PFR_JS15-1_1609	Glycerol phosphate dehydrogenase	1827916	1829187	+	PROKKA_01642	Aerobic glycerol-3-phosphate dehydrogenase	1827916	1829187	+	1.1.5.3	glpD_3	similar to AA sequence:UniProtKB:P18158		0	0	0	0	0	0	1
1648	PFR_JS15-1_1610	Alkylglycerone-phosphate synthase	1829184	1830716	+	PROKKA_01643	putative FAD-linked oxidoreductase	1829184	1830716	+	1.-.-.-		similar to AA sequence:UniProtKB:Q50685		0	0	0	0	0	0	1
1649	PFR_JS15-1_1611	GlpP family transcriptional regulator	1830805	1831464	+	PROKKA_01644	Glycerol-3-phosphate responsive antiterminator	1830805	1831464	+			protein motif:Pfam:PF04309.6		0	0	0	0	0	0	1
1650	PFR_JS15-1_1612	Hypothetical protein	1831443	1831709	-	PROKKA_01645	anaerobic benzoate catabolism transcriptional regulator	1831443	1831709	-			protein motif:CLUSTERS:PRK08154		0	0	0	0	0	0	1
1651	PFR_JS15-1_1613	Uma4 protein	1831802	1832911	-	PROKKA_01646	Transposase	1831802	1832911	-			protein motif:Pfam:PF01610.11		0	1	0	1	0	0	1
1652	PFR_JS15-1_1614	D-lactate dehydrogenase, FAD-binding, NADH	1833563	1835278	+	PROKKA_01647	D-lactate dehydrogenase	1833563	1835278	+	1.1.1.28	dld	similar to AA sequence:UniProtKB:P06149	D-lactate dehydrogenase	0	1	0	1	0	0	1
1653	PFR_JS15-1_1615	Transposase for IS3514b	1835652	1836272	+	PROKKA_01648	hypothetical protein	1835652	1836272	+					0	1	0	1	0	0	1
1654	PFR_JS15-1_1616	Hypothetical protein	1836218	1836454	+	PROKKA_01649	hypothetical protein	1836218	1836454	+					0	1	0	1	0	0	1
1655	PFR_JS15-1_1617	ISRs2 transposase	1836418	1836714	-	PROKKA_01650	hypothetical protein	1836418	1836714	-					0	1	0	1	0	0	1
1656	PFR_JS15-1_1618	Transposase, ISlxx5	1836737	1837936	-	PROKKA_01651	Integrase core domain protein	1836737	1837936	-			protein motif:Pfam:PF00665.20		0	1	0	1	0	0	1
1657	PFR_JS15-1_1619	ISRs2 transposase	1837878	1838900	-	PROKKA_01652	Integrase core domain protein	1837878	1838900	-			protein motif:Pfam:PF00665.20		0	1	0	1	0	0	1
1658	PFR_JS15-1_1620	Insertion element IS6110 uncharacterized 12.0 kDa	1838900	1839211	-	PROKKA_01653	hypothetical protein	1838900	1839211	-					0	1	0	1	0	0	1
1659	PFR_JS15-1_1621	Hypothetical protein	1839502	1840518	+	PROKKA_01654	hypothetical protein	1839502	1840518	+					0	1	0	1	0	0	1
1660	PFR_JS15-1_1622	Excisionase	1840522	1840956	-	PROKKA_01655	Helix-turn-helix domain protein	1840522	1840956	-			protein motif:Pfam:PF12728.1		0	1	0	1	0	0	1
1661	PFR_JS15-1_1623	Mobile element protein	1841503	1842402	+	PROKKA_01656	Transposase	1841503	1842402	+			protein motif:Pfam:PF01610.11		0	1	0	1	0	0	1
1662	PFR_JS15-1_1624	FrnE protein	1842535	1843230	-	PROKKA_01657	DSBA-like thioredoxin domain protein	1842535	1843230	-			protein motif:Pfam:PF01323.14		0	0	0	0	0	0	0
1663	PFR_JS15-1_1625	Inner membrane transport protein ynfM	1843637	1844788	-	PROKKA_01658	Inner membrane transport protein YnfM	1843637	1844788	-		ynfM	similar to AA sequence:UniProtKB:P43531		0	0	0	0	0	0	0
1664	PFR_JS15-1_1626	Transcriptional regulator	1844946	1845911	+	PROKKA_01659	HTH-type transcriptional regulator GltC	1844946	1845911	+		gltC	similar to AA sequence:UniProtKB:P20668		0	0	0	0	0	0	0
1665	PFR_JS15-1_1627	Hypothetical protein	1845875	1846645	-	PROKKA_01660	hypothetical protein	1845875	1846645	-					0	0	0	0	0	0	0
1666	PFR_JS15-1_1628	Hypothetical protein	1846739	1847848	-	PROKKA_01661	hypothetical protein	1846739	1847848	-					0	0	0	0	0	0	0
1667	PFR_JS15-1_1629	Hypothetical protein	1847848	1848072	-	PROKKA_01662	hypothetical protein	1847848	1848072	-					0	1	1	0	0	0	0
1668	PFR_JS15-1_1630	Hypothetical protein	1848860	1849417	-	PROKKA_01663	hypothetical protein	1848860	1849417	-					0	1	1	0	0	0	0
1669	PFR_JS15-1_1631	Hypothetical protein	1849622	1849891	+	PROKKA_01664	hypothetical protein	1849622	1849891	+					0	1	1	0	0	0	0
1670	PFR_JS15-1_1632	Transcription regulator ArsR	1850056	1850553	+	PROKKA_01665	Helix-turn-helix domain protein	1850056	1850553	+			protein motif:Pfam:PF12840.1		0	1	1	0	0	0	0
1671	PFR_JS15-1_1633	Secreted peptidase	1850550	1851422	+	PROKKA_01666	putative peptidase	1850550	1851422	+			protein motif:CLUSTERS:PRK11649		0	1	1	0	0	0	0
1672	PFR_JS15-1_1634	Hypothetical protein	1851528	1851806	-	PROKKA_01667	hypothetical protein	1851528	1851806	-					0	1	1	0	0	0	0
1673	PFR_JS15-1_1635	PF03235 family protein	1852199	1854025	-	PROKKA_01668	hypothetical protein	1852199	1854025	-					0	1	1	0	0	0	0
1674	PFR_JS15-1_1636	GTP-dependent nucleic acid-binding protein EngD	1854127	1855218	-	PROKKA_01669	Ribosome-binding ATPase YchF	1854127	1855218	-		ychF	similar to AA sequence:UniProtKB:P44681		1	0	0	0	0	0	0
1675	PFR_JS15-1_1637	M18 family aminopeptidase	1855313	1856584	-	PROKKA_01670	putative M18 family aminopeptidase 2	1855313	1856584	-	3.4.11.-	apeB	similar to AA sequence:UniProtKB:Q9HYZ3		1	0	0	0	0	0	0
1676	PFR_JS15-1_1638	RmuC family DNA recombination protein	1856734	1858083	+	PROKKA_01671	DNA recombination protein RmuC	1856734	1858083	+		rmuC	similar to AA sequence:UniProtKB:P0AG71		1	0	0	0	0	0	0
1677	PFR_JS15-1_1639	4-hydroxy-3-methylbut-2-enyl diphosphate	1858015	1859253	-	PROKKA_01672	4-hydroxy-3-methylbut-2-enyl diphosphate reductase	1858015	1859253	-	1.17.1.2	ispH	similar to AA sequence:UniProtKB:P62623		1	0	0	0	0	0	0
1678	PFR_JS15-1_1640	Exodeoxyribonuclease VII, large subunit	1859270	1860421	+	PROKKA_01673	Exodeoxyribonuclease 7 large subunit	1859270	1860421	+	3.1.11.6	xseA	similar to AA sequence:UniProtKB:P04994		1	0	0	0	0	0	0
1679	PFR_JS15-1_1641	Exodeoxyribonuclease 7 small subunit	1860469	1860711	+	PROKKA_01674	Exodeoxyribonuclease 7 small subunit	1860469	1860711	+	3.1.11.6	xseB	similar to AA sequence:UniProtKB:Q7VV85		1	0	0	0	0	0	0
1680	PFR_JS15-1_1642	Channel protein, hemolysin III family protein	1860756	1861493	-	PROKKA_01675	Haemolysin-III related	1860756	1861493	-			protein motif:Pfam:PF03006.14		1	0	0	0	0	0	0
1681	PFR_JS15-1_1643	Isoprenyl transferase 2	1861692	1862501	+	PROKKA_01676	(2Z,6E)-farnesyl diphosphate synthase	1861692	1862501	+	2.5.1.68		similar to AA sequence:UniProtKB:Q47SS3		1	0	0	0	0	0	0
1682	PFR_JS15-1_1644	ASCH domain protein	1862514	1863032	-	PROKKA_01677	ASCH domain protein	1862514	1863032	-			protein motif:Pfam:PF04266.8		1	0	0	0	0	0	0
1683	PFR_JS15-1_1645	Conserved protein containing thioredoxin domain	1863070	1865754	-	PROKKA_01678	ASCH domain protein	1863070	1865754	-			protein motif:Pfam:PF04266.8		1	0	0	0	0	0	0
1684	PFR_JS15-1_1646	Mycothiol conjugate amidase Mca	1865927	1866853	-	PROKKA_01679	Mycothiol S-conjugate amidase	1865927	1866853	-	3.5.1.115	mca	similar to AA sequence:UniProtKB:A0R2W9		1	0	0	0	0	0	0
1685	PFR_JS15-1_1647	Transcription elongation factor GreA	1866948	1867451	+	PROKKA_01680	Transcription elongation factor GreA	1866948	1867451	+		greA	similar to AA sequence:UniProtKB:P64279		1	0	0	0	0	0	0
1686	PFR_JS15-1_1648	DoxX protein	1867538	1867990	+	PROKKA_01681	DoxX	1867538	1867990	+			protein motif:Pfam:PF07681.6		1	0	0	0	0	0	0
1687	PFR_JS15-1_1649	Hypothetical protein	1868106	1869068	-	PROKKA_01682	hypothetical protein	1868106	1869068	-					1	0	0	0	0	0	0
1688	PFR_JS15-1_1650	PF01594 domain protein	1869154	1870584	-	PROKKA_01683	pheromone autoinducer 2 transporter	1869154	1870584	-			protein motif:CLUSTERS:PRK12287		1	0	0	0	0	0	0
1689	PFR_JS15-1_1651	Uracil-DNA glycosylase 2	1870765	1871454	+	PROKKA_01684	Uracil-DNA glycosylase	1870765	1871454	+	3.2.2.27	ung	similar to AA sequence:UniProtKB:P67071		1	0	0	0	0	0	0
1690	PFR_JS15-1_1652	Peptide methionine sulfoxide reductase MsrA	1871566	1872201	+	PROKKA_01685	Peptide methionine sulfoxide reductase MsrA	1871566	1872201	+	1.8.4.11	msrA	similar to AA sequence:UniProtKB:Q93S39		1	0	0	0	0	0	0
1691	PFR_JS15-1_1653	Hypothetical protein	1872321	1872851	+	PROKKA_01686	hypothetical protein	1872321	1872851	+					1	0	0	0	0	0	0
1692	PFR_JS15-1_1654	FMN-binding split barrel	1872956	1873603	-	PROKKA_01687	Pyridoxamine 5'-phosphate oxidase	1872956	1873603	-			protein motif:Pfam:PF12900.1		1	0	0	0	0	0	0
1693	PFR_JS15-1_1655	HAD-superfamily hydrolase, subfamily IA,	1873781	1874395	+	PROKKA_01688	?-D-glucose-1-phosphatase	1873781	1874395	+			protein motif:CLUSTERS:PRK09456		1	0	0	0	0	0	0
1694	PFR_JS15-1_1656	PF04978 family protein	1874392	1874898	+	PROKKA_01689	DinB superfamily protein	1874392	1874898	+			protein motif:Pfam:PF12867.1		1	0	0	0	0	0	0
1695	PFR_JS15-1_1657	Hypothetical protein	1874924	1875379	-	PROKKA_01690	hypothetical protein	1874924	1875379	-					1	0	0	0	0	0	0
1696	PFR_JS15-1_1658	Hypothetical protein	1875513	1875917	-	PROKKA_01691	hypothetical protein	1875513	1875917	-			protein motif:Pfam:PF08327.5	Activator of Hsp90 ATPase homolog 1-like protein	1	0	0	0	0	0	0
1697	PFR_JS15-1_1659	Hypothetical protein	1875930	1876019	-	PROKKA_01692	hypothetical protein	1875930	1876019	-					0	0	0	0	0	0	0
1698	PFR_JS15-1_1660	Putative 3-methyladenine DNA glycosylase	1876047	1876697	-	PROKKA_01693	3-methyladenine DNA glycosylase	1876047	1876697	-			protein motif:CLUSTERS:PRK00802		1	0	0	0	0	0	0
1699	PFR_JS15-1_1661	Hypothetical protein	1876906	1877856	+	PROKKA_01694	hypothetical protein	1876906	1877856	+					1	0	0	0	0	0	0
1700	PFR_JS15-1_1662	Hydrolase, NUDIX family	1877905	1878609	+	PROKKA_01695	Nucleoside triphosphatase NudI	1877905	1878609	+	3.6.1.-	nudI	similar to AA sequence:UniProtKB:P52006		1	0	0	0	0	0	0
1701	PFR_JS15-1_1663	Putative CONSERVED TRANSMEMBRANE PROTEIN	1878784	1879596	-	PROKKA_01696	Bax inhibitor 1 like protein	1878784	1879596	-			protein motif:Pfam:PF12811.1		1	0	0	0	0	0	0
1702	PFR_JS15-1_1664	Methyltransferase type 11	1879733	1880482	-	PROKKA_01697	Methyltransferase domain protein	1879733	1880482	-			protein motif:Pfam:PF08241.6		1	0	0	0	0	0	0
1703	PFR_JS15-1_1665	Similar to Nucleoside-diphosphate-sugar	1880785	1881558	+	PROKKA_01698	putative sugar epimerase YhfK	1880785	1881558	+	4.-.-.-	yhfK	similar to AA sequence:UniProtKB:O07609		0	0	0	0	0	0	0
1704	PFR_JS15-1_1666	Cationic amino acid transporter	1881775	1883238	+	PROKKA_01699	putative amino acid permease YhdG	1881775	1883238	+		yhdG_1	similar to AA sequence:UniProtKB:O07576		1	0	0	0	0	0	0
1705	PFR_JS15-1_1667	Phosphopyruvate hydratase	1883296	1884567	-	PROKKA_01700	Enolase	1883296	1884567	-	4.2.1.11	eno_1	similar to AA sequence:UniProtKB:P64074		1	0	0	0	0	0	0
1706	PFR_JS15-1_1668	Transcriptional regulator	1884858	1885496	-	PROKKA_01701	Bacterial regulatory proteins, tetR family	1884858	1885496	-			protein motif:Pfam:PF00440.17		1	0	0	0	0	0	0
1707	PFR_JS15-1_1669	Actinorhodin transporter	1885561	1886988	+	PROKKA_01702	putative transport protein HsrA	1885561	1886988	+		hsrA_2	similar to AA sequence:UniProtKB:P31474		1	0	0	0	0	0	0
1708						PROKKA_01703	tRNA-Leu(taa)	1887071	1887144	-			COORDINATES:profile:Aragorn:1.2		0					0	0
1709	PFR_JS15-1_1670	Exopolyphosphatase	1887254	1888210	-	PROKKA_01704	Guanosine-5'-triphosphate,3'-diphosphate pyrophosphatase	1887254	1888210	-	3.6.1.40	gppA	similar to AA sequence:UniProtKB:P25552		1	0	0	0	0	0	0
1710	PFR_JS15-1_1671	PF04417 family protein	1888207	1888722	-	PROKKA_01705	hypothetical protein	1888207	1888722	-					1	0	0	0	0	0	0
1711						PROKKA_01706	tRNA-Pro(tgg)	1888783	1888865	+			COORDINATES:profile:Aragorn:1.2		0					0	0
1712	PFR_JS15-1_1672	Hypothetical protein	1888802	1889443	-											0	0	0	0	0	0
1713	PFR_JS15-1_1673	Phosphopyruvate hydratase	1889721	1891010	-	PROKKA_01707	Enolase	1889721	1891010	-	4.2.1.11	eno_2	similar to AA sequence:UniProtKB:A0R3B8		1	0	0	0	0	0	0
1714	PFR_JS15-1_1674	MazG family protein	1891125	1891796	-	PROKKA_01708	Nucleoside triphosphate pyrophosphohydrolase	1891125	1891796	-	3.6.1.8	mazG	similar to AA sequence:UniProtKB:P0AEY3		1	0	0	0	0	0	0
1715	PFR_JS15-1_1675	Hypothetical protein	1891796	1892329	-	PROKKA_01709	hypothetical protein	1891796	1892329	-					1	0	0	0	0	0	0
1716	PFR_JS15-1_1676	Transcription-repair coupling factor	1892451	1896146	-	PROKKA_01710	Transcription-repair-coupling factor	1892451	1896146	-	3.6.4.-	mfd	similar to AA sequence:UniProtKB:P64326		1	0	0	0	0	0	0
1717	PFR_JS15-1_1677	Hypothetical protein	1896225	1896590	-	PROKKA_01711	hypothetical protein	1896225	1896590	-					1	0	0	0	0	0	0
1718	PFR_JS15-1_1678	Peptidyl-tRNA hydrolase (Precursor)	1896658	1897248	-	PROKKA_01712	Peptidyl-tRNA hydrolase	1896658	1897248	-	3.1.1.29	pth	similar to AA sequence:UniProtKB:A0R3D3		1	0	0	0	0	0	0
1719	PFR_JS15-1_1679	50S ribosomal protein L25	1897456	1898115	-	PROKKA_01713	50S ribosomal protein L25	1897456	1898115	-		rplY	similar to AA sequence:UniProtKB:Q92N68		1	0	0	0	0	0	0
1720	PFR_JS15-1_1680	Ribose-phosphate diphosphokinase	1898493	1899488	-	PROKKA_01714	Ribose-phosphate pyrophosphokinase	1898493	1899488	-	2.7.6.1	prs_1	similar to AA sequence:UniProtKB:P65232		1	0	0	0	0	0	0
1721	PFR_JS15-1_1681	Bifunctional protein GlmU	1899522	1901069	-	PROKKA_01715	Bifunctional protein GlmU	1899522	1901069	-		glmU	similar to AA sequence:UniProtKB:P96382		1	0	0	0	0	0	0
1722						PROKKA_01716	tRNA-Gln(ttg)	1901255	1901334	-			COORDINATES:profile:Aragorn:1.2		0					0	0
1723	PFR_JS15-1_1682	Aspartate carbomyltransferase	1901496	1902542	+	PROKKA_01717	Aspartate carbamoyltransferase	1901496	1902542	+	2.1.3.2	pyrB	similar to AA sequence:UniProtKB:Q8ZB39		1	0	0	0	0	0	0
1724	PFR_JS15-1_1683	Transcriptional regulator	1902685	1903446	+	PROKKA_01718	Biofilm operon icaADBC HTH-type negative transcriptional regulator IcaR	1902685	1903446	+		icaR	similar to AA sequence:UniProtKB:A6QKF4		1	0	0	0	0	0	0
1725	PFR_JS15-1_1684	4-diphosphocytidyl-2-C-methyl-D-erythritol kinase	1903481	1904458	-	PROKKA_01719	4-diphosphocytidyl-2-C-methyl-D-erythritol kinase	1903481	1904458	-	2.7.1.148	ispE	similar to AA sequence:UniProtKB:P65178		1	0	0	0	0	0	0
1726	PFR_JS15-1_1685	Ribosomal RNA small subunit methyltransferase A	1904535	1905404	-	PROKKA_01720	Ribosomal RNA small subunit methyltransferase A	1904535	1905404	-	2.1.1.182	rsmA	similar to AA sequence:UniProtKB:P66662		1	0	0	0	0	0	0
1727	PFR_JS15-1_1686	Hydrolase, TatD family	1905401	1906429	-	PROKKA_01721	putative deoxyribonuclease YcfH	1905401	1906429	-	3.1.21.-	ycfH	similar to AA sequence:UniProtKB:P0AFQ7		1	0	0	0	0	0	0
1728	PFR_JS15-1_1687	Ribosomal RNA small subunit methyltransferase I	1906562	1907440	-	PROKKA_01722	Ribosomal RNA small subunit methyltransferase I	1906562	1907440	-	2.1.1.198	rsmI	similar to AA sequence:UniProtKB:P0A640		1	0	0	0	0	0	0
1729	PFR_JS15-1_1688	Glycoside hydrolase family 95	1907526	1909913	-	PROKKA_01723	hypothetical protein	1907526	1909913	-					1	0	0	0	0	0	0
1730	PFR_JS15-1_1689	Dolichyl-phosphate-mannose-protein	1910200	1911759	+	PROKKA_01724	putative dolichyl-phosphate-mannose--protein mannosyltransferase	1910200	1911759	+	2.4.1.109	pmt	similar to AA sequence:UniProtKB:O05586		1	0	0	0	0	0	0
1731	PFR_JS15-1_1690	Integral membrane protein with DUF218 domain	1911809	1912873	+	PROKKA_01725	hypothetical protein	1911809	1912873	+					1	0	0	0	0	0	0
1732	PFR_JS15-1_1691	Uracyl permease	1912995	1914545	+	PROKKA_01726	Putative pyrimidine permease RutG	1912995	1914545	+		rutG	similar to AA sequence:UniProtKB:P75892		1	0	0	0	0	0	0
1733	PFR_JS15-1_1692	Twin-arginine translocation pathway signal and	1914576	1915097	-	PROKKA_01727	hypothetical protein	1914576	1915097	-					1	0	0	0	0	0	0
1734	PFR_JS15-1_1693	Galactokinase	1915361	1916557	+	PROKKA_01728	Galactokinase	1915361	1916557	+	2.7.1.6	galK_1	similar to AA sequence:UniProtKB:P0A6T3		1	0	0	0	0	0	0
1735	PFR_JS15-1_1694	UspA domain protein	1916714	1917247	+	PROKKA_01729	Universal stress protein family protein	1916714	1917247	+			protein motif:Pfam:PF00582.20		1	0	0	0	0	0	0
1736	PFR_JS15-1_1695	CrcB-like protein	1917244	1917660	+	PROKKA_01730	Putative fluoride ion transporter CrcB	1917244	1917660	+		crcB_1	similar to AA sequence:UniProtKB:P37002		1	0	0	0	0	0	0
1737	PFR_JS15-1_1696	CrcB-like protein	1917657	1918043	+	PROKKA_01731	Putative fluoride ion transporter CrcB	1917657	1918043	+		crcB_2	similar to AA sequence:UniProtKB:P37002		1	0	0	0	0	0	0
1738	PFR_JS15-1_1697	Transcriptional regulatory protein PadR	1918103	1918576	+	PROKKA_01732	acetyltransferase	1918103	1918576	+			protein motif:CLUSTERS:PRK07757		1	0	0	0	0	0	0
1739	PFR_JS15-1_1698	Glutamate dehydrogenase	1918696	1920060	-	PROKKA_01733	NADP-specific glutamate dehydrogenase	1918696	1920060	-	1.4.1.4	gdhA	similar to AA sequence:UniProtKB:P00370		1	0	0	0	0	0	0
1740	PFR_JS15-1_1699	Probable multidrug resistance transporter, MFS	1920215	1921459	-	PROKKA_01734	Multidrug resistance protein stp	1920215	1921459	-		stp_2	similar to AA sequence:UniProtKB:P71879	Putative antibiotic resistance	1	0	0	0	0	0	0
1741	PFR_JS15-1_1700	Hypothetical protein	1921510	1921794	+	PROKKA_01735	hypothetical protein	1921510	1921794	+					0	0	0	0	0	0	0
1742	PFR_JS15-1_1701	Regulatory protein TetR	1921846	1922439	+	PROKKA_01736	Bacterial regulatory proteins, tetR family	1921846	1922439	+			protein motif:Pfam:PF00440.17		1	0	0	0	0	0	0
1743	PFR_JS15-1_1702	Proline/glycine betaine transporter	1922515	1923954	-	PROKKA_01737	Proline/betaine transporter	1922515	1923954	-		proP	similar to AA sequence:UniProtKB:P0C0L7		1	0	0	0	0	0	0
1744	PFR_JS15-1_1703	Drug resistance transporter, EmrB/QacA subfamily	1924093	1925418	-	PROKKA_01738	Multidrug export protein EmrB	1924093	1925418	-		emrB_2	similar to AA sequence:UniProtKB:P0AEJ0	Putative antibiotic resistance	1	0	0	0	0	0	0
1745	PFR_JS15-1_1704	Transcriptional regulator	1925599	1925871	-	PROKKA_01739	Transcriptional repressor SdpR	1925599	1925871	-		sdpR	similar to AA sequence:UniProtKB:O32242		1	0	0	0	0	0	0
1746	PFR_JS15-1_1705	Putative HTH-type transcriptional regulator MarR	1925987	1926406	-	PROKKA_01740	Transcriptional regulator HosA	1925987	1926406	-		hosA	similar to AA sequence:UniProtKB:P69782		1	0	0	0	0	0	0
1747	PFR_JS15-1_1706	Lactoylglutathione lyase and lyase	1926485	1926853	+	PROKKA_01741	Glyoxalase-like domain protein	1926485	1926853	+			protein motif:Pfam:PF12681.1		0	0	0	0	0	0	0
1748	PFR_JS15-1_1707	Secreted peptidase	1926903	1927493	-	PROKKA_01742	Glycyl-glycine endopeptidase LytM precursor	1926903	1927493	-	3.4.24.75	lytM	similar to AA sequence:UniProtKB:O33599		1	0	0	0	0	0	0
1749	PFR_JS15-1_1708	Hypothetical protein	1927603	1927812	-	PROKKA_01743	hypothetical protein	1927603	1927812	-					0	0	0	0	0	0	0
1750	PFR_JS15-1_1709	Hypothetical protein	1927860	1928639	-	PROKKA_01744	hypothetical protein	1927860	1928639	-					0	0	0	0	0	0	0
1751	PFR_JS15-1_1710	Two-component system response regulator	1928802	1929461	-	PROKKA_01745	Transcriptional regulatory protein LiaR	1928802	1929461	-		liaR_2	similar to AA sequence:UniProtKB:O32197		0	0	0	0	0	0	0
1752	PFR_JS15-1_1711	Integral membrane sensor signal transduction	1929458	1930645	-	PROKKA_01746	Sensor histidine kinase DesK	1929458	1930645	-	2.7.13.3	desK_4	similar to AA sequence:UniProtKB:O34757		0	0	0	0	0	0	0
1753	PFR_JS15-1_1712	Hypothetical protein	1930796	1931359	+	PROKKA_01747	hypothetical protein	1930796	1931359	+					0	0	0	0	0	0	0
1754	PFR_JS15-1_1713	Hypothetical protein	1931406	1931957	+	PROKKA_01748	hypothetical protein	1931406	1931957	+					0	0	0	0	0	0	0
1755	PFR_JS15-1_1714	Heat shock protein transcriptional repressor	1932858	1933277	-	PROKKA_01749	Putative heat shock protein HspR	1932858	1933277	-		hspR_2	similar to AA sequence:UniProtKB:P40183		0	0	0	0	0	0	0
1756	PFR_JS15-1_1715	Chaperone protein DnaJ 1	1933279	1934376	-	PROKKA_01750	Chaperone protein DnaJ	1933279	1934376	-		dnaJ_3	similar to AA sequence:UniProtKB:P08622		0	0	0	0	0	0	0
1757	PFR_JS15-1_1716	Protein GrpE	1934373	1934942	-	PROKKA_01751	heat shock protein GrpE	1934373	1934942	-			protein motif:CLUSTERS:PRK10325		0	0	0	0	0	0	0
1758	PFR_JS15-1_1717	Chaperone protein DnaK	1935103	1936932	-	PROKKA_01752	Chaperone protein DnaK	1935103	1936932	-		dnaK_3	similar to AA sequence:UniProtKB:A0QQC8		0	0	0	0	0	0	0
1759	PFR_JS15-1_1718	Trypsin	1937312	1938403	-	PROKKA_01753	Periplasmic pH-dependent serine endoprotease DegQ precursor	1937312	1938403	-	3.4.21.107	degQ	similar to AA sequence:UniProtKB:P39099		0	0	0	0	0	0	0
1760	PFR_JS15-1_1719	Hypothetical protein	1938466	1938987	-	PROKKA_01754	hypothetical protein	1938466	1938987	-					0	0	0	0	0	0	0
1761	PFR_JS15-1_1720	Two-component system response regulator	1939210	1939869	-	PROKKA_01755	Oxygen regulatory protein NreC	1939210	1939869	-		nreC_3	similar to AA sequence:UniProtKB:Q7WZY4		0	0	0	0	0	0	0
1762	PFR_JS15-1_1721	Sensor kinase	1939872	1940795	-	PROKKA_01756	Oxygen sensor histidine kinase NreB	1939872	1940795	-	2.7.13.3	nreB	similar to AA sequence:UniProtKB:Q7WZY5		0	1	0	1	0	0	0
1763	PFR_JS15-1_1722	Hypothetical protein	1940919	1941686	-	PROKKA_01757	Universal stress protein family protein	1940919	1941686	-			protein motif:Pfam:PF00582.20		0	1	0	1	0	0	0
1764	PFR_JS15-1_1723	ATP-dependent chaperone protein ClpB	1941909	1944635	+	PROKKA_01758	Chaperone protein ClpB	1941909	1944635	+		clpB_1	similar to AA sequence:UniProtKB:Q7WSY8		0	1	0	1	0	0	0
1765	PFR_JS15-1_1724	Hypothetical protein	1944704	1945438	-	PROKKA_01759	hypothetical protein	1944704	1945438	-					0	1	0	1	0	0	0
1766	PFR_JS15-1_1725	Thioredoxin	1945543	1945968	-	PROKKA_01760	Thioredoxin	1945543	1945968	-		trxA_1	similar to AA sequence:UniProtKB:P08058		0	1	0	1	0	0	0
1767	PFR_JS15-1_1726	Hypothetical protein	1946330	1946575	+	PROKKA_01761	hypothetical protein	1946330	1946575	+					0	1	0	1	0	0	0
1768						PROKKA_01762	tRNA-Ala(cgc)	1947981	1948055	-			COORDINATES:profile:Aragorn:1.2		0					0	0
1769	PFR_JS15-1_1727	Low similarity to site-specific recombinase	1946581	1948083	+											1	0	1	0	0	0
1770	PFR_JS15-1_1728	Hypothetical protein	1948131	1948934	-	PROKKA_01763	hypothetical protein	1948131	1948934	-					1	0	0	0	0	0	0
1771	PFR_JS15-1_1729	Acetytransferase	1949009	1949719	-	PROKKA_01764	Putative ribosomal N-acetyltransferase YdaF	1949009	1949719	-	2.3.1.-	ydaF	similar to AA sequence:UniProtKB:P96579		1	0	0	0	0	0	0
1772	PFR_JS15-1_1730	Molybdopterin molybdenumtransferase	1949723	1951009	-	PROKKA_01765	Molybdopterin molybdenumtransferase	1949723	1951009	-	2.10.1.1	moeA_1	similar to AA sequence:UniProtKB:P99139		1	0	0	0	0	0	0
1773	PFR_JS15-1_1731	Hypothetical protein	1951028	1951738	+	PROKKA_01766	5-formyltetrahydrofolate cyclo-ligase family protein	1951028	1951738	+			protein motif:CLUSTERS:PRK10333		1	0	0	0	0	0	0
1774	PFR_JS15-1_1732	Type I antifreeze protein	1951894	1952301	+	PROKKA_01767	Zinc ribbon domain protein	1951894	1952301	+			protein motif:Pfam:PF09723.4		0	0	0	0	0	0	0
1775	PFR_JS15-1_1733	Hypothetical protein	1952401	1953042	+	PROKKA_01768	flagellar basal body P-ring biosynthesis protein FlgA	1952401	1953042	+			protein motif:CLUSTERS:PRK12617		1	0	0	0	0	0	0
1776	PFR_JS15-1_1734	Large conductance mechanosensitive channel	1953135	1953578	+	PROKKA_01769	Large-conductance mechanosensitive channel	1953135	1953578	+		mscL	similar to AA sequence:UniProtKB:A5U127		1	0	0	0	0	0	0
1777	PFR_JS15-1_1735	Hypothetical protein	1953632	1954042	-	PROKKA_01770	hypothetical protein	1953632	1954042	-					1	0	0	0	0	0	0
1778	PFR_JS15-1_1736	UDP-glucose pyrophosphorylase 2	1954035	1955408	-	PROKKA_01771	UTP--glucose-1-phosphate uridylyltransferase	1954035	1955408	-			protein motif:Pfam:PF01704.12		1	0	0	0	0	0	0
1779	PFR_JS15-1_1737	Transposase of ISAar20, ISL3 family	1955718	1957025	+	PROKKA_01772	Transposase	1955718	1957025	+			protein motif:Pfam:PF01610.11		0	0	0	0	0	0	0
1780						PROKKA_01773	tRNA-Arg(cct)	1957242	1957317	+			COORDINATES:profile:Aragorn:1.2		0					0	0
1781	PFR_JS15-1_1738	Hypothetical protein	1957414	1957746	+	PROKKA_01774	hypothetical protein	1957414	1957746	+					1	0	0	0	0	0	0
1782	PFR_JS15-1_1739	Isochorismatase family protein	1957891	1958511	-	PROKKA_01775	nicotinamidase/pyrazinamidase	1957891	1958511	-			protein motif:CLUSTERS:PRK11609		1	0	0	0	0	0	0
1783	PFR_JS15-1_1740	Carboxylic ester hydrolase	1958508	1959317	-	PROKKA_01776	acetyl esterase	1958508	1959317	-			protein motif:CLUSTERS:PRK10162		0	0	0	0	0	0	0
1784	PFR_JS15-1_1741	Hypothetical protein	1959469	1959828	+	PROKKA_01777	hypothetical protein	1959469	1959828	+					1	0	0	0	0	0	0
1785	PFR_JS15-1_1742	Thioredoxin	1959993	1960328	-	PROKKA_01778	Putative thioredoxin-2	1959993	1960328	-		trxC_1	similar to AA sequence:UniProtKB:Q9RD25		1	0	0	0	0	0	0
1786	PFR_JS15-1_1743	Iron-dependent repressor and activator IdeR	1960444	1961121	-	PROKKA_01779	Diphtheria toxin repressor	1960444	1961121	-		dtxR	similar to AA sequence:UniProtKB:P0DJL7		1	0	0	0	0	0	0
1787	PFR_JS15-1_1744	Phosphoserine transaminase	1961298	1962419	+	PROKKA_01780	Phosphoserine aminotransferase	1961298	1962419	+	2.6.1.52	serC	similar to AA sequence:UniProtKB:P63514		1	0	0	0	0	0	0
1788	PFR_JS15-1_1745	Hypothetical protein	1962462	1962848	-	PROKKA_01781	hypothetical protein	1962462	1962848	-					1	0	0	0	0	0	0
1789	PFR_JS15-1_1746	Guanine/hypoxanthine permease PbuG	1963010	1964572	-	PROKKA_01782	Guanine/hypoxanthine permease PbuG	1963010	1964572	-		pbuG	similar to AA sequence:UniProtKB:O34987		1	0	0	0	0	0	0
1790	PFR_JS15-1_1747	Hypothetical protein	1964618	1964959	+	PROKKA_01783	hypothetical protein	1964618	1964959	+					1	0	0	0	0	0	0
1791	PFR_JS15-1_1748	PF11228 family protein	1965037	1965816	-	PROKKA_01784	hypothetical protein	1965037	1965816	-					1	0	0	0	0	0	0
1792	PFR_JS15-1_1749	Cold shock protein	1965820	1966206	-	PROKKA_01785	Cold shock-like protein	1965820	1966206	-		csp	similar to AA sequence:UniProtKB:O54310		1	0	0	0	0	0	0
1793	PFR_JS15-1_1750	Hypothetical protein	1966433	1967461	+	PROKKA_01786	hypothetical protein	1966433	1967461	+					0	0	0	0	0	0	0
1794	PFR_JS15-1_1751	Conserved protein, putative helicase of DeaD/DeaH	1967458	1969833	+	PROKKA_01787	hypothetical protein	1967458	1969833	+					0	0	0	0	0	0	0
1795	PFR_JS15-1_1752	Transposase of ISAar20, ISL3 family	1969770	1971077	-	PROKKA_01788	Transposase	1969770	1971077	-			protein motif:Pfam:PF01610.11		0	0	0	0	0	0	0
1796	PFR_JS15-1_1753	Hypothetical protein	1971292	1972245	+	PROKKA_01789	hypothetical protein	1971292	1972245	+					0	1	0	1	0	0	0
1797	PFR_JS15-1_1754	Hypothetical protein	1972270	1972857	+	PROKKA_01790	Endoglucanase C precursor	1972270	1972857	+	3.2.1.4	cenC_1	similar to AA sequence:UniProtKB:P14090		0	1	0	1	0	0	0
1798	PFR_JS15-1_1755	Transposase of ISAar20, ISL3 family	1973298	1974263	+	PROKKA_01791	Transposase	1973298	1974263	+			protein motif:Pfam:PF01610.11		0	1	0	1	0	0	0
1799	PFR_JS15-1_1756	Surface layer protein A (S-layer protein A)	1974574	1975956	-	PROKKA_01792	Endoglucanase C precursor	1974574	1975956	-	3.2.1.4	cenC_2	similar to AA sequence:UniProtKB:P14090		1	1	0	1	0	0	0
1800	PFR_JS15-1_1757	Surface layer protein A (S-layer protein A)	1976605	1978284	-	PROKKA_01793	hypothetical protein	1976605	1978284	-			protein motif:Pfam:PF00395.14	S-layer homology domain	0	1	0	1	0	0	0
1801	PFR_JS15-1_1758	NUDIX hydrolase	1978834	1979394	-	PROKKA_01794	hypothetical protein	1978834	1979394	-			protein motif:CLUSTERS:PRK08999		1	1	0	1	0	0	0
1802	PFR_JS15-1_1759	Hypothetical protein	1982612	1983607	+	PROKKA_01795	hypothetical protein	1982612	1983607	+					1	1	0	1	0	0	0
1803	PFR_JS15-1_1760	60 kDa chaperonin 1	1986180	1987802	-	PROKKA_01796	60 kDa chaperonin 1	1986180	1987802	-		groL1_2	similar to AA sequence:UniProtKB:A0QQU5		1	1	0	1	0	0	0
1804	PFR_JS15-1_1761	Hypothetical protein	1988146	1988427	-	PROKKA_01797	hypothetical protein	1988146	1988427	-					1	1	0	1	0	0	0
1805	PFR_JS15-1_1762	Mannose-6-phosphate isomerase, class I	1988646	1989845	+	PROKKA_01798	Mannose-6-phosphate isomerase	1988646	1989845	+	5.3.1.8	manA	similar to AA sequence:UniProtKB:P00946		1	1	0	1	0	0	0
1806						PROKKA_01799	tRNA-Thr(tgt)	1989979	1990054	+			COORDINATES:profile:Aragorn:1.2		0					0	0
1807	PFR_JS15-1_1763	Conserved transmembrane transport protein MmpL13	1990334	1992664	+	PROKKA_01800	Membrane protein YdfJ	1990334	1992664	+		ydfJ_1	similar to AA sequence:UniProtKB:P96687		1	0	0	0	0	0	0
1808	PFR_JS15-1_1764	Ktn nad-binding domain involved with k transport	1992785	1994926	-	PROKKA_01801	potassium transporter peripheral membrane component	1992785	1994926	-			protein motif:CLUSTERS:PRK09496		1	0	0	0	0	0	0
1809	PFR_JS15-1_1765	Hypothetical protein	1994933	1995316	-	PROKKA_01802	hypothetical protein	1994933	1995316	-					1	0	0	0	0	0	0
1810	PFR_JS15-1_1766	Putative RNase III regulator YmdB	1995401	1995910	+	PROKKA_01803	O-acetyl-ADP-ribose deacetylase	1995401	1995910	+	3.5.1.-	ymdB_2	similar to AA sequence:UniProtKB:P0A8D6		1	0	0	0	0	0	0
1811	PFR_JS15-1_1767	Hypothetical membrane protein (DedA family)	1995935	1996948	-	PROKKA_01804	SNARE associated Golgi protein	1995935	1996948	-			protein motif:Pfam:PF09335.5		1	0	0	0	0	0	0
1812	PFR_JS15-1_1768	Amidohydrolase	1997019	1998293	-	PROKKA_01805	putative hydrolase YxeP	1997019	1998293	-	3.-.-.-	yxeP_3	similar to AA sequence:UniProtKB:P54955		1	0	0	0	0	0	0
1813	PFR_JS15-1_1769	L-serine dehydratase 1	1998469	1999860	+	PROKKA_01806	L-serine dehydratase 1	1998469	1999860	+	4.3.1.17	sdaA	similar to AA sequence:UniProtKB:P16095		1	0	0	0	0	0	0
1814	PFR_JS15-1_1770	ATP binding protein of ABC transporter for	2000076	2001185	+	PROKKA_01807	sn-glycerol-3-phosphate import ATP-binding protein UgpC	2000076	2001185	+	3.6.3.20	ugpC	similar to AA sequence:UniProtKB:P10907		1	0	0	0	0	0	0
1815	PFR_JS15-1_1771	Cystathionine gamma-synthase (Cgs)	2001435	2002622	+	PROKKA_01808	Cystathionine gamma-synthase	2001435	2002622	+	2.5.1.48	metB	similar to AA sequence:UniProtKB:P00935		1	0	0	0	0	0	0
1816	PFR_JS15-1_1772	Lipopolysaccharide kinase, Kdo/WaaP family	2002736	2004118	+	PROKKA_01809	Lipopolysaccharide kinase (Kdo/WaaP) family protein	2002736	2004118	+			protein motif:Pfam:PF06293.8		1	0	0	0	0	0	0
1817	PFR_JS15-1_1773	Hypothetical protein	2004175	2004576	-	PROKKA_01810	hypothetical protein	2004175	2004576	-					1	0	0	0	0	0	0
1818	PFR_JS15-1_1774	Protein of hypothetical function DUF162	2004818	2005474	-	PROKKA_01811	Lactate utilization protein C	2004818	2005474	-		lutC	similar to AA sequence:UniProtKB:O32259		1	0	0	0	0	0	0
1819	PFR_JS15-1_1775	Iron-sulfur cluster-binding protein	2005480	2007018	-	PROKKA_01812	Lactate utilization protein B	2005480	2007018	-		lutB	similar to AA sequence:UniProtKB:O07021		1	0	0	0	0	0	0
1820	PFR_JS15-1_1776	Putative oxididoreductase subunit	2007015	2007824	-	PROKKA_01813	Lactate utilization protein A	2007015	2007824	-		lutA	similar to AA sequence:UniProtKB:O07020		1	0	0	0	0	0	0
1821	PFR_JS15-1_1777	Transporter, lactate permease family protein	2007865	2009568	-	PROKKA_01814	Glycolate permease GlcA	2007865	2009568	-		glcA	similar to AA sequence:UniProtKB:Q46839		1	0	0	0	0	0	0
1822	PFR_JS15-1_1778	FCD domain protein	2010072	2011073	+	PROKKA_01815	Putative L-lactate dehydrogenase operon regulatory protein	2010072	2011073	+		lldR	similar to AA sequence:UniProtKB:P0ACL7		1	0	0	0	0	0	0
1823	PFR_JS15-1_1779	Cysteinyl-tRNA synthetase CysS	2011200	2012603	+	PROKKA_01816	Cysteine--tRNA ligase	2011200	2012603	+	6.1.1.16	cysS	similar to AA sequence:UniProtKB:P21888		1	0	0	0	0	0	0
1824	PFR_JS15-1_1780	RNA methyltransferase, TrmH family, group 3	2012603	2013526	+	PROKKA_01817	Putative TrmH family tRNA/rRNA methyltransferase	2012603	2013526	+	2.1.1.-		similar to AA sequence:UniProtKB:Q7A794		1	0	0	0	0	0	0
1825	PFR_JS15-1_1781	Amino acid permease	2013738	2015225	+	PROKKA_01818	GABA permease	2013738	2015225	+		gabP_1	similar to AA sequence:UniProtKB:P46349		1	0	0	0	0	0	0
1826	PFR_JS15-1_1782	Amino acid permease	2015544	2017034	+	PROKKA_01819	GABA permease	2015544	2017034	+		gabP_2	similar to AA sequence:UniProtKB:P46349		1	0	0	0	0	0	0
1827	PFR_JS15-1_1783	L-asparaginase, type I	2017045	2018046	+	PROKKA_01820	L-asparaginase 1	2017045	2018046	+	3.5.1.1	ansA	similar to AA sequence:UniProtKB:P0A962		1	0	0	0	0	0	0
1828	PFR_JS15-1_1784	Serine hydroxymethyltransferase (Precursor)	2018267	2019715	+	PROKKA_01821	Serine hydroxymethyltransferase	2018267	2019715	+	2.1.2.1	glyA	similar to AA sequence:UniProtKB:A0R2V7		1	0	0	0	0	0	0
1829	PFR_JS15-1_1785	2-C-methyl-D-erythritol 2,4-cyclodiphosphate	2019915	2020415	-	PROKKA_01822	2-C-methyl-D-erythritol 2,4-cyclodiphosphate synthase	2019915	2020415	-	4.6.1.12	ispF	similar to AA sequence:UniProtKB:P65183		1	0	0	0	0	0	0
1830	PFR_JS15-1_1786	2-C-methyl-D-erythritol 4-phosphate	2020412	2021158	-	PROKKA_01823	2-C-methyl-D-erythritol 4-phosphate cytidylyltransferase	2020412	2021158	-	2.7.7.60	ispD	similar to AA sequence:UniProtKB:P96864		1	0	0	0	0	0	0
1831	PFR_JS15-1_1787	Transcriptional regulator, CarD family	2021240	2021725	-	PROKKA_01824	RNA polymerase-binding transcription factor CarD	2021240	2021725	-		carD	similar to AA sequence:UniProtKB:A0R561		1	0	0	0	0	0	0
1832	PFR_JS15-1_1788	Response regulator	2021866	2022543	-	PROKKA_01825	Sensory transduction protein regX3	2021866	2022543	-		regX3	similar to AA sequence:UniProtKB:Q11156		1	0	0	0	0	0	0
1833	PFR_JS15-1_1789	ATPase/histidine kinase/DNA gyrase B/HSP90 domain	2022549	2023796	-	PROKKA_01826	Signal-transduction histidine kinase senX3	2022549	2023796	-	2.7.13.3	senX3	similar to AA sequence:UniProtKB:A0QR01		1	0	0	0	0	0	0
1834	PFR_JS15-1_1790	Phosphate transport system regulatory protein	2024030	2024707	+	PROKKA_01827	hypothetical protein	2024030	2024707	+			similar to AA sequence:UniProtKB:P65720	Phosphate-specific transport system accessory protein PhoU homolog 2	1	0	0	0	0	0	0
1835	PFR_JS15-1_1791	2,3-bisphosphoglycerate-dependent	2024907	2025656	-	PROKKA_01828	2,3-bisphosphoglycerate-dependent phosphoglycerate mutase	2024907	2025656	-	5.4.2.11	gpmA	similar to AA sequence:UniProtKB:P33158		1	0	0	0	0	0	0
1836	PFR_JS15-1_1792	Putative transcription regulator TetR/AcrR	2025987	2026718	+	PROKKA_01829	Bacterial regulatory proteins, tetR family	2025987	2026718	+			protein motif:Pfam:PF00440.17		1	0	0	0	0	0	0
1837	PFR_JS15-1_1793	Oxidoreductase, short chain	2026833	2027552	+	PROKKA_01830	Serine 3-dehydrogenase	2026833	2027552	+	1.1.1.276	sdh	similar to AA sequence:UniProtKB:Q9KWN1		1	0	0	0	0	0	0
1838	PFR_JS15-1_1794	Methylmalonyl-CoA carboxyltransferase 1.3S	2027683	2028054	-	PROKKA_01831	Methylmalonyl-CoA carboxyltransferase 1.3S subunit	2027683	2028054	-	2.1.3.1		similar to AA sequence:UniProtKB:P02904		1	0	0	0	0	0	0
1839	PFR_JS15-1_1795	Hypothetical protein	2028071	2028319	-	PROKKA_01832	Methylmalonyl-CoA carboxyltransferase 12S subunit	2028071	2028319	-	2.1.3.1		similar to AA sequence:UniProtKB:Q8GBW6		1	0	0	0	0	0	0
1840	PFR_JS15-1_1796	Methylmalonyl-CoA carboxyltransferase 12S	2028335	2029909	-	PROKKA_01833	Methylmalonyl-CoA carboxyltransferase 12S subunit	2028335	2029909	-	2.1.3.1		similar to AA sequence:UniProtKB:Q8GBW6		1	0	0	0	0	0	0
1841	PFR_JS15-1_1797	Pyruvate carboxylase subunit B	2029925	2031442	-	PROKKA_01834	Methylmalonyl-CoA carboxyltransferase 5S subunit	2029925	2031442	-	2.1.3.1		similar to AA sequence:UniProtKB:Q70AC7		1	0	0	0	0	0	0
1842	PFR_JS15-1_1798	Glutamate-1-semialdehyde 2,1-aminomutase hemL	2031711	2033036	-	PROKKA_01835	Glutamate-1-semialdehyde 2,1-aminomutase	2031711	2033036	-	5.4.3.8	hemL	similar to AA sequence:UniProtKB:Q5SJS4		1	0	0	0	0	0	0
1843	PFR_JS15-1_1799	Transcriptional regulator	2033094	2033873	-	PROKKA_01836	Bacterial regulatory proteins, tetR family	2033094	2033873	-			protein motif:Pfam:PF00440.17		1	0	0	0	0	0	0
1844	PFR_JS15-1_1800	Drug resistance transporter, EmrB/QacA subfamily	2033925	2035385	+	PROKKA_01837	putative transport protein HsrA	2033925	2035385	+		hsrA_3	similar to AA sequence:UniProtKB:P31474		1	0	0	0	0	0	0
1845	PFR_JS15-1_1801	Porphobilinogen synthase	2035414	2036412	-	PROKKA_01838	Delta-aminolevulinic acid dehydratase	2035414	2036412	-	4.2.1.24	hemB	similar to AA sequence:UniProtKB:P64334		1	0	0	0	0	0	0
1846	PFR_JS15-1_1802	Ferrochelatase	2036535	2037593	-	PROKKA_01839	Ferrochelatase	2036535	2037593	-	4.99.1.1	hemH	similar to AA sequence:UniProtKB:P0A576		1	0	0	0	0	0	0
1847	PFR_JS15-1_1803	Protoporphyrinogen oxidase	2037590	2039158	-	PROKKA_01840	Protoporphyrinogen oxidase	2037590	2039158	-	1.3.3.4	hemY	similar to AA sequence:UniProtKB:P32397		1	0	0	0	0	0	0
1848	PFR_JS15-1_1804	Radical SAM domain protein	2039162	2040283	-	PROKKA_01841	pyrroloquinoline quinone biosynthesis protein PqqE	2039162	2040283	-			protein motif:CLUSTERS:PRK05301		1	0	0	0	0	0	0
1849	PFR_JS15-1_1805	Uroporphyrinogen decarboxylase	2040285	2042183	-	PROKKA_01842	Uroporphyrinogen decarboxylase	2040285	2042183	-	4.1.1.37	hemE	similar to AA sequence:UniProtKB:A0QW23		1	0	0	0	0	0	0
1850	PFR_JS15-1_1806	Porphobilinogen deaminase 1	2042180	2043112	-	PROKKA_01843	Porphobilinogen deaminase	2042180	2043112	-	2.5.1.61	hemC	similar to AA sequence:UniProtKB:P06983		1	0	0	0	0	0	0
1851	PFR_JS15-1_1807	Glutamyl-tRNA reductase HemA	2043109	2044362	-	PROKKA_01844	Glutamyl-tRNA reductase	2043109	2044362	-	1.2.1.70	hemA	similar to AA sequence:UniProtKB:P16618		1	0	0	0	0	0	0
1852	PFR_JS15-1_1808	Aspartate--ammonia ligase	2044571	2046481	+	PROKKA_01845	Putative asparagine synthetase [glutamine-hydrolyzing]	2044571	2046481	+	6.3.5.4	asnB	similar to AA sequence:UniProtKB:P64248		1	0	0	0	0	0	0
1853	PFR_JS15-1_1809	Dihydroxy-acid dehydratase 1	2046614	2048455	+	PROKKA_01846	Dihydroxy-acid dehydratase	2046614	2048455	+	4.2.1.9	ilvD	similar to AA sequence:UniProtKB:P05791		1	0	0	0	0	0	0
1854	PFR_JS15-1_1810	Lysine exporter protein (LYSE/YGGA) (Precursor)	2048783	2049391	-	PROKKA_01847	Arginine exporter protein ArgO	2048783	2049391	-		argO	similar to AA sequence:UniProtKB:P11667		1	0	0	0	0	0	0
1855	PFR_JS15-1_1811	Inosose dehydratase	2049638	2050561	-	PROKKA_01848	Inosose dehydratase	2049638	2050561	-	4.2.1.44	iolE	similar to AA sequence:UniProtKB:P42416		1	0	0	0	0	0	0
1856	PFR_JS15-1_1812	Hypothetical protein	2050736	2051083	-	PROKKA_01849	hypothetical protein	2050736	2051083	-					1	0	0	0	0	0	0
1857	PFR_JS15-1_1813	Inositol 2-dehydrogenase IdhA	2051231	2052220	-	PROKKA_01850	Inositol 2-dehydrogenase	2051231	2052220	-	1.1.1.18	idhA	similar to AA sequence:UniProtKB:O68965		1	0	0	0	0	0	0
1858	PFR_JS15-1_1814	Transaldolase	2052534	2053610	-	PROKKA_01851	Transaldolase	2052534	2053610	-	2.2.1.2	tal_2	similar to AA sequence:UniProtKB:Q31C15		1	0	0	0	0	0	0
1859	PFR_JS15-1_1815	UbiC transcription regulator-associated	2053804	2054556	-	PROKKA_01852	HTH-type transcriptional repressor YvoA	2053804	2054556	-		yvoA	similar to AA sequence:UniProtKB:O34817		1	0	0	0	0	0	0
1860	PFR_JS15-1_1816	Kinase, PfkB family	2054830	2055819	+	PROKKA_01853	5-dehydro-2-deoxygluconokinase	2054830	2055819	+	2.7.1.92	iolC_2	similar to AA sequence:UniProtKB:Q9KAG8		1	0	0	0	0	0	0
1861	PFR_JS15-1_1817	Deoxyribose-phosphate aldolase superfamily	2055822	2056691	+	PROKKA_01854	hypothetical protein	2055822	2056691	+					1	0	0	0	0	0	0
1862	PFR_JS15-1_1818	Myo-inositol catabolism IolB domain protein	2056688	2057560	+	PROKKA_01855	5-deoxy-glucuronate isomerase	2056688	2057560	+	5.3.1.-	iolB	similar to AA sequence:UniProtKB:P42413		1	0	0	0	0	0	0
1863	PFR_JS15-1_1819	Thiamine pyrophosphate enzyme, TPP binding domain	2057660	2059567	+	PROKKA_01856	3D-(3,5/4)-trihydroxycyclohexane-1,2-dione hydrolase	2057660	2059567	+	3.7.1.-	iolD	similar to AA sequence:UniProtKB:P42415		1	0	0	0	0	0	0
1864	PFR_JS15-1_1820	Methylmalonic acid semialdehyde dehydrogenase	2059833	2061338	+	PROKKA_01857	Methylmalonate-semialdehyde dehydrogenase [acylating]	2059833	2061338	+	1.2.1.27	mmsA	similar to AA sequence:UniProtKB:P28810		1	0	0	0	0	0	0
1865	PFR_JS15-1_1821	MFS transporter, sugar porter family protein	2061677	2063275	+	PROKKA_01858	Major myo-inositol transporter IolT	2061677	2063275	+		iolT_2	similar to AA sequence:UniProtKB:O34718		1	0	0	0	0	0	0
1866	PFR_JS15-1_1822	Hypothetical protein	2063441	2064733	+	PROKKA_01859	Sugar (and other) transporter	2063441	2064733	+			protein motif:Pfam:PF00083.18		1	0	0	0	0	0	0
1867	PFR_JS15-1_1823	Possible alcohol dehydrogenase	2064859	2066007	+	PROKKA_01860	S-(hydroxymethyl)mycothiol dehydrogenase	2064859	2066007	+	1.1.1.306		similar to AA sequence:UniProtKB:P80094		1	0	0	0	0	0	0
1868	PFR_JS15-1_1824	Hypothetical protein	2066179	2066346	+	PROKKA_01861	hypothetical protein	2066179	2066346	+					1	0	0	0	0	0	0
1869	PFR_JS15-1_1825	Hypothetical protein	2066307	2066582	-	PROKKA_01862	hypothetical protein	2066307	2066582	-					1	0	0	0	0	0	0
1870	PFR_JS15-1_1826	Fructose-bisphosphate aldolase, class II	2066837	2067859	-	PROKKA_01863	Fructose-bisphosphate aldolase	2066837	2067859	-	4.1.2.13	fba	similar to AA sequence:UniProtKB:Q9ZEM7		1	0	0	0	0	0	0
1871	PFR_JS15-1_1827	Hypothetical protein	2068088	2068714	-	PROKKA_01864	hypothetical protein	2068088	2068714	-					1	0	0	0	0	0	0
1872	PFR_JS15-1_1828	TRNA/rRNA methyltransferase (SpoU)	2068720	2069412	-	PROKKA_01865	Putative TrmH family tRNA/rRNA methyltransferase	2068720	2069412	-	2.1.1.-		similar to AA sequence:UniProtKB:Q7A794		1	0	0	0	0	0	0
1873	PFR_JS15-1_1829	SNARE associated protein	2069488	2070231	+	PROKKA_01866	Inner membrane protein YqjA	2069488	2070231	+		yqjA	similar to AA sequence:UniProtKB:P0AA63		1	0	0	0	0	0	0
1874	PFR_JS15-1_1830	LemA family protein	2070439	2071308	-	PROKKA_01867	LemA family protein	2070439	2071308	-			protein motif:Pfam:PF04011.6		1	0	0	0	0	0	0
1875	PFR_JS15-1_1831	Orotate phosphoribosyltransferase	2071578	2072135	-	PROKKA_01868	Orotate phosphoribosyltransferase	2071578	2072135	-	2.4.2.10	pyrE	similar to AA sequence:UniProtKB:Q8NM11		1	0	0	0	0	0	0
1876	PFR_JS15-1_1832	Sortase family protein, LPXTG-site	2072215	2072823	-	PROKKA_01869	Sortase family protein	2072215	2072823	-			protein motif:Pfam:PF04203.7		0	0	0	0	0	0	0
1877	PFR_JS15-1_1833	Spermidine synthase	2072975	2073892	-	PROKKA_01870	spermidine synthase	2072975	2073892	-			protein motif:CLUSTERS:PRK04457		1	0	0	0	0	0	0
1878	PFR_JS15-1_1834	Oligopeptide transporter, OPT family	2074107	2076098	+	PROKKA_01871	OPT oligopeptide transporter protein	2074107	2076098	+			protein motif:Pfam:PF03169.9		1	0	0	0	0	0	0
1879	PFR_JS15-1_1835	ATP-dependent chaperone protein ClpB	2076219	2078819	-	PROKKA_01872	Chaperone protein ClpB	2076219	2078819	-		clpB_2	similar to AA sequence:UniProtKB:Q7WSY8		1	0	0	0	0	0	0
1880	PFR_JS15-1_1836	Glutamate-1-semialdehyde aminotransferase	2079178	2080545	-	PROKKA_01873	Glutamate-1-semialdehyde 2,1-aminomutase 2	2079178	2080545	-	5.4.3.8	hemL2	similar to AA sequence:UniProtKB:Q81LD0		1	0	0	0	0	0	0
1881	PFR_JS15-1_1837	Amino acid transporter, APC family protein	2080687	2082342	-	PROKKA_01874	putative amino acid permease YhdG	2080687	2082342	-		yhdG_2	similar to AA sequence:UniProtKB:O07576		1	0	0	0	0	0	0
1882	PFR_JS15-1_1838	Adenylosuccinate synthase	2082877	2084160	-	PROKKA_01875	Adenylosuccinate synthetase	2082877	2084160	-	6.3.4.4	purA	similar to AA sequence:UniProtKB:P65880		1	0	0	0	0	0	0
1883	PFR_JS15-1_1839	Hypothetical protein	2084357	2084572	-	PROKKA_01876	hypothetical protein	2084357	2084572	-					1	0	0	0	0	0	0
1884	PFR_JS15-1_1840	Aldehyde dehydrogenase	2084767	2086263	-	PROKKA_01877	Putative aldehyde dehydrogenase AldA	2084767	2086263	-	1.2.1.3	aldA	similar to AA sequence:UniProtKB:Q7A825		1	0	0	0	0	0	0
1885	PFR_JS15-1_1841	Purine nucleosidase	2086682	2087695	+	PROKKA_01878	Pyrimidine-specific ribonucleoside hydrolase RihA	2086682	2087695	+	3.2.-.-	rihA	similar to AA sequence:UniProtKB:P41409		1	0	0	0	0	0	0
1886	PFR_JS15-1_1842	Putative membrane protein	2087795	2088475	-	PROKKA_01879	hypothetical protein	2087795	2088475	-			protein motif:CLUSTERS:PRK11212		1	0	0	0	0	0	0
1887	PFR_JS15-1_1843	Methylated-DNA--protein-cysteine	2088754	2089308	+	PROKKA_01880	Methylated-DNA--protein-cysteine methyltransferase	2088754	2089308	+	2.1.1.63	ogt_1	similar to AA sequence:UniProtKB:P0A696		1	0	0	0	0	0	0
1888	PFR_JS15-1_1844	O-6-methylguanine DNA methyltransferase	2089305	2089940	+	PROKKA_01881	Methylated-DNA--protein-cysteine methyltransferase	2089305	2089940	+	2.1.1.63	ogt_2	similar to AA sequence:UniProtKB:P0A696		0	0	0	0	0	0	0
1889	PFR_JS15-1_1845	Multicopper oxidase	2090161	2091696	+	PROKKA_01882	Copper resistance protein A precursor	2090161	2091696	+		copA_1	similar to AA sequence:UniProtKB:P12374		1	0	0	0	0	0	0
1890	PFR_JS15-1_1846	IS3 family element	2092122	2092466	+	PROKKA_01883	Transposase	2092122	2092466	+			protein motif:Pfam:PF01527.14		0	0	0	0	0	0	0
1891	PFR_JS15-1_1847	Transposase IS6110	2092499	2093386	+	PROKKA_01884	Integrase core domain protein	2092499	2093386	+			protein motif:Pfam:PF00665.20		0	0	0	0	0	0	0
1892	PFR_JS15-1_1848	Hypothetical protein	2093436	2093615	+	PROKKA_01885	hypothetical protein	2093436	2093615	+					0	0	0	0	0	0	0
1893	PFR_JS15-1_1849	Putative polysaccharide syntase	2093612	2095147	+	PROKKA_01886	Cellulose synthase catalytic subunit [UDP-forming]	2093612	2095147	+	2.4.1.12	bcsA	similar to AA sequence:UniProtKB:P37653		1	0	0	0	0	0	0
1894						PROKKA_01887	tRNA-Pro(cgg)	2095264	2095338	-			COORDINATES:profile:Aragorn:1.2		0					0	0
1895	PFR_JS15-1_1850	Putative metallophosphoesterase ykuE	2095489	2096460	-	PROKKA_01888	phosphodiesterase YaeI	2095489	2096460	-			protein motif:CLUSTERS:PRK11340		1	0	0	0	0	0	0
1896	PFR_JS15-1_1851	Transglycosylase	2096457	2098664	-	PROKKA_01889	Penicillin-binding protein 1A/1B	2096457	2098664	-		ponA	similar to AA sequence:UniProtKB:P39793		1	0	0	0	0	0	0
1897	PFR_JS15-1_1852	Transcription factor WhiB	2098860	2099243	+	PROKKA_01890	Transcriptional regulator WhiB4	2098860	2099243	+		whiB4	similar to AA sequence:UniProtKB:O69649		1	0	0	0	0	0	0
1898	PFR_JS15-1_1853	Hypothetical protein	2099233	2099424	+	PROKKA_01891	hypothetical protein	2099233	2099424	+					1	0	0	0	0	0	0
1899	PFR_JS15-1_1854	Endoribonuclease L-PSP family protein	2099421	2099876	+	PROKKA_01892	Enamine/imine deaminase	2099421	2099876	+	3.5.4.-	yabJ	similar to AA sequence:UniProtKB:P37552		1	0	0	0	0	0	0
1900	PFR_JS15-1_1855	Endonuclease III	2099884	2100642	+	PROKKA_01893	Ultraviolet N-glycosylase/AP lyase	2099884	2100642	+		pdg	similar to AA sequence:UniProtKB:P46303		1	0	0	0	0	0	0
1901	PFR_JS15-1_1856	Hydrolase, NUDIX family	2100728	2101423	+	PROKKA_01894	putative NUDIX hydrolase	2100728	2101423	+			protein motif:CLUSTERS:PRK10707		1	0	0	0	0	0	0
1902	PFR_JS15-1_1857	S4 domain protein	2101462	2101815	+	PROKKA_01895	Heat shock protein 15	2101462	2101815	+		hslR	similar to AA sequence:UniProtKB:P0ACG8		1	0	0	0	0	0	0
1903	PFR_JS15-1_1858	Phosphoenolpyruvate-protein phosphotransferase	2101946	2103610	-	PROKKA_01896	Phosphoenolpyruvate-protein phosphotransferase	2101946	2103610	-	2.7.3.9	ptsI	similar to AA sequence:UniProtKB:P08838		1	0	0	0	0	0	0
1904	PFR_JS15-1_1859	Phosphocarrier protein HPr	2103961	2104227	+	PROKKA_01897	Phosphocarrier protein HPr	2103961	2104227	+	2.7.11.-	ptsH	similar to AA sequence:UniProtKB:O50515		1	0	0	0	0	0	0
1905	PFR_JS15-1_1860	Putative cation transporting P-type ATPase	2104341	2106986	+	PROKKA_01898	Silver exporting P-type ATPase	2104341	2106986	+	3.6.3.53	silP	similar to AA sequence:UniProtKB:Q9ZHC7		0	0	0	0	0	0	0
1906	PFR_JS15-1_1861	Mannosyltransferase PIG-V domain protein	2107135	2108352	+	PROKKA_01899	Mannosyltransferase (PIG-V))	2107135	2108352	+			protein motif:Pfam:PF04188.7		1	0	0	0	0	0	0
1907	PFR_JS15-1_1862	Hypothetical protein	2108391	2109527	-	PROKKA_01900	hypothetical protein	2108391	2109527	-					0	0	0	0	0	0	0
1908	PFR_JS15-1_1863	Hypothetical protein	2109524	2110003	-	PROKKA_01901	hypothetical protein	2109524	2110003	-					0	0	0	0	0	0	0
1909	PFR_JS15-1_1864	Hypothetical protein	2110207	2110557	-	PROKKA_01902	hypothetical protein	2110207	2110557	-					0	0	0	0	0	0	0
1910	PFR_JS15-1_1865	Glycoside hydrolase family 2 multidomain protein	2110606	2112453	+	PROKKA_01903	Beta-glucuronidase	2110606	2112453	+	3.2.1.31	uidA	similar to AA sequence:UniProtKB:P05804		1	0	0	0	0	0	0
1911	PFR_JS15-1_1866	Thioredoxin	2112591	2113019	+	PROKKA_01904	Putative thioredoxin-2	2112591	2113019	+		trxC_2	similar to AA sequence:UniProtKB:Q9RD25		1	0	0	0	0	0	0
1912	PFR_JS15-1_1867	FHA domain protein	2113190	2113906	+	PROKKA_01905	FHA domain-containing protein FhaA	2113190	2113906	+		fhaA	similar to AA sequence:UniProtKB:P71590		1	0	0	0	0	0	0
1913	PFR_JS15-1_1868	FHA domain protein	2113909	2114382	+	PROKKA_01906	FHA domain-containing protein FhaB	2113909	2114382	+		fhaB	similar to AA sequence:UniProtKB:P71589		1	0	0	0	0	0	0
1914	PFR_JS15-1_1869	Putative SERINE/THREONINE PHOSPHATASE PPP	2114385	2115920	+	PROKKA_01907	PP2C-family Ser/Thr phosphatase	2114385	2115920	+	3.1.3.16	pstP	similar to AA sequence:UniProtKB:P71588		1	0	0	0	0	0	0
1915	PFR_JS15-1_1870	Cell cycle protein, FtsW/RodA/SpoVE family	2115917	2117305	+	PROKKA_01908	Lipid II flippase FtsW	2115917	2117305	+		ftsW_2	similar to AA sequence:UniProtKB:O07639		1	0	0	0	0	0	0
1916	PFR_JS15-1_1871	Penicillin binding protein transpeptidase domain	2117302	2118726	+	PROKKA_01909	Penicillin-binding protein A	2117302	2118726	+		pbpA	similar to AA sequence:UniProtKB:P71586		1	0	0	0	0	0	0
1917	PFR_JS15-1_1872	Protein kinase family protein with PASTA domain	2118818	2120608	+	PROKKA_01910	Serine/threonine-protein kinase PknB	2118818	2120608	+	2.7.11.1	pknB_1	similar to AA sequence:UniProtKB:A0QNG1		1	0	0	0	0	0	0
1918	PFR_JS15-1_1873	Hypothetical protein	2120732	2122504	+	PROKKA_01911	Serine/threonine-protein kinase PknB	2120732	2122504	+	2.7.11.1	pknB_2	similar to AA sequence:UniProtKB:A0QNG1		1	0	0	0	0	0	0
1919	PFR_JS15-1_1874	Galactokinase	2122721	2123869	-	PROKKA_01912	Galactokinase	2122721	2123869	-	2.7.1.6	galK_2	similar to AA sequence:UniProtKB:P0A6T3		1	0	0	0	0	0	0
1920	PFR_JS15-1_1875	NifU domain protein	2124059	2124706	-	PROKKA_01913	Fe/S biogenesis protein NfuA	2124059	2124706	-		nfuA	protein motif:HAMAP:MF_01637		1	0	0	0	0	0	0
1921	PFR_JS15-1_1876	Ferrous iron transport protein B	2124833	2126797	-	PROKKA_01914	Ferrous iron transport protein B	2124833	2126797	-		feoB	similar to AA sequence:UniProtKB:P33650		1	0	0	0	0	0	0
1922	PFR_JS15-1_1877	Ferrous iron transport protein A	2126976	2127335	-	PROKKA_01915	FeoA domain protein	2126976	2127335	-			protein motif:Pfam:PF04023.8		1	0	0	0	0	0	0
1923	PFR_JS15-1_1878	Hypothetical protein	2127699	2128298	+	PROKKA_01916	hypothetical protein	2127699	2128298	+					1	0	0	0	0	0	0
1924	PFR_JS15-1_1879	Na /H and K /H antiporter	2128380	2129960	-	PROKKA_01917	K(+)/H(+) antiporter NhaP	2128380	2129960	-		nhaP	similar to AA sequence:UniProtKB:Q0ZAH6		1	0	0	0	0	0	0
1925	PFR_JS15-1_1880	Hypothetical protein	2129976	2131835	-	PROKKA_01918	hypothetical protein	2129976	2131835	-					0	0	0	0	0	0	0
1926						PROKKA_01919	tRNA-Ser(cga)	2132165	2132252	-			COORDINATES:profile:Aragorn:1.2		0					0	0
1927	PFR_JS15-1_1881	Cytidine and deoxycytidylate deaminase	2132310	2132741	-	PROKKA_01920	tRNA-specific adenosine deaminase	2132310	2132741	-	3.5.4.33	tadA	similar to AA sequence:UniProtKB:P68398		1	0	0	0	0	0	0
1928	PFR_JS15-1_1882	Putative tRNA adenosine deaminase-associated	2132813	2133541	-	PROKKA_01921	hypothetical protein	2132813	2133541	-					1	0	0	0	0	0	0
1929	PFR_JS15-1_1883	Uracil phosphoribosyltransferase	2133730	2134371	+	PROKKA_01922	Uracil phosphoribosyltransferase	2133730	2134371	+	2.4.2.9	upp	similar to AA sequence:UniProtKB:P70881		1	0	0	0	0	0	0
1930	PFR_JS15-1_1884	Putative fimbrial associated sortase-like	2134314	2135240	-	PROKKA_01923	Sortase family protein	2134314	2135240	-			protein motif:Pfam:PF04203.7	Pilus 1	1	0	0	0	0	0	0
1931	PFR_JS15-1_1885	Hypothetical protein	2135437	2135739	-	PROKKA_01924	hypothetical protein	2135437	2135739	-				Pilus 1	0	0	0	0	0	0	0
1932	PFR_JS15-1_1886	Uma4 protein	2136793	2138100	+	PROKKA_01925	Transposase	2136793	2138100	+			protein motif:Pfam:PF01610.11		0	0	0	0	0	0	0
1933	PFR_JS15-1_1887	Hypothetical protein	2138175	2138447	-	PROKKA_01926	Fimbrial subunit type 1 precursor	2138175	2138447	-			similar to AA sequence:UniProtKB:P18477	Pilus 1	0	0	0	0	0	0	0
1934	PFR_JS15-1_1888	Type-2 fimbrial major subunit	2138540	2139679	-	PROKKA_01927	Fimbrial subunit type 1 precursor	2138540	2139679	-			similar to AA sequence:UniProtKB:P18477	Pilus 1	0	0	0	0	0	0	0
1935	PFR_JS15-1_1889	Surface-anchored fimbrial subunit	2139676	2142264	-	PROKKA_01928	hypothetical protein	2139676	2142264	-				Pilus 1	0	0	0	0	0	0	0
1936	PFR_JS15-1_1890	GTP-binding translation elongation factor typA	2143379	2145262	+	PROKKA_01929	GTP-binding protein TypA/BipA	2143379	2145262	+		typA	similar to AA sequence:UniProtKB:P32132		1	0	0	0	0	0	0
1937	PFR_JS15-1_1891	Folate-binding protein YgfZ	2145352	2146401	-	PROKKA_01930	putative global regulator	2145352	2146401	-			protein motif:CLUSTERS:PRK09559		1	0	0	0	0	0	0
1938	PFR_JS15-1_1892	UPF0678 fatty acid-binding protein-like protein	2146541	2147044	-	PROKKA_01931	hypothetical protein	2146541	2147044	-					1	0	0	0	0	0	0
1939	PFR_JS15-1_1893	D-tyrosyl-tRNA(Tyr) deacylase 1	2147357	2147788	+	PROKKA_01932	D-tyrosyl-tRNA(Tyr) deacylase	2147357	2147788	+	3.1.-.-	dtd	similar to AA sequence:UniProtKB:O66742		1	0	0	0	0	0	0
1940	PFR_JS15-1_1894	Transcriptional regulatory protein GlnR	2147953	2148612	+	PROKKA_01933	Transcriptional regulatory protein YycF	2147953	2148612	+		yycF	similar to AA sequence:UniProtKB:P37478		1	0	0	0	0	0	0
1941	PFR_JS15-1_1895	Inositol 1-phosphate synthase	2148984	2150063	+	PROKKA_01934	Inositol-3-phosphate synthase	2148984	2150063	+	5.5.1.4	ino1	similar to AA sequence:UniProtKB:P71703		1	0	0	0	0	0	0
1942	PFR_JS15-1_1896	Putative oxidoreductase GLYR1 isoform 1	2150488	2151288	+	PROKKA_01935	3-hydroxyisobutyrate dehydrogenase	2150488	2151288	+	1.1.1.31	mmsB	similar to AA sequence:UniProtKB:P28811		0	0	0	0	0	0	0
1943	PFR_JS15-1_1897	Carboxymuconolactone decarboxylase family	2151467	2152192	+	PROKKA_01936	Carboxymuconolactone decarboxylase family protein	2151467	2152192	+			protein motif:Pfam:PF02627.1		1	0	0	0	0	0	0
1944	PFR_JS15-1_1898	UDP-glucose 4-epimerase (UDP-galactose	2152224	2153252	-	PROKKA_01937	UDP-glucose 4-epimerase	2152224	2153252	-	5.1.3.2	galE_3	similar to AA sequence:UniProtKB:P09147		0	0	0	0	0	0	0
1945	PFR_JS15-1_1899	Mycothiol acetyltransferase	2153464	2154402	+	PROKKA_01938	Mycothiol acetyltransferase	2153464	2154402	+	2.3.1.189	mshD_2	similar to AA sequence:UniProtKB:O53831		1	0	0	0	0	0	0
1946	PFR_JS15-1_1900	Polyphosphate kinase	2154399	2156588	+	PROKKA_01939	Polyphosphate kinase	2154399	2156588	+	2.7.4.1	ppk	similar to AA sequence:UniProtKB:P0A7B1		1	0	0	0	0	0	0
1947	PFR_JS15-1_1901	Hydrolase, NUDIX family	2156585	2157475	+	PROKKA_01940	Diadenosine hexaphosphate hydrolase	2156585	2157475	+	3.6.1.61	ndx1	similar to AA sequence:UniProtKB:Q75UV1		1	0	0	0	0	0	0
1948	PFR_JS15-1_1902	Phosphate-binding transport protein of ABC	2157669	2158772	+	PROKKA_01941	Phosphate-binding protein PstS 2 precursor	2157669	2158772	+		pstS2	similar to AA sequence:UniProtKB:O05870		1	0	0	0	0	0	0
1949	PFR_JS15-1_1903	Phosphate ABC transporter, permease protein PstC	2158769	2159749	+	PROKKA_01942	Phosphate transport system permease protein PstC	2158769	2159749	+		pstC	similar to AA sequence:UniProtKB:P0AGH8		1	0	0	0	0	0	0
1950	PFR_JS15-1_1904	Phosphate ABC transporter, inner membrane subunit	2159746	2160906	+	PROKKA_01943	Phosphate transport system permease protein PstA	2159746	2160906	+		pstA	similar to AA sequence:UniProtKB:P07654		1	0	0	0	0	0	0
1951	PFR_JS15-1_1905	Phosphate ABC transport system ATP-binding	2160911	2161690	+	PROKKA_01944	Phosphate import ATP-binding protein PstB	2160911	2161690	+	3.6.3.27	pstB	similar to AA sequence:UniProtKB:B8GYG4		1	0	0	0	0	0	0
1952	PFR_JS15-1_1906	Putative heavy metal reductase	2161671	2162123	-	PROKKA_01945	Arsenate-mycothiol transferase ArsC1	2161671	2162123	-	2.8.4.2	arsC1	similar to AA sequence:UniProtKB:P0DKS5		1	0	0	0	0	0	0
1953	PFR_JS15-1_1907	Toxin-antitoxin system, antitoxin component, ArsR	2162123	2162497	-	PROKKA_01946	Arsenical resistance operon repressor	2162123	2162497	-		arsR	similar to AA sequence:UniProtKB:P45949		1	0	0	0	0	0	0
1954	PFR_JS15-1_1908	Putative arsenic resistance operon repressor	2162594	2163061	+	PROKKA_01947	Arsenical resistance operon trans-acting repressor ArsD	2162594	2163061	+		arsD	similar to AA sequence:UniProtKB:P46003		0	0	0	0	0	0	0
1955	PFR_JS15-1_1909	Arsenical pump-driving ATPase	2163058	2164833	+	PROKKA_01948	Arsenical pump-driving ATPase	2163058	2164833	+	3.6.3.16	arsA	similar to AA sequence:UniProtKB:P08690		1	0	0	0	0	0	0
1956	PFR_JS15-1_1910	Glycosyl hydrolase family 3 protein	2164916	2166145	-	PROKKA_01949	Beta-hexosaminidase	2164916	2166145	-	3.2.1.52	nagZ	similar to AA sequence:UniProtKB:Q8ZQ06		1	0	0	0	0	0	0
1957	PFR_JS15-1_1911	Mycothione reductase	2166199	2167719	-	PROKKA_01950	Mycothione reductase	2166199	2167719	-	1.8.1.15	mtr	similar to AA sequence:UniProtKB:O07927		1	0	0	0	0	0	0
1958	PFR_JS15-1_1912	Phosphoglycerate mutase family protein	2167835	2168494	-	PROKKA_01951	bifunctional RNase H/acid phosphatase	2167835	2168494	-			protein motif:CLUSTERS:PRK07238		1	0	0	0	0	0	0
1959	PFR_JS15-1_1913	Uroporphyrin-III C-methyltransferase hemD	2168549	2170165	-	PROKKA_01952	Uroporphyrinogen-III C-methyltransferase	2168549	2170165	-	2.1.1.107	nasF	similar to AA sequence:UniProtKB:P42437		1	0	0	0	0	0	0
1960	PFR_JS15-1_1914	Pyrroline-5-carboxylate reductase ProC	2170655	2171515	-	PROKKA_01953	Pyrroline-5-carboxylate reductase	2170655	2171515	-	1.5.1.2	proC	similar to AA sequence:UniProtKB:P0A9L8		0	0	0	0	0	0	0
1961	PFR_JS15-1_1915	Aspartate-semialdehyde dehydrogenase asd	2171519	2172553	-	PROKKA_01954	Aspartate-semialdehyde dehydrogenase	2171519	2172553	-	1.2.1.11	asd	similar to AA sequence:UniProtKB:P0C1D8		1	0	0	0	0	0	0
1962	PFR_JS15-1_1916	Hypothetical membrane protein, DUF1211 family	2172645	2173340	-	PROKKA_01955	hypothetical protein	2172645	2173340	-					1	0	0	0	0	0	0
1963	PFR_JS15-1_1917	CAAX amino terminal protease family protein	2173485	2174294	-	PROKKA_01956	CAAX amino terminal protease self- immunity	2173485	2174294	-			protein motif:Pfam:PF02517.10		1	0	0	0	0	0	0
1964	PFR_JS15-1_1918	AP endonuclease, family 2	2174368	2175237	-	PROKKA_01957	fructoselysine 3-epimerase	2174368	2175237	-			protein motif:CLUSTERS:PRK09856		1	0	0	0	0	0	0
1965	PFR_JS15-1_1919	Hypothetical protein	2175468	2176106	+	PROKKA_01958	hypothetical protein	2175468	2176106	+					1	0	0	0	0	0	0
1966	PFR_JS15-1_1920	DNA repair protein radA	2176222	2177616	+	PROKKA_01959	hypothetical protein	2176222	2177616	+			similar to AA sequence:UniProtKB:A0R563	DNA repair protein RadA homolog	1	0	0	0	0	0	0
1967	PFR_JS15-1_1921	DNA integrity scanning protein DisA	2177654	2178724	+	PROKKA_01960	DNA integrity scanning protein DisA	2177654	2178724	+	2.7.7.85	disA	similar to AA sequence:UniProtKB:Q9X8L6		1	0	0	0	0	0	0
1968	PFR_JS15-1_1922	Adenine glycosylase	2178804	2179682	+	PROKKA_01961	A/G-specific adenine glycosylase	2178804	2179682	+	3.2.2.-	mutY	similar to AA sequence:UniProtKB:O53574		1	0	0	0	0	0	0
1969	PFR_JS15-1_1923	HMP/thiamine permease protein ykoE	2179971	2180606	+	PROKKA_01962	Putative HMP/thiamine permease protein YkoE	2179971	2180606	+		ykoE	similar to AA sequence:UniProtKB:O34738		1	0	0	0	0	0	0
1970	PFR_JS15-1_1924	ABC transporter	2180632	2182302	+	PROKKA_01963	Putative HMP/thiamine import ATP-binding protein YkoD	2180632	2182302	+	3.6.3.-	ykoD_2	similar to AA sequence:UniProtKB:O34362		0	0	0	0	0	0	0
1971	PFR_JS15-1_1925	Cobalt transport protein CbiQ	2182299	2183126	+	PROKKA_01964	Putative HMP/thiamine permease protein YkoC	2182299	2183126	+		ykoC	similar to AA sequence:UniProtKB:O34572		1	0	0	0	0	0	0
1972	PFR_JS15-1_1926	Para-aminobenzoate synthase, subunit I	2183137	2183718	+	PROKKA_01965	hypothetical protein	2183137	2183718	+			protein motif:CLUSTERS:PRK06547		1	0	0	0	0	0	0
1973	PFR_JS15-1_1927	3-dehydroquinate dehydratase 2	2183864	2184619	+	PROKKA_01966	3-dehydroquinate dehydratase	2183864	2184619	+	4.2.1.10	aroD	similar to AA sequence:UniProtKB:Q5KY94		1	0	0	0	0	0	0
1974	PFR_JS15-1_1928	Hypothetical protein	2184616	2185302	+	PROKKA_01967	hypothetical protein	2184616	2185302	+					1	0	0	0	0	0	0
1975	PFR_JS15-1_1929	Negative regulator of genetic competence	2185453	2188029	-	PROKKA_01968	ATP-dependent Clp protease ATP-binding subunit ClpC1	2185453	2188029	-		clpC1	similar to AA sequence:UniProtKB:P0A522		1	0	0	0	0	0	0
1976	PFR_JS15-1_1930	Hypothetical protein	2188894	2189250	-	PROKKA_01969	Nucleoid-associated protein Lsr2	2188894	2189250	-		lsr2	similar to AA sequence:UniProtKB:P65648		1	0	0	0	0	0	0
1977	PFR_JS15-1_1931	2-amino-4-hydroxy-6-hydroxymethyldihydropteridine	2189824	2190369	-	PROKKA_01970	2-amino-4-hydroxy-6-hydroxymethyldihydropteridine pyrophosphokinase	2189824	2190369	-	2.7.6.3	folK	similar to AA sequence:UniProtKB:P26281		1	0	0	0	0	0	0
1978	PFR_JS15-1_1932	Dihydroneopterin aldolase	2190366	2190740	-	PROKKA_01971	putative dihydroneopterin aldolase	2190366	2190740	-	4.1.2.25	folB	similar to AA sequence:UniProtKB:P0A580		1	0	0	0	0	0	0
1979	PFR_JS15-1_1933	Dihydropteroate synthase 1 FolP1	2190887	2191720	-	PROKKA_01972	Dihydropteroate synthase 1	2190887	2191720	-	2.5.1.15	folP1	similar to AA sequence:UniProtKB:P0A578		1	0	0	0	0	0	0
1980	PFR_JS15-1_1934	Regulatory protein GntR, HTH	2191857	2192324	-	PROKKA_01973	HTH-type transcriptional repressor YtrA	2191857	2192324	-		ytrA_2	similar to AA sequence:UniProtKB:O34712		0	0	0	0	0	0	0
1981	PFR_JS15-1_1935	GTP cyclohydrolase 1	2192335	2193036	-	PROKKA_01974	GTP cyclohydrolase 1	2192335	2193036	-	3.5.4.16	folE	similar to AA sequence:UniProtKB:P19465		1	0	0	0	0	0	0
1982	PFR_JS15-1_1936	PIF1 helicase	2193063	2195522	-	PROKKA_01975	ATP-dependent RecD-like DNA helicase	2193063	2195522	-	3.6.4.12	recD2_3	protein motif:HAMAP:MF_01488		0	0	0	0	0	0	0
1983	PFR_JS15-1_1937	Hypoxanthine phosphoribosyltransferase	2195594	2196145	-	PROKKA_01976	Hypoxanthine-guanine phosphoribosyltransferase	2195594	2196145	-	2.4.2.8	hpt	similar to AA sequence:UniProtKB:P99085		1	0	0	0	0	0	0
1984	PFR_JS15-1_1938	Cell cycle protein MesJ	2196251	2197240	-	PROKKA_01977	tRNA(Ile)-lysidine synthase	2196251	2197240	-	6.3.4.19	tilS	similar to AA sequence:UniProtKB:Q5L3T3		1	0	0	0	0	0	0
1985	PFR_JS15-1_1939	Coenzyme F420 biosynthesis-associated protein	2197240	2198331	-	PROKKA_01978	hypothetical protein	2197240	2198331	-					0	0	0	0	0	0	0
1986	PFR_JS15-1_1940	D-alanyl-D-alanine carboxypeptidase, serine-type,	2198462	2199832	-	PROKKA_01979	D-alanyl-D-alanine carboxypeptidase precursor	2198462	2199832	-	3.4.16.4	dac	similar to AA sequence:UniProtKB:P39045		1	0	0	0	0	0	0
1987	PFR_JS15-1_1941	Inorganic diphosphatase	2199894	2200451	+	PROKKA_01980	Inorganic pyrophosphatase	2199894	2200451	+	3.6.1.1	ppa	similar to AA sequence:UniProtKB:O69540		1	0	0	0	0	0	0
1988	PFR_JS15-1_1942	Putative DNA modification methylase	2200601	2201857	+	PROKKA_01981	hypothetical protein	2200601	2201857	+					0	0	0	0	0	0	0
1989	PFR_JS15-1_1943	Phosphoglycerate mutase family protein	2201859	2202401	+	PROKKA_01982	Histidine phosphatase superfamily (branch 1)	2201859	2202401	+			protein motif:Pfam:PF00300.1		1	0	0	0	0	0	0
1990	PFR_JS15-1_1944	Magnesium transporter, CorA family	2202405	2203307	+	PROKKA_01983	CorA-like Mg2+ transporter protein	2202405	2203307	+			protein motif:Pfam:PF01544.12		1	0	0	0	0	0	0
1991	PFR_JS15-1_1945	Hypothetical protein	2203464	2204528	+	PROKKA_01984	hypothetical protein	2203464	2204528	+					1	0	0	0	0	0	0
1992	PFR_JS15-1_1946	Ammonium-transport integral membrane protein Amt	2204690	2206051	+	PROKKA_01985	Ammonia channel precursor	2204690	2206051	+		amt	similar to AA sequence:UniProtKB:O66515		1	0	0	0	0	0	0
1993	PFR_JS15-1_1947	Nitrogen regulatory protein P-II glnB	2206048	2206386	+	PROKKA_01986	Nitrogen regulatory protein P-II	2206048	2206386	+		glnB	similar to AA sequence:UniProtKB:P64249		1	0	0	0	0	0	0
1994	PFR_JS15-1_1948	FAD dependent oxidoreductase	2207196	2208551	-	PROKKA_01987	Putrescine oxidase	2207196	2208551	-	1.4.3.10	puo	similar to AA sequence:UniProtKB:P40974		1	0	0	0	0	0	0
[truncated: 377 more rows]
